# Supplementary material for: Inhibition of transcription leads to rewiring of locus-specific chromatin proteomes
Source: Genome Res. 2020 Apr;30(4):635–46. doi: 10.1101/gr.256255.119 (PMC7197482; doi:10.1101/gr.256255.119)
Supplement: Supplemental Material [file supp_gr.256255.119_Supplemental_Table_S1.xlsx]

## Sheet: README
Supplemental Table S1
Epi-Decoder-HO full library barcode counts
Epi-Decoder data (IP and input) log2-transformed median-normalized counts.
The column "binder" indicates the binders that were identified in Korthout et al. 2018, separately for BC_UP and BC_DN.
Raw sequencing data and corresponding reference tables have been submitted to the NCBI BioProject database (https://www.ncbi.nlm.nih.gov/bioproject/) under accession number PRJNA610036, and to the the NCBI BioSample database (https://www.ncbi.nlm.nih.gov/biosample/) under accession number SAMN14271070

## Sheet: BC_UP
ORF	Name	IN1	IN2	IN3	IP1	IP2	IP3	binder
YAL001C	TFC3	-1.02836	0.0493315	-0.594878	-1.27088	0.05633	-0.245022
YAL002W	VPS8	0.972126	0.107561	0.0526691	0.697842	-0.0478708	-0.274346
YAL005C	SSA1	-0.958248	0.617005	0.658649	3.46041	4.61271	5.43498	yes
YAL007C	ERP2	0.60184	0.666269	0.217949	0.3399	0.419504	0.207267
YAL008W	FUN14	0.225585	-0.0890461	-0.165344	-0.935342	-0.550533	-0.611537
YAL009W	SPO7	NA	0.15137	0.253908	NA	-0.117676	0.00611053
YAL010C	MDM10	-0.106371	-0.745505	0.0487925	-0.937086	-1.12892	-0.322627
YAL011W	SWC3	-1.05037	0.429497	0.64025	-1.21681	0.456043	0.965609
YAL012W	CYS3	0.0610435	0.0727341	-0.0634888	2.55634	1.79845	2.13967	yes
YAL015C	NTG1	-1.03399	0.609416	-0.233561	-2.98886	0.875526	-0.902359
YAL016W	TPD3	0.0131995	0.84339	0.434666	0.0828504	1.13856	0.336841
YAL017W	PSK1	0.454279	-0.23167	-0.742098	0.580295	-0.702477	-0.379629
YAL019W	FUN30	-0.390495	0.439923	0.697159	0.797737	1.67916	1.27201
YAL021C	CCR4	-0.515078	0.982276	0.211624	-0.290128	0.990662	0.319785
YAL022C	FUN26	0.760117	0.509632	0.449536	0.454339	0.3803	0.193576
YAL023C	PMT2	-0.27902	0.196257	0.502666	-0.814119	-0.088346	0.260378
YAL024C	LTE1	0.449108	-0.108813	-0.567935	0.801752	-0.772299	-0.890228
YAL026C	DRS2	-0.197072	0.916713	0.643668	-0.165714	1.05542	0.762217
YAL027W	SAW1	-10.6724	-10.6777	-10.6817	-5.48767	-5.9542	-5.42766
YAL029C	MYO4	1.00475	-0.562977	-0.146472	0.757335	-0.473984	-0.452254
YAL031C	GIP4	0.0690416	0.191874	-0.0127927	-0.176756	-0.506287	-0.0220478
YAL032C	PRP45	-0.502183	-0.934161	-0.00565763	-0.48273	-0.568576	-0.427337
YAL033W	POP5	0.923768	0.779114	0.120031	1.23945	1.23058	0.101657
YAL034W-A	MTW1	-0.586868	-0.709056	0.57962	-1.33753	-0.505721	0.297722
YAL035W	FUN12	0.44285	0.739044	-0.27722	0.218725	0.348797	-0.370817
YAL036C	RBG1	0.126046	-0.63606	0.153583	-0.221694	-0.909802	0.244763
YAL038W	CDC19	-1.6253	-1.13083	-1.08735	3.25965	3.55677	2.55628	yes
YAL039C	CYC3	0.97842	-0.0900082	0.0982175	0.614792	-0.224749	-0.163205
YAL041W	CDC24	-0.55575	-0.237847	0.380754	-0.744634	0.0187123	0.241856
YAL043C	PTA1	0.5285	1.04496	0.64186	0.212914	0.618472	0.373415
YAL044C	GCV3	-0.458361	-0.387127	-0.328294	-1.15215	-0.362032	-0.594794
YAL044W-A	#REF!	-1.87209	-2.41579	-0.256837	-2.07336	-2.7933	-0.224844
YAL046C	AIM1	0.271261	0.464151	-0.346128	-0.196313	0.484216	0.119804
YAL047C	SPC72	0.30557	-1.77384	-0.553683	0.123199	-2.88381	-0.827749
YAL049C	AIM2	-1.02857	0.194186	0.620961	-2.60184	0.144888	0.470519
YAL051W	OAF1	-0.413293	-0.166087	0.0964582	-0.912299	-0.118698	0.106215
YAL053W	FLC2	0.853585	-0.254604	0.170852	1.13534	-0.027011	-0.124896
YAL054C	ACS1	-0.17657	0.486559	0.466799	-0.464333	0.684602	0.578586	yes
YAL055W	PEX22	0.333901	1.01751	0.420298	0.116767	1.2097	0.45566
YAL056W	GPB2	1.00949	0.928638	0.104359	0.601512	0.780195	-0.777958
YAL058W	CNE1	-0.243019	0.0356669	-0.206958	-0.718906	-0.856164	-0.907589
YAL059W	ECM1	-0.324787	-0.722421	-0.337778	0.90806	0.0814678	1.15268	yes
YAL060W	BDH1	-0.710976	-0.187872	-1.23047	-1.56414	-0.704372	-0.847718	yes
YAL061W	BDH2	NA	0.0954196	0.53628	NA	0.589609	0.659211	yes
YAR002C-A	ERP1	0.488076	0.0339473	-0.430195	0.299386	0.320997	-1.01262
YAR002W	NUP60	-0.447218	-0.0123837	-0.423112	-0.735103	0.264972	-0.849394
YAR003W	SWD1	0.124425	0.568427	-0.0414327	0.492598	0.806025	-0.542305
YAR007C	RFA1	0.158083	-1.63698	0.00750916	2.68489	-0.339217	2.11868	yes
YAR009C	#N/A	-1.1082	0.728714	-0.117596	-0.598522	0.683828	0.0716718
YAR014C	BUD14	-0.715323	-0.334534	-0.822143	-0.0353793	-2.06181	-0.934029
YAR015W	ADE1	-0.352753	0.353637	0.102957	0.275331	0.898177	0.673292	yes
YAR019C	CDC15	0.26274	-0.0284635	-0.212036	-0.145494	-0.00582908	-0.171322
YAR027W	UIP3	0.760289	0.346049	0.0876289	0.300993	-0.18781	0
YAR028W	#REF!	0.462328	0.559266	0.496676	0.0710961	0.1845	0.395929
YAR031W	PRM9	-0.536291	-1.12607	0.410088	-0.59648	-1.54503	0.0517237
YAR044W	#N/A	0.730587	0.174029	-0.0261469	0.602562	-0.28744	-0.0987378
YAR062W	#REF!	-2.68374	-0.502794	0.0889862	-5.42626	-1.34243	0.0525672
YAR064W	#REF!	-0.31528	0.259564	-0.156926	-0.646304	-0.0655007	-0.386741
YAR071W	PHO11	-0.16265	-0.462187	-0.321928	-1.27991	-1.85406	-0.171322
YBL001C	ECM15	0.21742	-0.429122	0.57962	1.08197	-0.102431	0.720461
YBL002W_1	HTB2_1	-3.56572	-5.12035	-6.65773	3.95272	1.89157	1.05836	yes
YBL002W_2	HTB2_2	-3.19518	-4.77632	-6.48231	4.7414	2.57674	1.26756	yes
YBL002W_3	HTB2_3	-3.58185	-4.83999	-6.17696	3.91324	1.97491	0.611311	yes
YBL003C_1	HTA2_1	-3.4848	-5.2182	-6.44875	2.61507	0.385287	0.00140275	yes
YBL003C_2	HTA2_2	-3.1591	-4.63707	-6.21073	3.78544	1.72209	0.486936	yes
YBL003C_3	HTA2_3	-3.24491	-4.57192	-6.26625	3.9928	1.66819	0.558478	yes
YBL005W	PDR3	-0.0855856	-0.644297	-0.460091	-0.251339	-0.72923	-1.49692
YBL007C	SLA1	-0.181574	0.522566	0.263034	0.0762356	0.512594	0.0381311
YBL008W	HIR1	-0.376656	0.739605	0.252013	-0.0168738	1.21222	0.240041
YBL010C	#REF!	-0.582313	0.537207	0.0152899	-2.48767	0.215729	-0.0652311
YBL011W	SCT1	0.0529409	-0.222392	-3.23873	-0.00700679	-0.725378	-2.4683
YBL013W	FMT1	-2.19489	0.125908	0.120896	-1.97458	-0.103442	0.166383
YBL014C	RRN6	0.917734	0.934801	0.072494	0.963093	0.778	0.0634912
YBL015W	ACH1	0.584373	0.909589	0.577477	-0.133176	1.24204	0.474546
YBL016W	FUS3	-2.33703	-0.666492	NA	-1.28671	-0.582637	NA
YBL017C	PEP1	0.588607	0.610506	-0.347325	0.216403	0.612325	-0.245022
YBL018C	POP8	0.615864	-0.924503	-0.305552	1.14801	0.0912903	-0.0286809
YBL019W	APN2	0.187639	-0.349774	-0.231203	0.055597	-0.790038	-0.402842
YBL021C	HAP3	0.34299	0.179484	0.0782105	0.515272	-0.15978	0.0836514
YBL022C	PIM1	0.831562	0.520709	0.136391	0.560006	0.41386	0.226236
YBL023C	MCM2	-0.88083	-0.60637	-0.746092	0.674356	1.14927	1.25526	yes
YBL024W	NCL1	0.283827	0.0219852	-0.0703893	3.60251	2.25288	2.9411	yes
YBL025W	RRN10	-0.0348948	0.0183785	0.711713	0.0682575	0.369534	0.48323
YBL026W	LSM2	-1.58496	-1.46583	-0.847207	-1.56414	-1.11625	-0.955535
YBL027W	RPL19B	-5.75822	-0.558975	-1.35332	-5.01765	-0.458373	-1.45393
YBL028C	#REF!	-2.27096	-1.46987	-0.14335	0.2222	0.100038	2.3563	yes
YBL029C-A	#REF!	0.497143	0.481093	0.183559	-0.0648667	0.522087	0.439025
YBL029W	#REF!	0.00969142	-0.089005	-0.242886	-0.165737	-0.575685	-0.485148
YBL031W	SHE1	0.318592	0.762686	-0.24452	-0.315532	0.454973	-0.361346
YBL032W	HEK2	-0.88434	-1.24105	-1.02755	-1.12836	-0.90172	-0.811955
YBL033C	RIB1	0.32546	0.870139	0.32605	0.121915	1.15485	1.03904
YBL034C	STU1	-0.0595568	0.264062	-0.0532321	0.12063	0.296576	0.337578
YBL035C	POL12	NA	-0.912848	0.184056	NA	-1.34539	0.877133	yes
YBL036C	#REF!	-0.114005	0.15912	0.174748	0.0041878	0.142782	0.0845297
YBL037W	APL3	-0.571225	-1.31336	-0.842361	-0.724424	-1.31676	-1.21344
YBL038W	MRPL16	0.107731	0.0778835	-0.272666	-0.48273	-0.231366	-0.578242
YBL039C	URA7	0.371286	-0.300509	0.279048	1.89867	0.704015	1.04401	yes
YBL040C	ERD2	-0.140362	-0.297718	0.226822	-0.524828	-0.213786	-0.0676975
YBL042C	FUI1	0.548558	0.13526	0.235694	0.558628	-0.632268	0.101118
YBL045C	COR1	0.51923	0.205697	-0.367823	-0.214989	-0.329718	-0.0651327
YBL046W	PSY4	0.342293	0.664911	0.400471	1.04879	1.1559	0.881183
YBL047C	EDE1	0.923768	0.453625	0.584021	0.666725	0.452911	0.102798
YBL051C	PIN4	-1.36591	-0.168118	-0.246752	-0.700102	-0.329718	-0.280283
YBL052C	SAS3	0.182443	0.062061	0.369531	-0.23315	0.0242282	0.446807
YBL054W	TOD6	0.0361927	-0.163047	0.076962	-0.164201	-0.279704	-0.517375
YBL055C	#REF!	0.315549	-0.133721	0.294886	0.110306	-0.0715533	0.300258
YBL056W	PTC3	0.0114465	0.26186	0.47314	1.03794	1.13486	1.12948	yes
YBL057C	PTH2	-0.0115381	0.26186	0.499475	-0.447078	-0.0128552	0.588527
YBL058W	SHP1	-0.0244815	-0.652529	-0.054665	0.997298	0.638573	0.675927	yes
YBL059C-A	CMC2	-0.859946	-2.54704	-0.389849	-1.47708	-2.65639	-0.602211
YBL059W	#REF!	0.880244	0.270648	0.0161587	1.21939	0.159546	-0.0997352
YBL060W	YEL1	0.0435366	0.0970674	0.464254	-0.0541252	0.272698	-0.222548
YBL061C	SKT5	0.0380482	0.144842	0.293607	0.117863	0.150118	0.574309
YBL063W	KIP1	-0.150893	-0.0520154	0.0463036	-0.13575	-0.481853	0.155428
YBL064C	PRX1	0.779301	0.434068	0.32885	0.854506	0.96228	-0.202053
YBL067C	UBP13	-0.418578	-0.115477	0.29202	-0.614622	-0.486591	-0.0362991
YBL068W	PRS4	-0.351259	-0.203081	-0.321222	-1.82843	-0.380302	-0.425691
YBL071W-A	KTI11	0.140054	-0.526051	-0.137127	0.671817	-0.274	-0.0600168
YBL072C	RPS8A	0.402369	0.6995	-0.259087	-0.363341	0.554509	-0.355066
YBL074C	AAR2	0.274481	-0.633326	0.0265441	0.375713	-1.37526	0.349319
YBL075C	SSA3	-0.216071	0.267724	0.0823646	-1.01405	0.305076	0.00881817
YBL076C	ILS1	-0.209923	-0.41445	0.391794	0.0426986	0.0547925	0.660979
YBL078C	ATG8	0.0463688	0.636332	0.100853	-0.187065	0.652419	0.438121
YBL079W	NUP170	-0.123671	-0.676897	-0.514708	0.0214332	-1.26379	-0.505156
YBL080C	PET112	0.238967	0.0704732	1.00176	-0.044001	-0.407302	0.514852
YBL082C	ALG3	0.149349	-0.196929	-0.537019	-0.181505	-0.330681	-0.799926
YBL084C	CDC27	0.601213	0.371434	0.511276	-0.0536175	0.127021	0.325353
YBL085W	BOI1	-10.5656	0.648496	0.104359	-10.062	0.552584	0.241856
YBL086C	#REF!	0.0924462	0.0595277	0.00569803	-0.278212	0.146992	-0.152572
YBL090W	MRP21	0.0052263	-1.03246	0.0251883	0.0736631	-1.16335	0.142172
YBL091C	MAP2	-0.243019	-0.229603	NA	-0.403897	-0.399607	NA
YBL091C-A	SCS22	0.563589	0.444461	0.132104	0.84442	0.835663	0.402413
YBL093C	ROX3	-0.0577155	0.397091	-0.030626	0.57655	1.16889	0.635433
YBL095W	#REF!	-0.468863	-0.523449	0.221989	-1.28397	-0.458373	0.293731
YBL097W	BRN1	0.454707	NA	-0.212545	1.21175	NA	0.124306
YBL098W	BNA4	0.289024	-0.26515	-0.0369201	0.101212	-0.572221	0.00325507
YBL099W	ATP1	0.517399	0.383652	0.554337	-0.0555773	0.0648384	0.204929
YBL101C	ECM21	-0.379464	0.287244	0.332243	-0.346084	0.156047	0.00732954
YBL102W	SFT2	0.0824622	0.325798	-0.516771	-0.10584	0.125822	-0.73495
YBL103C	RTG3	0.241212	-1.3114	0.531427	0.156191	-1.56877	0.231343
YBL104C	SEA4	-1.99952	0.381187	0.12608	-1.79526	0.102671	-0.0549189
YBL107C	MIC23	-0.523919	0.135817	-0.21582	-0.528716	-0.2604	-0.49304
YBL111C	#REF!	0.0518893	-0.495135	-0.181263	-1.05642	-0.944576	-0.448907
YBR001C	NTH2	0.0212617	-0.0501417	0.144928	-0.00270168	0.0435949	0.0844339
YBR002C	RER2	-0.0949193	0.990929	0.599631	-0.134268	0.969065	0.198756
YBR003W	COQ1	-1.48343	-0.52215	0.221989	-1.7001	-0.508398	-0.383542
YBR006W	UGA2	0.753529	1.40869	0.415743	-0.131309	1.3719	0.316529
YBR007C	DSF2	0.235322	-0.429122	0.23644	-0.544377	-1.19966	-0.39316
YBR009C_1	HHF1_1	-3.71131	-4.98744	-7.37801	5.5398	3.38631	2.23633	yes
YBR009C_2	HHF1_2	-3.52378	-5.34819	-6.72823	5.80976	3.55964	2.2685	yes
YBR009C_3	HHF1_3	-3.57465	-4.86721	-6.63473	5.53093	3.39706	2.10223	yes
YBR010W_1	HHT1_1	-3.67093	-5.60254	-7.38598	5.42657	3.17704	1.99527	yes
YBR010W_2	HHT1_2	-3.97298	-5.30767	-6.99852	5.72827	3.50699	2.08626	yes
YBR010W_3	HHT1_3	-4.14009	-6.13656	-6.82455	5.16245	2.94095	1.65795	yes
YBR011C	IPP1	-0.726374	-0.573704	-0.397267	2.34496	1.1162	2.34622	yes
YBR015C	MNN2	0.131706	-10.6777	0.422921	-0.768053	-10.2761	0.471863
YBR016W	#REF!	0.128475	-0.19189	0.386429	-0.737432	-1.2427	0.465808
YBR017C	KAP104	0.307714	0.722092	-0.0559688	0.555778	0.672243	-0.301818
YBR022W	POA1	0.709964	-0.778706	-0.687324	0.51727	-1.12382	-0.141428
YBR023C	CHS3	-1.97199	-0.00352737	-0.0252528	-4.3388	-0.575685	-0.0593981
YBR024W	SCO2	0.694753	0.147293	-0.0703893	0.364219	-0.00377175	-0.249383
YBR025C	OLA1	-0.428587	0.160298	-0.1496	-1.14021	0.203434	-0.20777
YBR026C	ETR1	0.509232	-1.32918	0.12608	0.23487	-1.51511	0.0410502
YBR028C	YPK3	1.19909	0.562475	0.389785	1.25965	0.663455	0.24947
YBR030W	RKM3	-0.483429	0.213517	0.18107	-0.330727	0.564095	0.412586
YBR034C	HMT1	-0.970253	0.341871	-0.00925231	-0.955945	1.02937	-0.0545552
YBR036C	CSG2	0.870092	0.527625	0.0140478	0.896507	0.535143	-0.113336
YBR037C	SCO1	0.927276	1.06972	-0.0189457	0.287788	1.01172	-0.45058
YBR039W	ATP3	-0.596911	-0.516965	-0.790979	-0.365079	-0.128959	-1.23634
YBR041W	FAT1	-10.6724	-10.6777	-10.6817	-10.0112	-5.81669	-5.17132
YBR042C	CST26	0.447813	0.117508	0.24906	-0.295265	-0.404219	0.123512
YBR043C	QDR3	-0.0403389	0.371448	0.0555697	-2.79206	0.0230836	-0.275659
YBR047W	FMP23	0.265684	-0.415625	-0.00131813	-0.913195	-1.15459	-0.252182
YBR048W	RPS11B	-3.3778	-2.05933	-1.08549	-4.25634	-1.33655	-0.87478
YBR049C	REB1	0.0673553	0.191874	-0.376756	1.20673	1.30931	0.300258	yes
YBR052C	RFS1	-0.309386	-0.0420015	0.172412	-1.05703	0.0681715	0.0827725
YBR053C	#REF!	-0.540439	-0.229342	0.15595	-1.01492	-0.618305	0.229374
YBR054W	YRO2	0.44215	-1.38476	0.0353255	0.412674	-1.92299	-0.213439
YBR055C	PRP6	-0.29413	-0.197939	-0.0405291	-0.127057	0.15014	0.13966
YBR056W	#REF!	0.090787	0.649272	-0.0697307	-0.742101	0.863427	-0.371175
YBR057C	MUM2	0.0131995	0.545679	-0.0623747	-0.296982	0.910609	0.0906633
YBR058C	UBP14	0.154917	0.139264	-0.903601	0.986658	0.3605	-1.3145
YBR059C	AKL1	0.420975	0.797439	0.4037	0.124068	0.912155	0.470302
YBR060C	ORC2	-0.451836	-0.934161	-0.681275	3.59449	2.74199	3.4362	yes
YBR061C	TRM7	0.0426767	0.359502	-0.14439	-0.308829	-0.0208677	0.0446168
YBR062C	#REF!	0.32546	0.433416	-0.581015	0.167438	0.443264	-1.19884
YBR065C	ECM2	-0.265226	0.110914	0.0444797	-0.208737	-0.221451	0.174002
YBR066C	NRG2	-0.829176	0.706167	0.157639	-0.797604	0.7396	0.170741
YBR067C	TIP1	-0.969388	-0.373006	-0.00188341	-0.869753	-0.386444	-0.375575
YBR068C	BAP2	0.208689	0.664355	0.00744675	-0.33527	0.454346	-0.275659
YBR069C	TAT1	-0.318176	NA	0.147252	-2.24968	NA	0.430319
YBR070C	ALG14	-0.759834	0.165145	-1.11862	-0.956138	0.264289	-3.1687
YBR071W	#REF!	0.0982386	-0.808897	0.206304	0.074909	-1.59664	-0.0420393
YBR072W	HSP26	0.229196	-0.889817	0.178633	-0.228229	-1.28177	0.101985
YBR073W	RDH54	-0.559954	0.0405666	0.333737	0.384003	0.451534	0.789398	yes
YBR077C	SLM4	0.48359	0.0193111	0.635816	0.476143	-0.128959	0.258332
YBR079C	RPG1	-9.67243	-10.6777	-10.6817	-6.8413	-10.2761	-5.13816
YBR080C	SEC18	0.489026	0.260319	-0.0113375	0.425794	0.458404	0.122057
YBR081C	SPT7	0.113027	0.633461	0.481343	0.307316	1.00116	0.30177
YBR082C	UBC4	-2.04988	-0.303286	-1.47362	-0.785922	0.287622	-0.653302
YBR083W	TEC1	-0.0817624	-0.906778	0.170239	-0.509377	-0.944576	0.472951
YBR084C-A	RPL19A	-0.0512892	-0.0168324	-0.188823	-0.601836	-0.0752258	-0.229081
YBR084W	MIS1	0.832631	0.216633	0.209021	0.871645	0.473404	0.749161
YBR085W	AAC3	-0.190626	-0.0230836	0.181734	-0.0893863	-0.345387	-0.112764
YBR086C	IST2	0.513689	-0.0320612	-0.242886	0.0041878	0.575625	-0.489063
YBR087W	RFC5	0.0443941	0.38837	0.451465	0.65322	1.08856	0.943994
YBR089C-A	NHP6B	-0.0818383	0.0912917	0.0889862	3.31267	2.72546	3.12405	yes
YBR092C	PHO3	0.538246	0.23517	0.152003	-0.0168738	-1.25932	-0.0449179
YBR093C	PHO5	0.418349	-0.453718	0.26157	0.34192	-0.300276	-0.0927681
YBR094W	PBY1	0.460945	-0.110362	0.416448	0.26775	-0.724775	0.265482
YBR095C	RXT2	0.285402	0.476466	-0.066048	1.26664	1.04918	0.261948
YBR096W	#REF!	0.480864	0.276833	0.323997	0.489662	0.0517946	-0.0409919
YBR097W	VPS15	-0.128867	-0.118192	0.183559	-0.475206	-0.00755339	0.592292
YBR100W	#N/A	0.392991	0.0805036	0.00832032	0.105117	-0.396541	0.135428
YBR101C	FES1	0.746738	0.832898	-0.197358	1.31787	0.983425	-0.674647
YBR103W	SIF2	-0.116429	-0.504084	-0.0733568	0.322738	-0.528633	0.269551
YBR104W	YMC2	-0.49376	0.0390998	-0.174874	-0.638362	0.33213	-0.153607
YBR105C	VID24	-1.82694	-0.106915	0.284107	-2.9132	0.27366	0.59162
YBR106W	PHO88	-0.106147	-6.05483	-10.5821	0.207081	-6.99624	-5.9542
YBR107C	IML3	0.526633	0.504675	0.0947554	0.261403	0.0196445	-0.223634
YBR110W	ALG1	0.846719	0.330008	-0.570542	0.806556	-0.462343	-0.507475
YBR111C	YSA1	0.667981	-0.147313	-0.425469	1.06559	0.257205	-0.50483
YBR112C	CYC8	-1.45184	-0.704628	-0.437484	0.515383	0.293012	0.916817	yes
YBR114W	RAD16	0.0389751	-0.662513	-0.314185	0.295506	-0.975721	-0.388343
YBR115C	LYS2	0.095759	-0.232705	0.00657265	1.00767	0.838269	0.429628
YBR117C	TKL2	0.24196	-0.547149	1.24832	-0.328233	-1.29313	1.12565
YBR118W	TEF2	0.0052943	0.279382	-0.42429	0.285689	0.134327	-0.346105
YBR119W	MUD1	-0.639282	-0.71498	-0.755593	0.00134894	-0.13102	0.441732	yes
YBR120C	CBP6	-10.6724	-10.6777	-10.6817	-5.5518	-4.9542	-6.79023
YBR121C	GRS1	0.296241	1.09666	0.206304	1.46653	1.60193	0.780166
YBR122C	MRPL36	0.36368	0.0317482	0.1819	0.371539	-0.455787	0.349584
YBR123C	TFC1	-0.056793	-0.170151	0.338211	0.436803	0.0454211	0.707769
YBR125C	PTC4	0.754364	0.451563	0.398474	0.756957	0.391874	0.250253
YBR126C	TPS1	0.456213	-0.161035	0.308426	0.744495	-0.278945	0.300258
YBR127C	VMA2	-0.721657	-0.32691	-0.708698	-1.85747	-0.751478	-1.078
YBR129C	OPY1	-0.120717	0.272836	0.298462	-0.238088	-0.111217	0.285056
YBR130C	SHE3	0.269356	-0.724978	-0.116576	-0.0268088	-0.796344	-0.112764
YBR131W	CCZ1	0.653442	0.325095	0.414379	0.801752	0.208698	0.296473
YBR133C	HSL7	1.29822	-0.337154	0.632784	1.14619	-0.50305	0.665155
YBR135W	CKS1	-0.223277	0.0830003	-0.417235	0.443072	0.412126	0.156465
YBR137W	#REF!	-0.412682	-0.916168	-0.193838	-0.296982	-0.87952	-0.170274
YBR138C	#REF!	0.550766	-0.82441	-0.0160879	0.393281	-0.627004	-0.954196
YBR139W	#REF!	0.456213	0.0433795	0.439856	0.930554	-1.007	0.684343
YBR141C	BMT2	-1.03225	-0.39781	0.230035	-0.892121	-0.720114	-0.265486
YBR142W	MAK5	-1.68906	0.155435	0.15595	-1.78592	0.301442	0.298718
YBR143C	SUP45	0.0443941	0.588481	-0.0477742	-0.279908	0.313527	-0.253291
YBR145W	ADH5	0.286852	NA	-0.0761981	0.233137	NA	0.116658
YBR149W	ARA1	-0.886156	-0.280045	0.114362	-1.79206	-0.0715533	0.124367
YBR150C	TBS1	0.454707	0.313676	-0.494679	0.300993	0.451534	-0.807661
YBR151W	APD1	-0.369591	0.0175256	0.643065	-0.143183	0.264289	0.628391
YBR152W	SPP381	0.081627	-0.781387	-0.473443	1.19396	-1.31902	-0.0107473	yes
YBR155W	CNS1	0.180096	0.490134	0.106982	0	0.359847	-0.377165
YBR156C	SLI15	-0.302828	-6.59026	0.547141	-0.669153	-10.2761	0.515504
YBR158W	AMN1	0.680569	-0.12114	-0.602002	0.409629	-0.324992	-1.42076
YBR159W	IFA38	0.307714	0.246351	0.0342843	-0.772823	-0.0813676	0.0579437
YBR160W	CDC28	-2.08371	-0.136623	-2.67605	-2.34589	0.66272	-2.67872
YBR161W	CSH1	0.583534	NA	0.037161	0.0147695	NA	-0.132003
YBR162C	TOS1	-1.71823	0.380272	0.212382	-3.7633	0.603459	0.2526
YBR162W-A	YSY6	0.405725	-0.154158	0.150421	-0.0614005	-0.625073	-0.186076
YBR163W	EXO5	0.78315	0.0580435	0.134677	0.82365	-0.109525	-0.0409919
YBR164C	ARL1	0.55037	0.5832	0.251275	-0.0353793	0.257205	-0.108743
YBR166C	TYR1	0.0724085	0.193416	-0.0190093	0.309573	0.222725	0.0299468
YBR167C	POP7	-0.252465	0.154379	-0.246007	-0.551796	1.44626	-0.380841
YBR168W	PEX32	-0.273257	-1.37301	-0.0179925	-0.261146	-0.966491	-0.336391
YBR169C	SSE2	-0.41076	-0.48371	0.0689097	-0.676184	-0.240238	0.0564422
YBR170C	NPL4	-0.0908582	0.25275	-0.547343	0.251971	0.350276	-0.126645
YBR171W	SEC66	1.29279	0.456263	0.21714	0.876063	0.459774	-0.181144
YBR172C	SMY2	0.115477	0.305274	0.0980417	0.0508189	0.0814276	0.0272084
YBR173C	UMP1	-2.62258	-1.25776	-3.7044	-2.24304	-1.07645	-3.21388
YBR175W	SWD3	-0.248259	0.564264	0.16538	-0.195844	0.878694	-0.23674	yes
YBR176W	ECM31	0.378104	-0.260922	-0.828368	0.115477	-0.898914	-0.569681
YBR177C	EHT1	0.00617451	-0.152958	-0.349721	-0.161179	0.0653581	0.00611053
YBR179C	FZO1	-0.324787	-0.71944	0.21714	-1.0762	-0.975721	0.237707
YBR181C	RPS6B	-1.59028	-0.960043	-1.74504	-2.17834	-1.69492	-2.05456
YBR185C	MBA1	0.534589	-0.36257	-0.0568822	0.340816	-0.481709	-0.26555
YBR187W	GDT1	-0.532874	-0.253553	0.132104	-0.458558	-0.589624	-0.029631
YBR188C	NTC20	-1.51301	-0.556314	NA	-1.46959	-0.491088	NA
YBR189W	RPS9B	-0.75804	-1.9464	-2.34629	-1.24968	-2.39961	-2.62604
YBR193C	MED8	-1.26637	-0.995937	-1.16429	-1.5113	-0.625551	-1.25668
YBR194W	AIM4	-0.00886724	0.062061	0.511232	-0.229868	0.567012	0.728281
YBR195C	MSI1	-0.914202	-0.520373	-0.10803	-0.983321	-1.31612	0.068637
YBR196C	PGI1	-2.12939	-4.9498	-1.38936	-1.98886	-3.18866	-1.69371
YBR197C	#REF!	-0.607683	0.417677	-0.0985949	-0.851356	0.355053	-1.06426
YBR198C	TAF5	-0.767038	0.244865	-0.144459	-1.04544	-0.531291	0.240041	yes
YBR199W	KTR4	0.530311	0.391059	0.307717	0.0802081	0.645717	0.0444647
YBR200W	BEM1	-1.28018	0.0361641	-0.146472	-1.66117	-0.0410725	-0.487878
YBR201W	DER1	0.751269	0.197835	0.230035	0.20474	0.191114	0.0716718
YBR202W	MCM7	0.0724085	0.678732	0.213898	-0.0570309	0.925999	-0.223634
YBR205W	KTR3	-1.30819	0.826793	0.274284	-2.52289	0.634332	0.0182545
YBR207W	FTH1	0.142157	-0.0347654	0.393133	-0.345891	-1.11878	-0.00606469
YBR208C	DUR1,2	0.403054	0.119942	-0.591565	-0.0849313	0.162667	-0.536891
YBR211C	AME1	-0.160673	-0.0722401	0.0690293	-0.400202	0.163706	0.0721838
YBR212W	NGR1	-1.87153	0.178706	0.0538784	-3.92376	0.665657	0.616732	yes
YBR214W	SDS24	-0.479442	-1.00862	-0.0822961	-0.943105	-1.08135	-0.0664145
YBR215W	HPC2	-0.322404	-0.594033	0.268045	0.375706	-0.479225	0.19341	yes
YBR216C	YBP1	0.27375	0.121562	0.166163	-0.0555773	0.0880102	-0.323791
YBR218C	PYC2	-0.297386	0.05699	0.524116	0.0125271	0.716106	1.31867
YBR221C	PDB1	0.323165	-0.208295	0.221182	-0.020387	0.00845056	0.188045
YBR222C	PCS60	0.587906	-1.04836	-0.240808	0.652331	-0.650416	0.126074
YBR223C	TDP1	-0.440165	0.804704	0.21552	-1.13723	0.538389	0.385654
YBR225W	#REF!	0.0537248	0.427641	-0.12271	0.126543	0.200979	-0.229144
YBR227C	MCX1	0.467126	-5.77083	-0.0623747	0.973191	-4.75256	0.184592
YBR229C	ROT2	-0.699845	-0.330317	0.0149794	-1.11368	-0.648986	0.439025
YBR230C	OM14	0.5436	0.914796	-0.0753385	0.0594874	0.739036	-1.33176
YBR231C	SWC5	0.529698	-0.172901	-0.119435	1.24616	0.387434	-0.00699999
YBR233W	PBP2	-0.378954	-0.724978	0.24906	-0.642721	-1.55161	0.285056
YBR233W-A	DAD3	0.235322	0.692803	-0.043953	-0.131309	0.472725	-0.0321988
YBR234C	ARC40	-0.188368	0.43234	-0.376349	-0.227575	0.367897	-1.03722
YBR235W	VHC1	-0.194891	-0.354391	0.0553886	-0.639981	-0.403781	-0.0460407
YBR237W	PRP5	0.0156224	0.245903	0.158482	-0.365079	0.200979	0.192339
YBR238C	#REF!	-0.351259	-1.29994	-0.210365	-0.872222	-1.27742	-0.0409919
YBR239C	ERT1	-10.5656	-10.6398	-3.99718	-7.06205	-10.5812	-5.44724
YBR241C	#REF!	-0.192713	0.0432017	0.102607	-0.389621	0.00563921	-0.049839
YBR242W	#REF!	-0.603647	0.634029	-1.16401	-1.52741	0.542458	-1.22038
YBR244W	GPX2	-0.444045	-1.06425	-0.251225	-1.09915	-1.25477	-0.761255
YBR245C	ISW1	-10.5656	-10.6398	-10.5821	-10.062	-10.5812	-10.2021	yes
YBR246W	RRT2	0.783929	0.590237	0.0623152	0.783189	0.722466	-0.186076
YBR247C	ENP1	-0.434021	0.166201	-4.39628	-0.351231	-0.0329504	-4.05843
YBR248C	HIS7	0.436752	-0.260922	-0.560144	0.832694	0.00116299	-1.13611
YBR249C	ARO4	-0.259855	0.456065	-0.348522	0.783189	1.88091	0.853624	yes
YBR251W	MRPS5	0.810547	0.540738	-1.70256	0.830497	0.701309	-2.58741
YBR252W	DUT1	0.0520885	0.164631	-0.125172	0.658544	-0.267696	0.507667
YBR253W	SRB6	-0.0494584	-0.19189	0.273972	0.12063	0.0356239	0.981257
YBR254C	TRS20	0.68472	1.01216	-0.187679	0.350524	0.908647	-0.615284
YBR255W	MTC4	0.0926333	1.1176	0.57836	0.486776	1.26311	0.162011
YBR256C	RIB5	-0.57045	0.155961	-0.660698	-0.732778	1.00058	-0.519436
YBR258C	SHG1	-0.837658	-0.232525	0.577729	0.0940369	-0.397565	0.714502	yes
YBR259W	#REF!	0.22315	-0.325676	0.132905	0.1612	-1.4464	0.18623
YBR260C	RGD1	0.633636	0.105279	-0.443273	0.734447	-0.323383	-0.631803
YBR261C	TAE1	0.564785	-0.691878	0.166163	0.522102	-0.526255	0.140505
YBR262C	AIM5	-0.0567957	0.0131514	-0.930134	-0.0804899	-0.214078	-0.957342
YBR263W	SHM1	0.777755	0.313093	-0.341828	0.699579	0.716814	-0.288111
YBR264C	YPT10	0.837434	-0.248549	0.306601	1.12654	-0.67431	0.584963
YBR265W	TSC10	0.778786	0.964332	-0.165978	0.862217	1.41213	-0.624607
YBR266C	SLM6	-0.429869	-0.384764	-0.39479	-0.221268	-0.312074	-0.188103
YBR267W	REI1	-0.536291	-0.712015	-0.789352	-0.982561	-1.30508	-1.1909
YBR268W	MRPL37	-0.121679	-0.118343	-0.275473	-0.136246	-0.470381	-0.495611
YBR271W	EFM2	0.270822	0.294542	0.643628	0.139789	0.783896	0.469175
YBR272C	HSM3	-0.549597	0.113443	0.486994	-1.08641	0.299415	0.493848
YBR273C	UBX7	-0.753562	0.285899	0.718668	-1.96138	-0.379792	0.753352
YBR274W	CHK1	-0.829176	-0.288854	-0.0803048	-1.45472	-0.70315	-0.192295
YBR275C	RIF1	-1.90024	-1.21563	-0.739792	-1.93792	-1.2958	-0.442236
YBR278W	DPB3	-2.21299	0.129635	-0.423112	-3.10434	0.482932	-0.147407	yes
YBR279W	PAF1	-0.860248	-0.590257	-0.128048	1.53615	1.5725	1.67563	yes
YBR281C	DUG2	0.221635	0.275022	-0.276536	0.259068	0.31259	-0.189257
YBR282W	MRPL27	-0.073725	1.46284	-0.168514	-0.702297	1.70044	-0.978122
YBR283C	SSH1	-0.698299	0.760019	0.526382	-1.10204	0.914155	0.492234
YBR286W	APE3	-0.00715742	0.29316	0.15426	-0.0286231	0.398939	0.463212
YBR287W	#REF!	0.400377	-0.0908799	-0.717337	0.333069	0.190462	-0.606065
YBR288C	APM3	0.65681	-0.281115	0.373605	0.668253	-0.661415	0.239252
YBR289W	SNF5	0.445867	-0.119299	0.16538	0.738642	-0.375258	0.0426579
YBR290W	BSD2	-0.569811	-0.431559	0.131245	-1.21656	-1.09135	0.172916
YBR299W	MAL32	-0.857042	-0.358048	0.337218	-0.591267	-0.415037	0.213788
YBR302C	COS2	-0.566517	-0.19895	-0.116576	-1.22332	-0.71007	-0.232358
YCL001W	RER1	0.508105	0.166986	-0.0423369	0.316325	-0.146841	0.073954
YCL005W	LDB16	0.793141	0.407089	0.152003	0.792097	-0.132741	0.244763
YCL008C	STP22	0.454013	-1.44997	0.0140478	0.23487	-1.99624	0.111893
YCL009C	ILV6	0.0537248	0.381881	-0.086287	-0.13575	0.40393	-0.404462
YCL010C	SGF29	-0.965665	0.288725	0.266481	-0.857475	0.453598	0.818856	yes
YCL011C	GBP2	-0.305011	0.148829	0.237186	0.703877	1.08143	1.20574	yes
YCL014W	BUD3	0.527839	-0.0718368	-0.114536	0.503056	-0.16969	-0.193695
YCL016C	DCC1	-0.127461	0.0645898	0.184056	-0.331747	-0.340959	0.2635
YCL017C	NFS1	-0.748595	-1.132	0.332243	-0.993268	-1.09537	-0.0284467
YCL024W	KCC4	0.545532	0.0603726	0.146459	0.254388	-0.227638	0.0207985
YCL025C	AGP1	0.926275	-2.40139	-1.48411	0.545284	-3.18888	-1.5655
YCL027C-A	#N/A	0.81109	0.20883	0.0196288	0.729931	0.26115	-0.15773
YCL028W	RNQ1	0.153328	-0.426237	0.179409	0.279943	-1.5482	0.237674
YCL029C	BIK1	0.923768	0.734703	-0.426059	0.865732	0.738472	-0.925999
YCL030C	HIS4	0.194853	0.246351	0.279048	-0.0526745	-0.050917	-0.0107473
YCL031C	RRP7	0.258312	-1.22857	-0.0559688	0.837396	-2.28744	0.376828
YCL032W	STE50	0.4157	0.85707	0.339302	0.665611	0.548039	0.283527
YCL033C	MXR2	-1.03218	-0.54201	-0.257511	-3.14086	-2.35726	-0.733401
YCL034W	LSB5	0.243454	0.34742	0.0196288	-0.226592	0.631517	0.0308585
YCL035C	GRX1	0.0724085	0.12883	-0.0198996	-0.411314	0.555974	-0.67426
YCL037C	SRO9	0.240166	0.840492	0.10173	-1.29386	1.25682	0.225189
YCL039W	GID7	-0.0898447	-0.819614	-0.408465	-0.802303	-1.06945	-1.14143
YCL040W	GLK1	-1.16661	0.136062	-0.31208	-1.15636	0.456891	-0.293806
YCL043C	PDI1	-0.490031	0.19803	-0.530661	-1.21357	0.176117	-1.16923
YCL044C	MGR1	0.718668	0.716109	-0.795872	0.454639	0.644007	-1.44724
YCL045C	EMC1	NA	-0.0186568	-0.065457	NA	-0.275139	-0.417489
YCL047C	POF1	-0.245112	-0.551015	0.200965	-0.531447	-0.605468	0.304788
YCL049C	#REF!	0.554011	0.561718	0.407962	0.699505	0.131326	-0.00245148
YCL050C	APA1	-0.252695	-0.396619	-0.0371775	1.20298	0.877719	1.03747
YCL052C	PBN1	0.341595	-0.655352	-0.0752724	0.453318	-0.918572	0.0712979
YCL055W	KAR4	-0.672277	-0.71944	-0.086287	-0.277411	-0.712378	0.419928
YCL057W	PRD1	-0.942805	0.204159	0.196373	-2.03968	0.673702	0.414339
YCL059C	KRR1	0.107294	-0.33787	0.0359988	-0.0599425	-0.0449032	0.0650813
YCL061C	MRC1	NA	-0.0141615	-0.411382	NA	-0.187336	0.0774879
YCL063W	VAC17	0.701208	0.390184	-0.146472	0.716031	0.284533	-0.152275
YCL064C	CHA1	-0.381943	0.0649753	-0.0294729	-1.02862	-0.00660705	0.167474
YCR002C	CDC10	-1.1866	0.0122783	-1.51677	-1.81647	0.247438	-2.38327
YCR003W	MRPL32	0.274481	0.280108	-0.286144	-0.0182889	0.344095	0.116658
YCR004C	YCP4	-0.274407	-0.583155	-0.349721	0.606839	-0.320281	0.470302
YCR005C	CIT2	0.742761	0.740668	-0.199518	0.82365	0.49361	-0.189499
YCR008W	SAT4	0.216318	0.214064	-0.353003	-0.753839	0.280382	-0.523446
YCR009C	RVS161	0.949629	0.159489	0.0325679	0.432809	-0.139294	-0.149556
YCR011C	ADP1	NA	-0.124093	0.332243	NA	0.0344291	0.115289
YCR012W	PGK1	0.151241	0.0475828	0.285909	4.91684	3.86427	4.83031	yes
YCR016W	#REF!	0.310568	0.470757	0.303453	0.559577	0.679526	0.740035
YCR018C	SRD1	-0.363454	-0.201001	0.35376	-0.218125	-0.372966	0.366782
YCR020C	PET18	0.0268789	0.775949	-0.1496	-0.480846	0.938927	-0.987805
YCR020C-A	MAK31	0.396595	-0.0938631	-0.100343	-0.454716	-0.615416	-0.345698
YCR020W-B	HTL1	0.296241	0.386349	0.143281	2.02598	0.581079	1.66304	yes
YCR021C	HSP30	0.888207	0.783323	0.344895	0.978928	0.506925	0.356297
YCR023C	#REF!	0.5211	-0.0114956	0.14169	0.346325	0.26594	-0.527466
YCR024C	SLM5	0.932591	0.996914	0.642503	0.758611	0.633769	0.465808
YCR024C-A	PMP1	0.501856	0.0148431	-0.099334	0.431809	-0.0227799	-0.324073
YCR026C	NPP1	-0.225728	0.218965	-0.300212	-0.71775	-0.386444	-0.611537
YCR027C	RHB1	-0.0558765	0.117508	-0.190827	-0.931742	0.00580562	-0.131001
YCR028C-A	RIM1	-10.5656	-10.6398	-10.5821	-4.13131	-7.77385	-6.39477
YCR030C	SYP1	0.316969	-0.026668	0.0856792	0.350717	-0.862496	0.0390376
YCR031C	RPS14A	NA	-0.155138	-1.78686	NA	-0.330681	-1.47088
YCR033W	SNT1	-0.476438	0.0771679	-0.461299	-0.394678	0.239575	-0.779005
YCR034W	FEN1	0.121178	-0.0106081	0.400471	-0.156359	-0.162382	0.32574
YCR035C	RRP43	-0.231556	0.156751	0.401802	0.185989	0.349584	0.633034
YCR036W	RBK1	0.295509	-0.289959	0.521146	0.867952	0.0517946	0.780157
YCR037C	PHO87	-0.0148314	-0.458641	-0.1125	-0.387854	-0.458373	-0.156364
YCR038C	BUD5	0.578443	-0.498963	-0.476233	0.500196	-1.30043	-0.80338
YCR039C	MATALPHA2	0.438642	0.339632	0.551	0.354751	0.0725402	0.831299
YCR042C	TAF2	-0.512554	0.287343	0.208587	-0.321229	0.79131	0.163133	yes
YCR043C	#REF!	0.215557	0.436023	-0.0342192	-0.11187	0.290881	-0.000465611
YCR044C	PER1	-0.395138	-0.135655	0.0453919	-1.29698	-0.174149	0.304034
YCR046C	IMG1	NA	0.0563053	-0.427324	NA	-0.153888	-0.345698
YCR047C	BUD23	-1.31048	-1.0834	-0.739163	-1.41504	-1.08137	-1.02394
YCR048W	ARE1	-0.318176	-0.0630098	0.693362	-0.86912	-0.0862998	0.537481
YCR051W	#REF!	0.307866	-0.282241	-0.190898	0.0851588	-1.02661	-0.144132
YCR052W	RSC6	-0.305835	-0.210386	-0.431125	0.709443	0.82766	0.464988
YCR053W	THR4	0.0314782	0.636297	0.215411	1.62721	1.12369	1.4227	yes
YCR054C	CTR86	0.817423	0.157541	-0.149322	0.613568	0.166819	-0.208494
YCR057C	PWP2	0.44425	1.34284	-0.118618	0.86425	1.42407	0.0959387
YCR059C	YIH1	-0.596911	-0.106463	0.516548	-1.41819	0.169506	0.629183
YCR060W	TAH1	-0.655685	0.160298	0.839923	-0.410994	0.375176	0.707769
YCR063W	BUD31	0.184778	-0.192897	-0.092963	0.758611	-0.082599	0.0818931	yes
YCR065W	HCM1	-0.0341967	-0.376524	-0.00282604	-0.0620461	-0.712378	-0.443901
YCR066W	RAD18	-0.57571	-0.88168	-0.180836	-0.851356	-2.30458	-0.331972
YCR067C	SED4	0.305557	0.850055	0.285137	0.100345	0.784028	0.334123
YCR068W	ATG15	0.345065	1.02998	0.606447	-0.137234	0.82766	0.50696
YCR069W	CPR4	0.084131	0.334905	-0.516771	-0.0775366	0.221727	-0.336668
YCR071C	IMG2	-2.20482	-0.343446	0.176303	-2.42626	-0.372243	-0.111758
YCR073C	SSK22	0.842752	1.07101	0.251539	0.533211	0.966658	-0.00736697
YCR073W-A	SOL2	-1.06175	NA	-0.426059	0.255366	NA	1.06232	yes
YCR076C	FUB1	-10.5656	-10.6398	-10.5821	-4.44734	-5.02661	-7.8802
YCR077C	PAT1	0.0127946	0.553732	-0.348522	-0.153654	0.324186	-0.591099
YCR079W	PTC6	-0.768543	-0.125051	-0.0360192	-3.22987	0.0803276	-1.05262
YCR081W	SRB8	-0.118495	-1.15598	0.0344069	-0.534569	-1.40877	0.752799
YCR082W	AHC2	-0.746996	0.25275	0.519834	-0.245063	-0.0933605	0.661288
YCR083W	TRX3	0.0881626	0.218965	0.127803	-1.21342	0.150118	0.506098
YCR084C	TUP1	0.154123	0.76626	0.403131	1.21879	2.20996	1.30554
YCR086W	CSM1	-0.428062	0.0450879	0.0453919	-0.443271	0.183307	-0.115788
YCR087C-A	#REF!	0.660232	0.950326	0.43397	0.768469	1.29532	1.07981
YCR088W	ABP1	0.529819	0.708382	-1.48674	0.536937	0.155201	-2.0123
YCR090C	#REF!	0.571938	0.220882	-0.340715	0.287981	-0.0912491	-0.653607
YCR092C	MSH3	-0.0797488	-0.120157	-0.561162	-0.143183	-0.0478708	-0.738599
YCR093W	CDC39	-5.71823	0.194186	-0.066048	-6.42626	-0.203322	-0.0497285
YCR094W	CDC50	-0.348832	1.10167	0.388683	-1.26763	0.957473	0.314561
YCR095C	OCA4	-0.373285	-0.461128	NA	-0.113679	-0.707756	NA
YCR105W	ADH7	0.336003	0.189559	0.285549	-0.0225426	-0.176777	0.0462692
YDL001W	RMD1	-10.6724	-10.6777	-10.6817	-10.0112	-10.2761	-10.5976
YDL002C	NHP10	0.261765	-2.91869	-0.398507	1.88267	-3.14657	0.374361	yes
YDL003W	MCD1	0.802383	0.0641107	-0.403477	2.55657	1.83005	2.36345	yes
YDL005C	MED2	-0.037124	-1.14594	0.159325	0.660761	-0.496392	0.654302
YDL006W	PTC1	-0.500835	1.46382	0.20331	-1.35814	1.33431	-0.0896843
YDL008W	APC11	0.460074	0.232923	0.408435	0.54815	0.458585	0.781791
YDL010W	GRX6	0.880988	-1.61743	0.112216	0.330271	-2.05372	-0.0792958
YDL012C	#REF!	-2.01483	0.290944	-0.226791	-1.40383	-0.0645156	-0.744743
YDL015C	TSC13	0.371969	0.134458	-10.6817	0.432752	0.482099	-10.5976
YDL017W	CDC7	0.0890579	-1.25178	-0.227893	-0.126881	-1.17393	-0.168701
YDL018C	ERP3	-0.703759	0.223147	-0.154201	-1.04256	-0.330681	-0.624607
YDL019C	OSH2	1.1002	1.43334	0.243612	0.99188	1.46933	0.358209
YDL020C	RPN4	-0.20482	-0.457341	-1.67325	-0.14859	-1.33361	-1.62317
YDL021W	GPM2	-0.34712	0.525628	0.182508	-0.62321	0.467027	0.0659711
YDL022W	GPD1	-2.29412	-0.142939	-0.67075	-2.28069	-0.0122944	-0.893785
YDL025C	RTK1	0.182443	-0.358048	0.539305	-0.058486	-0.713882	0.381838
YDL027C	#REF!	0.184291	-0.153964	-0.393553	-0.0733615	-0.184596	-1.31338
YDL028C	MPS1	-1.00716	0.306382	0.0205569	-1.13723	0.257215	-0.0321988
YDL029W	ARP2	-2.08746	-2.18988	-2.96743	-1.93441	-2.28744	-3.16296
YDL030W	PRP9	0.306327	0.742831	0.495341	0.142525	0.89858	0.597967
YDL033C	SLM3	-0.297386	-0.673499	0.554337	-0.858942	-1.29884	0.142194
YDL036C	PUS9	0.74226	NA	0.96668	0.290269	NA	1.34015
YDL040C	NAT1	0.616195	-0.516965	0.462252	0.634052	-1.12382	0.238745
YDL042C	SIR2	-0.999524	0.374228	0.597145	-1.23868	0.583078	0.821631
YDL043C	PRP11	-0.0276677	0.12318	-0.429012	0.662965	0.136445	-0.878198
YDL044C	MTF2	-10.5656	-10.6398	-10.5821	-5.89212	-3.93734	-3.86227
YDL045C	FAD1	0.51183	0.411069	0.115173	0.544321	0.678799	0.203313
YDL045W-A	MRP10	-0.518873	-0.510301	-0.685911	-0.782409	-0.774287	-1.74584
YDL046W	NPC2	0.209453	0.143257	0.554337	-0.281607	0.506874	0.315302
YDL047W	SIT4	0.181664	0.285176	0.224461	-0.14859	0.563079	-0.431424
YDL048C	STP4	0.421652	0.649833	-0.416063	0.192121	1.23316	-1.20098
YDL052C	SLC1	-0.336759	0.875414	0.500007	-0.425422	1.02474	0.859922
YDL053C	PBP4	-0.866681	0.374169	0.147252	-2.25634	1.04072	0.19439	yes
YDL055C	PSA1	-2.92172	-2.76943	-1.81396	3.23602	1.88053	3.90305	yes
YDL056W	MBP1	-0.999524	0.0388072	-0.789352	-1.1166	0.200979	-0.39638
YDL057W	#REF!	0.385566	-0.751424	0.426193	0.310701	-0.471993	0.50963
YDL058W	USO1	0.718089	1.16151	-0.280646	0.758931	1.04861	-1.24502
YDL059C	RAD59	0.186803	0.0710135	0.230837	-0.159671	0.123568	0.555266
YDL060W	TSR1	0.0872668	-0.31224	-0.0488122	0.39841	-0.451918	-0.394769
YDL061C	RPS29B	-0.26637	-0.651108	-0.42859	1.12221	0.458404	1.01402
YDL063C	SYO1	-1.47521	-0.586284	-0.0441471	-2.62752	-0.336545	0.274318
YDL064W	UBC9	-0.776044	-0.625772	0.23644	-0.193224	-0.303913	0.68281
YDL065C	PEX19	0.222392	-0.545863	-0.241847	0.179832	-0.253757	-0.565541
YDL067C	COX9	0.0445239	-0.0204899	0.125217	-0.785922	-0.791667	0
YDL069C	CBS1	0.0324744	-0.865006	0.255486	0.172771	-1.3074	-0.0122993
YDL070W	BDF2	-1.76553	0.461192	-0.00131813	-3.45664	0.819932	-0.0506926
YDL072C	YET3	0.648939	0.10446	0.185601	0.762736	0.215729	0.132034
YDL074C	BRE1	-2.24817	NA	-1.39232	-1.5113	NA	-0.440573	yes
YDL076C	RXT3	-1.52014	0.166986	-0.411382	-1.56828	0.633019	-0.371175
YDL077C	VAM6	0.499377	0.475832	-0.201897	0.484628	0.0525505	-0.162959
YDL078C	MDH3	NA	0.766944	-0.120663	NA	0.937944	-0.505156
YDL080C	THI3	0.893629	0.116696	0.668709	1.08219	0.275584	0.442703
YDL082W	RPL13A	-0.968522	-1.25355	0.244618	-0.961379	-1.50463	0.469847
YDL084W	SUB2	-0.994706	-0.19189	-0.31208	-0.777608	-0.531291	-0.540949
YDL085C-A	#REF!	-0.260914	-0.0740933	-0.103305	0.394978	0.214726	-0.00980952
YDL087C	LUC7	0.609971	0.411416	0.33523	1.2627	0.842441	0.960268
YDL088C	ASM4	0.632867	1.05456	0.412918	0.392253	1.20343	0.136613
YDL089W	NUR1	0.665643	0.355974	0.659841	0.169175	0.05633	0.673626
YDL090C	RAM1	-3.17326	-0.506651	-0.367823	-3.85259	-0.154936	-0.432286
YDL091C	UBX3	-0.216071	0.106915	-1.47955	-0.302143	0.478763	-2.00513
YDL092W	SRP14	0.769812	0.742291	0.342671	0.867952	0.64882	0.628391
YDL095W	PMT1	-0.0781007	0.450919	-0.116576	-0.572435	0.319133	0.0516691
YDL097C	RPN6	-1.92172	-0.367163	-0.231203	-0.0410662	0.908146	1.38472	yes
YDL098C	SNU23	-0.67076	0.338918	0.298972	-0.143183	0.64942	0.838851
YDL099W	BUG1	-0.65701	NA	-0.130931	-1.5477	NA	-0.56004
YDL100C	GET3	0.551576	0.0192479	-0.0145661	0.299386	-0.438496	-0.0497285
YDL101C	DUN1	-0.134236	-0.438121	-0.46372	-0.147041	-0.373749	-0.436455
YDL103C	QRI1	0.256093	0.0970674	-0.809772	0.503487	0.0858194	-2.07795
YDL104C	QRI7	-10.5656	-0.0398801	0.427687	-5.81412	-0.144489	0.526647
YDL105W	NSE4	-0.698011	-0.889817	-0.189825	-0.407601	-1.32193	-0.00139728	yes
YDL106C	PHO2	-0.510296	-1.10646	-3.03525	-0.017652	-0.534077	-2.31338
YDL107W	MSS2	1.02641	-0.0718368	0.483274	1.00539	-0.154936	0.292732
YDL108W	KIN28	-0.614293	-0.393052	0.674656	0.451681	-0.269452	1.19073	yes
YDL109C	#REF!	-2.36101	-0.272378	-0.0218091	-2.96401	-0.51108	-0.32101
YDL110C	TMA17	-0.274407	0.134994	-0.22569	0.178745	0.161109	0.323397
YDL111C	RRP42	-0.385669	-0.235716	-0.399748	0.757335	-0.16124	0.284711
YDL112W	TRM3	0.437237	-0.183438	-0.178065	0.160749	-0.585433	-0.216282
YDL113C	ATG20	0.771036	0.784271	0.469339	0.554827	0.843465	0.213788
YDL115C	IWR1	-0.317651	0.61995	0.129525	-0.429051	0.596219	0.450721
YDL116W	NUP84	NA	0.188787	0.167727	NA	0.358687	-0.133041
YDL117W	CYK3	-0.134236	-0.975547	-0.430195	-0.396517	-0.612566	-0.111758
YDL119C	#REF!	0.0791187	0.0846624	-0.847207	-0.147041	0.520726	-1.32846
YDL120W	YFH1	0.81139	0.0467942	0.41174	-0.279908	0.110816	0.539404
YDL121C	#REF!	0.064822	0.367357	0.269607	-0.207096	0.709718	0.606984
YDL122W	UBP1	0.547953	0.372129	-0.0817648	0.597028	0.682428	-0.0267826
YDL123W	SNA4	-0.151807	-0.758856	0.715462	0.0695903	-2.59664	0.55976
YDL124W	#REF!	-0.120717	-0.153178	0.761784	0.436889	0.135387	0.933794	yes
YDL125C	HNT1	0.664639	-10.6777	-0.73331	0.91951	-10.2761	-0.873073
YDL126C	CDC48	-0.630766	0.250058	-0.697259	0.560525	1.18893	-1.58916	yes
YDL128W	VCX1	-0.740211	0.304561	-0.134783	-1.24636	0.391874	-0.0487651
YDL129W	#REF!	-0.333157	0.221294	-2.73665	-0.0121976	0.327192	-3.42076
YDL130W	RPP1B	-1.2618	-2.15195	-0.874783	-2.06769	-2.86696	-1.00737
YDL130W-A	STF1	-0.206927	0.796919	-0.407216	0.188252	0.814334	-0.744743
YDL131W	LYS21	-0.501249	0.0854927	0.116794	2.51576	2.22696	2.78328	yes
YDL132W	CDC53	-2.23915	-3.76943	-1.602	-2.95352	-3.82631	-2.24212
YDL133C-A	RPL41B	0.0949315	-0.194912	0.00394718	1.49805	0.958693	0.842763
YDL134C	PPH21	0.854074	0.17481	NA	1.29995	0.0956522	NA
YDL135C	RDI1	0.345065	-0.181386	0.202493	0.292203	-0.653423	0.29473
YDL136W	RPL35B	-1.54877	-1.01591	-0.67075	-2.14916	-1.00566	-0.886974
YDL137W	ARF2	0.358931	-0.590257	-0.277601	0.141058	-1.34243	-0.203124
YDL138W	RGT2	NA	-0.460974	0.110299	NA	-1.7723	-0.469593
YDL139C	SCM3	-10.6724	-10.6777	-10.6817	-10.0112	-10.2761	-10.5976
YDL140C	RPO21	-2.30819	-1.29106	0.0435669	4.19276	3.92374	6.38814	yes
YDL141W	BPL1	-0.0267669	0.60479	0.4275	0.154936	0.31259	0.505701	yes
YDL142C	CRD1	-0.122635	0.426969	0.206576	-0.524828	0.177023	-0.587414
YDL143W	CCT4	-10.6724	-10.6777	-10.6817	-10.0112	-10.2761	-5.4683
YDL144C	#REF!	-0.195981	-0.342877	0.440226	-0.515152	-0.0141952	0.318495
YDL145C	COP1	NA	-0.917831	-0.499283	NA	-1.18073	-0.527466
YDL146W	LDB17	0.00617451	0.0308634	0.0751765	-0.327337	-0.621199	-0.0818859
YDL147W	RPN5	-2.39565	-1.09097	-1.23341	-0.249869	-0.0714256	0.452512
YDL149W	ATG9	-0.103076	-0.653951	0.298972	-0.158164	-0.854982	0.225189
YDL150W	RPC53	1.2466	1.37458	0.594031	1.93654	1.75475	1.07574
YDL155W	CLB3	-1.57703	-0.261978	0.222957	-1.8214	-0.625073	0.423393
YDL156W	CMR1	-0.369786	-0.454925	0.0325679	-0.700614	-0.829041	0.0444647	yes
YDL157C	#REF!	0.715772	1.15908	0.435362	0.0864304	1.31891	0.217836
YDL159W	STE7	0.0998892	-0.193904	-0.0985949	0.267222	0.445829	-0.0769684
YDL160C	DHH1	-0.302828	-0.667891	-0.466145	0.314078	-1.13147	-0.821154
YDL161W	ENT1	-0.221214	0.457348	0.313383	-0.568284	0.605754	0.294956
YDL164C	CDC9	-0.552187	0.290227	-0.0920265	-1.32823	-0.0813676	-0.368768
YDL165W	CDC36	-0.587617	-0.944704	-0.759837	-0.8388	-1.0282	-1.30527
YDL166C	FAP7	-0.342783	0.424276	0.410088	-0.473332	0.371541	1.17074
YDL167C	NRP1	-0.917538	-0.70474	-0.0243592	-1.68031	-1.18866	-0.681708
YDL168W	SFA1	0.309855	0.507156	0.184056	0.261403	-0.0974596	0.117517
YDL170W	UGA3	0.314128	0.26186	-0.0910906	-0.2987	0.525584	-0.100733
YDL171C	GLT1	-0.408231	-0.131998	-0.092294	-0.57823	0.0761179	0.420843
YDL173W	PAR32	-0.0715832	-0.39927	0.630071	0.118056	-0.46716	0.464459
YDL174C	DLD1	-0.418373	0.190722	0.153414	-1.13131	0.406063	0.14771
YDL175C	AIR2	-0.396906	-0.75105	0.115694	0.467384	-0.632833	0.450721
YDL176W	#REF!	0.766458	0.0718741	0.343412	0.570949	0.0832467	0.0540849
YDL177C	#REF!	0.084131	-0.533061	0.0972208	-0.433798	-0.451166	-0.687694
YDL178W	DLD2	0.482909	-0.140944	-0.114536	0.474201	-0.854982	0.00611053
YDL181W	INH1	0.215782	-0.758679	-0.00849479	-0.120999	-0.672808	-0.216282	yes
YDL182W	LYS20	0.155711	-0.041095	0.146459	4.40715	2.70598	3.58729	yes
YDL184C	RPL41A	-0.314873	-1.26409	0.0187621	1.19273	-2.07155	0.684922
YDL185W	VMA1	0.493766	0.0658395	0.166889	0.636659	0.385305	-0.160465
YDL188C	PPH22	0.230461	-1.40139	-0.402233	-0.116602	-1.88076	-0.23058
YDL189W	RBS1	0.345065	-0.972681	-0.0763304	0.536006	-0.937344	-0.142779
YDL190C	UFD2	0.09798	-0.682691	-0.246752	0.353696	-1.08335	0.0230836
YDL192W	ARF1	-3.61714	-3.39232	-2.8615	-4.8413	-3.88381	-2.6907
YDL195W	SEC31	0.489966	-0.297259	-0.910188	0.926147	-0.967785	-0.687694
YDL197C	ASF2	0	-0.264092	0.281941	-0.340571	-1.15459	-0.152572
YDL201W	TRM8	0.508727	-0.0275654	0.554935	2.0021	1.45816	1.32425	yes
YDL202W	MRPL11	-0.824111	0.414811	-0.263599	-0.828426	0.427228	-0.811955
YDL203C	ACK1	-0.00176909	-0.391162	-0.995177	-0.753839	-0.607239	-1.59196
YDL204W	RTN2	-0.269413	0.0330868	0.0681918	-1.33175	0.109738	-1.14844
YDL205C	HEM3	0.244201	0.657671	0.570988	0.49061	1.10758	0.543243
YDL207W	GLE1	0.430189	0.016632	0.0814161	-0.356414	-0.0793634	0.15982
YDL209C	CWC2	-0.164699	0.271599	0.132104	-0.119532	0.502943	0.966548
YDL211C	#REF!	0.359976	0.185961	-0.248987	-0.131309	-0.412528	-1
YDL212W	SHR3	0.541286	-1.37394	0.202493	0.526962	-1.88811	-0.169227
YDL213C	NOP6	0.250902	0.491579	0.425539	1.08812	1.1585	0.866448
YDL215C	GDH2	-0.548304	-0.258813	0.0126802	-0.347669	-0.50794	-0.986562
YDL216C	RRI1	0.145228	-0.466116	0.57962	0.00134894	-0.293488	0.231462
YDL219W	DTD1	-0.219064	-0.420624	0.450593	-0.438165	-0.710836	0.328283
YDL220C	CDC13	-0.868294	-0.289702	0.377667	-1.32823	-1.02583	0.441332
YDL222C	FMP45	0.304139	-0.520373	0.00482287	0.34962	-0.689285	-0.255512
YDL225W	SHS1	0.365898	0.0795959	-0.0507605	0.754937	-0.238015	0.0634912
YDL226C	GCS1	0.556393	0.357767	0.315502	0.983833	0.635268	-0.0487651
YDL227C	HO	-3.71823	-10.6777	-10.6817	-5.10434	-10.2761	-10.5976
YDL228C	#REF!	-0.361007	-10.6398	-10.5821	-0.143183	-10.5812	-10.2021
YDL229W	SSB1	-0.310482	-1.81663	-10.6817	0.307316	-0.870983	-6.20527
YDL230W	PTP1	0.621774	0.896454	-0.328294	0.259882	0.740728	-0.242122
YDL232W	OST4	-10.5656	0.476551	-0.761963	-4.97458	0.386746	-1.16046
YDL233W	MFG1	-0.695213	0.300521	-0.580734	-0.814119	0.432122	-1.40122
YDL234C	GYP7	0.446516	-0.26939	0.779802	0.270703	-1.22356	1.10805
YDL235C	YPD1	-0.209923	0.185692	-0.197862	-0.365569	0.277505	0.379693
YDL236W	PHO13	0.399707	0.148034	-0.176859	1.35017	0.716106	0.204121	yes
YDL238C	GUD1	0.730587	-0.0195082	0.0118093	0.815321	-0.104948	0.101118
YDL240W	LRG1	-0.366364	0.807607	0.196373	-1.43003	1.27222	0.200885
YDL241W	#REF!	0.697717	-0.0248747	0.0368552	0.569031	-0.822854	-0.100733
YDR001C	NTH1	-0.13715	-0.112618	-0.52686	0.0166787	-0.23173	-0.451655
YDR003W	RCR2	0.28539	0.367234	0.471105	-0.329031	0.238978	0.172916
YDR004W	RAD57	-0.335558	-1.46987	-0.0763304	-0.76055	-1.94096	-0.619041
YDR005C	MAF1	-0.977197	0.7543	0.26742	-3.03395	0.855089	0.630029
YDR007W	TRP1	0.709382	0.768006	0.213898	0.746918	0.790032	0.124306
YDR009W	GAL3	0.27375	0.34326	0.0988621	0.610825	0.338585	-0.300671
YDR011W	SNQ2	0.323342	0.0476466	0.309844	0.807355	0.487088	0.463109
YDR012W	RPL4B	-0.314873	0.241144	0.464891	-0.0555773	0.316333	0.268919
YDR013W	PSF1	-0.709153	-1.03617	-0.0803048	-0.0355227	-0.926565	-0.113336
YDR014W	RAD61	-0.769539	0.116763	-0.329477	-0.864829	0.197698	-0.237783
YDR016C	DAD1	0.739344	0.235188	-0.278361	0.28225	-0.381528	-0.293731
YDR017C	KCS1	-0.987677	-0.194912	-1.03422	-2.56828	-0.0140296	-1.1505
YDR019C	GCV1	0.820823	0.32238	-0.497334	0.422777	0.363511	-0.844572
YDR020C	DAS2	-0.592598	0.209612	0.322493	-0.0410662	0.596842	0.51812
YDR021W	FAL1	-0.187283	0.088978	0.390838	0.22682	0.861743	0.6889	yes
YDR022C	ATG31	0.0757675	0.597823	0.0419833	-0.140863	0.903785	-0.206343
YDR025W	RPS11A	0.548558	-0.27684	0.166945	0.473596	-0.260709	-0.231265
YDR026C	NSI1	-0.33927	0.195724	0.844332	-0.587061	-0.936274	0.768735
YDR027C	VPS54	0.165741	0.425623	0.105234	-0.830825	0.457033	-0.261076
YDR028C	REG1	-0.464191	0.482152	0.203256	-0.511381	0.530425	-0.0809021
YDR032C	PST2	0.591137	0.748224	0.308122	0.0659482	0.579301	0.257308
YDR033W	MRH1	0.350636	0.225409	0.0222259	0.0986034	-0.294557	-0.235643
YDR034C	LYS14	-5.02857	-10.6777	-4.61559	-5.48767	-5.88381	-4.05843
YDR034W-B	#REF!	0.336797	0.228258	-0.427324	-0.835634	0.0517946	-0.51038
YDR035W	ARO3	-0.213535	0.307844	0.0751765	0.185881	1.00798	1.01583
YDR036C	EHD3	0.78812	1.22284	-0.0141859	0.748525	0.874127	-0.210602
YDR038C	ENA5	-0.257239	-0.125079	0.300501	-0.797604	-0.116655	0.448928
YDR039C	ENA2	-0.0888319	-0.476143	-1.19628	-0.0272472	-0.540911	-1.81411
YDR040C	ENA1	-0.399415	-0.0765966	0.359639	-0.536525	-0.395086	0.430871
YDR041W	RSM10	0.913191	0.257296	-0.255712	0.730744	-0.20399	-0.873449
YDR043C	NRG1	0.578443	-0.0426715	0.508632	0.388134	-0.665321	0.500049
YDR044W	HEM13	-0.0053138	-0.171908	0.460429	0.879037	-0.958712	1.16355
YDR046C	BAP3	-0.794089	-0.22194	0.432576	-1.28397	-0.206161	0.222042
YDR047W	HEM12	0.926275	-0.988741	0.585903	0.935133	-0.761022	0.386591
YDR049W	VMS1	-0.431152	0.750376	-0.548719	0.349465	0.757536	-0.132003
YDR050C	TPI1	-0.139096	0.367357	-0.773285	2.18783	1.59617	-0.665372	yes
YDR051C	DET1	NA	0.122371	0.342769	NA	0.540859	0.16977
YDR052C	DBF4	-0.863461	-0.0602522	-0.0632922	-2.78241	0.151188	0.200885
YDR054C	CDC34	-0.849616	0.139926	-0.230099	0.379861	0.584335	0.882685
YDR055W	PST1	-1.59116	-0.551005	-0.765158	-1.77664	-0.726332	-1.22484
YDR056C	#REF!	-0.114962	-0.183864	0.437912	-0.383693	-0.164989	0.377544
YDR059C	UBC5	0.33039	-1.00529	0.206304	-0.0225426	-1.0425	0.644396
YDR060W	MAK21	-0.709153	-0.260415	0.00469781	-0.23391	0.161951	0.109624
YDR061W	#REF!	-0.426027	-0.513088	0.0946966	-1.16723	-0.717014	-0.386741
YDR062W	LCB2	-0.0303736	-0.00441057	-0.0532321	-0.698344	-0.308898	-0.257737
YDR063W	AIM7	-0.136171	-0.0880846	0.57962	-0.285613	0.0344291	0.729352
YDR065W	RRG1	-0.36468	-0.888249	-0.151689	-0.405621	-1.16124	0.087895
YDR066C	RTR2	0.0109062	0.604571	0.125217	0.346284	0.661378	-0.0857799
YDR067C	OCA6	-1.81134	-1.59026	0.32955	-4.51937	-2.49476	0.4509
YDR068W	DOS2	-0.78258	-0.679791	0.491999	-1.13723	-1.0401	0.638654
YDR069C	DOA4	-0.575474	-0.340585	-0.241179	-0.667583	-0.637221	-0.916722
YDR070C	FMP16	0.0891259	-0.315776	0.118413	-0.38005	-1.78828	0.154794
YDR071C	PAA1	-1.60903	-0.469485	-0.128048	-1.92908	-0.488222	-0.164002
YDR072C	IPT1	0.760851	0.24895	-0.095307	0.821361	0.137332	-0.651377
YDR073W	SNF11	-0.304659	0.182778	0.175248	-1.31721	0.0390192	0.580055
YDR074W	TPS2	0.0210616	0.288786	0.0445405	0.388585	0.918017	0.00974327
YDR075W	PPH3	-0.206859	0.241144	0.494495	-0.108852	0.0161972	0.317545
YDR076W	RAD55	0.106847	-0.492588	-0.766759	0.490623	-0.955492	-1.25668
YDR077W	SED1	0.983725	0.728714	0.247581	0.807548	0.584963	-0.137381
YDR079C-A	TFB5	-0.397465	-1.17787	-0.0734228	-0.147041	-1.2621	-0.263314
YDR079W	PET100	0.574613	0.604571	0.20331	-0.161179	0.54098	0.223092
YDR080W	VPS41	0.671034	0.600402	0.0858566	0.46836	0.472725	-0.247928
YDR081C	PDC2	0.129283	-3.03386	-2.64825	0.0602351	-3.52124	-2.7647
YDR083W	RRP8	-0.392815	0.101179	0.476932	-0.593375	0.206684	0.843801
YDR084C	TVP23	1.00996	1.22671	-0.0713778	1.15954	0.923618	-0.281771
YDR087C	RRP1	0.0924462	-2.57969	0.00307097	0.86759	-1.76437	0.331671
YDR088C	SLU7	0.33039	0.31946	-0.320831	0.607158	0.74555	-0.511451
YDR089W	#REF!	0.778163	0.564778	-0.517399	0.762117	0.523398	-0.063852
YDR090C	#REF!	-0.504882	0.588425	0.198398	-1.31385	0.448087	-0.0435141
YDR091C	RLI1	-1.37823	-1.88491	-1.41724	-1.52289	-2.69246	-1.36923
YDR092W	UBC13	-0.651445	1.17129	0.424231	-0.0168738	1.66749	0.771465
YDR093W	DNF2	-10.6724	-10.6777	-10.6817	-10.0112	-6.18866	-10.5976
YDR096W	GIS1	0.41884	-0.688508	-0.316527	0.900127	-0.977574	0.249087
YDR097C	MSH6	-0.525288	0.282792	0.040825	0.770053	1.01546	1.3022
YDR098C	GRX3	0.476051	0.83255	0.339302	1.31857	1.51463	0.67037
YDR099W	BMH2	-0.763062	-0.0737389	0.412918	0.294406	0.283759	1.50005
YDR100W	TVP15	-3.90424	0.0970674	0.159887	-6.31079	0.188421	0.112358
YDR101C	ARX1	-0.889621	-0.110362	-0.747671	1.03599	1.26664	1.15102
YDR103W	STE5	-1.35856	0.449658	0.277393	-1.36508	0.52863	0.410745
YDR105C	TMS1	-0.190539	0.732528	0.00188096	-0.153654	0.758649	-0.262545
YDR108W	TRS85	-0.200349	0.0906772	0.288993	-0.272512	0.0149892	0.554432
YDR109C	#REF!	0.429482	0.429657	-0.0793102	0.366314	0.605533	-0.49304
YDR110W	FOB1	0.302706	0.413054	-0.0405291	-0.372791	0.330281	0.382553
YDR111C	ALT2	0.238553	-0.39781	0.0653164	0.311907	-1.28888	0.427233
YDR115W	#REF!	-0.87558	-3.74498	-4.74925	-0.772027	-4.55883	-5.11466
YDR116C	MRPL1	0.839031	0.805222	-0.850823	0.2222	0.663758	-0.827084
YDR117C	TMA64	0.209453	0.0510512	-0.560144	-0.553846	-0.2705	-1.24224
YDR118W	APC4	0.325446	-1.26475	1.08541	-0.196313	-1.26832	1.17617
YDR120C	TRM1	-0.0439777	0.441025	NA	0.482918	0.144166	NA
YDR121W	DPB4	-0.285968	NA	-0.197358	1.24002	NA	1.11246	yes
YDR122W	KIN1	-2.20482	0.520725	-0.0225737	-4.17834	0.556766	-0.305265
YDR123C	INO2	0.338304	0.016632	0.277393	0.569131	0.133903	0.353424
YDR124W	#REF!	0.242582	0.313676	-0.0822961	1.0556	0.625203	0.462323	yes
YDR127W	ARO1	0.268622	-0.841669	0.32605	0.542402	-0.586126	0.62762
YDR128W	MTC5	-9.56558	0.379103	0.496676	-10.062	0.169506	0.276646
YDR129C	SAC6	0.38489	0.115884	0.470607	-0.0908744	0.105419	0.400298
YDR132C	#REF!	-0.583637	-0.275774	-1.30013	-1.22987	-0.457542	-2.42766
YDR135C	YCF1	0.275986	0.643874	0.626092	-0.614963	0.498284	0.0936451
YDR137W	RGP1	0.216318	0.571394	0.391125	-0.874236	0.561504	0.503075
YDR138W	HPR1	-0.540568	0.180261	-1.31754	0.661198	1.61831	-1.43268	yes
YDR139C	RUB1	-0.00715742	-0.449968	-0.343737	-0.232323	-0.85328	-0.289234
YDR140W	MTQ2	0.67938	NA	0.567605	0.971377	NA	0.56854
YDR141C	DOP1	0.24419	0.978593	-1.70256	-0.816493	0.950668	-2.55107
YDR142C	PEX7	1.02594	0.0432017	-0.1496	1.0373	-0.246927	-0.494765
YDR143C	SAN1	0.645093	0.458897	0.213086	0.469335	0.276003	0.133267
YDR144C	MKC7	0.984893	0.327905	0.0144205	0.796933	0.0322146	-0.322627
YDR145W	TAF12	-0.150893	0.400497	0.417153	0.110381	0.522743	0.936148
YDR146C	SWI5	-0.430442	0.385675	-0.239771	-0.342342	0.58341	-0.3308
YDR147W	EKI1	0.278343	0.150556	-0.285226	0.0723802	0.143313	-0.447236
YDR148C	KGD2	-0.0249669	0.55949	0.436615	-0.0864148	-1.1037	0.0489717
YDR150W	NUM1	-0.00708942	0.0754971	0.80566	-0.170449	-0.756488	0.618553
YDR152W	GIR2	-0.375509	0.275022	0.423576	-0.931742	0.630766	0.358063
YDR153C	ENT5	-0.148781	1.1201	0.292071	-0.410994	1.26429	0.402429
YDR155C	CPR1	-0.208901	0.0519011	-0.14155	1.13279	2.06595	1.24083	yes
YDR156W	RPA14	-0.741688	0.393072	0.114362	-1.4682	0.474583	-0.126928
YDR158W	HOM2	0.214141	-2.31336	-0.274941	2.30209	-1.23913	1.02489
YDR159W	SAC3	0.510569	1.04496	0.436754	0.331344	0.825536	0.0362809
YDR161W	#REF!	-0.732846	-0.460974	-0.402067	0.345225	-0.0691101	-0.407762	yes
YDR162C	NBP2	0.179324	0.141661	-0.270167	0.474602	0.495365	-0.137131
YDR164C	SEC1	-0.651193	-0.402583	-0.701028	-1.11953	-0.794931	-1.26843
YDR165W	TRM82	0.123614	-0.473148	-0.829929	1.56997	0.485427	0.349319
YDR166C	SEC5	-0.00333571	1.42899	0.687569	-0.020387	1.17327	0.382839
YDR167W	TAF10	-0.488763	-0.547036	-0.985952	-0.205621	-0.104454	-0.862274
YDR168W	CDC37	-0.218126	-0.0374747	0.058103	-0.728139	-0.381307	-0.565541
YDR169C	STB3	-0.110251	1.30894	0.829899	-0.183995	1.65062	0.91357
YDR170C	SEC7	1.01185	0.213517	0.147479	1.49972	-0.00282789	-0.39316
YDR170W-A	#N/A	-10.6724	-10.6777	-10.6817	-10.0112	-10.2761	-8.01262
YDR171W	HSP42	-0.462972	0.207977	NA	-0.278212	0.0322146	NA
YDR172W	SUP35	-0.213535	0.458897	0.664005	-0.0190189	0.708242	0.353424	yes
YDR173C	ARG82	1.08861	1.31003	-10.5821	1.11724	1.11141	-5.24793
YDR174W	HMO1	-0.789145	0.329594	-0.0429832	1.83958	1.24217	0.861271
YDR175C	RSM24	-0.261797	0.354561	-0.0803048	-1.03414	0.421614	-0.951825
YDR176W	NGG1	-0.0912248	0.024453	0.107856	0.439984	0.771	0.4317	yes
YDR177W	UBC1	-0.847902	-0.161023	-0.28867	0.172771	0.186984	-0.023459
YDR178W	SDH4	0.51324	0.849051	-0.48148	0.16557	0.483542	-1.3724
YDR179C	CSN9	0.0926333	-0.132989	0.15595	-0.608776	0.055424	-0.262545
YDR179W-A	#REF!	0.0724085	-0.157101	0.198671	-0.760929	0.0637256	0.0480714
YDR180W	SCC2	-0.245906	-0.7299	-0.201681	-0.125408	-0.392612	0.0469896
YDR181C	SAS4	-0.0052453	0.500398	0.249165	0.195342	0.525362	0.301702
YDR182W	CDC1	0.208689	0.122371	0.409758	0.323046	0.0253718	0.161469
YDR183W	PLP1	0.434792	0.110183	NA	0.0709218	0.287072	NA
YDR184C	ATC1	0.291625	-0.325776	0.377136	-0.138719	-0.557446	0.0410502
YDR185C	UPS3	-0.0293309	0.490778	0.0435669	-0.648418	0.32569	-0.420764
YDR186C	#REF!	-0.912537	0.210262	-1.04505	-1.95053	-0.641313	-1.02963
YDR189W	SLY1	0.310171	0.182778	-0.261341	-0.292208	-0.0615643	-0.420764
YDR190C	RVB1	-0.0449595	-0.981581	-0.681275	2.85084	0.868464	1.73819	yes
YDR191W	HST4	0.00176693	0.330709	0.469339	0.151164	-0.0187366	0.505045
YDR194C	MSS116	1.05922	0.653104	0.381477	1.17815	0.630688	0.201953
YDR195W	REF2	0.135728	0.188344	-0.204931	2.40173	1.62031	1.79329	yes
YDR196C	CAB5	0.714032	0.53638	0.108729	0.716852	0.491602	0.396859
YDR197W	CBS2	0.0614374	-0.968636	-0.171903	-0.00419999	-1	-0.564164
YDR198C	RKM2	-0.735855	-0.421835	-0.17913	-0.661167	-1.57277	-0.167325
YDR200C	VPS64	0.561126	-0.51051	0.385805	-0.302158	-0.798202	0.265482
YDR201W	SPC19	0.0997578	0.303455	-0.322399	0.0333509	-0.0953713	-0.202124
YDR202C	RAV2	-0.171583	-0.548437	0.0487925	-0.616765	-0.976916	0.106317
YDR205W	MSC2	0.396353	-0.332314	-0.440886	0.198226	-0.833181	-0.84437
YDR207C	UME6	0.136539	0.359141	0.210865	0.426525	0.49206	0.642011	yes
YDR210W	#REF!	0.987571	0.189137	0.335976	0.777158	-0.0923562	0.183739
YDR211W	GCD6	-0.0846478	0.0079052	-0.520546	-0.295265	-0.144267	-0.990257
YDR213W	UPC2	-0.121599	-0.746491	0.792354	-0.318895	-0.47137	0.523242
YDR214W	AHA1	-0.330351	-0.350167	-0.213054	0.274175	0.365927	0.476554
YDR216W	ADR1	-0.530318	0.564264	-0.148348	-0.966833	1.0891	-0.255512
YDR217C	RAD9	-0.290882	0.410406	-0.0270416	1.09403	1.22223	1.26078	yes
YDR219C	MFB1	0.07014	-0.553657	-0.565334	-0.867289	-0.796566	-0.414221
YDR221W	GTB1	0.618677	0.377712	0.0481251	0.384003	0.35249	-0.21202
YDR222W	#REF!	-0.561358	-0.565651	0.198398	-1.37905	-0.258146	-0.286244
YDR224C_1	HTB1_1	-3.78945	-5.01663	-6.69673	5.84903	3.6331	2.50001	yes
YDR224C_2	HTB1_2	-3.50459	-4.89796	-6.5545	5.83818	3.55383	2.45541	yes
YDR224C_3	HTB1_3	-4.06018	-5.83144	-6.77479	4.80153	2.57407	1.72337	yes
YDR226W	ADK1	-0.0467165	0.331409	-0.627752	1.87142	1.47416	0.44544	yes
YDR227W	SIR4	0.321928	0.290947	0.0377112	-0.0731179	0.486258	-0.445302
YDR228C	PCF11	-0.376656	-0.121214	0.353809	2.29626	1.6221	2.5927	yes
YDR229W	IVY1	0.577805	0.735247	1.11091	0.148625	0.463876	0.887989
YDR231C	COX20	0.399707	-1.78898	0.118413	0.13088	-1.47522	-0.0671807
YDR232W	HEM1	0.654195	0.112588	0.171075	0.110381	-0.197496	-0.262545
YDR233C	RTN1	-10.6724	-10.6777	-10.6817	-10.0112	-5.63227	-10.5976
YDR234W	LYS4	0.000883734	0.0510512	-0.436125	-0.197446	0.370434	-0.909337
YDR235W	PRP42	-0.395138	-0.99824	-0.0360192	0.166192	-0.0789077	1.11623	yes
YDR236C	FMN1	-0.0321804	0.188014	0.115173	-0.535494	0.136445	0.393935
YDR238C	SEC26	0.553987	-0.460974	-0.46372	0.537595	-1.13147	-0.730308
YDR239C	#REF!	-0.107323	-0.410933	-0.285073	-1.08939	-1.41504	-0.561413
YDR240C	SNU56	0.0426767	0.360911	-0.213636	0.983031	0.786214	0.541028	yes
YDR243C	PRP28	0.682375	-0.489131	-0.43375	1.40557	-0.764372	-0.0267826
YDR244W	PEX5	0.278859	0.307411	0.364082	0.569031	0.149091	0.358063
YDR245W	MNN10	0.434138	-0.0676176	-0.498042	0.352907	-0.295985	0.00139593
YDR246W	TRS23	0.0495283	-1.81353	0.639123	-0.167306	-1.18601	0.620976
YDR247W	VHS1	1.22924	0.437023	0.204944	0.862766	0.639178	-0.0805903
YDR248C	#REF!	0.382059	0.499119	0.647878	0.055597	0.568547	0.730091
YDR250C	#REF!	0.782043	0.158679	-0.0381435	0.516327	-0.30043	-0.757109
YDR251W	PAM1	0.474143	NA	0.436615	-0.165737	NA	0.118375
YDR252W	BTT1	-0.898467	-0.213528	-0.0132358	-0.584288	-0.609657	0.248056
YDR253C	MET32	-0.0339894	-0.926176	0.435316	-0.26976	-0.567041	0.211377
YDR254W	CHL4	0.35403	-0.251776	0.187696	0.340966	-0.523209	0.61965
YDR256C	CTA1	-0.614293	-0.0642536	-0.963756	-1.02862	0.0841353	-0.75918
YDR257C	RKM4	-0.503532	-1.15598	0.199218	0.244016	-0.294643	1.18266	yes
YDR258C	HSP78	-10.6724	-10.6777	-10.6817	-10.0112	-6.46877	-6.34966
YDR259C	YAP6	-1.33436	0.724342	0.0999748	-1.76284	0.753631	0.135498
YDR261C	EXG2	-0.0949965	0.261125	NA	-0.122484	0.347757	NA
YDR262W	#REF!	0.586707	0.333904	0.440226	0.604178	-0.112577	0.282699
YDR264C	AKR1	-0.157248	0.0510781	0.453344	-0.629504	0.15858	0.330232
YDR266C	HEL2	-0.624531	0.107561	0.304317	1.21582	0.847683	1.36631	yes
YDR267C	CIA1	0.146089	0.909992	0.871643	-0.724424	0.914155	0.987701
YDR268W	MSW1	0.824591	0.710041	0.0590066	0.0864304	0.627643	-0.696312
YDR272W	GLO2	0.212508	-0.142444	0.289147	0.764383	-0.382823	0.587908
YDR275W	BSC2	-0.259516	-0.587225	0.116563	-0.443661	-0.346383	-0.0409919
YDR276C	PMP3	0.24419	-0.491316	-0.607727	-0.225996	-1.33803	-0.620923
YDR277C	MTH1	0.10483	0.678732	-0.208987	-1.22987	0.678799	-0.104732
YDR279W	RNH202	0.193478	-0.242118	-0.109451	0.883398	0.161951	0.19662
YDR280W	RRP45	-0.129908	-1.00862	0.153414	1.01276	-0.476602	0.903785
YDR283C	GCN2	-0.0697231	1.0126	0.61753	-0.742374	0.975305	0.392201
YDR284C	DPP1	0.118294	0.0049647	0.290533	-0.785922	-0.0266117	0.119804
YDR285W	ZIP1	0.699896	-0.170916	-0.0324215	0.635331	-0.84986	0.0924109
YDR288W	NSE3	-0.667733	-0.269105	0.0508532	-0.0634557	-0.0537236	0.216783
YDR289C	RTT103	0.115477	0.0838316	-0.0678882	3.19579	2.90207	1.98291	yes
YDR291W	HRQ1	-0.707597	-0.879905	-0.138162	-0.503625	-0.741997	0.479115
YDR292C	SRP101	-2.27155	0.34326	-0.309901	-4.12858	0.259151	-0.775813
YDR293C	SSD1	0.173065	0.513957	-0.163024	-0.881944	0.420843	-0.0613398
YDR294C	DPL1	0.790588	0.305274	0.260837	0.639824	0.0880102	0.319785
YDR295C	HDA2	-0.10542	-0.0852626	0.24832	0.0881206	-0.189988	0.313056
YDR296W	MHR1	-0.280176	-0.679791	-0.115556	-0.700102	-0.551913	-0.290732
YDR297W	SUR2	-1.23242	0.167562	0.21714	-1.24826	-0.0151465	0.48962
YDR298C	ATP5	0.431518	-0.655352	-0.0957762	0.13852	-1.27894	0.0818931
YDR299W	BFR2	-0.797394	-0.594033	-0.219102	-0.842878	-0.143449	-0.289234
YDR300C	PRO1	0.541286	0.552301	0.0773783	1.45179	1.48001	1.0162
YDR301W	CFT1	-2.3237	0.760552	0.00744675	-3.21681	2.25306	1.03949	yes
YDR302W	GPI11	-0.63632	0.00856469	-0.0912911	-1.26438	0.0307464	-0.240674
YDR303C	RSC3	0.166778	0.714598	0.583937	1.48063	1.99796	1.48056	yes
YDR305C	HNT2	0.782388	0.185692	-0.340715	0.218793	0.584187	-0.476054
YDR307W	PMT7	0.554589	0.438624	-0.159096	0.63353	0.622477	-0.0220478
YDR308C	SRB7	-0.614434	0.616327	-0.70583	-3.36737	0.846056	-0.854436
YDR309C	GIC2	0.164043	0.913356	0.44369	0.318415	0.938436	0.477356
YDR310C	SUM1	-10.5656	-2.62298	-1.0199	-4.85259	-2.99624	-0.75918	yes
YDR311W	TFB1	-10.5656	-10.6398	-10.5821	-5.66973	-6.41128	-6.0322	yes
YDR312W	SSF2	0.371969	-1.03928	0.0187621	0.481627	-1.40885	0.0217159
YDR313C	PIB1	-0.182577	0.0235868	0.020495	-0.801774	0.213724	-0.0173285
YDR314C	RAD34	-0.550163	0.412775	-0.432395	-0.619103	0.128745	-0.508637
YDR316W	OMS1	1.06605	-0.842131	0.0955777	0.988483	-0.97387	-0.755041
YDR318W	MCM21	0.0622843	0.739078	0.364764	0.057551	0.995339	-0.00326244
YDR319C	YFT2	-0.0531224	0.250799	-10.6817	-0.283307	0.253306	-10.5976
YDR320C	SWA2	0.215557	0.0425246	0.893862	-0.452807	-0.0389144	0.677956
YDR320C-A	DAD4	-0.147726	-0.722421	0.0325679	-0.0578257	-0.756242	0.00244732
YDR322C-A	TIM11	-0.621216	-1.42269	0.416354	-0.939765	-1.25932	0.480564
YDR322W	MRPL35	0.216318	-0.252504	0.190997	-0.184679	-0.300276	0.184592
YDR323C	PEP7	-0.307012	-0.611887	-0.290971	-0.663302	-0.336837	-0.884711
YDR324C	UTP4	-0.802366	-0.942825	-1.50266	-0.134268	-0.778684	-2.71027
YDR325W	YCG1	-0.0647363	-0.780258	-0.545968	-0.211859	-0.34878	-0.607799
YDR326C	YSP2	-0.259516	0.395006	-4.43239	-0.940513	0.40108	-2.7675
YDR329C	PEX3	-1.08934	-0.359177	-0.567935	-0.864022	-1.00233	-2.83604
YDR330W	UBX5	0.540679	0.475832	-0.0910906	0.0762356	-0.0187366	0.202504
YDR331W	GPI8	-0.145618	0.217411	0.0635165	-0.245063	0.234183	-0.0767104
YDR332W	IRC3	0.380597	-0.39424	-0.256837	-0.317212	-0.687899	-0.0122993
YDR333C	RQC1	0.552782	0.284453	-0.633191	0.375713	0.536855	-1.09376
YDR334W	SWR1	0.0692329	0.157058	0.179409	0.314079	0.0814678	0.573486
YDR335W	MSN5	-1.14141	-0.0651994	-0.189825	-0.548319	0.172852	0.115289
YDR337W	MRPS28	0.392991	-0.586284	-0.0486825	-0.0819688	-0.6197	-0.132021
YDR338C	#REF!	0.623917	0.73485	0.511232	0.766028	0.704729	0.172251
YDR341C	#REF!	-10.6724	-10.6777	-10.6817	-10.0112	-5.06667	-10.5976
YDR342C	HXT7	0.626098	-0.775607	-0.389849	0.240593	-0.942765	-0.666848
YDR345C	HXT3	0.161491	0.618184	0.689321	-0.842878	0.522743	0.802799
YDR346C	SVF1	-0.0931094	0.121562	0.341384	0.758611	1.09347	0.683763
YDR347W	MRP1	-0.32702	-0.584963	-0.925121	-0.591267	-2.65407	-1.60041
YDR348C	PAL1	1.04683	1.34534	0.420673	1.24572	1.2682	0.406131
YDR349C	YPS7	NA	0.504228	0.343412	NA	0.351014	0.410745
YDR352W	YPQ2	-0.566988	-0.229342	-0.0285127	-1.89714	-0.459667	-0.00859846
YDR353W	TRR1	-0.835957	-0.934161	-0.423532	2.76708	1.8138	2.78336	yes
YDR354W	TRP4	-0.626666	-2.07039	-0.320831	-0.945138	-2.71388	-0.208494
YDR356W	SPC110	0.4157	-0.390007	0.140096	0.148644	-0.218133	0.335366
YDR357C	CNL1	0.228441	0.445108	0.302029	-0.153246	0.305076	0.0471706
YDR358W	GGA1	0.942712	0.112588	-0.707161	0.677734	0.191114	-0.842374
YDR361C	BCP1	-0.682321	-1.85754	-2.30664	0.216389	-1.58264	-3.02773	yes
YDR362C	TFC6	0.319805	0.326501	1.0205	-0.145494	0.254282	0.858254
YDR363W	ESC2	-0.303919	0.0122783	-0.374477	0.222392	0.240561	-0.42641
YDR363W-A	SEM1	-0.52014	-0.450104	-0.60086	0.283393	-0.0341413	-0.00793589
YDR364C	CDC40	0.428068	0.650226	0.076962	0.373624	0.855511	0.00732954
YDR365C	ESF1	-0.386913	-0.0823292	-0.00282604	-0.379052	-0.17181	-0.277311
YDR367W	KEI1	-0.226842	-1.27785	0.0902834	-0.802303	-1.37175	0.126551
YDR368W	YPR1	-0.0052453	0.292422	0.260208	0.554503	0.716289	0.904439
YDR369C	XRS2	-0.251561	-0.0890461	0.286681	-0.48273	-0.197496	-0.0922932
YDR370C	DXO1	0.882643	-0.497811	-0.238734	1.02426	-0.358752	-0.408998
YDR371W	CTS2	0.922262	1.30162	-0.663279	0.521977	1.00564	-1.50864
YDR372C	VPS74	0.468533	-1.4774	-0.184467	0.125306	-1.31207	-1.11201
YDR373W	FRQ1	0.403089	-0.104518	-0.0783162	0.438796	0.125295	-0.336391
YDR375C	BCS1	0.533112	0.686637	0.262564	0.410645	0.070748	0.0901978
YDR376W	ARH1	0.482393	-0.0447244	0.220697	0.315202	0.0770224	0.229756
YDR377W	ATP17	0.468533	0.695039	0.263348	0.106626	1.00751	-0.330219
YDR379C-A	#REF!	0.618677	-1.22616	-0.532293	0.242876	-2.47268	-0.784271
YDR379W	RGA2	-0.620134	0.0022588	0.402276	-1.40741	-0.168631	-0.536788
YDR380W	ARO10	-0.210227	0.89451	0.206576	0.378823	1.1253	0.583329
YDR382W	RPP2B	-2.5639	-2.27258	-2.11182	-2.8413	-1.82491	-2.43772
YDR384C	ATO3	0.545558	-0.32918	-0.216913	0.115373	-0.882496	-0.277311
YDR385W	EFT2	-0.202784	0.214823	-0.327428	1.69441	1.64237	0.584186
YDR386W	MUS81	-0.832563	-0.263668	-0.0763304	-0.452867	-0.192107	0.191267
YDR388W	RVS167	-0.0312767	-0.171908	0.689554	-0.843809	-0.320474	1.04987
YDR389W	SAC7	0.788671	-0.48371	0.27972	0.41166	-0.858393	-0.00736697
YDR390C	UBA2	0.346563	-0.216677	0.353023	2.06143	0.896052	1.78194
YDR391C	#REF!	0.357006	0.575133	-0.0304337	-0.191681	0.609241	-0.233457
YDR392W	SPT3	-1.01483	-0.0823292	-0.297896	-0.0578257	-0.139294	-0.0857799
YDR393W	SHE9	0.841158	0.528252	0.142372	0.433809	0.0841353	-0.275828
YDR395W	SXM1	0.304016	0.642137	-0.586375	2.01677	1.34101	0.307651
YDR397C	NCB2	0.0683253	0.478499	0.295142	2.18023	1.83216	2.2181	yes
YDR398W	UTP5	0.806743	0.487557	0.431878	1.27669	0.603675	0.665155
YDR399W	HPT1	-1.10001	-1.18447	-10.5821	1.28447	0.475437	-10.2021	yes
YDR400W	URH1	NA	-0.835369	0.613517	NA	0.0310764	0.522003
YDR404C	RPB7	-1.016	-0.485427	0.192535	4.50046	3.60547	4.7063	yes
YDR405W	MRP20	0.692988	0.746609	0.12349	0.092772	0.224543	0.0434289
YDR407C	TRS120	0.362374	0.0771679	0.225964	-0.0953479	0.167855	0.00603931
YDR408C	ADE8	0.603117	0.196493	0.553738	0.971766	0.529619	0.531696
YDR409W	SIZ1	0.110573	0.0493499	0.763855	0.492598	0.191481	0.832866
YDR410C	STE14	0.671034	1.64272	0.689905	0.0915059	1.87078	0.965921
YDR411C	DFM1	-0.264082	-0.493861	-0.123735	-0.902175	-0.222549	0.0924969
YDR412W	RRP17	0.650066	0.233672	0.587449	0.88813	0.23464	0.474546
YDR416W	SYF1	-0.708084	0.332808	-0.511753	-1.32123	0.507692	-0.826098
YDR418W	RPL12B	0.210855	0.758951	-0.286373	0.619192	0.880279	-0.515623
YDR419W	RAD30	-0.0053138	0.257445	-0.78686	0.0152962	0.197581	-1.03153
YDR420W	HKR1	0.398366	-0.000881035	0.319027	0.18476	-0.360245	0.479896
YDR421W	ARO80	0.230461	-0.308876	0.447145	-0.0108372	-0.588262	0.290731
YDR422C	SIP1	0.35479	0.0079052	0.451465	0.0139123	-2.02346	0.448173
YDR423C	CAD1	0.281044	-0.156119	-0.128048	-0.439475	-0.951944	0.0498714
YDR424C	DYN2	-0.235714	-0.157101	0.29417	-0.31426	-0.155887	0.0272084
YDR425W	SNX41	0.117923	0.595493	0.26742	-0.422513	0.550424	0.207351
YDR427W	RPN9	-0.000476058	-0.217728	-0.0237213	-0.110761	-0.477913	-0.339486
YDR430C	CYM1	-0.16364	0.206451	-0.0495912	-0.871676	-0.142982	-0.262197
YDR432W	NPL3	-0.210946	-1.27898	-0.279732	3.52854	1.71964	2.97795	yes
YDR434W	GPI17	0.555955	-0.0880846	-10.5821	0.384003	-0.274	-10.2021
YDR436W	PPZ2	-0.0878199	0.100831	0.0196288	-0.449178	-0.17181	-0.503419
YDR437W	GPI19	0.681756	0.0838681	-0.313015	0.248567	-0.177123	-1.12264
YDR439W	LRS4	-0.457054	0.73579	0.126942	-0.373796	0.789487	0.352465
YDR440W	DOT1	0.116293	-0.0204012	0.730363	0.817703	-0.0605914	0.950271
YDR441C	APT2	0.0949315	0.112629	-0.864694	-0.409456	0.487918	-2.05069
YDR443C	SSN2	-0.301136	-1.11036	-4.43239	-0.909761	-0.60249	-3.24793
YDR444W	#REF!	0.589082	-0.283257	0.0118093	0.460448	-0.364732	-0.6922
YDR447C	RPS17B	-0.710976	-0.669291	0.297033	-1.58077	-0.990722	0.000465461
YDR448W	ADA2	-0.157711	0.15517	-0.687324	-0.0790125	0.593469	-0.531498
YDR449C	UTP6	-0.41033	0.264795	0.560901	-0.760929	0.0659503	0.591002
YDR450W	RPS18A	-0.268348	0.0227201	-0.44686	-0.521379	0.307899	-1.10573
YDR451C	YHP1	0.127666	0.0305021	0.0656762	0.134705	0.574062	-0.0458788
YDR452W	PPN1	0.706411	0.338392	-0.822143	0.708162	0.76348	-1.27791
YDR453C	TSA2	-0.650058	0.230673	0.279772	-0.826352	-0.082599	0.328709
YDR454C	GUK1	0.270089	-0.72207	-0.17984	0.869122	-2.06181	0.0677489
YDR456W	NHX1	0.174202	-0.238913	-0.0342835	-0.246663	-0.554677	-0.406084
YDR457W	TOM1	-0.0846478	0.12318	-1.29797	-0.0657834	0.888154	-1.13611
YDR458C	HEH2	0.256093	0.346727	-0.434937	0.0669236	0.36683	-1.24224
YDR460W	TFB3	-0.712269	-0.449968	0.206576	0.39636	0.00563921	0.860597	yes
YDR461W	MFA1	0.548164	-0.903391	0.139812	-0.00812026	-0.637221	-0.249383
YDR462W	MRPL28	0.239716	-0.450104	-0.19183	-0.398359	-1.56877	-0.0947552
YDR463W	STP1	-0.684464	0.526998	0.778156	-0.538484	0.212403	0.775156
YDR465C	RMT2	NA	0.74175	0.301265	NA	1.02011	0.138839
YDR469W	SDC1	0.213271	0.132048	0.112738	0.346325	0.357779	-0.26108
YDR471W	RPL27B	-0.812361	-0.509222	-0.790979	-0.409201	-0.124846	-0.503419
YDR472W	TRS31	0.107294	-0.16005	-0.662087	-0.329989	0.205675	-0.561413
YDR473C	PRP3	-10.5656	0.913356	-0.0468666	-10.062	0.837706	0.174002
YDR474C	#N/A	-0.106147	0.273845	0.209021	-1.10494	0.0408512	-0.0664145
YDR476C	#REF!	0.741053	-0.691426	-0.129901	0.412674	-0.786785	-0.159097
YDR477W	SNF1	-0.498144	-0.74346	-0.758775	-0.477084	-0.407523	-0.853396
YDR478W	SNM1	0.255399	-0.359022	-0.184467	-0.113679	-0.538173	-0.447236
YDR479C	PEX29	1.26692	0.565389	-0.278361	0.982348	0.668505	-0.583738
YDR480W	DIG2	-10.6724	-10.6777	-10.6817	-10.0112	-10.2761	-10.5976
YDR481C	PHO8	0.910662	0.948922	0.412211	0.761321	1.04588	0.345735
YDR482C	CWC21	0.646117	-0.428606	-0.030626	0.644303	-0.31034	-0.270034
YDR483W	KRE2	-0.430442	0.394413	0.0972208	-2.46433	0.317267	-0.196708
YDR484W	VPS52	0.106473	0.000880497	0.247581	-0.934412	-0.182047	0.316798
YDR485C	VPS72	-0.606336	0.136062	0.0419833	-0.986088	-0.307458	0.219397
YDR486C	VPS60	0.667442	0.173988	-0.240067	0.167974	0.0009414	-0.435595
YDR487C	RIB3	0.395009	-0.259867	0.379018	0.846754	0.0378923	0.396766
YDR488C	PAC11	-0.645902	-0.386549	-0.0568822	-0.730456	-0.818744	-0.15568
YDR492W	IZH1	-1.0342	-0.103546	0.954591	-1.35469	-0.910544	0.701758
YDR493W	MZM1	0.244993	0.855063	NA	0.251971	0.544213	NA
YDR495C	VPS3	1.07703	-0.630596	-0.0468666	1.10382	-0.519568	0.462433
YDR496C	PUF6	-2.11018	0.438624	-0.829929	-2.6893	1.68894	-0.238936
YDR497C	ITR1	-0.183581	0.220882	-0.324126	-0.42064	0.0219382	-0.576607
YDR498C	SEC20	0.91218	0.736875	0.480579	0.693676	0.193586	0.543551
YDR499W	LCD1	-0.804027	0.46677	0.0929329	-1.32395	0.336917	-0.164577
YDR500C	RPL37B	-1.02137	-2.77685	-0.885638	-0.391007	-3.25376	-1.08386
YDR502C	SAM2	-0.220184	0.410406	-0.108977	1.04744	2.1572	0.855684	yes
YDR503C	LPP1	-0.426027	-0.362505	-0.0420139	-1.13427	-0.14553	-0.108046
YDR505C	PSP1	-0.804027	-0.0464018	0.187696	-0.678342	0.332437	-0.265486
YDR506C	GMC1	0.535199	-0.647053	0.428153	-0.147041	-1	0.0198804
YDR507C	GIN4	0.251645	0.490952	-0.0360192	0.135978	0.640502	-0.352034
YDR508C	GNP1	0.645093	1.45296	-0.123735	0.450694	1.46626	-0.172837
YDR510W	SMT3	-0.384713	-0.746982	-0.505505	-0.300421	-1.35726	-0.126928
YDR511W	ACN9	-0.488763	0.290205	0.0671142	-1.73562	0.230977	-0.0347057
YDR513W	GRX2	0.596117	-0.167945	-0.0101366	0.549106	0.285164	-0.368768
YDR514C	#REF!	0.582603	0.994706	0.488247	0.760262	0.811338	0.562284
YDR515W	SLF1	0.389621	-0.143417	0.244618	0.115477	-0.776279	0.540045
YDR516C	EMI2	0.793073	-0.663945	0.421376	0.511601	-0.24581	0.482625
YDR517W	GRH1	0.0724085	0.161484	0.674224	0.268383	-0.200645	0.664508
YDR519W	FPR2	0.841158	1.04889	0.0698066	0.317332	1.34695	-0.386741
YDR520C	URC2	-0.286563	0.190331	0.251275	-0.28842	-0.176777	0.244763
YDR522C	SPS2	0.238553	-0.746491	0.286681	0.27669	-0.917642	-0.0435141
YDR524C	AGE1	-0.0361476	NA	-0.0973191	-0.0634557	NA	-0.301257
YDR525W-A	SNA2	0.763658	0.572095	0.0535761	0.459554	0.541627	-0.170078
YDR527W	RBA50	0.651774	1.02377	0.290533	0.529476	0.823941	-0.146841
YDR528W	HLR1	-0.134236	0.430805	0.234202	-0.251339	0.0547925	0.271236
YDR529C	QCR7	-0.704491	-0.113294	-0.116576	-0.475206	-0.168631	-0.286244
YDR530C	APA2	-0.654186	-0.251776	-0.0198996	-1.47333	-0.381528	0.404281
YDR531W	CAB1	0.735918	-9.63979	0.549072	0.959628	-7.12177	0.599585
YDR532C	KRE28	-10.6724	-10.6777	-10.6817	-10.0112	-6.9542	-10.5976
YDR533C	HSP31	-0.373285	0.189137	-0.201681	-0.35124	0.0761179	-0.284752
YDR538W	PAD1	1.0057	-0.334871	0.467026	0.759728	-0.408773	0.556932
YDR539W	FDC1	0.374735	-0.57505	0.037161	0.258754	-0.56161	0.123182
YDR540C	IRC4	0.265684	0.0433795	-0.861499	0.0194399	-1.007	-1.37117
YEL001C	IRC22	0.438058	0.0704732	0.14169	0.515272	-0.25237	0.0444647
YEL002C	WBP1	0.841158	0.318035	0.187696	0.443765	0.464559	-0.0715533
YEL003W	GIM4	0.530478	0.0335162	0.3255	0.482918	0.05633	0.474715
YEL005C	VAB2	0.223956	0.77806	-0.0400774	-0.168745	0.920637	-0.1756
YEL006W	YEA6	-1.04594	0.121758	0.00844507	-1.19477	-0.165459	-0.351937
YEL007W	MIT1	-0.403187	-0.923831	-0.321222	1.09404	-0.960981	0.701005	yes
YEL008W	#REF!	-0.782161	0.374848	-1.17785	-1.78723	0.734404	-1.84939
YEL009C	GCN4	-0.0106472	0.227667	0.668156	-0.721208	-0.348346	0.49715
YEL011W	GLC3	0.0757675	0.221637	0.998242	-0.0775366	0.0469304	1.12437
YEL012W	UBC8	0.849666	0.407089	-0.177852	1.26082	0.706156	0.104586
YEL013W	VAC8	0.240971	-0.671126	-0.976662	-0.300495	-1.0401	-1.12531
YEL015W	EDC3	0.940233	0.661132	-0.077323	0.937249	0.648219	0.0206711
YEL016C	NPP2	-1.04988	-0.313363	0.354496	-2.16723	-0.47137	0.0493586
YEL017C-A	PMP2	-0.479442	0.195468	0.254697	-0.807018	0.28685	0.0681715
YEL017W	GTT3	-0.377805	-0.426237	-0.0315234	-2.38187	0.0770224	0.0792516
YEL018W	EAF5	-2.29879	0.0999877	-0.0275531	-1.76284	0.150967	0.628391	yes
YEL019C	MMS21	-0.210946	-0.410933	-1.47711	0.630824	-0.14813	-1.63759
YEL022W	GEA2	0.354098	0.422286	0.332343	1.76849	1.56229	1.50636
YEL027W	VMA3	0.0219325	0.438624	0.226715	-0.116409	0.562292	-0.0957499
YEL029C	BUD16	-0.356125	0.170779	-0.505326	-0.940513	-0.336837	-1.57277
YEL031W	SPF1	0.318592	-0.591306	0.489991	-0.179403	-0.564392	0.289729
YEL032W	MCM3	-0.370929	0.0519011	-0.457676	-0.651478	-0.723455	-0.995816
YEL037C	RAD23	0.387163	0.0049647	0.421376	1.97481	0.825536	2.14217
YEL038W	UTR4	-0.046925	0.324548	-0.281789	-0.292208	0.556431	-0.160465
YEL039C	CYC7	0.49106	0.353853	0.243612	0.956849	0.260364	0.394066
YEL040W	UTR2	-0.32924	-0.361438	-0.10803	-0.666931	-0.259316	-0.248859
YEL041W	YEF1	0.596813	0.92054	-0.14439	-0.188602	1.12486	-0.36292
YEL042W	GDA1	0.604347	-0.280043	0.206576	0.388134	-0.686383	0.120931
YEL043W	#REF!	0.0491317	-0.257169	0.129525	-0.00947809	-0.170749	0.290731
YEL044W	IES6	-1.04125	-0.521637	-0.74504	-0.4975	0.530425	-0.472174	yes
YEL046C	GLY1	-0.652689	-1.03431	-1.48938	4.04999	2.4239	2.25526	yes
YEL047C	FRD1	-10.5656	-10.6398	-10.5821	-10.062	-6.67431	-5.29523
YEL048C	TCA17	-0.735855	0.588425	0.12349	-0.966649	0.656009	-0.0447769
YEL050C	RML2	1.2803	0.872948	0.295909	0.824413	0.807355	-0.192295
YEL051W	VMA8	-1.29521	-0.436928	-0.234594	-2.6625	-0.808519	-0.44784
YEL052W	AFG1	0.386243	-0.264092	0.201729	0.804156	-0.330681	0.0641911
YEL053C	MAK10	0.68897	0.0586823	-0.272287	0.481627	0.271734	-0.824448
YEL054C	RPL12A	0.0146804	0.096609	-0.67075	0.23945	-0.347581	-0.702278
YEL055C	POL5	-1.25952	-0.0623641	-0.203847	-0.292208	0.0912248	0.394066
YEL058W	PCM1	-0.0285692	-0.781387	0.225213	0.110306	-0.804449	0.0792516
YEL059C-A	SOM1	0.365159	0.717759	-0.33066	0.299898	1.11054	-0.666848
YEL060C	PRB1	0.58734	-0.344024	-1.40971	0.497331	-0.631374	-2.69433
YEL061C	CIN8	0.415037	0.390387	-0.0505006	-0.06286	0.893801	-0.262197
YEL062W	NPR2	0.210982	-0.0284635	0.8355	-0.564144	-0.901085	0.43101
YEL063C	CAN1	0.870606	-0.258813	-9.68168	0.944423	-0.187336	-10.5976
YEL066W	HPA3	-0.32702	-0.000881035	-0.173883	-0.753839	-0.822854	0.140505
YEL068C	#REF!	0.074089	0.251539	-10.6817	0.121915	0.453496	-10.5976
YEL070W	DSF1	-0.301738	0.562475	-0.163024	-0.768053	-0.112475	0.366032
YEL071W	DLD3	NA	-0.041095	-10.6817	NA	0.321928	-10.5976	yes
YER001W	MNN1	0.0863705	0.827813	0.354496	-0.731129	0.877206	0.0623188
YER002W	NOP16	-0.209126	-0.0900082	-0.12271	0.653058	0.0499765	0.495713	yes
YER003C	PMI40	-2.46755	-0.486241	-0.404722	-2.38962	-0.121769	0.199822
YER004W	FMP52	-0.226376	0.172467	-0.913493	-0.464333	-0.220842	-0.984719
YER005W	YND1	-0.337962	0.198623	-1.52686	-0.507457	0.0743301	0.448928
YER006W	NUG1	0.193308	0.817636	-0.212036	1.95564	2.20315	-0.22799
YER007C-A	TMA20	-1.07251	-0.211133	0.471241	-1.92908	-0.274716	0.396059
YER007W	PAC2	-1.33196	0.185961	-0.886914	-0.940513	0.05633	-1.25668
YER008C	SEC3	0.316969	0.00439712	0.346228	-0.0599425	-0.721536	-0.206343
YER010C	#REF!	0.624246	0.420903	-0.127843	0.418744	0.133903	0.456088
YER011W	TIR1	-2.73903	-0.581801	0.184387	-3.14318	-0.455787	0.0716718
YER012W	PRE1	-0.265226	0.423602	0.0876289	-0.656905	-0.0743971	-0.00613653
YER013W	PRP22	-0.261797	-1.03061	0.0251883	-0.116602	-1.17819	-0.155
YER014W	HEM14	0.701208	0.298316	-0.802423	0.412674	0.140753	-1.53679
YER015W	FAA2	NA	-0.00588948	0.560603	NA	-0.0933605	0.2665
YER016W	BIM1	-10.6724	-10.6777	-10.6817	-10.0112	-5.88381	-10.5976
YER017C	AFG3	-10.5656	-10.6398	-10.5821	-10.062	-5.41128	-8.20212
YER018C	SPC25	0.465778	-0.354391	-0.0265942	0.376746	-1.16969	-0.220557
YER019C-A	SBH2	0.306285	-0.0750208	0.557921	0.0413408	-0.778273	0.605149
YER019W	ISC1	0.129283	-0.140501	0.0798736	-0.11187	-0.311784	0.291917
YER020W	GPA2	0.874253	-0.354391	0.112216	0.841836	-0.910544	0.0798062
YER021W	RPN3	-0.80052	-0.128898	NA	1.21939	1.50031	NA
YER022W	SRB4	0.121178	0.128024	-0.158116	0.351812	0.425182	-0.167134
YER023W	PRO3	0.819428	0.593743	0.336523	1.71286	1.17148	1.03177
YER024W	YAT2	0.526518	0.330313	0.302792	-0.0149222	0.25879	0.0564422
YER025W	GCD11	-2.72009	-1.87824	-1.70256	-3.57019	-1.42638	-2.08838
YER026C	CHO1	0.00617451	0.327433	-0.429857	-0.449178	0.0982795	-0.533239
YER027C	GAL83	0.607474	0.518186	0.312676	0.485812	0.298383	0.316529
YER029C	SMB1	-0.413293	-1.72391	-0.750835	0.575484	-1.64751	0.407055	yes
YER030W	CHZ1	-10.6724	-9.09276	-10.6817	-8.42626	-10.2761	-10.5976
YER031C	YPT31	0.700623	0.367234	0.213898	0.72504	0.306782	0.445335
YER032W	FIR1	0.340897	-0.502794	0.435965	0.509391	-1.2705	-0.196708
YER034W	#REF!	0.309142	0.414377	-0.150296	0.586825	0.916785	0.0615169	yes
YER035W	EDC2	-0.224615	-0.0996649	-1.72416	0.793601	0.0344291	-1.71831
YER036C	ARB1	-0.0195804	-0.883304	-0.644131	-0.261358	-1.16499	-0.319138
YER037W	PHM8	0.908128	-0.71498	0.302792	0.381933	-1.39385	0.424498
YER038C	KRE29	-0.378954	0.0484985	-0.440886	-0.183091	-0.0353331	-0.861185
YER039C-A	#REF!	-0.219064	0.700057	0.21633	-0.227575	0.723721	0.0314959
YER040W	GLN3	0.455569	0.285176	0.48574	0.233137	0.491232	0.313056
YER041W	YEN1	NA	-9.67772	-4.55239	NA	-10.2761	-4.51012
YER042W	MXR1	0.850692	-0.407372	0.467707	0.477113	-0.786785	0.527497
YER044C	ERG28	-0.0293309	-0.805322	0.17358	0.0736631	-1.02661	0.267518
YER047C	SAP1	-0.612837	1.08088	-0.24452	-1.01765	0.806817	-0.816261
YER048W-A	ISD11	-0.719684	0.0227201	-0.229436	-1.03109	0.101086	-0.0691329
YER049W	TPA1	-0.126496	-0.192897	0.2776	1.63443	-0.792309	0.789892	yes
YER050C	RSM18	0.0755705	0.355268	-0.391083	-0.356414	-0.0664865	-0.576415
YER051W	JHD1	0.0935258	0.0949167	0.222796	0.136399	0.15858	0.124306
YER052C	HOM3	-0.32924	-0.0936967	0.672572	0.254388	0.585738	1.25845
YER053C-A	#REF!	0.0674171	1.08002	0.31116	-0.13575	1.15181	-0.31034
YER054C	GIP2	0.707052	-0.0576509	-0.950965	1.08134	-0.172871	-0.769582
YER056C	FCY2	0.445649	0.753598	0.00469781	0.39636	0.423722	-0.229144
YER056C-A	RPL34A	-0.298473	-0.325676	0.240907	-0.818934	-0.727302	-0.032485
YER057C	HMF1	-0.603647	-0.251455	0.14169	-1.11641	-0.860383	0.248687
YER059W	PCL6	-0.18559	-2.16202	-0.391659	-1.23315	-2.72923	-0.292665
YER061C	CEM1	-0.0403389	0.10446	0.144871	-0.143949	0.854446	-0.0229935
YER062C	HOR2	0.206392	-1.01594	0.284107	0.1612	-1.05212	0.275088
YER063W	THO1	-0.749098	-0.150243	-0.493089	1.4574	1.52558	0.881688	yes
YER064C	VHR2	0.902537	-0.177291	0.0698066	1.09277	-0.61686	0.220992
YER067W	RGI1	-0.00907208	-0.117211	-0.220198	0.11288	0.141607	0.0362809
YER068W	MOT2	-0.113048	0.125604	0.0547243	-0.279908	-0.0199157	-0.145346
YER069W	ARG5,6	-0.219064	0.0718741	-0.29674	-0.584288	0.174522	0.334123
YER070W	RNR1	-1.76145	-2.85843	-1.67826	-2.04524	-1.93734	-1.20494
YER071C	TDA2	-0.429251	0.345342	0.547141	-0.78964	0.296576	0.768189
YER072W	VTC1	-0.0857979	0.173988	-0.391083	-0.187065	-0.00282789	-1.54391
YER073W	ALD5	0.768136	-0.085204	0.115694	0.785794	-0.18781	-0.00613653
YER075C	PTP3	0.768136	0.222844	-2.16429	0.0607819	-0.170749	-2.67074
YER077C	#REF!	0.586707	0.436355	0.624262	0.116619	0.475437	0.203018
YER078C	ICP55	0.619321	-0.136623	0.939916	0.735287	-0.0887723	0.656851
YER079W	#REF!	0.704243	0.298128	0.284107	0.916551	-0.141698	0.0774879
YER080W	AIM9	0.738773	0.492707	-0.570915	0.376746	0.727707	-1.39799
YER081W	SER3	-0.475209	0.518882	0.36135	-1.8413	0.319133	-0.196708
YER082C	UTP7	-0.350045	-2.82601	0.190997	-0.285613	-3.30508	0.0446168
YER084W	#REF!	-0.284408	-0.0750208	-0.25018	-1.71661	0.223721	0.00881817
YER086W	ILV1	0.307	-10.6777	-0.110873	0.0828504	-10.2761	-0.208494
YER087C-A	#REF!	-1.45705	-0.903391	-0.412217	-2.21656	-0.824644	-1.01973
YER087W	AIM10	0.467126	-0.026668	-0.588921	0.115477	-0.418143	-0.808053
YER088C	DOT6	-0.88083	-1.28444	-0.0983262	-1.57421	-1.33327	-0.284752
YER089C	PTC2	-0.175572	-0.606257	-0.349641	1.27591	-0.238577	0.800622	yes
YER090W	TRP2	-0.548304	-0.208078	-0.138646	-0.682552	-0.0740006	0.0862848
YER091C	MET6	-0.895992	0.0904647	-0.151271	0.102515	2.65202	2.66451	yes
YER092W	IES5	-1.0651	-1.35805	0.180185	-1.46433	-1.27612	1.27663	yes
YER093C-A	AIM11	-10.6724	-10.6777	-10.6817	-10.0112	-10.2761	-10.5976
YER095W	RAD51	-1.19926	-2.18858	-0.949147	-0.387854	-1.742	-0.0975251
YER098W	UBP9	0.840315	0.126411	0.916375	0.397102	0.217731	0.688971
YER099C	PRS2	NA	0.123419	-0.376349	NA	-0.246927	-0.578242
YER100W	UBC6	0.544321	0.581435	0.579242	0.00975268	-0.0353331	0.79473
YER101C	AST2	-0.658688	-0.0842451	-0.307182	-1.00405	-0.907008	-0.333301
YER102W	RPS8B	1.01185	0.00316133	-0.730393	0.795157	-0.0103961	-0.942381
YER103W	SSA4	-0.134081	0.13417	-0.380018	-0.103493	0.49695	-0.443901
YER104W	RTT105	0.0123233	0.00439712	-1.16008	0.118056	-0.321928	-1.94295
YER105C	NUP157	-3.38702	-0.436928	-0.116576	-2.93441	-0.210035	-0.42641
YER107C	GLE2	-0.749098	-1.87682	-0.429012	-0.991637	-3.1676	-0.223634
YER110C	KAP123	-0.413859	0.0467942	-0.109925	0.65322	1.65387	1.12437	yes
YER111C	SWI4	-0.4789	-0.388854	0.365446	-0.964103	-0.740849	0.471191
YER112W	LSM4	-0.36468	0.993656	-0.344932	0.221042	1.22414	-0.153637
YER113C	TMN3	-0.463602	-0.834049	0.275061	-0.608776	-0.905244	-0.183924
YER114C	BOI2	0.843813	-0.595399	0.576468	0.507809	-0.914089	0.79858
YER116C	SLX8	-0.139096	0.695689	0.541721	-0.133176	0.509328	0.403117
YER118C	SHO1	0.678191	0.236724	-0.139198	0.447729	0.14842	-0.232018
YER120W	SCS2	-0.545721	-0.614325	0.162243	-0.392842	-1.03772	0.163964
YER122C	GLO3	0.196804	-0.74346	-0.438759	-0.394935	-0.988744	-0.192295
YER123W	YCK3	-1.20803	-0.649689	-0.099334	-2.20407	-0.868674	0.135498
YER124C	DSE1	0.146949	-0.188582	0.115694	-0.0494216	-0.246927	0.354382
YER126C	NSA2	-1.27796	-1.31358	-0.473443	-1.06286	-1.90544	-0.427662
YER127W	LCP5	-10.6724	-10.6777	-10.6817	-5.7633	-5.57568	-10.5976
YER128W	VFA1	-0.204731	-0.554985	0.141519	-0.188602	-0.653423	-0.0523767
YER129W	SAK1	-0.447935	-1.38949	-0.14543	-0.380808	-1.6955	0.27361
YER131W	RPS26B	-1.08746	-0.263034	-0.16795	-2.31774	-0.623279	-0.388134
YER132C	PMD1	0.675809	0.566611	-0.638162	0.47031	-0.12793	-0.692349
YER133W	GLC7	NA	-0.00952577	-0.264729	NA	-0.466157	-0.560072	yes
YER134C	#REF!	0.930776	1.20961	-0.450285	1.22797	1.04861	-0.126645
YER136W	GDI1	-0.358409	0.355703	-0.403228	-0.828833	0.21272	-0.61602
YER139C	RTR1	-0.418373	-0.0576509	-0.384925	-0.57823	0.216461	-0.659092
YER141W	COX15	0.819206	0.523228	0.340442	0.595272	0.552584	0.399647
YER142C	MAG1	-0.482601	0.00439712	-0.460091	-0.572435	-0.357261	-0.499555
YER143W	DDI1	-0.719684	-0.590257	-0.573153	0.0682575	-0.237205	0.0390376
YER144C	UBP5	-0.244778	1.03705	0.627311	0.055597	0.782934	0.306661
YER145C	FTR1	0.428068	0.651953	-0.222392	0.122829	0.220508	0.0218779
YER147C	SCC4	-0.54877	0.0864253	0.234842	-0.398488	0.133903	0.383778
YER148W	SPT15	0.234465	0.523179	0.374283	0.389652	0.504415	0.126074
YER149C	PEA2	0.218239	0.274592	-0.607727	-1.46213	0.371541	-1.15228
YER151C	UBP3	0.566922	-0.104518	-0.0371775	0.152273	-0.586847	-0.45729
YER152C	#REF!	-0.116878	-0.4168	0.0135506	0.447179	-0.452757	0.0534647
YER153C	PET122	-0.571225	-0.0398801	0.310401	-0.722196	-0.296955	-0.108046
YER154W	OXA1	-10.6724	-10.6777	-10.6817	-9.01123	-10.2761	-6.59759
YER155C	BEM2	-0.810691	-0.818019	-1.02947	-1.33753	-1.31441	-1.44057
YER156C	#REF!	-0.130361	0.00439712	-1.08176	1.30052	1.26787	0.270464	yes
YER157W	COG3	-0.132297	0.640823	1.00088	-0.537522	0.903163	0.658622
YER158C	#REF!	-0.126496	-0.251455	0.401802	-0.649283	-0.626868	0.491863
YER159C	BUR6	-0.0294711	-0.32678	0.0308493	2.31969	0.995922	1.67533	yes
YER161C	SPT2	-0.0508641	-0.925547	-0.67826	2.93266	1.05316	2.31012	yes
YER162C	RAD4	-1.07997	-0.213174	0.00744675	-1.49947	0.0207918	-0.0305817
YER163C	GCG1	0.110573	0.249318	0.825621	0.185989	-0.0449032	1.12095
YER164W	CHD1	-0.322404	-0.474886	-0.0634888	0.910934	-0.158085	0.994478	yes
YER165W	PAB1	-1.45705	-1.54704	-1.05076	-1.61084	-2.20182	-0.666848
YER166W	DNF1	0.0874628	-0.372798	0.0135506	-1.10735	-1.18073	-0.219292
YER168C	CCA1	0.162046	0.407089	-0.129969	1.10706	1.23908	0.707335
YER169W	RPH1	-0.26622	0.145648	-0.603527	-0.0998353	0.532035	-0.959151
YER170W	ADK2	-0.331958	0.132522	0.169402	-0.0776277	-0.269452	0.207267
YER171W	RAD3	-0.529042	0.789886	0.57217	-0.0396837	1.72458	1.04672	yes
YER172C	BRR2	-0.209923	-0.0584167	-0.153224	0.590544	0.303192	0.0985111
YER173W	RAD24	-0.812361	0.0184186	-0.616358	-0.695724	-0.259272	-0.370817
YER174C	GRX4	0.307714	0.383652	0.696617	0.522102	0.250375	0.833388
YER175C	TMT1	0.348555	-0.0778068	0.491375	0.568089	0.0310764	0.272778
YER176W	ECM32	-0.601237	0.120095	0.237239	-0.985231	-0.117676	-0.196499
YER177W	BMH1	-0.614293	1.29316	-1.88866	1.18232	2.56934	0.137726	yes
YER178W	PDA1	-10.5656	-9.63979	-10.5821	-10.062	-5.88076	-5.15773
YER182W	FMP10	-0.446013	-0.365971	-0.575769	-1.54362	-0.0801371	-0.745838
YER183C	FAU1	-0.352474	0.224393	-0.293276	-0.621177	0.0581401	-0.424047
YER188W	#REF!	0.769254	-0.360182	-10.5821	0.942877	-0.467458	-10.2021
YFL001W	DEG1	0.443919	0.277204	-1.16008	1.37248	0.838269	-1.94295
YFL002C	SPB4	-0.605576	-0.353235	0.379308	-0.00540842	-0.271724	0.851123
YFL004W	VTC2	0.270472	0.0273186	-0.361764	-0.0890664	-0.406275	-0.344143
YFL006W	#N/A	0.35962	-0.433356	-0.353003	-0.537522	-0.59313	-0.341378
YFL007W	BLM10	-0.368361	0.146477	-0.809003	-0.361606	0.24137	-0.668794
YFL008W	SMC1	-0.612837	-0.520852	0.193468	1.68908	0.799802	2.3256	yes
YFL010C	WWM1	0.386435	0.42495	-0.0410454	0.424789	0.715142	0.323397
YFL013C	IES1	-0.480133	0.352947	-0.00660273	0.436889	1.33305	0.424781	yes
YFL014W	HSP12	-0.109229	0.148034	0.318322	0.827189	0.919863	1.26428	yes
YFL016C	MDJ1	0.81139	-1.09464	-0.0459595	-0.279908	-1.04731	-0.410235
YFL017C	GNA1	-0.00886724	0.404429	-0.259613	0.474602	0.515852	0.00881817
YFL017W-A	SMX2	-0.680903	0.612875	0.2776	0.373556	1.74347	0.404525	yes
YFL018C	LPD1	0.388946	-0.394631	-1.01634	-0.205483	-1.29598	-1.12185
YFL021W	GAT1	-0.549597	-0.333424	1.03899	-0.557957	-1.04731	0.745043
YFL023W	BUD27	-0.322404	0.836953	0.426287	-0.334126	0.512877	-0.295233
YFL024C	EPL1	-0.185117	0.105881	0.0689097	-0.554251	0.202616	0.124306
YFL025C	BST1	0.370602	-0.15122	0.428806	0.4441	-0.0128552	0.341992
YFL026W	STE2	-0.0669458	-1.31578	-0.472224	-0.448985	-1.2705	-0.61602
YFL027C	GYP8	-10.6724	-10.6777	-10.6817	-10.0112	-4.32193	-10.5976
YFL028C	CAF16	0.405725	0.0578364	0.257902	0.362725	0.117266	0.435147
YFL029C	CAK1	-2.19669	-1.14244	-1.01457	-3.05703	-1.00934	-0.689194
YFL030W	AGX1	0.131706	0.0365259	0.0656762	-0.122484	0.173024	-0.218209
YFL031W	HAC1	-0.276891	0.460552	0.25496	-0.142405	1.20719	1.39039
YFL033C	RIM15	-0.879078	-1.4774	-0.252346	-1.47333	-1.70776	-0.978122
YFL034C-A	RPL22B	-0.657186	0.644453	0.677013	-0.456567	0.661973	0.692694
YFL034C-B	MOB2	0.152955	0.0112588	-0.043953	-0.788251	-0.181389	-0.598497
YFL034W	#REF!	-10.6724	-10.6777	-10.6817	-6.20387	-4.78427	-5.07403
YFL041W	FET5	-0.854772	0.782798	0.277393	-1.40027	0.293781	0.179419
YFL044C	OTU1	-0.75804	0.365991	0.353121	-0.0425605	0.183307	0.397473
YFL045C	SEC53	-10.6724	-10.6777	-10.6817	-10.0112	-5.63227	-10.5976
YFL046W	FMP32	-0.491437	-0.21248	0.469067	-0.79526	-0.067473	0.211504
YFL047W	RGD2	0.0140752	0.409743	0.63517	-0.183091	0.581079	-0.0267826
YFL048C	EMP47	-0.866873	-0.622985	-0.077323	-1.35124	-0.58261	0.070506
YFL049W	SWP82	0.327575	0.325095	-0.173883	-0.42064	0.727394	-0.441504
YFL050C	ALR2	1.11829	0.458897	0.00844507	0.779518	0.267422	-0.505156
YFL053W	DAK2	0.266521	-0.761742	0.0671142	-0.818872	-0.640153	-0.435595
YFL060C	SNO3	-0.0467165	0.669902	0.442444	-0.991637	0.873623	0.32574
YFL062W	COS4	-0.594035	-0.520852	-0.163235	0.30646	-0.785161	-0.757109
YFR001W	LOC1	-0.814034	-0.283341	0.311918	-1.03138	-0.387675	0.521537
YFR002W	NIC96	0.506554	-0.204123	0.414332	0.27446	-0.0783688	-0.129321
YFR003C	YPI1	-0.269809	0.214296	-0.0275531	0.0620752	0.0426809	0.0242884
YFR004W	RPN11	-0.543142	-0.331206	-0.220198	0.751985	1.48001	0.850013	yes
YFR005C	SAD1	0.614132	0.499077	-0.207972	0.687477	0.991833	-0.0526226
YFR007W	YFH7	-0.0361476	0.436355	0.32925	-0.548319	0.679719	-0.125308
YFR008W	FAR7	-0.841064	0.914316	-0.178065	-1.39316	0.756421	-1.65138
YFR009W	GCN20	0.0114465	-0.985976	-1.92013	-0.167306	-2.14684	-1.80317
YFR010W	UBP6	-2.64671	-2.43034	-1.56255	-0.665441	-2.04593	-0.581904
YFR011C	AIM13	NA	-0.755622	0.144076	NA	-1.81302	0.223092
YFR013W	IOC3	-0.58099	-0.556186	-0.282934	-0.243043	-0.0900102	0.164795	yes
YFR014C	CMK1	0.675213	1.12508	0.483274	0.950578	0.98818	0.503509
YFR015C	GSY1	0.703157	0.100357	0.796081	0.88964	-0.126377	0.870528
YFR016C	#REF!	0.236938	0.668546	-1.6603	-0.574206	0.672647	-1.92135
YFR017C	IGD1	-0.596911	-0.837277	0.275839	-1.13131	-0.921205	0.0658333
YFR018C	#REF!	-0.212994	0.322985	0.614665	-0.772823	-0.153296	0.508321
YFR019W	FAB1	-0.260914	-0.209096	0.579242	-0.799339	-0.241325	0.737803
YFR021W	ATG18	-0.135126	-1.0068	0.338211	-1.35469	-1.20399	0.0158339
YFR024C	#N/A	0.79472	0.603381	0.238037	0.716852	0.34064	-0.372401
YFR024C-A	LSB3	0.270822	-0.235813	0.214655	-0.16417	-0.066671	0.207351
YFR025C	HIS2	0.0614374	0.505916	-3.65931	-0.0908744	0.181256	-5.20527
YFR026C	ULI1	0.0114465	0.399764	0.0274062	0.228371	0.471229	-0.123881
YFR028C	CDC14	-1.27582	-0.128898	-0.144459	-3.22987	-1.18073	-0.0353446
YFR030W	MET10	0.602535	0.154379	-0.254365	0.408733	0.280382	-0.914592
YFR031C	SMC2	0.0683253	-0.268016	0.31116	0.0529975	-0.162294	0.633137
YFR031C-A	RPL2A	-0.968522	-0.0759489	-1.25541	-0.533469	0.277505	-1.72722
YFR032C-A	RPL29	-0.285485	-0.300509	-0.112772	1.36869	0.737896	0.644992	yes
YFR033C	QCR6	0.616816	0.110914	-0.273803	0.74047	0.162792	-0.45561
YFR036W	CDC26	0.509901	0.343201	0.0279601	0.492543	-0.138257	0.278666
YFR037C	RSC8	0.0245422	-0.298341	-0.294737	1.79532	1.11243	1.2479	yes
YFR039C	OSW7	-0.682321	0.0754971	-1.08549	-0.921115	-0.239951	-1.73961
YFR040W	SAP155	0.0165638	0.902272	-0.236737	-0.515152	0.705357	-0.605934
YFR043C	IRC6	0.0259442	-0.407372	0.18107	-0.180932	-0.368096	0.257308
YFR044C	DUG1	1.13962	0.868992	0.577729	2.19151	1.30259	1.35342
YFR046C	CNN1	0.277401	-0.573121	0.25275	-0.389175	-1.52458	0.201695
YFR047C	BNA6	0.532757	0.0970674	0.286269	0.751985	0.175087	0.637829
YFR048W	RMD8	-0.256102	0.230572	0.59091	-0.580247	0.0112565	0.582511
YFR049W	YMR31	0.533112	0.00586554	-0.228995	0.218725	-0.0833487	-1.07542
YFR050C	PRE4	-1.24407	-0.581004	-1.49433	-0.0411214	0.443264	-0.0720662
YFR051C	RET2	-0.450534	0.358092	-0.316527	-1.30049	0.048156	-1.62469
YFR052W	RPN12	-1.32149	-0.134688	0.634038	-2.4338	1.43296	1.72828	yes
YFR053C	HXK1	-0.265158	-0.816633	0.263766	0.544321	-0.388904	0.752247
YFR054C	#REF!	0.647526	0.570878	-0.0595605	0.393281	0.524053	-0.129321
YFR055W	IRC7	0.383535	-0.816633	-0.357497	0.538557	-0.847764	0.102853
YGL001C	ERG26	-0.640766	-2.29106	-1.58779	-0.833227	-1.6955	-1.58741
YGL004C	RPN14	0.149526	0.134994	0.016841	-0.310502	-0.172871	-0.290732
YGL005C	COG7	-0.588298	-0.338297	-0.11964	-0.95091	-0.972022	-0.327142
YGL006W	PMC1	0.872174	0.651378	0.412918	0.334559	0.19441	0.261401
YGL008C	PMA1	0.217839	-0.40509	0.418328	0.0615753	0.182282	0.333889
YGL009C	LEU1	-0.420943	0.149623	0.33304	2.60463	2.69506	2.79554	yes
YGL010W	#REF!	0.157297	-0.0501858	0.695533	0.385378	0.587288	0.699329
YGL011C	SCL1	NA	0.869175	0.0698664	NA	1.01447	-0.104732
YGL012W	ERG4	-3.49252	-1.98075	-1.68732	-4.05703	-1.59313	-2.09376
YGL013C	PDR1	-1.12679	0.389494	-0.0170399	-1.62325	0.562183	-0.702278
YGL014W	PUF4	-10.5656	-0.835662	0.0187001	-10.062	-0.875568	0.305671
YGL016W	KAP122	0.881505	0.462183	0.346376	0.779518	-0.0963777	0.134383
YGL017W	ATE1	0.507224	0.331032	-0.072367	0.521977	0.467967	-0.101461
YGL018C	JAC1	0.651168	1.08088	0.624262	-0.00540842	0.760874	0.200888
YGL019W	CKB1	0.892828	0.39363	0.478554	1.64747	0.823941	0.656634
YGL020C	GET1	-0.114367	0.554964	0.0617142	-0.566191	0.365706	0.0809645
YGL021W	ALK1	0.516781	0.408417	0.500096	-0.290128	-0.250985	0.336104
YGL022W	STT3	0.730765	0.826793	-0.17913	-0.0977053	0.841915	-0.609667
YGL025C	PGD1	0.120047	-2.23891	-0.106409	0.353696	-1.68638	0.220992
YGL026C	TRP5	0.21332	0.557424	0.206576	0.571857	0.787306	0.626013
YGL027C	CWH41	-0.251412	-0.870365	-0.321928	-0.00419999	-2.00466	-0.59056
YGL028C	SCW11	0.218239	-0.588584	-0.434937	-0.224418	-0.875568	-0.643703
YGL029W	CGR1	-0.0109893	-0.814834	-0.44387	1.68866	-0.543654	0.557764	yes
YGL030W	RPL30	-9.67243	-10.6777	-10.6817	-7.42626	-5.88381	-10.5976
YGL031C	RPL24A	-1.33035	-0.706176	-0.138646	-1.95053	-1.46877	-0.245544
YGL032C	AGA2	0.842752	-1.53127	0.114826	0.78266	-1.70162	0.135498
YGL035C	MIG1	-0.95271	-0.214577	0.0307265	-0.484617	-0.0983926	0.748432
YGL036W	#REF!	0.937254	1.31549	-0.40099	0.905901	0.863814	-0.535012
YGL037C	PNC1	-0.147884	0.224655	-0.254365	-0.454721	0.479598	-0.368768
YGL038C	OCH1	0.588494	0.23816	0.385757	0.311828	0.305076	0.200885
YGL039W	#REF!	-10.5656	-10.6398	-10.5821	-10.062	-4.74831	-7.8802
YGL040C	HEM2	0.22314	-0.850259	0.350811	0.835799	-0.254771	1.34477
YGL043W	DST1	-1.6668	-0.185867	-0.45647	-1.39652	1.14489	0.480564	yes
YGL044C	RNA15	-0.919209	-0.210114	-0.863095	1.58263	2.97964	2.01436	yes
YGL045W	RIM8	0.677001	0.548796	0.41997	0.420762	0.172852	0.359164
YGL046W	#N/A	0.296961	-3.20199	-10.6817	0.315202	-0.496405	-10.5976
YGL047W	ALG13	-0.254965	-0.451204	-0.198438	-0.261146	-0.519154	0.055264
YGL048C	RPT6	0.145358	-10.6777	0.239419	0.289125	-10.2761	0.30177
YGL049C	TIF4632	-0.146671	-0.176269	-0.207103	-0.977238	0.0644579	-0.41259
YGL050W	TYW3	-1.15619	-1.36134	-0.41347	-1.94311	-1.49109	-0.0422525
YGL053W	PRM8	-0.536716	0.293824	0.623244	-0.953236	0.413874	0.541325
YGL054C	ERV14	-1	-1.36257	-0.467359	-0.975054	-3.21004	-0.450382
YGL055W	OLE1	-2.41076	0.254267	0.0224112	-1.24826	0.533843	0.239783
YGL056C	SDS23	0.279128	0.76162	-0.0170399	1.45119	1.52373	0.907707	yes
YGL057C	GEP7	-0.470181	0.564167	0.153414	-1.85259	0.580561	-0.204944
YGL058W	RAD6	-0.245112	-0.410933	-0.222246	-0.892286	-1.60724	-0.608902
YGL059W	PKP2	0.402385	0.359827	0.5927	-0.186269	0.199609	0.35151
YGL060W	YBP2	0.268622	-0.176878	0.119222	-0.131644	-0.218133	0.236094
YGL061C	DUO1	0.923266	0.972154	0.204944	0.995269	0.398939	-0.0612941
YGL062W	PYC1	0.216601	-0.56699	-0.67826	0.688661	-0.321457	-0.0612941
YGL064C	MRH4	-10.6724	-6.59026	-10.6817	-10.0112	-5.1062	-10.5976
YGL065C	ALG2	0.632253	0.96012	0.151721	0.586311	0.952129	0.325353
YGL066W	SGF73	0.17698	-0.0356679	-0.302299	0.240255	0.011588	-0.029631
YGL067W	NPY1	-10.6724	-10.6777	-10.6817	-8.01123	-6.9542	-10.5976
YGL068W	MNP1	0.549766	-0.150243	0.132905	0.807355	0.197581	0.475885
YGL070C	RPB9	-0.452047	-1.72643	0.346919	0.725175	-0.648591	1.21298	yes
YGL071W	AFT1	-2.34158	-0.159003	0.291302	-3.41819	-0.0420418	-0.302767
YGL076C	RPL7A	-5.65869	-1.54176	-0.423532	-5.25469	-1.31207	-0.708268
YGL077C	HNM1	-1.17457	-0.232705	0.112738	-4.88194	0.105419	-0.057459
YGL078C	DBP3	0.0280144	-0.386549	0.17708	1.77177	0.861507	1.05884	yes
YGL079W	KXD1	NA	-0.254604	0.0815347	NA	-0.355772	0.0993805
YGL080W	FMP37	-0.566517	0.535385	NA	-1.51937	0.66272	NA
YGL082W	#REF!	-0.147726	-0.46362	-0.162182	0.287788	0.329442	0.348623
YGL083W	SCY1	-0.226376	-0.122172	0.120839	-0.777608	-0.433774	-0.0154451
YGL084C	GUP1	-0.745399	0.331751	0.572676	-1.15516	0.203434	0.56854
YGL085W	LCL3	0.657371	1.0022	0.593865	0.56242	1.00407	-0.00326244
YGL086W	MAD1	-2.05383	0.985459	0.158482	-1.55425	0.905132	-0.160465
YGL087C	MMS2	0.00237794	-0.0306142	1	0.419753	-0.0160985	1.31505
YGL090W	LIF1	-0.349371	-0.159066	-0.519286	-0.644905	-0.708168	-0.510124
YGL092W	NUP145	0.286171	-0.710534	-0.146472	0.469335	-0.94639	0.0774868
YGL094C	PAN2	0.406393	0.93653	0.482601	0.301656	0.933938	-0.224722
YGL095C	VPS45	0.898968	0.191514	-0.230099	0.836555	0.0187123	0.00976447
YGL097W	SRM1	-0.330761	-0.516965	0.0344069	2.774	1.97865	3.58955	yes
YGL098W	USE1	-1.72953	-0.906778	-0.11964	-1.9799	-1.29811	-0.00122522
YGL099W	LSG1	-0.953037	0.459271	-0.667657	-1.6848	-0.158481	-1.14844
YGL100W	SEH1	-1.07065	-0.289702	-0.893775	-1.72583	-0.378279	-0.971878
YGL101W	#REF!	0.0500515	0.07874	-0.594878	0.153487	0.434911	-0.831436
YGL105W	ARC1	-1.21299	-0.886557	-1.03782	-1.72583	-0.814645	-1.31218
YGL107C	RMD9	0.739344	0.302722	0.058103	0.401478	-0.0218235	-0.253757
YGL108C	#REF!	0.0866306	-0.445299	-0.495563	0.121915	-2.03295	-0.857806
YGL110C	CUE3	-0.117836	-0.760348	0.0248184	-0.529428	-0.711975	0.0106678
YGL111W	NSA1	-0.446013	-0.4441	-1.03602	-1.46048	-0.134017	-1.11983
YGL112C	TAF6	-0.13715	0.0586823	-1.01634	0.515272	0.349584	-0.14226	yes
YGL113W	SLD3	-1.3807	-0.79117	0.0946966	-1.6191	-1.1136	0.275634
YGL115W	SNF4	-10.6724	-10.6777	-10.6817	-8.42626	-4.41814	-10.5976
YGL117W	#REF!	0.674088	-0.121214	-0.132856	0.647877	-0.429067	-0.136108
YGL119W	COQ8	-0.111137	-0.206044	-0.399748	-2.33175	-0.223556	-1.03153
YGL120C	PRP43	-1.63077	-0.581004	-0.344056	-2.41877	-0.85406	0.475885
YGL122C	NAB2	-0.2963	0.370767	-1.25123	1.51429	1.84767	-0.514108	yes
YGL124C	MON1	0.626715	0.40255	-0.231203	0.102861	0.00751405	-0.0110646
YGL125W	MET13	0.55037	-0.0159415	-0.316449	0.761912	0.011588	-0.2269
YGL126W	SCS3	0.120365	0.226915	0.506911	0.250868	0.201634	-0.243338
YGL127C	SOH1	-0.333157	-1.7541	-0.809003	-0.0424554	-1.60679	-0.00367878	yes
YGL128C	CWC23	0.49106	0.261828	0.105234	0.0762257	0.0527028	0.0658333
YGL129C	RSM23	-0.440004	0.609993	0.0790423	-2.12248	0.386544	0.0695245
YGL130W	CEG1	-10.5656	-10.6398	-10.5821	-7.74012	-5.82631	-10.2021
YGL131C	SNT2	-1.1469	-0.651196	-0.548535	-3.39652	-0.916375	-0.257737
YGL133W	ITC1	-1.02642	0.186756	0.297441	-0.031379	0.700729	1.02369	yes
YGL134W	PCL10	0.656613	0.1042	-0.340159	0.438796	0.302206	0.24082
YGL135W	RPL1B	0.0997578	0.173187	-0.147514	2.46078	1.68909	1.7488	yes
YGL137W	SEC27	-0.270957	-0.610506	-0.104384	-0.755984	-0.557446	-0.342589
YGL140C	#REF!	-0.807355	0.60219	0.452657	-1.61084	0.54937	0.224141
YGL141W	HUL5	-0.526659	-0.886576	-0.160077	-0.899655	-0.58261	0.154328
YGL143C	MRF1	0.12878	0.486266	-0.916806	-0.852593	0.592477	-0.886974
YGL144C	ROG1	0.395009	-0.445299	0.39447	0.0041878	-0.354283	0.440646
YGL145W	TIP20	-1.00525	0.035282	-0.417235	-1.86237	0.0644579	-0.383542
YGL147C	RPL9A	-0.198163	-1.32464	-1.29212	-0.134268	-1.48054	-0.692349
YGL148W	ARO2	0.277401	0.726357	0.0538784	1.1866	1.60231	0.613693	yes
YGL150C	INO80	-0.863405	-1.08329	-0.0783162	0.586311	-0.0218235	0.747703
YGL151W	NUT1	-0.119529	-0.14794	0.230837	0.482918	0.188637	0.289729
YGL153W	PEX14	-0.160437	0.0675662	0.179409	-0.207178	-0.0833487	0.471185
YGL154C	LYS5	0.685904	0.530758	0.0805264	0.236016	0.34287	-0.0975251
YGL155W	CDC43	0.704133	0.267098	0.431878	0.605065	-0.10041	-0.00736697
YGL156W	AMS1	0.951599	0.795356	-0.271529	0.627078	0.719724	-0.200716
YGL157W	ARI1	0.410389	-0.294015	-0.200887	0.397102	-0.354283	-0.253291
YGL159W	#REF!	0.12442	0.246666	0.106108	-0.0466311	0.0912248	-0.21202
YGL161C	YIP5	-0.506262	0.444461	-0.365396	-1.72121	0.951492	-0.995816
YGL162W	SUT1	0.11917	0.892563	0.50333	-0.0676927	1.0996	0.953959
YGL163C	RAD54	-0.771559	0.488443	-0.0623747	-1.62321	0.222725	-0.26555
YGL164C	YRB30	0.113027	-0.0529242	0.163028	-0.400202	-0.558448	-0.399142
YGL166W	CUP2	0.0137378	-0.274564	0.0955777	0.47905	-0.341602	-0.16595
YGL167C	PMR1	0.478816	0.0864253	0.464982	0.299898	0.095638	0.364882
YGL169W	SUA5	-1.82694	-1.1289	-0.690156	-1.04256	-0.539722	-0.593367
YGL172W	NUP49	-0.235714	-1.20401	0.2461	0.00836347	-2.25376	-0.0211027
YGL173C	XRN1	-0.464191	0.45799	NA	-0.768053	0.4095	NA
YGL175C	SAE2	-0.25383	-0.0306142	0.224408	0.190619	-0.606786	0.0458037
YGL178W	MPT5	-0.634841	0.672523	-0.126815	-0.469589	0.784028	-0.0435141
YGL180W	ATG1	0.288301	-0.242049	0.114362	-0.0614005	-1.29598	-0.238936
YGL181W	GTS1	0.0366585	-0.552306	-0.0423369	0.204306	-0.864613	-0.135085
YGL184C	STR3	-0.956399	-0.20934	0.176914	-1.4884	-0.255895	0.0398593
YGL185C	#REF!	0.184778	-0.421511	-0.277601	-0.0154601	-0.752562	-0.603234
YGL187C	COX4	-0.588298	0.690003	0.143224	-1.76743	0.32569	-0.0676975
YGL189C	RPS26A	-0.375509	-0.311397	-0.0967152	-0.0908744	0.23464	0.267373
YGL190C	CDC55	-0.698299	0.956397	0.209021	-1.46213	1.18988	0.455195
YGL194C	HOS2	-0.602682	-0.621593	-0.452859	-0.447336	-0.565786	-0.0935994
YGL195W	GCN1	0.176731	-1.19892	0.18273	-0.303823	-1.55329	0.059971
YGL197W	MDS3	0.0149503	0.73855	-0.0605415	0.0152962	0.991833	0.338315
YGL200C	EMP24	0.432307	0.928638	0.475173	0.0620752	0.632511	0.649625
YGL201C	MCM6	0.550766	-1.07564	0.309642	3.26705	0.788397	2.74039	yes
YGL202W	ARO8	0	-0.153178	-0.301217	0.139789	-0.993036	-0.684698	yes
YGL203C	KEX1	-0.794374	0.125604	-0.252271	-1.45664	-0.277534	-0.85612
YGL206C	CHC1	-2.20075	-0.166955	-0.300135	-4.48767	0.186378	-0.741162
YGL207W	SPT16	-0.16265	0.477098	0.530211	4.78161	5.117	5.03242
YGL208W	SIP2	0.314128	-0.0556678	0.402466	0.432752	0.202645	0.57609
YGL209W	MIG2	-0.390495	0.00351877	-0.718782	-0.183091	0.465343	-1.44784
YGL210W	YPT32	-3.76553	-0.653965	-0.349641	-5.31079	-0.436921	-0.0632842	yes
YGL211W	NCS6	-1.00887	0.020985	-0.42783	-0.202263	0	-1.00326
YGL212W	VAM7	-0.193801	-0.224051	-0.713319	0.160749	-0.00944794	-0.437252	yes
YGL213C	SKI8	-0.460979	-0.340585	0.200856	-0.767425	-0.133084	-0.39638
YGL216W	KIP3	-0.109229	-0.669291	0.150421	0.269544	-1.19132	0.0597314
YGL219C	MDM34	0.0881626	0.468078	0.0187001	0.100345	0.557071	-0.0347057
YGL220W	FRA2	-0.138265	0.731439	-0.0294729	-0.138719	1.07209	0.593104
YGL221C	NIF3	0.415989	0.0040633	-0.245635	0.371539	-0.176059	0.106215
YGL223C	COG1	0.363061	0.692423	1.00832	-1.21681	-0.116253	1.02584
YGL225W	VRG4	-2.03943	0.233672	1.12527	-2.61891	-0.820797	0.916141
YGL226C-A	OST5	0.310171	0.357387	-0.682785	0.200049	0.420208	-0.85561
YGL226W	MTC3	0.933769	0.823731	0.699209	0.104117	0.601814	0.153227
YGL227W	VID30	-9.08746	-10.6777	-10.6817	-6.8413	-10.2761	-10.5976
YGL228W	SHE10	0.645093	0.088978	-0.138162	0.656487	0.114898	-0.31186
YGL229C	SAP4	0.591137	-0.140944	-0.121686	0.224512	-0.0994012	-0.736557
YGL231C	EMC4	-0.169594	0.0192479	-0.472224	0.135978	0.256232	-1.12795
YGL232W	TAN1	0.299837	-0.569195	0.500096	0.74366	-0.174149	0.71643	yes
YGL233W	SEC15	0.499838	-0.252853	0.084082	-0.177876	-0.528633	-0.358203
YGL234W	ADE5,7	-0.376656	-0.368243	-0.67045	0.295974	0.536855	0.256502	yes
YGL237C	HAP2	-0.0874628	-0.179868	-0.127089	0.436889	-0.215428	-0.587758
YGL238W	CSE1	0.139752	0.378241	-0.523068	1.14359	0.917401	-0.536891	yes
YGL240W	DOC1	-0.737442	-0.10549	-0.497334	-0.807018	-0.149703	-0.692349
YGL241W	KAP114	0.754094	0.596819	-0.440035	0.45759	0.930058	-0.122639
YGL244W	RTF1	-1.67076	-0.610506	-0.365396	1.26157	1.57646	2.44713	yes
YGL245W	GUS1	-1.07437	-0.494084	-0.105193	-2.45664	-0.117515	-0.289248
YGL246C	RAI1	0.497143	0.242086	-0.360555	-0.232323	-0.0635312	-0.771671
YGL247W	BRR6	0.680569	0.60219	0.195113	0.46836	0.790576	-0.331759
YGL248W	PDE1	-0.102054	-0.36833	0.255486	-0.230739	-0.672808	0.406131
YGL250W	RMR1	-0.18861	NA	-0.450456	0.197007	NA	-0.572447
YGL252C	RTG2	-0.977197	-0.00794875	0.381717	-1.70745	0.351409	0.746709
YGL253W	HXK2	-0.323697	-0.0177237	0.297748	2.689	2.50646	2.1504	yes
YGL254W	FZF1	0.868007	0.568441	-1.75242	1.24288	0.818611	-1.31034
YGL255W	ZRT1	0.477957	0.114257	-0.213054	0.235513	0.550424	-0.277915
YGL256W	ADH4	0.650561	-0.236781	0.115694	0.459554	-0.493738	-0.0184884
YGL257C	MNT2	0.422396	0.538249	0.384363	0.0685244	-0.0227799	0.2665
YGR001C	#REF!	-0.148863	-0.0871326	-0.123257	0.12063	0.229687	0.0516691
YGR002C	SWC4	-0.761447	-1.84538	-0.12271	-0.287259	-1.72011	0.247025	yes
YGR003W	CUL3	0.179324	-0.549725	0.0359988	-0.0701796	-0.215428	0.068637
YGR004W	PEX31	0.476051	-0.340098	0.0815347	0.323046	-0.698696	-0.44784
YGR005C	TFG2	0.0583034	-0.554985	-0.694921	0.318415	-0.69398	-1.28028
YGR007W	ECT1	0.468533	-0.170151	0.17191	0.591695	-0.0556798	0.437217
YGR008C	STF2	-0.0330846	0.369404	-10.6817	0.950946	1.11351	-10.5976	yes
YGR010W	NMA2	-10.6724	-9.09276	-10.6817	-10.0112	-3.63227	-10.5976
YGR012W	#REF!	0.422312	0.39776	-0.820591	0.765206	0.618693	-2.02773
YGR013W	SNU71	-0.873835	0.287985	-0.310679	0.0800609	0.616016	0.67516	yes
YGR014W	MSB2	0.682926	0.334206	-0.730393	0.684871	0.0253718	-1.72722
YGR016W	#REF!	-0.389405	-0.734406	-0.493354	-0.329031	-0.761022	-0.846773
YGR017W	#REF!	0.11221	NA	-0.0957762	0.389652	NA	0.242404
YGR019W	UGA1	-0.904241	-0.368243	0.605458	-0.8388	-0.560162	0.768189
YGR020C	VMA7	0.392975	0.412096	0.0680122	0.0775052	0.345095	-0.15773
YGR021W	#REF!	-0.627469	0.18437	0.226822	-0.940513	-0.276279	-0.0485718
YGR023W	MTL1	-0.0100304	-0.037094	-0.054665	-0.317212	-0.00755339	-0.438911
YGR024C	THG1	0.642158	-0.363703	0.908909	0.785624	-0.843583	0.591002
YGR026W	#REF!	0.00617451	0.332469	-0.672249	-1.0122	0.118372	-0.526167
YGR027C	RPS25A	-0.533532	-0.426689	0.13382	-1.72666	-0.930149	-0.875694
YGR028W	MSP1	0.43871	0.59491	-0.186822	0.187218	0.421712	-0.17868
YGR030C	POP6	0.320513	-10.6777	0.216168	0.939329	-10.2761	0.402413	yes
YGR031W	IMO32	0.0193182	0.422943	0.289147	-0.165737	0.413874	-0.119829
YGR032W	GSC2	0.024073	-0.236781	-1.04298	-0.501713	-0.442929	-1.22198
YGR033C	TIM21	0.399037	0.214064	-0.066048	-0.228229	0.108659	-0.284704
YGR034W	RPL26B	0.538365	0.0855734	-0.972963	0.125306	-0.342796	-1.6983
YGR036C	CAX4	-0.415831	0.778587	0.483947	-1.11076	0.71342	0.424498
YGR037C	ACB1	-0.065095	-1.00706	0.304164	0.795322	-1.03295	0.313805
YGR038W	ORM1	1.3334	NA	0.503994	0.564576	NA	0.561918
YGR040W	KSS1	-0.188368	0.762153	0.619982	-0.932763	1.0381	0.811897
YGR041W	BUD9	-0.607025	1.09703	0.655665	-0.842878	0.932527	0.553598
YGR042W	#REF!	-0.19872	0.290227	0.627799	-0.527411	-0.0593785	0.709614
YGR043C	NQM1	0.568848	1.15908	0.59216	0.632312	1.03443	0.512122
YGR046W	TAM41	0.677409	NA	0.183282	0.225983	NA	-0.0107473
YGR047C	TFC4	-0.567827	-1.58496	-1.51929	-0.765675	-1.89675	-1.52077
YGR048W	UFD1	-0.378954	NA	0.387772	-0.26976	NA	0.845356	yes
YGR049W	SCM4	-0.914526	-0.827616	-0.0943019	-1.66544	-1.27286	-0.199309
YGR052W	FMP48	-1.11784	-0.146338	-1.76879	-1.56002	-0.255144	-1.83604
YGR055W	MUP1	-0.647286	-0.460974	-0.913493	-1.77282	-0.575685	-1.16713
YGR056W	RSC1	0.184	0.27793	0.017027	1.09075	0.0230836	0.637829	yes
YGR057C	LST7	-0.160673	-0.0871326	-1.03242	-0.430027	-1.5482	-1.12795
YGR058W	PEF1	-0.104099	0.464806	-0.197358	-0.560209	0.38314	-0.105409
YGR060W	ERG25	-0.170044	-0.0464018	-0.202764	0.181128	-0.140331	-0.168701
YGR061C	ADE6	-0.900242	-0.0177411	-0.271529	1.48485	1.80762	1.83508	yes
YGR062C	COX18	0.0881626	-1.17219	0.0251883	-1.21342	-1.19318	0.0890469
YGR063C	SPT4	-0.35369	-0.477402	-0.426059	6.07322	5.01828	5.90477	yes
YGR065C	VHT1	0.713437	0.190331	-0.052321	0.769313	-0.137853	-0.314499
YGR068C	ART5	1.07692	0.289466	0.395853	0.471284	0.294549	0.0611454
YGR071C	ENV11	-0.31528	-1.04547	0.162692	0.192982	-0.912316	0.407978
YGR072W	UPF3	-1.93258	0.0432017	-0.169572	-3.11953	0.287622	-0.261076
YGR074W	SMD1	0.329686	0.603631	0.436615	0.347424	1.34913	1.17802	yes
YGR075C	PRP38	-0.52014	-0.041095	-0.437314	0.401343	0.412126	-0.286974
YGR076C	MRPL25	0.779273	0.94329	-0.17913	0.23487	0.769739	-0.668794
YGR077C	PEX8	-0.0697231	-0.474886	-0.317699	-0.490293	-0.491088	-0.796982
YGR078C	PAC10	0.105652	0.311675	-10.6817	0.372477	0.345927	-10.5976
YGR080W	TWF1	0.622195	0.828588	0.925653	0.869887	1.19961	1.33905	yes
YGR081C	SLX9	-0.676835	-0.432779	-0.547343	0.36107	-0.0903497	0.18697
YGR082W	TOM20	0.154123	-0.249359	0.66705	-0.329989	0.284208	0.143037
YGR083C	GCD2	0.616816	-1.63136	0.598389	0.355806	-2.27742	-0.1756
YGR084C	MRP13	0.384249	0.130045	0.00657265	-0.123937	0.359847	-0.183924
YGR085C	RPL11B	-1.13931	0.199411	0.128664	-1.44734	-0.0246945	0.128793
YGR086C	PIL1	0.874951	0.621488	-0.174874	0.827977	0.581079	-0.803171
YGR087C	PDC6	0.88743	0.99956	-0.0405291	0.988068	0.859585	-0.350846
YGR088W	CTT1	0.306327	0.506776	-0.417235	-0.471459	-0.283138	-0.266959
YGR089W	NNF2	0.707635	0.497839	0.206576	0.578199	0.541627	0.0740006
YGR090W	UTP22	-0.515078	-0.757367	-0.357497	-1.88711	-1.39043	0.000465461	yes
YGR091W	PRP31	0.360998	-0.0347654	-0.671849	0.796128	-0.818744	-0.435196
YGR092W	DBF2	0.482227	0.821687	-0.292123	0.0685244	0.82766	-0.594794
YGR093W	#REF!	-1.46755	0.989564	0.17191	-1.26763	1.70073	1.01583
YGR094W	VAS1	-0.160437	-0.00498184	NA	-0.300495	0.269768	NA
YGR095C	RRP46	-0.377805	-0.390007	-0.44686	-0.772823	-0.52961	-0.816227
YGR097W	ASK10	-0.217098	0.571394	-0.162041	-1.09535	0.826507	-0.386916
YGR098C	ESP1	-0.148863	0.0937698	0.486994	-0.372791	-0.066671	0.367476
YGR099W	TEL2	-0.377805	0.262594	-1.36653	-0.392842	0.170959	-1.48645
YGR100W	MDR1	0.51923	0.661132	0.240429	0.416723	0.186156	0.120931
YGR101W	PCP1	0.728454	0.270648	0.6363	0.476613	-0.393481	0.43239
YGR102C	GTF1	0.0203233	0.427641	0.343412	-1.0762	0.249315	0.441732
YGR103W	NOP7	-3.18861	-0.982491	-1.3575	-3.42626	-0.372243	-0.96641	yes
YGR104C	SRB5	-0.518873	-0.429792	0.45339	-0.566212	-0.348346	-0.151538
YGR105W	VMA21	1.1704	0.645031	-1.05076	0.764502	0.306782	-2.13066
YGR106C	VOA1	0.482227	0.0898279	-0.310679	0.127778	-0.172871	-0.377165
YGR108W	CLB1	0.358492	-0.901701	0.650878	0.160749	-0.922989	0.416262
YGR111W	#REF!	0.244201	-0.566584	-0.152247	0.125764	-1.22084	-0.347289
YGR112W	SHY1	-0.463602	-0.962073	0.134677	-0.79526	-0.681844	0.0844339
YGR116W	SPT6	-0.630413	-1.48497	-0.308346	5.90123	3.43046	5.5983	yes
YGR117C	#REF!	-0.169594	0.468849	0.0732098	-0.511381	0.500309	-0.42516
YGR118W	RPS23A	0.428894	-0.0293621	-0.265936	0.334178	0.250375	-0.459315
YGR119C	NUP57	-0.157711	-0.663699	-0.285073	-0.725825	-0.436921	-0.775813
YGR120C	COG2	-0.212994	-0.224449	0.132104	-0.351231	-0.264897	-0.0506926
YGR121C	MEP1	-0.302309	0.0727341	0.355232	-0.726656	0.100038	0.184816
YGR122W	#REF!	0.189437	-0.63743	0.359297	-0.092364	-0.960975	-0.102731
YGR123C	PPT1	-0.0476299	0.376885	0.124066	0.0972972	0.323788	-0.082873
YGR124W	ASN2	-0.744647	0.288786	-0.00219756	0.378942	1.7372	1.00233	yes
YGR128C	UTP8	0.141356	-1.0575	0.372248	0.148644	-1.41504	0.659211
YGR129W	SYF2	0.0389751	-0.134974	-1.41975	0.0267421	-0.250284	-1.82708
YGR130C	#REF!	-0.0857979	-0.675452	0.195113	-0.261146	-0.772236	-0.00245148
YGR132C	PHB1	-0.682935	-0.357863	-0.609162	-0.689181	-0.193183	-1.16595
YGR133W	PEX4	-0.30819	-0.409772	-0.0497861	-0.380808	-1.10749	-0.104092
YGR134W	CAF130	0.169139	0.147239	-0.19183	0.0041878	-0.320474	-0.827749
YGR135W	PRE9	-0.802061	-0.549725	-0.249136	0.199444	0.367732	0.2635
YGR140W	CBF2	0.809374	-0.163992	-0.177852	0.958159	-0.401143	-0.00980952
YGR141W	VPS62	0.350301	0.395006	1.08763	0.253103	0.388186	0.851802
YGR142W	BTN2	0.878919	0.0536941	0.235641	0.467384	-0.45063	0.139951
YGR143W	SKN1	0.28539	0.0388072	0.456777	0.055597	-0.565786	0.365832
YGR146C	ECL1	0.362374	-0.122172	0.407111	-0.071648	-0.316122	0.307048
YGR147C	NAT2	-0.592598	-0.467365	0.162692	-1.28397	-0.861812	0.109624
YGR148C	RPL24B	-0.471527	-0.776853	-0.417235	-0.439475	-0.363235	-0.804797
YGR149W	#REF!	-0.174335	0.750376	0.23644	-0.298834	0.757536	-0.176984
YGR150C	CCM1	1.1002	NA	-0.125788	0.347345	NA	-0.866733
YGR152C	RSR1	1.05876	1.38084	0.396568	0.328123	1.23498	-0.301257
YGR155W	CYS4	0.0799553	0.579668	0.566843	0.769313	1.78085	0.801691
YGR156W	PTI1	-0.458361	0.217411	0.0849696	1.51065	1.7068	2.19019	yes
YGR157W	CHO2	0.956513	0.795356	0.570143	0.604178	0.619698	0.163105
YGR158C	MTR3	0.703157	-0.142444	-0.0967152	1.19884	0.0161972	0.0326801
YGR159C	NSR1	-1.76145	-1.28444	-0.691878	1.1413	0.516173	2.41167	yes
YGR161C	RTS3	0.42758	0.512105	-0.242886	0.484628	0.457738	0.0871616
YGR162W	TIF4631	0.447813	0.924979	-10.6817	0.371397	0.617935	-10.5976
YGR163W	GTR2	0.291193	1.29992	1.14606	0.227177	1.35914	0.762711
YGR165W	MRPS35	0.128475	-0.0796671	0.23644	0.311828	0.123688	0.212181
YGR166W	TRS65	0.540679	0.387023	0.446961	0.514294	-1.13657	0.242404
YGR167W	CLC1	-0.47398	-0.573121	0.00131693	-0.553846	-0.459141	-0.396688	yes
YGR169C	PUS6	0.0857979	0.42097	0.0765456	-0.349449	0.509328	-0.0967452
YGR171C	MSM1	0.103185	-0.258813	0.0963995	-0.271447	-0.154591	-0.0691329
YGR173W	RBG2	-0.698299	1.01574	0.00375947	-1.46213	0.780195	0.0446168
YGR174C	CBP4	0.570131	0.497198	0.229233	0.194163	0.314375	0.19341
YGR175C	ERG1	1.38315	1.30492	0.326251	1.65134	1.23538	0.936788
YGR177C	ATF2	-0.928954	-0.117211	0.327001	-1.92762	-0.00850036	0.200888
YGR178C	PBP1	0.55037	0.0830003	0.314796	0.805756	-1.22628	0.108045
YGR179C	OKP1	-0.200349	0.173187	-0.095307	-0.10785	0.0991589	0.390333
YGR180C	RNR4	0.664081	0.0704732	0.0282677	0.925411	0.31259	0.228961
YGR183C	QCR9	-0.212431	0.67479	-0.135059	-1.11076	0.587472	-0.561879
YGR185C	TYS1	0.759727	0.535133	0.18273	0.40454	0.405353	-0.0935994
YGR186W	TFG1	-0.988149	0.0396872	0.107856	0.431809	0.821811	1.33994	yes
YGR187C	HGH1	-0.486311	0.225409	0.304164	-0.0570309	0.0592659	0.503732
YGR188C	BUB1	0.440014	0.107733	-0.216111	0.363812	-0.30171	-0.0192143
YGR189C	CRH1	0.243454	-0.206044	0.70634	0.15995	-0.956452	0.339051
YGR191W	HIP1	0.459561	-0.52215	-0.0793102	0.146188	-0.898206	-0.298242
YGR192C	TDH3	-1.07573	-1.99233	-0.980371	5.68397	3.3316	5.18509	yes
YGR193C	PDX1	0.212499	0.0112588	-0.672249	0.303183	-0.622648	-1.11466
YGR194C	XKS1	0.182615	-0.493861	-0.0983262	0.216403	-0.431453	0.305671
YGR195W	SKI6	0.223907	0.310255	-0.0967152	0.745329	0.506874	0.439273
YGR196C	FYV8	1.04591	0.497198	0.165212	0.59259	0.155201	0.0821219
YGR198W	YPP1	0.159674	0.105279	0.171632	-0.525398	-0.304581	-0.0468403
YGR200C	ELP2	0.0149503	0.126411	0.43011	0.144856	-0.549906	0.574215
YGR201C	#REF!	0.706468	0.200985	0.225213	0.030711	-0.0537236	-0.00983101
YGR202C	PCT1	-0.0358007	0.494083	0.263034	-0.241389	0.916168	0.49517
YGR203W	YCH1	NA	0.0348074	-0.673249	NA	0.259151	-0.491679
YGR204W	ADE3	-0.0597666	0.479148	-0.754005	2.52948	2.17431	1.338	yes
YGR205W	TDA10	0.697104	0.85206	-0.522798	0.809859	0.625203	-0.100148
YGR206W	MVB12	0.0588937	0.929611	NA	0.0358967	-0.172837	NA
YGR207C	CIR1	-0.152789	0.685868	-0.262771	-0.310788	0.813988	-0.0613398
YGR208W	SER2	-0.317651	-0.491316	0.70326	0.253103	-0.16969	1.6272
YGR209C	TRX2	-1.89669	-1.32691	-0.731955	-1.05642	-0.512422	0.802799	yes
YGR210C	#REF!	0.525857	0.274592	-0.0556427	0.827458	0.470688	-0.190897
YGR211W	ZPR1	-0.283332	-0.249359	-0.316449	1.1187	0.869808	0.837041	yes
YGR214W	RPS0A	0.164043	-0.162035	-1.30369	0.472257	-0.0903497	-1.58007
YGR218W	CRM1	-0.0254501	-0.792736	-0.691878	1.38607	-0.0333421	0.493104
YGR220C	MRPL9	NA	0.606354	0.405833	NA	0.342127	0.235628
YGR221C	TOS2	0.387163	0.127564	-0.514708	-0.214989	0.223737	-0.57459
YGR222W	PET54	0.890776	0.657123	NA	0.916664	0.66732	NA
YGR229C	SMI1	-0.380703	-1.00317	0.264915	-0.548319	-0.761022	-0.442236
YGR231C	PHB2	0.0366585	0.431458	-0.564035	-0.0497776	0.497015	-0.596179
YGR232W	NAS6	0.294801	0.170903	0.017027	0.394978	-0.170216	-0.143288
YGR233C	PHO81	-0.0657322	0.0290921	-1.09229	0.22682	0.359847	-1.16046
YGR234W	YHB1	-0.335558	-0.309997	-0.154829	1.53647	0.708818	1.1832	yes
YGR235C	MOS2	-2.97894	-1.92953	-0.152247	-4.58496	-3.38131	-0.779005
YGR237C	#REF!	0.678514	-2.35579	0.0274062	0.831909	-3	0.0525672
YGR238C	KEL2	0.213271	-0.476821	-0.165978	0.0735811	-0.967785	-0.60182
YGR240C	PFK1	-1.18057	-0.104072	0.225213	-0.91583	0.905028	1.14304
YGR241C	YAP1802	0.613555	-0.238928	-0.244966	0.678771	-0.092489	-0.470883
YGR243W	FMP43	0.201788	-1.70618	0.246841	0.154936	-3.17809	0.200074
YGR245C	SDA1	-1.94111	-1.93963	-2.31099	-0.780006	-1.96779	-2.6089
YGR246C	BRF1	-0.518454	0.0667031	0.128664	-0.600567	0.396079	0.419928
YGR247W	CPD1	0.383535	-0.465831	0.475669	0.291412	-0.866733	0.319785
YGR248W	SOL4	0.598072	-0.427905	-2.32475	0.629697	-0.501716	-2.27139
YGR250C	#REF!	-0.55715	-0.744975	-0.691878	-0.88712	-0.601061	-1.0123
YGR251W	NOP19	-0.165766	0.904689	-0.0595605	0.0762257	1.0788	-0.149556
YGR252W	GCN5	-0.148781	0.346049	0.31419	0.215241	0.796552	0.613259	yes
YGR253C	PUP2	-0.728445	-0.39927	-0.379039	0.164946	0.424315	0.498469
YGR254W	ENO1	-0.301738	-0.129861	-0.583646	1.71882	2.02737	1.05526	yes
YGR255C	COQ6	0.518017	0.623777	0.321137	0.0735811	0.415619	0.457695
YGR256W	GND2	0.0503822	-0.0320612	0.234948	-0.0512253	-0.107452	0.168113
YGR257C	MTM1	0.259381	0.377015	0.662816	-0.365079	0.29685	0.0230836
YGR258C	RAD2	-0.886098	-0.233588	-0.0362122	-0.956138	0.0381024	0.2665
YGR260W	TNA1	0.832096	-0.297718	-0.233414	0.620948	-0.393849	-0.452254
YGR261C	APL6	0.0622843	0.00263988	0.42161	-0.474009	0.261094	0.168113
YGR262C	BUD32	-10.5656	-0.8916	-0.744514	-10.062	-0.517806	-0.465722
YGR263C	SAY1	0.235216	-0.115477	0.350368	0.509391	-0.418143	-0.0623117
YGR264C	MES1	0.594293	0.812963	0.309642	0.0698108	0.841915	-0.481025
YGR266W	#REF!	-0.247035	-0.554985	-0.124761	-0.277411	-0.962815	-0.624695
YGR267C	FOL2	0.17228	-1.16005	-0.219175	0.222392	-2.27612	-0.324957
YGR269W	#REF!	-0.194667	0.365308	-0.235628	-0.574516	0.584963	-0.606065
YGR270W	YTA7	-0.112308	-0.297718	-0.232308	1.05949	0.200159	0.739657	yes
YGR271C-A	EFG1	-1.55608	-0.328991	-0.434937	-2.13471	-0.0630202	-1.04492
YGR271W	SLH1	-1.14562	0.540738	0.312676	-2.24826	0.664352	-0.407708
YGR274C	TAF1	-0.28249	-0.135967	-0.0170399	-0.335828	-0.112577	0.662836
YGR275W	RTT102	0.0371207	-0.0204899	0.282818	1.23888	0.473404	0.677459
YGR277C	CAB4	0.695535	-0.261978	0.260104	0.0854879	-0.329218	0.489876
YGR278W	CWC22	-0.67076	0.479148	0.297441	-1.18246	0.81219	0.397789
YGR279C	SCW4	0.515905	0.367234	0.206576	0.0646583	0.181181	0.471185
YGR280C	PXR1	-0.046925	0.0423239	-0.403477	0.0529975	0.386026	0.258332
YGR281W	YOR1	-0.479442	-0.920404	-0.0634888	-0.329031	-1	-0.558268
YGR282C	BGL2	0.466486	0.786316	0.32605	0.550061	0.766219	-0.082873
YGR283C	#REF!	0.0435366	-0.166955	0.429458	0.123199	0.0333519	0.82132
YGR284C	ERV29	0.381328	NA	-0.0313952	-0.264385	NA	-0.445568
YGR285C	ZUO1	0.234465	-0.346803	0.450822	0.18353	-0.168907	0.12522
YGR286C	BIO2	0.519894	0.509319	0.247581	0.0813371	0.588098	-0.196499
YGR287C	IMA1	0.284609	-0.151953	0.463618	0.210584	-0.56718	0.267518
YGR292W	MAL12	-0.128867	-0.378873	-0.982229	-0.368559	-0.985011	-1.34104
YGR296W	YRF1-3	0.782597	0.323826	-0.617801	0.0280663	-0.102431	-0.119975
YHL001W	RPL14B	0.671034	0.00766553	-0.629401	1.12901	-0.148659	-0.130661
YHL002W	HSE1	0.135728	-0.199962	0.516548	0.297703	0.139899	0.594727
YHL003C	LAG1	-0.224309	-0.758856	-0.765798	-0.0182889	-2.03772	-1.65801
YHL004W	MRP4	-2.12679	1.26747	0.783634	-2.49219	0.997644	0.547746
YHL007C	STE20	0.179324	0.261125	0.228965	-0.19905	0.461968	-0.114779
YHL008C	#REF!	0.609971	0.491421	0.528994	0.384003	0.15858	0.19662
YHL009C	YAP3	0.161255	0.0830003	-0.154201	0.0907484	0.608046	-0.0201582
YHL013C	OTU2	-0.657186	-2.44997	-0.0151366	-0.429051	-2.75465	-0.204944
YHL014C	YLF2	-0.318838	0.020203	-0.269259	-1.22284	0.0626556	-0.954196
YHL017W	#REF!	0.799104	-0.636978	0.391555	0.88851	-1.18674	0.0936451
YHL018W	#REF!	-10.5656	-10.6398	-10.5821	-10.062	-10.5812	-2.20777
YHL019C	APM2	0.423631	0.785294	0.1305	0.311828	1.12155	0.37036
YHL020C	OPI1	0.0461075	-0.332314	-0.560144	0.143591	-0.820797	-0.550463
YHL021C	AIM17	0.63532	-1.07374	0.0814161	0.133941	-1.61542	-0.193695
YHL025W	SNF6	-1.08782	-0.00770648	-0.43621	-0.917388	-0.0208677	0.276646
YHL026C	#REF!	0.841302	0.614027	-0.029729	0.892655	0.630015	-0.151538
YHL027W	RIM101	0.256093	-0.127935	-0.451657	-0.0983379	-1.19931	-1.32379
YHL028W	WSC4	0.0665083	-10.6398	0.392273	-0.802303	-10.5812	0.275634
YHL029C	OCA5	0.586073	-0.278946	0.0261128	0.322738	-0.371747	0.178337
YHL030W	ECM29	0.304139	-10.6777	0.411079	0.968198	-10.2761	0.995804	yes
YHL033C	RPL8A	-0.532874	-0.497811	-0.00572062	-0.319484	-0.0887723	0.142194
YHL034C	SBP1	-1.33196	-0.194778	0.072494	-1.14916	-0.327353	-0.00245148
YHL038C	CBP2	-0.182954	-0.301057	0.058103	-0.211859	-0.137221	0.152126
YHL039W	EFM1	0.0988691	0.835434	-0.617801	-0.519014	1.10223	-0.893785
YHL040C	ARN1	0.646682	-0.182864	0.454032	0.458415	-0.488222	0.365309
YHL048W	COS8	-0.529405	0.388804	0.208207	-0.932763	0.232581	0.704015
YHR001W	OSH7	0.580991	-0.0306142	0.175248	0.527605	0.133903	0.301702
YHR001W-A	QCR10	1.02267	0.459555	1.00564	0.961015	0.239776	0.659739
YHR003C	TCD1	0.812175	-2.34517	0.176081	0.621826	-2.44165	0.178337
YHR004C	NEM1	0.0872668	0.198623	0.220374	-0.287259	-0.0218235	-0.773764
YHR005C	GPA1	-10.6724	-10.6777	-9.68168	-10.0112	-10.2761	-10.5976
YHR006W	STP2	-0.000476058	0.0343994	0.140666	0.384003	-0.154936	0.704767
YHR007C	ERG11	0.0259442	-0.710534	0.267263	0.422777	-0.914089	0.279676
YHR008C	SOD2	-0.598352	-0.027846	-0.148557	-1.06205	-0.25702	-0.183924
YHR009C	TDA3	0.680569	0.14811	-0.0943019	1.09783	0.115767	-0.997553
YHR010W	RPL27A	-5.14886	-3.30268	-10.6817	-4.65368	-1.90544	-10.5976
YHR011W	DIA4	-1.11643	-0.369498	-1.37025	-1.64419	-0.388908	-0.714284
YHR012W	VPS29	0.748588	-0.954912	-0.618283	0.719243	-0.468769	-0.876488
YHR013C	ARD1	0.759072	0.283006	-0.252271	0.686609	0.410376	-0.681708
YHR015W	MIP6	0.647526	-1.31112	0.0196288	0.0386162	-2.8947	-0.137381
YHR016C	YSC84	0.685676	0.517653	0.210865	0.798541	0.692542	-0.0088724
YHR018C	ARG4	-0.171583	0.330008	0.755034	-0.811555	0.819273	1.12863
YHR021C	RPS27B	-0.735787	-1.17191	-0.948662	-0.231508	-0.438496	-0.946535	yes
YHR023W	MYO1	-0.561358	-0.645439	-0.174874	-1.32058	-0.713922	-0.432286
YHR024C	MAS2	0.509232	0.501676	-0.452859	-0.262765	0.258003	-0.469109
YHR025W	THR1	0.591137	NA	0.285137	0.689498	NA	1.00184
YHR027C	RPN1	-1.06374	-0.0186568	0.240429	0.999325	1.26781	1.96467
YHR029C	YHI9	-0.150825	-0.475596	0.321137	-0.385518	-1.18601	0.0967708
YHR030C	SLT2	-0.0918724	-0.161023	-0.0237213	-0.00135021	-0.117676	0.247025
YHR031C	RRM3	-0.00708942	0.579668	-0.206958	-0.0325168	0.472907	0.209768
YHR034C	PIH1	-10.6724	-10.6777	-10.6817	-10.0112	-5.18866	-6.34966
YHR035W	#REF!	0.749005	-0.180361	-10.5821	0.458573	-0.603921	-10.2021
YHR036W	BRL1	-0.0627463	-1.23678	0.00188096	-0.592404	-0.948205	-0.21486
YHR037W	PUT2	0.819745	0.15381	-0.116576	0.440786	-0.332087	-0.0359607
YHR038W	RRF1	0.169131	-0.438894	0.0490351	-0.917388	-1.32617	0.352465
YHR039C	MSC7	-10.6724	-10.6777	-10.6817	-5.61891	-6.46877	-10.5976
YHR039C-A	VMA10	-3.0342	-1.59813	-1.42732	-2.88214	-2.17181	-1.20494
YHR040W	BCD1	-0.360677	-0.460974	0.214655	-0.415037	-0.127648	0.144722
YHR041C	SRB2	0.0926333	-0.922116	-0.314185	0.00269663	-1.03045	-0.123973
YHR042W	NCP1	0.365898	-0.357863	0.270388	0.440786	-0.468761	0.797172
YHR043C	DOG2	-0.384426	-0.999548	-0.548719	-0.769725	-1.24135	-0.442236
YHR044C	DOG1	0.434138	0.526852	0.239419	-0.305595	0.558347	-0.507475
YHR046C	INM1	0.557595	0.774522	0.782357	0.679644	0.755232	0.777995
YHR047C	AAP1	-0.121599	-1.02692	0.412918	1.06013	-0.430184	1.15378
YHR049W	FSH1	-1.33196	-0.0919344	NA	-0.740118	-0.0151465	NA
YHR051W	COX6	1.2125	0.266346	0.413625	0.89868	0	0.472951
YHR052W	CIC1	-0.855442	-0.563977	0.24536	-1.19745	0.327502	0.467156
YHR053C	CUP1-1	-0.25774	-0.170916	0.207826	-0.517372	-0.0987049	0.137969
YHR055C	CUP1-2	-1.11643	-0.153964	0.217949	-1.24506	-0.287729	0.343806
YHR057C	CPR2	-0.922556	-0.23167	0.776216	-2.32473	0.0253718	0.775822
YHR058C	MED6	-0.361007	-0.979797	0.029805	-0.379052	-0.794931	0.831299
YHR059W	FYV4	0.303423	-0.752907	0.24165	-0.305595	-0.784271	0.267373
YHR060W	VMA22	-0.623064	0.559879	0.0751765	-1.89714	0.500948	0.0242884
YHR061C	GIC1	0.129283	0.428189	-0.564035	0.61904	0.841519	-0.895414
YHR062C	RPP1	0.324686	-0.213528	-0.361764	1.15349	0.231779	-0.63607
YHR063C	PAN5	0.0881626	-0.710534	0.235641	0.850095	-0.481853	0.409823	yes
YHR064C	SSZ1	-0.367133	-1.43522	-0.391083	0.0826121	-1.14866	-0.645618
YHR066W	SSF1	-0.598352	-0.334871	0.39012	-0.279048	-0.157034	0.816772
YHR067W	HTD2	0.253004	1.34534	0.797778	-0.0919402	1.31589	0.629183
YHR068W	DYS1	0.0140752	-0.256707	0.279772	1.00975	0.883747	1.14177	yes
YHR069C	RRP4	-0.0607591	-0.972681	-0.136093	0.324894	-0.484485	0.00854752
YHR070W	TRM5	-1.76253	0.334206	0.884852	-2.22987	0.855733	0.971794	yes
YHR072W	ERG7	-0.799049	-0.294388	0.749335	-1.20718	-0.61686	0.867326
YHR073W	OSH3	-0.988149	0.96337	0.532902	-0.882137	0.778549	0.115289
YHR074W	QNS1	0.459561	0.727622	-0.111483	-0.17635	0.898074	-0.152275
YHR077C	NMD2	0.127666	-0.0927571	-2.18982	0.227177	-0.790295	-3.40776
YHR079C	IRE1	-1.73873	0.0502008	-0.255413	-1.99442	-0.201983	-0.520771
YHR080C	#REF!	-0.0989918	0.282792	0.0149794	-1.15516	0.10705	-0.419126
YHR082C	KSP1	-0.0332222	-0.0306142	0.151721	0.187067	-0.451918	-0.0574656
YHR083W	SAM35	-0.157711	0.332109	-0.106138	-0.302143	0.307899	-1.05649
YHR084W	STE12	-0.317651	-0.162035	0.355967	-0.00812026	0.264289	0.674393
YHR085W	IPI1	-0.545721	0.0970674	-0.0378215	-0.876801	0.787945	-0.235643
YHR086W	NAM8	-0.189617	-0.0666948	-0.0243592	0.534703	-0.103697	-0.029631	yes
YHR087W	RTC3	-0.229072	-0.658226	-0.322399	0.391224	-0.129989	0.233546
YHR088W	RPF1	-3.40564	-0.39579	-0.988191	-4.42626	-0.0485085	-1.24224	yes
YHR089C	GAR1	-1.06573	-2.2304	-2.06251	1.3399	-0.896452	-0.0397325	yes
YHR090C	YNG2	-0.806692	0.373489	-0.35975	-0.664714	-0.0521227	-0.217126
YHR093W	AHT1	0.428068	0.553732	0.171075	-0.389621	0.343612	-0.1756
YHR094C	HXT1	0.21742	0.240556	0.414332	-0.00405441	0.134761	0.107353
YHR097C	#REF!	-0.123603	0.0671142	-0.0799069	0.15995	-0.041307	0.068637
YHR098C	SFB3	0.0974125	0.171685	0.313383	-0.466263	0.365927	0.221794
YHR101C	BIG1	-0.516342	0.0954196	-0.0724989	-2.05123	0.0681715	-0.133041
YHR102W	KIC1	0.654195	0.336055	0.57141	0.0965636	0.14757	0.145498
YHR103W	SBE22	0.215557	-10.6777	0.647558	-0.0197054	-10.2761	0.738362
YHR104W	GRE3	0.350301	0.0396872	-0.582142	1.22162	-0.230261	-0.252297
YHR106W	TRR2	0.622195	-0.257759	0.319731	0.21398	-0.357261	0.192761
YHR107C	CDC12	0.343686	0.169338	-0.269108	-0.162604	0.267874	-0.46573
YHR108W	GGA2	0.74333	0.0606468	0.105234	0.686147	-0.492412	0.0446168
YHR109W	CTM1	0.555792	0.225409	-0.529393	0.0041878	0.323788	-0.334318
YHR110W	ERP5	0.735374	-1.05019	0.0547243	0.640721	-1.49149	0.0226328
YHR111W	UBA4	-0.994706	-1.29834	-9.09672	-0.841302	-1.43377	-10.5976
YHR112C	#REF!	0.774828	0.281304	0.444381	0.415712	0.161951	0.0517237
YHR113W	APE4	-0.816	0.0970674	0.559114	-2.34589	0.372233	0.775822
YHR114W	BZZ1	-0.293047	-0.530515	-0.216111	-0.749132	-1.00466	-0.438977
YHR115C	DMA1	0.297059	0.410056	-0.109451	0.54158	0.333932	-0.80338
YHR116W	COX23	0.857538	0.558652	0.492668	0.0280663	0.633726	0.410745
YHR117W	TOM71	-0.294115	-0.149945	0.107856	-0.293862	-0.215972	-0.110688
YHR118C	ORC6	-0.450838	-0.0456332	-0.306638	2.31661	2.912	2.41277	yes
YHR119W	SET1	-0.960099	-0.37535	-0.0218091	-0.691359	-0.0381688	0.665155	yes
YHR120W	MSH1	-1.25247	-0.480503	0.307007	-5.10434	-0.0497122	0.195203
YHR121W	LSM12	0.152098	-0.285544	0.190997	0.285575	0.0103218	0.523242
YHR122W	CIA2	0.7088	0.550032	0.519177	0.259882	0.524053	0.498316
YHR123W	EPT1	0.861391	-0.0392837	0.0623152	1.05082	0.151188	-0.380841
YHR127W	#REF!	-0.0160005	0.980045	0.312676	0.0682575	1.31913	0.408038
YHR129C	ARP1	-0.0322484	-0.303286	-0.0285127	-0.0341401	-0.959149	-0.0767104
YHR131C	#REF!	0.0890579	-0.487508	0.0177709	0.111631	-0.535441	-0.508637
YHR132C	ECM14	-0.288291	-0.217728	0.289763	-0.400268	-0.211603	-0.479316
YHR132W-A	IGO2	0.0774441	0.953457	-0.513006	0.454339	1.22173	-0.42641
YHR133C	NSG1	0.0588937	0.061217	0.57276	-0.131644	-0.387381	-0.134063
YHR135C	YCK1	-1.27368	-0.507795	-0.52686	-1.96683	-0.452757	-0.540949
YHR136C	SPL2	0.638382	-0.060477	0.00938036	0.850843	0.14842	-0.144132
YHR137W	ARO9	0.278343	0.880826	0.00563553	0.867952	1.36717	0.563577
YHR138C	#REF!	-0.0186837	0.22903	-0.22459	-0.612897	-0.067473	0.220992
YHR140W	#REF!	0.678191	0.571487	0.0955777	0.189436	0.282986	0.166383
YHR141C	RPL42B	0.667442	0.692244	0.314947	0.476143	0.49695	0.0901978
YHR143W	DSE2	0.308428	0.345342	-0.252271	0.460448	0.524775	-0.031533
YHR143W-A	RPC10	0.150942	0.571394	0.825621	-0.0282337	0.739291	1.05257	yes
YHR144C	DCD1	0.785361	0.67875	-0.0468666	0.672663	0.315889	-0.367653
YHR146W	CRP1	0.0401017	0.26186	0.752951	0.137249	0.211716	0.952679
YHR147C	MRPL6	-0.539283	-0.496567	-0.14543	-0.91583	-1.00466	0.224984
YHR149C	SKG6	0.435446	0.4236	-0.50925	0.635331	0.350497	-0.7474
YHR152W	SPO12	0.253129	0.359141	0.0342843	0.60624	0.398951	0.0462692
YHR154W	RTT107	-10.6724	-10.6777	-10.6817	-5.8413	-10.2761	-10.5976	yes
YHR155W	YSP1	0.614953	-0.0585923	-0.832273	0.525731	-0.225849	-1.14413
YHR156C	LIN1	-0.54321	-1.24533	0.0103151	-0.606719	-0.844799	0.225189
YHR158C	KEL1	-0.110183	-0.849583	0.17397	-0.489627	-1.01168	0.196016
YHR159W	TDA11	-0.118495	-0.712015	-0.375128	-1.19168	-0.643091	-0.484447
YHR161C	YAP1801	0.288511	-0.199962	-0.100343	-0.0135593	-0.369312	-0.122639
YHR162W	MPC2	-0.147884	-1.44171	-0.16795	-0.312523	-1.41194	-0.498239
YHR163W	SOL3	-0.0959363	-0.180361	0.249957	0.0990857	-0.263788	0.469417
YHR164C	DNA2	-0.523919	0.141567	-0.00660273	-0.671877	-0.0189582	0.313576
YHR165C	PRP8	0.365898	-0.572359	-0.600575	1.05365	-0.457079	-0.475906
YHR166C	CDC23	-0.592941	-0.11357	0.135306	-0.86148	-0.736966	0.405228
YHR167W	THP2	-0.291964	-0.0927571	-0.180836	0.339712	0.12155	-0.66685	yes
YHR168W	MTG2	-10.6724	-10.6777	-10.6817	-7.6893	-6.9542	-10.5976
YHR169W	DBP8	1.08458	-0.37535	-1.51875	1.00875	-1.04593	-2.69433
YHR170W	NMD3	-0.93941	-0.76184	-1.03422	-1.9132	-0.704372	-0.393016
YHR172W	SPC97	-0.548304	0.341176	0.268878	-1.38187	0.434682	0.0480714
YHR173C	#REF!	0.299382	0.383961	-0.0733568	0.00404305	0.441861	0.0774868
YHR174W	ENO2	-0.464916	0.0830146	0.153414	-0.751433	-0.0605819	0.0646627
YHR175W	CTR2	-0.418578	0.0696342	0.621532	-0.934412	0.140673	-0.399142
YHR178W	STB5	-0.1862	0.473949	-0.451571	-0.312177	0.546794	-0.427337
YHR179W	OYE2	-0.0303736	0.488443	-1.86469	0.398164	1.24253	-0.993961
YHR181W	SVP26	0.642046	0.813992	0.598389	0.436803	0.56664	0.32633
YHR182W	#REF!	-0.0707226	0.0103613	-0.747671	-0.193224	0.0991589	-1.17146
YHR183W	GND1	0.0418202	-0.103126	0.314089	4.89313	4.08397	4.64414	yes
YHR186C	KOG1	-0.153008	-0.949795	0.00750916	-0.230739	-1.24581	-0.565499
YHR187W	IKI1	-10.5656	-0.233588	-0.123735	-10.062	0.055424	-0.0435141
YHR188C	GPI16	NA	0.000452043	0.150873	NA	-0.756242	0.0728366
YHR189W	PTH1	-0.541824	0.416845	0.792354	-1.43999	-0.14553	0.200888
YHR190W	ERG9	-2.13513	-1.20725	-0.0246783	-2.96401	-1.93015	-0.661027
YHR192W	LNP1	0.206736	-0.712015	0.372781	-0.648418	-0.666815	-0.350375
YHR193C	EGD2	-0.559954	-0.635572	0.227626	-0.478963	-0.183526	0.54942
YHR194W	MDM31	-0.134081	-0.0113474	0.410796	0.0581917	0.303733	0.531739
YHR195W	NVJ1	0.135728	-0.939353	-2.18982	0.0698108	-1.11768	-3.17976
YHR196W	UTP9	-0.0687244	-0.289959	0.501337	-0.0300004	0.0572353	0.817467
YHR197W	RIX1	0.0974125	-0.422691	0.057259	0.837396	-0.229	0.659801
YHR198C	AIM18	-10.6724	-10.6777	-10.6817	-9.01123	-4.29884	-7.42766
YHR199C	AIM46	-0.529405	0.556809	0.526382	-1.76284	0.315132	0.362978
YHR200W	RPN10	-0.67076	-0.847003	-1.93829	-0.280686	0.00657693	-2.12531
YHR201C	PPX1	0.366494	-0.833799	0.209347	0.453318	-1.08383	0.367476
YHR203C	RPS4B	-0.93941	-0.827533	-1.11562	-1.30732	-1.28177	-0.668329
YHR204W	MNL1	0.00176693	0.0704732	-0.0985949	-0.00419999	0.633019	-0.356796
YHR205W	SCH9	-1.08984	-0.271286	-0.702559	-0.762838	-0.0704364	-0.728418
YHR206W	SKN7	-0.0367072	-0.0456332	-0.129969	-0.0760622	0.151188	0.204929
YHR207C	SET5	-1.44404	-1.20516	-0.536382	-0.857475	-1.40129	-0.45561
YHR208W	BAT1	0.577873	0.490326	-0.121345	0.102515	0.456891	0.00139593
YHR209W	CRG1	0.288301	-0.26939	0.735647	-0.344116	-0.375258	0.673292
YHR215W	PHO12	0.392975	0.672523	-0.361764	-0.0776277	0.518805	-1.05747
YHR216W	IMD2	-0.51301	-0.843753	0.204128	-0.123937	-0.143449	0.745513
YIL001W	#REF!	0.0932751	0.190331	-9.68168	-0.566212	0.114045	-10.5976
YIL002C	INP51	-0.591608	-0.032962	-0.458883	-0.499475	-0.39501	-0.633246
YIL004C	BET1	-10.6724	-10.6777	-10.6817	-6.5518	-9.27612	-6.27566
YIL005W	EPS1	-0.527767	-0.0796671	0.221451	-1.14704	-0.193975	0.28582
YIL007C	NAS2	-0.0503735	-0.251455	0.355183	0.411889	-0.643129	0.496491
YIL008W	URM1	-1.54572	-2.15024	-1.68168	-1.03109	-2.53466	-2.7521
YIL009W	FAA3	1.16447	0.896454	0.146629	0.797489	0.740728	-0.227709
YIL010W	DOT5	-0.300649	-0.0815299	-0.0154537	-0.321229	-0.112475	0.0023258
YIL014W	MNT3	0.238967	-1.22857	0.00569803	-0.466263	-0.914181	0.140505
YIL015W	BAR1	0.532146	-0.327886	0.244618	0.173648	0.196566	0.0198804
YIL016W	SNL1	0.54621	-0.196849	0.0112491	0.767677	-0.701617	-0.272865
YIL017C	VID28	-0.0781007	0.0738244	-0.0351189	-0.0938552	0.0219382	-0.764697
YIL018W	RPL2B	-0.364086	0.45478	0.0222259	-1.52741	0.474583	-0.377209
YIL020C	HIS6	-1.09311	-0.321268	-0.698684	-1.33527	-0.352797	-0.503509
YIL021W	RPB3	-2.07997	-0.960043	-0.993427	3.49086	5.00762	3.34328	yes
YIL024C	#REF!	-10.5656	-10.6398	-10.5821	-10.062	-6.77385	-10.2021
YIL026C	IRR1	-0.217957	-0.412177	-0.498663	2.74732	1.21118	2.33825	yes
YIL027C	EMC5	0.681162	-0.382405	0.286681	0.26775	-0.15284	0.639441
YIL030C	SSM4	0.837434	0.245141	0.369871	0.908779	-0.00566134	0.0529047
YIL031W	ULP2	-0.587617	-0.51911	-0.707263	-1.52741	-1.16499	-0.796687
YIL033C	BCY1	-0.0276677	0.125604	0.66705	-0.651478	-0.925185	0.54452	yes
YIL034C	CAP2	-0.122641	0.727954	-0.308813	-1.5559	0.901918	-0.579387
YIL035C	CKA1	0.394337	0.846822	-0.12613	0.968912	1.264	0.332411
YIL038C	NOT3	0.204092	-0.120256	0.336523	-0.184679	-1.22084	0.247903
YIL039W	TED1	0.0601307	0.426969	0.708453	-0.499804	0.256427	0.543551
YIL040W	APQ12	-0.332575	0.507156	-0.436125	-0.259683	0.6149	-0.452929
YIL041W	GVP36	0.503748	0.166201	-0.825252	0.594252	0.347757	-2.59196
YIL042C	PKP1	-1.53543	-0.127935	0.102957	-2.23644	-0.308898	0.291917
YIL043C	CBR1	-0.102054	0.25654	-0.0517356	-0.572198	0.608006	-0.410961
YIL044C	AGE2	0.516164	-0.485427	0.480714	1.01668	0.518291	0.745599
YIL045W	PIG2	-10.6724	0.409743	-0.0734228	-10.0112	-0.130192	-0.114779
YIL046W	MET30	-0.0807552	-0.4475	-0.0595605	-0.39139	-0.629916	0.105077
YIL047C	SYG1	-0.0148314	0.0753111	0.0187001	-0.40741	-0.0833487	-0.331759
YIL048W	NEO1	-2.89315	-0.369498	-1.78773	-3.41819	-0.363243	-2.69433
YIL050W	PCL7	0.631024	0.283535	-0.517399	0.641857	0.067157	-1.36607
YIL051C	MMF1	-0.157248	-0.0727875	0.144076	-0.162689	-0.0783688	-0.0259507
YIL052C	RPL34B	-0.135207	-3.7829	0.00219421	0.284542	-4.84986	-0.00513
YIL053W	RHR2	0.342064	-0.281142	0.449904	3.93866	1.9174	3.61116	yes
YIL054W	#REF!	-0.88083	-10.6398	0.135534	-1.2103	-6.41128	-0.264014
YIL055C	#REF!	-0.00907208	1.75628	0.965235	-0.513224	1.85473	0.2665
YIL056W	VHR1	-0.574056	-0.0890461	-0.0783162	-0.909761	-0.0724154	-0.138729
YIL057C	RGI2	-0.465411	-0.0538382	-0.0678882	-2.28331	0.0150463	0.283527
YIL059C	#REF!	0.236938	-0.918694	-1.02564	-0.370303	-1.01515	-1.40122
YIL061C	SNP1	-0.417397	0.572579	0.131302	-0.454721	0.822566	0.408038	yes
YIL062C	ARC15	0.542946	-0.868303	-0.570915	0.409629	-0.672808	-0.030947
YIL063C	YRB2	0.157297	-0.525435	-0.00219756	0.354002	-0.40576	0.32351	yes
YIL064W	SEE1	-0.103519	-0.150243	0.3483	-0.714311	-0.449576	0.604537
YIL065C	FIS1	0.220691	-1.64544	-0.954608	0.364219	-1.47268	-0.670742
YIL066C	RNR3	0.203433	-0.0492058	-0.480166	-0.904699	-0.575576	-0.864502
YIL068C	SEC6	0.650629	0.137664	0.148045	-0.02966	-0.113733	-0.242236
YIL069C	RPS24B	-0.623064	-0.138951	-0.446433	-1.24187	-0.10851	-0.391552
YIL070C	MAM33	0.819206	0.901304	-0.0449236	-0.0819066	1.00892	-0.142779
YIL071C	PCI8	0.339501	0.074661	0.273972	0.00975268	-1.0449	-0.22799
YIL074C	SER33	-0.234661	0.734703	0.104359	-0.266007	0.398225	0.127673
YIL075C	RPN2	-0.243019	0.278657	-0.484461	1.35126	1.67078	0.680862	yes
YIL076W	SEC28	0.555955	-0.177291	0.18273	0.0333509	-0.0655007	0.0158339
YIL077C	#REF!	-0.0667289	-0.834049	-0.00565763	-0.366818	-0.619751	-0.397993
YIL078W	THS1	-0.0109893	-0.458641	-0.342543	-0.0776277	-0.310905	-0.216282
YIL079C	AIR1	-2.47812	0.397068	-0.869615	-1.68267	0.393931	-0.404462	yes
YIL083C	CAB2	0.494365	0.280833	0.544132	0.129603	-0.372243	0.543882
YIL084C	SDS3	-0.114005	0.327905	-1.04143	-0.00560271	0.668588	-1.58078
YIL085C	KTR7	0.998571	0.31876	0.242021	0.850095	0.531239	0.307651
YIL088C	AVT7	0.0665113	-1.10218	-0.898679	-0.268076	-1.25932	-0.891955
YIL089W	#REF!	0.955041	0.430328	0.17191	0.755737	-0.0763816	0.362978
YIL090W	ICE2	0.457502	-0.462187	0.55613	0.385378	-2.71388	-0.394239
YIL091C	UTP25	0.303423	-0.148289	0.0865067	0.624491	-0.0569559	-0.0888019	yes
YIL092W	#REF!	-1.48876	0.662275	0.47314	-2.41099	0.598709	0.170741
YIL093C	RSM25	-0.00238186	0.220518	0.288223	-1.03691	0.504272	-0.0857799
YIL094C	LYS12	0.154917	0	0.127287	-0.224958	-0.413487	0.333889
YIL095W	PRK1	0.100646	-0.761742	-1.79424	-0.205621	-0.921205	-2.20777
YIL096C	#REF!	-0.0604784	0.204923	-0.649632	-0.00560271	0.667123	-1.2269
YIL097W	FYV10	0.449108	0.727954	-0.253317	0.25673	0.788618	-0.00980952
YIL098C	FMC1	0.533112	1.11426	-0.0170399	-0.568191	0.98628	-0.210602
YIL101C	XBP1	-0.874764	0.452207	-9.68168	-2.49553	0.25233	-8.59759
YIL103W	DPH1	0.855052	0.26626	-0.544687	1.16744	0.809348	-0.234547
YIL104C	SHQ1	-0.344873	-0.267268	0.0773783	-0.0253853	-0.0140296	-0.859495
YIL105C	SLM1	-0.39816	-1.66825	0.527689	-0.452867	-1.98129	0.454301
YIL106W	MOB1	-1.54044	0.164338	-0.440035	-2.40383	-0.0122944	-0.63607
YIL107C	PFK26	0.114781	0.290205	-0.190898	0.0826121	0.233382	-0.526167
YIL108W	#REF!	1.04913	-10.6398	0.498009	0.594379	-10.5812	0.696478
YIL111W	COX5B	0.570772	-0.287749	-0.405969	-0.0217564	-0.654905	-1.30428
YIL112W	HOS4	-0.845877	-0.267268	0.265959	-1.69834	-0.172837	0.00511183
YIL113W	SDP1	0.0123233	-0.328991	0.435965	-0.147041	-0.740849	0.280464
YIL115C	NUP159	-0.530779	0.369336	0.328501	-0.370303	0.34287	-0.0122993
YIL118W	RHO3	0.572533	-0.530515	-10.6817	0.147382	-0.890262	-9.01262
YIL119C	RPI1	0.0140752	-0.166955	0.383065	0.197007	-0.025826	0.243191
YIL122W	POG1	-0.0151069	-0.340098	-0.300135	0.14612	-1.1062	0.167285
YIL123W	SIM1	-0.0959363	-0.0241633	0.925157	-0.42361	-0.128959	0.757878
YIL124W	AYR1	0.0610435	-0.123108	0.276616	-0.568191	-0.332087	0.205144
YIL125W	KGD1	0.656009	1.55865	-0.255712	0.0620752	1.53514	-0.289234
YIL126W	STH1	0.0728578	0.197835	-0.464499	1.87386	0.69841	1.08501	yes
YIL127C	RRT14	-0.125747	-0.509222	-0.290971	-0.57823	-0.402536	-0.891511
YIL128W	MET18	-0.150825	0.0603726	0.0798736	0.173648	-0.551611	0.0976413
YIL129C	TAO3	0.250606	0.162723	-1.57371	-0.264385	-0.25702	-2.13066
YIL130W	ASG1	0.252387	0.292386	0.112738	0.626303	0.809348	0.469847	yes
YIL131C	FKH1	-0.080903	0.428189	-0.26488	0.269544	1.2961	0.284292	yes
YIL132C	CSM2	-0.0119488	-0.0426715	-0.4684	-0.507457	0.0344291	-0.472503
YIL133C	RPL16A	0.650561	0.695039	0.195935	1.31027	0.561545	0.589853
YIL135C	VHS2	-0.444809	0.0821685	-0.0423369	-0.689299	0.288025	0.235303
YIL136W	OM45	0.640215	0.465461	0.27972	0.223356	0.677365	-0.425691
YIL137C	TMA108	0.292637	-0.255655	0.0963995	-0.17992	-0.967785	-0.20957
YIL138C	TPM2	1.0583	1.87023	0.412918	1.11163	2.12249	0.591479
YIL140W	AXL2	-0.257239	-0.186522	0.405122	-1.36856	-0.398806	-0.234898
YIL143C	SSL2	-0.498144	-0.25393	-0.322399	4.69446	3.83408	4.67377	yes
YIL144W	TID3	-0.167606	0.19803	0.698783	-0.159478	0.15014	0.902757
YIL145C	PAN6	-10.6724	-10.6777	-10.6817	-4.7633	-3.49476	-10.5976
YIL147C	SLN1	1.02548	0.999095	0.229233	0.943578	0.836652	0.0728366
YIL148W	RPL40A	-10.6724	-10.6777	-10.6817	-10.0112	-2.97234	-10.5976
YIL149C	MLP2	0.556603	0.753598	-0.969273	0.689498	0.742417	-0.990236
YIL150C	MCM10	-0.295283	0.43769	0.194291	0.385037	0.878231	0.770856	yes
[truncated: 2,267 more rows]

## Sheet: BC_DN
ORF	Name	IN1	IN2	IN3	IP1	IP2	IP3	binder
YAL001C	TFC3	-1.02836	0.0493315	-0.594878	-1.27088	0.05633	-0.245022
YAL002W	VPS8	0.972126	0.107561	0.0526691	0.697842	-0.0478708	-0.274346
YAL005C	SSA1	-0.958248	0.617005	0.658649	3.46041	4.61271	5.43498	yes
YAL007C	ERP2	0.60184	0.666269	0.217949	0.3399	0.419504	0.207267
YAL008W	FUN14	0.225585	-0.0890461	-0.165344	-0.935342	-0.550533	-0.611537
YAL009W	SPO7	NA	0.15137	0.253908	NA	-0.117676	0.00611053
YAL010C	MDM10	-0.106371	-0.745505	0.0487925	-0.937086	-1.12892	-0.322627
YAL011W	SWC3	-1.05037	0.429497	0.64025	-1.21681	0.456043	0.965609
YAL012W	CYS3	0.0610435	0.0727341	-0.0634888	2.55634	1.79845	2.13967	yes
YAL015C	NTG1	-1.03399	0.609416	-0.233561	-2.98886	0.875526	-0.902359
YAL016W	TPD3	0.0131995	0.84339	0.434666	0.0828504	1.13856	0.336841
YAL017W	PSK1	0.454279	-0.23167	-0.742098	0.580295	-0.702477	-0.379629
YAL019W	FUN30	-0.390495	0.439923	0.697159	0.797737	1.67916	1.27201
YAL021C	CCR4	-0.515078	0.982276	0.211624	-0.290128	0.990662	0.319785
YAL022C	FUN26	0.760117	0.509632	0.449536	0.454339	0.3803	0.193576
YAL023C	PMT2	-0.27902	0.196257	0.502666	-0.814119	-0.088346	0.260378
YAL024C	LTE1	0.449108	-0.108813	-0.567935	0.801752	-0.772299	-0.890228
YAL026C	DRS2	-0.197072	0.916713	0.643668	-0.165714	1.05542	0.762217
YAL027W	SAW1	-10.6724	-10.6777	-10.6817	-5.48767	-5.9542	-5.42766
YAL029C	MYO4	1.00475	-0.562977	-0.146472	0.757335	-0.473984	-0.452254
YAL031C	GIP4	0.0690416	0.191874	-0.0127927	-0.176756	-0.506287	-0.0220478
YAL032C	PRP45	-0.502183	-0.934161	-0.00565763	-0.48273	-0.568576	-0.427337
YAL033W	POP5	0.923768	0.779114	0.120031	1.23945	1.23058	0.101657
YAL034W-A	MTW1	-0.586868	-0.709056	0.57962	-1.33753	-0.505721	0.297722
YAL035W	FUN12	0.44285	0.739044	-0.27722	0.218725	0.348797	-0.370817
YAL036C	RBG1	0.126046	-0.63606	0.153583	-0.221694	-0.909802	0.244763
YAL038W	CDC19	-1.6253	-1.13083	-1.08735	3.25965	3.55677	2.55628	yes
YAL039C	CYC3	0.97842	-0.0900082	0.0982175	0.614792	-0.224749	-0.163205
YAL041W	CDC24	-0.55575	-0.237847	0.380754	-0.744634	0.0187123	0.241856
YAL043C	PTA1	0.5285	1.04496	0.64186	0.212914	0.618472	0.373415
YAL044C	GCV3	-0.458361	-0.387127	-0.328294	-1.15215	-0.362032	-0.594794
YAL044W-A	#REF!	-1.87209	-2.41579	-0.256837	-2.07336	-2.7933	-0.224844
YAL046C	AIM1	0.271261	0.464151	-0.346128	-0.196313	0.484216	0.119804
YAL047C	SPC72	0.30557	-1.77384	-0.553683	0.123199	-2.88381	-0.827749
YAL049C	AIM2	-1.02857	0.194186	0.620961	-2.60184	0.144888	0.470519
YAL051W	OAF1	-0.413293	-0.166087	0.0964582	-0.912299	-0.118698	0.106215
YAL053W	FLC2	0.853585	-0.254604	0.170852	1.13534	-0.027011	-0.124896
YAL054C	ACS1	-0.17657	0.486559	0.466799	-0.464333	0.684602	0.578586	yes
YAL055W	PEX22	0.333901	1.01751	0.420298	0.116767	1.2097	0.45566
YAL056W	GPB2	1.00949	0.928638	0.104359	0.601512	0.780195	-0.777958
YAL058W	CNE1	-0.243019	0.0356669	-0.206958	-0.718906	-0.856164	-0.907589
YAL059W	ECM1	-0.324787	-0.722421	-0.337778	0.90806	0.0814678	1.15268	yes
YAL060W	BDH1	-0.710976	-0.187872	-1.23047	-1.56414	-0.704372	-0.847718	yes
YAL061W	BDH2	NA	0.0954196	0.53628	NA	0.589609	0.659211	yes
YAR002C-A	ERP1	0.488076	0.0339473	-0.430195	0.299386	0.320997	-1.01262
YAR002W	NUP60	-0.447218	-0.0123837	-0.423112	-0.735103	0.264972	-0.849394
YAR003W	SWD1	0.124425	0.568427	-0.0414327	0.492598	0.806025	-0.542305
YAR007C	RFA1	0.158083	-1.63698	0.00750916	2.68489	-0.339217	2.11868	yes
YAR009C	#N/A	-1.1082	0.728714	-0.117596	-0.598522	0.683828	0.0716718
YAR014C	BUD14	-0.715323	-0.334534	-0.822143	-0.0353793	-2.06181	-0.934029
YAR015W	ADE1	-0.352753	0.353637	0.102957	0.275331	0.898177	0.673292	yes
YAR019C	CDC15	0.26274	-0.0284635	-0.212036	-0.145494	-0.00582908	-0.171322
YAR027W	UIP3	0.760289	0.346049	0.0876289	0.300993	-0.18781	0
YAR028W	#REF!	0.462328	0.559266	0.496676	0.0710961	0.1845	0.395929
YAR031W	PRM9	-0.536291	-1.12607	0.410088	-0.59648	-1.54503	0.0517237
YAR044W	#N/A	0.730587	0.174029	-0.0261469	0.602562	-0.28744	-0.0987378
YAR062W	#REF!	-2.68374	-0.502794	0.0889862	-5.42626	-1.34243	0.0525672
YAR064W	#REF!	-0.31528	0.259564	-0.156926	-0.646304	-0.0655007	-0.386741
YAR071W	PHO11	-0.16265	-0.462187	-0.321928	-1.27991	-1.85406	-0.171322
YBL001C	ECM15	0.21742	-0.429122	0.57962	1.08197	-0.102431	0.720461
YBL002W_1	HTB2_1	-3.56572	-5.12035	-6.65773	3.95272	1.89157	1.05836
YBL002W_2	HTB2_2	-3.19518	-4.77632	-6.48231	4.7414	2.57674	1.26756
YBL002W_3	HTB2_3	-3.58185	-4.83999	-6.17696	3.91324	1.97491	0.611311
YBL003C_1	HTA2_1	-3.4848	-5.2182	-6.44875	2.61507	0.385287	0.00140275
YBL003C_2	HTA2_2	-3.1591	-4.63707	-6.21073	3.78544	1.72209	0.486936
YBL003C_3	HTA2_3	-3.24491	-4.57192	-6.26625	3.9928	1.66819	0.558478
YBL005W	PDR3	-0.0855856	-0.644297	-0.460091	-0.251339	-0.72923	-1.49692
YBL007C	SLA1	-0.181574	0.522566	0.263034	0.0762356	0.512594	0.0381311
YBL008W	HIR1	-0.376656	0.739605	0.252013	-0.0168738	1.21222	0.240041
YBL010C	#REF!	-0.582313	0.537207	0.0152899	-2.48767	0.215729	-0.0652311
YBL011W	SCT1	0.0529409	-0.222392	-3.23873	-0.00700679	-0.725378	-2.4683
YBL013W	FMT1	-2.19489	0.125908	0.120896	-1.97458	-0.103442	0.166383
YBL014C	RRN6	0.917734	0.934801	0.072494	0.963093	0.778	0.0634912
YBL015W	ACH1	0.584373	0.909589	0.577477	-0.133176	1.24204	0.474546
YBL016W	FUS3	-2.33703	-0.666492	NA	-1.28671	-0.582637	NA
YBL017C	PEP1	0.588607	0.610506	-0.347325	0.216403	0.612325	-0.245022
YBL018C	POP8	0.615864	-0.924503	-0.305552	1.14801	0.0912903	-0.0286809
YBL019W	APN2	0.187639	-0.349774	-0.231203	0.055597	-0.790038	-0.402842
YBL021C	HAP3	0.34299	0.179484	0.0782105	0.515272	-0.15978	0.0836514
YBL022C	PIM1	0.831562	0.520709	0.136391	0.560006	0.41386	0.226236
YBL023C	MCM2	-0.88083	-0.60637	-0.746092	0.674356	1.14927	1.25526	yes
YBL024W	NCL1	0.283827	0.0219852	-0.0703893	3.60251	2.25288	2.9411	yes
YBL025W	RRN10	-0.0348948	0.0183785	0.711713	0.0682575	0.369534	0.48323
YBL026W	LSM2	-1.58496	-1.46583	-0.847207	-1.56414	-1.11625	-0.955535
YBL027W	RPL19B	-5.75822	-0.558975	-1.35332	-5.01765	-0.458373	-1.45393
YBL028C	#REF!	-2.27096	-1.46987	-0.14335	0.2222	0.100038	2.3563	yes
YBL029C-A	#REF!	0.497143	0.481093	0.183559	-0.0648667	0.522087	0.439025
YBL029W	#REF!	0.00969142	-0.089005	-0.242886	-0.165737	-0.575685	-0.485148
YBL031W	SHE1	0.318592	0.762686	-0.24452	-0.315532	0.454973	-0.361346
YBL032W	HEK2	-0.88434	-1.24105	-1.02755	-1.12836	-0.90172	-0.811955
YBL033C	RIB1	0.32546	0.870139	0.32605	0.121915	1.15485	1.03904
YBL034C	STU1	-0.0595568	0.264062	-0.0532321	0.12063	0.296576	0.337578
YBL035C	POL12	NA	-0.912848	0.184056	NA	-1.34539	0.877133	yes
YBL036C	#REF!	-0.114005	0.15912	0.174748	0.0041878	0.142782	0.0845297
YBL037W	APL3	-0.571225	-1.31336	-0.842361	-0.724424	-1.31676	-1.21344
YBL038W	MRPL16	0.107731	0.0778835	-0.272666	-0.48273	-0.231366	-0.578242
YBL039C	URA7	0.371286	-0.300509	0.279048	1.89867	0.704015	1.04401	yes
YBL040C	ERD2	-0.140362	-0.297718	0.226822	-0.524828	-0.213786	-0.0676975
YBL042C	FUI1	0.548558	0.13526	0.235694	0.558628	-0.632268	0.101118
YBL045C	COR1	0.51923	0.205697	-0.367823	-0.214989	-0.329718	-0.0651327
YBL046W	PSY4	0.342293	0.664911	0.400471	1.04879	1.1559	0.881183
YBL047C	EDE1	0.923768	0.453625	0.584021	0.666725	0.452911	0.102798
YBL051C	PIN4	-1.36591	-0.168118	-0.246752	-0.700102	-0.329718	-0.280283
YBL052C	SAS3	0.182443	0.062061	0.369531	-0.23315	0.0242282	0.446807
YBL054W	TOD6	0.0361927	-0.163047	0.076962	-0.164201	-0.279704	-0.517375
YBL055C	#REF!	0.315549	-0.133721	0.294886	0.110306	-0.0715533	0.300258
YBL056W	PTC3	0.0114465	0.26186	0.47314	1.03794	1.13486	1.12948	yes
YBL057C	PTH2	-0.0115381	0.26186	0.499475	-0.447078	-0.0128552	0.588527
YBL058W	SHP1	-0.0244815	-0.652529	-0.054665	0.997298	0.638573	0.675927	yes
YBL059C-A	CMC2	-0.859946	-2.54704	-0.389849	-1.47708	-2.65639	-0.602211
YBL059W	#REF!	0.880244	0.270648	0.0161587	1.21939	0.159546	-0.0997352
YBL060W	YEL1	0.0435366	0.0970674	0.464254	-0.0541252	0.272698	-0.222548
YBL061C	SKT5	0.0380482	0.144842	0.293607	0.117863	0.150118	0.574309
YBL063W	KIP1	-0.150893	-0.0520154	0.0463036	-0.13575	-0.481853	0.155428
YBL064C	PRX1	0.779301	0.434068	0.32885	0.854506	0.96228	-0.202053
YBL067C	UBP13	-0.418578	-0.115477	0.29202	-0.614622	-0.486591	-0.0362991
YBL068W	PRS4	-0.351259	-0.203081	-0.321222	-1.82843	-0.380302	-0.425691
YBL071W-A	KTI11	0.140054	-0.526051	-0.137127	0.671817	-0.274	-0.0600168
YBL072C	RPS8A	0.402369	0.6995	-0.259087	-0.363341	0.554509	-0.355066
YBL074C	AAR2	0.274481	-0.633326	0.0265441	0.375713	-1.37526	0.349319
YBL075C	SSA3	-0.216071	0.267724	0.0823646	-1.01405	0.305076	0.00881817
YBL076C	ILS1	-0.209923	-0.41445	0.391794	0.0426986	0.0547925	0.660979
YBL078C	ATG8	0.0463688	0.636332	0.100853	-0.187065	0.652419	0.438121
YBL079W	NUP170	-0.123671	-0.676897	-0.514708	0.0214332	-1.26379	-0.505156
YBL080C	PET112	0.238967	0.0704732	1.00176	-0.044001	-0.407302	0.514852
YBL082C	ALG3	0.149349	-0.196929	-0.537019	-0.181505	-0.330681	-0.799926
YBL084C	CDC27	0.601213	0.371434	0.511276	-0.0536175	0.127021	0.325353
YBL085W	BOI1	-10.5656	0.648496	0.104359	-10.062	0.552584	0.241856
YBL086C	#REF!	0.0924462	0.0595277	0.00569803	-0.278212	0.146992	-0.152572
YBL090W	MRP21	0.0052263	-1.03246	0.0251883	0.0736631	-1.16335	0.142172
YBL091C	MAP2	-0.243019	-0.229603	NA	-0.403897	-0.399607	NA
YBL091C-A	SCS22	0.563589	0.444461	0.132104	0.84442	0.835663	0.402413
YBL093C	ROX3	-0.0577155	0.397091	-0.030626	0.57655	1.16889	0.635433
YBL095W	#REF!	-0.468863	-0.523449	0.221989	-1.28397	-0.458373	0.293731
YBL097W	BRN1	0.454707	NA	-0.212545	1.21175	NA	0.124306
YBL098W	BNA4	0.289024	-0.26515	-0.0369201	0.101212	-0.572221	0.00325507
YBL099W	ATP1	0.517399	0.383652	0.554337	-0.0555773	0.0648384	0.204929
YBL101C	ECM21	-0.379464	0.287244	0.332243	-0.346084	0.156047	0.00732954
YBL102W	SFT2	0.0824622	0.325798	-0.516771	-0.10584	0.125822	-0.73495
YBL103C	RTG3	0.241212	-1.3114	0.531427	0.156191	-1.56877	0.231343
YBL104C	SEA4	-1.99952	0.381187	0.12608	-1.79526	0.102671	-0.0549189
YBL107C	MIC23	-0.523919	0.135817	-0.21582	-0.528716	-0.2604	-0.49304
YBL111C	#REF!	0.0518893	-0.495135	-0.181263	-1.05642	-0.944576	-0.448907
YBR001C	NTH2	0.0212617	-0.0501417	0.144928	-0.00270168	0.0435949	0.0844339
YBR002C	RER2	-0.0949193	0.990929	0.599631	-0.134268	0.969065	0.198756
YBR003W	COQ1	-1.48343	-0.52215	0.221989	-1.7001	-0.508398	-0.383542
YBR006W	UGA2	0.753529	1.40869	0.415743	-0.131309	1.3719	0.316529
YBR007C	DSF2	0.235322	-0.429122	0.23644	-0.544377	-1.19966	-0.39316
YBR009C_1	HHF1_1	-3.71131	-4.98744	-7.37801	5.5398	3.38631	2.23633
YBR009C_2	HHF1_2	-3.52378	-5.34819	-6.72823	5.80976	3.55964	2.2685
YBR009C_3	HHF1_3	-3.57465	-4.86721	-6.63473	5.53093	3.39706	2.10223
YBR010W_1	HHT1_1	-3.67093	-5.60254	-7.38598	5.42657	3.17704	1.99527
YBR010W_2	HHT1_2	-3.97298	-5.30767	-6.99852	5.72827	3.50699	2.08626
YBR010W_3	HHT1_3	-4.14009	-6.13656	-6.82455	5.16245	2.94095	1.65795
YBR011C	IPP1	-0.726374	-0.573704	-0.397267	2.34496	1.1162	2.34622	yes
YBR015C	MNN2	0.131706	-10.6777	0.422921	-0.768053	-10.2761	0.471863
YBR016W	#REF!	0.128475	-0.19189	0.386429	-0.737432	-1.2427	0.465808
YBR017C	KAP104	0.307714	0.722092	-0.0559688	0.555778	0.672243	-0.301818
YBR022W	POA1	0.709964	-0.778706	-0.687324	0.51727	-1.12382	-0.141428
YBR023C	CHS3	-1.97199	-0.00352737	-0.0252528	-4.3388	-0.575685	-0.0593981
YBR024W	SCO2	0.694753	0.147293	-0.0703893	0.364219	-0.00377175	-0.249383
YBR025C	OLA1	-0.428587	0.160298	-0.1496	-1.14021	0.203434	-0.20777
YBR026C	ETR1	0.509232	-1.32918	0.12608	0.23487	-1.51511	0.0410502
YBR028C	YPK3	1.19909	0.562475	0.389785	1.25965	0.663455	0.24947
YBR030W	RKM3	-0.483429	0.213517	0.18107	-0.330727	0.564095	0.412586
YBR034C	HMT1	-0.970253	0.341871	-0.00925231	-0.955945	1.02937	-0.0545552
YBR036C	CSG2	0.870092	0.527625	0.0140478	0.896507	0.535143	-0.113336
YBR037C	SCO1	0.927276	1.06972	-0.0189457	0.287788	1.01172	-0.45058
YBR039W	ATP3	-0.596911	-0.516965	-0.790979	-0.365079	-0.128959	-1.23634
YBR041W	FAT1	-10.6724	-10.6777	-10.6817	-10.0112	-5.81669	-5.17132
YBR042C	CST26	0.447813	0.117508	0.24906	-0.295265	-0.404219	0.123512
YBR043C	QDR3	-0.0403389	0.371448	0.0555697	-2.79206	0.0230836	-0.275659
YBR047W	FMP23	0.265684	-0.415625	-0.00131813	-0.913195	-1.15459	-0.252182
YBR048W	RPS11B	-3.3778	-2.05933	-1.08549	-4.25634	-1.33655	-0.87478
YBR049C	REB1	0.0673553	0.191874	-0.376756	1.20673	1.30931	0.300258	yes
YBR052C	RFS1	-0.309386	-0.0420015	0.172412	-1.05703	0.0681715	0.0827725
YBR053C	#REF!	-0.540439	-0.229342	0.15595	-1.01492	-0.618305	0.229374
YBR054W	YRO2	0.44215	-1.38476	0.0353255	0.412674	-1.92299	-0.213439
YBR055C	PRP6	-0.29413	-0.197939	-0.0405291	-0.127057	0.15014	0.13966
YBR056W	#REF!	0.090787	0.649272	-0.0697307	-0.742101	0.863427	-0.371175
YBR057C	MUM2	0.0131995	0.545679	-0.0623747	-0.296982	0.910609	0.0906633
YBR058C	UBP14	0.154917	0.139264	-0.903601	0.986658	0.3605	-1.3145
YBR059C	AKL1	0.420975	0.797439	0.4037	0.124068	0.912155	0.470302
YBR060C	ORC2	-0.451836	-0.934161	-0.681275	3.59449	2.74199	3.4362	yes
YBR061C	TRM7	0.0426767	0.359502	-0.14439	-0.308829	-0.0208677	0.0446168
YBR062C	#REF!	0.32546	0.433416	-0.581015	0.167438	0.443264	-1.19884
YBR065C	ECM2	-0.265226	0.110914	0.0444797	-0.208737	-0.221451	0.174002
YBR066C	NRG2	-0.829176	0.706167	0.157639	-0.797604	0.7396	0.170741
YBR067C	TIP1	-0.969388	-0.373006	-0.00188341	-0.869753	-0.386444	-0.375575
YBR068C	BAP2	0.208689	0.664355	0.00744675	-0.33527	0.454346	-0.275659
YBR069C	TAT1	-0.318176	NA	0.147252	-2.24968	NA	0.430319
YBR070C	ALG14	-0.759834	0.165145	-1.11862	-0.956138	0.264289	-3.1687
YBR071W	#REF!	0.0982386	-0.808897	0.206304	0.074909	-1.59664	-0.0420393
YBR072W	HSP26	0.229196	-0.889817	0.178633	-0.228229	-1.28177	0.101985
YBR073W	RDH54	-0.559954	0.0405666	0.333737	0.384003	0.451534	0.789398	yes
YBR077C	SLM4	0.48359	0.0193111	0.635816	0.476143	-0.128959	0.258332
YBR079C	RPG1	-9.67243	-10.6777	-10.6817	-6.8413	-10.2761	-5.13816
YBR080C	SEC18	0.489026	0.260319	-0.0113375	0.425794	0.458404	0.122057
YBR081C	SPT7	0.113027	0.633461	0.481343	0.307316	1.00116	0.30177
YBR082C	UBC4	-2.04988	-0.303286	-1.47362	-0.785922	0.287622	-0.653302
YBR083W	TEC1	-0.0817624	-0.906778	0.170239	-0.509377	-0.944576	0.472951
YBR084C-A	RPL19A	-0.0512892	-0.0168324	-0.188823	-0.601836	-0.0752258	-0.229081
YBR084W	MIS1	0.832631	0.216633	0.209021	0.871645	0.473404	0.749161
YBR085W	AAC3	-0.190626	-0.0230836	0.181734	-0.0893863	-0.345387	-0.112764
YBR086C	IST2	0.513689	-0.0320612	-0.242886	0.0041878	0.575625	-0.489063
YBR087W	RFC5	0.0443941	0.38837	0.451465	0.65322	1.08856	0.943994
YBR089C-A	NHP6B	-0.0818383	0.0912917	0.0889862	3.31267	2.72546	3.12405	yes
YBR092C	PHO3	0.538246	0.23517	0.152003	-0.0168738	-1.25932	-0.0449179
YBR093C	PHO5	0.418349	-0.453718	0.26157	0.34192	-0.300276	-0.0927681
YBR094W	PBY1	0.460945	-0.110362	0.416448	0.26775	-0.724775	0.265482
YBR095C	RXT2	0.285402	0.476466	-0.066048	1.26664	1.04918	0.261948
YBR096W	#REF!	0.480864	0.276833	0.323997	0.489662	0.0517946	-0.0409919
YBR097W	VPS15	-0.128867	-0.118192	0.183559	-0.475206	-0.00755339	0.592292
YBR100W	#N/A	0.392991	0.0805036	0.00832032	0.105117	-0.396541	0.135428
YBR101C	FES1	0.746738	0.832898	-0.197358	1.31787	0.983425	-0.674647
YBR103W	SIF2	-0.116429	-0.504084	-0.0733568	0.322738	-0.528633	0.269551
YBR104W	YMC2	-0.49376	0.0390998	-0.174874	-0.638362	0.33213	-0.153607
YBR105C	VID24	-1.82694	-0.106915	0.284107	-2.9132	0.27366	0.59162
YBR106W	PHO88	-0.106147	-6.05483	-10.5821	0.207081	-6.99624	-5.9542
YBR107C	IML3	0.526633	0.504675	0.0947554	0.261403	0.0196445	-0.223634
YBR110W	ALG1	0.846719	0.330008	-0.570542	0.806556	-0.462343	-0.507475
YBR111C	YSA1	0.667981	-0.147313	-0.425469	1.06559	0.257205	-0.50483
YBR112C	CYC8	-1.45184	-0.704628	-0.437484	0.515383	0.293012	0.916817	yes
YBR114W	RAD16	0.0389751	-0.662513	-0.314185	0.295506	-0.975721	-0.388343
YBR115C	LYS2	0.095759	-0.232705	0.00657265	1.00767	0.838269	0.429628
YBR117C	TKL2	0.24196	-0.547149	1.24832	-0.328233	-1.29313	1.12565
YBR118W	TEF2	0.0052943	0.279382	-0.42429	0.285689	0.134327	-0.346105
YBR119W	MUD1	-0.639282	-0.71498	-0.755593	0.00134894	-0.13102	0.441732	yes
YBR120C	CBP6	-10.6724	-10.6777	-10.6817	-5.5518	-4.9542	-6.79023
YBR121C	GRS1	0.296241	1.09666	0.206304	1.46653	1.60193	0.780166
YBR122C	MRPL36	0.36368	0.0317482	0.1819	0.371539	-0.455787	0.349584
YBR123C	TFC1	-0.056793	-0.170151	0.338211	0.436803	0.0454211	0.707769
YBR125C	PTC4	0.754364	0.451563	0.398474	0.756957	0.391874	0.250253
YBR126C	TPS1	0.456213	-0.161035	0.308426	0.744495	-0.278945	0.300258
YBR127C	VMA2	-0.721657	-0.32691	-0.708698	-1.85747	-0.751478	-1.078
YBR129C	OPY1	-0.120717	0.272836	0.298462	-0.238088	-0.111217	0.285056
YBR130C	SHE3	0.269356	-0.724978	-0.116576	-0.0268088	-0.796344	-0.112764
YBR131W	CCZ1	0.653442	0.325095	0.414379	0.801752	0.208698	0.296473
YBR133C	HSL7	1.29822	-0.337154	0.632784	1.14619	-0.50305	0.665155
YBR135W	CKS1	-0.223277	0.0830003	-0.417235	0.443072	0.412126	0.156465
YBR137W	#REF!	-0.412682	-0.916168	-0.193838	-0.296982	-0.87952	-0.170274
YBR138C	#REF!	0.550766	-0.82441	-0.0160879	0.393281	-0.627004	-0.954196
YBR139W	#REF!	0.456213	0.0433795	0.439856	0.930554	-1.007	0.684343
YBR141C	BMT2	-1.03225	-0.39781	0.230035	-0.892121	-0.720114	-0.265486
YBR142W	MAK5	-1.68906	0.155435	0.15595	-1.78592	0.301442	0.298718
YBR143C	SUP45	0.0443941	0.588481	-0.0477742	-0.279908	0.313527	-0.253291
YBR145W	ADH5	0.286852	NA	-0.0761981	0.233137	NA	0.116658
YBR149W	ARA1	-0.886156	-0.280045	0.114362	-1.79206	-0.0715533	0.124367
YBR150C	TBS1	0.454707	0.313676	-0.494679	0.300993	0.451534	-0.807661
YBR151W	APD1	-0.369591	0.0175256	0.643065	-0.143183	0.264289	0.628391
YBR152W	SPP381	0.081627	-0.781387	-0.473443	1.19396	-1.31902	-0.0107473	yes
YBR155W	CNS1	0.180096	0.490134	0.106982	0	0.359847	-0.377165
YBR156C	SLI15	-0.302828	-6.59026	0.547141	-0.669153	-10.2761	0.515504
YBR158W	AMN1	0.680569	-0.12114	-0.602002	0.409629	-0.324992	-1.42076
YBR159W	IFA38	0.307714	0.246351	0.0342843	-0.772823	-0.0813676	0.0579437
YBR160W	CDC28	-2.08371	-0.136623	-2.67605	-2.34589	0.66272	-2.67872
YBR161W	CSH1	0.583534	NA	0.037161	0.0147695	NA	-0.132003
YBR162C	TOS1	-1.71823	0.380272	0.212382	-3.7633	0.603459	0.2526
YBR162W-A	YSY6	0.405725	-0.154158	0.150421	-0.0614005	-0.625073	-0.186076
YBR163W	EXO5	0.78315	0.0580435	0.134677	0.82365	-0.109525	-0.0409919
YBR164C	ARL1	0.55037	0.5832	0.251275	-0.0353793	0.257205	-0.108743
YBR166C	TYR1	0.0724085	0.193416	-0.0190093	0.309573	0.222725	0.0299468
YBR167C	POP7	-0.252465	0.154379	-0.246007	-0.551796	1.44626	-0.380841
YBR168W	PEX32	-0.273257	-1.37301	-0.0179925	-0.261146	-0.966491	-0.336391
YBR169C	SSE2	-0.41076	-0.48371	0.0689097	-0.676184	-0.240238	0.0564422
YBR170C	NPL4	-0.0908582	0.25275	-0.547343	0.251971	0.350276	-0.126645
YBR171W	SEC66	1.29279	0.456263	0.21714	0.876063	0.459774	-0.181144
YBR172C	SMY2	0.115477	0.305274	0.0980417	0.0508189	0.0814276	0.0272084
YBR173C	UMP1	-2.62258	-1.25776	-3.7044	-2.24304	-1.07645	-3.21388
YBR175W	SWD3	-0.248259	0.564264	0.16538	-0.195844	0.878694	-0.23674	yes
YBR176W	ECM31	0.378104	-0.260922	-0.828368	0.115477	-0.898914	-0.569681
YBR177C	EHT1	0.00617451	-0.152958	-0.349721	-0.161179	0.0653581	0.00611053
YBR179C	FZO1	-0.324787	-0.71944	0.21714	-1.0762	-0.975721	0.237707
YBR181C	RPS6B	-1.59028	-0.960043	-1.74504	-2.17834	-1.69492	-2.05456
YBR185C	MBA1	0.534589	-0.36257	-0.0568822	0.340816	-0.481709	-0.26555
YBR187W	GDT1	-0.532874	-0.253553	0.132104	-0.458558	-0.589624	-0.029631
YBR188C	NTC20	-1.51301	-0.556314	NA	-1.46959	-0.491088	NA
YBR189W	RPS9B	-0.75804	-1.9464	-2.34629	-1.24968	-2.39961	-2.62604
YBR193C	MED8	-1.26637	-0.995937	-1.16429	-1.5113	-0.625551	-1.25668
YBR194W	AIM4	-0.00886724	0.062061	0.511232	-0.229868	0.567012	0.728281
YBR195C	MSI1	-0.914202	-0.520373	-0.10803	-0.983321	-1.31612	0.068637
YBR196C	PGI1	-2.12939	-4.9498	-1.38936	-1.98886	-3.18866	-1.69371
YBR197C	#REF!	-0.607683	0.417677	-0.0985949	-0.851356	0.355053	-1.06426
YBR198C	TAF5	-0.767038	0.244865	-0.144459	-1.04544	-0.531291	0.240041	yes
YBR199W	KTR4	0.530311	0.391059	0.307717	0.0802081	0.645717	0.0444647
YBR200W	BEM1	-1.28018	0.0361641	-0.146472	-1.66117	-0.0410725	-0.487878
YBR201W	DER1	0.751269	0.197835	0.230035	0.20474	0.191114	0.0716718
YBR202W	MCM7	0.0724085	0.678732	0.213898	-0.0570309	0.925999	-0.223634
YBR205W	KTR3	-1.30819	0.826793	0.274284	-2.52289	0.634332	0.0182545
YBR207W	FTH1	0.142157	-0.0347654	0.393133	-0.345891	-1.11878	-0.00606469
YBR208C	DUR1,2	0.403054	0.119942	-0.591565	-0.0849313	0.162667	-0.536891
YBR211C	AME1	-0.160673	-0.0722401	0.0690293	-0.400202	0.163706	0.0721838
YBR212W	NGR1	-1.87153	0.178706	0.0538784	-3.92376	0.665657	0.616732	yes
YBR214W	SDS24	-0.479442	-1.00862	-0.0822961	-0.943105	-1.08135	-0.0664145
YBR215W	HPC2	-0.322404	-0.594033	0.268045	0.375706	-0.479225	0.19341	yes
YBR216C	YBP1	0.27375	0.121562	0.166163	-0.0555773	0.0880102	-0.323791
YBR218C	PYC2	-0.297386	0.05699	0.524116	0.0125271	0.716106	1.31867
YBR221C	PDB1	0.323165	-0.208295	0.221182	-0.020387	0.00845056	0.188045
YBR222C	PCS60	0.587906	-1.04836	-0.240808	0.652331	-0.650416	0.126074
YBR223C	TDP1	-0.440165	0.804704	0.21552	-1.13723	0.538389	0.385654
YBR225W	#REF!	0.0537248	0.427641	-0.12271	0.126543	0.200979	-0.229144
YBR227C	MCX1	0.467126	-5.77083	-0.0623747	0.973191	-4.75256	0.184592
YBR229C	ROT2	-0.699845	-0.330317	0.0149794	-1.11368	-0.648986	0.439025
YBR230C	OM14	0.5436	0.914796	-0.0753385	0.0594874	0.739036	-1.33176
YBR231C	SWC5	0.529698	-0.172901	-0.119435	1.24616	0.387434	-0.00699999
YBR233W	PBP2	-0.378954	-0.724978	0.24906	-0.642721	-1.55161	0.285056
YBR233W-A	DAD3	0.235322	0.692803	-0.043953	-0.131309	0.472725	-0.0321988
YBR234C	ARC40	-0.188368	0.43234	-0.376349	-0.227575	0.367897	-1.03722
YBR235W	VHC1	-0.194891	-0.354391	0.0553886	-0.639981	-0.403781	-0.0460407
YBR237W	PRP5	0.0156224	0.245903	0.158482	-0.365079	0.200979	0.192339
YBR238C	#REF!	-0.351259	-1.29994	-0.210365	-0.872222	-1.27742	-0.0409919
YBR239C	ERT1	-10.5656	-10.6398	-3.99718	-7.06205	-10.5812	-5.44724
YBR241C	#REF!	-0.192713	0.0432017	0.102607	-0.389621	0.00563921	-0.049839
YBR242W	#REF!	-0.603647	0.634029	-1.16401	-1.52741	0.542458	-1.22038
YBR244W	GPX2	-0.444045	-1.06425	-0.251225	-1.09915	-1.25477	-0.761255
YBR245C	ISW1	-10.5656	-10.6398	-10.5821	-10.062	-10.5812	-10.2021	yes
YBR246W	RRT2	0.783929	0.590237	0.0623152	0.783189	0.722466	-0.186076
YBR247C	ENP1	-0.434021	0.166201	-4.39628	-0.351231	-0.0329504	-4.05843
YBR248C	HIS7	0.436752	-0.260922	-0.560144	0.832694	0.00116299	-1.13611
YBR249C	ARO4	-0.259855	0.456065	-0.348522	0.783189	1.88091	0.853624	yes
YBR251W	MRPS5	0.810547	0.540738	-1.70256	0.830497	0.701309	-2.58741
YBR252W	DUT1	0.0520885	0.164631	-0.125172	0.658544	-0.267696	0.507667
YBR253W	SRB6	-0.0494584	-0.19189	0.273972	0.12063	0.0356239	0.981257
YBR254C	TRS20	0.68472	1.01216	-0.187679	0.350524	0.908647	-0.615284
YBR255W	MTC4	0.0926333	1.1176	0.57836	0.486776	1.26311	0.162011
YBR256C	RIB5	-0.57045	0.155961	-0.660698	-0.732778	1.00058	-0.519436
YBR258C	SHG1	-0.837658	-0.232525	0.577729	0.0940369	-0.397565	0.714502	yes
YBR259W	#REF!	0.22315	-0.325676	0.132905	0.1612	-1.4464	0.18623
YBR260C	RGD1	0.633636	0.105279	-0.443273	0.734447	-0.323383	-0.631803
YBR261C	TAE1	0.564785	-0.691878	0.166163	0.522102	-0.526255	0.140505
YBR262C	AIM5	-0.0567957	0.0131514	-0.930134	-0.0804899	-0.214078	-0.957342
YBR263W	SHM1	0.777755	0.313093	-0.341828	0.699579	0.716814	-0.288111
YBR264C	YPT10	0.837434	-0.248549	0.306601	1.12654	-0.67431	0.584963
YBR265W	TSC10	0.778786	0.964332	-0.165978	0.862217	1.41213	-0.624607
YBR266C	SLM6	-0.429869	-0.384764	-0.39479	-0.221268	-0.312074	-0.188103
YBR267W	REI1	-0.536291	-0.712015	-0.789352	-0.982561	-1.30508	-1.1909
YBR268W	MRPL37	-0.121679	-0.118343	-0.275473	-0.136246	-0.470381	-0.495611
YBR271W	EFM2	0.270822	0.294542	0.643628	0.139789	0.783896	0.469175
YBR272C	HSM3	-0.549597	0.113443	0.486994	-1.08641	0.299415	0.493848
YBR273C	UBX7	-0.753562	0.285899	0.718668	-1.96138	-0.379792	0.753352
YBR274W	CHK1	-0.829176	-0.288854	-0.0803048	-1.45472	-0.70315	-0.192295
YBR275C	RIF1	-1.90024	-1.21563	-0.739792	-1.93792	-1.2958	-0.442236
YBR278W	DPB3	-2.21299	0.129635	-0.423112	-3.10434	0.482932	-0.147407	yes
YBR279W	PAF1	-0.860248	-0.590257	-0.128048	1.53615	1.5725	1.67563	yes
YBR281C	DUG2	0.221635	0.275022	-0.276536	0.259068	0.31259	-0.189257
YBR282W	MRPL27	-0.073725	1.46284	-0.168514	-0.702297	1.70044	-0.978122
YBR283C	SSH1	-0.698299	0.760019	0.526382	-1.10204	0.914155	0.492234
YBR286W	APE3	-0.00715742	0.29316	0.15426	-0.0286231	0.398939	0.463212
YBR287W	#REF!	0.400377	-0.0908799	-0.717337	0.333069	0.190462	-0.606065
YBR288C	APM3	0.65681	-0.281115	0.373605	0.668253	-0.661415	0.239252
YBR289W	SNF5	0.445867	-0.119299	0.16538	0.738642	-0.375258	0.0426579
YBR290W	BSD2	-0.569811	-0.431559	0.131245	-1.21656	-1.09135	0.172916
YBR299W	MAL32	-0.857042	-0.358048	0.337218	-0.591267	-0.415037	0.213788
YBR302C	COS2	-0.566517	-0.19895	-0.116576	-1.22332	-0.71007	-0.232358
YCL001W	RER1	0.508105	0.166986	-0.0423369	0.316325	-0.146841	0.073954
YCL005W	LDB16	0.793141	0.407089	0.152003	0.792097	-0.132741	0.244763
YCL008C	STP22	0.454013	-1.44997	0.0140478	0.23487	-1.99624	0.111893
YCL009C	ILV6	0.0537248	0.381881	-0.086287	-0.13575	0.40393	-0.404462
YCL010C	SGF29	-0.965665	0.288725	0.266481	-0.857475	0.453598	0.818856	yes
YCL011C	GBP2	-0.305011	0.148829	0.237186	0.703877	1.08143	1.20574	yes
YCL014W	BUD3	0.527839	-0.0718368	-0.114536	0.503056	-0.16969	-0.193695
YCL016C	DCC1	-0.127461	0.0645898	0.184056	-0.331747	-0.340959	0.2635
YCL017C	NFS1	-0.748595	-1.132	0.332243	-0.993268	-1.09537	-0.0284467
YCL024W	KCC4	0.545532	0.0603726	0.146459	0.254388	-0.227638	0.0207985
YCL025C	AGP1	0.926275	-2.40139	-1.48411	0.545284	-3.18888	-1.5655
YCL027C-A	#N/A	0.81109	0.20883	0.0196288	0.729931	0.26115	-0.15773
YCL028W	RNQ1	0.153328	-0.426237	0.179409	0.279943	-1.5482	0.237674
YCL029C	BIK1	0.923768	0.734703	-0.426059	0.865732	0.738472	-0.925999
YCL030C	HIS4	0.194853	0.246351	0.279048	-0.0526745	-0.050917	-0.0107473
YCL031C	RRP7	0.258312	-1.22857	-0.0559688	0.837396	-2.28744	0.376828
YCL032W	STE50	0.4157	0.85707	0.339302	0.665611	0.548039	0.283527
YCL033C	MXR2	-1.03218	-0.54201	-0.257511	-3.14086	-2.35726	-0.733401
YCL034W	LSB5	0.243454	0.34742	0.0196288	-0.226592	0.631517	0.0308585
YCL035C	GRX1	0.0724085	0.12883	-0.0198996	-0.411314	0.555974	-0.67426
YCL037C	SRO9	0.240166	0.840492	0.10173	-1.29386	1.25682	0.225189
YCL039W	GID7	-0.0898447	-0.819614	-0.408465	-0.802303	-1.06945	-1.14143
YCL040W	GLK1	-1.16661	0.136062	-0.31208	-1.15636	0.456891	-0.293806
YCL043C	PDI1	-0.490031	0.19803	-0.530661	-1.21357	0.176117	-1.16923
YCL044C	MGR1	0.718668	0.716109	-0.795872	0.454639	0.644007	-1.44724
YCL045C	EMC1	NA	-0.0186568	-0.065457	NA	-0.275139	-0.417489
YCL047C	POF1	-0.245112	-0.551015	0.200965	-0.531447	-0.605468	0.304788
YCL049C	#REF!	0.554011	0.561718	0.407962	0.699505	0.131326	-0.00245148
YCL050C	APA1	-0.252695	-0.396619	-0.0371775	1.20298	0.877719	1.03747
YCL052C	PBN1	0.341595	-0.655352	-0.0752724	0.453318	-0.918572	0.0712979
YCL055W	KAR4	-0.672277	-0.71944	-0.086287	-0.277411	-0.712378	0.419928
YCL057W	PRD1	-0.942805	0.204159	0.196373	-2.03968	0.673702	0.414339
YCL059C	KRR1	0.107294	-0.33787	0.0359988	-0.0599425	-0.0449032	0.0650813
YCL061C	MRC1	NA	-0.0141615	-0.411382	NA	-0.187336	0.0774879
YCL063W	VAC17	0.701208	0.390184	-0.146472	0.716031	0.284533	-0.152275
YCL064C	CHA1	-0.381943	0.0649753	-0.0294729	-1.02862	-0.00660705	0.167474
YCR002C	CDC10	-1.1866	0.0122783	-1.51677	-1.81647	0.247438	-2.38327
YCR003W	MRPL32	0.274481	0.280108	-0.286144	-0.0182889	0.344095	0.116658
YCR004C	YCP4	-0.274407	-0.583155	-0.349721	0.606839	-0.320281	0.470302
YCR005C	CIT2	0.742761	0.740668	-0.199518	0.82365	0.49361	-0.189499
YCR008W	SAT4	0.216318	0.214064	-0.353003	-0.753839	0.280382	-0.523446
YCR009C	RVS161	0.949629	0.159489	0.0325679	0.432809	-0.139294	-0.149556
YCR011C	ADP1	NA	-0.124093	0.332243	NA	0.0344291	0.115289
YCR012W	PGK1	0.151241	0.0475828	0.285909	4.91684	3.86427	4.83031	yes
YCR016W	#REF!	0.310568	0.470757	0.303453	0.559577	0.679526	0.740035
YCR018C	SRD1	-0.363454	-0.201001	0.35376	-0.218125	-0.372966	0.366782
YCR020C	PET18	0.0268789	0.775949	-0.1496	-0.480846	0.938927	-0.987805
YCR020C-A	MAK31	0.396595	-0.0938631	-0.100343	-0.454716	-0.615416	-0.345698
YCR020W-B	HTL1	0.296241	0.386349	0.143281	2.02598	0.581079	1.66304	yes
YCR021C	HSP30	0.888207	0.783323	0.344895	0.978928	0.506925	0.356297
YCR023C	#REF!	0.5211	-0.0114956	0.14169	0.346325	0.26594	-0.527466
YCR024C	SLM5	0.932591	0.996914	0.642503	0.758611	0.633769	0.465808
YCR024C-A	PMP1	0.501856	0.0148431	-0.099334	0.431809	-0.0227799	-0.324073
YCR026C	NPP1	-0.225728	0.218965	-0.300212	-0.71775	-0.386444	-0.611537
YCR027C	RHB1	-0.0558765	0.117508	-0.190827	-0.931742	0.00580562	-0.131001
YCR028C-A	RIM1	-10.5656	-10.6398	-10.5821	-4.13131	-7.77385	-6.39477
YCR030C	SYP1	0.316969	-0.026668	0.0856792	0.350717	-0.862496	0.0390376
YCR031C	RPS14A	NA	-0.155138	-1.78686	NA	-0.330681	-1.47088
YCR033W	SNT1	-0.476438	0.0771679	-0.461299	-0.394678	0.239575	-0.779005
YCR034W	FEN1	0.121178	-0.0106081	0.400471	-0.156359	-0.162382	0.32574
YCR035C	RRP43	-0.231556	0.156751	0.401802	0.185989	0.349584	0.633034
YCR036W	RBK1	0.295509	-0.289959	0.521146	0.867952	0.0517946	0.780157
YCR037C	PHO87	-0.0148314	-0.458641	-0.1125	-0.387854	-0.458373	-0.156364
YCR038C	BUD5	0.578443	-0.498963	-0.476233	0.500196	-1.30043	-0.80338
YCR039C	MATALPHA2	0.438642	0.339632	0.551	0.354751	0.0725402	0.831299
YCR042C	TAF2	-0.512554	0.287343	0.208587	-0.321229	0.79131	0.163133	yes
YCR043C	#REF!	0.215557	0.436023	-0.0342192	-0.11187	0.290881	-0.000465611
YCR044C	PER1	-0.395138	-0.135655	0.0453919	-1.29698	-0.174149	0.304034
YCR046C	IMG1	NA	0.0563053	-0.427324	NA	-0.153888	-0.345698
YCR047C	BUD23	-1.31048	-1.0834	-0.739163	-1.41504	-1.08137	-1.02394
YCR048W	ARE1	-0.318176	-0.0630098	0.693362	-0.86912	-0.0862998	0.537481
YCR051W	#REF!	0.307866	-0.282241	-0.190898	0.0851588	-1.02661	-0.144132
YCR052W	RSC6	-0.305835	-0.210386	-0.431125	0.709443	0.82766	0.464988
YCR053W	THR4	0.0314782	0.636297	0.215411	1.62721	1.12369	1.4227	yes
YCR054C	CTR86	0.817423	0.157541	-0.149322	0.613568	0.166819	-0.208494
YCR057C	PWP2	0.44425	1.34284	-0.118618	0.86425	1.42407	0.0959387
YCR059C	YIH1	-0.596911	-0.106463	0.516548	-1.41819	0.169506	0.629183
YCR060W	TAH1	-0.655685	0.160298	0.839923	-0.410994	0.375176	0.707769
YCR063W	BUD31	0.184778	-0.192897	-0.092963	0.758611	-0.082599	0.0818931	yes
YCR065W	HCM1	-0.0341967	-0.376524	-0.00282604	-0.0620461	-0.712378	-0.443901
YCR066W	RAD18	-0.57571	-0.88168	-0.180836	-0.851356	-2.30458	-0.331972
YCR067C	SED4	0.305557	0.850055	0.285137	0.100345	0.784028	0.334123
YCR068W	ATG15	0.345065	1.02998	0.606447	-0.137234	0.82766	0.50696
YCR069W	CPR4	0.084131	0.334905	-0.516771	-0.0775366	0.221727	-0.336668
YCR071C	IMG2	-2.20482	-0.343446	0.176303	-2.42626	-0.372243	-0.111758
YCR073C	SSK22	0.842752	1.07101	0.251539	0.533211	0.966658	-0.00736697
YCR073W-A	SOL2	-1.06175	NA	-0.426059	0.255366	NA	1.06232	yes
YCR076C	FUB1	-10.5656	-10.6398	-10.5821	-4.44734	-5.02661	-7.8802
YCR077C	PAT1	0.0127946	0.553732	-0.348522	-0.153654	0.324186	-0.591099
YCR079W	PTC6	-0.768543	-0.125051	-0.0360192	-3.22987	0.0803276	-1.05262
YCR081W	SRB8	-0.118495	-1.15598	0.0344069	-0.534569	-1.40877	0.752799
YCR082W	AHC2	-0.746996	0.25275	0.519834	-0.245063	-0.0933605	0.661288
YCR083W	TRX3	0.0881626	0.218965	0.127803	-1.21342	0.150118	0.506098
YCR084C	TUP1	0.154123	0.76626	0.403131	1.21879	2.20996	1.30554
YCR086W	CSM1	-0.428062	0.0450879	0.0453919	-0.443271	0.183307	-0.115788
YCR087C-A	#REF!	0.660232	0.950326	0.43397	0.768469	1.29532	1.07981
YCR088W	ABP1	0.529819	0.708382	-1.48674	0.536937	0.155201	-2.0123
YCR090C	#REF!	0.571938	0.220882	-0.340715	0.287981	-0.0912491	-0.653607
YCR092C	MSH3	-0.0797488	-0.120157	-0.561162	-0.143183	-0.0478708	-0.738599
YCR093W	CDC39	-5.71823	0.194186	-0.066048	-6.42626	-0.203322	-0.0497285
YCR094W	CDC50	-0.348832	1.10167	0.388683	-1.26763	0.957473	0.314561
YCR095C	OCA4	-0.373285	-0.461128	NA	-0.113679	-0.707756	NA
YCR105W	ADH7	0.336003	0.189559	0.285549	-0.0225426	-0.176777	0.0462692
YDL001W	RMD1	-10.6724	-10.6777	-10.6817	-10.0112	-10.2761	-10.5976
YDL002C	NHP10	0.261765	-2.91869	-0.398507	1.88267	-3.14657	0.374361	yes
YDL003W	MCD1	0.802383	0.0641107	-0.403477	2.55657	1.83005	2.36345	yes
YDL005C	MED2	-0.037124	-1.14594	0.159325	0.660761	-0.496392	0.654302
YDL006W	PTC1	-0.500835	1.46382	0.20331	-1.35814	1.33431	-0.0896843
YDL008W	APC11	0.460074	0.232923	0.408435	0.54815	0.458585	0.781791
YDL010W	GRX6	0.880988	-1.61743	0.112216	0.330271	-2.05372	-0.0792958
YDL012C	#REF!	-2.01483	0.290944	-0.226791	-1.40383	-0.0645156	-0.744743
YDL015C	TSC13	0.371969	0.134458	-10.6817	0.432752	0.482099	-10.5976
YDL017W	CDC7	0.0890579	-1.25178	-0.227893	-0.126881	-1.17393	-0.168701
YDL018C	ERP3	-0.703759	0.223147	-0.154201	-1.04256	-0.330681	-0.624607
YDL019C	OSH2	1.1002	1.43334	0.243612	0.99188	1.46933	0.358209
YDL020C	RPN4	-0.20482	-0.457341	-1.67325	-0.14859	-1.33361	-1.62317
YDL021W	GPM2	-0.34712	0.525628	0.182508	-0.62321	0.467027	0.0659711
YDL022W	GPD1	-2.29412	-0.142939	-0.67075	-2.28069	-0.0122944	-0.893785
YDL025C	RTK1	0.182443	-0.358048	0.539305	-0.058486	-0.713882	0.381838
YDL027C	#REF!	0.184291	-0.153964	-0.393553	-0.0733615	-0.184596	-1.31338
YDL028C	MPS1	-1.00716	0.306382	0.0205569	-1.13723	0.257215	-0.0321988
YDL029W	ARP2	-2.08746	-2.18988	-2.96743	-1.93441	-2.28744	-3.16296
YDL030W	PRP9	0.306327	0.742831	0.495341	0.142525	0.89858	0.597967
YDL033C	SLM3	-0.297386	-0.673499	0.554337	-0.858942	-1.29884	0.142194
YDL036C	PUS9	0.74226	NA	0.96668	0.290269	NA	1.34015
YDL040C	NAT1	0.616195	-0.516965	0.462252	0.634052	-1.12382	0.238745
YDL042C	SIR2	-0.999524	0.374228	0.597145	-1.23868	0.583078	0.821631
YDL043C	PRP11	-0.0276677	0.12318	-0.429012	0.662965	0.136445	-0.878198
YDL044C	MTF2	-10.5656	-10.6398	-10.5821	-5.89212	-3.93734	-3.86227
YDL045C	FAD1	0.51183	0.411069	0.115173	0.544321	0.678799	0.203313
YDL045W-A	MRP10	-0.518873	-0.510301	-0.685911	-0.782409	-0.774287	-1.74584
YDL046W	NPC2	0.209453	0.143257	0.554337	-0.281607	0.506874	0.315302
YDL047W	SIT4	0.181664	0.285176	0.224461	-0.14859	0.563079	-0.431424
YDL048C	STP4	0.421652	0.649833	-0.416063	0.192121	1.23316	-1.20098
YDL052C	SLC1	-0.336759	0.875414	0.500007	-0.425422	1.02474	0.859922
YDL053C	PBP4	-0.866681	0.374169	0.147252	-2.25634	1.04072	0.19439	yes
YDL055C	PSA1	-2.92172	-2.76943	-1.81396	3.23602	1.88053	3.90305	yes
YDL056W	MBP1	-0.999524	0.0388072	-0.789352	-1.1166	0.200979	-0.39638
YDL057W	#REF!	0.385566	-0.751424	0.426193	0.310701	-0.471993	0.50963
YDL058W	USO1	0.718089	1.16151	-0.280646	0.758931	1.04861	-1.24502
YDL059C	RAD59	0.186803	0.0710135	0.230837	-0.159671	0.123568	0.555266
YDL060W	TSR1	0.0872668	-0.31224	-0.0488122	0.39841	-0.451918	-0.394769
YDL061C	RPS29B	-0.26637	-0.651108	-0.42859	1.12221	0.458404	1.01402
YDL063C	SYO1	-1.47521	-0.586284	-0.0441471	-2.62752	-0.336545	0.274318
YDL064W	UBC9	-0.776044	-0.625772	0.23644	-0.193224	-0.303913	0.68281
YDL065C	PEX19	0.222392	-0.545863	-0.241847	0.179832	-0.253757	-0.565541
YDL067C	COX9	0.0445239	-0.0204899	0.125217	-0.785922	-0.791667	0
YDL069C	CBS1	0.0324744	-0.865006	0.255486	0.172771	-1.3074	-0.0122993
YDL070W	BDF2	-1.76553	0.461192	-0.00131813	-3.45664	0.819932	-0.0506926
YDL072C	YET3	0.648939	0.10446	0.185601	0.762736	0.215729	0.132034
YDL074C	BRE1	-2.24817	NA	-1.39232	-1.5113	NA	-0.440573	yes
YDL076C	RXT3	-1.52014	0.166986	-0.411382	-1.56828	0.633019	-0.371175
YDL077C	VAM6	0.499377	0.475832	-0.201897	0.484628	0.0525505	-0.162959
YDL078C	MDH3	NA	0.766944	-0.120663	NA	0.937944	-0.505156
YDL080C	THI3	0.893629	0.116696	0.668709	1.08219	0.275584	0.442703
YDL082W	RPL13A	-0.968522	-1.25355	0.244618	-0.961379	-1.50463	0.469847
YDL084W	SUB2	-0.994706	-0.19189	-0.31208	-0.777608	-0.531291	-0.540949
YDL085C-A	#REF!	-0.260914	-0.0740933	-0.103305	0.394978	0.214726	-0.00980952
YDL087C	LUC7	0.609971	0.411416	0.33523	1.2627	0.842441	0.960268
YDL088C	ASM4	0.632867	1.05456	0.412918	0.392253	1.20343	0.136613
YDL089W	NUR1	0.665643	0.355974	0.659841	0.169175	0.05633	0.673626
YDL090C	RAM1	-3.17326	-0.506651	-0.367823	-3.85259	-0.154936	-0.432286
YDL091C	UBX3	-0.216071	0.106915	-1.47955	-0.302143	0.478763	-2.00513
YDL092W	SRP14	0.769812	0.742291	0.342671	0.867952	0.64882	0.628391
YDL095W	PMT1	-0.0781007	0.450919	-0.116576	-0.572435	0.319133	0.0516691
YDL097C	RPN6	-1.92172	-0.367163	-0.231203	-0.0410662	0.908146	1.38472	yes
YDL098C	SNU23	-0.67076	0.338918	0.298972	-0.143183	0.64942	0.838851
YDL099W	BUG1	-0.65701	NA	-0.130931	-1.5477	NA	-0.56004
YDL100C	GET3	0.551576	0.0192479	-0.0145661	0.299386	-0.438496	-0.0497285
YDL101C	DUN1	-0.134236	-0.438121	-0.46372	-0.147041	-0.373749	-0.436455
YDL103C	QRI1	0.256093	0.0970674	-0.809772	0.503487	0.0858194	-2.07795
YDL104C	QRI7	-10.5656	-0.0398801	0.427687	-5.81412	-0.144489	0.526647
YDL105W	NSE4	-0.698011	-0.889817	-0.189825	-0.407601	-1.32193	-0.00139728	yes
YDL106C	PHO2	-0.510296	-1.10646	-3.03525	-0.017652	-0.534077	-2.31338
YDL107W	MSS2	1.02641	-0.0718368	0.483274	1.00539	-0.154936	0.292732
YDL108W	KIN28	-0.614293	-0.393052	0.674656	0.451681	-0.269452	1.19073	yes
YDL109C	#REF!	-2.36101	-0.272378	-0.0218091	-2.96401	-0.51108	-0.32101
YDL110C	TMA17	-0.274407	0.134994	-0.22569	0.178745	0.161109	0.323397
YDL111C	RRP42	-0.385669	-0.235716	-0.399748	0.757335	-0.16124	0.284711
YDL112W	TRM3	0.437237	-0.183438	-0.178065	0.160749	-0.585433	-0.216282
YDL113C	ATG20	0.771036	0.784271	0.469339	0.554827	0.843465	0.213788
YDL115C	IWR1	-0.317651	0.61995	0.129525	-0.429051	0.596219	0.450721
YDL116W	NUP84	NA	0.188787	0.167727	NA	0.358687	-0.133041
YDL117W	CYK3	-0.134236	-0.975547	-0.430195	-0.396517	-0.612566	-0.111758
YDL119C	#REF!	0.0791187	0.0846624	-0.847207	-0.147041	0.520726	-1.32846
YDL120W	YFH1	0.81139	0.0467942	0.41174	-0.279908	0.110816	0.539404
YDL121C	#REF!	0.064822	0.367357	0.269607	-0.207096	0.709718	0.606984
YDL122W	UBP1	0.547953	0.372129	-0.0817648	0.597028	0.682428	-0.0267826
YDL123W	SNA4	-0.151807	-0.758856	0.715462	0.0695903	-2.59664	0.55976
YDL124W	#REF!	-0.120717	-0.153178	0.761784	0.436889	0.135387	0.933794	yes
YDL125C	HNT1	0.664639	-10.6777	-0.73331	0.91951	-10.2761	-0.873073
YDL126C	CDC48	-0.630766	0.250058	-0.697259	0.560525	1.18893	-1.58916	yes
YDL128W	VCX1	-0.740211	0.304561	-0.134783	-1.24636	0.391874	-0.0487651
YDL129W	#REF!	-0.333157	0.221294	-2.73665	-0.0121976	0.327192	-3.42076
YDL130W	RPP1B	-1.2618	-2.15195	-0.874783	-2.06769	-2.86696	-1.00737
YDL130W-A	STF1	-0.206927	0.796919	-0.407216	0.188252	0.814334	-0.744743
YDL131W	LYS21	-0.501249	0.0854927	0.116794	2.51576	2.22696	2.78328	yes
YDL132W	CDC53	-2.23915	-3.76943	-1.602	-2.95352	-3.82631	-2.24212
YDL133C-A	RPL41B	0.0949315	-0.194912	0.00394718	1.49805	0.958693	0.842763
YDL134C	PPH21	0.854074	0.17481	NA	1.29995	0.0956522	NA
YDL135C	RDI1	0.345065	-0.181386	0.202493	0.292203	-0.653423	0.29473
YDL136W	RPL35B	-1.54877	-1.01591	-0.67075	-2.14916	-1.00566	-0.886974
YDL137W	ARF2	0.358931	-0.590257	-0.277601	0.141058	-1.34243	-0.203124
YDL138W	RGT2	NA	-0.460974	0.110299	NA	-1.7723	-0.469593
YDL139C	SCM3	-10.6724	-10.6777	-10.6817	-10.0112	-10.2761	-10.5976
YDL140C	RPO21	-2.30819	-1.29106	0.0435669	4.19276	3.92374	6.38814	yes
YDL141W	BPL1	-0.0267669	0.60479	0.4275	0.154936	0.31259	0.505701	yes
YDL142C	CRD1	-0.122635	0.426969	0.206576	-0.524828	0.177023	-0.587414
YDL143W	CCT4	-10.6724	-10.6777	-10.6817	-10.0112	-10.2761	-5.4683
YDL144C	#REF!	-0.195981	-0.342877	0.440226	-0.515152	-0.0141952	0.318495
YDL145C	COP1	NA	-0.917831	-0.499283	NA	-1.18073	-0.527466
YDL146W	LDB17	0.00617451	0.0308634	0.0751765	-0.327337	-0.621199	-0.0818859
YDL147W	RPN5	-2.39565	-1.09097	-1.23341	-0.249869	-0.0714256	0.452512
YDL149W	ATG9	-0.103076	-0.653951	0.298972	-0.158164	-0.854982	0.225189
YDL150W	RPC53	1.2466	1.37458	0.594031	1.93654	1.75475	1.07574
YDL155W	CLB3	-1.57703	-0.261978	0.222957	-1.8214	-0.625073	0.423393
YDL156W	CMR1	-0.369786	-0.454925	0.0325679	-0.700614	-0.829041	0.0444647	yes
YDL157C	#REF!	0.715772	1.15908	0.435362	0.0864304	1.31891	0.217836
YDL159W	STE7	0.0998892	-0.193904	-0.0985949	0.267222	0.445829	-0.0769684
YDL160C	DHH1	-0.302828	-0.667891	-0.466145	0.314078	-1.13147	-0.821154
YDL161W	ENT1	-0.221214	0.457348	0.313383	-0.568284	0.605754	0.294956
YDL164C	CDC9	-0.552187	0.290227	-0.0920265	-1.32823	-0.0813676	-0.368768
YDL165W	CDC36	-0.587617	-0.944704	-0.759837	-0.8388	-1.0282	-1.30527
YDL166C	FAP7	-0.342783	0.424276	0.410088	-0.473332	0.371541	1.17074
YDL167C	NRP1	-0.917538	-0.70474	-0.0243592	-1.68031	-1.18866	-0.681708
YDL168W	SFA1	0.309855	0.507156	0.184056	0.261403	-0.0974596	0.117517
YDL170W	UGA3	0.314128	0.26186	-0.0910906	-0.2987	0.525584	-0.100733
YDL171C	GLT1	-0.408231	-0.131998	-0.092294	-0.57823	0.0761179	0.420843
YDL173W	PAR32	-0.0715832	-0.39927	0.630071	0.118056	-0.46716	0.464459
YDL174C	DLD1	-0.418373	0.190722	0.153414	-1.13131	0.406063	0.14771
YDL175C	AIR2	-0.396906	-0.75105	0.115694	0.467384	-0.632833	0.450721
YDL176W	#REF!	0.766458	0.0718741	0.343412	0.570949	0.0832467	0.0540849
YDL177C	#REF!	0.084131	-0.533061	0.0972208	-0.433798	-0.451166	-0.687694
YDL178W	DLD2	0.482909	-0.140944	-0.114536	0.474201	-0.854982	0.00611053
YDL181W	INH1	0.215782	-0.758679	-0.00849479	-0.120999	-0.672808	-0.216282	yes
YDL182W	LYS20	0.155711	-0.041095	0.146459	4.40715	2.70598	3.58729	yes
YDL184C	RPL41A	-0.314873	-1.26409	0.0187621	1.19273	-2.07155	0.684922
YDL185W	VMA1	0.493766	0.0658395	0.166889	0.636659	0.385305	-0.160465
YDL188C	PPH22	0.230461	-1.40139	-0.402233	-0.116602	-1.88076	-0.23058
YDL189W	RBS1	0.345065	-0.972681	-0.0763304	0.536006	-0.937344	-0.142779
YDL190C	UFD2	0.09798	-0.682691	-0.246752	0.353696	-1.08335	0.0230836
YDL192W	ARF1	-3.61714	-3.39232	-2.8615	-4.8413	-3.88381	-2.6907
YDL195W	SEC31	0.489966	-0.297259	-0.910188	0.926147	-0.967785	-0.687694
YDL197C	ASF2	0	-0.264092	0.281941	-0.340571	-1.15459	-0.152572
YDL201W	TRM8	0.508727	-0.0275654	0.554935	2.0021	1.45816	1.32425	yes
YDL202W	MRPL11	-0.824111	0.414811	-0.263599	-0.828426	0.427228	-0.811955
YDL203C	ACK1	-0.00176909	-0.391162	-0.995177	-0.753839	-0.607239	-1.59196
YDL204W	RTN2	-0.269413	0.0330868	0.0681918	-1.33175	0.109738	-1.14844
YDL205C	HEM3	0.244201	0.657671	0.570988	0.49061	1.10758	0.543243
YDL207W	GLE1	0.430189	0.016632	0.0814161	-0.356414	-0.0793634	0.15982
YDL209C	CWC2	-0.164699	0.271599	0.132104	-0.119532	0.502943	0.966548
YDL211C	#REF!	0.359976	0.185961	-0.248987	-0.131309	-0.412528	-1
YDL212W	SHR3	0.541286	-1.37394	0.202493	0.526962	-1.88811	-0.169227
YDL213C	NOP6	0.250902	0.491579	0.425539	1.08812	1.1585	0.866448
YDL215C	GDH2	-0.548304	-0.258813	0.0126802	-0.347669	-0.50794	-0.986562
YDL216C	RRI1	0.145228	-0.466116	0.57962	0.00134894	-0.293488	0.231462
YDL219W	DTD1	-0.219064	-0.420624	0.450593	-0.438165	-0.710836	0.328283
YDL220C	CDC13	-0.868294	-0.289702	0.377667	-1.32823	-1.02583	0.441332
YDL222C	FMP45	0.304139	-0.520373	0.00482287	0.34962	-0.689285	-0.255512
YDL225W	SHS1	0.365898	0.0795959	-0.0507605	0.754937	-0.238015	0.0634912
YDL226C	GCS1	0.556393	0.357767	0.315502	0.983833	0.635268	-0.0487651
YDL227C	HO	-3.71823	-10.6777	-10.6817	-5.10434	-10.2761	-10.5976
YDL228C	#REF!	-0.361007	-10.6398	-10.5821	-0.143183	-10.5812	-10.2021
YDL229W	SSB1	-0.310482	-1.81663	-10.6817	0.307316	-0.870983	-6.20527
YDL230W	PTP1	0.621774	0.896454	-0.328294	0.259882	0.740728	-0.242122
YDL232W	OST4	-10.5656	0.476551	-0.761963	-4.97458	0.386746	-1.16046
YDL233W	MFG1	-0.695213	0.300521	-0.580734	-0.814119	0.432122	-1.40122
YDL234C	GYP7	0.446516	-0.26939	0.779802	0.270703	-1.22356	1.10805
YDL235C	YPD1	-0.209923	0.185692	-0.197862	-0.365569	0.277505	0.379693
YDL236W	PHO13	0.399707	0.148034	-0.176859	1.35017	0.716106	0.204121	yes
YDL238C	GUD1	0.730587	-0.0195082	0.0118093	0.815321	-0.104948	0.101118
YDL240W	LRG1	-0.366364	0.807607	0.196373	-1.43003	1.27222	0.200885
YDL241W	#REF!	0.697717	-0.0248747	0.0368552	0.569031	-0.822854	-0.100733
YDR001C	NTH1	-0.13715	-0.112618	-0.52686	0.0166787	-0.23173	-0.451655
YDR003W	RCR2	0.28539	0.367234	0.471105	-0.329031	0.238978	0.172916
YDR004W	RAD57	-0.335558	-1.46987	-0.0763304	-0.76055	-1.94096	-0.619041
YDR005C	MAF1	-0.977197	0.7543	0.26742	-3.03395	0.855089	0.630029
YDR007W	TRP1	0.709382	0.768006	0.213898	0.746918	0.790032	0.124306
YDR009W	GAL3	0.27375	0.34326	0.0988621	0.610825	0.338585	-0.300671
YDR011W	SNQ2	0.323342	0.0476466	0.309844	0.807355	0.487088	0.463109
YDR012W	RPL4B	-0.314873	0.241144	0.464891	-0.0555773	0.316333	0.268919
YDR013W	PSF1	-0.709153	-1.03617	-0.0803048	-0.0355227	-0.926565	-0.113336
YDR014W	RAD61	-0.769539	0.116763	-0.329477	-0.864829	0.197698	-0.237783
YDR016C	DAD1	0.739344	0.235188	-0.278361	0.28225	-0.381528	-0.293731
YDR017C	KCS1	-0.987677	-0.194912	-1.03422	-2.56828	-0.0140296	-1.1505
YDR019C	GCV1	0.820823	0.32238	-0.497334	0.422777	0.363511	-0.844572
YDR020C	DAS2	-0.592598	0.209612	0.322493	-0.0410662	0.596842	0.51812
YDR021W	FAL1	-0.187283	0.088978	0.390838	0.22682	0.861743	0.6889	yes
YDR022C	ATG31	0.0757675	0.597823	0.0419833	-0.140863	0.903785	-0.206343
YDR025W	RPS11A	0.548558	-0.27684	0.166945	0.473596	-0.260709	-0.231265
YDR026C	NSI1	-0.33927	0.195724	0.844332	-0.587061	-0.936274	0.768735
YDR027C	VPS54	0.165741	0.425623	0.105234	-0.830825	0.457033	-0.261076
YDR028C	REG1	-0.464191	0.482152	0.203256	-0.511381	0.530425	-0.0809021
YDR032C	PST2	0.591137	0.748224	0.308122	0.0659482	0.579301	0.257308
YDR033W	MRH1	0.350636	0.225409	0.0222259	0.0986034	-0.294557	-0.235643
YDR034C	LYS14	-5.02857	-10.6777	-4.61559	-5.48767	-5.88381	-4.05843
YDR034W-B	#REF!	0.336797	0.228258	-0.427324	-0.835634	0.0517946	-0.51038
YDR035W	ARO3	-0.213535	0.307844	0.0751765	0.185881	1.00798	1.01583
YDR036C	EHD3	0.78812	1.22284	-0.0141859	0.748525	0.874127	-0.210602
YDR038C	ENA5	-0.257239	-0.125079	0.300501	-0.797604	-0.116655	0.448928
YDR039C	ENA2	-0.0888319	-0.476143	-1.19628	-0.0272472	-0.540911	-1.81411
YDR040C	ENA1	-0.399415	-0.0765966	0.359639	-0.536525	-0.395086	0.430871
YDR041W	RSM10	0.913191	0.257296	-0.255712	0.730744	-0.20399	-0.873449
YDR043C	NRG1	0.578443	-0.0426715	0.508632	0.388134	-0.665321	0.500049
YDR044W	HEM13	-0.0053138	-0.171908	0.460429	0.879037	-0.958712	1.16355
YDR046C	BAP3	-0.794089	-0.22194	0.432576	-1.28397	-0.206161	0.222042
YDR047W	HEM12	0.926275	-0.988741	0.585903	0.935133	-0.761022	0.386591
YDR049W	VMS1	-0.431152	0.750376	-0.548719	0.349465	0.757536	-0.132003
YDR050C	TPI1	-0.139096	0.367357	-0.773285	2.18783	1.59617	-0.665372	yes
YDR051C	DET1	NA	0.122371	0.342769	NA	0.540859	0.16977
YDR052C	DBF4	-0.863461	-0.0602522	-0.0632922	-2.78241	0.151188	0.200885
YDR054C	CDC34	-0.849616	0.139926	-0.230099	0.379861	0.584335	0.882685
YDR055W	PST1	-1.59116	-0.551005	-0.765158	-1.77664	-0.726332	-1.22484
YDR056C	#REF!	-0.114962	-0.183864	0.437912	-0.383693	-0.164989	0.377544
YDR059C	UBC5	0.33039	-1.00529	0.206304	-0.0225426	-1.0425	0.644396
YDR060W	MAK21	-0.709153	-0.260415	0.00469781	-0.23391	0.161951	0.109624
YDR061W	#REF!	-0.426027	-0.513088	0.0946966	-1.16723	-0.717014	-0.386741
YDR062W	LCB2	-0.0303736	-0.00441057	-0.0532321	-0.698344	-0.308898	-0.257737
YDR063W	AIM7	-0.136171	-0.0880846	0.57962	-0.285613	0.0344291	0.729352
YDR065W	RRG1	-0.36468	-0.888249	-0.151689	-0.405621	-1.16124	0.087895
YDR066C	RTR2	0.0109062	0.604571	0.125217	0.346284	0.661378	-0.0857799
YDR067C	OCA6	-1.81134	-1.59026	0.32955	-4.51937	-2.49476	0.4509
YDR068W	DOS2	-0.78258	-0.679791	0.491999	-1.13723	-1.0401	0.638654
YDR069C	DOA4	-0.575474	-0.340585	-0.241179	-0.667583	-0.637221	-0.916722
YDR070C	FMP16	0.0891259	-0.315776	0.118413	-0.38005	-1.78828	0.154794
YDR071C	PAA1	-1.60903	-0.469485	-0.128048	-1.92908	-0.488222	-0.164002
YDR072C	IPT1	0.760851	0.24895	-0.095307	0.821361	0.137332	-0.651377
YDR073W	SNF11	-0.304659	0.182778	0.175248	-1.31721	0.0390192	0.580055
YDR074W	TPS2	0.0210616	0.288786	0.0445405	0.388585	0.918017	0.00974327
YDR075W	PPH3	-0.206859	0.241144	0.494495	-0.108852	0.0161972	0.317545
YDR076W	RAD55	0.106847	-0.492588	-0.766759	0.490623	-0.955492	-1.25668
YDR077W	SED1	0.983725	0.728714	0.247581	0.807548	0.584963	-0.137381
YDR079C-A	TFB5	-0.397465	-1.17787	-0.0734228	-0.147041	-1.2621	-0.263314
YDR079W	PET100	0.574613	0.604571	0.20331	-0.161179	0.54098	0.223092
YDR080W	VPS41	0.671034	0.600402	0.0858566	0.46836	0.472725	-0.247928
YDR081C	PDC2	0.129283	-3.03386	-2.64825	0.0602351	-3.52124	-2.7647
YDR083W	RRP8	-0.392815	0.101179	0.476932	-0.593375	0.206684	0.843801
YDR084C	TVP23	1.00996	1.22671	-0.0713778	1.15954	0.923618	-0.281771
YDR087C	RRP1	0.0924462	-2.57969	0.00307097	0.86759	-1.76437	0.331671
YDR088C	SLU7	0.33039	0.31946	-0.320831	0.607158	0.74555	-0.511451
YDR089W	#REF!	0.778163	0.564778	-0.517399	0.762117	0.523398	-0.063852
YDR090C	#REF!	-0.504882	0.588425	0.198398	-1.31385	0.448087	-0.0435141
YDR091C	RLI1	-1.37823	-1.88491	-1.41724	-1.52289	-2.69246	-1.36923
YDR092W	UBC13	-0.651445	1.17129	0.424231	-0.0168738	1.66749	0.771465
YDR093W	DNF2	-10.6724	-10.6777	-10.6817	-10.0112	-6.18866	-10.5976
YDR096W	GIS1	0.41884	-0.688508	-0.316527	0.900127	-0.977574	0.249087
YDR097C	MSH6	-0.525288	0.282792	0.040825	0.770053	1.01546	1.3022
YDR098C	GRX3	0.476051	0.83255	0.339302	1.31857	1.51463	0.67037
YDR099W	BMH2	-0.763062	-0.0737389	0.412918	0.294406	0.283759	1.50005
YDR100W	TVP15	-3.90424	0.0970674	0.159887	-6.31079	0.188421	0.112358
YDR101C	ARX1	-0.889621	-0.110362	-0.747671	1.03599	1.26664	1.15102
YDR103W	STE5	-1.35856	0.449658	0.277393	-1.36508	0.52863	0.410745
YDR105C	TMS1	-0.190539	0.732528	0.00188096	-0.153654	0.758649	-0.262545
YDR108W	TRS85	-0.200349	0.0906772	0.288993	-0.272512	0.0149892	0.554432
YDR109C	#REF!	0.429482	0.429657	-0.0793102	0.366314	0.605533	-0.49304
YDR110W	FOB1	0.302706	0.413054	-0.0405291	-0.372791	0.330281	0.382553
YDR111C	ALT2	0.238553	-0.39781	0.0653164	0.311907	-1.28888	0.427233
YDR115W	#REF!	-0.87558	-3.74498	-4.74925	-0.772027	-4.55883	-5.11466
YDR116C	MRPL1	0.839031	0.805222	-0.850823	0.2222	0.663758	-0.827084
YDR117C	TMA64	0.209453	0.0510512	-0.560144	-0.553846	-0.2705	-1.24224
YDR118W	APC4	0.325446	-1.26475	1.08541	-0.196313	-1.26832	1.17617
YDR120C	TRM1	-0.0439777	0.441025	NA	0.482918	0.144166	NA
YDR121W	DPB4	-0.285968	NA	-0.197358	1.24002	NA	1.11246	yes
YDR122W	KIN1	-2.20482	0.520725	-0.0225737	-4.17834	0.556766	-0.305265
YDR123C	INO2	0.338304	0.016632	0.277393	0.569131	0.133903	0.353424
YDR124W	#REF!	0.242582	0.313676	-0.0822961	1.0556	0.625203	0.462323	yes
YDR127W	ARO1	0.268622	-0.841669	0.32605	0.542402	-0.586126	0.62762
YDR128W	MTC5	-9.56558	0.379103	0.496676	-10.062	0.169506	0.276646
YDR129C	SAC6	0.38489	0.115884	0.470607	-0.0908744	0.105419	0.400298
YDR132C	#REF!	-0.583637	-0.275774	-1.30013	-1.22987	-0.457542	-2.42766
YDR135C	YCF1	0.275986	0.643874	0.626092	-0.614963	0.498284	0.0936451
YDR137W	RGP1	0.216318	0.571394	0.391125	-0.874236	0.561504	0.503075
YDR138W	HPR1	-0.540568	0.180261	-1.31754	0.661198	1.61831	-1.43268	yes
YDR139C	RUB1	-0.00715742	-0.449968	-0.343737	-0.232323	-0.85328	-0.289234
YDR140W	MTQ2	0.67938	NA	0.567605	0.971377	NA	0.56854
YDR141C	DOP1	0.24419	0.978593	-1.70256	-0.816493	0.950668	-2.55107
YDR142C	PEX7	1.02594	0.0432017	-0.1496	1.0373	-0.246927	-0.494765
YDR143C	SAN1	0.645093	0.458897	0.213086	0.469335	0.276003	0.133267
YDR144C	MKC7	0.984893	0.327905	0.0144205	0.796933	0.0322146	-0.322627
YDR145W	TAF12	-0.150893	0.400497	0.417153	0.110381	0.522743	0.936148
YDR146C	SWI5	-0.430442	0.385675	-0.239771	-0.342342	0.58341	-0.3308
YDR147W	EKI1	0.278343	0.150556	-0.285226	0.0723802	0.143313	-0.447236
YDR148C	KGD2	-0.0249669	0.55949	0.436615	-0.0864148	-1.1037	0.0489717
YDR150W	NUM1	-0.00708942	0.0754971	0.80566	-0.170449	-0.756488	0.618553
YDR152W	GIR2	-0.375509	0.275022	0.423576	-0.931742	0.630766	0.358063
YDR153C	ENT5	-0.148781	1.1201	0.292071	-0.410994	1.26429	0.402429
YDR155C	CPR1	-0.208901	0.0519011	-0.14155	1.13279	2.06595	1.24083	yes
YDR156W	RPA14	-0.741688	0.393072	0.114362	-1.4682	0.474583	-0.126928
YDR158W	HOM2	0.214141	-2.31336	-0.274941	2.30209	-1.23913	1.02489
YDR159W	SAC3	0.510569	1.04496	0.436754	0.331344	0.825536	0.0362809
YDR161W	#REF!	-0.732846	-0.460974	-0.402067	0.345225	-0.0691101	-0.407762	yes
YDR162C	NBP2	0.179324	0.141661	-0.270167	0.474602	0.495365	-0.137131
YDR164C	SEC1	-0.651193	-0.402583	-0.701028	-1.11953	-0.794931	-1.26843
YDR165W	TRM82	0.123614	-0.473148	-0.829929	1.56997	0.485427	0.349319
YDR166C	SEC5	-0.00333571	1.42899	0.687569	-0.020387	1.17327	0.382839
YDR167W	TAF10	-0.488763	-0.547036	-0.985952	-0.205621	-0.104454	-0.862274
YDR168W	CDC37	-0.218126	-0.0374747	0.058103	-0.728139	-0.381307	-0.565541
YDR169C	STB3	-0.110251	1.30894	0.829899	-0.183995	1.65062	0.91357
YDR170C	SEC7	1.01185	0.213517	0.147479	1.49972	-0.00282789	-0.39316
YDR170W-A	#N/A	-10.6724	-10.6777	-10.6817	-10.0112	-10.2761	-8.01262
YDR171W	HSP42	-0.462972	0.207977	NA	-0.278212	0.0322146	NA
YDR172W	SUP35	-0.213535	0.458897	0.664005	-0.0190189	0.708242	0.353424	yes
YDR173C	ARG82	1.08861	1.31003	-10.5821	1.11724	1.11141	-5.24793
YDR174W	HMO1	-0.789145	0.329594	-0.0429832	1.83958	1.24217	0.861271
YDR175C	RSM24	-0.261797	0.354561	-0.0803048	-1.03414	0.421614	-0.951825
YDR176W	NGG1	-0.0912248	0.024453	0.107856	0.439984	0.771	0.4317	yes
YDR177W	UBC1	-0.847902	-0.161023	-0.28867	0.172771	0.186984	-0.023459
YDR178W	SDH4	0.51324	0.849051	-0.48148	0.16557	0.483542	-1.3724
YDR179C	CSN9	0.0926333	-0.132989	0.15595	-0.608776	0.055424	-0.262545
YDR179W-A	#REF!	0.0724085	-0.157101	0.198671	-0.760929	0.0637256	0.0480714
YDR180W	SCC2	-0.245906	-0.7299	-0.201681	-0.125408	-0.392612	0.0469896
YDR181C	SAS4	-0.0052453	0.500398	0.249165	0.195342	0.525362	0.301702
YDR182W	CDC1	0.208689	0.122371	0.409758	0.323046	0.0253718	0.161469
YDR183W	PLP1	0.434792	0.110183	NA	0.0709218	0.287072	NA
YDR184C	ATC1	0.291625	-0.325776	0.377136	-0.138719	-0.557446	0.0410502
YDR185C	UPS3	-0.0293309	0.490778	0.0435669	-0.648418	0.32569	-0.420764
YDR186C	#REF!	-0.912537	0.210262	-1.04505	-1.95053	-0.641313	-1.02963
YDR189W	SLY1	0.310171	0.182778	-0.261341	-0.292208	-0.0615643	-0.420764
YDR190C	RVB1	-0.0449595	-0.981581	-0.681275	2.85084	0.868464	1.73819	yes
YDR191W	HST4	0.00176693	0.330709	0.469339	0.151164	-0.0187366	0.505045
YDR194C	MSS116	1.05922	0.653104	0.381477	1.17815	0.630688	0.201953
YDR195W	REF2	0.135728	0.188344	-0.204931	2.40173	1.62031	1.79329	yes
YDR196C	CAB5	0.714032	0.53638	0.108729	0.716852	0.491602	0.396859
YDR197W	CBS2	0.0614374	-0.968636	-0.171903	-0.00419999	-1	-0.564164
YDR198C	RKM2	-0.735855	-0.421835	-0.17913	-0.661167	-1.57277	-0.167325
YDR200C	VPS64	0.561126	-0.51051	0.385805	-0.302158	-0.798202	0.265482
YDR201W	SPC19	0.0997578	0.303455	-0.322399	0.0333509	-0.0953713	-0.202124
YDR202C	RAV2	-0.171583	-0.548437	0.0487925	-0.616765	-0.976916	0.106317
YDR205W	MSC2	0.396353	-0.332314	-0.440886	0.198226	-0.833181	-0.84437
YDR207C	UME6	0.136539	0.359141	0.210865	0.426525	0.49206	0.642011	yes
YDR210W	#REF!	0.987571	0.189137	0.335976	0.777158	-0.0923562	0.183739
YDR211W	GCD6	-0.0846478	0.0079052	-0.520546	-0.295265	-0.144267	-0.990257
YDR213W	UPC2	-0.121599	-0.746491	0.792354	-0.318895	-0.47137	0.523242
YDR214W	AHA1	-0.330351	-0.350167	-0.213054	0.274175	0.365927	0.476554
YDR216W	ADR1	-0.530318	0.564264	-0.148348	-0.966833	1.0891	-0.255512
YDR217C	RAD9	-0.290882	0.410406	-0.0270416	1.09403	1.22223	1.26078	yes
YDR219C	MFB1	0.07014	-0.553657	-0.565334	-0.867289	-0.796566	-0.414221
YDR221W	GTB1	0.618677	0.377712	0.0481251	0.384003	0.35249	-0.21202
YDR222W	#REF!	-0.561358	-0.565651	0.198398	-1.37905	-0.258146	-0.286244
YDR224C_1	HTB1_1	-3.78945	-5.01663	-6.69673	5.84903	3.6331	2.50001
YDR224C_2	HTB1_2	-3.50459	-4.89796	-6.5545	5.83818	3.55383	2.45541
YDR224C_3	HTB1_3	-4.06018	-5.83144	-6.77479	4.80153	2.57407	1.72337
YDR226W	ADK1	-0.0467165	0.331409	-0.627752	1.87142	1.47416	0.44544	yes
YDR227W	SIR4	0.321928	0.290947	0.0377112	-0.0731179	0.486258	-0.445302
YDR228C	PCF11	-0.376656	-0.121214	0.353809	2.29626	1.6221	2.5927	yes
YDR229W	IVY1	0.577805	0.735247	1.11091	0.148625	0.463876	0.887989
YDR231C	COX20	0.399707	-1.78898	0.118413	0.13088	-1.47522	-0.0671807
YDR232W	HEM1	0.654195	0.112588	0.171075	0.110381	-0.197496	-0.262545
YDR233C	RTN1	-10.6724	-10.6777	-10.6817	-10.0112	-5.63227	-10.5976
YDR234W	LYS4	0.000883734	0.0510512	-0.436125	-0.197446	0.370434	-0.909337
YDR235W	PRP42	-0.395138	-0.99824	-0.0360192	0.166192	-0.0789077	1.11623	yes
YDR236C	FMN1	-0.0321804	0.188014	0.115173	-0.535494	0.136445	0.393935
YDR238C	SEC26	0.553987	-0.460974	-0.46372	0.537595	-1.13147	-0.730308
YDR239C	#REF!	-0.107323	-0.410933	-0.285073	-1.08939	-1.41504	-0.561413
YDR240C	SNU56	0.0426767	0.360911	-0.213636	0.983031	0.786214	0.541028	yes
YDR243C	PRP28	0.682375	-0.489131	-0.43375	1.40557	-0.764372	-0.0267826
YDR244W	PEX5	0.278859	0.307411	0.364082	0.569031	0.149091	0.358063
YDR245W	MNN10	0.434138	-0.0676176	-0.498042	0.352907	-0.295985	0.00139593
YDR246W	TRS23	0.0495283	-1.81353	0.639123	-0.167306	-1.18601	0.620976
YDR247W	VHS1	1.22924	0.437023	0.204944	0.862766	0.639178	-0.0805903
YDR248C	#REF!	0.382059	0.499119	0.647878	0.055597	0.568547	0.730091
YDR250C	#REF!	0.782043	0.158679	-0.0381435	0.516327	-0.30043	-0.757109
YDR251W	PAM1	0.474143	NA	0.436615	-0.165737	NA	0.118375
YDR252W	BTT1	-0.898467	-0.213528	-0.0132358	-0.584288	-0.609657	0.248056
YDR253C	MET32	-0.0339894	-0.926176	0.435316	-0.26976	-0.567041	0.211377
YDR254W	CHL4	0.35403	-0.251776	0.187696	0.340966	-0.523209	0.61965
YDR256C	CTA1	-0.614293	-0.0642536	-0.963756	-1.02862	0.0841353	-0.75918
YDR257C	RKM4	-0.503532	-1.15598	0.199218	0.244016	-0.294643	1.18266	yes
YDR258C	HSP78	-10.6724	-10.6777	-10.6817	-10.0112	-6.46877	-6.34966
YDR259C	YAP6	-1.33436	0.724342	0.0999748	-1.76284	0.753631	0.135498
YDR261C	EXG2	-0.0949965	0.261125	NA	-0.122484	0.347757	NA
YDR262W	#REF!	0.586707	0.333904	0.440226	0.604178	-0.112577	0.282699
YDR264C	AKR1	-0.157248	0.0510781	0.453344	-0.629504	0.15858	0.330232
YDR266C	HEL2	-0.624531	0.107561	0.304317	1.21582	0.847683	1.36631	yes
YDR267C	CIA1	0.146089	0.909992	0.871643	-0.724424	0.914155	0.987701
YDR268W	MSW1	0.824591	0.710041	0.0590066	0.0864304	0.627643	-0.696312
YDR272W	GLO2	0.212508	-0.142444	0.289147	0.764383	-0.382823	0.587908
YDR275W	BSC2	-0.259516	-0.587225	0.116563	-0.443661	-0.346383	-0.0409919
YDR276C	PMP3	0.24419	-0.491316	-0.607727	-0.225996	-1.33803	-0.620923
YDR277C	MTH1	0.10483	0.678732	-0.208987	-1.22987	0.678799	-0.104732
YDR279W	RNH202	0.193478	-0.242118	-0.109451	0.883398	0.161951	0.19662
YDR280W	RRP45	-0.129908	-1.00862	0.153414	1.01276	-0.476602	0.903785
YDR283C	GCN2	-0.0697231	1.0126	0.61753	-0.742374	0.975305	0.392201
YDR284C	DPP1	0.118294	0.0049647	0.290533	-0.785922	-0.0266117	0.119804
YDR285W	ZIP1	0.699896	-0.170916	-0.0324215	0.635331	-0.84986	0.0924109
YDR288W	NSE3	-0.667733	-0.269105	0.0508532	-0.0634557	-0.0537236	0.216783
YDR289C	RTT103	0.115477	0.0838316	-0.0678882	3.19579	2.90207	1.98291	yes
YDR291W	HRQ1	-0.707597	-0.879905	-0.138162	-0.503625	-0.741997	0.479115
YDR292C	SRP101	-2.27155	0.34326	-0.309901	-4.12858	0.259151	-0.775813
YDR293C	SSD1	0.173065	0.513957	-0.163024	-0.881944	0.420843	-0.0613398
YDR294C	DPL1	0.790588	0.305274	0.260837	0.639824	0.0880102	0.319785
YDR295C	HDA2	-0.10542	-0.0852626	0.24832	0.0881206	-0.189988	0.313056
YDR296W	MHR1	-0.280176	-0.679791	-0.115556	-0.700102	-0.551913	-0.290732
YDR297W	SUR2	-1.23242	0.167562	0.21714	-1.24826	-0.0151465	0.48962
YDR298C	ATP5	0.431518	-0.655352	-0.0957762	0.13852	-1.27894	0.0818931
YDR299W	BFR2	-0.797394	-0.594033	-0.219102	-0.842878	-0.143449	-0.289234
YDR300C	PRO1	0.541286	0.552301	0.0773783	1.45179	1.48001	1.0162
YDR301W	CFT1	-2.3237	0.760552	0.00744675	-3.21681	2.25306	1.03949	yes
YDR302W	GPI11	-0.63632	0.00856469	-0.0912911	-1.26438	0.0307464	-0.240674
YDR303C	RSC3	0.166778	0.714598	0.583937	1.48063	1.99796	1.48056	yes
YDR305C	HNT2	0.782388	0.185692	-0.340715	0.218793	0.584187	-0.476054
YDR307W	PMT7	0.554589	0.438624	-0.159096	0.63353	0.622477	-0.0220478
YDR308C	SRB7	-0.614434	0.616327	-0.70583	-3.36737	0.846056	-0.854436
YDR309C	GIC2	0.164043	0.913356	0.44369	0.318415	0.938436	0.477356
YDR310C	SUM1	-10.5656	-2.62298	-1.0199	-4.85259	-2.99624	-0.75918	yes
YDR311W	TFB1	-10.5656	-10.6398	-10.5821	-5.66973	-6.41128	-6.0322	yes
YDR312W	SSF2	0.371969	-1.03928	0.0187621	0.481627	-1.40885	0.0217159
YDR313C	PIB1	-0.182577	0.0235868	0.020495	-0.801774	0.213724	-0.0173285
YDR314C	RAD34	-0.550163	0.412775	-0.432395	-0.619103	0.128745	-0.508637
YDR316W	OMS1	1.06605	-0.842131	0.0955777	0.988483	-0.97387	-0.755041
YDR318W	MCM21	0.0622843	0.739078	0.364764	0.057551	0.995339	-0.00326244
YDR319C	YFT2	-0.0531224	0.250799	-10.6817	-0.283307	0.253306	-10.5976
YDR320C	SWA2	0.215557	0.0425246	0.893862	-0.452807	-0.0389144	0.677956
YDR320C-A	DAD4	-0.147726	-0.722421	0.0325679	-0.0578257	-0.756242	0.00244732
YDR322C-A	TIM11	-0.621216	-1.42269	0.416354	-0.939765	-1.25932	0.480564
YDR322W	MRPL35	0.216318	-0.252504	0.190997	-0.184679	-0.300276	0.184592
YDR323C	PEP7	-0.307012	-0.611887	-0.290971	-0.663302	-0.336837	-0.884711
YDR324C	UTP4	-0.802366	-0.942825	-1.50266	-0.134268	-0.778684	-2.71027
YDR325W	YCG1	-0.0647363	-0.780258	-0.545968	-0.211859	-0.34878	-0.607799
YDR326C	YSP2	-0.259516	0.395006	-4.43239	-0.940513	0.40108	-2.7675
YDR329C	PEX3	-1.08934	-0.359177	-0.567935	-0.864022	-1.00233	-2.83604
YDR330W	UBX5	0.540679	0.475832	-0.0910906	0.0762356	-0.0187366	0.202504
YDR331W	GPI8	-0.145618	0.217411	0.0635165	-0.245063	0.234183	-0.0767104
YDR332W	IRC3	0.380597	-0.39424	-0.256837	-0.317212	-0.687899	-0.0122993
YDR333C	RQC1	0.552782	0.284453	-0.633191	0.375713	0.536855	-1.09376
YDR334W	SWR1	0.0692329	0.157058	0.179409	0.314079	0.0814678	0.573486
YDR335W	MSN5	-1.14141	-0.0651994	-0.189825	-0.548319	0.172852	0.115289
YDR337W	MRPS28	0.392991	-0.586284	-0.0486825	-0.0819688	-0.6197	-0.132021
YDR338C	#REF!	0.623917	0.73485	0.511232	0.766028	0.704729	0.172251
YDR341C	#REF!	-10.6724	-10.6777	-10.6817	-10.0112	-5.06667	-10.5976
YDR342C	HXT7	0.626098	-0.775607	-0.389849	0.240593	-0.942765	-0.666848
YDR345C	HXT3	0.161491	0.618184	0.689321	-0.842878	0.522743	0.802799
YDR346C	SVF1	-0.0931094	0.121562	0.341384	0.758611	1.09347	0.683763
YDR347W	MRP1	-0.32702	-0.584963	-0.925121	-0.591267	-2.65407	-1.60041
YDR348C	PAL1	1.04683	1.34534	0.420673	1.24572	1.2682	0.406131
YDR349C	YPS7	NA	0.504228	0.343412	NA	0.351014	0.410745
YDR352W	YPQ2	-0.566988	-0.229342	-0.0285127	-1.89714	-0.459667	-0.00859846
YDR353W	TRR1	-0.835957	-0.934161	-0.423532	2.76708	1.8138	2.78336	yes
YDR354W	TRP4	-0.626666	-2.07039	-0.320831	-0.945138	-2.71388	-0.208494
YDR356W	SPC110	0.4157	-0.390007	0.140096	0.148644	-0.218133	0.335366
YDR357C	CNL1	0.228441	0.445108	0.302029	-0.153246	0.305076	0.0471706
YDR358W	GGA1	0.942712	0.112588	-0.707161	0.677734	0.191114	-0.842374
YDR361C	BCP1	-0.682321	-1.85754	-2.30664	0.216389	-1.58264	-3.02773	yes
YDR362C	TFC6	0.319805	0.326501	1.0205	-0.145494	0.254282	0.858254
YDR363W	ESC2	-0.303919	0.0122783	-0.374477	0.222392	0.240561	-0.42641
YDR363W-A	SEM1	-0.52014	-0.450104	-0.60086	0.283393	-0.0341413	-0.00793589
YDR364C	CDC40	0.428068	0.650226	0.076962	0.373624	0.855511	0.00732954
YDR365C	ESF1	-0.386913	-0.0823292	-0.00282604	-0.379052	-0.17181	-0.277311
YDR367W	KEI1	-0.226842	-1.27785	0.0902834	-0.802303	-1.37175	0.126551
YDR368W	YPR1	-0.0052453	0.292422	0.260208	0.554503	0.716289	0.904439
YDR369C	XRS2	-0.251561	-0.0890461	0.286681	-0.48273	-0.197496	-0.0922932
YDR370C	DXO1	0.882643	-0.497811	-0.238734	1.02426	-0.358752	-0.408998
YDR371W	CTS2	0.922262	1.30162	-0.663279	0.521977	1.00564	-1.50864
YDR372C	VPS74	0.468533	-1.4774	-0.184467	0.125306	-1.31207	-1.11201
YDR373W	FRQ1	0.403089	-0.104518	-0.0783162	0.438796	0.125295	-0.336391
YDR375C	BCS1	0.533112	0.686637	0.262564	0.410645	0.070748	0.0901978
YDR376W	ARH1	0.482393	-0.0447244	0.220697	0.315202	0.0770224	0.229756
YDR377W	ATP17	0.468533	0.695039	0.263348	0.106626	1.00751	-0.330219
YDR379C-A	#REF!	0.618677	-1.22616	-0.532293	0.242876	-2.47268	-0.784271
YDR379W	RGA2	-0.620134	0.0022588	0.402276	-1.40741	-0.168631	-0.536788
YDR380W	ARO10	-0.210227	0.89451	0.206576	0.378823	1.1253	0.583329
YDR382W	RPP2B	-2.5639	-2.27258	-2.11182	-2.8413	-1.82491	-2.43772
YDR384C	ATO3	0.545558	-0.32918	-0.216913	0.115373	-0.882496	-0.277311
YDR385W	EFT2	-0.202784	0.214823	-0.327428	1.69441	1.64237	0.584186
YDR386W	MUS81	-0.832563	-0.263668	-0.0763304	-0.452867	-0.192107	0.191267
YDR388W	RVS167	-0.0312767	-0.171908	0.689554	-0.843809	-0.320474	1.04987
YDR389W	SAC7	0.788671	-0.48371	0.27972	0.41166	-0.858393	-0.00736697
YDR390C	UBA2	0.346563	-0.216677	0.353023	2.06143	0.896052	1.78194
YDR391C	#REF!	0.357006	0.575133	-0.0304337	-0.191681	0.609241	-0.233457
YDR392W	SPT3	-1.01483	-0.0823292	-0.297896	-0.0578257	-0.139294	-0.0857799
YDR393W	SHE9	0.841158	0.528252	0.142372	0.433809	0.0841353	-0.275828
YDR395W	SXM1	0.304016	0.642137	-0.586375	2.01677	1.34101	0.307651
YDR397C	NCB2	0.0683253	0.478499	0.295142	2.18023	1.83216	2.2181	yes
YDR398W	UTP5	0.806743	0.487557	0.431878	1.27669	0.603675	0.665155
YDR399W	HPT1	-1.10001	-1.18447	-10.5821	1.28447	0.475437	-10.2021	yes
YDR400W	URH1	NA	-0.835369	0.613517	NA	0.0310764	0.522003
YDR404C	RPB7	-1.016	-0.485427	0.192535	4.50046	3.60547	4.7063	yes
YDR405W	MRP20	0.692988	0.746609	0.12349	0.092772	0.224543	0.0434289
YDR407C	TRS120	0.362374	0.0771679	0.225964	-0.0953479	0.167855	0.00603931
YDR408C	ADE8	0.603117	0.196493	0.553738	0.971766	0.529619	0.531696
YDR409W	SIZ1	0.110573	0.0493499	0.763855	0.492598	0.191481	0.832866
YDR410C	STE14	0.671034	1.64272	0.689905	0.0915059	1.87078	0.965921
YDR411C	DFM1	-0.264082	-0.493861	-0.123735	-0.902175	-0.222549	0.0924969
YDR412W	RRP17	0.650066	0.233672	0.587449	0.88813	0.23464	0.474546
YDR416W	SYF1	-0.708084	0.332808	-0.511753	-1.32123	0.507692	-0.826098
YDR418W	RPL12B	0.210855	0.758951	-0.286373	0.619192	0.880279	-0.515623
YDR419W	RAD30	-0.0053138	0.257445	-0.78686	0.0152962	0.197581	-1.03153
YDR420W	HKR1	0.398366	-0.000881035	0.319027	0.18476	-0.360245	0.479896
YDR421W	ARO80	0.230461	-0.308876	0.447145	-0.0108372	-0.588262	0.290731
YDR422C	SIP1	0.35479	0.0079052	0.451465	0.0139123	-2.02346	0.448173
YDR423C	CAD1	0.281044	-0.156119	-0.128048	-0.439475	-0.951944	0.0498714
YDR424C	DYN2	-0.235714	-0.157101	0.29417	-0.31426	-0.155887	0.0272084
YDR425W	SNX41	0.117923	0.595493	0.26742	-0.422513	0.550424	0.207351
YDR427W	RPN9	-0.000476058	-0.217728	-0.0237213	-0.110761	-0.477913	-0.339486
YDR430C	CYM1	-0.16364	0.206451	-0.0495912	-0.871676	-0.142982	-0.262197
YDR432W	NPL3	-0.210946	-1.27898	-0.279732	3.52854	1.71964	2.97795	yes
YDR434W	GPI17	0.555955	-0.0880846	-10.5821	0.384003	-0.274	-10.2021
YDR436W	PPZ2	-0.0878199	0.100831	0.0196288	-0.449178	-0.17181	-0.503419
YDR437W	GPI19	0.681756	0.0838681	-0.313015	0.248567	-0.177123	-1.12264
YDR439W	LRS4	-0.457054	0.73579	0.126942	-0.373796	0.789487	0.352465
YDR440W	DOT1	0.116293	-0.0204012	0.730363	0.817703	-0.0605914	0.950271
YDR441C	APT2	0.0949315	0.112629	-0.864694	-0.409456	0.487918	-2.05069
YDR443C	SSN2	-0.301136	-1.11036	-4.43239	-0.909761	-0.60249	-3.24793
YDR444W	#REF!	0.589082	-0.283257	0.0118093	0.460448	-0.364732	-0.6922
YDR447C	RPS17B	-0.710976	-0.669291	0.297033	-1.58077	-0.990722	0.000465461
YDR448W	ADA2	-0.157711	0.15517	-0.687324	-0.0790125	0.593469	-0.531498
YDR449C	UTP6	-0.41033	0.264795	0.560901	-0.760929	0.0659503	0.591002
YDR450W	RPS18A	-0.268348	0.0227201	-0.44686	-0.521379	0.307899	-1.10573
YDR451C	YHP1	0.127666	0.0305021	0.0656762	0.134705	0.574062	-0.0458788
YDR452W	PPN1	0.706411	0.338392	-0.822143	0.708162	0.76348	-1.27791
YDR453C	TSA2	-0.650058	0.230673	0.279772	-0.826352	-0.082599	0.328709
YDR454C	GUK1	0.270089	-0.72207	-0.17984	0.869122	-2.06181	0.0677489
YDR456W	NHX1	0.174202	-0.238913	-0.0342835	-0.246663	-0.554677	-0.406084
YDR457W	TOM1	-0.0846478	0.12318	-1.29797	-0.0657834	0.888154	-1.13611
YDR458C	HEH2	0.256093	0.346727	-0.434937	0.0669236	0.36683	-1.24224
YDR460W	TFB3	-0.712269	-0.449968	0.206576	0.39636	0.00563921	0.860597	yes
YDR461W	MFA1	0.548164	-0.903391	0.139812	-0.00812026	-0.637221	-0.249383
YDR462W	MRPL28	0.239716	-0.450104	-0.19183	-0.398359	-1.56877	-0.0947552
YDR463W	STP1	-0.684464	0.526998	0.778156	-0.538484	0.212403	0.775156
YDR465C	RMT2	NA	0.74175	0.301265	NA	1.02011	0.138839
YDR469W	SDC1	0.213271	0.132048	0.112738	0.346325	0.357779	-0.26108
YDR471W	RPL27B	-0.812361	-0.509222	-0.790979	-0.409201	-0.124846	-0.503419
YDR472W	TRS31	0.107294	-0.16005	-0.662087	-0.329989	0.205675	-0.561413
YDR473C	PRP3	-10.5656	0.913356	-0.0468666	-10.062	0.837706	0.174002
YDR474C	#N/A	-0.106147	0.273845	0.209021	-1.10494	0.0408512	-0.0664145
YDR476C	#REF!	0.741053	-0.691426	-0.129901	0.412674	-0.786785	-0.159097
YDR477W	SNF1	-0.498144	-0.74346	-0.758775	-0.477084	-0.407523	-0.853396
YDR478W	SNM1	0.255399	-0.359022	-0.184467	-0.113679	-0.538173	-0.447236
YDR479C	PEX29	1.26692	0.565389	-0.278361	0.982348	0.668505	-0.583738
YDR480W	DIG2	-10.6724	-10.6777	-10.6817	-10.0112	-10.2761	-10.5976
YDR481C	PHO8	0.910662	0.948922	0.412211	0.761321	1.04588	0.345735
YDR482C	CWC21	0.646117	-0.428606	-0.030626	0.644303	-0.31034	-0.270034
YDR483W	KRE2	-0.430442	0.394413	0.0972208	-2.46433	0.317267	-0.196708
YDR484W	VPS52	0.106473	0.000880497	0.247581	-0.934412	-0.182047	0.316798
YDR485C	VPS72	-0.606336	0.136062	0.0419833	-0.986088	-0.307458	0.219397
YDR486C	VPS60	0.667442	0.173988	-0.240067	0.167974	0.0009414	-0.435595
YDR487C	RIB3	0.395009	-0.259867	0.379018	0.846754	0.0378923	0.396766
YDR488C	PAC11	-0.645902	-0.386549	-0.0568822	-0.730456	-0.818744	-0.15568
YDR492W	IZH1	-1.0342	-0.103546	0.954591	-1.35469	-0.910544	0.701758
YDR493W	MZM1	0.244993	0.855063	NA	0.251971	0.544213	NA
YDR495C	VPS3	1.07703	-0.630596	-0.0468666	1.10382	-0.519568	0.462433
YDR496C	PUF6	-2.11018	0.438624	-0.829929	-2.6893	1.68894	-0.238936
YDR497C	ITR1	-0.183581	0.220882	-0.324126	-0.42064	0.0219382	-0.576607
YDR498C	SEC20	0.91218	0.736875	0.480579	0.693676	0.193586	0.543551
YDR499W	LCD1	-0.804027	0.46677	0.0929329	-1.32395	0.336917	-0.164577
YDR500C	RPL37B	-1.02137	-2.77685	-0.885638	-0.391007	-3.25376	-1.08386
YDR502C	SAM2	-0.220184	0.410406	-0.108977	1.04744	2.1572	0.855684	yes
YDR503C	LPP1	-0.426027	-0.362505	-0.0420139	-1.13427	-0.14553	-0.108046
YDR505C	PSP1	-0.804027	-0.0464018	0.187696	-0.678342	0.332437	-0.265486
YDR506C	GMC1	0.535199	-0.647053	0.428153	-0.147041	-1	0.0198804
YDR507C	GIN4	0.251645	0.490952	-0.0360192	0.135978	0.640502	-0.352034
YDR508C	GNP1	0.645093	1.45296	-0.123735	0.450694	1.46626	-0.172837
YDR510W	SMT3	-0.384713	-0.746982	-0.505505	-0.300421	-1.35726	-0.126928
YDR511W	ACN9	-0.488763	0.290205	0.0671142	-1.73562	0.230977	-0.0347057
YDR513W	GRX2	0.596117	-0.167945	-0.0101366	0.549106	0.285164	-0.368768
YDR514C	#REF!	0.582603	0.994706	0.488247	0.760262	0.811338	0.562284
YDR515W	SLF1	0.389621	-0.143417	0.244618	0.115477	-0.776279	0.540045
YDR516C	EMI2	0.793073	-0.663945	0.421376	0.511601	-0.24581	0.482625
YDR517W	GRH1	0.0724085	0.161484	0.674224	0.268383	-0.200645	0.664508
YDR519W	FPR2	0.841158	1.04889	0.0698066	0.317332	1.34695	-0.386741
YDR520C	URC2	-0.286563	0.190331	0.251275	-0.28842	-0.176777	0.244763
YDR522C	SPS2	0.238553	-0.746491	0.286681	0.27669	-0.917642	-0.0435141
YDR524C	AGE1	-0.0361476	NA	-0.0973191	-0.0634557	NA	-0.301257
YDR525W-A	SNA2	0.763658	0.572095	0.0535761	0.459554	0.541627	-0.170078
YDR527W	RBA50	0.651774	1.02377	0.290533	0.529476	0.823941	-0.146841
YDR528W	HLR1	-0.134236	0.430805	0.234202	-0.251339	0.0547925	0.271236
YDR529C	QCR7	-0.704491	-0.113294	-0.116576	-0.475206	-0.168631	-0.286244
YDR530C	APA2	-0.654186	-0.251776	-0.0198996	-1.47333	-0.381528	0.404281
YDR531W	CAB1	0.735918	-9.63979	0.549072	0.959628	-7.12177	0.599585
YDR532C	KRE28	-10.6724	-10.6777	-10.6817	-10.0112	-6.9542	-10.5976
YDR533C	HSP31	-0.373285	0.189137	-0.201681	-0.35124	0.0761179	-0.284752
YDR538W	PAD1	1.0057	-0.334871	0.467026	0.759728	-0.408773	0.556932
YDR539W	FDC1	0.374735	-0.57505	0.037161	0.258754	-0.56161	0.123182
YDR540C	IRC4	0.265684	0.0433795	-0.861499	0.0194399	-1.007	-1.37117
YEL001C	IRC22	0.438058	0.0704732	0.14169	0.515272	-0.25237	0.0444647
YEL002C	WBP1	0.841158	0.318035	0.187696	0.443765	0.464559	-0.0715533
YEL003W	GIM4	0.530478	0.0335162	0.3255	0.482918	0.05633	0.474715
YEL005C	VAB2	0.223956	0.77806	-0.0400774	-0.168745	0.920637	-0.1756
YEL006W	YEA6	-1.04594	0.121758	0.00844507	-1.19477	-0.165459	-0.351937
YEL007W	MIT1	-0.403187	-0.923831	-0.321222	1.09404	-0.960981	0.701005	yes
YEL008W	#REF!	-0.782161	0.374848	-1.17785	-1.78723	0.734404	-1.84939
YEL009C	GCN4	-0.0106472	0.227667	0.668156	-0.721208	-0.348346	0.49715
YEL011W	GLC3	0.0757675	0.221637	0.998242	-0.0775366	0.0469304	1.12437
YEL012W	UBC8	0.849666	0.407089	-0.177852	1.26082	0.706156	0.104586
YEL013W	VAC8	0.240971	-0.671126	-0.976662	-0.300495	-1.0401	-1.12531
YEL015W	EDC3	0.940233	0.661132	-0.077323	0.937249	0.648219	0.0206711
YEL016C	NPP2	-1.04988	-0.313363	0.354496	-2.16723	-0.47137	0.0493586
YEL017C-A	PMP2	-0.479442	0.195468	0.254697	-0.807018	0.28685	0.0681715
YEL017W	GTT3	-0.377805	-0.426237	-0.0315234	-2.38187	0.0770224	0.0792516
YEL018W	EAF5	-2.29879	0.0999877	-0.0275531	-1.76284	0.150967	0.628391	yes
YEL019C	MMS21	-0.210946	-0.410933	-1.47711	0.630824	-0.14813	-1.63759
YEL022W	GEA2	0.354098	0.422286	0.332343	1.76849	1.56229	1.50636
YEL027W	VMA3	0.0219325	0.438624	0.226715	-0.116409	0.562292	-0.0957499
YEL029C	BUD16	-0.356125	0.170779	-0.505326	-0.940513	-0.336837	-1.57277
YEL031W	SPF1	0.318592	-0.591306	0.489991	-0.179403	-0.564392	0.289729
YEL032W	MCM3	-0.370929	0.0519011	-0.457676	-0.651478	-0.723455	-0.995816
YEL037C	RAD23	0.387163	0.0049647	0.421376	1.97481	0.825536	2.14217
YEL038W	UTR4	-0.046925	0.324548	-0.281789	-0.292208	0.556431	-0.160465
YEL039C	CYC7	0.49106	0.353853	0.243612	0.956849	0.260364	0.394066
YEL040W	UTR2	-0.32924	-0.361438	-0.10803	-0.666931	-0.259316	-0.248859
YEL041W	YEF1	0.596813	0.92054	-0.14439	-0.188602	1.12486	-0.36292
YEL042W	GDA1	0.604347	-0.280043	0.206576	0.388134	-0.686383	0.120931
YEL043W	#REF!	0.0491317	-0.257169	0.129525	-0.00947809	-0.170749	0.290731
YEL044W	IES6	-1.04125	-0.521637	-0.74504	-0.4975	0.530425	-0.472174	yes
YEL046C	GLY1	-0.652689	-1.03431	-1.48938	4.04999	2.4239	2.25526	yes
YEL047C	FRD1	-10.5656	-10.6398	-10.5821	-10.062	-6.67431	-5.29523
YEL048C	TCA17	-0.735855	0.588425	0.12349	-0.966649	0.656009	-0.0447769
YEL050C	RML2	1.2803	0.872948	0.295909	0.824413	0.807355	-0.192295
YEL051W	VMA8	-1.29521	-0.436928	-0.234594	-2.6625	-0.808519	-0.44784
YEL052W	AFG1	0.386243	-0.264092	0.201729	0.804156	-0.330681	0.0641911
YEL053C	MAK10	0.68897	0.0586823	-0.272287	0.481627	0.271734	-0.824448
YEL054C	RPL12A	0.0146804	0.096609	-0.67075	0.23945	-0.347581	-0.702278
YEL055C	POL5	-1.25952	-0.0623641	-0.203847	-0.292208	0.0912248	0.394066
YEL058W	PCM1	-0.0285692	-0.781387	0.225213	0.110306	-0.804449	0.0792516
YEL059C-A	SOM1	0.365159	0.717759	-0.33066	0.299898	1.11054	-0.666848
YEL060C	PRB1	0.58734	-0.344024	-1.40971	0.497331	-0.631374	-2.69433
YEL061C	CIN8	0.415037	0.390387	-0.0505006	-0.06286	0.893801	-0.262197
YEL062W	NPR2	0.210982	-0.0284635	0.8355	-0.564144	-0.901085	0.43101
YEL063C	CAN1	0.870606	-0.258813	-9.68168	0.944423	-0.187336	-10.5976
YEL066W	HPA3	-0.32702	-0.000881035	-0.173883	-0.753839	-0.822854	0.140505
YEL068C	#REF!	0.074089	0.251539	-10.6817	0.121915	0.453496	-10.5976
YEL070W	DSF1	-0.301738	0.562475	-0.163024	-0.768053	-0.112475	0.366032
YEL071W	DLD3	NA	-0.041095	-10.6817	NA	0.321928	-10.5976	yes
YER001W	MNN1	0.0863705	0.827813	0.354496	-0.731129	0.877206	0.0623188
YER002W	NOP16	-0.209126	-0.0900082	-0.12271	0.653058	0.0499765	0.495713	yes
YER003C	PMI40	-2.46755	-0.486241	-0.404722	-2.38962	-0.121769	0.199822
YER004W	FMP52	-0.226376	0.172467	-0.913493	-0.464333	-0.220842	-0.984719
YER005W	YND1	-0.337962	0.198623	-1.52686	-0.507457	0.0743301	0.448928
YER006W	NUG1	0.193308	0.817636	-0.212036	1.95564	2.20315	-0.22799
YER007C-A	TMA20	-1.07251	-0.211133	0.471241	-1.92908	-0.274716	0.396059
YER007W	PAC2	-1.33196	0.185961	-0.886914	-0.940513	0.05633	-1.25668
YER008C	SEC3	0.316969	0.00439712	0.346228	-0.0599425	-0.721536	-0.206343
YER010C	#REF!	0.624246	0.420903	-0.127843	0.418744	0.133903	0.456088
YER011W	TIR1	-2.73903	-0.581801	0.184387	-3.14318	-0.455787	0.0716718
YER012W	PRE1	-0.265226	0.423602	0.0876289	-0.656905	-0.0743971	-0.00613653
YER013W	PRP22	-0.261797	-1.03061	0.0251883	-0.116602	-1.17819	-0.155
YER014W	HEM14	0.701208	0.298316	-0.802423	0.412674	0.140753	-1.53679
YER015W	FAA2	NA	-0.00588948	0.560603	NA	-0.0933605	0.2665
YER016W	BIM1	-10.6724	-10.6777	-10.6817	-10.0112	-5.88381	-10.5976
YER017C	AFG3	-10.5656	-10.6398	-10.5821	-10.062	-5.41128	-8.20212
YER018C	SPC25	0.465778	-0.354391	-0.0265942	0.376746	-1.16969	-0.220557
YER019C-A	SBH2	0.306285	-0.0750208	0.557921	0.0413408	-0.778273	0.605149
YER019W	ISC1	0.129283	-0.140501	0.0798736	-0.11187	-0.311784	0.291917
YER020W	GPA2	0.874253	-0.354391	0.112216	0.841836	-0.910544	0.0798062
YER021W	RPN3	-0.80052	-0.128898	NA	1.21939	1.50031	NA
YER022W	SRB4	0.121178	0.128024	-0.158116	0.351812	0.425182	-0.167134
YER023W	PRO3	0.819428	0.593743	0.336523	1.71286	1.17148	1.03177
YER024W	YAT2	0.526518	0.330313	0.302792	-0.0149222	0.25879	0.0564422
YER025W	GCD11	-2.72009	-1.87824	-1.70256	-3.57019	-1.42638	-2.08838
YER026C	CHO1	0.00617451	0.327433	-0.429857	-0.449178	0.0982795	-0.533239
YER027C	GAL83	0.607474	0.518186	0.312676	0.485812	0.298383	0.316529
YER029C	SMB1	-0.413293	-1.72391	-0.750835	0.575484	-1.64751	0.407055	yes
YER030W	CHZ1	-10.6724	-9.09276	-10.6817	-8.42626	-10.2761	-10.5976
YER031C	YPT31	0.700623	0.367234	0.213898	0.72504	0.306782	0.445335
YER032W	FIR1	0.340897	-0.502794	0.435965	0.509391	-1.2705	-0.196708
YER034W	#REF!	0.309142	0.414377	-0.150296	0.586825	0.916785	0.0615169	yes
YER035W	EDC2	-0.224615	-0.0996649	-1.72416	0.793601	0.0344291	-1.71831
YER036C	ARB1	-0.0195804	-0.883304	-0.644131	-0.261358	-1.16499	-0.319138
YER037W	PHM8	0.908128	-0.71498	0.302792	0.381933	-1.39385	0.424498
YER038C	KRE29	-0.378954	0.0484985	-0.440886	-0.183091	-0.0353331	-0.861185
YER039C-A	#REF!	-0.219064	0.700057	0.21633	-0.227575	0.723721	0.0314959
YER040W	GLN3	0.455569	0.285176	0.48574	0.233137	0.491232	0.313056
YER041W	YEN1	NA	-9.67772	-4.55239	NA	-10.2761	-4.51012
YER042W	MXR1	0.850692	-0.407372	0.467707	0.477113	-0.786785	0.527497
YER044C	ERG28	-0.0293309	-0.805322	0.17358	0.0736631	-1.02661	0.267518
YER047C	SAP1	-0.612837	1.08088	-0.24452	-1.01765	0.806817	-0.816261
YER048W-A	ISD11	-0.719684	0.0227201	-0.229436	-1.03109	0.101086	-0.0691329
YER049W	TPA1	-0.126496	-0.192897	0.2776	1.63443	-0.792309	0.789892	yes
YER050C	RSM18	0.0755705	0.355268	-0.391083	-0.356414	-0.0664865	-0.576415
YER051W	JHD1	0.0935258	0.0949167	0.222796	0.136399	0.15858	0.124306
YER052C	HOM3	-0.32924	-0.0936967	0.672572	0.254388	0.585738	1.25845
YER053C-A	#REF!	0.0674171	1.08002	0.31116	-0.13575	1.15181	-0.31034
YER054C	GIP2	0.707052	-0.0576509	-0.950965	1.08134	-0.172871	-0.769582
YER056C	FCY2	0.445649	0.753598	0.00469781	0.39636	0.423722	-0.229144
YER056C-A	RPL34A	-0.298473	-0.325676	0.240907	-0.818934	-0.727302	-0.032485
YER057C	HMF1	-0.603647	-0.251455	0.14169	-1.11641	-0.860383	0.248687
YER059W	PCL6	-0.18559	-2.16202	-0.391659	-1.23315	-2.72923	-0.292665
YER061C	CEM1	-0.0403389	0.10446	0.144871	-0.143949	0.854446	-0.0229935
YER062C	HOR2	0.206392	-1.01594	0.284107	0.1612	-1.05212	0.275088
YER063W	THO1	-0.749098	-0.150243	-0.493089	1.4574	1.52558	0.881688	yes
YER064C	VHR2	0.902537	-0.177291	0.0698066	1.09277	-0.61686	0.220992
YER067W	RGI1	-0.00907208	-0.117211	-0.220198	0.11288	0.141607	0.0362809
YER068W	MOT2	-0.113048	0.125604	0.0547243	-0.279908	-0.0199157	-0.145346
YER069W	ARG5,6	-0.219064	0.0718741	-0.29674	-0.584288	0.174522	0.334123
YER070W	RNR1	-1.76145	-2.85843	-1.67826	-2.04524	-1.93734	-1.20494
YER071C	TDA2	-0.429251	0.345342	0.547141	-0.78964	0.296576	0.768189
YER072W	VTC1	-0.0857979	0.173988	-0.391083	-0.187065	-0.00282789	-1.54391
YER073W	ALD5	0.768136	-0.085204	0.115694	0.785794	-0.18781	-0.00613653
YER075C	PTP3	0.768136	0.222844	-2.16429	0.0607819	-0.170749	-2.67074
YER077C	#REF!	0.586707	0.436355	0.624262	0.116619	0.475437	0.203018
YER078C	ICP55	0.619321	-0.136623	0.939916	0.735287	-0.0887723	0.656851
YER079W	#REF!	0.704243	0.298128	0.284107	0.916551	-0.141698	0.0774879
YER080W	AIM9	0.738773	0.492707	-0.570915	0.376746	0.727707	-1.39799
YER081W	SER3	-0.475209	0.518882	0.36135	-1.8413	0.319133	-0.196708
YER082C	UTP7	-0.350045	-2.82601	0.190997	-0.285613	-3.30508	0.0446168
YER084W	#REF!	-0.284408	-0.0750208	-0.25018	-1.71661	0.223721	0.00881817
YER086W	ILV1	0.307	-10.6777	-0.110873	0.0828504	-10.2761	-0.208494
YER087C-A	#REF!	-1.45705	-0.903391	-0.412217	-2.21656	-0.824644	-1.01973
YER087W	AIM10	0.467126	-0.026668	-0.588921	0.115477	-0.418143	-0.808053
YER088C	DOT6	-0.88083	-1.28444	-0.0983262	-1.57421	-1.33327	-0.284752
YER089C	PTC2	-0.175572	-0.606257	-0.349641	1.27591	-0.238577	0.800622	yes
YER090W	TRP2	-0.548304	-0.208078	-0.138646	-0.682552	-0.0740006	0.0862848
YER091C	MET6	-0.895992	0.0904647	-0.151271	0.102515	2.65202	2.66451	yes
YER092W	IES5	-1.0651	-1.35805	0.180185	-1.46433	-1.27612	1.27663	yes
YER093C-A	AIM11	-10.6724	-10.6777	-10.6817	-10.0112	-10.2761	-10.5976
YER095W	RAD51	-1.19926	-2.18858	-0.949147	-0.387854	-1.742	-0.0975251
YER098W	UBP9	0.840315	0.126411	0.916375	0.397102	0.217731	0.688971
YER099C	PRS2	NA	0.123419	-0.376349	NA	-0.246927	-0.578242
YER100W	UBC6	0.544321	0.581435	0.579242	0.00975268	-0.0353331	0.79473
YER101C	AST2	-0.658688	-0.0842451	-0.307182	-1.00405	-0.907008	-0.333301
YER102W	RPS8B	1.01185	0.00316133	-0.730393	0.795157	-0.0103961	-0.942381
YER103W	SSA4	-0.134081	0.13417	-0.380018	-0.103493	0.49695	-0.443901
YER104W	RTT105	0.0123233	0.00439712	-1.16008	0.118056	-0.321928	-1.94295
YER105C	NUP157	-3.38702	-0.436928	-0.116576	-2.93441	-0.210035	-0.42641
YER107C	GLE2	-0.749098	-1.87682	-0.429012	-0.991637	-3.1676	-0.223634
YER110C	KAP123	-0.413859	0.0467942	-0.109925	0.65322	1.65387	1.12437	yes
YER111C	SWI4	-0.4789	-0.388854	0.365446	-0.964103	-0.740849	0.471191
YER112W	LSM4	-0.36468	0.993656	-0.344932	0.221042	1.22414	-0.153637
YER113C	TMN3	-0.463602	-0.834049	0.275061	-0.608776	-0.905244	-0.183924
YER114C	BOI2	0.843813	-0.595399	0.576468	0.507809	-0.914089	0.79858
YER116C	SLX8	-0.139096	0.695689	0.541721	-0.133176	0.509328	0.403117
YER118C	SHO1	0.678191	0.236724	-0.139198	0.447729	0.14842	-0.232018
YER120W	SCS2	-0.545721	-0.614325	0.162243	-0.392842	-1.03772	0.163964
YER122C	GLO3	0.196804	-0.74346	-0.438759	-0.394935	-0.988744	-0.192295
YER123W	YCK3	-1.20803	-0.649689	-0.099334	-2.20407	-0.868674	0.135498
YER124C	DSE1	0.146949	-0.188582	0.115694	-0.0494216	-0.246927	0.354382
YER126C	NSA2	-1.27796	-1.31358	-0.473443	-1.06286	-1.90544	-0.427662
YER127W	LCP5	-10.6724	-10.6777	-10.6817	-5.7633	-5.57568	-10.5976
YER128W	VFA1	-0.204731	-0.554985	0.141519	-0.188602	-0.653423	-0.0523767
YER129W	SAK1	-0.447935	-1.38949	-0.14543	-0.380808	-1.6955	0.27361
YER131W	RPS26B	-1.08746	-0.263034	-0.16795	-2.31774	-0.623279	-0.388134
YER132C	PMD1	0.675809	0.566611	-0.638162	0.47031	-0.12793	-0.692349
YER133W	GLC7	NA	-0.00952577	-0.264729	NA	-0.466157	-0.560072	yes
YER134C	#REF!	0.930776	1.20961	-0.450285	1.22797	1.04861	-0.126645
YER136W	GDI1	-0.358409	0.355703	-0.403228	-0.828833	0.21272	-0.61602
YER139C	RTR1	-0.418373	-0.0576509	-0.384925	-0.57823	0.216461	-0.659092
YER141W	COX15	0.819206	0.523228	0.340442	0.595272	0.552584	0.399647
YER142C	MAG1	-0.482601	0.00439712	-0.460091	-0.572435	-0.357261	-0.499555
YER143W	DDI1	-0.719684	-0.590257	-0.573153	0.0682575	-0.237205	0.0390376
YER144C	UBP5	-0.244778	1.03705	0.627311	0.055597	0.782934	0.306661
YER145C	FTR1	0.428068	0.651953	-0.222392	0.122829	0.220508	0.0218779
YER147C	SCC4	-0.54877	0.0864253	0.234842	-0.398488	0.133903	0.383778
YER148W	SPT15	0.234465	0.523179	0.374283	0.389652	0.504415	0.126074
YER149C	PEA2	0.218239	0.274592	-0.607727	-1.46213	0.371541	-1.15228
YER151C	UBP3	0.566922	-0.104518	-0.0371775	0.152273	-0.586847	-0.45729
YER152C	#REF!	-0.116878	-0.4168	0.0135506	0.447179	-0.452757	0.0534647
YER153C	PET122	-0.571225	-0.0398801	0.310401	-0.722196	-0.296955	-0.108046
YER154W	OXA1	-10.6724	-10.6777	-10.6817	-9.01123	-10.2761	-6.59759
YER155C	BEM2	-0.810691	-0.818019	-1.02947	-1.33753	-1.31441	-1.44057
YER156C	#REF!	-0.130361	0.00439712	-1.08176	1.30052	1.26787	0.270464	yes
YER157W	COG3	-0.132297	0.640823	1.00088	-0.537522	0.903163	0.658622
YER158C	#REF!	-0.126496	-0.251455	0.401802	-0.649283	-0.626868	0.491863
YER159C	BUR6	-0.0294711	-0.32678	0.0308493	2.31969	0.995922	1.67533	yes
YER161C	SPT2	-0.0508641	-0.925547	-0.67826	2.93266	1.05316	2.31012	yes
YER162C	RAD4	-1.07997	-0.213174	0.00744675	-1.49947	0.0207918	-0.0305817
YER163C	GCG1	0.110573	0.249318	0.825621	0.185989	-0.0449032	1.12095
YER164W	CHD1	-0.322404	-0.474886	-0.0634888	0.910934	-0.158085	0.994478	yes
YER165W	PAB1	-1.45705	-1.54704	-1.05076	-1.61084	-2.20182	-0.666848
YER166W	DNF1	0.0874628	-0.372798	0.0135506	-1.10735	-1.18073	-0.219292
YER168C	CCA1	0.162046	0.407089	-0.129969	1.10706	1.23908	0.707335
YER169W	RPH1	-0.26622	0.145648	-0.603527	-0.0998353	0.532035	-0.959151
YER170W	ADK2	-0.331958	0.132522	0.169402	-0.0776277	-0.269452	0.207267
YER171W	RAD3	-0.529042	0.789886	0.57217	-0.0396837	1.72458	1.04672	yes
YER172C	BRR2	-0.209923	-0.0584167	-0.153224	0.590544	0.303192	0.0985111
YER173W	RAD24	-0.812361	0.0184186	-0.616358	-0.695724	-0.259272	-0.370817
YER174C	GRX4	0.307714	0.383652	0.696617	0.522102	0.250375	0.833388
YER175C	TMT1	0.348555	-0.0778068	0.491375	0.568089	0.0310764	0.272778
YER176W	ECM32	-0.601237	0.120095	0.237239	-0.985231	-0.117676	-0.196499
YER177W	BMH1	-0.614293	1.29316	-1.88866	1.18232	2.56934	0.137726	yes
YER178W	PDA1	-10.5656	-9.63979	-10.5821	-10.062	-5.88076	-5.15773
YER182W	FMP10	-0.446013	-0.365971	-0.575769	-1.54362	-0.0801371	-0.745838
YER183C	FAU1	-0.352474	0.224393	-0.293276	-0.621177	0.0581401	-0.424047
YER188W	#REF!	0.769254	-0.360182	-10.5821	0.942877	-0.467458	-10.2021
YFL001W	DEG1	0.443919	0.277204	-1.16008	1.37248	0.838269	-1.94295
YFL002C	SPB4	-0.605576	-0.353235	0.379308	-0.00540842	-0.271724	0.851123
YFL004W	VTC2	0.270472	0.0273186	-0.361764	-0.0890664	-0.406275	-0.344143
YFL006W	#N/A	0.35962	-0.433356	-0.353003	-0.537522	-0.59313	-0.341378
YFL007W	BLM10	-0.368361	0.146477	-0.809003	-0.361606	0.24137	-0.668794
YFL008W	SMC1	-0.612837	-0.520852	0.193468	1.68908	0.799802	2.3256	yes
YFL010C	WWM1	0.386435	0.42495	-0.0410454	0.424789	0.715142	0.323397
YFL013C	IES1	-0.480133	0.352947	-0.00660273	0.436889	1.33305	0.424781	yes
YFL014W	HSP12	-0.109229	0.148034	0.318322	0.827189	0.919863	1.26428	yes
YFL016C	MDJ1	0.81139	-1.09464	-0.0459595	-0.279908	-1.04731	-0.410235
YFL017C	GNA1	-0.00886724	0.404429	-0.259613	0.474602	0.515852	0.00881817
YFL017W-A	SMX2	-0.680903	0.612875	0.2776	0.373556	1.74347	0.404525	yes
YFL018C	LPD1	0.388946	-0.394631	-1.01634	-0.205483	-1.29598	-1.12185
YFL021W	GAT1	-0.549597	-0.333424	1.03899	-0.557957	-1.04731	0.745043
YFL023W	BUD27	-0.322404	0.836953	0.426287	-0.334126	0.512877	-0.295233
YFL024C	EPL1	-0.185117	0.105881	0.0689097	-0.554251	0.202616	0.124306
YFL025C	BST1	0.370602	-0.15122	0.428806	0.4441	-0.0128552	0.341992
YFL026W	STE2	-0.0669458	-1.31578	-0.472224	-0.448985	-1.2705	-0.61602
YFL027C	GYP8	-10.6724	-10.6777	-10.6817	-10.0112	-4.32193	-10.5976
YFL028C	CAF16	0.405725	0.0578364	0.257902	0.362725	0.117266	0.435147
YFL029C	CAK1	-2.19669	-1.14244	-1.01457	-3.05703	-1.00934	-0.689194
YFL030W	AGX1	0.131706	0.0365259	0.0656762	-0.122484	0.173024	-0.218209
YFL031W	HAC1	-0.276891	0.460552	0.25496	-0.142405	1.20719	1.39039
YFL033C	RIM15	-0.879078	-1.4774	-0.252346	-1.47333	-1.70776	-0.978122
YFL034C-A	RPL22B	-0.657186	0.644453	0.677013	-0.456567	0.661973	0.692694
YFL034C-B	MOB2	0.152955	0.0112588	-0.043953	-0.788251	-0.181389	-0.598497
YFL034W	#REF!	-10.6724	-10.6777	-10.6817	-6.20387	-4.78427	-5.07403
YFL041W	FET5	-0.854772	0.782798	0.277393	-1.40027	0.293781	0.179419
YFL044C	OTU1	-0.75804	0.365991	0.353121	-0.0425605	0.183307	0.397473
YFL045C	SEC53	-10.6724	-10.6777	-10.6817	-10.0112	-5.63227	-10.5976
YFL046W	FMP32	-0.491437	-0.21248	0.469067	-0.79526	-0.067473	0.211504
YFL047W	RGD2	0.0140752	0.409743	0.63517	-0.183091	0.581079	-0.0267826
YFL048C	EMP47	-0.866873	-0.622985	-0.077323	-1.35124	-0.58261	0.070506
YFL049W	SWP82	0.327575	0.325095	-0.173883	-0.42064	0.727394	-0.441504
YFL050C	ALR2	1.11829	0.458897	0.00844507	0.779518	0.267422	-0.505156
YFL053W	DAK2	0.266521	-0.761742	0.0671142	-0.818872	-0.640153	-0.435595
YFL060C	SNO3	-0.0467165	0.669902	0.442444	-0.991637	0.873623	0.32574
YFL062W	COS4	-0.594035	-0.520852	-0.163235	0.30646	-0.785161	-0.757109
YFR001W	LOC1	-0.814034	-0.283341	0.311918	-1.03138	-0.387675	0.521537
YFR002W	NIC96	0.506554	-0.204123	0.414332	0.27446	-0.0783688	-0.129321
YFR003C	YPI1	-0.269809	0.214296	-0.0275531	0.0620752	0.0426809	0.0242884
YFR004W	RPN11	-0.543142	-0.331206	-0.220198	0.751985	1.48001	0.850013	yes
YFR005C	SAD1	0.614132	0.499077	-0.207972	0.687477	0.991833	-0.0526226
YFR007W	YFH7	-0.0361476	0.436355	0.32925	-0.548319	0.679719	-0.125308
YFR008W	FAR7	-0.841064	0.914316	-0.178065	-1.39316	0.756421	-1.65138
YFR009W	GCN20	0.0114465	-0.985976	-1.92013	-0.167306	-2.14684	-1.80317
YFR010W	UBP6	-2.64671	-2.43034	-1.56255	-0.665441	-2.04593	-0.581904
YFR011C	AIM13	NA	-0.755622	0.144076	NA	-1.81302	0.223092
YFR013W	IOC3	-0.58099	-0.556186	-0.282934	-0.243043	-0.0900102	0.164795	yes
YFR014C	CMK1	0.675213	1.12508	0.483274	0.950578	0.98818	0.503509
YFR015C	GSY1	0.703157	0.100357	0.796081	0.88964	-0.126377	0.870528
YFR016C	#REF!	0.236938	0.668546	-1.6603	-0.574206	0.672647	-1.92135
YFR017C	IGD1	-0.596911	-0.837277	0.275839	-1.13131	-0.921205	0.0658333
YFR018C	#REF!	-0.212994	0.322985	0.614665	-0.772823	-0.153296	0.508321
YFR019W	FAB1	-0.260914	-0.209096	0.579242	-0.799339	-0.241325	0.737803
YFR021W	ATG18	-0.135126	-1.0068	0.338211	-1.35469	-1.20399	0.0158339
YFR024C	#N/A	0.79472	0.603381	0.238037	0.716852	0.34064	-0.372401
YFR024C-A	LSB3	0.270822	-0.235813	0.214655	-0.16417	-0.066671	0.207351
YFR025C	HIS2	0.0614374	0.505916	-3.65931	-0.0908744	0.181256	-5.20527
YFR026C	ULI1	0.0114465	0.399764	0.0274062	0.228371	0.471229	-0.123881
YFR028C	CDC14	-1.27582	-0.128898	-0.144459	-3.22987	-1.18073	-0.0353446
YFR030W	MET10	0.602535	0.154379	-0.254365	0.408733	0.280382	-0.914592
YFR031C	SMC2	0.0683253	-0.268016	0.31116	0.0529975	-0.162294	0.633137
YFR031C-A	RPL2A	-0.968522	-0.0759489	-1.25541	-0.533469	0.277505	-1.72722
YFR032C-A	RPL29	-0.285485	-0.300509	-0.112772	1.36869	0.737896	0.644992	yes
YFR033C	QCR6	0.616816	0.110914	-0.273803	0.74047	0.162792	-0.45561
YFR036W	CDC26	0.509901	0.343201	0.0279601	0.492543	-0.138257	0.278666
YFR037C	RSC8	0.0245422	-0.298341	-0.294737	1.79532	1.11243	1.2479	yes
YFR039C	OSW7	-0.682321	0.0754971	-1.08549	-0.921115	-0.239951	-1.73961
YFR040W	SAP155	0.0165638	0.902272	-0.236737	-0.515152	0.705357	-0.605934
YFR043C	IRC6	0.0259442	-0.407372	0.18107	-0.180932	-0.368096	0.257308
YFR044C	DUG1	1.13962	0.868992	0.577729	2.19151	1.30259	1.35342
YFR046C	CNN1	0.277401	-0.573121	0.25275	-0.389175	-1.52458	0.201695
YFR047C	BNA6	0.532757	0.0970674	0.286269	0.751985	0.175087	0.637829
YFR048W	RMD8	-0.256102	0.230572	0.59091	-0.580247	0.0112565	0.582511
YFR049W	YMR31	0.533112	0.00586554	-0.228995	0.218725	-0.0833487	-1.07542
YFR050C	PRE4	-1.24407	-0.581004	-1.49433	-0.0411214	0.443264	-0.0720662
YFR051C	RET2	-0.450534	0.358092	-0.316527	-1.30049	0.048156	-1.62469
YFR052W	RPN12	-1.32149	-0.134688	0.634038	-2.4338	1.43296	1.72828	yes
YFR053C	HXK1	-0.265158	-0.816633	0.263766	0.544321	-0.388904	0.752247
YFR054C	#REF!	0.647526	0.570878	-0.0595605	0.393281	0.524053	-0.129321
YFR055W	IRC7	0.383535	-0.816633	-0.357497	0.538557	-0.847764	0.102853
YGL001C	ERG26	-0.640766	-2.29106	-1.58779	-0.833227	-1.6955	-1.58741
YGL004C	RPN14	0.149526	0.134994	0.016841	-0.310502	-0.172871	-0.290732
YGL005C	COG7	-0.588298	-0.338297	-0.11964	-0.95091	-0.972022	-0.327142
YGL006W	PMC1	0.872174	0.651378	0.412918	0.334559	0.19441	0.261401
YGL008C	PMA1	0.217839	-0.40509	0.418328	0.0615753	0.182282	0.333889
YGL009C	LEU1	-0.420943	0.149623	0.33304	2.60463	2.69506	2.79554	yes
YGL010W	#REF!	0.157297	-0.0501858	0.695533	0.385378	0.587288	0.699329
YGL011C	SCL1	NA	0.869175	0.0698664	NA	1.01447	-0.104732
YGL012W	ERG4	-3.49252	-1.98075	-1.68732	-4.05703	-1.59313	-2.09376
YGL013C	PDR1	-1.12679	0.389494	-0.0170399	-1.62325	0.562183	-0.702278
YGL014W	PUF4	-10.5656	-0.835662	0.0187001	-10.062	-0.875568	0.305671
YGL016W	KAP122	0.881505	0.462183	0.346376	0.779518	-0.0963777	0.134383
YGL017W	ATE1	0.507224	0.331032	-0.072367	0.521977	0.467967	-0.101461
YGL018C	JAC1	0.651168	1.08088	0.624262	-0.00540842	0.760874	0.200888
YGL019W	CKB1	0.892828	0.39363	0.478554	1.64747	0.823941	0.656634
YGL020C	GET1	-0.114367	0.554964	0.0617142	-0.566191	0.365706	0.0809645
YGL021W	ALK1	0.516781	0.408417	0.500096	-0.290128	-0.250985	0.336104
YGL022W	STT3	0.730765	0.826793	-0.17913	-0.0977053	0.841915	-0.609667
YGL025C	PGD1	0.120047	-2.23891	-0.106409	0.353696	-1.68638	0.220992
YGL026C	TRP5	0.21332	0.557424	0.206576	0.571857	0.787306	0.626013
YGL027C	CWH41	-0.251412	-0.870365	-0.321928	-0.00419999	-2.00466	-0.59056
YGL028C	SCW11	0.218239	-0.588584	-0.434937	-0.224418	-0.875568	-0.643703
YGL029W	CGR1	-0.0109893	-0.814834	-0.44387	1.68866	-0.543654	0.557764	yes
YGL030W	RPL30	-9.67243	-10.6777	-10.6817	-7.42626	-5.88381	-10.5976
YGL031C	RPL24A	-1.33035	-0.706176	-0.138646	-1.95053	-1.46877	-0.245544
YGL032C	AGA2	0.842752	-1.53127	0.114826	0.78266	-1.70162	0.135498
YGL035C	MIG1	-0.95271	-0.214577	0.0307265	-0.484617	-0.0983926	0.748432
YGL036W	#REF!	0.937254	1.31549	-0.40099	0.905901	0.863814	-0.535012
YGL037C	PNC1	-0.147884	0.224655	-0.254365	-0.454721	0.479598	-0.368768
YGL038C	OCH1	0.588494	0.23816	0.385757	0.311828	0.305076	0.200885
YGL039W	#REF!	-10.5656	-10.6398	-10.5821	-10.062	-4.74831	-7.8802
YGL040C	HEM2	0.22314	-0.850259	0.350811	0.835799	-0.254771	1.34477
YGL043W	DST1	-1.6668	-0.185867	-0.45647	-1.39652	1.14489	0.480564	yes
YGL044C	RNA15	-0.919209	-0.210114	-0.863095	1.58263	2.97964	2.01436	yes
YGL045W	RIM8	0.677001	0.548796	0.41997	0.420762	0.172852	0.359164
YGL046W	#N/A	0.296961	-3.20199	-10.6817	0.315202	-0.496405	-10.5976
YGL047W	ALG13	-0.254965	-0.451204	-0.198438	-0.261146	-0.519154	0.055264
YGL048C	RPT6	0.145358	-10.6777	0.239419	0.289125	-10.2761	0.30177
YGL049C	TIF4632	-0.146671	-0.176269	-0.207103	-0.977238	0.0644579	-0.41259
YGL050W	TYW3	-1.15619	-1.36134	-0.41347	-1.94311	-1.49109	-0.0422525
YGL053W	PRM8	-0.536716	0.293824	0.623244	-0.953236	0.413874	0.541325
YGL054C	ERV14	-1	-1.36257	-0.467359	-0.975054	-3.21004	-0.450382
YGL055W	OLE1	-2.41076	0.254267	0.0224112	-1.24826	0.533843	0.239783
YGL056C	SDS23	0.279128	0.76162	-0.0170399	1.45119	1.52373	0.907707	yes
YGL057C	GEP7	-0.470181	0.564167	0.153414	-1.85259	0.580561	-0.204944
YGL058W	RAD6	-0.245112	-0.410933	-0.222246	-0.892286	-1.60724	-0.608902
YGL059W	PKP2	0.402385	0.359827	0.5927	-0.186269	0.199609	0.35151
YGL060W	YBP2	0.268622	-0.176878	0.119222	-0.131644	-0.218133	0.236094
YGL061C	DUO1	0.923266	0.972154	0.204944	0.995269	0.398939	-0.0612941
YGL062W	PYC1	0.216601	-0.56699	-0.67826	0.688661	-0.321457	-0.0612941
YGL064C	MRH4	-10.6724	-6.59026	-10.6817	-10.0112	-5.1062	-10.5976
YGL065C	ALG2	0.632253	0.96012	0.151721	0.586311	0.952129	0.325353
YGL066W	SGF73	0.17698	-0.0356679	-0.302299	0.240255	0.011588	-0.029631
YGL067W	NPY1	-10.6724	-10.6777	-10.6817	-8.01123	-6.9542	-10.5976
YGL068W	MNP1	0.549766	-0.150243	0.132905	0.807355	0.197581	0.475885
YGL070C	RPB9	-0.452047	-1.72643	0.346919	0.725175	-0.648591	1.21298	yes
YGL071W	AFT1	-2.34158	-0.159003	0.291302	-3.41819	-0.0420418	-0.302767
YGL076C	RPL7A	-5.65869	-1.54176	-0.423532	-5.25469	-1.31207	-0.708268
YGL077C	HNM1	-1.17457	-0.232705	0.112738	-4.88194	0.105419	-0.057459
YGL078C	DBP3	0.0280144	-0.386549	0.17708	1.77177	0.861507	1.05884	yes
YGL079W	KXD1	NA	-0.254604	0.0815347	NA	-0.355772	0.0993805
YGL080W	FMP37	-0.566517	0.535385	NA	-1.51937	0.66272	NA
YGL082W	#REF!	-0.147726	-0.46362	-0.162182	0.287788	0.329442	0.348623
YGL083W	SCY1	-0.226376	-0.122172	0.120839	-0.777608	-0.433774	-0.0154451
YGL084C	GUP1	-0.745399	0.331751	0.572676	-1.15516	0.203434	0.56854
YGL085W	LCL3	0.657371	1.0022	0.593865	0.56242	1.00407	-0.00326244
YGL086W	MAD1	-2.05383	0.985459	0.158482	-1.55425	0.905132	-0.160465
YGL087C	MMS2	0.00237794	-0.0306142	1	0.419753	-0.0160985	1.31505
YGL090W	LIF1	-0.349371	-0.159066	-0.519286	-0.644905	-0.708168	-0.510124
YGL092W	NUP145	0.286171	-0.710534	-0.146472	0.469335	-0.94639	0.0774868
YGL094C	PAN2	0.406393	0.93653	0.482601	0.301656	0.933938	-0.224722
YGL095C	VPS45	0.898968	0.191514	-0.230099	0.836555	0.0187123	0.00976447
YGL097W	SRM1	-0.330761	-0.516965	0.0344069	2.774	1.97865	3.58955	yes
YGL098W	USE1	-1.72953	-0.906778	-0.11964	-1.9799	-1.29811	-0.00122522
YGL099W	LSG1	-0.953037	0.459271	-0.667657	-1.6848	-0.158481	-1.14844
YGL100W	SEH1	-1.07065	-0.289702	-0.893775	-1.72583	-0.378279	-0.971878
YGL101W	#REF!	0.0500515	0.07874	-0.594878	0.153487	0.434911	-0.831436
YGL105W	ARC1	-1.21299	-0.886557	-1.03782	-1.72583	-0.814645	-1.31218
YGL107C	RMD9	0.739344	0.302722	0.058103	0.401478	-0.0218235	-0.253757
YGL108C	#REF!	0.0866306	-0.445299	-0.495563	0.121915	-2.03295	-0.857806
YGL110C	CUE3	-0.117836	-0.760348	0.0248184	-0.529428	-0.711975	0.0106678
YGL111W	NSA1	-0.446013	-0.4441	-1.03602	-1.46048	-0.134017	-1.11983
YGL112C	TAF6	-0.13715	0.0586823	-1.01634	0.515272	0.349584	-0.14226	yes
YGL113W	SLD3	-1.3807	-0.79117	0.0946966	-1.6191	-1.1136	0.275634
YGL115W	SNF4	-10.6724	-10.6777	-10.6817	-8.42626	-4.41814	-10.5976
YGL117W	#REF!	0.674088	-0.121214	-0.132856	0.647877	-0.429067	-0.136108
YGL119W	COQ8	-0.111137	-0.206044	-0.399748	-2.33175	-0.223556	-1.03153
YGL120C	PRP43	-1.63077	-0.581004	-0.344056	-2.41877	-0.85406	0.475885
YGL122C	NAB2	-0.2963	0.370767	-1.25123	1.51429	1.84767	-0.514108	yes
YGL124C	MON1	0.626715	0.40255	-0.231203	0.102861	0.00751405	-0.0110646
YGL125W	MET13	0.55037	-0.0159415	-0.316449	0.761912	0.011588	-0.2269
YGL126W	SCS3	0.120365	0.226915	0.506911	0.250868	0.201634	-0.243338
YGL127C	SOH1	-0.333157	-1.7541	-0.809003	-0.0424554	-1.60679	-0.00367878	yes
YGL128C	CWC23	0.49106	0.261828	0.105234	0.0762257	0.0527028	0.0658333
YGL129C	RSM23	-0.440004	0.609993	0.0790423	-2.12248	0.386544	0.0695245
YGL130W	CEG1	-10.5656	-10.6398	-10.5821	-7.74012	-5.82631	-10.2021
YGL131C	SNT2	-1.1469	-0.651196	-0.548535	-3.39652	-0.916375	-0.257737
YGL133W	ITC1	-1.02642	0.186756	0.297441	-0.031379	0.700729	1.02369	yes
YGL134W	PCL10	0.656613	0.1042	-0.340159	0.438796	0.302206	0.24082
YGL135W	RPL1B	0.0997578	0.173187	-0.147514	2.46078	1.68909	1.7488	yes
YGL137W	SEC27	-0.270957	-0.610506	-0.104384	-0.755984	-0.557446	-0.342589
YGL140C	#REF!	-0.807355	0.60219	0.452657	-1.61084	0.54937	0.224141
YGL141W	HUL5	-0.526659	-0.886576	-0.160077	-0.899655	-0.58261	0.154328
YGL143C	MRF1	0.12878	0.486266	-0.916806	-0.852593	0.592477	-0.886974
YGL144C	ROG1	0.395009	-0.445299	0.39447	0.0041878	-0.354283	0.440646
YGL145W	TIP20	-1.00525	0.035282	-0.417235	-1.86237	0.0644579	-0.383542
YGL147C	RPL9A	-0.198163	-1.32464	-1.29212	-0.134268	-1.48054	-0.692349
YGL148W	ARO2	0.277401	0.726357	0.0538784	1.1866	1.60231	0.613693	yes
YGL150C	INO80	-0.863405	-1.08329	-0.0783162	0.586311	-0.0218235	0.747703
YGL151W	NUT1	-0.119529	-0.14794	0.230837	0.482918	0.188637	0.289729
YGL153W	PEX14	-0.160437	0.0675662	0.179409	-0.207178	-0.0833487	0.471185
YGL154C	LYS5	0.685904	0.530758	0.0805264	0.236016	0.34287	-0.0975251
YGL155W	CDC43	0.704133	0.267098	0.431878	0.605065	-0.10041	-0.00736697
YGL156W	AMS1	0.951599	0.795356	-0.271529	0.627078	0.719724	-0.200716
YGL157W	ARI1	0.410389	-0.294015	-0.200887	0.397102	-0.354283	-0.253291
YGL159W	#REF!	0.12442	0.246666	0.106108	-0.0466311	0.0912248	-0.21202
YGL161C	YIP5	-0.506262	0.444461	-0.365396	-1.72121	0.951492	-0.995816
YGL162W	SUT1	0.11917	0.892563	0.50333	-0.0676927	1.0996	0.953959
YGL163C	RAD54	-0.771559	0.488443	-0.0623747	-1.62321	0.222725	-0.26555
YGL164C	YRB30	0.113027	-0.0529242	0.163028	-0.400202	-0.558448	-0.399142
YGL166W	CUP2	0.0137378	-0.274564	0.0955777	0.47905	-0.341602	-0.16595
YGL167C	PMR1	0.478816	0.0864253	0.464982	0.299898	0.095638	0.364882
YGL169W	SUA5	-1.82694	-1.1289	-0.690156	-1.04256	-0.539722	-0.593367
YGL172W	NUP49	-0.235714	-1.20401	0.2461	0.00836347	-2.25376	-0.0211027
YGL173C	XRN1	-0.464191	0.45799	NA	-0.768053	0.4095	NA
YGL175C	SAE2	-0.25383	-0.0306142	0.224408	0.190619	-0.606786	0.0458037
YGL178W	MPT5	-0.634841	0.672523	-0.126815	-0.469589	0.784028	-0.0435141
YGL180W	ATG1	0.288301	-0.242049	0.114362	-0.0614005	-1.29598	-0.238936
YGL181W	GTS1	0.0366585	-0.552306	-0.0423369	0.204306	-0.864613	-0.135085
YGL184C	STR3	-0.956399	-0.20934	0.176914	-1.4884	-0.255895	0.0398593
YGL185C	#REF!	0.184778	-0.421511	-0.277601	-0.0154601	-0.752562	-0.603234
YGL187C	COX4	-0.588298	0.690003	0.143224	-1.76743	0.32569	-0.0676975
YGL189C	RPS26A	-0.375509	-0.311397	-0.0967152	-0.0908744	0.23464	0.267373
YGL190C	CDC55	-0.698299	0.956397	0.209021	-1.46213	1.18988	0.455195
YGL194C	HOS2	-0.602682	-0.621593	-0.452859	-0.447336	-0.565786	-0.0935994
YGL195W	GCN1	0.176731	-1.19892	0.18273	-0.303823	-1.55329	0.059971
YGL197W	MDS3	0.0149503	0.73855	-0.0605415	0.0152962	0.991833	0.338315
YGL200C	EMP24	0.432307	0.928638	0.475173	0.0620752	0.632511	0.649625
YGL201C	MCM6	0.550766	-1.07564	0.309642	3.26705	0.788397	2.74039	yes
YGL202W	ARO8	0	-0.153178	-0.301217	0.139789	-0.993036	-0.684698	yes
YGL203C	KEX1	-0.794374	0.125604	-0.252271	-1.45664	-0.277534	-0.85612
YGL206C	CHC1	-2.20075	-0.166955	-0.300135	-4.48767	0.186378	-0.741162
YGL207W	SPT16	-0.16265	0.477098	0.530211	4.78161	5.117	5.03242
YGL208W	SIP2	0.314128	-0.0556678	0.402466	0.432752	0.202645	0.57609
YGL209W	MIG2	-0.390495	0.00351877	-0.718782	-0.183091	0.465343	-1.44784
YGL210W	YPT32	-3.76553	-0.653965	-0.349641	-5.31079	-0.436921	-0.0632842	yes
YGL211W	NCS6	-1.00887	0.020985	-0.42783	-0.202263	0	-1.00326
YGL212W	VAM7	-0.193801	-0.224051	-0.713319	0.160749	-0.00944794	-0.437252	yes
YGL213C	SKI8	-0.460979	-0.340585	0.200856	-0.767425	-0.133084	-0.39638
YGL216W	KIP3	-0.109229	-0.669291	0.150421	0.269544	-1.19132	0.0597314
YGL219C	MDM34	0.0881626	0.468078	0.0187001	0.100345	0.557071	-0.0347057
YGL220W	FRA2	-0.138265	0.731439	-0.0294729	-0.138719	1.07209	0.593104
YGL221C	NIF3	0.415989	0.0040633	-0.245635	0.371539	-0.176059	0.106215
YGL223C	COG1	0.363061	0.692423	1.00832	-1.21681	-0.116253	1.02584
YGL225W	VRG4	-2.03943	0.233672	1.12527	-2.61891	-0.820797	0.916141
YGL226C-A	OST5	0.310171	0.357387	-0.682785	0.200049	0.420208	-0.85561
YGL226W	MTC3	0.933769	0.823731	0.699209	0.104117	0.601814	0.153227
YGL227W	VID30	-9.08746	-10.6777	-10.6817	-6.8413	-10.2761	-10.5976
YGL228W	SHE10	0.645093	0.088978	-0.138162	0.656487	0.114898	-0.31186
YGL229C	SAP4	0.591137	-0.140944	-0.121686	0.224512	-0.0994012	-0.736557
YGL231C	EMC4	-0.169594	0.0192479	-0.472224	0.135978	0.256232	-1.12795
YGL232W	TAN1	0.299837	-0.569195	0.500096	0.74366	-0.174149	0.71643	yes
YGL233W	SEC15	0.499838	-0.252853	0.084082	-0.177876	-0.528633	-0.358203
YGL234W	ADE5,7	-0.376656	-0.368243	-0.67045	0.295974	0.536855	0.256502	yes
YGL237C	HAP2	-0.0874628	-0.179868	-0.127089	0.436889	-0.215428	-0.587758
YGL238W	CSE1	0.139752	0.378241	-0.523068	1.14359	0.917401	-0.536891	yes
YGL240W	DOC1	-0.737442	-0.10549	-0.497334	-0.807018	-0.149703	-0.692349
YGL241W	KAP114	0.754094	0.596819	-0.440035	0.45759	0.930058	-0.122639
YGL244W	RTF1	-1.67076	-0.610506	-0.365396	1.26157	1.57646	2.44713	yes
YGL245W	GUS1	-1.07437	-0.494084	-0.105193	-2.45664	-0.117515	-0.289248
YGL246C	RAI1	0.497143	0.242086	-0.360555	-0.232323	-0.0635312	-0.771671
YGL247W	BRR6	0.680569	0.60219	0.195113	0.46836	0.790576	-0.331759
YGL248W	PDE1	-0.102054	-0.36833	0.255486	-0.230739	-0.672808	0.406131
YGL250W	RMR1	-0.18861	NA	-0.450456	0.197007	NA	-0.572447
YGL252C	RTG2	-0.977197	-0.00794875	0.381717	-1.70745	0.351409	0.746709
YGL253W	HXK2	-0.323697	-0.0177237	0.297748	2.689	2.50646	2.1504	yes
YGL254W	FZF1	0.868007	0.568441	-1.75242	1.24288	0.818611	-1.31034
YGL255W	ZRT1	0.477957	0.114257	-0.213054	0.235513	0.550424	-0.277915
YGL256W	ADH4	0.650561	-0.236781	0.115694	0.459554	-0.493738	-0.0184884
YGL257C	MNT2	0.422396	0.538249	0.384363	0.0685244	-0.0227799	0.2665
YGR001C	#REF!	-0.148863	-0.0871326	-0.123257	0.12063	0.229687	0.0516691
YGR002C	SWC4	-0.761447	-1.84538	-0.12271	-0.287259	-1.72011	0.247025	yes
YGR003W	CUL3	0.179324	-0.549725	0.0359988	-0.0701796	-0.215428	0.068637
YGR004W	PEX31	0.476051	-0.340098	0.0815347	0.323046	-0.698696	-0.44784
YGR005C	TFG2	0.0583034	-0.554985	-0.694921	0.318415	-0.69398	-1.28028
YGR007W	ECT1	0.468533	-0.170151	0.17191	0.591695	-0.0556798	0.437217
YGR008C	STF2	-0.0330846	0.369404	-10.6817	0.950946	1.11351	-10.5976	yes
YGR010W	NMA2	-10.6724	-9.09276	-10.6817	-10.0112	-3.63227	-10.5976
YGR012W	#REF!	0.422312	0.39776	-0.820591	0.765206	0.618693	-2.02773
YGR013W	SNU71	-0.873835	0.287985	-0.310679	0.0800609	0.616016	0.67516	yes
YGR014W	MSB2	0.682926	0.334206	-0.730393	0.684871	0.0253718	-1.72722
YGR016W	#REF!	-0.389405	-0.734406	-0.493354	-0.329031	-0.761022	-0.846773
YGR017W	#REF!	0.11221	NA	-0.0957762	0.389652	NA	0.242404
YGR019W	UGA1	-0.904241	-0.368243	0.605458	-0.8388	-0.560162	0.768189
YGR020C	VMA7	0.392975	0.412096	0.0680122	0.0775052	0.345095	-0.15773
YGR021W	#REF!	-0.627469	0.18437	0.226822	-0.940513	-0.276279	-0.0485718
YGR023W	MTL1	-0.0100304	-0.037094	-0.054665	-0.317212	-0.00755339	-0.438911
YGR024C	THG1	0.642158	-0.363703	0.908909	0.785624	-0.843583	0.591002
YGR026W	#REF!	0.00617451	0.332469	-0.672249	-1.0122	0.118372	-0.526167
YGR027C	RPS25A	-0.533532	-0.426689	0.13382	-1.72666	-0.930149	-0.875694
YGR028W	MSP1	0.43871	0.59491	-0.186822	0.187218	0.421712	-0.17868
YGR030C	POP6	0.320513	-10.6777	0.216168	0.939329	-10.2761	0.402413	yes
YGR031W	IMO32	0.0193182	0.422943	0.289147	-0.165737	0.413874	-0.119829
YGR032W	GSC2	0.024073	-0.236781	-1.04298	-0.501713	-0.442929	-1.22198
YGR033C	TIM21	0.399037	0.214064	-0.066048	-0.228229	0.108659	-0.284704
YGR034W	RPL26B	0.538365	0.0855734	-0.972963	0.125306	-0.342796	-1.6983
YGR036C	CAX4	-0.415831	0.778587	0.483947	-1.11076	0.71342	0.424498
YGR037C	ACB1	-0.065095	-1.00706	0.304164	0.795322	-1.03295	0.313805
YGR038W	ORM1	1.3334	NA	0.503994	0.564576	NA	0.561918
YGR040W	KSS1	-0.188368	0.762153	0.619982	-0.932763	1.0381	0.811897
YGR041W	BUD9	-0.607025	1.09703	0.655665	-0.842878	0.932527	0.553598
YGR042W	#REF!	-0.19872	0.290227	0.627799	-0.527411	-0.0593785	0.709614
YGR043C	NQM1	0.568848	1.15908	0.59216	0.632312	1.03443	0.512122
YGR046W	TAM41	0.677409	NA	0.183282	0.225983	NA	-0.0107473
YGR047C	TFC4	-0.567827	-1.58496	-1.51929	-0.765675	-1.89675	-1.52077
YGR048W	UFD1	-0.378954	NA	0.387772	-0.26976	NA	0.845356	yes
YGR049W	SCM4	-0.914526	-0.827616	-0.0943019	-1.66544	-1.27286	-0.199309
YGR052W	FMP48	-1.11784	-0.146338	-1.76879	-1.56002	-0.255144	-1.83604
YGR055W	MUP1	-0.647286	-0.460974	-0.913493	-1.77282	-0.575685	-1.16713
YGR056W	RSC1	0.184	0.27793	0.017027	1.09075	0.0230836	0.637829	yes
YGR057C	LST7	-0.160673	-0.0871326	-1.03242	-0.430027	-1.5482	-1.12795
YGR058W	PEF1	-0.104099	0.464806	-0.197358	-0.560209	0.38314	-0.105409
YGR060W	ERG25	-0.170044	-0.0464018	-0.202764	0.181128	-0.140331	-0.168701
YGR061C	ADE6	-0.900242	-0.0177411	-0.271529	1.48485	1.80762	1.83508	yes
YGR062C	COX18	0.0881626	-1.17219	0.0251883	-1.21342	-1.19318	0.0890469
YGR063C	SPT4	-0.35369	-0.477402	-0.426059	6.07322	5.01828	5.90477	yes
YGR065C	VHT1	0.713437	0.190331	-0.052321	0.769313	-0.137853	-0.314499
YGR068C	ART5	1.07692	0.289466	0.395853	0.471284	0.294549	0.0611454
YGR071C	ENV11	-0.31528	-1.04547	0.162692	0.192982	-0.912316	0.407978
YGR072W	UPF3	-1.93258	0.0432017	-0.169572	-3.11953	0.287622	-0.261076
YGR074W	SMD1	0.329686	0.603631	0.436615	0.347424	1.34913	1.17802	yes
YGR075C	PRP38	-0.52014	-0.041095	-0.437314	0.401343	0.412126	-0.286974
YGR076C	MRPL25	0.779273	0.94329	-0.17913	0.23487	0.769739	-0.668794
YGR077C	PEX8	-0.0697231	-0.474886	-0.317699	-0.490293	-0.491088	-0.796982
YGR078C	PAC10	0.105652	0.311675	-10.6817	0.372477	0.345927	-10.5976
YGR080W	TWF1	0.622195	0.828588	0.925653	0.869887	1.19961	1.33905	yes
YGR081C	SLX9	-0.676835	-0.432779	-0.547343	0.36107	-0.0903497	0.18697
YGR082W	TOM20	0.154123	-0.249359	0.66705	-0.329989	0.284208	0.143037
YGR083C	GCD2	0.616816	-1.63136	0.598389	0.355806	-2.27742	-0.1756
YGR084C	MRP13	0.384249	0.130045	0.00657265	-0.123937	0.359847	-0.183924
YGR085C	RPL11B	-1.13931	0.199411	0.128664	-1.44734	-0.0246945	0.128793
YGR086C	PIL1	0.874951	0.621488	-0.174874	0.827977	0.581079	-0.803171
YGR087C	PDC6	0.88743	0.99956	-0.0405291	0.988068	0.859585	-0.350846
YGR088W	CTT1	0.306327	0.506776	-0.417235	-0.471459	-0.283138	-0.266959
YGR089W	NNF2	0.707635	0.497839	0.206576	0.578199	0.541627	0.0740006
YGR090W	UTP22	-0.515078	-0.757367	-0.357497	-1.88711	-1.39043	0.000465461	yes
YGR091W	PRP31	0.360998	-0.0347654	-0.671849	0.796128	-0.818744	-0.435196
YGR092W	DBF2	0.482227	0.821687	-0.292123	0.0685244	0.82766	-0.594794
YGR093W	#REF!	-1.46755	0.989564	0.17191	-1.26763	1.70073	1.01583
YGR094W	VAS1	-0.160437	-0.00498184	NA	-0.300495	0.269768	NA
YGR095C	RRP46	-0.377805	-0.390007	-0.44686	-0.772823	-0.52961	-0.816227
YGR097W	ASK10	-0.217098	0.571394	-0.162041	-1.09535	0.826507	-0.386916
YGR098C	ESP1	-0.148863	0.0937698	0.486994	-0.372791	-0.066671	0.367476
YGR099W	TEL2	-0.377805	0.262594	-1.36653	-0.392842	0.170959	-1.48645
YGR100W	MDR1	0.51923	0.661132	0.240429	0.416723	0.186156	0.120931
YGR101W	PCP1	0.728454	0.270648	0.6363	0.476613	-0.393481	0.43239
YGR102C	GTF1	0.0203233	0.427641	0.343412	-1.0762	0.249315	0.441732
YGR103W	NOP7	-3.18861	-0.982491	-1.3575	-3.42626	-0.372243	-0.96641	yes
YGR104C	SRB5	-0.518873	-0.429792	0.45339	-0.566212	-0.348346	-0.151538
YGR105W	VMA21	1.1704	0.645031	-1.05076	0.764502	0.306782	-2.13066
YGR106C	VOA1	0.482227	0.0898279	-0.310679	0.127778	-0.172871	-0.377165
YGR108W	CLB1	0.358492	-0.901701	0.650878	0.160749	-0.922989	0.416262
YGR111W	#REF!	0.244201	-0.566584	-0.152247	0.125764	-1.22084	-0.347289
YGR112W	SHY1	-0.463602	-0.962073	0.134677	-0.79526	-0.681844	0.0844339
YGR116W	SPT6	-0.630413	-1.48497	-0.308346	5.90123	3.43046	5.5983	yes
YGR117C	#REF!	-0.169594	0.468849	0.0732098	-0.511381	0.500309	-0.42516
YGR118W	RPS23A	0.428894	-0.0293621	-0.265936	0.334178	0.250375	-0.459315
YGR119C	NUP57	-0.157711	-0.663699	-0.285073	-0.725825	-0.436921	-0.775813
YGR120C	COG2	-0.212994	-0.224449	0.132104	-0.351231	-0.264897	-0.0506926
YGR121C	MEP1	-0.302309	0.0727341	0.355232	-0.726656	0.100038	0.184816
YGR122W	#REF!	0.189437	-0.63743	0.359297	-0.092364	-0.960975	-0.102731
YGR123C	PPT1	-0.0476299	0.376885	0.124066	0.0972972	0.323788	-0.082873
YGR124W	ASN2	-0.744647	0.288786	-0.00219756	0.378942	1.7372	1.00233	yes
YGR128C	UTP8	0.141356	-1.0575	0.372248	0.148644	-1.41504	0.659211
YGR129W	SYF2	0.0389751	-0.134974	-1.41975	0.0267421	-0.250284	-1.82708
YGR130C	#REF!	-0.0857979	-0.675452	0.195113	-0.261146	-0.772236	-0.00245148
YGR132C	PHB1	-0.682935	-0.357863	-0.609162	-0.689181	-0.193183	-1.16595
YGR133W	PEX4	-0.30819	-0.409772	-0.0497861	-0.380808	-1.10749	-0.104092
YGR134W	CAF130	0.169139	0.147239	-0.19183	0.0041878	-0.320474	-0.827749
YGR135W	PRE9	-0.802061	-0.549725	-0.249136	0.199444	0.367732	0.2635
YGR140W	CBF2	0.809374	-0.163992	-0.177852	0.958159	-0.401143	-0.00980952
YGR141W	VPS62	0.350301	0.395006	1.08763	0.253103	0.388186	0.851802
YGR142W	BTN2	0.878919	0.0536941	0.235641	0.467384	-0.45063	0.139951
YGR143W	SKN1	0.28539	0.0388072	0.456777	0.055597	-0.565786	0.365832
YGR146C	ECL1	0.362374	-0.122172	0.407111	-0.071648	-0.316122	0.307048
YGR147C	NAT2	-0.592598	-0.467365	0.162692	-1.28397	-0.861812	0.109624
YGR148C	RPL24B	-0.471527	-0.776853	-0.417235	-0.439475	-0.363235	-0.804797
YGR149W	#REF!	-0.174335	0.750376	0.23644	-0.298834	0.757536	-0.176984
YGR150C	CCM1	1.1002	NA	-0.125788	0.347345	NA	-0.866733
YGR152C	RSR1	1.05876	1.38084	0.396568	0.328123	1.23498	-0.301257
YGR155W	CYS4	0.0799553	0.579668	0.566843	0.769313	1.78085	0.801691
YGR156W	PTI1	-0.458361	0.217411	0.0849696	1.51065	1.7068	2.19019	yes
YGR157W	CHO2	0.956513	0.795356	0.570143	0.604178	0.619698	0.163105
YGR158C	MTR3	0.703157	-0.142444	-0.0967152	1.19884	0.0161972	0.0326801
YGR159C	NSR1	-1.76145	-1.28444	-0.691878	1.1413	0.516173	2.41167	yes
YGR161C	RTS3	0.42758	0.512105	-0.242886	0.484628	0.457738	0.0871616
YGR162W	TIF4631	0.447813	0.924979	-10.6817	0.371397	0.617935	-10.5976
YGR163W	GTR2	0.291193	1.29992	1.14606	0.227177	1.35914	0.762711
YGR165W	MRPS35	0.128475	-0.0796671	0.23644	0.311828	0.123688	0.212181
YGR166W	TRS65	0.540679	0.387023	0.446961	0.514294	-1.13657	0.242404
YGR167W	CLC1	-0.47398	-0.573121	0.00131693	-0.553846	-0.459141	-0.396688	yes
YGR169C	PUS6	0.0857979	0.42097	0.0765456	-0.349449	0.509328	-0.0967452
YGR171C	MSM1	0.103185	-0.258813	0.0963995	-0.271447	-0.154591	-0.0691329
YGR173W	RBG2	-0.698299	1.01574	0.00375947	-1.46213	0.780195	0.0446168
YGR174C	CBP4	0.570131	0.497198	0.229233	0.194163	0.314375	0.19341
YGR175C	ERG1	1.38315	1.30492	0.326251	1.65134	1.23538	0.936788
YGR177C	ATF2	-0.928954	-0.117211	0.327001	-1.92762	-0.00850036	0.200888
YGR178C	PBP1	0.55037	0.0830003	0.314796	0.805756	-1.22628	0.108045
YGR179C	OKP1	-0.200349	0.173187	-0.095307	-0.10785	0.0991589	0.390333
YGR180C	RNR4	0.664081	0.0704732	0.0282677	0.925411	0.31259	0.228961
YGR183C	QCR9	-0.212431	0.67479	-0.135059	-1.11076	0.587472	-0.561879
YGR185C	TYS1	0.759727	0.535133	0.18273	0.40454	0.405353	-0.0935994
YGR186W	TFG1	-0.988149	0.0396872	0.107856	0.431809	0.821811	1.33994	yes
YGR187C	HGH1	-0.486311	0.225409	0.304164	-0.0570309	0.0592659	0.503732
YGR188C	BUB1	0.440014	0.107733	-0.216111	0.363812	-0.30171	-0.0192143
YGR189C	CRH1	0.243454	-0.206044	0.70634	0.15995	-0.956452	0.339051
YGR191W	HIP1	0.459561	-0.52215	-0.0793102	0.146188	-0.898206	-0.298242
YGR192C	TDH3	-1.07573	-1.99233	-0.980371	5.68397	3.3316	5.18509	yes
YGR193C	PDX1	0.212499	0.0112588	-0.672249	0.303183	-0.622648	-1.11466
YGR194C	XKS1	0.182615	-0.493861	-0.0983262	0.216403	-0.431453	0.305671
YGR195W	SKI6	0.223907	0.310255	-0.0967152	0.745329	0.506874	0.439273
YGR196C	FYV8	1.04591	0.497198	0.165212	0.59259	0.155201	0.0821219
YGR198W	YPP1	0.159674	0.105279	0.171632	-0.525398	-0.304581	-0.0468403
YGR200C	ELP2	0.0149503	0.126411	0.43011	0.144856	-0.549906	0.574215
YGR201C	#REF!	0.706468	0.200985	0.225213	0.030711	-0.0537236	-0.00983101
YGR202C	PCT1	-0.0358007	0.494083	0.263034	-0.241389	0.916168	0.49517
YGR203W	YCH1	NA	0.0348074	-0.673249	NA	0.259151	-0.491679
YGR204W	ADE3	-0.0597666	0.479148	-0.754005	2.52948	2.17431	1.338	yes
YGR205W	TDA10	0.697104	0.85206	-0.522798	0.809859	0.625203	-0.100148
YGR206W	MVB12	0.0588937	0.929611	NA	0.0358967	-0.172837	NA
YGR207C	CIR1	-0.152789	0.685868	-0.262771	-0.310788	0.813988	-0.0613398
YGR208W	SER2	-0.317651	-0.491316	0.70326	0.253103	-0.16969	1.6272
YGR209C	TRX2	-1.89669	-1.32691	-0.731955	-1.05642	-0.512422	0.802799	yes
YGR210C	#REF!	0.525857	0.274592	-0.0556427	0.827458	0.470688	-0.190897
YGR211W	ZPR1	-0.283332	-0.249359	-0.316449	1.1187	0.869808	0.837041	yes
YGR214W	RPS0A	0.164043	-0.162035	-1.30369	0.472257	-0.0903497	-1.58007
YGR218W	CRM1	-0.0254501	-0.792736	-0.691878	1.38607	-0.0333421	0.493104
YGR220C	MRPL9	NA	0.606354	0.405833	NA	0.342127	0.235628
YGR221C	TOS2	0.387163	0.127564	-0.514708	-0.214989	0.223737	-0.57459
YGR222W	PET54	0.890776	0.657123	NA	0.916664	0.66732	NA
YGR229C	SMI1	-0.380703	-1.00317	0.264915	-0.548319	-0.761022	-0.442236
YGR231C	PHB2	0.0366585	0.431458	-0.564035	-0.0497776	0.497015	-0.596179
YGR232W	NAS6	0.294801	0.170903	0.017027	0.394978	-0.170216	-0.143288
YGR233C	PHO81	-0.0657322	0.0290921	-1.09229	0.22682	0.359847	-1.16046
YGR234W	YHB1	-0.335558	-0.309997	-0.154829	1.53647	0.708818	1.1832	yes
YGR235C	MOS2	-2.97894	-1.92953	-0.152247	-4.58496	-3.38131	-0.779005
YGR237C	#REF!	0.678514	-2.35579	0.0274062	0.831909	-3	0.0525672
YGR238C	KEL2	0.213271	-0.476821	-0.165978	0.0735811	-0.967785	-0.60182
YGR240C	PFK1	-1.18057	-0.104072	0.225213	-0.91583	0.905028	1.14304
YGR241C	YAP1802	0.613555	-0.238928	-0.244966	0.678771	-0.092489	-0.470883
YGR243W	FMP43	0.201788	-1.70618	0.246841	0.154936	-3.17809	0.200074
YGR245C	SDA1	-1.94111	-1.93963	-2.31099	-0.780006	-1.96779	-2.6089
YGR246C	BRF1	-0.518454	0.0667031	0.128664	-0.600567	0.396079	0.419928
YGR247W	CPD1	0.383535	-0.465831	0.475669	0.291412	-0.866733	0.319785
YGR248W	SOL4	0.598072	-0.427905	-2.32475	0.629697	-0.501716	-2.27139
YGR250C	#REF!	-0.55715	-0.744975	-0.691878	-0.88712	-0.601061	-1.0123
YGR251W	NOP19	-0.165766	0.904689	-0.0595605	0.0762257	1.0788	-0.149556
YGR252W	GCN5	-0.148781	0.346049	0.31419	0.215241	0.796552	0.613259	yes
YGR253C	PUP2	-0.728445	-0.39927	-0.379039	0.164946	0.424315	0.498469
YGR254W	ENO1	-0.301738	-0.129861	-0.583646	1.71882	2.02737	1.05526	yes
YGR255C	COQ6	0.518017	0.623777	0.321137	0.0735811	0.415619	0.457695
YGR256W	GND2	0.0503822	-0.0320612	0.234948	-0.0512253	-0.107452	0.168113
YGR257C	MTM1	0.259381	0.377015	0.662816	-0.365079	0.29685	0.0230836
YGR258C	RAD2	-0.886098	-0.233588	-0.0362122	-0.956138	0.0381024	0.2665
YGR260W	TNA1	0.832096	-0.297718	-0.233414	0.620948	-0.393849	-0.452254
YGR261C	APL6	0.0622843	0.00263988	0.42161	-0.474009	0.261094	0.168113
YGR262C	BUD32	-10.5656	-0.8916	-0.744514	-10.062	-0.517806	-0.465722
YGR263C	SAY1	0.235216	-0.115477	0.350368	0.509391	-0.418143	-0.0623117
YGR264C	MES1	0.594293	0.812963	0.309642	0.0698108	0.841915	-0.481025
YGR266W	#REF!	-0.247035	-0.554985	-0.124761	-0.277411	-0.962815	-0.624695
YGR267C	FOL2	0.17228	-1.16005	-0.219175	0.222392	-2.27612	-0.324957
YGR269W	#REF!	-0.194667	0.365308	-0.235628	-0.574516	0.584963	-0.606065
YGR270W	YTA7	-0.112308	-0.297718	-0.232308	1.05949	0.200159	0.739657	yes
YGR271C-A	EFG1	-1.55608	-0.328991	-0.434937	-2.13471	-0.0630202	-1.04492
YGR271W	SLH1	-1.14562	0.540738	0.312676	-2.24826	0.664352	-0.407708
YGR274C	TAF1	-0.28249	-0.135967	-0.0170399	-0.335828	-0.112577	0.662836
YGR275W	RTT102	0.0371207	-0.0204899	0.282818	1.23888	0.473404	0.677459
YGR277C	CAB4	0.695535	-0.261978	0.260104	0.0854879	-0.329218	0.489876
YGR278W	CWC22	-0.67076	0.479148	0.297441	-1.18246	0.81219	0.397789
YGR279C	SCW4	0.515905	0.367234	0.206576	0.0646583	0.181181	0.471185
YGR280C	PXR1	-0.046925	0.0423239	-0.403477	0.0529975	0.386026	0.258332
YGR281W	YOR1	-0.479442	-0.920404	-0.0634888	-0.329031	-1	-0.558268
YGR282C	BGL2	0.466486	0.786316	0.32605	0.550061	0.766219	-0.082873
YGR283C	#REF!	0.0435366	-0.166955	0.429458	0.123199	0.0333519	0.82132
YGR284C	ERV29	0.381328	NA	-0.0313952	-0.264385	NA	-0.445568
YGR285C	ZUO1	0.234465	-0.346803	0.450822	0.18353	-0.168907	0.12522
YGR286C	BIO2	0.519894	0.509319	0.247581	0.0813371	0.588098	-0.196499
YGR287C	IMA1	0.284609	-0.151953	0.463618	0.210584	-0.56718	0.267518
YGR292W	MAL12	-0.128867	-0.378873	-0.982229	-0.368559	-0.985011	-1.34104
YGR296W	YRF1-3	0.782597	0.323826	-0.617801	0.0280663	-0.102431	-0.119975
YHL001W	RPL14B	0.671034	0.00766553	-0.629401	1.12901	-0.148659	-0.130661
YHL002W	HSE1	0.135728	-0.199962	0.516548	0.297703	0.139899	0.594727
YHL003C	LAG1	-0.224309	-0.758856	-0.765798	-0.0182889	-2.03772	-1.65801
YHL004W	MRP4	-2.12679	1.26747	0.783634	-2.49219	0.997644	0.547746
YHL007C	STE20	0.179324	0.261125	0.228965	-0.19905	0.461968	-0.114779
YHL008C	#REF!	0.609971	0.491421	0.528994	0.384003	0.15858	0.19662
YHL009C	YAP3	0.161255	0.0830003	-0.154201	0.0907484	0.608046	-0.0201582
YHL013C	OTU2	-0.657186	-2.44997	-0.0151366	-0.429051	-2.75465	-0.204944
YHL014C	YLF2	-0.318838	0.020203	-0.269259	-1.22284	0.0626556	-0.954196
YHL017W	#REF!	0.799104	-0.636978	0.391555	0.88851	-1.18674	0.0936451
YHL018W	#REF!	-10.5656	-10.6398	-10.5821	-10.062	-10.5812	-2.20777
YHL019C	APM2	0.423631	0.785294	0.1305	0.311828	1.12155	0.37036
YHL020C	OPI1	0.0461075	-0.332314	-0.560144	0.143591	-0.820797	-0.550463
YHL021C	AIM17	0.63532	-1.07374	0.0814161	0.133941	-1.61542	-0.193695
YHL025W	SNF6	-1.08782	-0.00770648	-0.43621	-0.917388	-0.0208677	0.276646
YHL026C	#REF!	0.841302	0.614027	-0.029729	0.892655	0.630015	-0.151538
YHL027W	RIM101	0.256093	-0.127935	-0.451657	-0.0983379	-1.19931	-1.32379
YHL028W	WSC4	0.0665083	-10.6398	0.392273	-0.802303	-10.5812	0.275634
YHL029C	OCA5	0.586073	-0.278946	0.0261128	0.322738	-0.371747	0.178337
YHL030W	ECM29	0.304139	-10.6777	0.411079	0.968198	-10.2761	0.995804	yes
YHL033C	RPL8A	-0.532874	-0.497811	-0.00572062	-0.319484	-0.0887723	0.142194
YHL034C	SBP1	-1.33196	-0.194778	0.072494	-1.14916	-0.327353	-0.00245148
YHL038C	CBP2	-0.182954	-0.301057	0.058103	-0.211859	-0.137221	0.152126
YHL039W	EFM1	0.0988691	0.835434	-0.617801	-0.519014	1.10223	-0.893785
YHL040C	ARN1	0.646682	-0.182864	0.454032	0.458415	-0.488222	0.365309
YHL048W	COS8	-0.529405	0.388804	0.208207	-0.932763	0.232581	0.704015
YHR001W	OSH7	0.580991	-0.0306142	0.175248	0.527605	0.133903	0.301702
YHR001W-A	QCR10	1.02267	0.459555	1.00564	0.961015	0.239776	0.659739
YHR003C	TCD1	0.812175	-2.34517	0.176081	0.621826	-2.44165	0.178337
YHR004C	NEM1	0.0872668	0.198623	0.220374	-0.287259	-0.0218235	-0.773764
YHR005C	GPA1	-10.6724	-10.6777	-9.68168	-10.0112	-10.2761	-10.5976
YHR006W	STP2	-0.000476058	0.0343994	0.140666	0.384003	-0.154936	0.704767
YHR007C	ERG11	0.0259442	-0.710534	0.267263	0.422777	-0.914089	0.279676
YHR008C	SOD2	-0.598352	-0.027846	-0.148557	-1.06205	-0.25702	-0.183924
YHR009C	TDA3	0.680569	0.14811	-0.0943019	1.09783	0.115767	-0.997553
YHR010W	RPL27A	-5.14886	-3.30268	-10.6817	-4.65368	-1.90544	-10.5976
YHR011W	DIA4	-1.11643	-0.369498	-1.37025	-1.64419	-0.388908	-0.714284
YHR012W	VPS29	0.748588	-0.954912	-0.618283	0.719243	-0.468769	-0.876488
YHR013C	ARD1	0.759072	0.283006	-0.252271	0.686609	0.410376	-0.681708
YHR015W	MIP6	0.647526	-1.31112	0.0196288	0.0386162	-2.8947	-0.137381
YHR016C	YSC84	0.685676	0.517653	0.210865	0.798541	0.692542	-0.0088724
YHR018C	ARG4	-0.171583	0.330008	0.755034	-0.811555	0.819273	1.12863
YHR021C	RPS27B	-0.735787	-1.17191	-0.948662	-0.231508	-0.438496	-0.946535	yes
YHR023W	MYO1	-0.561358	-0.645439	-0.174874	-1.32058	-0.713922	-0.432286
YHR024C	MAS2	0.509232	0.501676	-0.452859	-0.262765	0.258003	-0.469109
YHR025W	THR1	0.591137	NA	0.285137	0.689498	NA	1.00184
YHR027C	RPN1	-1.06374	-0.0186568	0.240429	0.999325	1.26781	1.96467
YHR029C	YHI9	-0.150825	-0.475596	0.321137	-0.385518	-1.18601	0.0967708
YHR030C	SLT2	-0.0918724	-0.161023	-0.0237213	-0.00135021	-0.117676	0.247025
YHR031C	RRM3	-0.00708942	0.579668	-0.206958	-0.0325168	0.472907	0.209768
YHR034C	PIH1	-10.6724	-10.6777	-10.6817	-10.0112	-5.18866	-6.34966
YHR035W	#REF!	0.749005	-0.180361	-10.5821	0.458573	-0.603921	-10.2021
YHR036W	BRL1	-0.0627463	-1.23678	0.00188096	-0.592404	-0.948205	-0.21486
YHR037W	PUT2	0.819745	0.15381	-0.116576	0.440786	-0.332087	-0.0359607
YHR038W	RRF1	0.169131	-0.438894	0.0490351	-0.917388	-1.32617	0.352465
YHR039C	MSC7	-10.6724	-10.6777	-10.6817	-5.61891	-6.46877	-10.5976
YHR039C-A	VMA10	-3.0342	-1.59813	-1.42732	-2.88214	-2.17181	-1.20494
YHR040W	BCD1	-0.360677	-0.460974	0.214655	-0.415037	-0.127648	0.144722
YHR041C	SRB2	0.0926333	-0.922116	-0.314185	0.00269663	-1.03045	-0.123973
YHR042W	NCP1	0.365898	-0.357863	0.270388	0.440786	-0.468761	0.797172
YHR043C	DOG2	-0.384426	-0.999548	-0.548719	-0.769725	-1.24135	-0.442236
YHR044C	DOG1	0.434138	0.526852	0.239419	-0.305595	0.558347	-0.507475
YHR046C	INM1	0.557595	0.774522	0.782357	0.679644	0.755232	0.777995
YHR047C	AAP1	-0.121599	-1.02692	0.412918	1.06013	-0.430184	1.15378
YHR049W	FSH1	-1.33196	-0.0919344	NA	-0.740118	-0.0151465	NA
YHR051W	COX6	1.2125	0.266346	0.413625	0.89868	0	0.472951
YHR052W	CIC1	-0.855442	-0.563977	0.24536	-1.19745	0.327502	0.467156
YHR053C	CUP1-1	-0.25774	-0.170916	0.207826	-0.517372	-0.0987049	0.137969
YHR055C	CUP1-2	-1.11643	-0.153964	0.217949	-1.24506	-0.287729	0.343806
YHR057C	CPR2	-0.922556	-0.23167	0.776216	-2.32473	0.0253718	0.775822
YHR058C	MED6	-0.361007	-0.979797	0.029805	-0.379052	-0.794931	0.831299
YHR059W	FYV4	0.303423	-0.752907	0.24165	-0.305595	-0.784271	0.267373
YHR060W	VMA22	-0.623064	0.559879	0.0751765	-1.89714	0.500948	0.0242884
YHR061C	GIC1	0.129283	0.428189	-0.564035	0.61904	0.841519	-0.895414
YHR062C	RPP1	0.324686	-0.213528	-0.361764	1.15349	0.231779	-0.63607
YHR063C	PAN5	0.0881626	-0.710534	0.235641	0.850095	-0.481853	0.409823	yes
YHR064C	SSZ1	-0.367133	-1.43522	-0.391083	0.0826121	-1.14866	-0.645618
YHR066W	SSF1	-0.598352	-0.334871	0.39012	-0.279048	-0.157034	0.816772
YHR067W	HTD2	0.253004	1.34534	0.797778	-0.0919402	1.31589	0.629183
YHR068W	DYS1	0.0140752	-0.256707	0.279772	1.00975	0.883747	1.14177	yes
YHR069C	RRP4	-0.0607591	-0.972681	-0.136093	0.324894	-0.484485	0.00854752
YHR070W	TRM5	-1.76253	0.334206	0.884852	-2.22987	0.855733	0.971794	yes
YHR072W	ERG7	-0.799049	-0.294388	0.749335	-1.20718	-0.61686	0.867326
YHR073W	OSH3	-0.988149	0.96337	0.532902	-0.882137	0.778549	0.115289
YHR074W	QNS1	0.459561	0.727622	-0.111483	-0.17635	0.898074	-0.152275
YHR077C	NMD2	0.127666	-0.0927571	-2.18982	0.227177	-0.790295	-3.40776
YHR079C	IRE1	-1.73873	0.0502008	-0.255413	-1.99442	-0.201983	-0.520771
YHR080C	#REF!	-0.0989918	0.282792	0.0149794	-1.15516	0.10705	-0.419126
YHR082C	KSP1	-0.0332222	-0.0306142	0.151721	0.187067	-0.451918	-0.0574656
YHR083W	SAM35	-0.157711	0.332109	-0.106138	-0.302143	0.307899	-1.05649
YHR084W	STE12	-0.317651	-0.162035	0.355967	-0.00812026	0.264289	0.674393
YHR085W	IPI1	-0.545721	0.0970674	-0.0378215	-0.876801	0.787945	-0.235643
YHR086W	NAM8	-0.189617	-0.0666948	-0.0243592	0.534703	-0.103697	-0.029631	yes
YHR087W	RTC3	-0.229072	-0.658226	-0.322399	0.391224	-0.129989	0.233546
YHR088W	RPF1	-3.40564	-0.39579	-0.988191	-4.42626	-0.0485085	-1.24224	yes
YHR089C	GAR1	-1.06573	-2.2304	-2.06251	1.3399	-0.896452	-0.0397325	yes
YHR090C	YNG2	-0.806692	0.373489	-0.35975	-0.664714	-0.0521227	-0.217126
YHR093W	AHT1	0.428068	0.553732	0.171075	-0.389621	0.343612	-0.1756
YHR094C	HXT1	0.21742	0.240556	0.414332	-0.00405441	0.134761	0.107353
YHR097C	#REF!	-0.123603	0.0671142	-0.0799069	0.15995	-0.041307	0.068637
YHR098C	SFB3	0.0974125	0.171685	0.313383	-0.466263	0.365927	0.221794
YHR101C	BIG1	-0.516342	0.0954196	-0.0724989	-2.05123	0.0681715	-0.133041
YHR102W	KIC1	0.654195	0.336055	0.57141	0.0965636	0.14757	0.145498
YHR103W	SBE22	0.215557	-10.6777	0.647558	-0.0197054	-10.2761	0.738362
YHR104W	GRE3	0.350301	0.0396872	-0.582142	1.22162	-0.230261	-0.252297
YHR106W	TRR2	0.622195	-0.257759	0.319731	0.21398	-0.357261	0.192761
YHR107C	CDC12	0.343686	0.169338	-0.269108	-0.162604	0.267874	-0.46573
YHR108W	GGA2	0.74333	0.0606468	0.105234	0.686147	-0.492412	0.0446168
YHR109W	CTM1	0.555792	0.225409	-0.529393	0.0041878	0.323788	-0.334318
YHR110W	ERP5	0.735374	-1.05019	0.0547243	0.640721	-1.49149	0.0226328
YHR111W	UBA4	-0.994706	-1.29834	-9.09672	-0.841302	-1.43377	-10.5976
YHR112C	#REF!	0.774828	0.281304	0.444381	0.415712	0.161951	0.0517237
YHR113W	APE4	-0.816	0.0970674	0.559114	-2.34589	0.372233	0.775822
YHR114W	BZZ1	-0.293047	-0.530515	-0.216111	-0.749132	-1.00466	-0.438977
YHR115C	DMA1	0.297059	0.410056	-0.109451	0.54158	0.333932	-0.80338
YHR116W	COX23	0.857538	0.558652	0.492668	0.0280663	0.633726	0.410745
YHR117W	TOM71	-0.294115	-0.149945	0.107856	-0.293862	-0.215972	-0.110688
YHR118C	ORC6	-0.450838	-0.0456332	-0.306638	2.31661	2.912	2.41277	yes
YHR119W	SET1	-0.960099	-0.37535	-0.0218091	-0.691359	-0.0381688	0.665155	yes
YHR120W	MSH1	-1.25247	-0.480503	0.307007	-5.10434	-0.0497122	0.195203
YHR121W	LSM12	0.152098	-0.285544	0.190997	0.285575	0.0103218	0.523242
YHR122W	CIA2	0.7088	0.550032	0.519177	0.259882	0.524053	0.498316
YHR123W	EPT1	0.861391	-0.0392837	0.0623152	1.05082	0.151188	-0.380841
YHR127W	#REF!	-0.0160005	0.980045	0.312676	0.0682575	1.31913	0.408038
YHR129C	ARP1	-0.0322484	-0.303286	-0.0285127	-0.0341401	-0.959149	-0.0767104
YHR131C	#REF!	0.0890579	-0.487508	0.0177709	0.111631	-0.535441	-0.508637
YHR132C	ECM14	-0.288291	-0.217728	0.289763	-0.400268	-0.211603	-0.479316
YHR132W-A	IGO2	0.0774441	0.953457	-0.513006	0.454339	1.22173	-0.42641
YHR133C	NSG1	0.0588937	0.061217	0.57276	-0.131644	-0.387381	-0.134063
YHR135C	YCK1	-1.27368	-0.507795	-0.52686	-1.96683	-0.452757	-0.540949
YHR136C	SPL2	0.638382	-0.060477	0.00938036	0.850843	0.14842	-0.144132
YHR137W	ARO9	0.278343	0.880826	0.00563553	0.867952	1.36717	0.563577
YHR138C	#REF!	-0.0186837	0.22903	-0.22459	-0.612897	-0.067473	0.220992
YHR140W	#REF!	0.678191	0.571487	0.0955777	0.189436	0.282986	0.166383
YHR141C	RPL42B	0.667442	0.692244	0.314947	0.476143	0.49695	0.0901978
YHR143W	DSE2	0.308428	0.345342	-0.252271	0.460448	0.524775	-0.031533
YHR143W-A	RPC10	0.150942	0.571394	0.825621	-0.0282337	0.739291	1.05257	yes
YHR144C	DCD1	0.785361	0.67875	-0.0468666	0.672663	0.315889	-0.367653
YHR146W	CRP1	0.0401017	0.26186	0.752951	0.137249	0.211716	0.952679
YHR147C	MRPL6	-0.539283	-0.496567	-0.14543	-0.91583	-1.00466	0.224984
YHR149C	SKG6	0.435446	0.4236	-0.50925	0.635331	0.350497	-0.7474
YHR152W	SPO12	0.253129	0.359141	0.0342843	0.60624	0.398951	0.0462692
YHR154W	RTT107	-10.6724	-10.6777	-10.6817	-5.8413	-10.2761	-10.5976	yes
YHR155W	YSP1	0.614953	-0.0585923	-0.832273	0.525731	-0.225849	-1.14413
YHR156C	LIN1	-0.54321	-1.24533	0.0103151	-0.606719	-0.844799	0.225189
YHR158C	KEL1	-0.110183	-0.849583	0.17397	-0.489627	-1.01168	0.196016
YHR159W	TDA11	-0.118495	-0.712015	-0.375128	-1.19168	-0.643091	-0.484447
YHR161C	YAP1801	0.288511	-0.199962	-0.100343	-0.0135593	-0.369312	-0.122639
YHR162W	MPC2	-0.147884	-1.44171	-0.16795	-0.312523	-1.41194	-0.498239
YHR163W	SOL3	-0.0959363	-0.180361	0.249957	0.0990857	-0.263788	0.469417
YHR164C	DNA2	-0.523919	0.141567	-0.00660273	-0.671877	-0.0189582	0.313576
YHR165C	PRP8	0.365898	-0.572359	-0.600575	1.05365	-0.457079	-0.475906
YHR166C	CDC23	-0.592941	-0.11357	0.135306	-0.86148	-0.736966	0.405228
YHR167W	THP2	-0.291964	-0.0927571	-0.180836	0.339712	0.12155	-0.66685	yes
YHR168W	MTG2	-10.6724	-10.6777	-10.6817	-7.6893	-6.9542	-10.5976
YHR169W	DBP8	1.08458	-0.37535	-1.51875	1.00875	-1.04593	-2.69433
YHR170W	NMD3	-0.93941	-0.76184	-1.03422	-1.9132	-0.704372	-0.393016
YHR172W	SPC97	-0.548304	0.341176	0.268878	-1.38187	0.434682	0.0480714
YHR173C	#REF!	0.299382	0.383961	-0.0733568	0.00404305	0.441861	0.0774868
YHR174W	ENO2	-0.464916	0.0830146	0.153414	-0.751433	-0.0605819	0.0646627
YHR175W	CTR2	-0.418578	0.0696342	0.621532	-0.934412	0.140673	-0.399142
YHR178W	STB5	-0.1862	0.473949	-0.451571	-0.312177	0.546794	-0.427337
YHR179W	OYE2	-0.0303736	0.488443	-1.86469	0.398164	1.24253	-0.993961
YHR181W	SVP26	0.642046	0.813992	0.598389	0.436803	0.56664	0.32633
YHR182W	#REF!	-0.0707226	0.0103613	-0.747671	-0.193224	0.0991589	-1.17146
YHR183W	GND1	0.0418202	-0.103126	0.314089	4.89313	4.08397	4.64414	yes
YHR186C	KOG1	-0.153008	-0.949795	0.00750916	-0.230739	-1.24581	-0.565499
YHR187W	IKI1	-10.5656	-0.233588	-0.123735	-10.062	0.055424	-0.0435141
YHR188C	GPI16	NA	0.000452043	0.150873	NA	-0.756242	0.0728366
YHR189W	PTH1	-0.541824	0.416845	0.792354	-1.43999	-0.14553	0.200888
YHR190W	ERG9	-2.13513	-1.20725	-0.0246783	-2.96401	-1.93015	-0.661027
YHR192W	LNP1	0.206736	-0.712015	0.372781	-0.648418	-0.666815	-0.350375
YHR193C	EGD2	-0.559954	-0.635572	0.227626	-0.478963	-0.183526	0.54942
YHR194W	MDM31	-0.134081	-0.0113474	0.410796	0.0581917	0.303733	0.531739
YHR195W	NVJ1	0.135728	-0.939353	-2.18982	0.0698108	-1.11768	-3.17976
YHR196W	UTP9	-0.0687244	-0.289959	0.501337	-0.0300004	0.0572353	0.817467
YHR197W	RIX1	0.0974125	-0.422691	0.057259	0.837396	-0.229	0.659801
YHR198C	AIM18	-10.6724	-10.6777	-10.6817	-9.01123	-4.29884	-7.42766
YHR199C	AIM46	-0.529405	0.556809	0.526382	-1.76284	0.315132	0.362978
YHR200W	RPN10	-0.67076	-0.847003	-1.93829	-0.280686	0.00657693	-2.12531
YHR201C	PPX1	0.366494	-0.833799	0.209347	0.453318	-1.08383	0.367476
YHR203C	RPS4B	-0.93941	-0.827533	-1.11562	-1.30732	-1.28177	-0.668329
YHR204W	MNL1	0.00176693	0.0704732	-0.0985949	-0.00419999	0.633019	-0.356796
YHR205W	SCH9	-1.08984	-0.271286	-0.702559	-0.762838	-0.0704364	-0.728418
YHR206W	SKN7	-0.0367072	-0.0456332	-0.129969	-0.0760622	0.151188	0.204929
YHR207C	SET5	-1.44404	-1.20516	-0.536382	-0.857475	-1.40129	-0.45561
YHR208W	BAT1	0.577873	0.490326	-0.121345	0.102515	0.456891	0.00139593
YHR209W	CRG1	0.288301	-0.26939	0.735647	-0.344116	-0.375258	0.673292
YHR215W	PHO12	0.392975	0.672523	-0.361764	-0.0776277	0.518805	-1.05747
YHR216W	IMD2	-0.51301	-0.843753	0.204128	-0.123937	-0.143449	0.745513
YIL001W	#REF!	0.0932751	0.190331	-9.68168	-0.566212	0.114045	-10.5976
YIL002C	INP51	-0.591608	-0.032962	-0.458883	-0.499475	-0.39501	-0.633246
YIL004C	BET1	-10.6724	-10.6777	-10.6817	-6.5518	-9.27612	-6.27566
YIL005W	EPS1	-0.527767	-0.0796671	0.221451	-1.14704	-0.193975	0.28582
YIL007C	NAS2	-0.0503735	-0.251455	0.355183	0.411889	-0.643129	0.496491
YIL008W	URM1	-1.54572	-2.15024	-1.68168	-1.03109	-2.53466	-2.7521
YIL009W	FAA3	1.16447	0.896454	0.146629	0.797489	0.740728	-0.227709
YIL010W	DOT5	-0.300649	-0.0815299	-0.0154537	-0.321229	-0.112475	0.0023258
YIL014W	MNT3	0.238967	-1.22857	0.00569803	-0.466263	-0.914181	0.140505
YIL015W	BAR1	0.532146	-0.327886	0.244618	0.173648	0.196566	0.0198804
YIL016W	SNL1	0.54621	-0.196849	0.0112491	0.767677	-0.701617	-0.272865
YIL017C	VID28	-0.0781007	0.0738244	-0.0351189	-0.0938552	0.0219382	-0.764697
YIL018W	RPL2B	-0.364086	0.45478	0.0222259	-1.52741	0.474583	-0.377209
YIL020C	HIS6	-1.09311	-0.321268	-0.698684	-1.33527	-0.352797	-0.503509
YIL021W	RPB3	-2.07997	-0.960043	-0.993427	3.49086	5.00762	3.34328	yes
YIL024C	#REF!	-10.5656	-10.6398	-10.5821	-10.062	-6.77385	-10.2021
YIL026C	IRR1	-0.217957	-0.412177	-0.498663	2.74732	1.21118	2.33825	yes
YIL027C	EMC5	0.681162	-0.382405	0.286681	0.26775	-0.15284	0.639441
YIL030C	SSM4	0.837434	0.245141	0.369871	0.908779	-0.00566134	0.0529047
YIL031W	ULP2	-0.587617	-0.51911	-0.707263	-1.52741	-1.16499	-0.796687
YIL033C	BCY1	-0.0276677	0.125604	0.66705	-0.651478	-0.925185	0.54452	yes
YIL034C	CAP2	-0.122641	0.727954	-0.308813	-1.5559	0.901918	-0.579387
YIL035C	CKA1	0.394337	0.846822	-0.12613	0.968912	1.264	0.332411
YIL038C	NOT3	0.204092	-0.120256	0.336523	-0.184679	-1.22084	0.247903
YIL039W	TED1	0.0601307	0.426969	0.708453	-0.499804	0.256427	0.543551
YIL040W	APQ12	-0.332575	0.507156	-0.436125	-0.259683	0.6149	-0.452929
YIL041W	GVP36	0.503748	0.166201	-0.825252	0.594252	0.347757	-2.59196
YIL042C	PKP1	-1.53543	-0.127935	0.102957	-2.23644	-0.308898	0.291917
YIL043C	CBR1	-0.102054	0.25654	-0.0517356	-0.572198	0.608006	-0.410961
YIL044C	AGE2	0.516164	-0.485427	0.480714	1.01668	0.518291	0.745599
YIL045W	PIG2	-10.6724	0.409743	-0.0734228	-10.0112	-0.130192	-0.114779
YIL046W	MET30	-0.0807552	-0.4475	-0.0595605	-0.39139	-0.629916	0.105077
YIL047C	SYG1	-0.0148314	0.0753111	0.0187001	-0.40741	-0.0833487	-0.331759
YIL048W	NEO1	-2.89315	-0.369498	-1.78773	-3.41819	-0.363243	-2.69433
YIL050W	PCL7	0.631024	0.283535	-0.517399	0.641857	0.067157	-1.36607
YIL051C	MMF1	-0.157248	-0.0727875	0.144076	-0.162689	-0.0783688	-0.0259507
YIL052C	RPL34B	-0.135207	-3.7829	0.00219421	0.284542	-4.84986	-0.00513
YIL053W	RHR2	0.342064	-0.281142	0.449904	3.93866	1.9174	3.61116	yes
YIL054W	#REF!	-0.88083	-10.6398	0.135534	-1.2103	-6.41128	-0.264014
YIL055C	#REF!	-0.00907208	1.75628	0.965235	-0.513224	1.85473	0.2665
YIL056W	VHR1	-0.574056	-0.0890461	-0.0783162	-0.909761	-0.0724154	-0.138729
YIL057C	RGI2	-0.465411	-0.0538382	-0.0678882	-2.28331	0.0150463	0.283527
YIL059C	#REF!	0.236938	-0.918694	-1.02564	-0.370303	-1.01515	-1.40122
YIL061C	SNP1	-0.417397	0.572579	0.131302	-0.454721	0.822566	0.408038	yes
YIL062C	ARC15	0.542946	-0.868303	-0.570915	0.409629	-0.672808	-0.030947
YIL063C	YRB2	0.157297	-0.525435	-0.00219756	0.354002	-0.40576	0.32351	yes
YIL064W	SEE1	-0.103519	-0.150243	0.3483	-0.714311	-0.449576	0.604537
YIL065C	FIS1	0.220691	-1.64544	-0.954608	0.364219	-1.47268	-0.670742
YIL066C	RNR3	0.203433	-0.0492058	-0.480166	-0.904699	-0.575576	-0.864502
YIL068C	SEC6	0.650629	0.137664	0.148045	-0.02966	-0.113733	-0.242236
YIL069C	RPS24B	-0.623064	-0.138951	-0.446433	-1.24187	-0.10851	-0.391552
YIL070C	MAM33	0.819206	0.901304	-0.0449236	-0.0819066	1.00892	-0.142779
YIL071C	PCI8	0.339501	0.074661	0.273972	0.00975268	-1.0449	-0.22799
YIL074C	SER33	-0.234661	0.734703	0.104359	-0.266007	0.398225	0.127673
YIL075C	RPN2	-0.243019	0.278657	-0.484461	1.35126	1.67078	0.680862	yes
YIL076W	SEC28	0.555955	-0.177291	0.18273	0.0333509	-0.0655007	0.0158339
YIL077C	#REF!	-0.0667289	-0.834049	-0.00565763	-0.366818	-0.619751	-0.397993
YIL078W	THS1	-0.0109893	-0.458641	-0.342543	-0.0776277	-0.310905	-0.216282
YIL079C	AIR1	-2.47812	0.397068	-0.869615	-1.68267	0.393931	-0.404462	yes
YIL083C	CAB2	0.494365	0.280833	0.544132	0.129603	-0.372243	0.543882
YIL084C	SDS3	-0.114005	0.327905	-1.04143	-0.00560271	0.668588	-1.58078
YIL085C	KTR7	0.998571	0.31876	0.242021	0.850095	0.531239	0.307651
YIL088C	AVT7	0.0665113	-1.10218	-0.898679	-0.268076	-1.25932	-0.891955
YIL089W	#REF!	0.955041	0.430328	0.17191	0.755737	-0.0763816	0.362978
YIL090W	ICE2	0.457502	-0.462187	0.55613	0.385378	-2.71388	-0.394239
YIL091C	UTP25	0.303423	-0.148289	0.0865067	0.624491	-0.0569559	-0.0888019	yes
YIL092W	#REF!	-1.48876	0.662275	0.47314	-2.41099	0.598709	0.170741
YIL093C	RSM25	-0.00238186	0.220518	0.288223	-1.03691	0.504272	-0.0857799
YIL094C	LYS12	0.154917	0	0.127287	-0.224958	-0.413487	0.333889
YIL095W	PRK1	0.100646	-0.761742	-1.79424	-0.205621	-0.921205	-2.20777
YIL096C	#REF!	-0.0604784	0.204923	-0.649632	-0.00560271	0.667123	-1.2269
YIL097W	FYV10	0.449108	0.727954	-0.253317	0.25673	0.788618	-0.00980952
YIL098C	FMC1	0.533112	1.11426	-0.0170399	-0.568191	0.98628	-0.210602
YIL101C	XBP1	-0.874764	0.452207	-9.68168	-2.49553	0.25233	-8.59759
YIL103W	DPH1	0.855052	0.26626	-0.544687	1.16744	0.809348	-0.234547
YIL104C	SHQ1	-0.344873	-0.267268	0.0773783	-0.0253853	-0.0140296	-0.859495
YIL105C	SLM1	-0.39816	-1.66825	0.527689	-0.452867	-1.98129	0.454301
YIL106W	MOB1	-1.54044	0.164338	-0.440035	-2.40383	-0.0122944	-0.63607
YIL107C	PFK26	0.114781	0.290205	-0.190898	0.0826121	0.233382	-0.526167
YIL108W	#REF!	1.04913	-10.6398	0.498009	0.594379	-10.5812	0.696478
YIL111W	COX5B	0.570772	-0.287749	-0.405969	-0.0217564	-0.654905	-1.30428
YIL112W	HOS4	-0.845877	-0.267268	0.265959	-1.69834	-0.172837	0.00511183
YIL113W	SDP1	0.0123233	-0.328991	0.435965	-0.147041	-0.740849	0.280464
YIL115C	NUP159	-0.530779	0.369336	0.328501	-0.370303	0.34287	-0.0122993
YIL118W	RHO3	0.572533	-0.530515	-10.6817	0.147382	-0.890262	-9.01262
YIL119C	RPI1	0.0140752	-0.166955	0.383065	0.197007	-0.025826	0.243191
YIL122W	POG1	-0.0151069	-0.340098	-0.300135	0.14612	-1.1062	0.167285
YIL123W	SIM1	-0.0959363	-0.0241633	0.925157	-0.42361	-0.128959	0.757878
YIL124W	AYR1	0.0610435	-0.123108	0.276616	-0.568191	-0.332087	0.205144
YIL125W	KGD1	0.656009	1.55865	-0.255712	0.0620752	1.53514	-0.289234
YIL126W	STH1	0.0728578	0.197835	-0.464499	1.87386	0.69841	1.08501	yes
YIL127C	RRT14	-0.125747	-0.509222	-0.290971	-0.57823	-0.402536	-0.891511
YIL128W	MET18	-0.150825	0.0603726	0.0798736	0.173648	-0.551611	0.0976413
YIL129C	TAO3	0.250606	0.162723	-1.57371	-0.264385	-0.25702	-2.13066
YIL130W	ASG1	0.252387	0.292386	0.112738	0.626303	0.809348	0.469847	yes
YIL131C	FKH1	-0.080903	0.428189	-0.26488	0.269544	1.2961	0.284292	yes
YIL132C	CSM2	-0.0119488	-0.0426715	-0.4684	-0.507457	0.0344291	-0.472503
YIL133C	RPL16A	0.650561	0.695039	0.195935	1.31027	0.561545	0.589853
YIL135C	VHS2	-0.444809	0.0821685	-0.0423369	-0.689299	0.288025	0.235303
YIL136W	OM45	0.640215	0.465461	0.27972	0.223356	0.677365	-0.425691
YIL137C	TMA108	0.292637	-0.255655	0.0963995	-0.17992	-0.967785	-0.20957
YIL138C	TPM2	1.0583	1.87023	0.412918	1.11163	2.12249	0.591479
YIL140W	AXL2	-0.257239	-0.186522	0.405122	-1.36856	-0.398806	-0.234898
YIL143C	SSL2	-0.498144	-0.25393	-0.322399	4.69446	3.83408	4.67377	yes
YIL144W	TID3	-0.167606	0.19803	0.698783	-0.159478	0.15014	0.902757
YIL145C	PAN6	-10.6724	-10.6777	-10.6817	-4.7633	-3.49476	-10.5976
YIL147C	SLN1	1.02548	0.999095	0.229233	0.943578	0.836652	0.0728366
YIL148W	RPL40A	-10.6724	-10.6777	-10.6817	-10.0112	-2.97234	-10.5976
YIL149C	MLP2	0.556603	0.753598	-0.969273	0.689498	0.742417	-0.990236
YIL150C	MCM10	-0.295283	0.43769	0.194291	0.385037	0.878231	0.770856	yes
[truncated: 2,267 more rows]
