# Supplementary material for: Inhibition of transcription leads to rewiring of locus-specific chromatin proteomes
Source: Genome Res. 2020 Apr;30(4):635–46. doi: 10.1101/gr.256255.119 (PMC7197482; doi:10.1101/gr.256255.119)
Supplement: Supplemental Material [file supp_gr.256255.119_Supplemental_Table_S2.xlsx]

## Sheet: README
Supplemental Table S2
Epi-Decoder-HO Chrom-3xBC-inhibitor barcode counts
Mean (mn) IP/IN and standard deviations (sd) for each indicated time point, for both phenantroline (PH) and 5-azauracil (AZ; two biological replicates r1 and r2) at BC_UP and BC_DN.
The factors used for the 9 groups in Figure 2C and their sort numbers are indicated
mn1	vehicle control, untreated
mn5	5 min PH/AU
mn12	12 min PH/AU
mn30	30 min PH/AU
mn75	75 min PH/AU
Raw sequencing data and corresponding reference tables have been submitted to the NCBI BioProject database (https://www.ncbi.nlm.nih.gov/bioproject/) under accession number PRJNA610036, and to the the NCBI BioSample database (https://www.ncbi.nlm.nih.gov/biosample/) under accession number SAMN14271071

## Sheet: PH_UP
ORF	Name	mn1	mn5	mn12	mn30	mn75	sd1	sd5	sd12	sd30	sd75	Description	CYC2008	slim_term_P	Cramer	yetfasco	GO_cat	complex	fig 2c	nr
YOR151C	RPB2	4.38085	3.68212	3.50476	3.10522	2.49974	0.303574	0.315385	0.459222	0.42228	0.54014	RNA polymerase II second largest subunit B150; part of central core; similar to bacterial beta subunit	DNA-directed RNA polymerase II complex	transcription from RNA polymerase II promoter	RNAPII	NA	DNA	RNAPII	1	1
YDL140C	RPO21	3.54581	3.02318	2.52543	2.43076	1.4905	0.074408	0.0791039	0.146413	0.224843	0.118454	RNA polymerase II largest subunit B220; part of central core; phosphorylation of C-terminal heptapeptide repeat domain regulates association with transcription and splicing factors; similar to bacterial beta-prime	DNA-directed RNA polymerase II complex	DNA repair_cellular response to DNA damage stimulus_transcription from RNA polymerase II promoter	RNAPII	NA	DNA	RNAPII	1	2
YOL005C	RPB11	3.34417	2.02354	1.71112	1.50872	1.24991	0.203344	0.238459	0.215737	0.433893	0.484312	RNA polymerase II subunit B12.5; part of central core; similar to Rpc19p and bacterial alpha subunit	DNA-directed RNA polymerase II complex	DNA-templated transcription, termination_transcription from RNA polymerase II promoter	RNAPII	NA	DNA	RNAPII	1	3
YIL021W	RPB3	4.24157	2.40812	2.12699	2.14637	1.52395	0.136067	0.089746	0.167521	0.130527	0.222897	RNA polymerase II third largest subunit B44; part of central core; similar to prokaryotic alpha subunit	DNA-directed RNA polymerase II complex	DNA-templated transcription, termination_transcription from RNA polymerase II promoter	RNAPII	NA	DNA	RNAPII	1	4
YDR404C	RPB7	2.85526	1.42458	1.27586	1.10721	1.23675	0.249221	0.20662	0.240305	0.128229	0.326221	RNA polymerase II subunit B16; forms dissociable heterodimer with Rpb4p; Rpb4/7 dissociates from RNAPII as Ser2 CTD phosphorylation increases; Rpb4/7 regulates cellular lifespan via mRNA decay process; involved in recruitment of 3'-end processing factors to transcribing RNA polymerase II complex, export of mRNA to cytoplasm under stress conditions; also involved in translation initiation	DNA-directed RNA polymerase II complex	DNA-templated transcription, initiation_RNA catabolic process_regulation of translation_transcription from RNA polymerase II promoter_translational initiation	RNAPII	NA	RNA	RNAPII	1	5
YGR063C	SPT4	3.68035	2.4805	2.48783	2.18279	1.3553	0.118711	0.0955428	0.247011	0.182176	0.317597	Component of the universally conserved Spt4/5 complex (DSIF complex); the complex has multiple roles in concert with RNA polymerases I and II, including regulation of transcription elongation, RNA processing, quality control, and transcription-coupled DNA repair; Spt4p also localizes to kinetochores and heterochromatin and affects chromosome dynamics and silencing; required for transcription thro…	DSIF complex	DNA repair_DNA-templated transcription, elongation_RNA splicing_cellular response to DNA damage stimulus_chromatin organization_chromosome segregation_mRNA processing_rRNA processing_regulation of DNA metabolic process_transcription from RNA polymerase I promoter_transcription from RNA polymerase II promoter	NA	NA	RNA	other	2	6
YML010W	SPT5	3.18656	2.24841	2.40205	2.24322	1.29857	0.507198	0.310366	0.527745	0.592588	0.487174	Component of the universally conserved Spt4/5 complex (DSIF complex); the complex has multiple roles in concert with RNA polymerases I and II, including regulation of transcription elongation, RNA processing, quality control, and transcription-coupled DNA repair	DSIF complex	DNA repair_DNA-templated transcription, elongation_RNA splicing_cellular response to DNA damage stimulus_mRNA processing_rRNA processing_regulation of DNA metabolic process_transcription from RNA polymerase I promoter_transcription from RNA polymerase II promoter	NA	NA	RNA	other	2	7
YKL160W	ELF1	3.98695	2.29833	2.07089	1.82839	1.02496	NA	NA	NA	NA	NA	Transcription elongation factor with a conserved zinc finger domain; implicated in the maintenance of proper chromatin structure in actively transcribed regions; deletion inhibits Brome mosaic virus (BMV) gene expression	NA	DNA-templated transcription, elongation_chromatin organization_transcription from RNA polymerase II promoter	NA	NA	DNA	other	2	8
YGL207W	SPT16	2.62503	2.61947	2.51034	2.39928	1.29899	0.3158	0.289003	0.400698	0.296557	0.432264	Subunit of the heterodimeric FACT complex (Spt16p-Pob3p); FACT associates with chromatin via interaction with Nhp6Ap and Nhp6Bp, and reorganizes nucleosomes to facilitate access to DNA by RNA and DNA polymerases; SPT16 specifically required for diauxic shift-induced H2B deposition onto rDNA genes; some mutations cause reduced nucleosome occupancy over highly transcribed regions of the yeast genome	FACT complex	DNA replication_DNA-templated transcription, elongation_DNA-templated transcription, initiation_chromatin organization_protein complex biogenesis_transcription from RNA polymerase II promoter	NA	NA	DNA	FACT	2	9
YML069W	POB3	2.42098	2.56889	2.36996	2.07697	1.1907	0.386396	0.322641	0.246714	0.170547	0.381593	Subunit of the heterodimeric FACT complex (Spt16p-Pob3p); FACT associates with chromatin via interaction with Nhp6Ap and Nhp6Bp, and reorganizes nucleosomes to facilitate access to DNA by RNA and DNA polymerases; protein abundance increases in response to DNA replication stress	FACT complex	DNA replication_DNA-templated transcription, initiation_chromatin organization_protein complex biogenesis_transcription from RNA polymerase II promoter	NA	NA	DNA	FACT	2	10
YPR052C	NHP6A	3.06622	2.96093	3.03923	2.98806	1.78077	0.809012	0.448643	0.437182	0.558955	0.646782	High-mobility group (HMG) protein; binds to and remodels nucleosomes; involved in recruiting FACT and other chromatin remodelling complexes to chromosomes; functionally redundant with Nhp6Bp; required for transcriptional initiation fidelity of some tRNA genes; homologous to mammalian HMGB1 and HMGB2; NHP6A has a paralog, NHP6B, that arose from the whole genome duplication; protein abundance incre…	NA	DNA repair_DNA-templated transcription, elongation_DNA-templated transcription, initiation_cellular response to DNA damage stimulus_chromatin organization_transcription from RNA polymerase II promoter_transcription from RNA polymerase III promoter	NA	yetfasco	DNA	FACT	2	11
YBR089C-A	NHP6B	1.307	1.83807	1.81462	1.78019	1.06905	0.10287	0.0337394	0.222026	0.111965	0.308036	High-mobility group (HMG) protein; binds to and remodels nucleosomes; involved in recruiting FACT and other chromatin remodelling complexes to the chromosomes; functionally redundant with Nhp6Ap; required for transcriptional initiation fidelity of some tRNA genes; homologous to mammalian HMGB1 and HMGB2; NHP6B has a paralog, NHP6A, that arose from the whole genome duplication	NA	DNA-templated transcription, elongation_DNA-templated transcription, initiation_chromatin organization_transcription from RNA polymerase II promoter_transcription from RNA polymerase III promoter	NA	yetfasco	DNA	FACT	2	12
YBR279W	PAF1	1.7656	1.0989	1.01182	0.917734	1.35465	0.555873	0.284827	0.0359069	0.114588	0.439141	Component of the Paf1p complex involved in transcription elongation; binds to and modulates the activity of RNA polymerases I and II; required for expression of a subset of genes, including cell cycle-regulated genes; involved in SER3 repression by helping to maintain SRG1 transcription-dependent nucleosome occupancy; homolog of human PD2/hPAF1	Cdc73p/Paf1p complex	DNA recombination_DNA repair_DNA-templated transcription, elongation_DNA-templated transcription, termination_cellular response to DNA damage stimulus_chromatin organization_histone modification_mRNA processing_mitotic cell cycle_peptidyl-amino acid modification_protein alkylation_protein modification by small protein conjugation or removal_protein phosphorylation_rRNA processing_regulation of DN…	NA	NA	RNA	PAF1	2	13
YGL244W	RTF1	1.88159	0.892296	0.743223	0.86644	0.518079	0.315454	0.128929	0.169944	0.206788	0.594789	Subunit of RNAPII-associated chromatin remodeling Paf1 complex; regulates gene expression by directing cotranscriptional histone modification, influences transcription and chromatin structure through several independent functional domains; directly or indirectly regulates DNA-binding properties of Spt15p and relative activities of different TATA elements; involved in transcription elongation as d…	Cdc73p/Paf1p complex	DNA repair_DNA-templated transcription, elongation_DNA-templated transcription, termination_cellular response to DNA damage stimulus_chromatin organization_histone modification_mRNA processing_peptidyl-amino acid modification_protein alkylation_protein modification by small protein conjugation or removal_protein phosphorylation_regulation of DNA metabolic process_regulation of protein modificatio…	NA	NA	RNA	PAF1	2	14
YOR123C	LEO1	1.85272	1.25867	0.735905	0.869424	1.08614	0.535329	0.295468	0.56029	0.328987	0.423684	Component of the Paf1 complex; which associates with RNA polymerase II and is involved in histone methylation; plays a role in regulating Ty1 transposition; involved in transcription elongation as demonstrated by the G-less-based run-on (GLRO) assay	Cdc73p/Paf1p complex	DNA repair_DNA-templated transcription, elongation_DNA-templated transcription, termination_cellular response to DNA damage stimulus_chromatin organization_histone modification_peptidyl-amino acid modification_protein alkylation_protein modification by small protein conjugation or removal_regulation of DNA metabolic process_regulation of protein modification process_transcription from RNA polymer…	NA	NA	DNA	PAF1	2	15
YOL145C	CTR9	2.18257	2.52271	2.20878	2.15659	0.769118	0.159247	0.0905161	0.202649	0.115932	0.262798	Component of the Paf1p complex involved in transcription elongation; binds to and modulates the activity of RNA polymerases I and II; required for expression of a subset of genes, including cyclin genes; involved in SER3 repression by helping to maintain SRG1 transcription-dependent nucleosome occupancy; contains TPR repeats	Cdc73p/Paf1p complex	DNA repair_DNA-templated transcription, elongation_DNA-templated transcription, initiation_DNA-templated transcription, termination_cellular response to DNA damage stimulus_chromatin organization_histone modification_mRNA processing_mitotic cell cycle_peptidyl-amino acid modification_protein alkylation_protein complex biogenesis_protein modification by small protein conjugation or removal_protein…	NA	NA	RNA	PAF1	2	16
YPR133C	SPN1	3.59053	2.77603	2.77918	2.4579	2.19643	0.357914	0.73892	0.867688	0.993082	1.307	Protein involved in RNA polymerase II transcription; is constitutively recruited to the CYC1 promoter and is required for recruitment of chromatin remodeling factors for the expression of CYC1 gene; interacts genetically or physically with RNAP II, TBP, TFIIS, and chromatin remodelling factors; central domain highly conserved throughout eukaryotes; mutations confer an Spt- phenotype	NA	DNA-templated transcription, elongation_chromatin organization_nuclear transport_nucleobase-containing compound transport_transcription from RNA polymerase II promoter	NA	NA	DNA	other	2	17
YGR116W	SPT6	3.5735	2.65581	2.49405	2.21188	1.10932	0.0142336	0.466061	0.475885	0.401793	0.446559	Nucleosome remodeling protein; functions in various aspects of transcription, chromatin maintenance, and RNA processing; required for the maintenance of chromatin structure during transcription in order to inhibit transcription from promoters within the coding region; required for H3K36 trimethylation but not dimethylation by Set2p	NA	DNA-templated transcription, elongation_DNA-templated transcription, initiation_DNA-templated transcription, termination_chromatin organization_histone modification_mRNA processing_mitotic cell cycle_nuclear transport_nucleobase-containing compound transport_peptidyl-amino acid modification_protein alkylation_protein complex biogenesis_regulation of protein modification process_response to chemic…	NA	NA	RNA	other	2	18
YGL097W	SRM1	2.49918	4.02211	4.01922	3.94752	2.43205	0.358868	0.0198281	0.116331	0.0252112	0.190721	Nucleotide exchange factor for Gsp1p; localizes to the nucleus, required for nucleocytoplasmic trafficking of macromolecules; suppressor of the pheromone response pathway; potentially phosphorylated by Cdc28p; human homolog of the RAN GEF, RCC1, can complement a temperature sensitive point mutant	NA	nuclear transport_nucleobase-containing compound transport_ribosomal subunit export from nucleus	NA	NA	DNA	other	2	19
YER063W	THO1	0.332108	0.540233	0.420409	0.385576	-0.389309	0.634712	0.221201	0.317762	0.0889589	0.144159	Conserved nuclear RNA-binding protein; specifically binds to transcribed chromatin in a THO- and RNA-dependent manner, genetically interacts with shuttling hnRNP NAB2; overproduction suppresses transcriptional defect caused by hpr1 mutation	NA	nuclear transport_nucleobase-containing compound transport	NA	NA	DNA	other	2	20
YIL101C	XBP1	-0.611569	-0.465122	-0.470305	-0.341179	-0.286829	0.388825	0.103733	0.0709766	0.0345503	0.815337	Transcriptional repressor; binds promoter sequences of cyclin genes, CYS3, and SMF2; not expressed during log phase of growth, but induced by stress or starvation during mitosis, and late in meiosis; represses 15% of all yeast genes as cells transition to quiescence; important for maintaining G1 arrest and for longevity of quiescent cells; member of Swi4p/Mbp1p family; phosphorylated by Cdc28p; r…	NA	chromatin organization_histone modification_regulation of protein modification process_response to chemical_response to oxidative stress_transcription from RNA polymerase II promoter	NA	yetfasco	DNA	other	3	21
YOR052C	#REF!	0.474683	0.799064	0.838842	0.653079	0.0353209	0.180295	0.19334	0.146743	0.12706	0.15484	AN1-type zinc finger protein of unknown function; may protect cells from trivalent metalloid induced proteotoxicity; contains a PACE promoter element, a transcriptional profile similar to CUZ1 and RPN2, and decreased expression in an RPN4 mutant; induced by nitrogen limitation and weak acid; ortholog of human AIRAP, which stimulates proteasome activity in response to arsenic; protein abundance in…	NA	response to chemical	NA	NA	other	other	0	22
YOR230W	WTM1	-0.0218748	0.873102	0.495531	0.174211	-0.224343	0.0685026	0.0476835	0.128457	0.0500415	0.352964	Transcriptional modulator; involved in regulation of meiosis, silencing, and expression of RNR genes; required for nuclear localization of the ribonucleotide reductase small subunit Rnr2p and Rnr4p; contains WD repeats	NA	chromatin organization_meiotic cell cycle_nuclear transport_protein targeting_transcription from RNA polymerase II promoter	NA	yetfasco	DNA	other	3	23
YLR182W	SWI6	0.150499	0.0312066	0.130659	0.422347	0.68544	0.872047	0.159213	0.239453	0.149645	0.567686	Transcription cofactor; forms complexes with Swi4p and Mbp1p to regulate transcription at the G1/S transition; involved in meiotic gene expression; also binds Stb1p to regulate transcription at START; cell wall stress induces phosphorylation by Mpk1p, which regulates Swi6p localization; required for the unfolded protein response, independently of its known transcriptional coactivators	MBF complex_SBF complex	DNA recombination_meiotic cell cycle_mitotic cell cycle_organelle fission_regulation of DNA metabolic process_regulation of cell cycle_regulation of organelle organization_response to heat_transcription from RNA polymerase II promoter	NA	yetfasco	DNA	other	3	24
YEL007W	MIT1	-0.778742	0.0956119	0.224786	0.0192471	0.0756631	0.504206	0.241186	0.080887	0.516654	0.650487	Transcriptional regulator of pseudohyphal growth; protein with sequence similarity to S. pombe gti1+ (gluconate transport inducer 1) and C. albicans Wor1	NA	biological_process	NA	NA	other	other	3	25
YPL128C	TBF1	0.0338693	0.402764	0.0944776	0.590843	0.132193	0.0209344	0.448811	0.537472	0.147486	0.213935	Telobox-containing general regulatory factor; binds TTAGGG repeats within subtelomeric anti-silencing regions (STARs), blocking silent chromatin propagation; binds majority of snoRNA gene promoters, required for full snoRNA expression; caps DSB flanked by long T2AG3 repeats and blocks checkpoint activation	NA	chromatin organization_regulation of DNA metabolic process_regulation of organelle organization_telomere organization_transcription from RNA polymerase II promoter	NA	yetfasco	DNA	other	3	26
YMR043W	MCM1	0.527155	0.480991	0.339639	0.39321	-0.588853	0.29325	0.226327	0.171848	0.150557	0.743497	Transcription factor; involved in cell-type-specific transcription and pheromone response; plays a central role in the formation of both repressor and activator complexes; relocalizes to the cytosol in response to hypoxia	ARGR complex	DNA replication_cellular amino acid metabolic process_mitotic cell cycle_transcription from RNA polymerase II promoter	NA	yetfasco	DNA	other	3	27
YKL112W	ABF1	-0.00623705	1.48515	1.37667	1.44733	0.900214	NA	NA	NA	NA	NA	DNA binding protein with possible chromatin-reorganizing activity; involved in transcriptional activation, gene silencing, and DNA replication and repair	nucleotide-excision repair factor 4 complex	DNA repair_DNA replication_cellular response to DNA damage stimulus_chromatin organization_transcription from RNA polymerase II promoter	NA	yetfasco	DNA	GRF	3	28
YOR298C-A	MBF1	1.23753	1.11597	1.12229	1.03695	0.335372	0.365559	0.216487	0.22011	0.250053	0.21188	Transcriptional coactivator; bridges the DNA-binding region of Gcn4p and TATA-binding protein Spt15p; suppressor of frameshift mutations; protein abundance increases in response to DNA replication stress	NA	transcription from RNA polymerase II promoter	NA	yetfasco	DNA	other	3	29
YBR049C	REB1	2.87033	3.22789	3.48174	3.34068	2.21765	2.53001	1.87314	1.92725	1.71514	1.03923	RNA polymerase I enhancer binding protein; DNA binding protein that binds to genes transcribed by both RNA polymerase I and RNA polymerase II; required for termination of RNA polymerase I transcription; Reb1p bound to DNA acts to block RNA polymerase II readthrough transcription	NA	DNA-templated transcription, initiation_DNA-templated transcription, termination_transcription from RNA polymerase I promoter_transcription from RNA polymerase II promoter	NA	yetfasco	DNA	GRF	3	30
YIL131C	FKH1	-0.356295	-0.0149626	-0.212151	-0.0290798	-0.364889	0.395211	0.281057	0.195105	0.290809	0.485693	Forkhead family transcription factor; rate-limiting replication origin activator; evolutionarily conserved lifespan regulator; binds multiple chromosomal elements with distinct specificities, cell cycle dynamics; regulates transcription elongation, chromatin silencing at mating loci, expression of G2/M phase genes; facilitates clustering, activation of early-firing replication origins; binds HML …	NA	DNA replication_DNA-templated transcription, elongation_DNA-templated transcription, termination_chromatin organization_mRNA processing_mitotic cell cycle_pseudohyphal growth_regulation of DNA metabolic process_regulation of cell cycle_response to chemical_transcription from RNA polymerase II promoter	NA	yetfasco	RNA	other	0	31
YCR065W	HCM1	-0.0134599	-0.413499	-0.378101	-0.224336	-0.293094	0.709877	0.117706	0.276845	0.295697	0.376711	Forkhead transcription factor; drives S-phase activation of genes involved in chromosome segregation, spindle dynamics, budding; also activates genes involved in respiration, use of alternative energy sources (like proline), NAD synthesis, oxidative stress resistance; key factor in early adaptation to nutrient deficiency and diauxic shift; suppressor of calmodulin mutants with specific SPB assemb…	NA	cytoskeleton organization_mitochondrion organization_response to chemical_response to oxidative stress_transcription from RNA polymerase II promoter	NA	yetfasco	DNA	other	0	32
YNL068C	FKH2	-0.0441547	-0.133051	-0.051003	-0.147951	-1.00204	0.298516	0.197952	0.132982	0.293069	0.10752	Forkhead family transcription factor; rate-limiting activator of replication origins; evolutionarily conserved regulator of lifespan; binds multiple chromosomal elements with distinct specificities, cell cycle dynamics; positively regulates transcriptional elongation; facilitates clustering, activation of early-firing replication origins; negative role in chromatin silencing at HML and HMR; major…	NA	DNA replication_DNA-templated transcription, elongation_chromatin organization_mitotic cell cycle_pseudohyphal growth_regulation of DNA metabolic process_regulation of cell cycle_transcription from RNA polymerase II promoter	NA	yetfasco	DNA	other	0	33
YNL216W	RAP1	4.48229	4.52666	4.83914	5.44297	4.76633	0.767786	0.080652	0.206513	0.517828	0.622495	Essential DNA-binding transcription regulator that binds many loci; involved in transcription activation and repression, chromatin silencing, and telomere length maintenance; relocalizes to the cytosol in response to hypoxia; conserved protein with an N-terminal BRCT domain, a central region with homology to the Myb DNA binding domain, and a C-terminal Rap1-specific protein-interaction domain (RC…	NA	carbohydrate metabolic process_cellular response to DNA damage stimulus_chromatin organization_cofactor metabolic process_generation of precursor metabolites and energy_monocarboxylic acid metabolic process_nucleobase-containing small molecule metabolic process_telomere organization_transcription from RNA polymerase II promoter	NA	yetfasco	DNA	GRF	0	34
YAL051W	OAF1	0.0750367	-0.627764	-0.465212	-0.595092	-0.447837	0.68306	0.223408	0.335079	0.360551	0.771734	Oleate-activated transcription factor; subunit of a heterodimeric complex with Pip2p, which binds to oleate-response elements (ORE) in the promoter of genes involved in beta-oxidation of fatty acids, peroxisome organization and biogenesis, activating transcription in the presence of oleate; regulates chromatin silencing at telomeres; involved in diauxic shift; OAF1 has a paralog, PIP2, that arose…	OAF complex	chromatin organization_lipid metabolic process_monocarboxylic acid metabolic process_response to chemical_transcription from RNA polymerase II promoter	NA	yetfasco	DNA	other	0	35
YDL106C	PHO2	0.59785	0.215152	0.0903929	0.384243	0.524427	1.22555	0.138531	0.224591	0.377567	0.574636	Homeobox transcription factor; regulatory targets include genes involved in phosphate metabolism; binds cooperatively with Pho4p to the PHO5 promoter; phosphorylation of Pho2p facilitates interaction with Pho4p; relocalizes to the cytosol in response to hypoxia	NA	cellular amino acid metabolic process_chromatin organization_nucleobase-containing small molecule metabolic process_transcription from RNA polymerase II promoter	NA	yetfasco	DNA	other	0	36
YMR037C	MSN2	-1.28507	-0.233693	-0.0403674	-0.25312	-0.414278	1.18294	0.262207	0.523224	0.142727	0.334172	Stress-responsive transcriptional activator; activated in stochastic pulses of nuclear localization in response to various stress conditions; binds DNA at stress response elements of responsive genes; relative distribution to nucleus increases upon DNA replication stress	NA	chromatin organization_response to chemical_response to heat_response to osmotic stress_response to oxidative stress_response to starvation_transcription from RNA polymerase II promoter	NA	yetfasco	DNA	other	0	37
YER088C	DOT6	-1.04175	-0.0276444	-0.0679996	0.175148	0.274493	NA	NA	NA	NA	NA	Protein involved in rRNA and ribosome biogenesis; activated in stochastic pulses of nuclear localization; binds polymerase A and C motif; subunit of the RPD3L histone deacetylase complex; has chromatin specific SANT domain; involved in telomeric gene silencing and filamentation; relative distribution to the nucleus increases upon DNA replication stress	NA	chromatin organization_transcription from RNA polymerase II promoter	NA	yetfasco	DNA	other	0	38
YMR182C	RGM1	-0.617932	-0.660366	-0.420941	-0.40101	-1.14163	1.43943	0.233895	0.128425	0.36632	0.550116	Putative zinc finger DNA binding transcription factor; contains two N-terminal C2H2 zinc fingers and C-terminal proline rich domain; overproduction impairs cell growth and induces expression of genes involved in monosaccharide catabolism and aldehyde metabolism; regulates expression of of Y' telomeric elements and subtelomeric COS genes; relocalizes to the cytosol in response to hypoxia; RGM1 has…	NA	transcription from RNA polymerase II promoter	NA	yetfasco	DNA	other	0	39
YER111C	SWI4	-0.0392633	-0.29396	0.0937899	-0.254669	0.332387	0.524743	0.122101	0.26297	0.1866	0.289327	DNA binding component of the SBF complex (Swi4p-Swi6p); a transcriptional activator that in concert with MBF (Mbp1-Swi6p) regulates late G1-specific transcription of targets including cyclins and genes required for DNA synthesis and repair; Slt2p-independent regulator of cold growth; acetylation at two sites, K1016 and K1066, regulates interaction with Swi6p	SBF complex	mitotic cell cycle_response to heat_transcription from RNA polymerase II promoter	NA	yetfasco	DNA	other	0	40
YDR005C	MAF1	0.357212	-0.022834	0.01739	0.0778092	-0.732843	0.42481	0.0550732	0.234929	0.0886823	0.535117	Highly conserved negative regulator of RNA polymerase III; involved in tRNA processing and stability; inhibits tRNA degradation via rapid tRNA decay (RTD) pathway; binds N-terminal domain of Rpc160p subunit of Pol III to prevent closed-complex formation; regulated by phosphorylation mediated by TORC1, protein kinase A, Sch9p, casein kinase 2; localizes to cytoplasm during vegetative growth and tr…	NA	chromatin organization_transcription from RNA polymerase II promoter_transcription from RNA polymerase III promoter	NA	NA	DNA	other	0	41
YML027W	YOX1	0.386613	-0.518292	-0.489165	-0.535834	-0.233067	0.341677	0.516577	0.142504	0.0572093	0.247554	Homeobox transcriptional repressor; binds to Mcm1p and to early cell cycle boxes (ECBs) in the promoters of cell cycle-regulated genes expressed in M/G1 phase; expression is cell cycle-regulated; phosphorylated by Cdc28p; relocalizes from nucleus to cytoplasm upon DNA replication stress; YOX1 has a paralog, YHP1, that arose from the whole genome duplication	NA	mitotic cell cycle	NA	yetfasco	other	other	0	42
YDR451C	YHP1	-0.353909	-0.356381	-0.496615	-0.0736794	0.494323	0.314022	0.456284	0.307128	0.110117	0.195797	Homeobox transcriptional repressor; binds Mcm1p and early cell cycle box (ECB) elements of cell cycle regulated genes, thereby restricting ECB-mediated transcription to the M/G1 interval; YHP1 has a paralog, YOX1, that arose from the whole genome duplication	NA	mitotic cell cycle_transcription from RNA polymerase II promoter	NA	yetfasco	DNA	other	0	43
YIR018W	YAP5	-1.04443	-0.352319	-0.228645	-0.196407	-0.0616554	NA	0.233633	0.0954829	0.144825	0.082316	Basic leucine zipper (bZIP) iron-sensing transcription factor; involved in diauxic shift; YAP5 has a paralog, YAP7, that arose from the whole genome duplication	NA	chromatin organization_response to chemical_transcription from RNA polymerase II promoter	NA	yetfasco	DNA	other	0	44
YOR229W	WTM2	-0.218779	-0.260324	-0.155521	-0.222529	-0.363226	0.720675	0.235321	0.306682	0.184373	0.638355	Transcriptional modulator; involved in regulation of meiosis, silencing, and expression of RNR genes; involved in response to replication stress; contains WD repeats; relocalizes to the cytosol in response to hypoxia; WTM2 has a paralog, UME1, that arose from the whole genome duplication	NA	cellular response to DNA damage stimulus_chromatin organization_meiotic cell cycle_transcription from RNA polymerase II promoter	NA	yetfasco	DNA	other	0	45
YDR146C	SWI5	-0.280048	-0.390521	-0.4705	-0.168248	0.58884	0.527267	0.354987	0.156254	0.0826304	0.0924446	Transcription factor that recruits Mediator and Swi/Snf complexes; activates transcription of genes expressed at the M/G1 phase boundary and in G1 phase; required for expression of the HO gene controlling mating type switching; localization to nucleus occurs during G1 and appears to be regulated by phosphorylation by Cdc28p kinase; SWI5 has a paralog, ACE2, that arose from the whole genome duplic…	NA	mitotic cell cycle_organelle fission	NA	yetfasco	other	other	0	46
YDR463W	STP1	0.860994	-0.0934037	-0.177519	-0.177539	-0.619814	0.212399	0.289358	0.156059	0.210001	0.454165	Transcription factor; contains a N-terminal regulatory motif (RI) that acts as a cytoplasmic retention determinant and as an Asi dependent degron in the nucleus; undergoes proteolytic processing by SPS (Ssy1p-Ptr3p-Ssy5p)-sensor component Ssy5p in response to extracellular amino acids; activates transcription of amino acid permease genes and may have a role in tRNA processing; STP1 has a paralog,…	NA	transcription from RNA polymerase II promoter	NA	yetfasco	DNA	other	0	47
YMR179W	SPT21	0.170259	-0.536106	-0.448742	-0.407906	-0.864957	0.755162	0.231106	0.4357	0.337005	0.305977	Protein with a role in transcriptional silencing; required for normal transcription at several loci including HTA2-HTB2 and HHF2-HHT2, but not required at the other histone loci; functionally related to Spt10p; localizes to nuclear foci that become diffuse upon DNA replication stress	NA	chromatin organization_transcription from RNA polymerase II promoter	NA	NA	DNA	other	0	48
YPR065W	ROX1	-0.385998	-0.356206	-0.0436477	-0.565224	-0.545428	0.882367	0.467611	0.248135	0.452466	0.172902	Heme-dependent repressor of hypoxic genes; mediates aerobic transcriptional repression of hypoxia induced genes such as COX5b and CYC7; repressor function regulated through decreased promoter occupancy in response to oxidative stress; contains an HMG domain that is responsible for DNA bending activity; involved in the hyperosmotic stress resistance	NA	response to osmotic stress_transcription from RNA polymerase II promoter	NA	yetfasco	DNA	other	0	49
YKL032C	IXR1	-0.275417	-0.362935	-0.179358	-0.226336	-0.155212	NA	0.293707	0.233364	0.307402	0.318825	Transcriptional repressor that regulates hypoxic genes during normoxia; involved in the aerobic repression of genes such as COX5b, TIR1, and HEM13; binds DNA intrastrand cross-links formed by cisplatin; HMG (high mobility group box) domain containing protein which binds and bends cisplatin-modified DNA, blocking excision repair; IXR1 has a paralog, ABF2, that arose from the whole genome duplicati…	NA	DNA repair_cellular response to DNA damage stimulus_response to chemical_transcription from RNA polymerase II promoter	NA	yetfasco	DNA	other	0	50
YPL075W	GCR1	0.0997321	-0.688476	-0.341525	-0.272382	-0.198474	0.133314	0.635116	0.31365	0.134202	0.0543416	Transcriptional activator of genes involved in glycolysis; DNA-binding protein that interacts and functions with the transcriptional activator Gcr2p	GCR complex	carbohydrate metabolic process_chromatin organization_cofactor metabolic process_generation of precursor metabolites and energy_monocarboxylic acid metabolic process_nucleobase-containing small molecule metabolic process_response to chemical_transcription from RNA polymerase II promoter	NA	yetfasco	DNA	other	0	51
YEL009C	GCN4	-0.234374	-0.668846	-1.04471	-0.68545	-0.6379	0.402954	0.108253	0.17094	0.147371	0.461437	bZIP transcriptional activator of amino acid biosynthetic genes; activator responds to amino acid starvation; expression is tightly regulated at both the transcriptional and translational levels	NA	DNA-templated transcription, initiation_protein complex biogenesis_response to chemical_response to starvation_transcription from RNA polymerase II promoter	NA	yetfasco	DNA	other	0	52
YBR239C	ERT1	NA	NA	NA	NA	NA	NA	NA	NA	NA	NA	Transcriptional regulator; involved in regulation of gluconeogenesis and fermentable carbon utilization; GFP-fusion protein localizes to cytoplasm, nucleus; null mutation affects periodicity of transcriptional and metabolic oscillation; plays role in restricting Ty1 transposition; member of the zinc cluster family of proteins, similar to Rds2p	NA	carbohydrate metabolic process_response to chemical_transcription from RNA polymerase II promoter	NA	yetfasco	DNA	other	0	53
YGL071W	AFT1	-0.292979	-0.773488	-0.793337	-0.747153	-0.858679	0.555077	0.742496	0.913857	0.177407	0.649276	Transcription factor involved in iron utilization and homeostasis; binds consensus site PyPuCACCCPu and activates transcription in response to changes in iron availability; in iron-replete conditions localization is regulated by Grx3p, Grx4p, and Fra2p, and promoter binding is negatively regulated via Grx3p-Grx4p binding; AFT1 has a paralog, AFT2, that arose from the whole genome duplication; rel…	NA	chromosome segregation_ion transport_lipid metabolic process_meiotic cell cycle_mitotic cell cycle_organelle fission_regulation of transport_response to starvation_transcription from RNA polymerase II promoter	NA	yetfasco	DNA	other	0	54
YDR216W	ADR1	0.571687	-0.433799	-0.658304	-0.681244	-0.338321	0.668924	0.174127	0.0875623	0.197402	0.834847	Carbon source-responsive zinc-finger transcription factor; required for transcription of the glucose-repressed gene ADH2, of peroxisomal protein genes, and of genes required for ethanol, glycerol, and fatty acid utilization	NA	chromatin organization_lipid metabolic process_monocarboxylic acid metabolic process_peroxisome organization_regulation of organelle organization_response to chemical_transcription from RNA polymerase II promoter	NA	yetfasco	DNA	other	0	55
YER159C	BUR6	0.462287	1.90025	1.53059	1.51727	0.780266	0.826924	0.106414	0.234817	0.238122	0.466091	Subunit of a heterodimeric NC2 transcription regulator complex; complex binds to TBP and can repress transcription by preventing preinitiation complex assembly or stimulate activated transcription; homologous to human NC2alpha; complex also includes Ncb2p; bur6 ncb2 double mutation is functionally complemented by coexpression of human DRAP1 and DR1, although the single bur6 mutation is not comple…	NC2 complex	DNA-templated transcription, initiation_response to heat_transcription from RNA polymerase II promoter	NA	NA	DNA	other	3	56
YDR397C	NCB2	0.72101	1.35287	1.43085	1.37895	0.688816	0.161596	0.0332124	0.132226	0.278648	0.193261	Subunit of a heterodimeric NC2 transcription regulator complex; complex binds to TBP and can repress transcription by preventing preinitiation complex assembly or stimulate activated transcription; homologous to human NC2beta; complex also includes Bur6p	NC2 complex	DNA-templated transcription, initiation_protein complex biogenesis_response to heat_transcription from RNA polymerase II promoter_transcription from RNA polymerase III promoter	NA	NA	DNA	other	3	57
YNL330C	RPD3	-0.839238	-0.0266714	0.00898806	0.000765117	0.192782	1.91854	0.157051	0.215164	0.31821	0.25505	Histone deacetylase, component of both the Rpd3S and Rpd3L complexes; regulates transcription, silencing, autophagy and other processes by influencing chromatin remodeling; forms at least two different complexes which have distinct functions and members; Rpd3(L) recruitment to the subtelomeric region is regulated by interaction with the arginine methyltransferase, Hmt1p	Rpd3L complex_Rpd3S complex	DNA recombination_DNA replication_DNA-templated transcription, elongation_chromatin organization_histone modification_meiotic cell cycle_mitotic cell cycle_nucleus organization_organelle fission_regulation of DNA metabolic process_regulation of cell cycle_regulation of organelle organization_transcription from RNA polymerase I promoter_transcription from RNA polymerase II promoter	NA	NA	DNA	other	3	58
YOL004W	SIN3	0.303473	0.852913	1.16688	1.13696	0.185888	0.224843	0.209549	0.116349	0.0684768	0.519808	Component of both the Rpd3S and Rpd3L histone deacetylase complexes; involved in transcriptional repression and activation of diverse processes, including mating-type switching and meiosis; involved in the maintenance of chromosomal integrity	Rpd3L complex_Rpd3S complex	DNA repair_DNA replication_cellular response to DNA damage stimulus_chromatin organization_histone modification_meiotic cell cycle_mitotic cell cycle_regulation of DNA metabolic process_response to heat_transcription from RNA polymerase I promoter_transcription from RNA polymerase II promoter	NA	NA	DNA	other	3	59
YPL139C	UME1	-0.861906	0.0900281	0.23016	0.354865	-0.483281	0.485533	0.218657	0.322362	0.251411	0.718596	Component of both the Rpd3S and Rpd3L histone deacetylase complexes; negative regulator of meiosis; required for repression of a subset of meiotic genes during vegetative growth, binding of histone deacetylase Rpd3p required for activity, contains a NEE box and a WD repeat motif; homologous with Wtm1p; UME1 has a paralog, WTM2, that arose from the whole genome duplication	Rpd3L complex_Rpd3S complex	chromatin organization_meiotic cell cycle_organelle fission_regulation of cell cycle_regulation of organelle organization_transcription from RNA polymerase I promoter_transcription from RNA polymerase II promoter	NA	yetfasco	DNA	other	3	60
YMR053C	STB2	0.0275387	-0.501311	-0.651475	-0.325812	-0.350386	0.617023	0.581797	0.195467	0.302665	0.656338	Protein that interacts with Sin3p in a two-hybrid assay; part of a large protein complex with Sin3p and Stb1p; STB2 has a paralog, STB6, that arose from the whole genome duplication	NA	biological_process	NA	yetfasco	other	other	0	61
YGL131C	SNT2	-0.280021	-0.752735	-0.27185	-0.411352	0.110268	0.44842	0.243197	0.531996	0.0798684	0.296691	Subunit of Snt2C complex, RING finger ubiquitin ligase (E3); physically associates with Ecm5p and Rpd3p; along with Ecm5p, recruits Rpd3p to small number of promoters; colocalizes with Ecm5p, independently of Rpd3p, to promoters of stress response genes upon oxidative stress; involved in ubiquitylation, degradation of excess histones; interacts with Ubc4p; role in regulating genes encoding amine …	NA	chromatin organization_histone modification_protein modification by small protein conjugation or removal_response to chemical_response to oxidative stress_transcription from RNA polymerase II promoter	NA	yetfasco	DNA	other	0	62
YMR176W	ECM5	-0.732144	-0.969902	-0.673692	-0.946927	-0.97268	0.527539	1.1567	0.819544	0.885893	0.822999	Subunit of the Snt2C complex; physically associates with Snt2p and Rpd3p; along with Snt2p, recruits Rpd3p to a small number of promoters; also colocalizes with Snt2p, independently of Rpd3p, to promoters of stress response genes in response to oxidative stress; contains ATP/GTP-binding site motif A; null mutant exhibits increased cellular volume, large drooping buds with elongated necks; relativ…	NA	response to chemical_response to oxidative stress	NA	NA	other	other	0	63
YKL185W	ASH1	-0.282528	-0.667308	-0.52656	-0.403058	-0.610197	0.262381	0.361467	0.509014	0.197579	0.684653	Component of the Rpd3L histone deacetylase complex; zinc-finger inhibitor of HO transcription; mRNA is localized and translated in the distal tip of anaphase cells, resulting in accumulation of Ash1p in daughter cell nuclei and inhibition of HO expression; potential Cdc28p substrate	Rpd3L complex	mitotic cell cycle_pseudohyphal growth_regulation of cell cycle_transcription from RNA polymerase II promoter	NA	yetfasco	DNA	other	0	64
YIL084C	SDS3	-1.15908	-0.30453	-0.277625	-0.590829	-0.218821	NA	0.197129	0.738968	0.227991	0.488215	Component of the Rpd3L histone deacetylase complex; required for its structural integrity and catalytic activity, involved in transcriptional silencing and required for sporulation; relocalizes to the cytosol in response to hypoxia; cells defective in SDS3 display pleiotropic phenotypes	Rpd3L complex	chromatin organization_histone modification_invasive growth in response to glucose limitation_response to heat_transcription from RNA polymerase II promoter	NA	NA	DNA	other	0	65
YMR263W	SAP30	-0.404532	-0.120028	-0.131439	0.104639	-0.287539	0.888762	0.269406	0.10072	0.520757	0.563651	Component of Rpd3L histone deacetylase complex; involved in silencing at telomeres, rDNA, and silent mating-type loci; involved in telomere maintenance	Rpd3L complex	chromatin organization_invasive growth in response to glucose limitation_response to heat_transcription from RNA polymerase I promoter_transcription from RNA polymerase II promoter	NA	NA	DNA	other	3	66
YNL097C	PHO23	-0.60981	-0.16965	-0.250902	-0.031926	-0.33708	1.21238	0.21487	0.245542	0.410917	0.815112	Component of the Rpd3L histone deacetylase complex; involved in transcriptional regulation of PHO5; affects termination of snoRNAs and cryptic unstable transcripts (CUTs); C-terminus shares significant sequence identity with the human candidate tumor suppressor p33-ING1 and its isoform ING3	Rpd3L complex	chromatin organization_invasive growth in response to glucose limitation_response to heat_transcription from RNA polymerase I promoter_transcription from RNA polymerase II promoter	NA	NA	DNA	other	3	67
YBR095C	RXT2	-0.197442	0.274382	0.287577	0.430032	-0.120782	0.386852	0.076207	0.345928	0.178939	0.835782	Component of the histone deacetylase Rpd3L complex; possibly involved in cell fusion and invasive growth; relocalizes to the cytosol in response to hypoxia	Rpd3L complex	chromatin organization_conjugation_invasive growth in response to glucose limitation_transcription from RNA polymerase II promoter	NA	NA	DNA	other	3	68
YDL076C	RXT3	-0.272898	0.132848	0.182258	0.428511	-0.135915	0.351747	0.0262145	0.305943	0.23241	0.812527	Component of the Rpd3L histone deacetylase complex; involved in histone deacetylation; protein abundance increases in response to DNA replication stress	Rpd3L complex	transcription from RNA polymerase I promoter	NA	NA	DNA	other	3	69
YPL181W	CTI6	-0.979511	0.529545	0.113615	0.501324	-0.17069	1.28031	0.181375	0.351158	0.0402942	0.299343	Component of the Rpd3L histone deacetylase complex; relieves transcriptional repression by binding to the Cyc8p-Tup1p corepressor and recruiting the SAGA complex to the repressed promoter; contains a PHD finger domain	Rpd3L complex	DNA replication_chromatin organization_regulation of DNA metabolic process	NA	NA	DNA	other	3	70
YDR207C	UME6	0.124484	-0.0546454	-0.0210046	0.0905283	0.191892	0.927687	0.167463	0.157158	0.223063	0.303726	Rpd3L histone deacetylase complex subunit; key transcriptional regulator of early meiotic genes; involved in chromatin remodeling and transcriptional repression via DNA looping; binds URS1 upstream regulatory sequence, represses transcription by recruiting conserved histone deacetylase Rpd3p (through co-repressor Sin3p) and chromatin-remodeling factor Isw2p; couples metabolic responses to nutriti…	Ume6p/Ime1p complex_Rpd3L complex	carbohydrate metabolic process_chromatin organization_lipid metabolic process_meiotic cell cycle_organelle fission_pseudohyphal growth_regulation of cell cycle_regulation of organelle organization_response to chemical_transcription from RNA polymerase II promoter	NA	yetfasco	DNA	other	3	71
YMR075W	RCO1	0.325154	-0.0886408	-0.231273	-0.0718028	-0.426433	0.152153	0.212457	0.053668	0.262895	0.0906066	Essential component of the Rpd3S histone deacetylase complex; interacts with Eaf3p	Rpd3S complex	DNA replication_DNA-templated transcription, elongation_chromatin organization_histone modification_regulation of DNA metabolic process_transcription from RNA polymerase II promoter	NA	yetfasco	DNA	other	0	72
YPR023C	EAF3	-0.349096	-0.657284	-0.328228	-0.540257	-0.528596	1.29391	0.0925387	0.12043	0.190933	0.678362	Component of the Rpd3S histone deacetylase complex; Esa1p-associated factor, nonessential component of the NuA4 acetyltransferase complex, homologous to Drosophila dosage compensation protein MSL3; plays a role in regulating Ty1 transposition	NuA4 histone acetyltransferase complex_Rpd3S complex	DNA repair_DNA replication_DNA-templated transcription, elongation_cellular response to DNA damage stimulus_chromatin organization_histone modification_peptidyl-amino acid modification_protein acylation_regulation of DNA metabolic process_transcription from RNA polymerase II promoter	NA	NA	DNA	other	0	73
YPL127C	HHO1	-1.17392	0.278493	0.409587	0.416122	0.0476741	0.92287	0.504336	0.35008	0.365143	0.50844	Histone H1, linker histone with roles in meiosis and sporulation; decreasing levels early in sporulation may promote meiosis, and increasing levels during sporulation facilitate compaction of spore chromatin; binds to promoters and within genes in mature spores; may be recruited by Ume6p to promoter regions, contributing to transcriptional repression outside of meiosis; suppresses DNA repair invo…	NA	DNA recombination_chromatin organization_regulation of DNA metabolic process	NA	NA	DNA	other	3	74
YDR174W	HMO1	0.685875	1.40383	1.64676	2.00073	1.13266	0.929187	0.607284	0.793877	0.768016	0.301506	Chromatin associated high mobility group (HMG) family member; involved in compacting, bending, bridging and looping DNA; rDNA-binding component that regulates transcription from RNA polymerase I promoters; regulates start site selection of ribosomal protein genes via RNA polymerase II promoters; role in genome maintenance; associates with a 5'-3' DNA helicase and Fpr1p, a prolyl isomerase; reloca…	NA	DNA-templated transcription, initiation_transcription from RNA polymerase I promoter_transcription from RNA polymerase II promoter	NA	yetfasco	DNA	other	3	75
YER161C	SPT2	1.4067	0.171458	-0.114924	-0.120573	-0.150228	0.826384	0.352195	0.220964	0.505944	0.718533	Protein involved in negative regulation of transcription; required for RNA polyadenylation; exhibits regulated interactions with both histones and SWI-SNF components; relocalizes to the cytosol in response to hypoxia; similar to mammalian HMG1 proteins	NA	DNA-templated transcription, elongation_chromatin organization_transcription from RNA polymerase II promoter	NA	yetfasco	DNA	other	3	76
YPL082C	MOT1	0.967018	1.54834	1.46813	1.53548	0.114602	0.752923	0.257702	0.279602	0.194214	0.42987	Essential protein involved in regulation of transcription; removes Spt15p (TBP) from DNA via its C-terminal ATPase activity; may have a role in ensuring that soluble TBP is available to bind TATA-less promoters; forms a complex with TBP that binds TATA DNA with high affinity but with altered specificity; the Mot1p-Spt15p-DNA ternary complex contains unbent DNA	Mot1p complex	DNA-templated transcription, initiation_protein complex biogenesis_rRNA processing_transcription from RNA polymerase I promoter_transcription from RNA polymerase II promoter	NA	NA	RNA	other	3	77
YMR039C	SUB1	-0.137805	0.866456	0.488766	0.27635	0.0349161	2.05993	0.30636	0.52469	0.153589	0.244478	Transcriptional regulator; facilitates elongation through factors that modify RNAP II; role in peroxide resistance involving Rad2p; role in nonhomologous end-joining (NHEJ) of ds breaks in plasmid DNA, but not chromosomal DNA; role in the hyperosmotic stress response through polymerase recruitment at RNAP II and RNAP III genes; negatively regulates sporulation; protein abundance increases in resp…	NA	DNA repair_DNA-templated transcription, elongation_DNA-templated transcription, initiation_DNA-templated transcription, termination_cellular response to DNA damage stimulus_meiotic cell cycle_regulation of cell cycle_response to chemical_response to osmotic stress_sporulation_transcription from RNA polymerase II promoter_transcription from RNA polymerase III promoter	NA	NA	DNA	other	3	78
YLR226W	BUR2	0.0168567	0.195884	0.38073	0.240575	0.248666	1.14531	0.0847193	0.444483	0.173444	0.0875311	Cyclin for the Sgv1p (Bur1p) protein kinase; Sgv1p and Bur2p comprise the CDK-cyclin BUR kinase complex which is involved in transcriptional regulation through its phosphorylation of the carboxy-terminal domain (CTD) of the largest subunit of RNA polymerase II (Rpo21p); BUR kinase is also involved in the recruitment of Spt6p to the CTD at the onset of transcription	Sgv1p/Bur2p complex	DNA-templated transcription, termination_chromatin organization_chromosome segregation_histone modification_mitotic cell cycle_organelle fission_peptidyl-amino acid modification_protein alkylation_protein modification by small protein conjugation or removal_protein phosphorylation_regulation of protein modification process_transcription from RNA polymerase II promoter	NA	NA	DNA	other	3	79
YPR161C	SGV1	0.945292	0.150235	0.139231	0.178529	0.298141	0.495004	0.186835	0.104355	0.246302	0.465807	Cyclin (Bur2p)-dependent protein kinase; part of the BUR kinase complex which functions in transcriptional regulation; phosphorylates the carboxy-terminal domain (CTD) of Rpo21p and the C-terminal repeat domain of Spt5p; recruits Spt6p to the CTD at the onset of transcription; regulated by Cak1p; similar to metazoan CDK9 proteins	Sgv1p/Bur2p complex	DNA-templated transcription, elongation_chromatin organization_histone modification_peptidyl-amino acid modification_protein alkylation_protein phosphorylation_regulation of protein modification process_transcription from RNA polymerase II promoter	NA	NA	DNA	other	3	80
YCR084C	TUP1	0.28543	0.579828	0.945621	0.597894	0.00251899	0.422017	0.258182	0.374839	0.330634	0.307643	General repressor of transcription; forms complex with Cyc8p, involved in the establishment of repressive chromatin structure through interactions with histones H3 and H4, appears to enhance expression of some genes	Sko1p/Cyc8p/Tup1 repressor complex_Tup1p/Ssn6p complex	cellular response to DNA damage stimulus_chromatin organization_invasive growth in response to glucose limitation_lipid metabolic process_monocarboxylic acid metabolic process_regulation of transport_response to chemical_transcription from RNA polymerase II promoter	NA	NA	DNA	other	3	81
YBR112C	CYC8	0.570518	0.835916	0.473866	0.111944	-0.567678	NA	NA	NA	NA	NA	General transcriptional co-repressor; acts together with Tup1p; also acts as part of a transcriptional co-activator complex that recruits the SWI/SNF and SAGA complexes to promoters; can form the prion [OCT+]	Sko1p/Cyc8p/Tup1 repressor complex_Tup1p/Ssn6p complex	cellular response to DNA damage stimulus_chromatin organization_lipid metabolic process_monocarboxylic acid metabolic process_regulation of transport_transcription from RNA polymerase II promoter	NA	NA	DNA	other	3	82
YKL005C	BYE1	-0.133873	-0.420276	-0.0184848	-0.482364	0.0595548	0.988523	0.472479	0.197604	0.335019	0.131436	Negative regulator of transcription elongation; contains a TFIIS-like domain that associates with chromatin and a PHD domain that interacts with H3K4me3; multicopy suppressor of temperature-sensitive ess1 mutations, binds RNA polymerase II large subunit	NA	transcription from RNA polymerase II promoter	NA	yetfasco	DNA	other	3	83
YKL058W	TOA2	-0.443483	-0.225367	-0.33246	-0.114853	-0.598538	NA	NA	NA	NA	NA	TFIIA small subunit; involved in transcriptional activation, acts as antirepressor or as coactivator; required, along with Toa1p, for ribosomal protein gene transcription in vivo; homologous to smallest subunit of human and Drosophila TFIIA; protein abundance increases in response to DNA replication stress	transcription factor TFIIA complex	DNA-templated transcription, initiation_transcription from RNA polymerase II promoter	TFIIA	NA	DNA	TFII	0	84
YPR086W	SUA7	2.56332	2.22058	1.88133	1.55772	0.727253	0.130521	0.330134	0.462536	0.622936	0.191049	Transcription factor TFIIB; a general transcription factor required for transcription initiation and start site selection by RNA polymerase II	NA	DNA-templated transcription, initiation_transcription from RNA polymerase II promoter	TFIIB	yetfasco	DNA	other	4	85
YDR167W	TAF10	-0.524237	-0.0224118	0.030169	-0.289217	0.179782	0.551248	0.321558	0.113084	0.235041	0.324242	Subunit (145 kDa) of TFIID and SAGA complexes; involved in RNA polymerase II transcription initiation and in chromatin modification	transcription factor TFIID complex_SAGA complex_SLIK (SAGA-like) complex	DNA-templated transcription, initiation_chromatin organization_histone modification_peptidyl-amino acid modification_protein acylation_transcription from RNA polymerase II promoter	TFIID	NA	DNA	TFII	0	86
YDL070W	BDF2	-0.347253	0.147424	0.0766647	0.220055	0.124383	0.772572	0.215519	0.425705	0.0842582	0.225653	Protein involved in transcription initiation; acts at TATA-containing promoters; associates with the basal transcription factor TFIID; contains two bromodomains; corresponds to the C-terminal region of mammalian TAF1; redundant with Bdf1p; protein abundance increases in response to DNA replication stress; BDF2 has a paralog, BDF1, that arose from the whole genome duplication	NA	chromatin organization_regulation of organelle organization	NA	NA	DNA	other	0	87
YML098W	TAF13	0.50285	-0.0524764	0.286805	0.188009	-0.00892237	0.322495	0.200143	0.0645804	0.445617	0.779274	TFIID subunit (19 kDa); involved in RNA polymerase II transcription initiation, similar to histone H4 with atypical histone fold motif of Spt3-like transcription factors	transcription factor TFIID complex	DNA-templated transcription, initiation_transcription from RNA polymerase II promoter	TFIID	NA	DNA	TFII	4	88
YDR145W	TAF12	-0.0375244	0.669094	0.18021	0.384932	0.2413	0.490205	0.124741	0.33359	0.25899	0.644008	Subunit (61/68 kDa) of TFIID and SAGA complexes; involved in RNA polymerase II transcription initiation and in chromatin modification, similar to histone H2A	transcription factor TFIID complex_SAGA complex_SLIK (SAGA-like) complex	DNA-templated transcription, initiation_chromatin organization_histone modification_peptidyl-amino acid modification_protein acylation_transcription from RNA polymerase II promoter	TFIID	NA	DNA	TFII	4	89
YGR274C	TAF1	-0.0517976	0.359338	0.305376	0.267975	-0.258025	0.44904	0.101328	0.293114	0.280679	0.346351	TFIID subunit, involved in RNA pol II transcription initiation; possesses in vitro histone acetyltransferase activity but its role in vivo appears to be minor; involved in promoter binding and G1/S progression; relocalizes to the cytosol in response to hypoxia	transcription factor TFIID complex	DNA-templated transcription, initiation_transcription from RNA polymerase II promoter	TFIID	NA	DNA	TFII	4	90
YCR042C	TAF2	0.33087	0.686648	0.577683	0.511857	-0.0438929	0.243103	0.154133	0.212234	0.257512	0.317673	TFIID subunit (150 kDa); involved in RNA polymerase II transcription initiation	transcription factor TFIID complex	DNA-templated transcription, initiation_transcription from RNA polymerase II promoter	TFIID	NA	DNA	TFII	4	91
YPL011C	TAF3	-0.128772	0.716973	0.229157	0.297662	-0.100074	0.507409	0.156356	0.248269	0.562978	0.099221	TFIID subunit (47 kDa); involved in promoter binding and RNA polymerase II transcription initiation	transcription factor TFIID complex	DNA-templated transcription, initiation_transcription from RNA polymerase II promoter	TFIID	NA	DNA	TFII	4	92
YMR005W	TAF4	0.537975	0.389774	0.34695	0.291725	0.250926	0.364006	0.242218	0.153844	0.241549	0.222659	TFIID subunit (48 kDa); involved in RNA polymerase II transcription initiation; potential Cdc28p substrate	transcription factor TFIID complex	DNA-templated transcription, initiation_transcription from RNA polymerase II promoter	TFIID	NA	DNA	TFII	4	93
YBR198C	TAF5	0.602606	0.462059	0.134114	0.465554	0.0625206	0.351824	0.159346	0.304279	0.312827	0.441982	Subunit (90 kDa) of TFIID and SAGA complexes; involved in RNA polymerase II transcription initiation and in chromatin modification	transcription factor TFIID complex_SAGA complex_SLIK (SAGA-like) complex	DNA-templated transcription, initiation_chromatin organization_histone modification_peptidyl-amino acid modification_protein acylation_transcription from RNA polymerase II promoter	TFIID	NA	DNA	TFII	4	94
YGL112C	TAF6	1.03282	0.966319	0.671925	0.730966	-0.116139	0.396026	0.15954	0.07844	0.104687	0.396462	Subunit (60 kDa) of TFIID and SAGA complexes; involved in transcription initiation of RNA polymerase II and in chromatin modification, similar to histone H4; relocalizes to the cytosol in response to hypoxia	transcription factor TFIID complex_SAGA complex_SLIK (SAGA-like) complex	DNA-templated transcription, initiation_chromatin organization_histone modification_peptidyl-amino acid modification_protein acylation_transcription from RNA polymerase II promoter	TFIID	NA	DNA	TFII	4	95
YMR227C	TAF7	0.578511	0.5318	0.317254	0.424941	0.14566	0.497072	0.27375	0.470443	0.670747	0.648175	TFIID subunit (67 kDa); involved in RNA polymerase II transcription initiation	transcription factor TFIID complex	DNA-templated transcription, initiation_transcription from RNA polymerase II promoter	TFIID	NA	DNA	TFII	4	96
YML114C	TAF8	0.844919	0.710683	0.502462	0.234288	0.0393622	0.279886	0.317451	0.156474	0.212646	0.206753	TFIID subunit (65 kDa); involved in RNA polymerase II transcription initiation	transcription factor TFIID complex	DNA-templated transcription, initiation_transcription from RNA polymerase II promoter	TFIID	NA	DNA	TFII	4	97
YMR236W	TAF9	0.922202	0.952843	0.686081	0.808129	0.444498	0.256316	0.091083	0.148442	0.187111	0.323523	Subunit (17 kDa) of TFIID and SAGA complexes; involved in RNA polymerase II transcription initiation and in chromatin modification, similar to histone H3	transcription factor TFIID complex_SAGA complex_SLIK (SAGA-like) complex	DNA-templated transcription, initiation_chromatin organization_histone modification_peptidyl-amino acid modification_protein acylation_transcription from RNA polymerase II promoter	TFIID	NA	DNA	TFII	4	98
YLR399C	BDF1	1.21676	1.53267	1.50488	1.53434	1.3028	0.563443	0.185428	0.0890425	0.172624	0.026067	Protein involved in transcription initiation; functions at TATA-containing promoters; associates with the basal transcription factor TFIID; contains two bromodomains; corresponds to the C-terminal region of mammalian TAF1; redundant with Bdf2p; BDF1 has a paralog, BDF2, that arose from the whole genome duplication	NA	DNA repair_cellular response to DNA damage stimulus_chromatin organization_regulation of organelle organization	NA	NA	DNA	other	4	99
YPL129W	TAF14	-0.195501	0.62667	0.340709	0.41148	-0.549525	NA	NA	NA	NA	NA	Subunit of TFIID, TFIIF, INO80, SWI/SNF, and NuA3 complexes; involved in RNA polymerase II transcription initiation and in chromatin modification; contains a YEATS domain	Ino80p complex_SWI/SNF complex_transcription factor TFIIF complex_NuA3 histone acetyltransferase complex_transcription factor TFIID complex	DNA-templated transcription, elongation_DNA-templated transcription, initiation_chromatin organization_histone modification_peptidyl-amino acid modification_protein acylation_transcription from RNA polymerase II promoter	TFIID_TFIIH	NA	DNA	TFII	0	100
YKL028W	TFA1	2.01043	2.02271	1.51048	1.58142	0.704198	0.443899	0.129304	0.208164	0.123524	0.191526	TFIIE large subunit; involved in recruitment of RNA polymerase II to the promoter, activation of TFIIH, and promoter opening	transcription factor TFIIE complex	DNA-templated transcription, initiation_transcription from RNA polymerase II promoter	TFIIE	NA	DNA	TFII	4	101
YKR062W	TFA2	1.78732	0.872657	0.808278	0.63563	0.318484	0.379789	0.63537	0.636875	1.13231	1.14959	TFIIE small subunit; involved in RNA polymerase II transcription initiation	transcription factor TFIIE complex	transcription from RNA polymerase II promoter	TFIIE	NA	DNA	TFII	4	102
YGR005C	TFG2	-0.37251	-0.492457	-0.306246	-0.152284	0.0370826	0.573692	0.714812	0.0915691	0.142714	0.259972	TFIIF (Transcription Factor II) middle subunit; involved in both transcription initiation and elongation of RNA polymerase II; homologous to human RAP30	transcription factor TFIIF complex	DNA-templated transcription, elongation_DNA-templated transcription, initiation_transcription from RNA polymerase II promoter	TFIIF	NA	DNA	TFII	0	103
YGR186W	TFG1	1.59427	1.57695	0.911956	1.05958	0.492213	0.224532	0.21	0.150628	0.29545	0.35223	TFIIF (Transcription Factor II) largest subunit; involved in both transcription initiation and elongation of RNA polymerase II; homologous to human RAP74	transcription factor TFIIF complex	DNA-templated transcription, elongation_DNA-templated transcription, initiation_protein dephosphorylation_regulation of protein modification process_transcription from RNA polymerase II promoter	TFIIF	NA	DNA	TFII	4	104
YOR352W	TFB6	-0.0373719	-0.429353	-0.111995	-0.0190392	-0.0267905	0.941873	0.379052	0.287242	0.156459	0.250302	Subunit of TFIIH complex; facilities dissociation of the Ssl2p helices from TFIIH; expression levels regulated by Arg5,6p; green fluorescent protein (GFP)-fusion protein localizes to the cytoplasm and nucleus	NA	biological_process	TFIIH	NA	other	other	0	105
YDR311W	TFB1	NA	NA	NA	NA	NA	NA	NA	NA	NA	NA	Subunit of TFIIH and nucleotide excision repair factor 3 complexes; required for nucleotide excision repair, target for transcriptional activators; relocalizes to the cytosol in response to hypoxia	transcription factor TFIIH complex_nucleotide-excision repair factor 3 complex	DNA repair_cellular response to DNA damage stimulus_protein phosphorylation_transcription from RNA polymerase I promoter_transcription from RNA polymerase II promoter	TFIIH	NA	DNA	TFII	0	106
YDR079C-A	TFB5	-0.267802	-0.138793	-0.0726929	-0.0423455	0.435569	1.19441	0.348263	0.591926	0.274237	0.822536	Component of RNA polymerase II general transcription factor TFIIH; involved in transcription initiation and in nucleotide-excision repair; relocalizes to the cytosol in response to hypoxia; homolog of Chlamydomonas reinhardtii REX1-S protein involved in DNA repair	transcription factor TFIIH complex	DNA repair_cellular response to DNA damage stimulus_protein phosphorylation_transcription from RNA polymerase II promoter	TFIIH	NA	DNA	TFII	4	107
YIL143C	SSL2	0.722578	1.2973	1.12099	1.13758	0.740554	0.217187	0.10775	0.176912	0.252265	0.231384	Component of RNA polymerase transcription factor TFIIH holoenzyme; acts as a dsDNA-dependent translocase in the context of TFIIH, allowing unwinding of promoter DNA; Ssl2p alone has DNA-dependent ATPase/helicase activity; interacts functionally with TFIIB and has roles in transcription start site selection and in gene looping to juxtapose initiation and termination regions; involved in DNA repair…	transcription factor TFIIH complex_nucleotide-excision repair factor 3 complex	DNA recombination_DNA repair_DNA-templated transcription, initiation_cellular response to DNA damage stimulus_nuclear transport_nucleobase-containing compound transport_protein phosphorylation_regulation of DNA metabolic process_transcription from RNA polymerase II promoter_transposition	TFIIH	NA	DNA	TFII	4	108
YLR005W	SSL1	1.40975	1.25013	1.00122	0.857871	0.410623	0.761394	0.390046	0.529929	0.642876	0.544839	Subunit of the core form of RNA polymerase transcription factor TFIIH; has both protein kinase and DNA-dependent ATPase/helicase activities; essential for transcription and nucleotide excision repair; interacts with Tfb4p	transcription factor TFIIH complex_nucleotide-excision repair factor 3 complex	DNA repair_cellular response to DNA damage stimulus_protein phosphorylation_transcription from RNA polymerase II promoter	TFIIH	NA	DNA	TFII	4	109
YPR025C	CCL1	0.855775	0.894592	0.471043	0.329217	-0.33964	0.487182	0.208056	0.561331	0.300422	0.882903	Cyclin associated with protein kinase Kin28p; Kin28p is the TFIIH-associated carboxy-terminal domain (CTD) kinase involved in transcription initiation at RNA polymerase II promoters; human homolog CCNH allows growth of yeast ccl1 temperature-sensitive mutant at restrictive temperature	transcription factor TFIIH complex	protein phosphorylation_transcription from RNA polymerase II promoter	TFIIH	NA	DNA	TFII	4	110
YER171W	RAD3	1.23651	1.63269	1.24777	1.10827	0.707756	0.73193	0.254479	0.38301	0.341779	0.240829	5' to 3' DNA helicase; involved in nucleotide excision repair and transcription; subunit of RNA polII initiation factor TFIIH and of Nucleotide Excision Repair Factor 3 (NEF3); homolog of human XPD protein; mutant has aneuploidy tolerance; protein abundance increases in response to DNA replication stress	transcription factor TFIIH complex_nucleotide-excision repair factor 3 complex	DNA recombination_DNA repair_cellular response to DNA damage stimulus_protein phosphorylation_regulation of DNA metabolic process_transcription from RNA polymerase II promoter_transposition	TFIIH	NA	DNA	TFII	4	111
YDL108W	KIN28	0.974493	0.892752	0.426956	0.393503	-0.418578	0.95014	0.366354	0.973469	0.786205	0.6694	Serine/threonine protein kinase, subunit of transcription factor TFIIH; involved in transcription initiation at RNA polymerase II promoters; phosphorylates Ser5 residue of the PolII C-terminal domain (CTD) at gene promoters; relocalizes to the cytosol in response to hypoxia	transcription factor TFIIH complex	DNA-templated transcription, elongation_mRNA processing_protein phosphorylation_transcription from RNA polymerase I promoter_transcription from RNA polymerase II promoter	TFIIH	NA	RNA	TFII	4	112
YPL122C	TFB2	1.08193	1.09276	0.993677	0.680504	0.47484	0.478963	0.645602	0.735089	0.678997	0.485819	Subunit of TFIIH and nucleotide excision repair factor 3 complexes; involved in transcription initiation, required for nucleotide excision repair, similar to 52 kDa subunit of human TFIIH	transcription factor TFIIH complex_nucleotide-excision repair factor 3 complex	DNA repair_cellular response to DNA damage stimulus_protein phosphorylation_transcription from RNA polymerase II promoter	TFIIH	NA	DNA	TFII	4	113
YDR460W	TFB3	1.29326	1.43844	1.03502	0.685309	0.136474	0.219609	0.0747645	0.260886	0.242466	0.381301	Subunit of TFIIH and nucleotide excision repair factor 3 complexes; involved in transcription initiation, required for nucleotide excision repair; ring finger protein similar to mammalian CAK and TFIIH subunit	transcription factor TFIIH complex	DNA repair_cellular response to DNA damage stimulus_protein phosphorylation_transcription from RNA polymerase II promoter	TFIIH	NA	DNA	TFII	4	114
YPR056W	TFB4	1.75266	1.4581	1.15596	0.7696	0.130904	0.154401	0.599339	0.497464	0.924866	0.657514	Subunit of TFIIH complex; involved in transcription initiation, similar to 34 kDa subunit of human TFIIH; interacts with Ssl1p	transcription factor TFIIH complex_nucleotide-excision repair factor 3 complex	DNA repair_cellular response to DNA damage stimulus_protein phosphorylation_transcription from RNA polymerase II promoter	TFIIH	NA	DNA	TFII	4	115
YAL001C	TFC3	0.372462	-0.398336	-0.331614	-0.528122	-0.684005	0.193472	0.173523	0.349432	0.269155	0.219581	Subunit of RNA polymerase III transcription initiation factor complex; part of the TauB domain of TFIIIC that binds DNA at the BoxB promoter sites of tRNA and similar genes; cooperates with Tfc6p in DNA binding; largest of six subunits of the RNA polymerase III transcription initiation factor complex (TFIIIC)	transcription factor TFIIIC complex	transcription from RNA polymerase III promoter	NA	NA	other	TFII	0	116
YGL122C	NAB2	1.03889	1.02861	1.24899	1.02906	1.00296	0.547385	0.0855993	0.103538	0.168693	0.199542	Nuclear polyadenylated RNA-binding protein; required for nuclear mRNA export and poly(A) tail length control; stimulates RNA polymerase III transcription by enhancing TFIIIB binding to promoters; protects mRNA against decay by the nuclear exosome in a poly(A)-tail-dependent manner; involved in forming export-competent mRNPs in the nucleus; autoregulates mRNA levels; NLS binds Kap104p; protein abu…	NA	RNA catabolic process_mRNA processing_nuclear transport_nucleobase-containing compound transport_transcription from RNA polymerase III promoter	NA	NA	RNA	other	5	117
YGL044C	RNA15	0.363672	0.32627	0.20646	0.159538	-0.023238	0.431209	0.244457	0.268562	0.115556	0.28871	Component of the cleavage and polyadenylation factor I (CF I); CF 1, composed of the CF 1A complex (Rna14p, Rna15p, Clp1p, Pcf11p) and Hrp1, is involved in cleavage and polyadenylation of mRNA 3' ends; interacts with the A-rich polyadenylation signal in complex with Rna14p and Hrp1p; mutant displays reduced transcription elongation in the G-less-based run-on (GLRO) assay; required for gene loopin…	mRNA cleavage factor complex (CFI)	mRNA processing	NA	NA	RNA	CPA/termination	5	118
YOR048C	RAT1	1.4078	0.852413	0.975926	0.850498	-0.271963	0.364513	0.207941	0.437054	0.213041	0.345614	Nuclear 5' to 3' single-stranded RNA exonuclease; involved in RNA metabolism, including rRNA and snoRNA processing, as well as poly (A+) dependent and independent mRNA transcription termination; required for cotranscriptional pre-rRNA cleavage; displaces Cdk1p from elongating transcripts, especially as RNAPII reaches the poly(A) site, negatively regulates phosphorylation of the CTD of RNAPII, and…	RNA Degradation Complex	DNA-templated transcription, elongation_DNA-templated transcription, termination_RNA catabolic process_protein phosphorylation_rRNA processing_regulation of protein modification process_ribosomal large subunit biogenesis_snoRNA processing_transcription from RNA polymerase II promoter	NA	NA	RNA	other	5	119
YNL251C	NRD1	-0.05634	1.06106	0.882627	0.83309	0.447851	0.183207	0.151379	0.375454	0.194791	0.100197	RNA-binding subunit of Nrd1 complex; complex interacts with exosome to mediate 3'-end formation of some mRNAs, snRNAs, snoRNAs, and CUTs; interacts with CTD of RNA pol II large subunit Rpo21p at phosphorylated Ser5 to direct transcription termination of non-polyadenylated transcripts; H3K4 trimethylation of transcribed regions by Set1p enhances recruitment of Nrd1p to those sites; role in regulat…	NA	DNA-templated transcription, termination_RNA catabolic process_mRNA processing_snoRNA processing_tRNA processing_transcription from RNA polymerase II promoter	NA	NA	RNA	other	5	120
YPL190C	NAB3	0.890892	0.93069	0.64319	0.409428	-0.460725	0.0938351	0.216791	0.139568	0.196535	0.619936	RNA-binding protein, subunit of Nrd1 complex (Nrd1p-Nab3p-Sen1p); complex interacts with exosome to mediate 3'-end formation of some mRNAs, snRNAs, snoRNAs, and CUTs; required for termination of non-poly(A) transcripts and efficient splicing; Nrd1-Nab3 pathway appears to have a role in rapid suppression of some genes when cells are shifted to poor growth conditions, indicating role for Nrd1-Nab3 …	NA	DNA-templated transcription, termination_RNA catabolic process_mRNA processing_snoRNA processing_tRNA processing_transcription from RNA polymerase II promoter	NA	NA	RNA	other	5	121
YER165W	PAB1	-0.142288	-0.437515	-0.204355	-0.292018	0.48903	1.61529	0.424979	0.508373	0.265835	0.620695	Poly(A) binding protein; part of the 3'-end RNA-processing complex, mediates interactions between the 5' cap structure and the 3' mRNA poly(A) tail, involved in control of poly(A) tail length, interacts with translation factor eIF-4G; stimulates, but is not required for the deadenylation activity of the Pan2p-Pan3p poly(A)-ribonuclease complex	NA	RNA catabolic process_regulation of translation_translational initiation	NA	NA	RNA	other	0	122
YNL016W	PUB1	-0.221284	0.118336	0.0297534	-0.172327	-0.194783	0.247253	0.131531	0.152831	0.602434	0.0744789	Poly (A)+ RNA-binding protein; abundant mRNP-component protein that binds mRNA and is required for stability of many mRNAs; component of glucose deprivation induced stress granules, involved in P-body-dependent granule assembly; protein abundance increases in response to DNA replication stress	NA	RNA catabolic process_organelle assembly	NA	NA	RNA	other	5	123
YCL011C	GBP2	-0.441338	-0.163415	-0.251268	-0.0936863	0.360972	0.525077	0.107756	0.318146	0.468642	0.337054	Poly(A+) RNA-binding protein; key surveillance factor for the selective export of spliced mRNAs from the nucleus to the cytoplasm; preference for intron-containing genes; similar to Npl3p; also binds single-stranded telomeric repeat sequence in vitro; relocalizes to the cytosol in response to hypoxia; GBP2 has a paralog, HRB1, that arose from the whole genome duplication	NA	RNA catabolic process_nuclear transport_nucleobase-containing compound transport_telomere organization	NA	NA	RNA	other	5	124
YNL004W	HRB1	-0.159989	-0.0774172	0.0839769	0.159245	0.134338	1.86759	0.301932	0.160249	0.1175	0.351856	Poly(A+) RNA-binding protein; key surveillance factor for the selective export of spliced mRNAs from the nucleus to the cytoplasm; preference for intron-containing genes; similar to Npl3p; HRB1 has a paralog, GBP2, that arose from the whole genome duplication	NA	RNA catabolic process_nuclear transport_nucleobase-containing compound transport	NA	NA	RNA	other	5	125
YKL018W	SWD2	-0.17141	-0.40358	-0.0800224	-0.309721	-0.0767834	0.21608	0.104923	0.511741	0.0509243	0.171468	Subunit of the COMPASS (Set1C) histone H3K4 methyltransferase complex; required for Set1C stability and optimal activity; COMPASS methylates histone H3 on lys 4 and is involved in telomeric silencing; subunit of CPF (cleavage and polyadenylation factor), a complex involved in RNAP II transcription termination	mRNA cleavage and polyadenylation specificity factor complex_COMPASS complex	DNA-templated transcription, termination_chromatin organization_histone modification_mRNA processing_peptidyl-amino acid modification_protein alkylation_snoRNA processing_telomere organization_transcription from RNA polymerase II promoter	NA	NA	RNA	CPA/termination	0	126
YNL112W	DBP2	1.63388	1.32734	0.678781	0.527612	0.908464	0.842492	0.282631	0.120417	0.18911	0.759476	ATP-dependent RNA helicase of the DEAD-box protein family; has strong preference for dsRNA; interacts with YRA1; required for assembly of Yra1p, Nab2p and Mex67p onto mRNA and formation of nuclear mRNP; involved in mRNA decay and rRNA processing; may be involved in suppression of transcription from cryptic initiation sites	NA	RNA catabolic process_rRNA processing	NA	NA	RNA	other	5	127
YDR289C	RTT103	0.941968	0.619509	0.487452	0.324236	-0.465005	0.361709	0.201976	0.383285	0.3866	0.326643	Protein involved in transcription termination by RNA polymerase II; interacts with exonuclease Rat1p and Rai1p; has an RPR domain (carboxy-terminal domain interacting domain); also involved in regulation of Ty1 transposition	RNA Degradation Complex	cellular response to DNA damage stimulus_mRNA processing_transposition	NA	NA	RNA	other	5	128
YDR228C	PCF11	-0.183727	-0.0854991	-0.272555	-0.24017	-0.474548	0.847067	0.188949	0.30697	0.128228	0.449565	mRNA 3' end processing factor; essential component of cleavage and polyadenylation factor IA (CF IA), involved in pre-mRNA 3' end processing and in transcription termination; binds C-terminal domain of largest subunit of RNA pol II (Rpo21p); required for gene looping; relocalizes to the cytosol in response to hypoxia	mRNA cleavage factor complex (CFI)	DNA-templated transcription, termination_mRNA processing_transcription from RNA polymerase II promoter	NA	NA	RNA	CPA/termination	5	129
YMR061W	RNA14	-1.44782	0.138307	0.0117918	0.0777315	-0.254859	0.697793	0.245985	0.102031	0.291077	0.423935	Component of the cleavage and polyadenylation factor I (CF I); CF 1, composed of the CF 1A complex (Rna14p, Rna15p, Clp1p, Pcf11p) and Hrp1, is involved in cleavage and polyadenylation of mRNA 3' ends; bridges interaction between Rna15p and Hrp1p in the CF I complex; mutant displays reduced transcription elongation in the G-less-based run-on (GLRO) assay; required for gene looping and maintenance…	mRNA cleavage factor complex (CFI)	mRNA processing	NA	NA	RNA	CPA/termination	5	130
YLR115W	CFT2	-0.445181	-0.365159	-0.40495	-0.339724	-0.926979	0.233541	0.460359	0.472335	0.553482	0.887298	Subunit of the mRNA cleavage and polyadenlylation factor (CPF); required for pre-mRNA cleavage, polyadenylation and poly(A) site recognition, 43% similarity with the mammalian CPSF-100 protein.	mRNA cleavage and polyadenylation specificity factor complex	mRNA processing	NA	NA	RNA	CPA/termination	5	131
YDR195W	REF2	-0.545179	0.0234674	-0.0957921	0.0877432	-0.120717	0.781381	0.350746	0.141193	0.141141	0.557574	RNA-binding protein; involved in the cleavage step of mRNA 3'-end formation prior to polyadenylation, and in snoRNA maturation; part of holo-CPF subcomplex APT, which associates with 3'-ends of snoRNA- and mRNA-encoding genes; relocalizes to the cytosol in response to hypoxia	mRNA cleavage and polyadenylation specificity factor complex	DNA-templated transcription, termination_cytokinesis_cytoskeleton organization_mRNA processing_mitotic cell cycle_protein dephosphorylation_regulation of cell cycle_regulation of organelle organization_snoRNA processing_transcription from RNA polymerase II promoter	NA	NA	RNA	CPA/termination	5	132
YNL317W	PFS2	-0.0680299	0.0296084	0.0537976	-0.00450048	0.243675	1.24478	0.0993278	0.167683	0.13218	0.508496	Integral subunit of the pre-mRNA CPF complex; the cleavage and polyadenylation factor (CPF) complex plays an essential role in mRNA 3'-end formation by bridging different processing factors and thereby promoting the assembly of the processing complex	mRNA cleavage and polyadenylation specificity factor complex	mRNA processing	NA	NA	RNA	CPA/termination	5	133
YLR277C	YSH1	-0.478571	-0.581998	-0.420519	-0.453639	-0.147968	0.253232	0.870798	0.965148	0.820422	1.29073	Endoribonuclease; subunit of the mRNA cleavage and polyadenylation specificity complex; required for 3' processing, splicing, and transcriptional termination of mRNAs and snoRNAs; protein abundance increases in response to DNA replication stress; YSH1 has a paralog, SYC1, that arose from the whole genome duplication	mRNA cleavage and polyadenylation specificity factor complex	DNA-templated transcription, termination_RNA splicing_mRNA processing_snoRNA processing_transcription from RNA polymerase II promoter	NA	NA	RNA	CPA/termination	5	134
YGR156W	PTI1	0.382907	0.0846249	0.103839	0.192164	-0.112254	0.695755	0.138615	0.125961	0.107481	0.449165	Essential component of CPF (cleavage and polyadenylation factor); involved in 3' end formation of snoRNA and mRNA; interacts directly with Pta1p; relocalizes to the cytosol in response to hypoxia; similar to mammalian Cleavage-Stimulation Factor CstF-64	mRNA cleavage and polyadenylation specificity factor complex	DNA-templated transcription, termination_mRNA processing_snoRNA processing_transcription from RNA polymerase II promoter	NA	NA	RNA	CPA/termination	5	135
YKR002W	PAP1	0.288552	0.256658	0.164804	-0.178199	-0.431626	0.39951	0.193996	0.450127	0.131057	0.480009	Poly(A) polymerase; one of three factors required for mRNA 3'-end polyadenylation, forms multiprotein complex with polyadenylation factor I (PF I), also required for mRNA nuclear export; may also polyadenylate rRNAs; required for gene looping	mRNA cleavage and polyadenylation specificity factor complex	mRNA processing_snoRNA processing	NA	NA	RNA	CPA/termination	5	136
YJR093C	FIP1	-0.361243	-0.0780151	-0.0615873	0.00338921	-0.0310812	0.203607	0.136805	0.480436	0.412256	0.379954	Subunit of cleavage polyadenylation factor (CPF); interacts directly with poly(A) polymerase (Pap1p) to regulate its activity; bridging factor that links Pap1p and the CPF complex via Yth1p	mRNA cleavage and polyadenylation specificity factor complex	mRNA processing	NA	NA	RNA	CPA/termination	5	137
YDR301W	CFT1	-0.656404	-0.199926	0.0493791	-0.360876	-0.45152	0.98461	0.314724	0.302028	0.126619	0.218978	RNA-binding subunit of the mRNA cleavage and polyadenylation factor; involved in poly(A) site recognition and required for both pre-mRNA cleavage and polyadenylation, 51% sequence similarity with mammalian AAUAA-binding subunit of CPSF	mRNA cleavage and polyadenylation specificity factor complex	DNA-templated transcription, termination_mRNA processing_transcription from RNA polymerase II promoter	NA	NA	RNA	CPA/termination	5	138
YPR107C	YTH1	-1.12119	-0.0874751	-0.20604	-0.086888	0.188131	1.38219	0.249422	0.262362	0.286461	0.339783	Essential RNA-binding component of cleavage and polyadenylation factor; contains five zinc fingers; required for pre-mRNA 3'-end processing and polyadenylation; relocalizes to the cytosol in response to hypoxia	mRNA cleavage and polyadenylation specificity factor complex	mRNA processing	NA	NA	RNA	CPA/termination	5	139
YKL059C	MPE1	0.28287	-0.198795	-0.301828	-0.173889	-0.221199	0.606028	0.36609	0.192406	0.2805	0.248905	Essential conserved subunit of CPF cleavage and polyadenylation factor; plays a role in 3' end formation of mRNA via the specific cleavage and polyadenylation of pre-mRNA; contains a ubiquitin-like (UBL) domain, a RNA-binding zinc knuckle motif and a RING finger domain; both the zinc knuckle and RING finger are required for pre-mRNA binding; possible role in ubiquitination of Pap1p; relocalizes t…	mRNA cleavage and polyadenylation specificity factor complex	mRNA processing_protein modification by small protein conjugation or removal	NA	NA	RNA	CPA/termination	5	140
YLR430W	SEN1	-0.404872	-0.178019	-0.185455	-0.556486	-0.0174627	0.344601	0.305268	0.0349051	0.0925718	0.247004	Presumed helicase and subunit of the Nrd1 complex (Nrd1p-Nab3p-Sen1p); complex interacts with the exosome to mediate 3' end formation of some mRNAs, snRNAs, snoRNAs, and CUTs; has a separate role in coordinating DNA replication with transcription, by associating with moving replication forks and preventing errors that occur when forks encounter transcribed regions; homolog of Senataxin, which is …	NA	DNA repair_DNA replication_DNA-templated transcription, termination_cellular response to DNA damage stimulus_mRNA processing_rRNA processing_snoRNA processing_tRNA processing_transcription from RNA polymerase II promoter	NA	NA	RNA	other	5	141
YOR179C	SYC1	-1.2954	-0.0752348	-0.280353	0.0335955	-0.153863	0.604233	0.502959	0.0139125	0.146172	0.710013	Subunit of the APT subcomplex of cleavage and polyadenylation factor; may have a role in 3' end formation of both polyadenylated and non-polyadenylated RNAs; SYC1 has a paralog, YSH1, that arose from the whole genome duplication	mRNA cleavage and polyadenylation specificity factor complex	DNA-templated transcription, termination_transcription from RNA polymerase II promoter	NA	NA	DNA	CPA/termination	5	142
YJL006C	CTK2	-0.427631	-0.100591	0.20122	0.0740642	-0.28057	0.825286	0.456304	0.291003	0.305671	0.712057	Beta subunit of C-terminal domain kinase I (CTDK-I); which phosphorylates both RNA pol II subunit Rpo21p to affect transcription and pre-mRNA 3' end processing, and ribosomal protein Rps2p to increase translational fidelity; relocalizes to the cytosol in response to hypoxia	carboxy-terminal domain protein kinase complex	DNA-templated transcription, elongation_protein phosphorylation_regulation of translation_transcription from RNA polymerase I promoter_translational elongation	NA	NA	DNA	other	0	143
YKL139W	CTK1	-0.473115	-0.200417	0.0530924	0.0254942	0.0247296	0.902093	0.237373	0.124124	0.0784305	0.241394	Catalytic (alpha) subunit of C-terminal domain kinase I (CTDK-I); phosphorylates both RNA pol II subunit Rpo21p to affect transcription and pre-mRNA 3' end processing, and ribosomal protein Rps2p to increase translational fidelity; required for H3K36 trimethylation but not dimethylation by Set2p; suggested stimulatory role in 80S formation during translation initiation; similar to the Drosophila …	carboxy-terminal domain protein kinase complex	DNA-templated transcription, elongation_mRNA processing_peptidyl-amino acid modification_protein phosphorylation_regulation of translation_transcription from RNA polymerase I promoter_transcription from RNA polymerase II promoter_translational elongation_translational initiation	NA	NA	RNA	other	0	144
YDR443C	SSN2	0.492268	-1.1836	-0.957224	-0.740349	-0.409411	NA	0.738349	0.337629	0.401146	0.788287	Subunit of the RNA polymerase II mediator complex; associates with core polymerase subunits to form the RNA polymerase II holoenzyme; required for stable association of Srb10p-Srb11p kinase; essential for transcriptional regulation	Kornberg's mediator (SRB) complex	response to chemical_transcription from RNA polymerase II promoter	NA	NA	DNA	other	0	145
YCR081W	SRB8	-0.65746	-0.340477	-0.155648	-0.219482	0.0887166	1.0029	0.276105	0.186602	0.336325	0.695618	Subunit of the RNA polymerase II mediator complex; associates with core polymerase subunits to form the RNA polymerase II holoenzyme; essential for transcriptional regulation; involved in glucose repression	Kornberg's mediator (SRB) complex	response to chemical_transcription from RNA polymerase II promoter	NA	NA	DNA	other	0	146
YDR308C	SRB7	-0.578485	-0.175686	-0.343081	-0.325155	-0.584187	0.705704	0.120135	0.0592854	0.0589996	0.317033	Subunit of the RNA polymerase II mediator complex; associates with core polymerase subunits to form the RNA polymerase II holoenzyme; essential for transcriptional regulation; target of the global repressor Tup1p	Kornberg's mediator (SRB) complex	transcription from RNA polymerase II promoter	NA	NA	DNA	other	0	147
YBR253W	SRB6	-0.43193	-0.260831	-0.129378	0.0808395	0.456633	0.901284	0.236058	0.383576	0.225275	0.273066	Subunit of the RNA polymerase II mediator complex; associates with core polymerase subunits to form the RNA polymerase II holoenzyme; essential for transcriptional regulation	Kornberg's mediator (SRB) complex	transcription from RNA polymerase II promoter	NA	NA	DNA	other	0	148
YGR104C	SRB5	-0.418844	-0.267345	-0.246844	-0.35989	-0.124178	1.03113	0.183314	0.156849	0.433195	0.168973	Subunit of the RNA polymerase II mediator complex; associates with core polymerase subunits to form the RNA polymerase II holoenzyme; essential for transcriptional regulation; required for proper termination of transcription for some genes; involved in telomere maintenance	Kornberg's mediator (SRB) complex	DNA-templated transcription, initiation_DNA-templated transcription, termination_transcription from RNA polymerase II promoter	NA	NA	DNA	other	0	149
YER022W	SRB4	-0.603781	-0.162682	-0.382214	-0.331103	-0.309817	1.03165	0.114888	0.213984	0.647314	1.30885	Subunit of the RNA polymerase II mediator complex; associates with core polymerase subunits to form the RNA polymerase II holoenzyme; required for basal RNA polymerase II transcription; homozygosity of the human MED17 L371P mutation is associated with infantile cerebral and cerebellar atrophy with poor myelination	Kornberg's mediator (SRB) complex	DNA-templated transcription, initiation_transcription from RNA polymerase II promoter	NA	NA	DNA	other	0	150
YHR041C	SRB2	-0.247786	-0.998727	-0.555058	-0.749886	-0.992881	0.915763	0.348074	0.177154	0.5525	0.752275	Subunit of the RNA polymerase II mediator complex; associates with core polymerase subunits to form the RNA polymerase II holoenzyme; general transcription factor involved in telomere maintenance	Kornberg's mediator (SRB) complex	DNA-templated transcription, initiation_response to chemical_transcription from RNA polymerase II promoter	NA	NA	DNA	other	0	151
YGL127C	SOH1	-0.32277	-0.205068	-0.102162	-0.0797898	-0.0198418	0.433653	0.115165	0.124662	0.0623677	0.4466	Subunit of the RNA polymerase II mediator complex; associates with core polymerase subunits to form the RNA polymerase II holoenzyme; involved in telomere maintenance; conserved with other metazoan MED31 subunits	Kornberg's mediator (SRB) complex	DNA recombination_DNA repair_cellular response to DNA damage stimulus_chromosome segregation_meiotic cell cycle_organelle fission_transcription from RNA polymerase II promoter	NA	NA	DNA	other	0	152
YNL236W	SIN4	-0.748744	-0.158205	-0.0691315	-0.112639	-0.442497	0.997681	0.123842	0.0425333	0.224737	0.783644	Subunit of the RNA polymerase II mediator complex; associates with core polymerase subunits to form the RNA polymerase II holoenzyme; contributes to both postive and negative transcriptional regulation; dispensible for basal transcription	Kornberg's mediator (SRB) complex	DNA-templated transcription, initiation_transcription from RNA polymerase II promoter	NA	NA	DNA	other	0	153
YBL093C	ROX3	0.0652299	0.0928058	0.0813386	-0.0894507	-0.289395	0.770034	0.128872	0.068883	0.189206	0.163232	Subunit of the RNA polymerase II mediator complex; associates with core polymerase subunits to form the RNA polymerase II holoenzyme	Kornberg's mediator (SRB) complex	DNA-templated transcription, initiation_transcription from RNA polymerase II promoter	NA	NA	DNA	other	0	154
YLR071C	RGR1	0.0428141	-0.233889	-0.0105436	-0.511868	-1.0754	0.471467	0.470997	0.348908	0.233945	0.781592	Subunit of the RNA polymerase II mediator complex; associates with core polymerase subunits to form the RNA polymerase II holoenzyme; required for glucose repression, HO repression, RME1 repression and sporulation	Kornberg's mediator (SRB) complex	transcription from RNA polymerase II promoter	NA	NA	DNA	other	0	155
YGL025C	PGD1	-0.165607	0.123618	-0.248049	-0.337338	0.482083	0.731608	0.126634	0.238466	0.141048	0.523266	Subunit of the RNA polymerase II mediator complex; associates with core polymerase subunits to form the RNA polymerase II holoenzyme; essential for basal and activated transcription; direct target of Cyc8p-Tup1p transcriptional corepressor	Kornberg's mediator (SRB) complex	DNA-templated transcription, initiation_transcription from RNA polymerase II promoter	NA	NA	DNA	other	0	156
YPR168W	NUT2	0.520307	0.140137	-0.096861	-0.11975	-0.324134	0.315748	0.347499	0.632119	0.393717	0.677483	Subunit of the RNA polymerase II mediator complex; associates with core polymerase subunits to form the RNA polymerase II holoenzyme; required for transcriptional activation and has a role in basal transcription; protein abundance increases in response to DNA replication stress	Kornberg's mediator (SRB) complex	transcription from RNA polymerase II promoter	NA	NA	DNA	other	0	157
YGL151W	NUT1	-0.826419	0.0714703	-0.280782	0.092865	-0.156926	0.393523	0.193555	0.47514	0.276557	0.23721	Component of the RNA polymerase II mediator complex; mediator is required for transcriptional activation and also has a role in basal transcription	Kornberg's mediator (SRB) complex	transcription from RNA polymerase II promoter	NA	NA	DNA	other	0	158
YBR193C	MED8	-0.338956	-0.157053	-0.362528	-0.356812	0.139019	NA	0.508057	0.177814	0.485938	0.949784	Subunit of the RNA polymerase II mediator complex; associates with core polymerase subunits to form the RNA polymerase II holoenzyme; essential for transcriptional regulation	Kornberg's mediator (SRB) complex	transcription from RNA polymerase II promoter	NA	NA	DNA	other	0	159
YOL135C	MED7	-0.148811	-0.188859	-0.380592	-0.271683	-0.0647346	0.991004	0.386802	0.0916184	0.192059	0.537885	Subunit of the RNA polymerase II mediator complex; associates with core polymerase subunits to form the RNA polymerase II holoenzyme; essential for transcriptional regulation	Kornberg's mediator (SRB) complex	transcription from RNA polymerase II promoter	NA	NA	DNA	other	0	160
YHR058C	MED6	-0.317806	0.15753	0.0450198	0.158	-0.215037	0.819605	0.119957	0.125182	0.294191	0.447458	Subunit of the RNA polymerase II mediator complex; associates with core polymerase subunits to form the RNA polymerase II holoenzyme; essential for transcriptional regulation; protein abundance increases in response to DNA replication stress	Kornberg's mediator (SRB) complex	DNA-templated transcription, initiation_transcription from RNA polymerase II promoter	NA	NA	DNA	other	0	161
YOR174W	MED4	-1.18769	-0.166041	-0.0432466	-0.394792	-0.181154	NA	NA	NA	NA	NA	Subunit of the RNA polymerase II mediator complex; associates with core polymerase subunits to form the RNA polymerase II holoenzyme; essential for transcriptional regulation	Kornberg's mediator (SRB) complex	transcription from RNA polymerase II promoter	NA	NA	DNA	other	0	162
YDL005C	MED2	-1.4203	-0.34741	-0.312672	-0.300056	-0.170787	0.322662	0.471025	0.797452	0.643787	0.82887	Subunit of the RNA polymerase II mediator complex; associates with core polymerase subunits to form the RNA polymerase II holoenzyme; essential for transcriptional regulation; relocalizes to the cytosol in response to hypoxia	Kornberg's mediator (SRB) complex	DNA-templated transcription, initiation_transcription from RNA polymerase II promoter	NA	NA	DNA	other	0	163
YMR112C	MED11	-0.737313	-0.508306	-0.247055	-0.301832	-0.340156	1.17804	0.36796	0.176526	0.281271	0.255324	Subunit of the RNA polymerase II mediator complex; associates with core polymerase subunits to form the RNA polymerase II holoenzyme; essential protein	Kornberg's mediator (SRB) complex	DNA-templated transcription, initiation_transcription from RNA polymerase II promoter	NA	NA	DNA	other	0	164
YPR070W	MED1	-0.492312	-0.517913	-0.318801	-0.191484	-0.252487	0.563526	0.414822	0.356852	0.198698	0.299084	Subunit of the RNA polymerase II mediator complex; associates with core polymerase subunits to form the RNA polymerase II holoenzyme; essential for transcriptional regulation	Kornberg's mediator (SRB) complex	transcription from RNA polymerase II promoter	NA	NA	DNA	other	0	165
YOL051W	GAL11	0.212455	-0.161356	-0.126937	-0.0687322	-0.488968	0.731012	0.574219	0.0722115	0.022905	0.974474	Subunit of the RNA polymerase II mediator complex; associates with core polymerase subunits to form the RNA polymerase II holoenzyme; affects transcription by acting as target of activators and repressors; forms part of the tail domain of mediator	Kornberg's mediator (SRB) complex	DNA-templated transcription, initiation_invasive growth in response to glucose limitation_transcription from RNA polymerase II promoter	NA	NA	DNA	other	0	166
YNR010W	CSE2	-0.438267	-0.228923	-0.0364217	-0.228114	0.0452601	1.48988	0.18985	0.335521	0.225981	0.60408	Subunit of the RNA polymerase II mediator complex; associates with core polymerase subunits to form the RNA polymerase II holoenzyme; component of the Middle domain of mediator; required for regulation of RNA polymerase II activity; relocalizes to the cytosol in response to hypoxia	Kornberg's mediator (SRB) complex	transcription from RNA polymerase II promoter	NA	NA	DNA	other	0	167
YPR045C	THP3	-0.249317	-0.264396	0.106303	-0.25201	-0.225044	NA	0.551228	0.249528	0.385769	0.248687	Protein that may have a role in transcription elongation; forms a complex with Csn12p that is recruited to transcribed genes; possibly involved in splicing based on pre-mRNA accumulation defect for many intron-containing genes	NA	RNA splicing_mRNA processing	NA	NA	RNA	other	0	168
YNR052C	POP2	-0.00334092	-0.304157	-0.357457	-0.251818	-0.3409	0.0610568	0.250919	0.295445	0.187685	0.182397	RNase of the DEDD superfamily; subunit of the Ccr4-Not complex that mediates 3' to 5' mRNA deadenylation	CCR4-NOT core complex	DNA-templated transcription, elongation_RNA catabolic process_transcription from RNA polymerase II promoter	NA	NA	RNA	other	0	169
YAL021C	CCR4	0.179739	-0.172088	-0.479069	-0.416178	0.613368	0.614124	0.190632	0.423658	0.254406	0.363399	Component of the CCR4-NOT transcriptional complex; CCR4-NOT is involved in regulation of gene expression; component of the major cytoplasmic deadenylase, which is involved in mRNA poly(A) tail shortening	CCR4-NOT core complex_Cdc73p/Paf1p complex	DNA replication_DNA-templated transcription, elongation_RNA catabolic process_mitotic cell cycle_regulation of DNA metabolic process_regulation of cell cycle_transcription from RNA polymerase II promoter	NA	NA	RNA	other	0	170
YFL023W	BUD27	0.10357	-0.569632	-0.188529	-0.535886	-0.658018	0.446652	0.13491	0.291429	0.178468	0.325445	Unconventional prefoldin protein involved in translation initiation; required for correct assembly of RNAP I, II, and III in an Rpb5p-dependent manner; shuttles between nucleus and cytoplasm; mutants have inappropriate expression of nutrient sensitive genes due to translational derepression of Gcn4p transcription factor; diploid mutants show random budding; ortholog of human URI/RMP	NA	protein complex biogenesis_translational initiation	NA	NA	other	other	0	171
YLR141W	RRN5	-0.419839	-0.136351	-0.0680387	-0.398033	0.703047	0.231949	0.260234	0.211091	0.091649	0.917647	Protein involved in transcription of rDNA by RNA polymerase I; transcription factor, member of UAF (upstream activation factor) family along with Rrn9p and Rrn10p	RNA polymerase I upstream activating factor complex	chromatin organization_transcription from RNA polymerase I promoter	NA	NA	DNA	other	0	172
YDR026C	NSI1	-0.44984	-0.803174	-0.350772	-0.527294	-0.223552	0.880471	0.406913	0.457288	0.112543	0.525696	RNA polymerase I termination factor; binds to rDNA terminator element, required for efficient Pol I termination; required for rDNA silencing at NTS1; facilities association of Sir2p with NTS1, contributes to rDNA stability and cell longevity; interacts physically with Fob1p and RENT subunits, Sir2p and Net1p; may interact with ribosomes, based on co-purification experiments; Myb-like DNA-binding …	NA	DNA-templated transcription, termination_chromatin organization_transcription from RNA polymerase I promoter	NA	yetfasco	DNA	other	0	173
YOR295W	UAF30	0.651484	-0.552002	-0.519826	-0.203022	-0.307457	NA	0.297415	0.382575	0.116773	0.826291	Subunit of UAF (upstream activation factor) complex; UAF is an RNA polymerase I specific transcription stimulatory factor composed of Uaf30p, Rrn5p, Rrn9p, Rrn10p, histones H3 and H4; targeting factor for the UAF that facilitates activation of many rDNA genes; deletion decreases cellular growth rate; UAF30 has a paralog, TRI1, that arose from the whole genome duplication	RNA polymerase I upstream activating factor complex	chromatin organization_transcription from RNA polymerase I promoter	NA	NA	DNA	other	0	174
YNL025C	SSN8	-0.739289	-0.31664	-0.474923	-0.636254	-0.51542	1.5517	0.216421	0.174046	0.247997	0.599187	Cyclin-like component of the RNA polymerase II holoenzyme; involved in phosphorylation of the RNA polymerase II C-terminal domain; forms a kinase-cyclin pair in the RNAPII holoenzyme with Ssn3p; required for both entry into and execution of the meiotic program; involved in glucose repression and telomere maintenance; cyclin homolog 35% identical to human cyclin C	Kornberg's mediator (SRB) complex	meiotic cell cycle_response to chemical_transcription from RNA polymerase II promoter	NA	NA	DNA	other	0	175
YJR136C	TTI2	-0.258191	-0.744613	-0.311564	-0.721239	-0.918639	0.171576	0.100485	0.281686	0.382572	0.644623	Subunit of the ASTRA complex, involved in chromatin remodeling; telomere length regulator involved in the stability or biogenesis of PIKKs such as TORC1; similar to S. pombe Tti2p; may interact with Rsm23p; GFP-fusion protein localizes to the cytoplasm	NA	cellular response to DNA damage stimulus_response to heat_response to osmotic stress	NA	NA	DNA	other	0	176
YKL033W	TTI1	0.0604119	-0.447601	-0.474639	-0.830735	-0.471018	0.550769	0.249813	0.368671	0.280102	0.227521	Subunit of the ASTRA complex, involved in chromatin remodeling; telomere length regulator involved in the stability or biogenesis of PIKKs such as TORC1; similar to S. pombe Tti1p; detected in highly purified mitochondria in high-throughput studies	NA	biological_process	NA	NA	other	other	0	177
YGR099W	TEL2	-0.570673	-0.45966	-0.290202	-0.0284596	0.331834	0.749861	0.214346	0.22263	0.137858	0.440984	Subunit of the ASTRA complex, involved in chromatin remodeling; subunit of the telomere cap complex DNA-binding protein specific to single-stranded yeast telomeric DNA repeats, required for telomere length regulation and telomere position effect; involved in the stability or biogenesis of PIKKs such as TORC1	NA	telomere organization	NA	NA	other	other	0	178
YER164W	CHD1	-0.225983	-0.0900575	-0.254597	-0.260676	-0.249599	0.775262	0.326737	0.584788	0.424746	0.293959	Chromatin remodeler that regulates various aspects of transcription; acts in in conjunction with Isw1b to regulate chromatin structure and maintain chromatin integrity during transcription elongation by RNAP II by preventing trans-histone exchange over coding regions; contains a chromo domain, a helicase domain and a DNA-binding domain; component of both the SAGA and SLIK complexes	SAGA complex_SLIK (SAGA-like) complex	DNA replication_DNA-templated transcription, elongation_DNA-templated transcription, initiation_DNA-templated transcription, termination_chromatin organization_histone modification_peptidyl-amino acid modification_protein acylation_protein complex biogenesis_protein modification by small protein conjugation or removal_regulation of DNA metabolic process_regulation of protein modification process_…	NA	NA	DNA	other	0	179
YAL019W	FUN30	0.0790216	0.204464	0.30762	0.118315	-0.518227	0.410834	0.161336	0.327932	0.43011	0.212038	Snf2p family member with ATP-dependent chromatin remodeling activity; has a role in silencing at the mating type locus, telomeres and centromeres; enriched at centromeres and is required for correct chromatin structure around centromeres, as well as at the boundary element of the silent HMR; recruited to DNA double-strand breaks (DSBs) where it promotes 5' strand resection of DSBs; potential Cdc2…	NA	DNA repair_cellular response to DNA damage stimulus_chromatin organization_transcription from RNA polymerase II promoter	NA	NA	DNA	other	6	180
YNL059C	ARP5	0.0582765	0.179206	0.157278	-0.107768	-0.203947	0.636359	0.254025	0.21593	0.727768	0.972889	Nuclear actin-related protein involved in chromatin remodeling; component of chromatin-remodeling enzyme complexes; promotes nucleosome shifts in the 3 prime direction	Ino80p complex	chromatin organization	NA	NA	DNA	other	6	181
YOR141C	ARP8	-0.0174035	1.76634	1.69236	1.52804	1.24669	0.681145	0.194666	0.379127	0.272196	0.509638	Nuclear actin-related protein involved in chromatin remodeling; component of chromatin-remodeling enzyme complexes; has mRNA binding activity	Ino80p complex	DNA recombination_DNA repair_cellular response to DNA damage stimulus_chromatin organization	NA	NA	DNA	other	6	182
YDR190C	RVB1	1.36398	2.33393	2.02777	1.74572	0.575945	0.326506	0.226932	0.363236	0.371916	1.02407	ATP-dependent DNA helicase, also known as pontin; member of the AAA+ and RuvB-like protein families; similar to Rvb2p; conserved component of multiple complexes including the INO80 complex, the Swr1 complex, and the R2TP complex (Rvb1-Rvb2-Tah1-Pih1); involved in multiple processes such as chromatin remodeling, box C/D snoRNP assembly, and RNA polymerase II assembly	Ino80p complex_Swr1p complex	chromatin organization_transcription from RNA polymerase II promoter	NA	NA	DNA	other	6	183
YPL235W	RVB2	0.160368	0.904226	1.01198	0.927075	0.661203	0.348267	0.427518	0.286572	0.488436	0.529278	ATP-dependent DNA helicase, also known as reptin; member of the AAA+ and RuvB protein families, similar to Rvb1p; conserved component of multiple complexes including the INO80 complex, the Swr1 complex, and the R2TP complex (Rvb1-Rvb2-Tah1-Pih1); involved in multiple processes such as chromatin remodeling, box C/D snoRNP assembly, and RNA polymerase II assembly	Ino80p complex_Swr1p complex	chromatin organization_rRNA processing_transcription from RNA polymerase II promoter	NA	NA	RNA	other	6	184
YEL044W	IES6	0.190443	1.04774	1.20413	0.723319	0.367213	0.971844	0.187243	0.287829	0.696312	0.873389	Component of the INO80 chromatin remodeling complex; critical for INO80 function; involved in regulation of chromosome segregation and maintenance of normal centromeric chromatin structure; human ortholog INO80C is a member of the human INO80 complex; implicated in DNA repair based on genetic interactions with RAD52 epistasis genes	NA	chromatin organization_chromosome segregation	NA	NA	DNA	other	6	185
YER092W	IES5	0.134894	0.748066	0.578374	0.516121	-0.511584	0.474295	0.478446	0.488707	0.495646	1.00887	Non-essential INO80 chromatin remodeling complex subunit; deletion affects telomere maintenance via recombination	NA	DNA recombination_telomere organization	NA	NA	DNA	other	6	186
YLR052W	IES3	0.536971	1.06736	0.975359	0.905751	0.568118	0.251092	0.0479368	0.125454	0.148135	0.176847	Subunit of the INO80 chromatin remodeling complex	Ino80p complex	DNA recombination_chromatin organization_telomere organization	NA	NA	DNA	other	6	187
YDL002C	NHP10	1.36333	1.13845	0.624069	1.22185	0.369086	1.53887	0.0620354	0.176681	0.371918	0.697333	Non-essential INO80 chromatin remodeling complex subunit; preferentially binds DNA ends, protecting them from exonucleatic cleavage; deletion affects telomere maintenance via recombination; related to mammalian high mobility group proteins	Ino80p complex	DNA recombination_DNA repair_cellular response to DNA damage stimulus_chromatin organization_telomere organization	NA	yetfasco	DNA	other	6	188
YGL150C	INO80	0.403066	0.992691	0.867743	0.938415	0.378787	0.205456	0.326618	0.0636625	0.13403	0.26672	ATPase and nucleosome spacing factor; subunit of complex containing actin and actin-related proteins that has chromatin remodeling activity and 3' to 5' DNA helicase activity in vitro; promotes nucleosome shifts in the 3 prime direction; has a role in modulating stress gene transcription	Ino80p complex	DNA recombination_DNA repair_cellular response to DNA damage stimulus_chromatin organization_chromosome segregation_telomere organization_transcription from RNA polymerase II promoter	NA	NA	DNA	other	6	189
YFL013C	IES1	0.433173	0.292132	0.174903	0.0037068	-0.174666	NA	0.496099	0.312333	0.836175	0.803596	Subunit of the INO80 chromatin remodeling complex; relocalizes to the cytosol in response to hypoxia	Ino80p complex	chromatin organization	NA	NA	DNA	other	6	190
YNL215W	IES2	-0.262043	0.888235	0.614211	0.500698	-0.268216	0.655966	0.257034	0.347045	0.173996	0.295195	Protein that associates with the INO80 chromatin remodeling complex; associates with the INO80 complex under low-salt conditions; essential for growth under anaerobic conditions; protein abundance increases in response to DNA replication stress	NA	biological_process	NA	NA	other	other	6	191
YJL081C	ARP4	0.295428	0.605254	0.418785	0.671044	0.493889	1.24333	0.240341	0.220705	0.0739243	0.636856	Nuclear actin-related protein involved in chromatin remodeling; component of chromatin-remodeling enzyme complexes	Ino80p complex_NuA4 histone acetyltransferase complex_Swr1p complex	DNA repair_cellular response to DNA damage stimulus_chromatin organization_histone modification_organelle assembly_peptidyl-amino acid modification_protein acylation_protein complex biogenesis_transcription from RNA polymerase II promoter	NA	NA	DNA	other	6	192
YOR189W	IES4	0.826895	0.565833	0.575458	0.425418	0.0547192	0.67415	0.0213085	0.143601	0.421907	0.104399	Component of the INO80 chromatiin remodeling complex; target of the Mec1p/Tel1p DNA damage signaling pathway; proposed to link chromatin remodeling to replication checkpoint responses	Ino80p complex	DNA recombination_cellular response to DNA damage stimulus_telomere organization	NA	NA	DNA	other	6	193
YBR245C	ISW1	NA	NA	NA	NA	NA	NA	NA	NA	NA	NA	ATPase subunit of imitation-switch (ISWI) class chromatin remodelers; with Ioc3p forms Isw1a complex involved in repression of transcription initiation; with Ioc2p and Ioc4p forms Isw1b complex involved in regulation of transcription elongation; Isw1b recruited to ORFs by H3K36 methylation and acts with Chd1p to prevent trans-histone exchange over coding regions; Isw1p import into nucleus depends…	ISW1a complex_ISW1b complex	DNA-templated transcription, elongation_DNA-templated transcription, initiation_DNA-templated transcription, termination_chromatin organization_chromosome segregation_protein complex biogenesis_transcription from RNA polymerase I promoter_transcription from RNA polymerase II promoter	NA	NA	DNA	other	0	194
YFR013W	IOC3	-0.163872	0.514913	0.767292	0.42722	-0.105149	0.194061	0.101757	0.204621	0.0542748	0.0877698	Subunit of the Isw1a complex; Isw1a has nucleosome-stimulated ATPase activity and represses transcription initiation by specific positioning of a promoter proximal dinucleosome; promotes nucleosome shifts in the 5 prime direction; IOC3 has a paralog, ESC8, that arose from the whole genome duplication	ISW1a complex	chromatin organization_chromosome segregation	NA	NA	DNA	other	6	195
YMR044W	IOC4	0.977014	1.16272	1.11843	1.23573	0.400442	0.102217	0.419663	0.277435	0.0792151	0.416627	Member of a complex (Isw1b) with Isw1p and Ioc2p; interacts directly with H3K36me3 nucleosomes through its PWWP domain to recruit the Isw1b complex to open reading frames in a Set2p-dependent manner; Isw1b exhibits nucleosome-stimulated ATPase activity and acts within coding regions to coordinate transcription elongation with termination and processing	ISW1b complex	chromatin organization_chromosome segregation	NA	NA	DNA	other	6	196
YLR095C	IOC2	0.180388	1.08097	0.980445	1.19509	0.387598	0.756322	0.245074	0.144661	0.090629	0.356867	Subunit of the Isw1b complex; exhibits nucleosome-stimulated ATPase activity and acts within coding regions to coordinate transcription elongation with termination and processing; contains a PHD finger motif; other complex members are Isw1p and Ioc4p	ISW1b complex	chromatin organization	NA	NA	DNA	other	6	197
YGL133W	ITC1	-0.800814	-0.0731658	0.0168072	-0.257726	-0.388005	0.303455	0.631796	0.411006	0.37939	0.490664	Subunit of ATP-dependent Isw2p-Itc1p chromatin remodeling complex; required for repression of a-specific genes, repression of early meiotic genes during mitotic growth, and repression of INO1; similar to mammalian Acf1p, the regulatory subunit of the mammalian ATP-utilizing chromatin assembly and modifying factor (ACF) complex; ITC1 has a paralog, YPL216W, that arose from the whole genome duplica…	chromatin accessibility complex	chromatin organization_response to chemical_transcription from RNA polymerase II promoter	NA	NA	DNA	other	6	198
YJL065C	DLS1	-0.486621	0.0383179	-0.179102	-0.0132168	-0.242712	0.41324	0.354927	0.258529	0.272836	0.356217	Subunit of ISW2/yCHRAC chromatin accessibility complex; ISW2/yCHRAC also includes Itc1p, Isw2p, and Dpb4p; involved in inheritance of telomeric silencing; DLS1 has a paralog, DPB3, that arose from the whole genome duplication	chromatin accessibility complex	chromatin organization	NA	NA	DNA	other	6	199
YOR304W	ISW2	-1.28256	0.0567748	0.0936532	0.087215	0.228801	0.665888	0.405289	0.416756	0.348751	0.206139	ATP-dependent DNA translocase involved in chromatin remodeling; ATPase component that, with Itc1p, forms a complex required for repression of a-specific genes, INO1, and early meiotic genes during mitotic growth; the Isw2 complex exhibits basal levels of chromatin binding throughout the genome as well as target-specific chromatin interactions; targeted by Ume6p- and Sua7p-dependent DNA looping to…	chromatin accessibility complex	DNA-templated transcription, termination_chromatin organization_response to chemical_transcription from RNA polymerase II promoter	NA	NA	DNA	other	6	200
YKR008W	RSC4	-0.429615	-0.696409	-0.5157	-0.386146	-0.0169881	0.512273	0.253831	0.299359	0.0483374	0.203414	Component of the RSC chromatin remodeling complex; found in close proximity to nucleosomal DNA; displaced from the surface of nucleosomal DNA after chromatin remodeling; acetylated (K25) by Gcn5p, altering replication stress tolerance; contains tandem bromodomains that recognize histone H3 acetylated on K14 (H3K14ac) by Gcn5p	RSC complex	DNA-templated transcription, elongation_chromatin organization_transcription from RNA polymerase II promoter	NA	NA	DNA	other	0	201
YDR303C	RSC3	1.13462	1.83959	1.97194	2.12701	0.870776	0.745551	0.318028	0.330011	0.0754295	0.388991	Component of the RSC chromatin remodeling complex; essential gene required for maintenance of proper ploidy and regulation of ribosomal protein genes and the cell wall/stress response; RSC3 has a paralog, RSC30, that arose from the whole genome duplication	RSC complex	DNA replication_DNA-templated transcription, elongation_chromatin organization_regulation of DNA metabolic process_regulation of cell cycle_transcription from RNA polymerase II promoter	NA	yetfasco	DNA	other	6	202
YML127W	RSC9	0.180703	1.68588	1.96579	2.144	1.10996	1.22179	0.339842	0.057392	0.278857	0.507183	Component of the RSC chromatin remodeling complex; DNA-binding protein involved in the synthesis of rRNA and in transcriptional repression and activation of genes regulated by the Target of Rapamycin (TOR) pathway	RSC complex	DNA-templated transcription, elongation_chromatin organization_response to chemical_response to oxidative stress_transcription from RNA polymerase II promoter	NA	NA	DNA	other	6	203
YMR091C	NPL6	0.914175	1.62394	1.82064	1.94924	0.952151	0.106781	0.0731968	0.0801658	0.0286613	0.345851	Component of the RSC chromatin remodeling complex; interacts with Rsc3p, Rsc30p, Ldb7p, and Htl1p to form a module important for a broad range of RSC functions	RSC complex	DNA-templated transcription, elongation_cellular response to DNA damage stimulus_chromatin organization_transcription from RNA polymerase II promoter	NA	NA	DNA	other	6	204
YIL126W	STH1	0.294703	1.08768	1.10613	1.21104	0.234985	0.49801	0.361308	0.438639	0.259244	0.619339	ATPase component of the RSC chromatin remodeling complex; required for expression of early meiotic genes; promotes base excision repair in chromatin; essential helicase-related protein homologous to Snf2p	RSC complex	DNA repair_DNA-templated transcription, elongation_cellular response to DNA damage stimulus_chromatin organization_chromosome segregation_cytoskeleton organization_meiotic cell cycle_mitotic cell cycle_organelle fission_transcription from RNA polymerase II promoter	NA	NA	DNA	other	6	205
YFR037C	RSC8	0.770104	1.57848	1.83918	1.90789	0.67369	0.169971	0.343293	0.0498752	0.17737	0.238217	Component of the RSC chromatin remodeling complex; essential for viability and mitotic growth; homolog of SWI/SNF subunit Swi3p, but unlike Swi3p, does not activate transcription of reporters	RSC complex	DNA repair_DNA-templated transcription, elongation_cellular response to DNA damage stimulus_chromatin organization_transcription from RNA polymerase II promoter	NA	NA	DNA	other	6	206
YCR020W-B	HTL1	0.0673317	1.61291	1.71119	1.85929	0.772056	0.821516	0.0636256	0.084531	0.0833694	0.183909	Component of the RSC chromatin remodeling complex; RSC functions in transcriptional regulation and elongation, chromosome stability, and establishing sister chromatid cohesion; involved in telomere maintenance	RSC complex	DNA-templated transcription, elongation_cellular response to DNA damage stimulus_chromatin organization_transcription from RNA polymerase II promoter	NA	NA	DNA	other	6	207
YLR321C	SFH1	0.628564	1.09558	1.18041	1.49	0.420516	0.978342	0.392713	0.193224	0.340716	0.550648	Component of the RSC chromatin remodeling complex; essential gene required for cell cycle progression and maintenance of proper ploidy; phosphorylated in the G1 phase of the cell cycle; Snf5p paralog; hSNF5 tumor suppressor ortholog	RSC complex	DNA repair_DNA replication_DNA-templated transcription, elongation_cellular response to DNA damage stimulus_chromatin organization_chromosome segregation_regulation of DNA metabolic process_regulation of cell cycle_transcription from RNA polymerase II promoter	NA	NA	DNA	other	6	208
YLR357W	RSC2	-0.0463024	1.19701	1.11947	1.13339	0.219443	1.15431	0.261917	0.239247	0.412759	0.633391	Component of the RSC chromatin remodeling complex; required for expression of mid-late sporulation-specific genes; involved in telomere maintenance; RSC2 has a paralog, RSC1, that arose from the whole genome duplication	RSC complex	DNA recombination_DNA repair_DNA-templated transcription, elongation_cellular response to DNA damage stimulus_chromatin organization_chromosome segregation_transcription from RNA polymerase II promoter	NA	NA	DNA	other	6	209
YGR056W	RSC1	-0.0701005	0.986705	1.05198	1.29904	0.32057	0.526755	0.329736	0.14285	0.200436	0.564194	Component of the RSC chromatin remodeling complex; required for expression of mid-late sporulation-specific genes; contains two essential bromodomains, a bromo-adjacent homology (BAH) domain, and an AT hook; RSC1 has a paralog, RSC2, that arose from the whole genome duplication	RSC complex	DNA repair_DNA-templated transcription, elongation_cellular response to DNA damage stimulus_chromatin organization_sporulation_transcription from RNA polymerase II promoter	NA	NA	DNA	other	6	210
YLR033W	RSC58	-0.191459	1.0737	0.985656	1.3611	0.535874	0.963682	0.239032	0.3532	0.055315	0.407476	Component of the RSC chromatin remodeling complex; RSC functions in transcriptional regulation and elongation, chromosome stability, and establishing sister chromatid cohesion; involved in telomere maintenance	RSC complex	DNA-templated transcription, elongation_chromatin organization_transcription from RNA polymerase II promoter	NA	NA	DNA	other	6	211
YCR052W	RSC6	-0.870944	0.167061	0.656219	0.36618	0.0113026	NA	NA	NA	NA	NA	Component of the RSC chromatin remodeling complex; essential for mitotic growth; RSC6 has a paralog, SNF12, that arose from the whole genome duplication	RSC complex	DNA-templated transcription, elongation_chromatin organization_transcription from RNA polymerase II promoter	NA	NA	DNA	other	6	212
YMR033W	ARP9	-1.37621	-0.518839	-0.056061	-0.576195	-0.474936	0.488135	0.367006	0.149268	0.565946	0.304097	Component of both the SWI/SNF and RSC chromatin remodeling complexes; actin-related protein involved in transcriptional regulation	SWI/SNF complex_RSC complex	DNA-templated transcription, elongation_chromatin organization_transcription from RNA polymerase II promoter	NA	NA	DNA	other	0	213
YPR034W	ARP7	-0.295707	1.44668	1.55683	1.60332	0.63683	0.790477	0.258897	0.122456	0.193547	0.477822	Component of both the SWI/SNF and RSC chromatin remodeling complexes; actin-related protein involved in transcriptional regulation	SWI/SNF complex_RSC complex	DNA-templated transcription, elongation_chromatin organization_transcription from RNA polymerase II promoter	NA	NA	DNA	other	6	214
YGR275W	RTT102	-0.685216	0.531491	0.551733	0.47645	-0.160556	0.639012	0.171637	0.0950427	0.100071	0.415073	Component of both the SWI/SNF and RSC chromatin remodeling complexes; suggested role in chromosome maintenance; possible weak regulator of Ty1 transposition; protein abundance increases in response to DNA replication stress	SWI/SNF complex_RSC complex	DNA-templated transcription, elongation_chromatin organization_chromosome segregation_transcription from RNA polymerase II promoter	NA	NA	DNA	other	6	215
YPL016W	SWI1	0.257888	-0.0911278	-0.126049	-0.262145	-0.267341	0.94597	0.20453	0.222142	0.112038	0.247005	Subunit of the SWI/SNF chromatin remodeling complex; regulates transcription by remodeling chromatin; required for transcription of many genes, including ADH1, ADH2, GAL1, HO, INO1 and SUC2; can form the prion [SWI+]; human homolog ARID1A is a candidate tumor suppressor gene in breast cancer	SWI/SNF complex	DNA replication_carbohydrate metabolic process_chromatin organization_oligosaccharide metabolic process_response to chemical_response to starvation_transcription from RNA polymerase II promoter	NA	NA	DNA	other	0	216
YHL025W	SNF6	0.150363	-0.0624802	0.0172717	0.0393311	0.208662	0.816983	0.166534	0.234566	0.0657278	0.332782	Subunit of the SWI/SNF chromatin remodeling complex; involved in transcriptional regulation; functions interdependently in transcriptional activation with Snf2p and Snf5p; relocates to the cytosol under hypoxic conditions	SWI/SNF complex	DNA repair_carbohydrate metabolic process_cellular response to DNA damage stimulus_chromatin organization_oligosaccharide metabolic process_rRNA processing_ribosomal large subunit biogenesis_transcription from RNA polymerase I promoter_transcription from RNA polymerase II promoter	NA	NA	RNA	other	0	217
YOR290C	SNF2	-0.495974	0.0384623	0.0554654	-0.113115	0.288834	NA	NA	NA	NA	NA	Catalytic subunit of the SWI/SNF chromatin remodeling complex; involved in transcriptional regulation; contains DNA-stimulated ATPase activity; functions interdependently in transcriptional activation with Snf5p and Snf6p	SWI/SNF complex	DNA recombination_DNA repair_DNA replication_carbohydrate metabolic process_cellular response to DNA damage stimulus_chromatin organization_invasive growth in response to glucose limitation_oligosaccharide metabolic process_response to starvation_transcription from RNA polymerase II promoter	NA	NA	DNA	other	0	218
YJL176C	SWI3	0.505009	-0.382256	-0.393916	-0.312988	-0.125937	0.428009	0.0705392	0.591875	0.284631	0.702637	Subunit of the SWI/SNF chromatin remodeling complex; SWI/SNF regulates transcription by remodeling chromosomes; contains SANT domain that is required for SWI/SNF assembly; is essential for displacement of histone H2A-H2B dimers during ATP-dependent remodeling; required for transcription of many genes, including ADH1, ADH2, GAL1, HO, INO1 and SUC2; relocates to the cytosol under hypoxic conditions	SWI/SNF complex	carbohydrate metabolic process_chromatin organization_oligosaccharide metabolic process_response to chemical_transcription from RNA polymerase II promoter	NA	NA	DNA	other	0	219
YLR385C	SWC7	0.430349	-0.124489	-0.0102519	-0.0335739	-0.707675	0.478432	0.232867	0.108015	0.0959828	0.172598	Protein of unknown function; component of the Swr1p complex that incorporates Htz1p into chromatin	Swr1p complex	chromatin organization	NA	NA	DNA	other	0	220
YBR231C	SWC5	0.0255724	0.0610535	0.000793368	-0.00547762	0.0818087	0.502266	0.0255745	0.132874	0.169823	0.672935	Component of the SWR1 complex; complex exchanges histone variant H2AZ (Htz1p) for chromatin-bound histone H2A; protein abundance increases in response to DNA replication stress; relocalizes to the cytosol in response to hypoxia	Swr1p complex	chromatin organization	NA	NA	DNA	other	0	221
YLR085C	ARP6	-0.294947	-0.333342	-0.782147	-0.635288	-0.448553	0.829666	0.196506	0.248687	0.314144	0.172298	Actin-related protein that binds nucleosomes; a component of the SWR1 complex, which exchanges histone variant H2AZ (Htz1p) for chromatin-bound histone H2A	Swr1p complex	chromatin organization	NA	NA	DNA	other	0	222
YAL011W	SWC3	-0.158074	0.181881	0.223244	0.140957	0.190877	0.6673	0.510531	0.796095	0.917185	1.24142	Protein of unknown function; component of the SWR1 complex, which exchanges histone variant H2AZ (Htz1p) for chromatin-bound histone H2A; required for formation of nuclear-associated array of smooth endoplasmic reticulum known as karmellae	Swr1p complex	chromatin organization	NA	NA	DNA	other	0	223
YDR485C	VPS72	-0.966731	-0.106192	-0.018979	-0.0216003	-0.755561	0.865033	0.207507	0.0960428	0.177195	0.299463	Htz1p-binding component of the SWR1 complex; exchanges histone variant H2AZ (Htz1p) for chromatin-bound histone H2A; may function as a lock that prevents removal of H2AZ from nucleosomes; required for vacuolar protein sorting	Swr1p complex	chromatin organization	NA	NA	DNA	other	0	224
YML041C	VPS71	0.424976	0.0590181	0.302724	0.353653	0.238279	NA	NA	NA	NA	NA	Nucleosome-binding component of the SWR1 complex; SWR1 exchanges histone variant H2AZ (Htz1p) for chromatin-bound histone H2A; required for vacuolar protein sorting	Swr1p complex	chromatin organization_protein targeting	NA	NA	DNA	other	0	225
YDR334W	SWR1	-0.088004	0.163973	0.549685	0.266479	-0.241214	0.333981	0.411794	0.16119	0.0606446	0.493705	Swi2/Snf2-related ATPase; structural component of the SWR1 complex, which exchanges histone variant H2AZ (Htz1p) for chromatin-bound histone H2A; relocalizes to the cytosol in response to hypoxia; chronological aging factor that mediates lifespan extension by dietary restriction	Swr1p complex	chromatin organization	NA	NA	DNA	other	0	226
YGR002C	SWC4	-0.262747	0.529059	0.512169	0.314813	-0.323753	NA	0.0472447	0.120508	0.0908743	0.338184	Component of the Swr1p complex that incorporates Htz1p into chromatin; component of the NuA4 histone acetyltransferase complex	NuA4 histone acetyltransferase complex_Swr1p complex	DNA repair_cellular response to DNA damage stimulus_chromatin organization_histone modification_peptidyl-amino acid modification_protein acylation	NA	NA	DNA	other	0	227
YPL055C	LGE1	0.950109	-0.35732	-0.308246	-0.264684	-0.96296	0.574089	0.407851	0.715641	0.499583	1.39497	Protein of unknown function; null mutant forms abnormally large cells, and homozygous diploid null mutant displays delayed premeiotic DNA synthesis and reduced efficiency of meiotic nuclear division	Lge1p/Bre1p complex	DNA replication_chromatin organization_histone modification_meiotic cell cycle_protein alkylation_protein modification by small protein conjugation or removal	NA	NA	DNA	other	0	228
YDL074C	BRE1	0.36262	0.24805	0.082779	0.247456	1.93205	NA	NA	NA	NA	NA	E3 ubiquitin ligase; forms heterodimer with Rad6p to regulate K63 polyubiquitination in response to oxidative stress and to monoubiquinate histone H2B-K123, which is required for the subsequent methylation of histone H3-K4 and H3-K79; required for DSBR, transcription, silencing, and checkpoint control; interacts with RNA-binding protein Npl3p, linking histone ubiquitination to mRNA processing; Br…	Lge1p/Bre1p complex	DNA recombination_DNA repair_DNA replication_cellular response to DNA damage stimulus_chromatin organization_histone modification_meiotic cell cycle_mitotic cell cycle_organelle fission_protein modification by small protein conjugation or removal_regulation of DNA metabolic process_regulation of cell cycle_telomere organization_transcription from RNA polymerase II promoter	NA	NA	DNA	other	0	229
YDR440W	DOT1	-1.19761	-0.397073	-0.0767726	-0.17008	0.0158854	0.0596981	0.132008	0.150294	0.24304	0.262269	Nucleosomal histone H3-Lys79 methylase; methylation is required for telomeric silencing, meiotic checkpoint control, and DNA damage response	NA	DNA recombination_DNA repair_cellular response to DNA damage stimulus_chromatin organization_histone modification_meiotic cell cycle_mitotic cell cycle_organelle fission_peptidyl-amino acid modification_protein alkylation_regulation of cell cycle_regulation of organelle organization	NA	NA	DNA	other	0	230
YLL022C	HIF1	-0.37776	-0.473347	-0.636112	-0.164568	-0.0941095	1.2845	0.39034	0.669635	0.452058	0.357716	Non-essential component of the HAT-B histone acetyltransferase complex; localized to the nucleus; has a role in telomeric silencing; other members are Hat1p and Hat2p	HAT-B complex	chromatin organization_histone modification_peptidyl-amino acid modification_protein acylation	NA	NA	DNA	other	0	231
YPR179C	HDA3	0.150542	0.0513929	-0.223379	-0.115547	-0.212346	0.316528	0.224129	0.166649	0.178045	0.398579	Subunit of the HDA1 histone deacetylase complex; possibly tetrameric trichostatin A-sensitive class II histone deacetylase complex contains Hda1p homodimer and an Hda2p-Hda3p heterodimer; required for the activity of the complex; relocalizes to the cytosol in response to hypoxia; similar to Hda2p	histone deacetylase complex	chromatin organization_chromosome segregation_histone modification_transcription from RNA polymerase II promoter	NA	NA	DNA	other	0	232
YDR295C	HDA2	-0.991944	-0.181203	-0.0874242	-0.2941	-0.440746	0.527862	0.372095	0.299721	0.544532	0.409399	Subunit of the HDA1 histone deacetylase complex; possibly tetrameric trichostatin A-sensitive class II histone deacetylase complex contains Hda1p homodimer and an Hda2p-Hda3p heterodimer; involved in telomere maintenance; relocalizes to the cytosol in response to hypoxia	histone deacetylase complex	chromatin organization_histone modification_transcription from RNA polymerase II promoter	NA	NA	DNA	other	0	233
YNL021W	HDA1	-0.0736311	-0.0438986	0.197822	0.244101	0.0848989	0.155361	0.448942	0.0763986	0.161506	0.45053	Putative catalytic subunit of a class II histone deacetylase complex; role in azole resistance via Hsp90p, and in the heat shock response; Hda1p interacts with the Hda2p-Hda3p subcomplex to form an active tetramer; deletion increases histone H2B, H3 and H4 acetylation; other members of the HDA1 histone deacetylase complex are Hda2p and Hda3p	histone deacetylase complex	chromatin organization_histone modification_transcription from RNA polymerase II promoter	NA	NA	DNA	other	0	234
YDR266C	HEL2	-0.0292289	0.0771735	0.0461704	-0.0589605	-0.232122	0.00556266	0.502829	0.127923	0.156827	0.34857	RING finger ubiquitin ligase (E3); involved in ubiquitylation and degradation of excess histones; interacts with Ubc4p and Rad53p; null mutant sensitive to hydroxyurea (HU); green fluorescent protein (GFP)-fusion protein localizes to the cytoplasm; computational analysis suggests a role as a transcription factor	NA	chromatin organization_histone modification_protein modification by small protein conjugation or removal	NA	yetfasco	DNA	other	0	235
YKR017C	HEL1	-0.241968	-0.599998	-0.383737	-0.414994	-0.630908	NA	NA	NA	NA	NA	RING finger ubiquitin ligase (E3); involved in ubiquitylation and degradation of excess histones; interacts with Ubc4p and Rad53p; null mutant sensitive to hydroxyurea (HU)	NA	chromatin organization_histone modification_protein modification by small protein conjugation or removal	NA	NA	DNA	other	0	236
YPL116W	HOS3	-0.54373	-0.701254	-0.191823	-0.272241	0.278018	0.0908584	0.735241	0.493705	0.276015	0.207897	Trichostatin A-insensitive homodimeric histone deacetylase (HDAC); specificity in vitro for histones H3, H4, H2A, and H2B; similar to Hda1p, Rpd3p, Hos1p, and Hos2p; deletion results in increased histone acetylation at rDNA repeats	NA	chromatin organization_histone modification_mitotic cell cycle_transcription from RNA polymerase II promoter	NA	NA	DNA	other	0	237
YPR068C	HOS1	-1.42046	-0.331652	-0.299362	-0.568616	-0.132388	0.939302	0.154472	0.232593	0.291149	0.543341	Class I histone deacetylase (HDAC) family member; deacetylates Smc3p on lysine residues at anaphase onset; has sequence similarity to Hda1p, Rpd3p, Hos2p, and Hos3p; interacts with the Tup1p-Ssn6p corepressor complex	NA	chromatin organization_histone modification_peptidyl-amino acid modification_transcription from RNA polymerase II promoter	NA	NA	DNA	other	0	238
YDR191W	HST4	-0.897875	-0.427413	-0.592386	-0.461566	-0.412647	0.468399	0.195754	0.352022	0.178909	0.188607	NAD(+)-dependent protein deacetylase; deacetylation targets are primarily mitochondrial proteins; involved along with Hst3p in silencing at telomeres, cell cycle progression, radiation resistance, genomic stability and short-chain fatty acid metabolism; accumulates in mitochondria in response to biotin starvation and may link biotin metabolism with energy homeostasis; member of the Sir2 family an…	NA	chromatin organization_histone modification_lipid metabolic process_monocarboxylic acid metabolic process_response to starvation	NA	NA	DNA	other	0	239
YOR025W	HST3	-0.960326	-0.510541	-0.109911	-0.488184	-0.258858	0.861561	0.656624	0.331958	0.301197	0.134982	Member of the Sir2 family of NAD(+)-dependent protein deacetylases; involved along with Hst4p in telomeric silencing, cell cycle progression, radiation resistance, genomic stability and short-chain fatty acid metabolism	NA	chromatin organization_histone modification_lipid metabolic process_monocarboxylic acid metabolic process	NA	NA	DNA	other	0	240
YPL015C	HST2	-0.521907	-0.525218	-0.454038	-0.33937	-0.454894	1.53273	0.446664	0.0161622	0.248946	0.634848	Cytoplasmic NAD(+)-dependent protein deacetylase; deacetylation targets are primarily cytoplasmic proteins; member of the silencing information regulator 2 (Sir2) family of NAD(+)-dependent protein deacetylases; modulates nucleolar (rDNA) and telomeric silencing; possesses NAD(+)-dependent histone deacetylase activity in vitro; contains a nuclear export signal (NES); function regulated by its nuc…	NA	DNA recombination_chromatin organization_regulation of DNA metabolic process	NA	NA	DNA	other	0	241
YER169W	RPH1	-0.0382555	-0.151625	-0.264541	-0.139791	0.443923	0.725524	0.262148	0.303617	0.0407095	0.488218	JmjC domain-containing histone demethylase; targets tri- and dimethylated H3K36; associates with actively transcribed regions and promotes elongation; repressor of autophagy-related genes in nutrient-replete conditions; damage-responsive repressor of PHR1; phosphorylated by the Rad53p-dependent DNA damage checkpoint pathway and by a Rim1p-mediated event during starvation; target of stress-induced…	NA	DNA-templated transcription, elongation_chromatin organization_histone modification_transcription from RNA polymerase II promoter	NA	yetfasco	DNA	other	0	242
YJR119C	JHD2	-0.726308	-0.477077	-0.392871	-0.486528	-0.352732	0.296701	0.313048	0.20938	0.219762	1.0444	JmjC domain family histone demethylase; promotes global demethylation of H3K4 and repression of noncoding intergenic transcription during sporulation; removes methyl groups added by Set1p methyltransferase; negatively regulated by H3K14 acetylation; protein levels regulated by Not4p polyubiquitin-mediated degradation; regulates sporulation timing by extending period of active transcription in opp…	NA	RNA catabolic process_chromatin organization_histone modification_regulation of organelle organization_transcription from RNA polymerase II promoter	NA	NA	RNA	other	0	243
YER051W	JHD1	-0.397756	-0.327615	-0.507713	-0.269614	-0.336523	1.05042	0.230485	0.363064	0.352272	0.136422	JmjC domain family histone demethylase specific for H3-K36; similar to proteins found in human, mouse, drosophila, X. laevis, C. elegans, and S. pombe	NA	DNA-templated transcription, elongation_chromatin organization_histone modification_transcription from RNA polymerase II promoter	NA	yetfasco	DNA	other	0	244
YDR096W	GIS1	-1.10407	-0.449602	-0.277762	-0.0216747	0.128567	0.848757	0.00480321	0.40391	0.306829	0.244618	Histone demethylase and transcription factor; regulates genes during nutrient limitation; activity modulated by proteasome-mediated proteolysis; has JmjC and JmjN domain in N-terminus that interact, promoting stability and proper transcriptional activity; contains two transactivating domains downstream of Jmj domains and a C-terminal DNA binding domain; relocalizes to the cytosol in response to h…	NA	chromatin organization_histone modification_lipid metabolic process_response to starvation_transcription from RNA polymerase II promoter	NA	yetfasco	DNA	other	0	245
YBL052C	SAS3	-0.24855	-0.0227762	0.184342	0.249953	-0.0869814	NA	NA	NA	NA	NA	Histone acetyltransferase catalytic subunit of NuA3 complex; acetylates histone H3, involved in transcriptional silencing; homolog of the mammalian MOZ proto-oncogene; mutant has aneuploidy tolerance; sas3gcn5 double mutation is lethal	NuA3 histone acetyltransferase complex	chromatin organization_histone modification_peptidyl-amino acid modification_protein acylation	NA	NA	DNA	other	0	246
YPR031W	NTO1	0.154728	0.159302	-0.143355	0.0292099	-0.659612	0.251895	0.340584	0.677188	0.688788	0.972952	Subunit of the NuA3 histone acetyltransferase complex; this complex acetylates histone H3; contains PHD finger domain that interacts with methylated histone H3	NuA3 histone acetyltransferase complex	chromatin organization_histone modification_peptidyl-amino acid modification_protein acylation	NA	NA	DNA	other	6	247
YLR455W	#REF!	0.0223947	-0.0760946	-0.456181	-0.333404	-0.484367	1.18179	0.916338	1.39114	1.25366	0.363884	Component of the NuA3b histone acetyltransferase complex; regulates interaction between NuA3b and H3K36me3 at the transcribed regions of genes; contains PWWP domain; deletion confers sensitivity to 4-(N-(S-glutathionylacetyl)amino) phenylarsenoxide (GSAO); protein abundance increases in response to DNA replication stress; relocalizes to the cytosol in response to hypoxia	NA	DNA-templated transcription, elongation_transcription from RNA polymerase II promoter	NA	NA	DNA	other	6	248
YOR064C	YNG1	-0.445606	-0.100528	-0.124242	0.0605786	-0.110495	0.404756	0.315608	0.24169	0.204067	0.625268	Subunit of the NuA3 histone acetyltransferase complex; this complex acetylates histone H3; contains PHD finger domain that interacts with methylated histone H3; shares significant sequence identity with the human candidate tumor suppressor p33-ING1 in C-terminal region	NuA3 histone acetyltransferase complex	DNA-templated transcription, elongation_chromatin organization_histone modification_peptidyl-amino acid modification_protein acylation_transcription from RNA polymerase II promoter	NA	NA	DNA	other	6	249
YHR090C	YNG2	-0.417473	-0.60072	-0.408932	-0.308274	-1.26308	1.76002	0.276679	0.250924	0.143678	0.334474	Subunit of NuA4, an essential histone acetyltransferase complex; positions Piccolo NuA4 for efficient acetylation of histone H4 or histone H2A; relocalizes to the cytosol in response to hypoxia; similar to human tumor suppressor ING1 and its isoforms ING4 and ING5	NuA4 histone acetyltransferase complex	DNA repair_cellular response to DNA damage stimulus_chromatin organization_histone modification_peptidyl-amino acid modification_protein acylation	NA	NA	DNA	other	0	250
YNL107W	YAF9	-0.652087	-0.400895	-0.274134	-0.235286	0.256791	0.567465	0.367542	0.148494	0.221896	0.595665	Subunit of NuA4 histone H4 acetyltransferase and SWR1 complexes; may function to antagonize silencing near telomeres; interacts directly with Swc4p; has homology to human leukemogenic protein AF9; contains a YEATS domain	NuA4 histone acetyltransferase complex_Swr1p complex	DNA repair_cellular response to DNA damage stimulus_chromatin organization	NA	NA	DNA	other	0	251
YOR244W	ESA1	0.401778	-0.133197	-0.0996646	-0.0265711	-0.515539	0.506335	0.438527	0.204376	0.233967	0.335759	Catalytic subunit of the histone acetyltransferase complex (NuA4); acetylates four conserved internal lysines of histone H4 N-terminal tail and can acetylate histone H2A; master regulator of cellular acetylation balance; required for cell cycle progression and transcriptional silencing at the rDNA locus and regulation of autophagy; human ortholog TIP60/KAT5 is implicated in cancer and other disea…	NuA4 histone acetyltransferase complex	DNA repair_DNA-templated transcription, elongation_cellular response to DNA damage stimulus_chromatin organization_histone modification_peptidyl-amino acid modification_protein acylation_regulation of cell cycle_transcription from RNA polymerase II promoter	NA	NA	DNA	other	0	252
YFL024C	EPL1	-0.595857	-0.461138	-0.369401	-0.168028	0.0198847	1.49701	0.436749	0.326009	0.290472	0.11367	Subunit of NuA4, an essential histone H4/H2A acetyltransferase complex; conserved region at N-terminus is essential for interaction with the NPC (nucleosome core particle); required for autophagy; homologous to Drosophila Enhancer of Polycomb; coding sequence contains length polymorphisms in different strains	NuA4 histone acetyltransferase complex	DNA repair_cellular response to DNA damage stimulus_chromatin organization_histone modification_peptidyl-amino acid modification_protein acylation_transcription from RNA polymerase II promoter	NA	NA	DNA	other	0	253
YNL136W	EAF7	-0.256361	-0.290332	-0.438528	-0.366374	-0.390929	0.410699	0.177867	0.356681	0.211752	0.848034	Subunit of the NuA4 histone acetyltransferase complex; NuA4 acetylates the N-terminal tails of histones H4 and H2A	NuA4 histone acetyltransferase complex	DNA repair_cellular response to DNA damage stimulus_chromatin organization_histone modification_peptidyl-amino acid modification_protein acylation_transcription from RNA polymerase II promoter	NA	NA	DNA	other	0	254
YEL018W	EAF5	0.157906	0.123537	-0.048096	0.15728	0.13604	0.657699	0.267642	0.125088	0.213158	0.520937	Non-essential subunit of the NuA4 acetyltransferase complex; Esa1p-associated factor; relocalizes to the cytosol in response to hypoxia	NuA4 histone acetyltransferase complex	DNA repair_cellular response to DNA damage stimulus	NA	NA	DNA	other	0	255
YJR082C	EAF6	-0.0221966	0.0273996	0.135714	-0.0334682	0.0673865	0.655467	0.394804	0.597792	0.476772	0.242054	Subunit of the NuA4 acetyltransferase complex; this complex acetylates histone H4 and NuA3 acetyltransferase complex that acetylates histone H3	NuA3 histone acetyltransferase complex_NuA4 histone acetyltransferase complex	DNA repair_cellular response to DNA damage stimulus_chromatin organization_histone modification_peptidyl-amino acid modification_protein acylation	NA	NA	DNA	other	6	256
YMR231W	PEP5	-0.417601	-0.450113	-0.530795	-0.523753	0.377913	0.784697	0.256318	0.185331	0.200879	0.538711	Histone E3 ligase, component of CORVET membrane tethering complex; peripheral vacuolar membrane protein required for protein trafficking and vacuole biogenesis; interacts with Pep7p; involved in ubiquitylation and degradation of excess histones	CORVET complex_HOPS complex	Golgi vesicle transport_chromatin organization_endosomal transport_histone modification_membrane fusion_organelle fusion_protein complex biogenesis_protein modification by small protein conjugation or removal_regulation of organelle organization_regulation of transport_vacuole organization_vesicle organization	NA	NA	DNA	other	0	257
YDR075W	PPH3	-0.0485743	-0.234309	-0.0958505	-0.135542	0.0426184	0.282617	0.297405	0.272639	0.217463	0.558953	Catalytic subunit of protein phosphatase PP4 complex; Pph3p and Psy2p form active complex, Psy4p may provide substrate specificity; regulates recovery from the DNA damage checkpoint, the gene conversion- and single-strand annealing-mediated pathways of meiotic double-strand break repair and efficient Non-Homologous End-Joining (NHEJ) pathway; involved in activation of Gln3p to alleviate nitrogen …	histone H2A phosphatase complex	DNA recombination_DNA repair_cellular response to DNA damage stimulus_meiotic cell cycle_organelle fission_protein dephosphorylation_regulation of DNA metabolic process_regulation of cell cycle_regulation of organelle organization_response to chemical_signaling	NA	NA	DNA	other	0	258
YNL201C	PSY2	-0.22027	0.306151	0.427085	0.329723	-0.351181	0.258626	0.115029	0.220074	0.0238581	0.273009	Subunit of protein phosphatase PP4 complex; Pph3p and Psy2p form the active complex, Psy4p may provide additional substrate specificity; regulates recovery from the DNA damage checkpoint, the gene conversion- and single-strand annealing-mediated pathways of meiotic double-strand break repair and efficient Non-Homologous End-Joining (NHEJ) pathway; Pph3p and Psy2p localize to foci on meiotic chrom…	histone H2A phosphatase complex	DNA repair_cellular response to DNA damage stimulus_meiotic cell cycle_organelle fission_protein dephosphorylation_regulation of DNA metabolic process_regulation of cell cycle_regulation of organelle organization_response to chemical_signaling	NA	NA	DNA	other	6	259
YGL194C	HOS2	-0.594138	-0.482645	-0.424532	-0.303004	-0.235965	1.94453	0.348079	0.242481	0.117503	0.59907	Histone deacetylase and subunit of Set3 and Rpd3L complexes; required for gene activation via specific deacetylation of lysines in H3 and H4 histone tails; subunit of the Set3 complex, a meiotic-specific repressor of sporulation specific genes that contains deacetylase activity; co-localizes with Cmr1p in nuclear foci in response to DNA damage by MMS	Set3p complex	chromatin organization_histone modification_meiotic cell cycle_organelle fission_protein phosphorylation_regulation of cell cycle_regulation of organelle organization_regulation of protein modification process_signaling	NA	NA	DNA	other	0	260
YMR223W	UBP8	-0.177805	-0.180796	-0.357098	-0.122486	-0.56808	0.852623	0.159249	0.292247	0.549578	0.758077	Ubiquitin-specific protease component of the SAGA acetylation complex; required for SAGA (Spt-Ada-Gcn5-Acetyltransferase)-mediated deubiquitination of histone H2B	SAGA complex_SLIK (SAGA-like) complex	RNA splicing_chromatin organization_histone modification_peptidyl-amino acid modification_protein alkylation_protein modification by small protein conjugation or removal	NA	NA	RNA	other	0	261
YLR055C	SPT8	-0.465521	-0.175217	-0.0641532	-0.0660851	0.0567908	1.51236	0.15543	0.0540848	0.36455	0.0865177	Subunit of the SAGA transcriptional regulatory complex; not present in SAGA-like complex SLIK/SALSA; required for SAGA-mediated inhibition at some promoters	SAGA complex	chromatin organization_histone modification_peptidyl-amino acid modification_protein acylation_transcription from RNA polymerase II promoter	NA	NA	DNA	other	0	262
YBR081C	SPT7	0.0800377	-0.00701561	0.169216	0.167673	-0.162613	0.904686	0.150544	0.323502	0.0396146	0.18622	Subunit of the SAGA transcriptional regulatory complex; involved in proper assembly of the complex; also present as a C-terminally truncated form in the SLIK/SALSA transcriptional regulatory complex	SAGA complex_SLIK (SAGA-like) complex	chromatin organization_conjugation_histone modification_peptidyl-amino acid modification_protein acylation_protein complex biogenesis	NA	NA	DNA	other	0	263
YDR392W	SPT3	-0.62498	-0.0913218	-0.32135	-0.11209	-0.378204	1.02238	0.286332	0.109069	0.234722	0.304682	Subunit of the SAGA and SAGA-like transcriptional regulatory complexes; interacts with Spt15p to activate transcription of some RNA polymerase II-dependent genes, also functions to inhibit transcription at some promoters; relocalizes to the cytosol in response to hypoxia	SAGA complex_SLIK (SAGA-like) complex	chromatin organization_histone modification_invasive growth in response to glucose limitation_peptidyl-amino acid modification_protein acylation_pseudohyphal growth_transcription from RNA polymerase II promoter	NA	NA	DNA	other	0	264
YOL148C	SPT20	-0.645059	-0.335535	-0.515719	-0.451179	0.0339649	0.853418	0.27766	0.420267	0.313632	0.406693	Subunit of the SAGA transcriptional regulatory complex; involved in maintaining the integrity of the complex; mutant displays reduced transcription elongation in the G-less-based run-on (GLRO) assay	SAGA complex_SLIK (SAGA-like) complex	RNA splicing_chromatin organization_histone modification_mRNA processing_peptidyl-amino acid modification_protein acylation_response to chemical_signaling	NA	NA	RNA	other	0	265
YGL066W	SGF73	0.233047	-0.410954	-0.643922	-0.26851	-0.776861	0.621734	0.326545	0.403683	0.305206	1.19661	Subunit of DUBm module of SAGA and SLIK; has roles in anchoring deubiquitination module (DUBm) into SAGA and SLIK complexes, maintaining organization and ubiquitin-binding conformation of Ubp8p, thereby contributing to overall DUBm activity; involved in preinitiation complex assembly at promoters; relocalizes to cytosol under hypoxia; human homolog ATXN7 implicated in spinocerebellar ataxia, and …	SAGA complex_SLIK (SAGA-like) complex	DNA-templated transcription, initiation_chromatin organization_histone modification_nuclear transport_nucleobase-containing compound transport_peptidyl-amino acid modification_protein acylation_protein complex biogenesis_protein modification by small protein conjugation or removal_transcription from RNA polymerase II promoter	NA	NA	DNA	other	0	266
YCL010C	SGF29	0.434024	0.146443	0.166799	-0.022623	0.207436	0.398468	0.121895	0.386529	0.387242	0.371342	Component of the HAT/Core module of the SAGA, SLIK, and ADA complexes; HAT/Core module also contains Gcn5p, Ngg1p, and Ada2p; binds methylated histone H3K4; involved in transcriptional regulation through SAGA and TBP recruitment to target promoters and H3 acetylation	SAGA complex	chromatin organization_histone modification_peptidyl-amino acid modification_protein acylation_transcription from RNA polymerase II promoter	NA	NA	DNA	other	0	267
YPL047W	SGF11	0.334796	-0.168278	-0.0358408	-0.10565	-0.117405	0.518044	0.567599	0.187673	0.327587	0.345079	Integral subunit of SAGA histone acetyltransferase complex; regulates transcription of a subset of SAGA-regulated genes, required for the Ubp8p association with SAGA and for H2B deubiquitylation	SAGA complex	chromatin organization_histone modification_protein modification by small protein conjugation or removal_transcription from RNA polymerase II promoter	NA	NA	DNA	other	0	268
YDR176W	NGG1	-0.0975597	-0.462663	0.0300786	-0.240381	-0.533469	1.3432	0.188814	0.55351	0.403622	0.0947605	Subunit of chromatin modifying histone acetyltransferase complexes; member of the ADA complex, the SAGA complex, and the SLIK complex; transcriptional regulator involved in glucose repression of Gal4p-regulated genes	Ada2p/Gcn5p/Ada3 transcription activator complex_SAGA complex_SLIK (SAGA-like) complex	chromatin organization_histone modification_peptidyl-amino acid modification_protein acylation	NA	NA	DNA	other	0	269
YPL254W	HFI1	-1.77573	-0.170529	-0.241665	-0.270913	0.29917	NA	0.141297	0.427692	0.30758	0.539413	Adaptor protein required for structural integrity of the SAGA complex; a histone acetyltransferase-coactivator complex that is involved in global regulation of gene expression through acetylation and transcription functions	Ada2p/Gcn5p/Ada3 transcription activator complex_SAGA complex_SLIK (SAGA-like) complex	chromatin organization_histone modification_peptidyl-amino acid modification_protein acylation_transcription from RNA polymerase II promoter	NA	NA	DNA	other	0	270
YGR252W	GCN5	0.265371	0.0472334	-0.526486	-0.0603276	0.00928661	0.470161	0.3399	0.289325	0.390114	0.939919	Catalytic subunit of ADA and SAGA histone acetyltransferase complexes; modifies N-terminal lysines on histones H2B and H3; acetylates Rsc4p, a subunit of the RSC chromatin-remodeling complex, altering replication stress tolerance; relocalizes to the cytosol in response to hypoxia; mutant displays reduced transcription elongation in the G-less-based run-on (GLRO) assay; greater involvement in repr…	Ada2p/Gcn5p/Ada3 transcription activator complex_SAGA complex_SLIK (SAGA-like) complex	DNA-templated transcription, elongation_chromatin organization_histone modification_peptidyl-amino acid modification_protein acylation_transcription from RNA polymerase II promoter	NA	NA	DNA	other	0	271
YCR082W	AHC2	-0.606062	-0.271723	-0.32595	-0.498916	-0.59251	0.579466	0.169793	0.171528	0.370693	0.219164	Component of the ADA histone acetyltransferase complex; Ach2p and Ach1p are unique to the ADA complex and not shared with the related SAGA and SLIK complexes; may tether Ach1p to the complex	NA	chromatin organization_histone modification_peptidyl-amino acid modification_protein acylation	NA	NA	DNA	other	0	272
YOR023C	AHC1	-0.59585	-0.447702	-0.343895	-0.384606	-0.532132	1.14522	0.285529	0.318495	0.276015	0.675525	Subunit of the Ada histone acetyltransferase complex; required for structural integrity of the complex	Ada2p/Gcn5p/Ada3 transcription activator complex	chromatin organization_histone modification_peptidyl-amino acid modification_protein acylation	NA	NA	DNA	other	0	273
YDR448W	ADA2	0.03347	0.154469	-0.0883351	-0.13002	-0.243798	0.827869	0.199346	0.3915	0.529228	1.11537	Transcription coactivator; component of the ADA and SAGA transcriptional adaptor/HAT (histone acetyltransferase) complexes	Ada2p/Gcn5p/Ada3 transcription activator complex_SAGA complex_SLIK (SAGA-like) complex	chromatin organization_histone modification_peptidyl-amino acid modification_protein acylation_regulation of protein modification process_transcription from RNA polymerase II promoter	NA	NA	DNA	other	0	274
YOR213C	SAS5	-0.638157	-0.264683	0.20261	-0.168717	0.164288	0.913807	0.409178	0.185061	0.312931	0.588321	Subunit of the SAS complex (Sas2p, Sas4p, Sas5p); acetylates free histones and nucleosomes and regulates transcriptional silencing; stimulates Sas2p HAT activity	SAS Complex	chromatin organization	NA	NA	DNA	other	0	275
YDR181C	SAS4	-0.802811	-0.251612	-0.250393	-0.0108767	0.000894884	0.304734	0.0487876	0.282989	0.338391	0.527395	Subunit of the SAS complex (Sas2p, Sas4p, Sas5p); acetylates free histones and nucleosomes and regulates transcriptional silencing; required for the HAT activity of Sas2p	SAS Complex	chromatin organization	NA	NA	DNA	other	0	276
YMR127C	SAS2	-0.25719	-0.195137	-0.351714	-0.128312	0.190413	0.988027	0.158447	0.241637	0.0576246	0.236288	Histone acetyltransferase (HAT) catalytic subunit of the SAS complex; acetylates free histones and nucleosomes and regulates transcriptional silencing; member of the MYSTacetyltransferase family; other members are Sas4p and Sas5p	SAS Complex	chromatin organization_histone modification_peptidyl-amino acid modification_protein acylation	NA	NA	DNA	other	0	277
YBR175W	SWD3	-0.197116	-0.654141	-0.493236	-0.479279	-0.597217	0.570978	0.0803657	0.168063	0.323354	0.477634	Essential subunit of the COMPASS (Set1C) complex; COMPASS methylates histone H3 on lysine 4 and is required in transcriptional silencing near telomeres; WD40 beta propeller superfamily member and ortholog of mammalian WDR5	COMPASS complex	chromatin organization_histone modification_meiotic cell cycle_organelle fission_peptidyl-amino acid modification_protein alkylation_regulation of cell cycle_regulation of organelle organization_telomere organization	NA	NA	DNA	other	0	278
YAR003W	SWD1	0.116005	-0.317642	-0.13521	-0.158766	-0.640001	0.216283	0.384701	0.157211	0.140326	0.459506	Subunit of the COMPASS (Set1C) complex; COMPASS methylates histone H3 on lysine 4 and is required in transcriptional silencing near telomeres; WD40 beta propeller superfamily member with similarity to mammalian Rbbp7	COMPASS complex	chromatin organization_histone modification_peptidyl-amino acid modification_protein alkylation_telomere organization	NA	NA	DNA	other	0	279
YPL138C	SPP1	-0.625771	-0.212076	-0.0194794	-0.071675	0.0494297	0.245498	0.334129	0.245559	0.197437	0.376034	Subunit of COMPASS (Set1C); a complex which methylates histone H3 on lysine 4 and is required in telomeric transcriptional silencing; promotes meiotic DSB formation by interacting with H3K4me3 and Rec107p, a protein required for Spo11p-catalyzed DSB formation located on chromosome axes; interacts with Orc2p; PHD finger domain protein similar to human CGBP, an unmethylated CpG binding protein; rel…	COMPASS complex	chromatin organization_histone modification_meiotic cell cycle_organelle fission_peptidyl-amino acid modification_protein alkylation_regulation of cell cycle_regulation of organelle organization	NA	NA	DNA	other	0	280
YBR258C	SHG1	-0.183987	-0.241607	-0.156112	-0.108972	-0.5659	0.325802	0.553675	0.115336	0.292373	0.412504	Subunit of the COMPASS (Set1C) complex; COMPASS methylates histone H3 on lysine 4 and is required in transcriptional silencing near telomeres	COMPASS complex	chromatin organization_histone modification_peptidyl-amino acid modification_protein alkylation	NA	NA	DNA	other	0	281
YHR119W	SET1	-1.89524	-0.406844	-0.441418	-0.422445	-0.248638	0.888073	0.223298	0.180896	0.158496	0.442558	Histone methyltransferase, subunit of the COMPASS (Set1C) complex; COMPASS methylates histone H3K4; Set1p-dependent H3K4 trimethylation recruits Nrd1p, allowing efficient termination of snoRNAs and cryptic unstable transcripts (CUTs) by Nrd1p-Nab3p-Sen1p pathway; modulates histone acetylation levels in promoter proximal regions to ensure efficient Nrd1p-dependent termination; required in transcri…	COMPASS complex	chromatin organization_histone modification_meiotic cell cycle_organelle fission_peptidyl-amino acid modification_protein acylation_protein alkylation_regulation of cell cycle_regulation of organelle organization_regulation of protein modification process_sporulation_telomere organization_transcription from RNA polymerase II promoter	NA	NA	DNA	other	0	282
YDR469W	SDC1	0.0191677	-0.692375	-1.06757	-1.15321	-1.5256	0.679711	0.799252	0.952142	1.40376	0.340586	Subunit of the COMPASS (Set1C) complex; COMPASS methylates lysine 4 of histone H3 and is required in chromatin silencing at telomeres; contains a Dpy-30 domain that mediates interaction with Bre2p; similar to C. elegans and human DPY-30	COMPASS complex	chromatin organization_histone modification_peptidyl-amino acid modification_protein alkylation	NA	NA	DNA	other	0	283
YLR015W	BRE2	-0.40029	-0.451654	-0.795376	-0.409264	-0.86751	0.380192	0.381998	0.688955	0.765987	1.07369	Subunit of COMPASS (Set1C) complex; COMPASS methylates Lys4 of histone H3 and functions in silencing at telomeres; has a C-terminal Sdc1 Dpy-30 Interaction (SDI) domain that mediates binding to Sdc1p; similar to trithorax-group protein ASH2L	COMPASS complex	chromatin organization_histone modification_peptidyl-amino acid modification_protein alkylation_telomere organization	NA	NA	DNA	other	0	284
YJL168C	SET2	0.0742284	-0.20527	-0.103754	-0.0239076	0.331161	0.540434	0.664161	0.273433	0.24831	0.241824	Histone methyltransferase with a role in transcriptional elongation; methylates H3 lysine 36 (H3K36), which suppresses incorporation of acetylated histones and signals for the deacetylation of these histones within transcribed genes; associates with the C-terminal domain(CTD) of Rpo21p; H3K36me3 (trimethylation) requires Spt6p, proline 38 on H3, CTD of Rpo21p, Ctk1p, and C-terminal SRI domain of …	NA	DNA recombination_DNA replication_DNA-templated transcription, elongation_DNA-templated transcription, termination_chromatin organization_histone modification_meiotic cell cycle_organelle fission_peptidyl-amino acid modification_protein acylation_protein alkylation_regulation of DNA metabolic process_regulation of cell cycle_regulation of organelle organization_regulation of protein modification …	NA	NA	DNA	other	0	285
YCR033W	SNT1	-0.491157	-0.146725	-0.311444	-0.119094	0.0935146	0.521412	0.172372	0.094017	0.291007	0.133817	Subunit of the Set3C deacetylase complex; interacts directly with the Set3C subunit, Sif2p; putative DNA-binding protein; mutant has increased aneuploidy tolerance; relocalizes to the cytosol in response to hypoxia	Set3p complex	chromatin organization_histone modification_protein phosphorylation_regulation of protein modification process_signaling	NA	NA	DNA	other	0	286
YBR103W	SIF2	-0.201906	-0.343452	-0.292071	-0.00101638	-0.0419229	1.05607	0.318761	0.130241	0.107749	0.308187	WD40 repeat-containing subunit of Set3C histone deacetylase complex; complex represses early/middle sporulation genes; antagonizes telomeric silencing; binds specifically to the Sir4p N-terminus	Set3p complex	chromatin organization_histone modification_meiotic cell cycle_organelle fission_protein phosphorylation_regulation of cell cycle_regulation of organelle organization_regulation of protein modification process_signaling	NA	NA	DNA	other	0	287
YKR029C	SET3	-0.91299	-0.453969	0.0650889	-0.348822	-0.245444	1.43653	0.238751	0.129748	0.482203	0.685992	Defining member of the SET3 histone deacetylase complex; which is a meiosis-specific repressor of sporulation genes; necessary for efficient transcription by RNAPII; one of two yeast proteins that contains both SET and PHD domains; SET3 has a paralog, SET4, that arose from the whole genome duplication	Set3p complex	chromatin organization_histone modification_meiotic cell cycle_organelle fission_regulation of cell cycle_regulation of organelle organization	NA	NA	DNA	other	0	288
YIL112W	HOS4	-0.377108	-0.143589	-0.110142	-0.234183	-0.171419	0.836637	0.25441	0.0521775	0.209713	0.213806	Subunit of the Set3 complex; complex is a meiotic-specific repressor of sporulation specific genes that contains deacetylase activity; potential Cdc28p substrate	Set3p complex	chromatin organization_histone modification_meiotic cell cycle_organelle fission_regulation of cell cycle_regulation of organelle organization	NA	NA	DNA	other	0	289
YHR207C	SET5	0.0690222	-0.21525	-0.0752815	-0.239918	0.43852	0.306231	0.151628	0.176774	0.249364	0.570287	Methyltransferase involved in methylation of histone H4 Lys5, -8, -12; S-adenosylmethionine-dependent; zinc-finger protein, contains one canonical and two unusual fingers in unusual arrangements; deletion enhances replication of positive-strand RNA virus	NA	chromatin organization_histone modification_peptidyl-amino acid modification_protein alkylation	NA	NA	DNA	other	0	290
YDR227W	SIR4	0.0264282	-0.899602	-1.23117	-0.710483	-0.358703	1.2324	0.902835	1.74429	1.14823	1.07471	SIR protein involved in assembly of silent chromatin domains; silent information regulator (SIR) along with SIR2 and SIR3; involved in assembly of silent chromatin domains at telomeres and the silent mating-type loci; potentially phosphorylated by Cdc28p; some alleles of SIR4 prolong lifespan	chromatin silencing complex	chromatin organization	NA	yetfasco	DNA	other	0	291
YDL042C	SIR2	-0.0343489	-0.424272	-0.523474	-0.430145	-0.499773	0.656941	0.0841521	0.259213	0.267578	0.138182	Conserved NAD+ dependent histone deacetylase of the Sirtuin family; deacetylation targets are primarily nuclear proteins; involved in regulation of lifespan; plays roles in silencing at HML, HMR, telomeres, and the rDNA locus; negatively regulates initiation of DNA replication; functions as a regulator of autophagy like mammalian homolog SIRT1, and also of mitophagy	chromatin silencing complex_RENT complex	DNA recombination_DNA replication_chromatin organization_chromosome segregation_regulation of DNA metabolic process	NA	yetfasco	DNA	other	0	292
YLR442C	SIR3	-1.39528	-0.508666	-0.312691	-0.350744	-0.59878	0.586341	0.453827	0.445337	0.163975	0.28066	Silencing protein; interacts with Sir2p, Sir4p, and histone H3 and H4 tails to establish transcriptionally silent chromatin state; required for spreading of silenced chromatin; recruited to chromatin through interaction with Rap1p; C-terminus (residues 840-978) assumes variant winged helix-turn-helix (wH) fold that mediates homodimerization, which is critical for holo-SIR complex loading; SIR3 ha…	chromatin silencing complex	RNA catabolic process_chromatin organization	NA	yetfasco	RNA	other	6	293
YJL127C	SPT10	-0.229753	-0.325962	-0.332987	-0.478561	-0.00706214	0.515754	0.363073	0.211211	0.663826	0.377291	Histone H3 acetylase with a role in transcriptional regulation; sequence-specific activator of histone genes, binds specifically and cooperatively to pairs of UAS elements in core histone promoters, functions at or near TATA box; involved in S phase-specific acetylation of H3K56 at histone promoters, which is required for recruitment of SWI/SNF nucleosome remodeling complex and subsequent transcr…	NA	DNA repair_cellular response to DNA damage stimulus_chromatin organization_histone modification_peptidyl-amino acid modification_protein acylation_transcription from RNA polymerase II promoter	NA	yetfasco	DNA	other	0	294
YOR279C	RFM1	0.0492989	0.392231	0.462513	0.572619	0.226382	0.133096	0.106632	0.388752	0.222316	0.0424489	Component of the Sum1p-Rfm1p-Hst1p complex; Rfm1p tethers the Hst1p histone deacetylase to the DNA-binding protein Sum1p; complex is involved in transcriptional repression of middle sporulation genes and in initiation of DNA replication	Sum1p/Rfm1p/Hst1p complex	DNA replication_regulation of DNA metabolic process_transcription from RNA polymerase II promoter	NA	NA	DNA	other	0	295
YOL068C	HST1	-1.09659	0.112096	0.28166	0.220267	0.217742	1.14929	0.903177	0.575115	1.27967	1.43807	NAD(+)-dependent histone deacetylase; essential subunit of the Sum1p/Rfm1p/Hst1p complex required for ORC-dependent silencing and mitotic repression; non-essential subunit of the Set3C deacetylase complex; involved in telomere maintenance; HST1 has a paralog, SIR2, that arose from the whole genome duplication	Set3p complex_Sum1p/Rfm1p/Hst1p complex	DNA recombination_chromatin organization_histone modification_regulation of DNA metabolic process	NA	NA	DNA	other	6	296
YDR310C	SUM1	1.21335	0.867705	0.943606	1.82504	1.42838	NA	NA	NA	NA	NA	Transcriptional repressor that regulates middle-sporulation genes; required for mitotic repression of middle sporulation-specific genes; also acts as general replication initiation factor; involved in telomere maintenance, chromatin silencing; regulated by pachytene checkpoint	Sum1p/Rfm1p/Hst1p complex	DNA replication_chromatin organization_regulation of DNA metabolic process_transcription from RNA polymerase II promoter	NA	yetfasco	DNA	other	6	297
YNL186W	UBP10	-0.301814	-0.18777	-0.212485	-0.310432	-0.433761	0.755231	0.106421	0.265293	0.355868	1.07997	Ubiquitin-specific protease, deubiquitinates Ub-protein moieties; interacts with proteins that function in rRNA production and ribosome biogenesis via its intrinsically disordered regions; stabilizes Rpa190p by deubiquitination; controls PCNA deubiquitylation; may regulate silencing by acting on Sir4p; involved in posttranscriptionally regulating Gap1p, possibly other transporters; localized to t…	NA	chromatin organization_histone modification_protein modification by small protein conjugation or removal	NA	NA	DNA	other	0	298
YPR018W	RLF2	0.0815433	-0.446798	-0.525688	-0.377158	-0.674906	0.793268	0.391168	0.153377	0.436198	0.761739	Largest subunit (p90) of the Chromatin Assembly Complex (CAF-1); chromatin assembly by CAF-1 is important for multiple processes including silencing at telomeres, mating type loci, and rDNA; maintenance of kinetochore structure; deactivation of the DNA damage checkpoint after DNA repair; chromatin dynamics during transcription; and repression of divergent noncoding transcription	chromatin assembly complex	chromatin organization	NA	NA	DNA	other	0	299
YML102W	CAC2	-0.627211	-0.163676	-0.349975	-0.0706792	0.0541311	0.164741	0.277045	0.302031	0.281481	0.14298	Subunit of chromatin assembly factor I (CAF-1), with Rlf2p and Msi1p; chromatin assembly by CAF-1 is important for multiple processes including silencing at telomeres, mating type loci, and rDNA; maintenance of kinetochore structure, deactivation of the DNA damage checkpoint after DNA repair, chromatin dynamics during transcription; and repression of divergent transcription; relocalizes to the cy…	chromatin assembly complex	chromatin organization	NA	NA	DNA	other	0	300
YBR195C	MSI1	0.557061	-0.892127	-0.456966	-0.352214	-0.505886	0.664439	0.174853	0.383603	0.222557	0.0770626	Subunit of chromatin assembly factor I (CAF-1); chromatin assembly by CAF-1 affects multiple processes including silencing at telomeres, mating type loci, and rDNA; maintenance of kinetochore structure; deactivation of DNA damage checkpoint after DNA repair; chromatin dynamics during transcription; and repression of divergent noncoding transcription; Msi1p localizes to nucleus and cytoplasm and i…	chromatin assembly complex	chromatin organization	NA	NA	DNA	other	6	301
YER030W	CHZ1	2.90827	-0.296322	1.1381	0.30714	3.82891	NA	NA	NA	NA	NA	Histone chaperone for Htz1p/H2A-H2B dimer; required for the stabilization of the Chz1p-Htz1-H2B complex; has overlapping function with Nap1p; null mutant displays weak sensitivity to MMS and benomyl; contains a highly conserved CHZ motif; protein abundance increases in response to DNA replication stress	Chz1p/Htz1p/Htb1p complex	chromatin organization	NA	NA	DNA	other	0	302
YJR140C	HIR3	-0.381486	-0.0972499	0.237342	-0.119279	-0.612946	0.649855	0.441397	0.262029	0.212432	0.500439	Subunit of the HIR complex; a nucleosome assembly complex involved in regulation of histone gene transcription; involved in position-dependent gene silencing and nucleosome reassembly; ortholog of human CABIN1 protein	HIR complex	DNA-templated transcription, elongation_chromatin organization_histone modification_mitotic cell cycle_peptidyl-amino acid modification_protein acylation_regulation of protein modification process_transcription from RNA polymerase II promoter	NA	yetfasco	DNA	other	6	303
YBR215W	HPC2	-0.347149	0.216412	0.211717	0.159066	-0.285571	0.606879	0.19478	0.184473	0.243453	1.08902	Subunit of the HIR complex; HIR is a nucleosome assembly complex involved in regulation of histone gene transcription; mutants display synthetic defects with subunits of FACT, a complex that allows passage of RNA Pol II through nucleosomes	HIR complex	DNA-templated transcription, elongation_chromatin organization_mitotic cell cycle_transcription from RNA polymerase II promoter	NA	NA	DNA	other	6	304
YOR038C	HIR2	0.315451	0.185812	0.172549	0.292996	0.0988822	0.534621	0.120417	0.212504	0.477252	0.603475	Subunit of HIR nucleosome assembly complex; involved in regulation of histone gene transcription; recruits Swi-Snf complexes to histone gene promoters; promotes heterochromatic gene silencing with Asf1p; relocalizes to the cytosol in response to hypoxia	HIR complex	DNA-templated transcription, elongation_chromatin organization_transcription from RNA polymerase II promoter	NA	yetfasco	DNA	other	6	305
YBL008W	HIR1	-0.416208	-0.109618	-0.137701	-0.146827	-0.318989	0.377054	0.283317	0.105381	0.123794	0.310586	Subunit of the HIR complex; HIR is a nucleosome assembly complex involved in regulation of histone gene transcription; contributes to nucleosome formation, heterochromatic gene silencing, and formation of functional kinetochores	HIR complex	DNA-templated transcription, elongation_chromatin organization_transcription from RNA polymerase II promoter	NA	yetfasco	DNA	other	6	306
YKR048C	NAP1	-0.166024	-0.164654	-0.487284	-0.253611	-0.085849	NA	NA	NA	NA	NA	Histone chaperone; involved in histone exchange by removing and replacing histone H2A-H2B dimers or histone variant dimers from assembled nucleosomes; involved in the transport of H2A and H2B histones to the nucleus; required for the regulation of microtubule dynamics during mitosis; interacts with mitotic cyclin Clb2p; controls bud morphogenesis; phosphorylated by CK2; protein abundance increase…	NA	DNA-templated transcription, elongation_cell budding_chromatin organization_cytoskeleton organization_nuclear transport_protein complex biogenesis_protein targeting_regulation of organelle organization_transcription from RNA polymerase II promoter	NA	NA	DNA	other	0	307
YPL153C	RAD53	0.0196073	-0.414387	-0.032457	-0.463035	-0.228395	0.870572	0.519184	0.0847104	0.159968	0.407151	DNA damage response protein kinase; required for cell-cycle arrest in response to DNA damage; activated by trans autophosphorylation when interacting with hyperphosphorylated Rad9p; activates downstream kinase Dun1p; differentially senses mtDNA depletion and mitochondrial ROS; needed for regulation of copper genes in response to DNA-damaging agents; relocalizes to cytosol in response to hypoxia; …	Rad53p/Asf1p complex	DNA repair_DNA replication_cellular response to DNA damage stimulus_nucleobase-containing small molecule metabolic process_protein phosphorylation_regulation of cell cycle	NA	NA	DNA	other	0	308
YJL115W	ASF1	-0.24576	0.423862	0.844997	0.669646	0.205434	0.552989	0.0707145	0.191616	0.230405	0.417049	Nucleosome assembly factor; involved in chromatin assembly, disassembly; role in H3K56 acetylation required for expression homeostasis, buffering of mRNA synthesis rate against changes in gene dosage during S phase; anti-silencing protein, causes derepression of silent loci when overexpressed; role in regulating Ty1 transposition; relocalizes to cytosol under hypoxia; growth defect of asf1 null m…	Rad53p/Asf1p complex	DNA-templated transcription, elongation_chromatin organization_histone modification_peptidyl-amino acid modification_protein acylation_protein modification by small protein conjugation or removal_protein phosphorylation_regulation of protein modification process_transcription from RNA polymerase II promoter	NA	NA	DNA	other	6	309
YNL206C	RTT106	-1.00863	0.337917	0.322007	0.0831019	0.392878	0.68262	0.349687	0.264318	0.301466	0.22251	Histone chaperone; involved in regulation of chromatin structure in both transcribed and silenced chromosomal regions; affects transcriptional elongation; has a role in regulation of Ty1 transposition; interacts physically and functionally with Chromatin Assembly Factor-1 (CAF-1)	NA	DNA-templated transcription, elongation_chromatin organization_transcription from RNA polymerase II promoter	NA	NA	DNA	other	6	310
YNL246W	VPS75	0.369486	0.084702	0.112441	-0.14535	-0.0338043	0.734039	0.39591	0.413381	0.391459	0.171695	NAP family histone chaperone; binds to histones and Rtt109p, stimulating histone acetyltransferase activity; possesses nucleosome assembly activity in vitro; proposed role in vacuolar protein sorting and in double-strand break repair; protein abundance increases in response to DNA replication stress; relocalizes to the cytosol in response to hypoxia	Rtt109p/Vps75p complex	DNA repair_cellular response to DNA damage stimulus_chromatin organization_histone modification_peptidyl-amino acid modification_protein acylation_regulation of protein modification process	NA	NA	DNA	other	0	311
YLL002W	RTT109	-0.449179	-0.604683	-0.534765	-0.536786	-0.544145	0.232718	0.450666	0.464214	1.11964	1.21409	Histone acetyltransferase; critical for cell survival in presence of DNA damage during S phase; acetylates H3K56, H3K9; H3K56 acetylation activity required for expression homeostasis, buffering of mRNA synthesis rate against changes in gene dosage during S phase; involved in non-homologous end joining and regulation of Ty1 transposition; prevents hyper-amplification of rDNA; interacts physically …	Rtt109p/Vps75p complex	DNA repair_cellular response to DNA damage stimulus_chromatin organization_histone modification_peptidyl-amino acid modification_protein acylation_regulation of DNA metabolic process_transcription from RNA polymerase II promoter_transposition	NA	NA	DNA	other	0	312
YER177W	BMH1	0.151442	0.712901	0.732849	0.232557	-0.444064	0.493232	0.294071	0.207152	0.754238	0.825961	14-3-3 protein, major isoform; controls proteome at post-transcriptional level, binds proteins and DNA, involved in regulation of exocytosis, vesicle transport, Ras/MAPK and rapamycin-sensitive signaling, aggresome formation, spindle position checkpoint; protein increases in abundance and relative distribution to the nucleus increases upon DNA replication stress; antiapoptotic gene similar to hum…	NA	carbohydrate metabolic process_cell wall organization or biogenesis_cellular response to DNA damage stimulus_chromosome segregation_generation of precursor metabolites and energy_meiotic cell cycle_mitotic cell cycle_organelle fission_protein modification by small protein conjugation or removal_pseudohyphal growth_regulation of cell cycle_regulation of organelle organization_regulation of protein…	NA	NA	DNA	other	0	313
YDR099W	BMH2	0.00470199	0.453719	0.164729	0.159347	0.133943	0.260435	0.350912	0.161475	0.573069	0.523756	14-3-3 protein, minor isoform; controls proteome at post-transcriptional level, binds proteins and DNA, involved in regulation of many processes including exocytosis, vesicle transport, Ras/MAPK signaling, and rapamycin-sensitive signaling; protein increases in abundance and relative distribution to the nucleus increases upon DNA replication stress; abundance relative to Bmh1p increases during sp…	NA	DNA replication_carbohydrate metabolic process_cell wall organization or biogenesis_cellular response to DNA damage stimulus_generation of precursor metabolites and energy_meiotic cell cycle_mitotic cell cycle_protein modification by small protein conjugation or removal_pseudohyphal growth_regulation of cell cycle_regulation of protein modification process_signaling_sporulation	NA	NA	DNA	other	0	314
YGL240W	DOC1	-0.845493	-0.201238	-0.296705	-0.397374	-0.341262	0.79167	0.610763	0.262336	0.221733	0.046444	Processivity factor; required for the ubiquitination activity of the anaphase promoting complex (APC), mediates the activity of the APC by contributing to substrate recognition; involved in cyclin proteolysis; contains a conserved DOC1 homology domain	anaphase-promoting complex	chromatin organization_protein modification by small protein conjugation or removal_proteolysis involved in cellular protein catabolic process_regulation of protein modification process	NA	NA	DNA	other	0	315
YFR036W	CDC26	-0.0352696	-0.393375	-0.465145	-0.795071	-0.568957	0.853524	0.627773	0.44262	0.25752	0.300793	Subunit of the Anaphase-Promoting Complex/Cyclosome (APC/C); which is a ubiquitin-protein ligase required for degradation of anaphase inhibitors, including mitotic cyclins, during the metaphase/anaphase transition; relocalizes to the cytosol in response to hypoxia	anaphase-promoting complex	chromatin organization_protein modification by small protein conjugation or removal_proteolysis involved in cellular protein catabolic process	NA	NA	DNA	other	0	316
YKL022C	CDC16	-1.21177	-0.457701	-0.349425	-0.489105	-0.274385	2.01193	0.34642	0.216263	0.347326	0.437401	Subunit of the anaphase-promoting complex/cyclosome (APC/C); which is a ubiquitin-protein ligase required for degradation of anaphase inhibitors, including mitotic cyclins, during the metaphase/anaphase transition; required for sporulation; relocalizes to the cytosol in response to hypoxia	anaphase-promoting complex	DNA replication_protein modification by small protein conjugation or removal_proteolysis involved in cellular protein catabolic process_regulation of DNA metabolic process	NA	NA	DNA	other	0	317
YGL060W	YBP2	-0.558393	-0.19172	-0.403051	-0.209542	-0.25923	0.625819	0.308139	0.234637	0.224644	0.101759	Central kinetochore associated protein; mediates mitotic progression; interacts with several central kinetochore proteins and centromeric histone Cse4p; role in resistance to oxidative stress; similar to Slk19p; YBP2 has a paralog, YBP1, that arose from the whole genome duplication	NA	cytoskeleton organization_mitotic cell cycle	NA	NA	other	other	0	318
YMR117C	SPC24	-0.628792	-0.553678	-0.394793	-0.229519	-0.193744	0.518266	0.617035	0.589943	0.222437	0.884222	Component of the kinetochore-associated Ndc80 complex; involved in chromosome segregation, spindle checkpoint activity, and kinetochore clustering; evolutionarily conserved; other members include Ndc80p, Nuf2p, Spc24p, and Spc25p	Ndc80p complex	chromosome segregation_cytoskeleton organization_protein complex biogenesis	NA	NA	DNA	other	0	319
YDL139C	SCM3	NA	NA	NA	NA	NA	NA	NA	NA	NA	NA	Nonhistone component of centromeric chromatin; binds to histone H3 variant, Cse4p, and recruits it to centromeres; involved in the assembly and maintenance of Cse4-H4 at centromeres; required for kinetochore assembly and G2/M progression; may protect Cse4p from ubiquitylation; homolog of mammalian HJURP	NA	chromosome segregation_mitotic cell cycle_organelle assembly_protein complex biogenesis_protein modification by small protein conjugation or removal_proteolysis involved in cellular protein catabolic process_regulation of protein modification process	NA	NA	DNA	other	0	320
YDR318W	MCM21	-0.495307	-0.592704	-0.479092	-0.252142	-0.18672	0.837243	0.292069	0.11699	0.295739	0.290243	Component of the kinetochore sub-complex COMA; COMA (Ctf19p, Okp1p, Mcm21p, Ame1p) bridges kinetochore subunits in contact with centromeric DNA with subunits bound to microtubules during kinetochore assembly; involved in minichromosome maintenance; modified by sumoylation; orthologous to human centromere constitutive-associated network (CCAN) subunit CENP-O and fission yeast mal2	COMA complex	DNA recombination_chromosome segregation_meiotic cell cycle_mitotic cell cycle_organelle fission_regulation of DNA metabolic process_regulation of cell cycle_regulation of organelle organization	NA	NA	DNA	other	0	321
YDR532C	KRE28	NA	NA	NA	NA	NA	NA	NA	NA	NA	NA	Subunit of a kinetochore-microtubule binding complex; complex bridges centromeric heterochromatin and kinetochore MAPs and motors; required for sister chromatid bi-orientation and kinetochore binding of SAC components; complex also includes Spc105p; modified by sumoylation	NA	biological_process	NA	NA	other	other	0	322
YPL209C	IPL1	-1.06513	-0.943319	-0.99302	-1.03435	-0.862925	0.946568	0.229618	0.3314	0.396145	0.857053	Aurora kinase of chromosomal passenger complex; mediates release of mono-oriented kinetochores from microtubules in meiosis I, and kinetochore release from SPB clusters at meiotic exit; helps maintain condensed chromosomes during anaphase; required for SPB cohesion and prevention of multipolar spindle formation; promotes telomerase release at G2/M; Iocalizes to nuclear foci that diffuse upon DNA …	Aurora B-INCENP protein kinase complex	chromosome segregation_cytokinesis_cytoskeleton organization_meiotic cell cycle_mitotic cell cycle_organelle assembly_organelle fission_peptidyl-amino acid modification_protein phosphorylation_regulation of cell cycle_regulation of organelle organization	NA	NA	DNA	other	0	323
YIR010W	DSN1	-0.720849	-0.454767	-0.530105	-0.243387	-0.130381	0.602435	0.165784	0.216834	0.117368	0.258097	Essential component of the MIND kinetochore complex; joins kinetochore subunits contacting DNA to those contacting microtubules; phosphorylation of Dsn1p promotes interaction between outer and inner kinetochore proteins; N-terminal end interacts with monopolin subunit Csm1p and is essential for meiotic but not mitotic chromosome segregation; important for chromosome segregation; complex consists …	MIND complex	chromosome segregation_meiotic cell cycle_organelle fission	NA	NA	DNA	other	0	324
YLR223C	IFH1	0.491079	-0.061867	-0.231307	-0.0933773	-0.32163	0.402687	0.289162	0.291675	0.421727	0.307336	Coactivator, regulates transcription of ribosomal protein (RP) genes; recruited to RP gene promoters during optimal growth conditions via Fhl1p; subunit of CURI, a complex that coordinates RP production and pre-rRNA processing; regulated by acetylation and phosphorylation at different growth states via TORC1 signaling; IFH1 has a paralog, CRF1, that arose from the whole genome duplication	CURI complex	chromatin organization_transcription from RNA polymerase II promoter	NA	yetfasco	DNA	other	0	325
YOL104C	NDJ1	-0.0638455	-0.569867	-0.445638	-0.289848	0.127554	0.695275	0.133294	0.224781	0.372714	0.52635	Protein that regulates meiotic SPB cohesion and telomere clustering; localizes to both spindle pole bodies (SPBs) and telomeres; required for bouquet formation, effective homolog pairing, ordered cross-over distribution, sister chromatid cohesion at meiotic telomeres, chromosomal segregation and telomere-led rapid prophase movement	NA	DNA recombination_chromosome segregation_meiotic cell cycle_organelle fission_regulation of DNA metabolic process_regulation of cell cycle_regulation of organelle organization	NA	NA	DNA	other	0	326
YBR057C	MUM2	-0.604513	-0.177024	-0.147457	-0.253678	-0.0737634	0.29075	0.2813	0.365746	0.303177	0.476688	Protein essential for meiotic DNA replication and sporulation; cytoplasmic protein; subunit of the MIS complex which controls mRNA methylation during during the induction of sporulation; also interacts with Orc2p, which is a component of the origin recognition complex	NA	DNA replication_RNA modification_meiotic cell cycle_organelle fission_pseudohyphal growth	NA	NA	RNA	other	0	327
YDR439W	LRS4	-0.23979	-0.325831	-0.744883	-0.240641	-0.497888	0.325714	0.158175	0.207754	0.478759	0.4515	Nucleolar protein that forms a complex with Csm1p; and then Mam1p at kinetochores during meiosis I to mediate accurate homolog segregation; required for condensin recruitment to the replication fork barrier site and rDNA repeat segregation	Csm1p/Lrs4p complex_monopolin complex	chromatin organization_chromosome segregation_meiotic cell cycle_nucleus organization_organelle fission	NA	NA	DNA	other	0	328
YPL204W	HRR25	-0.356021	-0.0227368	-0.321169	0.0217279	0.603921	NA	0.158691	0.40787	0.470388	0.625208	Conserved protein kinase; involved in regulating diverse events such as vesicular trafficking, DNA repair, Cvt pathway, chromosome segregation, ribosomal small and large subunit biogenesis; binds CTD of RNAPII; phosphorylates COPII coat; interacts with Sit4p phosphatase; antagonizes calcineurin signaling by negatively regulating nuclear localization of stress-response transcription factor Crz1p; …	monopolin complex	DNA repair_Golgi vesicle transport_RNA modification_cellular response to DNA damage stimulus_chromosome segregation_endocytosis_meiotic cell cycle_organelle fission_peptidyl-amino acid modification_protein phosphorylation_protein targeting_regulation of transport_ribosomal large subunit biogenesis_ribosomal small subunit biogenesis_tRNA processing	NA	NA	RNA	other	0	329
YCR086W	CSM1	-0.0264788	-0.972507	-0.60236	-0.726355	-0.993776	NA	0.590042	0.377223	0.479248	0.478035	Nucleolar protein that mediates homolog segregation during meiosis I; forms a complex with Lrs4p and then Mam1p at kinetochores; required for condensin recruitment to the replication fork barrier site and rDNA repeat segregation	Csm1p/Lrs4p complex_monopolin complex	chromosome segregation_meiotic cell cycle_nucleus organization_organelle fission	NA	NA	DNA	other	0	330
YDL116W	NUP84	-0.378279	-0.717734	-0.485227	-0.713653	-0.59327	0.722333	0.284585	0.377943	0.913156	0.812612	Subunit of the Nup84p subcomplex of the nuclear pore complex (NPC); contributes to nucleocytoplasmic transport and NPC biogenesis; also plays roles in several processes that may require localization of genes or chromosomes at the nuclear periphery, including double-strand break repair, transcription and chromatin silencing; homologous to human NUP107	Nup84p complex	DNA repair_cellular response to DNA damage stimulus_chromatin organization_nuclear transport_nucleobase-containing compound transport_nucleus organization_protein targeting_response to heat_transcription from RNA polymerase II promoter	NA	NA	DNA	other	0	331
YAR002W	NUP60	0.486389	-0.716873	-0.346033	-0.70684	-0.237697	0.885797	0.412777	0.138099	0.369607	0.0883232	FG-nucleoporin component of central core of the nuclear pore complex; contributes directly to nucleocytoplasmic transport and maintenance of the nuclear pore complex (NPC) permeability barrier and is involved in gene tethering at the nuclear periphery; relocalizes to the cytosol in response to hypoxia; both NUP1 and NUP60 are homologous to human NUP153	NA	DNA repair_cellular response to DNA damage stimulus_chromatin organization_nuclear transport_nucleobase-containing compound transport_peptidyl-amino acid modification_protein modification by small protein conjugation or removal_protein targeting_regulation of protein modification process_response to heat	NA	NA	DNA	other	0	332
YBL079W	NUP170	-0.389729	-1.0496	-0.555701	-1.18036	-1.06504	0.906007	0.43866	0.153846	0.695812	0.283829	Subunit of inner ring of nuclear pore complex (NPC); contributes to NPC assembly and nucleocytoplasmic transport; interacts with genomic regions that contain ribosomal protein and subtelomeric genes, where it functions in nucleosome positioning and as a repressor of transcription; both Nup170p and NUP157p are similar to human Nup155p; NUP170 has a paralog, NUP157, that arose from the whole genome…	karyopherin docking subcomplex of the Nuclear Pore Complex (NPC)	chromatin organization_chromosome segregation_nuclear transport_nucleus organization_protein complex biogenesis_protein targeting	NA	NA	DNA	other	0	333
YGL092W	NUP145	-0.894374	-0.392121	-0.793889	-0.433508	0.0731206	0.971192	0.136599	0.732011	0.273958	0.144511	Essential protein with distinct roles in two nuclear pore subcomplexes; catalyzes its own proteolytic cleavage in vivo to generate a C-terminal fragment that is a structural component of the Nup84p subcomplex (with roles in NPC biogenesis and localization of genes to the nuclear periphery), and an N-terminal fragment that is one of several FG-nucleoporins within the NPC central core directly resp…	Nup84p complex	DNA repair_cellular response to DNA damage stimulus_chromatin organization_nuclear transport_nucleobase-containing compound transport_nucleus organization_protein targeting_regulation of transport	NA	NA	DNA	other	0	334
YKR082W	NUP133	-0.643898	-0.214119	-0.31836	0.12366	0.30275	0.457433	0.320747	0.460856	0.100629	0.310383	Subunit of Nup84p subcomplex of nuclear pore complex (NPC); contributes to nucleocytoplasmic transport, NPC biogenesis; is involved in establishment of a normal nucleocytoplasmic concentration gradient of GTPase Gsp1p; also plays roles in several processes that may require localization of genes or chromosomes at nuclear periphery, including double-strand break repair, transcription and chromatin …	NA	DNA repair_cellular response to DNA damage stimulus_chromatin organization_nuclear transport_nucleobase-containing compound transport_nucleus organization_protein targeting_response to heat_transcription from RNA polymerase II promoter	NA	NA	DNA	other	0	335
YIL122W	POG1	-0.257073	-0.0797101	-0.281546	-0.594213	-0.443826	NA	NA	NA	NA	NA	Nuclear chromatin-associated protein of unknown function; may have a role in cell cycle regulation; overexpression promotes recovery from pheromone induced arrest and suppresses the stress sensitivity caused by a mutation in the E3 ubiquitin ligase Rsp5p; binds upstream of BAR1 and cell cycle-related genes; phsosphoylated form may be ubiquitinated by Dma2p; potential Cdc28p substrate; SBF regulat…	NA	conjugation_response to chemical_signaling_transcription from RNA polymerase II promoter	NA	NA	DNA	other	0	336
YJL076W	NET1	-0.981738	-0.916002	-0.709278	-0.432261	-0.18388	0.931156	0.393856	0.531027	0.205364	0.406973	Core subunit of the RENT complex; involved in nucleolar silencing and telophase exit; stimulates transcription by RNA polymerase I and regulates nucleolar structure; NET1 has a paralog, TOF2, that arose from the whole genome duplication	RENT complex	chromatin organization_mitotic cell cycle_nucleus organization_organelle fission_regulation of cell cycle_regulation of organelle organization	NA	NA	DNA	other	0	337
YFR028C	CDC14	-0.803727	-0.375291	-0.303096	-0.221771	0.234388	1.11709	0.513202	0.274309	0.175913	0.413744	Protein phosphatase required for mitotic exit; required for rDNA segregation, cytokinesis, meiosis I spindle disassembly, environmental stress response; held in nucleolus by Cdc55p in early meiosis, liberated by FEAR and Mitotic Exit Network in anaphase, enabling it to effect a decrease in CDK/B-cyclin activity and mitotic exit; sequestered in metaphase II, released upon entry into anaphase II; h…	RENT complex	chromosome segregation_cytokinesis_cytoskeleton organization_meiotic cell cycle_mitotic cell cycle_organelle fission_protein dephosphorylation_regulation of cell cycle_regulation of organelle organization_response to osmotic stress	NA	NA	DNA	other	0	338
YBR275C	RIF1	-1.10731	-0.35364	-0.395629	-0.212929	0.498934	0.932985	0.292871	0.36868	0.147417	0.583299	Protein that binds to the Rap1p C-terminus; acts synergistically with Rif2p to help control telomere length and establish telomeric silencing; involved in control of DNA replication; contributes to resection of DNA double strand breaks (DSBs); deletion results in telomere elongation	NA	DNA repair_DNA replication_cellular response to DNA damage stimulus_chromatin organization_telomere organization	NA	NA	DNA	other	0	339
YLR453C	RIF2	0.137028	-0.213092	-0.751082	-0.364885	-0.255246	0.133628	0.0913059	0.0890763	0.247129	0.45973	Protein that binds to the Rap1p C-terminus; acts synergistically with Rif1p to help control telomere length and establish telomeric silencing; deletion results in telomere elongation; RIF2 has a paralog, ORC4, that arose from the whole genome duplication	NA	telomere organization	NA	NA	other	other	0	340
YIL132C	CSM2	-1.63566	-0.622331	-0.71736	-0.446597	-0.251222	NA	0.173231	0.344981	0.378425	0.234319	Component of Shu complex (aka PCSS complex); Shu complex also includes Psy3, Shu1, Shu2, and promotes error-free DNA repair,; Shu complex mediates inhibition of Srs2p function; promotes formation of Rad51p filaments; Psy3p and Csm2p contain similar DNA-binding regions which work together to form a single DNA binding site; required for accurate chromosome segregation during meiosis	NA	DNA recombination_DNA repair_cellular response to DNA damage stimulus_chromosome segregation_meiotic cell cycle_organelle fission	NA	NA	DNA	other	0	341
YLR383W	SMC6	-0.219982	-0.120842	-0.256424	-0.231027	-0.245475	NA	NA	NA	NA	NA	Component of the SMC5-SMC6 complex; this complex plays a key role in the removal of X-shaped DNA structures that arise between sister chromatids during DNA replication and repair; homologous to S. pombe rad18	smc5p-Smc6p complex	DNA recombination_DNA repair_cellular response to DNA damage stimulus_chromosome segregation	NA	NA	DNA	other	0	342
YOL034W	SMC5	0.0409975	-0.366179	-0.609046	-0.230146	0.400082	0.481152	0.536104	0.574105	0.416316	0.543593	Component of the SMC5-SMC6 complex; this complex plays a key role in the removal of X-shaped DNA structures that arise between sister chromatids during DNA replication and repair; binds single-stranded DNA and has ATPase activity; S. pombe homolog forms a heterodimer with S. pombe Rad18p that is involved in DNA repair	smc5p-Smc6p complex	DNA recombination_DNA repair_cellular response to DNA damage stimulus_chromosome segregation	NA	NA	DNA	other	0	343
YML023C	NSE5	-1.16327	-0.310039	-0.20103	-0.094173	-0.193773	0.953235	0.314428	0.321669	0.060832	0.40297	Component of the SMC5-SMC6 complex; this complex plays a key role in the removal of X-shaped DNA structures that arise between sister chromatids during DNA replication and repair	smc5p-Smc6p complex	DNA repair_cellular response to DNA damage stimulus	NA	NA	DNA	other	0	344
YDL105W	NSE4	-0.739828	-0.12953	-0.329384	-0.744671	-1.01529	1.29606	0.540264	0.417556	1.1231	0.885931	Component of the SMC5-SMC6 complex; this complex plays a key role in the removal of X-shaped DNA structures that arise between sister chromatids during DNA replication and repair	smc5p-Smc6p complex	DNA repair_cellular response to DNA damage stimulus	NA	NA	DNA	other	0	345
YDR288W	NSE3	-0.329993	-0.50275	-0.256337	-0.355667	-0.418033	0.952375	0.135921	0.322335	0.251603	0.782898	Component of the SMC5-SMC6 complex; this complex plays a key role in the removal of X-shaped DNA structures that arise between sister chromatids during DNA replication and repair; protein abundance increases in response to DNA replication stress	smc5p-Smc6p complex	DNA repair_cellular response to DNA damage stimulus	NA	NA	DNA	other	0	346
YEL019C	MMS21	-0.36887	-0.195443	0.00709398	-0.0322038	-0.279071	0.498466	0.333896	0.127004	0.37613	0.197211	SUMO ligase and component of the SMC5-SMC6 complex; this complex plays a key role in the removal of X-shaped DNA structures that arise between sister chromatids during DNA replication and repair; required for efficient sister chromatid cohesion; mutants are sensitive to methyl methanesulfonate and show increased spontaneous mutation and mitotic recombination; SUMOylates and inhibits Snf1p function	smc5p-Smc6p complex	DNA repair_cellular response to DNA damage stimulus	NA	NA	DNA	other	0	347
YER038C	KRE29	-0.534409	-0.677755	-0.167316	-0.279424	-0.131464	0.0259704	0.327809	0.0369979	0.201367	0.148056	Subunit of the SMC5-SMC6 complex; this complex is involved in removal of X-shaped DNA structures that arise between sister chromatids during DNA replication and repair; heterozygous mutant shows haploinsufficiency in K1 killer toxin resistance	smc5p-Smc6p complex	DNA repair_cellular response to DNA damage stimulus	NA	NA	DNA	other	0	348
YGR270W	YTA7	0.282442	0.419025	0.894959	0.536139	-0.725399	1.38095	0.27391	0.201528	0.205327	0.293462	Protein that localizes to chromatin; has a role in regulation of histone gene expression; has a bromodomain-like region that interacts with the N-terminal tail of histone H3, and an ATPase domain; relocalizes to the cytosol in response to hypoxia; potentially phosphorylated by Cdc28p	NA	chromatin organization_invasive growth in response to glucose limitation_transcription from RNA polymerase II promoter	NA	NA	DNA	other	6	349
YKR010C	TOF2	-0.443026	-0.457286	-0.516012	-0.167636	-0.0416978	0.278109	0.0650894	0.399404	0.373419	0.26205	Protein required for rDNA silencing and mitotic rDNA condensation; stimulates Cdc14p phosphatase activity and biphasic release to promote rDNA repeat segregation; required for condensin recruitment to the replication fork barrier site; TOF2 has a paralog, NET1, that arose from the whole genome duplication	NA	chromatin organization_nucleus organization	NA	NA	DNA	other	0	350
YPR104C	FHL1	0.36517	-0.517738	-0.466854	-0.389859	-0.231879	0.733326	0.5098	0.829162	0.208682	0.294302	Regulator of ribosomal protein (RP) transcription; has forkhead associated domain that binds phosphorylated proteins; recruits coactivator Ifh1p or corepressor Crf1p to RP gene promoters; also has forkhead DNA-binding domain though in vitro DNA binding assays give inconsistent results; computational analyses suggest it binds DNA directly at highly active RP genes and indirectly through Rap1p moti…	NA	transcription from RNA polymerase II promoter	NA	yetfasco	DNA	other	0	351
YOL017W	ESC8	-0.261779	-0.245866	-0.338195	-0.387781	-0.077927	0.376181	0.142549	0.097455	0.264234	0.585299	Protein involved in telomeric and mating-type locus silencing; interacts with Sir2p and also interacts with Gal11p, which is a component of the RNA pol II mediator complex; ESC8 has a paralog, IOC3, that arose from the whole genome duplication	NA	chromatin organization_chromosome segregation	NA	NA	DNA	other	0	352
YDL156W	CMR1	-0.132444	0.0620085	0.21167	0.00494368	0.00629932	1.50217	0.130289	0.29798	0.175654	0.875878	Nuclear protein with a role in protein quality control; localizes to the intranuclear quality control compartment (INQ) in response to proteasome inhibition or DNA replication stress; INQ likely sequesters proteins involved in DNA metabolism for degradation or re-folding; DNA-binding protein with preference for UV-damaged DNA; contains three WD domains (WD-40 repeat); human ortholog WDR76 also ex…	NA	cellular response to DNA damage stimulus_regulation of cell cycle	NA	NA	DNA	other	0	353
YGL029W	CGR1	0.171898	0.471607	0.275228	0.6094	0.46544	NA	0.193885	0.513537	0.288463	0.710968	Protein involved in nucleolar integrity and processing of pre-rRNA; has a role in processing rRNA for the 60S ribosome subunit; transcript is induced in response to cytotoxic stress but not genotoxic stress; relocalizes from nucleus to nucleolus upon DNA replication stress	NA	rRNA processing	NA	NA	RNA	other	0	354
YDL197C	ASF2	-0.450237	-0.412801	-0.168028	-0.477433	-0.414261	0.841749	0.34539	0.0918386	0.0253355	0.483655	Anti-silencing protein; causes derepression of silent loci when overexpressed	NA	chromatin organization	NA	NA	DNA	other	0	355
YPL008W	CHL1	-0.307016	-0.574657	-0.346967	-0.529627	-0.499685	0.859295	0.0525562	0.483934	0.260983	0.520686	Probable DNA helicase; involved in sister-chromatid cohesion and genome integrity and interstrand cross-link repair; interacts with ECO1 and CTF18; mutants are defective in silencing, rDNA recombination, aging and the heat shock response; FANCJ-like helicase family member; mutations in the human homolog, DDX11/ChLR1, cause Warsaw breakage syndrome	NA	DNA repair_cellular response to DNA damage stimulus_chromosome segregation_mitotic cell cycle_organelle fission	NA	NA	DNA	other	0	356
YER147C	SCC4	-0.826223	-0.389536	-0.286384	-0.280966	-0.247078	1.40334	0.386438	0.160399	0.0505387	0.531424	Subunit of cohesin loading factor (Scc2p-Scc4p); complex is required for the loading of cohesin complexes onto chromosomes; involved in establishing sister chromatid cohesion during double-strand break repair via phosphorylated histone H2AX	cohesin loading factor complex	DNA repair_cellular response to DNA damage stimulus_chromosome segregation_mitotic cell cycle_organelle fission	NA	NA	DNA	Cohesin	0	357
YDR180W	SCC2	-1.14746	-1.10876	-0.622508	-0.634214	-0.714791	NA	1.41174	0.359295	0.300457	0.556803	Subunit of cohesin loading factor (Scc2p-Scc4p); a complex required for loading of cohesin complexes onto chromosomes; involved in establishing sister chromatid cohesion during DSB repair via histone H2AX; promotes gene expression program that supports translational fidelity; evolutionarily-conserved adherin; relocalizes to cytosol in response to hypoxia; human disorder Cornelia de Lange syndrome…	cohesin loading factor complex	DNA recombination_DNA repair_cellular response to DNA damage stimulus_chromosome segregation_mitotic cell cycle_organelle fission	NA	NA	DNA	Cohesin	0	358
YDR014W	RAD61	-0.664316	-0.475323	-0.397916	-0.00210179	0.110157	1.07572	0.421427	0.499844	0.0864158	0.257288	Subunit of a complex that inhibits sister chromatid cohesion; also negatively regulates chromosome condensation; inhibited by Eco1p-acetylated cohesin subunits Smc3p and Mcd1p; binds Smc3p ATPase head of cohesin; related to the human Wapl protein that controls the association of cohesin with chromatin	NA	chromosome segregation_mitotic cell cycle_organelle fission_regulation of cell cycle_regulation of organelle organization	NA	NA	DNA	other	0	359
YLR272C	YCS4	0.450796	0.161937	-0.115949	0.0343287	0.0752349	0.67267	0.182352	0.466771	0.174471	0.185939	Subunit of the condensin complex; required for establishment and maintenance of chromosome condensation, chromosome segregation, chromatin binding of condensin, tRNA gene clustering at the nucleolus, and silencing at the mating type locus; required for replication slow zone (RSZ) breakage following Mec1p inactivation	nuclear condensin complex	chromatin organization_chromosome segregation_meiotic cell cycle_mitotic cell cycle_organelle fission_regulation of cell cycle_regulation of organelle organization	NA	NA	DNA	other	0	360
YDR325W	YCG1	-0.581024	-0.579805	-0.526897	-0.417012	-0.815869	1.46792	0.274801	0.38392	0.598384	0.694468	Subunit of the condensin complex; required for establishment and maintenance of chromosome condensation, chromosome segregation and chromatin binding of the condensin complex; required for clustering of tRNA genes at the nucleolus; required for replication slow zone (RSZ) breakage following Mec1p inactivation	nuclear condensin complex	chromosome segregation_meiotic cell cycle_mitotic cell cycle_organelle fission_regulation of cell cycle_regulation of organelle organization	NA	NA	DNA	other	0	361
YLR086W	SMC4	0.0401027	0.118852	0.0351334	-0.23661	-0.0454073	0.695929	0.189694	0.462159	0.278194	0.208779	Subunit of the condensin complex; condensin reorganizes chromosomes during both mitosis and meiosis; forms a subcomplex with Smc2p that has ATP-hydrolyzing and DNA-binding activity, but other condensin subunits are required for chromatin binding; required for tRNA gene clustering at the nucleolus; potential Cdc28p substrate	nuclear condensin complex	DNA replication_chromosome segregation_meiotic cell cycle_mitotic cell cycle_organelle fission	NA	NA	DNA	other	0	362
YFR031C	SMC2	-1.2922	-0.0620423	-0.0317495	0.0781406	-0.0418339	NA	0.165977	0.0746413	0.205544	0.375814	Subunit of the condensin complex; condensin reorganizes chromosomes during both mitosis and meiosis; essential SMC chromosomal ATPase family member that forms a subcomplex with Smc2p that has ATP-hydrolyzing and DNA-binding activity, but other condensin subunits are required for chromatin binding; required for clustering of tRNA genes at the nucleolus	nuclear condensin complex	chromosome segregation_meiotic cell cycle_mitotic cell cycle_organelle fission_regulation of cell cycle_regulation of organelle organization	NA	NA	DNA	other	0	363
YBL097W	BRN1	0.165424	-0.0164753	-0.198707	-0.0961384	-0.391664	0.165676	0.309462	0.415659	0.264987	0.0451204	Subunit of the condensin complex; required for chromosome condensation and for clustering of tRNA genes at the nucleolus; may influence multiple aspects of chromosome transmission	nuclear condensin complex	DNA replication_chromosome segregation_mitotic cell cycle_organelle fission	NA	NA	DNA	other	0	364
YJL074C	SMC3	-0.652187	-0.460639	-0.37751	-0.416493	-0.672163	1.1221	0.175752	0.396578	0.22207	0.446327	Subunit of the multiprotein cohesin complex; required for sister chromatid cohesion in mitotic cells; also required, with Rec8p, for cohesion and recombination during meiosis; phylogenetically conserved SMC chromosomal ATPase family member	nuclear cohesin complex	DNA recombination_DNA repair_cellular response to DNA damage stimulus_chromosome segregation_meiotic cell cycle_mitotic cell cycle_organelle fission_sporulation	NA	NA	DNA	Cohesin	7	365
YFL008W	SMC1	-0.155267	-0.492747	-0.184701	-0.00944665	0.34449	0.804153	0.371625	0.781143	0.551594	0.610151	Subunit of the multiprotein cohesin complex; essential protein involved in chromosome segregation and in double-strand DNA break repair; SMC chromosomal ATPase family member, binds DNA with a preference for DNA with secondary structure	nuclear cohesin complex	DNA repair_cellular response to DNA damage stimulus_chromosome segregation_mitotic cell cycle_organelle fission	NA	NA	DNA	Cohesin	7	366
YDL003W	MCD1	-0.372279	-0.307732	-0.151068	-0.0452244	0.55139	NA	NA	NA	NA	NA	Essential alpha-kleisin subunit of the cohesin complex; required for sister chromatid cohesion in mitosis and meiosis; apoptosis induces cleavage and translocation of a C-terminal fragment to mitochondria; expression peaks in S phase	nuclear cohesin complex	DNA recombination_DNA repair_DNA replication_cellular response to DNA damage stimulus_chromosome segregation_mitotic cell cycle_organelle fission	NA	NA	DNA	Cohesin	7	367
YIL026C	IRR1	-0.438813	-0.184428	0.152543	0.202032	0.14794	0.256831	0.264462	0.212094	0.245081	0.391734	Subunit of the cohesin complex; which is required for sister chromatid cohesion during mitosis and meiosis and interacts with centromeres and chromosome arms; relocalizes to the cytosol in response to hypoxia; essential for viability	nuclear cohesin complex	chromosome segregation_mitotic cell cycle_organelle fission	NA	NA	DNA	Cohesin	7	368
YPR135W	CTF4	0.231491	-0.239251	-0.0619631	-0.358499	-0.948269	0.40716	0.300179	0.15311	0.155536	0.528856	Chromatin-associated protein; required for sister chromatid cohesion; interacts with DNA polymerase alpha (Pol1p) and may link DNA synthesis to sister chromatid cohesion	NA	DNA recombination_DNA repair_DNA replication_cellular response to DNA damage stimulus_chromosome segregation_mitotic cell cycle_organelle fission	NA	NA	DNA	other	7	369
YMR076C	PDS5	-0.0203282	-0.110535	0.113227	-0.113402	-0.354127	0.587764	0.271783	0.120817	0.341661	0.5556	Cohesion maintenance factor; involved in sister chromatid condensation and cohesion; colocalizes with cohesin on chromosomes; performs its cohesin maintenance function in pre-anaphase cells by protecting the integrity of the cohesion complex; also required during meiosis; relocalizes to the cytosol in response to hypoxia	NA	DNA repair_cellular response to DNA damage stimulus_chromosome segregation_meiotic cell cycle_mitotic cell cycle_organelle fission	NA	NA	DNA	other	7	370
YPR120C	CLB5	-0.403679	-0.336818	-0.343221	-0.267985	-0.272481	1.17963	0.442043	0.156264	0.228018	0.443053	B-type cyclin involved in DNA replication during S phase; activates Cdc28p to promote initiation of DNA synthesis; functions in formation of mitotic spindles along with Clb3p and Clb4p; most abundant during late G1 phase; CLB5 has a paralog, CLB6, that arose from the whole genome duplication	Cdc28p/Clb5p complex	DNA replication_cytoskeleton organization_meiotic cell cycle_mitotic cell cycle_organelle assembly_organelle fission_protein phosphorylation_regulation of DNA metabolic process_regulation of cell cycle_regulation of organelle organization_regulation of protein modification process	NA	NA	DNA	other	0	371
YCL016C	DCC1	-1.0642	-0.22633	-0.245606	-0.56513	-0.829867	1.6459	0.201492	0.331107	0.356914	0.71726	Subunit of a complex with Ctf8p and Ctf18p; shares some components with Replication Factor C; required for sister chromatid cohesion and telomere length maintenance	DNA replication factor C complex (Ctf18p/Ctf8p/dcc1p)	cellular response to DNA damage stimulus_chromosome segregation_mitotic cell cycle_organelle fission	NA	NA	DNA	other	0	372
YMR078C	CTF18	-0.131821	-0.242749	-0.265389	-0.0560341	-0.522341	0.511783	0.188668	0.221191	0.178316	0.835525	Subunit of a complex with Ctf8p; shares some subunits with Replication Factor C and is required for sister chromatid cohesion; may have overlapping functions with Rad24p in the DNA damage replication checkpoint	DNA replication factor C complex (Ctf18p/Ctf8p/dcc1p)	DNA recombination_DNA repair_DNA replication_cellular response to DNA damage stimulus_chromosome segregation_mitotic cell cycle_organelle fission	NA	NA	DNA	other	0	373
YDR052C	DBF4	-0.902847	-0.314967	0.0555697	-0.410522	-0.193902	1.49959	0.392508	0.570087	0.430904	0.384374	Regulatory subunit of Cdc7p-Dbf4p kinase complex; required for Cdc7p kinase activity and initiation of DNA replication; phosphorylates the Mcm2-7 family of proteins; cell cycle regulated; relative distribution to the nucleus increases upon DNA replication stress; co-expression of human CDC7 and DBF4 complements single cdc7 or dbf4 null mutations or the cdc7 dbf4 double null mutation	Cdc7p/Dbf4p complex	DNA replication_meiotic cell cycle_mitotic cell cycle_organelle fission_protein phosphorylation_regulation of cell cycle_regulation of organelle organization_regulation of protein modification process	NA	NA	DNA	other	0	374
YDL017W	CDC7	-1.29656	-0.479812	-0.100726	-0.404476	-0.03921	NA	0.341841	0.36363	0.349345	0.4834	DDK (Dbf4-dependent kinase) catalytic subunit; required for origin firing and replication fork progression in mitotic S phase through phosphorylation of Mcm2-7p complexes and Cdc45p; kinase activity correlates with cyclical DBF4 expression; required for pre-meiotic DNA replication, meiotic DSB formation, recruitment of monopolin complex to kinetochores during meiosis I, regulation of meiosis-spec…	Cdc7p/Dbf4p complex	DNA recombination_DNA repair_DNA replication_cellular response to DNA damage stimulus_chromatin organization_meiotic cell cycle_mitotic cell cycle_organelle fission_peptidyl-amino acid modification_protein phosphorylation_regulation of cell cycle_regulation of organelle organization	NA	NA	DNA	other	0	375
YGL090W	LIF1	-0.726961	-0.41973	-0.424545	-0.380068	-0.257446	0.268786	0.292546	0.377731	0.639147	0.444229	Component of the DNA ligase IV complex; this complex mediates nonhomologous end joining in DNA double-strand break repair; physically interacts with Dnl4p and Nej1p; homologous to mammalian XRCC4 protein	DNA ligase IV	DNA repair_cellular response to DNA damage stimulus	NA	NA	DNA	other	0	376
YDR419W	RAD30	-0.116203	-0.768298	-1.23322	-0.661845	-0.666036	0.464025	0.584693	0.332541	0.938621	0.588474	DNA polymerase eta; involved in translesion synthesis during post-replication repair; catalyzes the synthesis of DNA opposite cyclobutane pyrimidine dimers and other lesions; involved in formation of post-replicative damage-induced genome-wide cohesion; may also have a role in protection against mitochondrial mutagenesis; mutations in human pol eta are responsible for XPV	NA	DNA repair_cellular response to DNA damage stimulus_chromosome segregation_mitotic cell cycle_organelle fission	NA	NA	DNA	other	0	377
YIR008C	PRI1	-0.650562	-0.0417103	-0.145149	-0.0821047	0.485278	NA	0.282856	0.230692	0.0695227	0.185649	Subunit of DNA primase; DNA primase is required for DNA synthesis and double-strand break repair	alpha DNA polymerase:primase complex	DNA replication	NA	NA	DNA	other	0	378
YJR043C	POL32	-0.519875	-0.0882447	-0.0223604	-0.0884535	-0.2143	0.482895	0.0258605	0.136468	0.104243	0.11057	Third subunit of DNA polymerase delta; involved in chromosomal DNA replication; required for error-prone DNA synthesis in the presence of DNA damage and processivity; forms a complex with Rev3p, Rev7p and Pol31p; interacts with Hys2p, PCNA (Pol30p), and Pol1p	DNA polymerase delta complex	DNA recombination_DNA repair_DNA replication_RNA catabolic process_cellular response to DNA damage stimulus	NA	NA	RNA	other	0	379
YJR006W	POL31	-0.475998	-0.537341	-0.324212	-0.22115	0.331098	NA	NA	NA	NA	NA	Subunit of DNA polymerase delta (polymerase III); essential for cell viability; involved in DNA replication and DNA repair; forms a complex with Rev3p, Rev7p and Pol32p; relocalizes to the cytosol in response to hypoxia	DNA polymerase delta complex	DNA repair_DNA replication_RNA catabolic process_cellular response to DNA damage stimulus	NA	NA	RNA	other	0	380
YNL262W	POL2	-0.727224	0.052949	-0.284479	0.0725041	-0.0045074	1.40878	0.153319	0.327072	0.478977	0.473698	Catalytic subunit of DNA polymerase (II) epsilon; a chromosomal DNA replication polymerase that exhibits processivity and proofreading exonuclease activity; participates in leading-strand synthesis during DNA replication; also involved in DNA synthesis during DNA repair; interacts extensively with Mrc1p	DNA polymerase epsilon complex	DNA recombination_DNA repair_DNA replication_cellular response to DNA damage stimulus_chromatin organization_chromosome segregation_mitotic cell cycle_organelle fission_regulation of cell cycle	NA	NA	DNA	other	0	381
YBL035C	POL12	-0.38845	-0.220197	-0.00513321	-0.394746	-0.431143	0.851194	0.363456	0.357441	0.470574	0.745361	B subunit of DNA polymerase alpha-primase complex; required for initiation of DNA replication during mitotic and premeiotic DNA synthesis; also functions in telomere capping and length regulation	alpha DNA polymerase:primase complex	DNA replication_telomere organization	NA	NA	DNA	other	0	382
YNL102W	POL1	-0.157576	-0.239032	-0.0171657	-0.286982	-0.575155	1.26828	0.299154	0.120251	0.269346	0.452508	Catalytic subunit of the DNA polymerase I alpha-primase complex; required for the initiation of DNA replication during mitotic DNA synthesis and premeiotic DNA synthesis	alpha DNA polymerase:primase complex	DNA repair_DNA replication_cellular response to DNA damage stimulus_meiotic cell cycle	NA	NA	DNA	other	0	383
YKL017C	HCS1	-0.697124	-0.336845	-0.395922	-0.422952	0.0806471	0.508074	0.460706	0.256201	0.268245	0.362235	Hexameric DNA polymerase alpha-associated DNA helicase A; involved in lagging strand DNA synthesis; contains single-stranded DNA stimulated ATPase and dATPase activities; replication protein A stimulates helicase and ATPase activities	NA	DNA replication	NA	NA	DNA	other	0	384
YDR121W	DPB4	0.172685	-0.176858	0.160595	-0.127693	-0.180167	0.423133	0.168102	0.195023	0.300266	0.0867846	Subunit of DNA pol epsilon and of ISW2 chromatin accessibility complex; involved in both chromosomal DNA replication and inheritance of telomeric silencing; stabilizes the interaction of Pol epsilon with primer-template DNA, positively affecting the processivity of the polymerase and exonuclease activities of Pol epsilon; interacts with extranucleosomal DNA and acts as anchor point for ISW2 compl…	chromatin accessibility complex_DNA polymerase epsilon complex	DNA repair_DNA replication_cellular response to DNA damage stimulus_chromatin organization	NA	NA	DNA	other	0	385
YBR278W	DPB3	-0.58962	0.00666383	-0.413281	0.0728257	-0.0634481	0.593113	0.165221	0.316446	0.218464	0.420666	Third-largest subunit of DNA polymerase II (DNA polymerase epsilon); required to maintain fidelity of chromosomal replication and also for inheritance of telomeric silencing; stabilizes the interaction of Pol epsilon with primer-template DNA, positively affecting the processivity of the polymerase and exonuclease activities of Pol epsilon; mRNA abundance peaks at the G1/S boundary of the cell cyc…	DNA polymerase epsilon complex	DNA repair_DNA replication_cellular response to DNA damage stimulus_chromatin organization	NA	NA	DNA	other	0	386
YPR175W	DPB2	0.0982155	-0.0619268	-0.156872	-0.425692	-0.0362728	0.751374	0.359956	0.707963	0.767182	0.797516	Second largest subunit of DNA polymerase II (DNA polymerase epsilon); required for maintenance of fidelity of chromosomal replication; essential motif in C-terminus is required for formation of the four-subunit Pol epsilon; expression peaks at the G1/S phase boundary; Cdc28p substrate	DNA polymerase epsilon complex	DNA repair_DNA replication_cellular response to DNA damage stimulus_chromatin organization	NA	NA	DNA	other	0	387
YKL108W	SLD2	-0.561812	-0.238228	-0.399669	-0.27501	0.00484791	0.740367	0.445347	0.548994	0.51221	0.264627	Single-stranded DNA origin-binding and annealing protein; required for initiation of DNA replication; phosphorylated in S phase by cyclin-dependent kinases (Cdks), promoting origin binding, DNA replication and Dpb11p complex formation; component of the preloading complex; binds the Mcm2-7p complex to prevent inappropriate Mcm2-7p interaction with the GINS complex in G1; required for S phase check…	Dpb11p/Sld2p complex	DNA recombination_DNA repair_DNA replication_cellular response to DNA damage stimulus_mitotic cell cycle_protein complex biogenesis_regulation of cell cycle	NA	NA	DNA	other	0	388
YJL090C	DPB11	-0.268869	-0.217114	-0.145268	-0.305894	-0.526156	0.96179	0.17921	0.367228	0.0797416	0.58301	DNA replication initiation protein; loads DNA pol epsilon onto pre-replication complexes at origins; checkpoint sensor recruited to stalled replication forks by the checkpoint clamp complex where it activates Mec1p; along with Rfa1p, binds to ultrafine anaphase bridges in mitotic cells and prevents accumulation of chromatin bridges by stimulating the Mec1p kinase and suppressing homologous recomb…	Dpb11p/Sld2p complex	DNA recombination_DNA repair_DNA replication_cellular response to DNA damage stimulus_mitotic cell cycle_protein phosphorylation_regulation of cell cycle_regulation of protein modification process	NA	NA	DNA	other	0	389
YOR144C	ELG1	-1.54379	-0.413386	-0.071283	-0.362629	-0.558383	0.326774	0.143256	0.202114	0.061219	0.353347	Subunit of an alternative replication factor C complex; important for DNA replication and genome integrity; suppresses spontaneous DNA damage; involved in homologous recombination-mediated repair and telomere homeostasis; required for PCNA (Pol30p) unloading during DNA replication	DNA replication factor C complex (Elg1p)	DNA recombination_DNA repair_DNA replication_cellular response to DNA damage stimulus_chromosome segregation_mitotic cell cycle_organelle fission_regulation of DNA metabolic process_telomere organization_transposition	NA	NA	DNA	other	0	390
YOL146W	PSF3	0.228276	-0.447591	-0.346331	-0.358001	0.0370807	0.350237	0.466577	0.504915	0.580433	0.695942	Subunit of the GINS complex (Sld5p, Psf1p, Psf2p, Psf3p); complex is localized to DNA replication origins and implicated in assembly of the DNA replication machinery	GINS complex	DNA recombination_DNA repair_DNA replication_cellular response to DNA damage stimulus	NA	NA	DNA	other	0	391
YDR013W	PSF1	0.538702	-0.747403	-0.387367	-0.926318	-0.766707	NA	0.854096	0.536157	0.358084	1.37589	Subunit of the GINS complex (Sld5p, Psf1p, Psf2p, Psf3p); complex is localized to DNA replication origins and implicated in assembly of the DNA replication machinery	GINS complex	DNA recombination_DNA repair_DNA replication_cellular response to DNA damage stimulus	NA	NA	DNA	other	0	392
YJL072C	PSF2	0.993779	0.0273729	0.368907	-0.19156	1.14522	NA	0.690594	0.776796	0.861763	0.963189	Subunit of the GINS complex (Sld5p, Psf1p, Psf2p, Psf3p); complex is localized to DNA replication origins and implicated in assembly of the DNA replication machinery	GINS complex	DNA recombination_DNA repair_DNA replication_cellular response to DNA damage stimulus	NA	NA	DNA	other	7	393
YLR274W	MCM5	0.831882	0.200317	0.244112	0.531777	0.0867612	0.825468	0.291722	0.0796295	0.187925	0.0580348	Component of the Mcm2-7 hexameric helicase complex; MCM complex is important for priming origins of DNA replication in G1 and becomes an active ATP-dependent helicase that promotes DNA melting and elongation when activated by Cdc7p-Dbf4p in S-phase	Mcm2-7 complex	DNA recombination_DNA repair_DNA replication_cellular response to DNA damage stimulus_chromatin organization_regulation of DNA metabolic process	NA	NA	DNA	MCM	7	394
YPR019W	MCM4	0.0387781	0.643751	0.603424	0.573498	-0.345987	0.374954	0.0315066	0.0954549	0.192436	0.540076	Essential helicase component of heterohexameric MCM2-7 complexes; MCM2-7 complexes bind pre-replication complexes on DNA and melt DNA prior to replication; forms an Mcm4p-6p-7p subcomplex; shows nuclear accumulation in G1; homolog of S. pombe Cdc21p	Mcm2-7 complex	DNA recombination_DNA repair_DNA replication_cellular response to DNA damage stimulus	NA	NA	DNA	MCM	7	395
YGL201C	MCM6	-0.450821	0.552748	0.546222	0.549664	-0.574555	NA	0.327211	0.255911	0.0759659	0.265768	Protein involved in DNA replication; component of the Mcm2-7 hexameric helicase complex that binds chromatin as a part of the pre-replicative complex; forms a subcomplex with Mcm4p and Mcm7p	Mcm2-7 complex	DNA recombination_DNA repair_DNA replication_cellular response to DNA damage stimulus	NA	NA	DNA	MCM	7	396
YBL023C	MCM2	-0.353166	0.396418	0.168649	0.232906	0.28654	0.794446	0.145207	0.227042	0.253466	0.230171	Protein involved in DNA replication; component of the Mcm2-7 hexameric helicase complex that binds chromatin as a part of the pre-replicative complex; relative distribution to the nucleus increases upon DNA replication stress	Mcm2-7 complex	DNA recombination_DNA repair_DNA replication_cellular response to DNA damage stimulus_regulation of organelle organization	NA	NA	DNA	MCM	7	397
YIL150C	MCM10	-0.583598	-0.389696	-0.992266	-0.611253	-0.251557	0.600981	0.201775	0.810169	0.797447	0.581496	Essential chromatin-associated protein; involved in the initiation of DNA replication; required for the association of the MCM2-7 complex with replication origins; required to stabilize the catalytic subunit of DNA polymerase-alpha	NA	DNA recombination_DNA repair_DNA replication_cellular response to DNA damage stimulus_chromatin organization	NA	NA	DNA	other	0	398
YDR386W	MUS81	-0.303369	-0.30244	-0.0796615	-0.0716531	0.326698	0.450058	0.132634	0.265864	0.118809	0.184424	Subunit of structure-specific Mms4p-Mus81p endonuclease; cleaves branched DNA; involved in DNA repair, replication fork stability, and joint molecule formation/resolution during meiotic recombination; promotes template switching during break-induced replication (BIR), causing non-reciprocal translocations (NRTs); helix-hairpin-helix protein; phosphorylation of non-catalytic subunit Mms4p by Cdc28…	Holliday junction resolvase complex	DNA recombination_DNA repair_cellular response to DNA damage stimulus_chromosome segregation_meiotic cell cycle_organelle fission	NA	NA	DNA	other	0	399
YML065W	ORC1	-0.141937	0.374123	0.556643	0.636954	1.20819	0.358328	0.069246	0.337369	0.1428	0.220852	Largest subunit of the origin recognition complex; involved in directing DNA replication by binding to replication origins; also involved in transcriptional silencing; exhibits ATPase activity; ORC1 has a paralog, SIR3, that arose from the whole genome duplication	Origin recognition complex	DNA replication_chromatin organization	NA	yetfasco	DNA	ORC	7	400
YBR060C	ORC2	-0.468107	0.286336	0.262126	0.234662	-0.0191487	0.392135	0.147847	0.344368	0.090285	0.361375	Subunit of the origin recognition complex (ORC); ORC directs DNA replication by binding to replication origins and is also involved in transcriptional silencing; interacts with Spp1p and with trimethylated histone H3; phosphorylated by Cdc28p	Origin recognition complex	DNA replication_chromatin organization_histone modification_peptidyl-amino acid modification_protein alkylation	NA	NA	DNA	ORC	7	401
YNL261W	ORC5	0.151056	-0.201317	0.303669	0.217078	-0.192007	0.310343	0.594896	0.39303	0.0997994	0.455883	Subunit of the origin recognition complex (ORC); ORC directs DNA replication by binding to replication origins and is also involved in transcriptional silencing	Origin recognition complex	DNA replication_chromatin organization	NA	NA	DNA	ORC	7	402
YHR118C	ORC6	0.551984	0.0473924	0.271933	-0.0590416	0.000633768	NA	0.0626357	0.173693	0.449687	0.392769	Subunit of the origin recognition complex (ORC); ORC directs DNA replication by binding to replication origins and is also involved in transcriptional silencing; phosphorylated by Cdc28p; mutation in the human Orc6p is linked to Meier-Gorlin syndrome	Origin recognition complex	DNA replication_chromatin organization	NA	NA	DNA	ORC	7	403
YAR007C	RFA1	0.483102	0.703248	0.610649	0.568745	0.204012	0.473836	0.439953	0.347716	0.282278	0.250731	Subunit of heterotrimeric Replication Protein A (RPA); RPA is a highly conserved single-stranded DNA binding protein involved in DNA replication, repair, and recombination; RPA protects against inappropriate telomere recombination, and upon telomere uncapping, prevents cell proliferation by a checkpoint-independent pathway; role in DNA catenation/decatenation pathway of chromosome disentangling; …	DNA replication factor A complex	DNA recombination_DNA repair_DNA replication_cellular response to DNA damage stimulus_meiotic cell cycle_organelle fission_protein modification by small protein conjugation or removal_telomere organization	NA	NA	DNA	other	7	404
YNL312W	RFA2	-0.0517709	0.498792	0.445456	0.65757	0.140026	1.52036	0.700945	0.397866	0.241384	0.654185	Subunit of heterotrimeric Replication Protein A (RPA); RPA is a highly conserved single-stranded DNA binding protein involved in DNA replication, repair, and recombination; RPA protects against inappropriate telomere recombination, and upon telomere uncapping, prevents cell proliferation by a checkpoint-independent pathway; in concert with Sgs1p-Top2p-Rmi1p, stimulates DNA catenation/decatenation…	DNA replication factor A complex	DNA recombination_DNA repair_DNA replication_cellular response to DNA damage stimulus_meiotic cell cycle_organelle fission_protein modification by small protein conjugation or removal_telomere organization	NA	NA	DNA	other	7	405
YJL173C	RFA3	-0.890341	0.229145	0.234828	0.25285	0.441142	0.739399	0.0902871	0.201267	0.0690149	0.198862	Subunit of heterotrimeric Replication Protein A (RPA); RPA is a highly conserved single-stranded DNA binding protein complex involved in DNA replication, repair, recombination; RPA protects against inappropriate telomere recombination, and upon telomere uncapping, prevents cell proliferation by a checkpoint-independent pathway; with Sgs1p-Top2p-Rmi1p, stimulates DNA catenation/decatenation activi…	DNA replication factor A complex	DNA recombination_DNA repair_DNA replication_cellular response to DNA damage stimulus_meiotic cell cycle_organelle fission_protein modification by small protein conjugation or removal_telomere organization	NA	NA	DNA	other	7	406
YOL094C	RFC4	-0.271308	-0.0983075	-0.233323	-0.272445	0.0944527	0.740513	0.297504	0.268732	0.610807	0.741871	Subunit of heteropentameric Replication factor C (RF-C); which is a DNA binding protein and ATPase that acts as a clamp loader of the proliferating cell nuclear antigen (PCNA) processivity factor for DNA polymerases delta and epsilon; relocalizes to the cytosol in response to hypoxia	DNA replication factor C complex (Rad24p)_DNA replication factor C complex (Elg1p)_DNA replication factor C complex (Rcf1p)_DNA replication factor C complex (Ctf18p/Ctf8p/dcc1p)	DNA repair_DNA replication_cellular response to DNA damage stimulus_chromosome segregation	NA	NA	DNA	other	0	407
YER173W	RAD24	0.299278	-0.211982	-0.301908	-0.334771	-0.0546211	0.368285	0.356261	0.132482	0.215618	0.214305	Checkpoint protein; involved in the activation of the DNA damage and meiotic pachytene checkpoints; subunit of a clamp loader that loads Rad17p-Mec3p-Ddc1p onto DNA; homolog of human and S. pombe Rad17 protein	DNA replication factor C complex (Rad24p)	DNA recombination_DNA repair_cellular response to DNA damage stimulus_meiotic cell cycle_organelle fission_regulation of cell cycle	NA	NA	DNA	other	0	408
YBR087W	RFC5	-0.724424	-0.262097	0.196684	-0.131775	-0.0818275	NA	0.207939	0.169233	0.404677	0.888647	Subunit of heteropentameric Replication factor C (RF-C); RF-C is a DNA binding protein and ATPase that acts as a clamp loader of the proliferating cell nuclear antigen (PCNA) processivity factor for DNA polymerases delta and epsilon	DNA replication factor C complex (Rad24p)_DNA replication factor C complex (Elg1p)_DNA replication factor C complex (Rcf1p)_DNA replication factor C complex (Ctf18p/Ctf8p/dcc1p)	DNA replication_chromosome segregation	NA	NA	DNA	other	0	409
YNL290W	RFC3	0.249919	0.34867	-0.0140758	0.233398	0.0704896	1.05716	0.114954	0.519736	0.277615	0.0467031	Subunit of heteropentameric Replication factor C (RF-C); which is a DNA binding protein and ATPase that acts as a clamp loader of the proliferating cell nuclear antigen (PCNA) processivity factor for DNA polymerases delta and epsilon; relocalizes to the cytosol in response to hypoxia	DNA replication factor C complex (Rad24p)_DNA replication factor C complex (Elg1p)_DNA replication factor C complex (Rcf1p)_DNA replication factor C complex (Ctf18p/Ctf8p/dcc1p)	DNA repair_DNA replication_cellular response to DNA damage stimulus_chromosome segregation	NA	NA	DNA	other	7	410
YJR068W	RFC2	0.217217	0.272013	0.0647792	0.0501531	-0.505603	0.483245	0.127112	0.132586	0.165425	0.509662	Subunit of heteropentameric Replication factor C (RF-C); RF-C is a DNA binding protein and ATPase that acts as a clamp loader of the proliferating cell nuclear antigen (PCNA) processivity factor for DNA polymerases delta and epsilon	DNA replication factor C complex (Rad24p)_DNA replication factor C complex (Elg1p)_DNA replication factor C complex (Rcf1p)_DNA replication factor C complex (Ctf18p/Ctf8p/dcc1p)	DNA repair_DNA replication_cellular response to DNA damage stimulus_chromosome segregation_regulation of cell cycle	NA	NA	DNA	other	7	411
YOR217W	RFC1	0.269564	-0.507781	-0.135666	-0.328013	-0.498063	0.255707	0.557485	0.127786	0.136724	0.359911	Subunit of heteropentameric Replication factor C (RF-C); RF-C is a DNA binding protein and ATPase that acts as a clamp loader of the proliferating cell nuclear antigen (PCNA) processivity factor for DNA polymerases delta and epsilon	DNA replication factor C complex (Rcf1p)	DNA repair_DNA replication_cellular response to DNA damage stimulus_mitotic cell cycle	NA	NA	DNA	other	7	412
YNL273W	TOF1	-0.488733	-0.550565	-0.407501	-0.190367	-1.16042	0.420366	0.364208	0.312781	0.233817	0.429526	Subunit of a replication-pausing checkpoint complex; Tof1p-Mrc1p-Csm3p acts at the stalled replication fork to promote sister chromatid cohesion after DNA damage, facilitating gap repair of damaged DNA; interacts with the MCM helicase; relocalizes to the cytosol in response to hypoxia	Tof1p/Mrc1p/Csm3p complex	DNA repair_DNA replication_cellular response to DNA damage stimulus_chromosome segregation_mitotic cell cycle_organelle fission_regulation of DNA metabolic process_regulation of cell cycle	NA	NA	DNA	other	0	413
YCL061C	MRC1	-0.672082	-0.499116	-0.790365	-0.364262	-0.380781	0.1155	0.75559	0.504975	0.473346	1.05083	S-phase checkpoint protein required for DNA replication; couples DNA helicase and polymerase; interacts with and stabilizes Pol2p at stalled replication forks during stress, where it forms a pausing complex with Tof1p and is phosphorylated by Mec1p; defines a novel S-phase checkpoint with Hog1p that coordinates DNA replication and transcription upon osmostress; protects uncapped telomeres; Dia2p-…	Tof1p/Mrc1p/Csm3p complex	DNA repair_DNA replication_cellular response to DNA damage stimulus_chromatin organization_chromosome segregation_mitotic cell cycle_organelle fission_regulation of DNA metabolic process_regulation of cell cycle_telomere organization	NA	NA	DNA	other	0	414
YMR048W	CSM3	-0.392996	-0.290106	-0.234121	-0.393881	-0.0895401	1.60805	0.223939	0.199408	0.523662	0.218869	Replication fork associated factor; required for stable replication fork pausing; component of the DNA replication checkpoint pathway; required for accurate chromosome segregation during meiosis; forms nuclear foci upon DNA replication stress	Tof1p/Mrc1p/Csm3p complex	DNA repair_DNA replication_cellular response to DNA damage stimulus_chromosome segregation_meiotic cell cycle_mitotic cell cycle_organelle fission_regulation of DNA metabolic process_regulation of cell cycle	NA	NA	DNA	other	0	415
YJR046W	TAH11	0.0900783	-0.140121	-0.250992	-0.0257029	-0.172043	0.374912	0.302728	0.131882	0.141018	0.446283	DNA replication licensing factor; required for pre-replication complex assembly	NA	DNA recombination_DNA repair_DNA replication_cellular response to DNA damage stimulus_regulation of DNA metabolic process	NA	NA	DNA	other	0	416
YOR060C	SLD7	-0.0952203	-0.631844	-0.412694	-0.649808	-0.160095	1.02867	0.368154	0.202725	0.423614	0.162203	Protein with a role in chromosomal DNA replication; interacts with Sld3p and reduces its affinity for Cdc45p; deletion mutant has aberrant mitochondria	NA	DNA replication_regulation of DNA metabolic process	NA	NA	DNA	other	0	417
YGL113W	SLD3	-0.561511	-0.740301	-0.525283	-0.182058	-0.198838	NA	0.435243	0.134526	0.0674498	0.193299	Protein involved in the initiation of DNA replication; required for proper assembly of replication proteins at the origins of replication; interacts with Cdc45p; localizes to nuclear foci that become diffuse upon DNA replication stress	NA	DNA recombination_DNA repair_DNA replication_cellular response to DNA damage stimulus	NA	NA	DNA	other	0	418
YOR346W	REV1	NA	NA	NA	NA	NA	NA	NA	NA	NA	NA	Deoxycytidyl transferase; involved in repair of abasic sites and adducted guanines in damaged DNA by translesion synthesis (TLS); forms a complex with the subunits of DNA polymerase zeta, Rev3p and Rev7p; relocalizes from nucleus to cytoplasm upon DNA replication stress	Polzeta-Rev1p complex	DNA repair_cellular response to DNA damage stimulus	NA	NA	DNA	other	0	419
YKL113C	RAD27	0.162642	-0.66678	-0.352833	-0.377383	-0.623831	0.756255	0.818386	0.506891	0.576171	0.0524184	5' to 3' exonuclease, 5' flap endonuclease; required for Okazaki fragment processing and maturation, for long-patch base-excision repair and large loop repair (LLR), ribonucleotide excision repair; member of the S. pombe RAD2/FEN1 family; relocalizes to the cytosol in response to hypoxia	NA	DNA recombination_DNA repair_DNA replication_RNA catabolic process_cellular response to DNA damage stimulus	NA	NA	RNA	other	0	420
YNL218W	MGS1	-0.703945	-0.515045	-0.654299	-0.740287	0.0019271	0.841671	0.815217	0.767947	0.583972	0.853082	Protein with DNA-dependent ATPase and ssDNA annealing activities; involved in maintenance of genome; interacts functionally with DNA polymerase delta; homolog of human Werner helicase interacting protein (WHIP); forms nuclear foci upon DNA replication stress	NA	DNA repair_DNA replication_cellular response to DNA damage stimulus_regulation of DNA metabolic process	NA	NA	DNA	other	0	421
YHR164C	DNA2	-0.583238	-0.372273	-0.294874	-0.352796	-0.447124	0.292315	0.13276	0.270465	0.308386	0.0483055	Tripartite DNA replication factor; single-stranded DNA-dependent ATPase, ATP-dependent nuclease, helicase; tracking protein for flap cleavage during Okazaki fragment maturation; involved in DNA repair/processing of meiotic DNA double strand breaks; component of telomeric chromatin with cell-cycle dependent localization; required for telomerase-dependent telomere synthesis; forms nuclear foci upon…	NA	DNA repair_DNA replication_cellular response to DNA damage stimulus_meiotic cell cycle_telomere organization	NA	NA	DNA	other	0	422
YDL164C	CDC9	0.263418	-0.984749	-0.88858	-1.05374	-0.40788	0.679403	0.294825	0.421702	0.421775	0.193635	DNA ligase found in the nucleus and mitochondria; an essential enzyme that joins Okazaki fragments during DNA replication; also acts in ribonucleotide excision repair, base excision repair, and recombination; human homolog LIG1 can complement yeast cdc9 temperature-sensitive mutant at restrictive temperature	NA	DNA recombination_DNA repair_DNA replication_cellular response to DNA damage stimulus_mitotic cell cycle	NA	NA	DNA	other	0	423
YLR103C	CDC45	-0.366019	-0.396198	-0.19165	-0.377915	-0.235011	0.837547	0.641074	0.312588	0.32947	0.342768	DNA replication initiation factor; recruited to MCM pre-RC complexes at replication origins; promotes release of MCM from Mcm10p, recruits elongation machinery; binds tightly to ssDNA, which disrupts interaction with the MCM helicase and stalls it during replication stress; mutants in human homolog may cause velocardiofacial and DiGeorge syndromes	NA	DNA recombination_DNA repair_DNA replication_cellular response to DNA damage stimulus_chromatin organization	NA	NA	DNA	other	7	424
YOL006C	TOP1	0.438429	0.651926	0.837958	0.67693	-0.205715	0.162982	0.259569	0.255625	0.0284108	0.354315	Topoisomerase I; nuclear enzyme that relieves torsional strain in DNA by cleaving and re-sealing the phosphodiester backbone; relaxes both positively and negatively supercoiled DNA; functions in replication, transcription, and recombination; role in processing ribonucleoside monophosphates in genomic DNA into irreversible single-strand breaks; enzymatic activity and interaction with Nsr1p are neg…	NA	DNA recombination_DNA replication_DNA-templated transcription, elongation_chromatin organization_chromosome segregation_mitotic cell cycle_organelle fission_regulation of DNA metabolic process_transcription from RNA polymerase II promoter	NA	NA	DNA	other	7	425
YLR234W	TOP3	-0.845349	-0.588576	-0.153467	-0.641085	0.123962	NA	0.397681	0.503395	0.186377	0.558659	DNA Topoisomerase III; conserved protein that functions in a complex with Sgs1p and Rmi1p to relax single-stranded negatively-supercoiled DNA preferentially; DNA catenation/decatenation activity is stimulated by RPA and Sgs1p-Top3p-Rmi1p; involved in telomere stability and regulation of mitotic recombination	RecQ helicase-Topo III complex	DNA recombination_chromosome segregation_meiotic cell cycle_mitotic cell cycle_organelle fission_regulation of DNA metabolic process_telomere organization	NA	NA	DNA	other	0	426
YNL088W	TOP2	-0.190352	0.614627	0.6215	0.826914	0.296413	0.800772	0.0995026	0.203654	0.150763	0.38072	Topoisomerase II; relieves torsional strain in DNA by cleaving and re-sealing phosphodiester backbone of both positively and negatively supercoiled DNA; cleaves complementary strands; localizes to axial cores in meiosis; required for replication slow zone (RSZ) breakage following Mec1p inactivation; human homolog TOP2A implicated in cancers, and can complement yeast null mutant	NA	DNA recombination_DNA replication_chromatin organization_meiotic cell cycle_mitotic cell cycle_organelle fission_regulation of DNA metabolic process_regulation of cell cycle	NA	NA	DNA	other	7	427
YJR035W	RAD26	-0.276883	-0.549276	-0.255179	-0.298198	-0.417763	0.181485	0.187221	0.103336	0.1288	0.388895	Protein involved in transcription-coupled nucleotide excision repair; repairs UV-induced DNA lesions; recruitment to DNA lesions is dependent on an elongating RNA polymerase II; homolog of human CSB protein	Def1p/Rad26p complex	DNA repair_cellular response to DNA damage stimulus_chromatin organization	NA	NA	DNA	other	0	428
YKL054C	DEF1	-0.329556	-0.223293	-0.00106912	-0.0703193	0.644947	1.22822	0.376223	0.170121	0.0324952	0.558395	RNAPII degradation factor; forms a complex with Rad26p in chromatin, enables ubiquitination and proteolysis of RNAPII present in an elongation complex; mutant is deficient in Zip1p loading onto chromosomes during meiosis	Def1p/Rad26p complex	DNA repair_cellular response to DNA damage stimulus_protein modification by small protein conjugation or removal_proteolysis involved in cellular protein catabolic process_telomere organization	NA	NA	DNA	other	0	429
YMR106C	YKU80	-0.319944	-0.671307	-0.289873	-0.743884	-0.437729	0.247434	0.411419	0.295087	0.518542	0.797487	Subunit of the telomeric Ku complex (Yku70p-Yku80p); involved in telomere length maintenance, structure and telomere position effect; required for localization of telomerase ribonucleoprotein via interaction with the TLC1 guide RNA; relocates to sites of double-strand cleavage to promote nonhomologous end joining during DSB repair	Ku complex	DNA recombination_DNA repair_cellular response to DNA damage stimulus_chromatin organization_telomere organization	NA	NA	DNA	other	0	430
YMR284W	YKU70	-0.880186	-0.229262	-0.133212	-0.320354	-0.0214287	0.368702	0.180382	0.141805	0.116935	0.213825	Subunit of the telomeric Ku complex (Yku70p-Yku80p); involved in telomere length maintenance, structure and telomere position effect; required for localization of telomerase ribonucleoprotein to nucleus via interaction with the TLC1 guide RNA; relocates to sites of double-strand cleavage to promote nonhomologous end joining during DSB repair	Ku complex	DNA recombination_DNA repair_cellular response to DNA damage stimulus_chromatin organization_telomere organization	NA	NA	DNA	other	0	431
YNL082W	PMS1	-0.105815	-0.721758	-0.454161	-0.757157	-0.459639	0.118616	0.78098	0.080905	0.753952	0.297792	ATP-binding protein required for mismatch repair; required for both mitosis and meiosis; functions as a heterodimer with Mlh1p; binds double- and single-stranded DNA via its N-terminal domain, similar to E. coli MutL	Mlh1p/Pms1p complex	DNA repair_cellular response to DNA damage stimulus_meiotic cell cycle_organelle fission	NA	NA	DNA	other	0	432
YCR092C	MSH3	-0.441949	-0.391792	-0.374539	-0.242633	-0.145134	0.922869	0.387182	0.14956	0.335694	0.275911	Mismatch repair protein; forms dimers with Msh2p that mediate repair of insertion or deletion mutations and removal of nonhomologous DNA ends, contains a PCNA (Pol30p) binding motif required for genome stability	MSH2p/MSH3p complex	DNA recombination_DNA repair_DNA replication_cellular response to DNA damage stimulus_meiotic cell cycle_organelle fission_regulation of DNA metabolic process	NA	NA	DNA	other	0	433
YLR035C	MLH2	-0.484665	-0.357424	-0.324264	-0.317419	0.0831702	1.53806	0.302127	0.263782	0.275131	0.341073	Protein involved in mismatch repair and meiotic recombination; only certain frameshift intermediates are mismatch repair substrates; forms a complex with Mlh1p	Mlh1p/Mlh2p complex	DNA recombination_DNA repair_cellular response to DNA damage stimulus_meiotic cell cycle_organelle fission	NA	NA	DNA	other	0	434
YMR167W	MLH1	-0.341331	-0.608156	-0.489109	-0.157673	-0.172418	NA	NA	NA	NA	NA	Protein required for mismatch repair in mitosis and meiosis; also required for crossing over during meiosis; forms a complex with Pms1p and Msh2p-Msh3p during mismatch repair; human homolog is associated with hereditary non-polyposis colon cancer	Mlh1p/Mlh3p complex_Mlh1p/Pms1p complex_Mlh1p/Mlh2p complex	DNA recombination_DNA repair_cellular response to DNA damage stimulus_meiotic cell cycle_organelle fission	NA	NA	DNA	other	0	435
YDR369C	XRS2	-0.896496	-0.179703	-0.12786	-0.229302	0.113086	1.21475	0.160637	0.151492	0.324066	0.150691	Protein required for DNA repair; component of the Mre11 complex, which is involved in double strand breaks, meiotic recombination, telomere maintenance, and checkpoint signaling	MRX complex	DNA recombination_DNA repair_cellular response to DNA damage stimulus_meiotic cell cycle_organelle fission_sporulation_telomere organization	NA	NA	DNA	other	0	436
YNL250W	RAD50	-0.174459	-0.38418	-0.229331	-0.177942	0.05438	0.263892	0.585667	0.30032	0.34197	0.10643	Subunit of MRX complex with Mre11p and Xrs2p; complex is involved in processing double-strand DNA breaks in vegetative cells, initiation of meiotic DSBs, telomere maintenance, and nonhomologous end joining; forms nuclear foci upon DNA replication stress	MRX complex	DNA recombination_DNA repair_cellular response to DNA damage stimulus_meiotic cell cycle_organelle fission_regulation of DNA metabolic process_telomere organization	NA	NA	DNA	other	0	437
YMR224C	MRE11	-0.800943	-0.262006	-0.102063	-0.129529	0.0271245	1.15447	0.167251	0.389395	0.117284	0.441587	Nuclease subunit of the MRX complex with Rad50p and Xrs2p; complex functions in repair of DNA double-strand breaks and in telomere stability; Mre11p associates with Ser/Thr-rich ORFs in premeiotic phase; nuclease activity required for MRX function; widely conserved; forms nuclear foci upon DNA replication stress	MRX complex	DNA recombination_DNA repair_cellular response to DNA damage stimulus_meiotic cell cycle_organelle fission_sporulation	NA	NA	DNA	other	0	438
YOL090W	MSH2	0.398796	0.558355	0.329087	0.381886	-0.0993951	0.233963	0.323121	0.286034	0.437575	0.367391	Protein that binds to DNA mismatches; forms heterodimers with Msh3p and Msh6p that bind to DNA mismatches to initiate the mismatch repair process; contains a Walker ATP-binding motif required for repair activity and involved in interstrand cross-link repair; Msh2p-Msh6p binds to and hydrolyzes ATP	MSH2p/MSH6p complex_MSH2p/MSH3p complex	DNA recombination_DNA repair_DNA replication_cellular response to DNA damage stimulus_chromatin organization_meiotic cell cycle_organelle fission_regulation of DNA metabolic process	NA	NA	DNA	other	0	439
YDR097C	MSH6	-1.05886	0.338499	0.177575	0.367846	-0.0952108	2.29907	0.0807447	0.204911	0.220472	0.233127	Protein required for mismatch repair in mitosis and meiosis; forms a complex with Msh2p to repair both single-base & insertion-deletion mispairs; also involved in interstrand cross-link repair; potentially phosphorylated by Cdc28p	MSH2p/MSH6p complex	DNA repair_DNA replication_cellular response to DNA damage stimulus_meiotic cell cycle_organelle fission_regulation of DNA metabolic process	NA	NA	DNA	other	0	440
YOR368W	RAD17	0.0236809	-0.181268	-0.306673	-0.384316	0.0317156	0.989812	0.112571	0.210931	0.373815	0.315772	Checkpoint protein; involved in the activation of the DNA damage and meiotic pachytene checkpoints; with Mec3p and Ddc1p, forms a clamp that is loaded onto partial duplex DNA; homolog of human and S. pombe Rad1 and U. maydis Rec1 proteins	Rad17p/Ddc1p/Mec3p complex	DNA recombination_DNA repair_cellular response to DNA damage stimulus_meiotic cell cycle_organelle fission_regulation of cell cycle	NA	NA	DNA	other	0	441
YLR288C	MEC3	-0.069653	-0.482613	-0.507972	-0.535419	0.0157295	0.723529	0.2629	0.389456	0.234936	0.600566	DNA damage and meiotic pachytene checkpoint protein; subunit of a heterotrimeric complex (Rad17p-Mec3p-Ddc1p) that forms a sliding clamp, loaded onto partial duplex DNA by a clamp loader complex; homolog of human and S. pombe Hus1	Rad17p/Ddc1p/Mec3p complex	DNA recombination_cellular response to DNA damage stimulus_chromatin organization_regulation of cell cycle_telomere organization	NA	NA	DNA	other	0	442
YPL194W	DDC1	-0.611363	-0.387232	-0.53315	-0.355036	-0.348224	0.150204	0.28014	0.277028	0.238335	0.0650126	DNA damage checkpoint protein; part of a PCNA-like complex required for DNA damage response, required for pachytene checkpoint to inhibit cell cycle in response to unrepaired recombination intermediates; potential Cdc28p substrate; forms nuclear foci upon DNA replication stress	Rad17p/Ddc1p/Mec3p complex	DNA recombination_DNA repair_cellular response to DNA damage stimulus_meiotic cell cycle_mitotic cell cycle_organelle fission_regulation of cell cycle_regulation of organelle organization	NA	NA	DNA	other	0	443
YCR066W	RAD18	-0.517235	-0.835154	-0.456848	-0.347954	0.0807645	0.873894	0.318324	0.458146	0.102032	0.422813	E3 ubiquitin ligase; forms heterodimer with Rad6p to monoubiquitinate PCNA-K164; heterodimer binds single-stranded DNA and has single-stranded DNA dependent ATPase activity; required for postreplication repair; SUMO-targeted ubiquitin ligase (STUbl) that contains a SUMO-interacting motif (SIM) which stimulates its ubiquitin ligase activity towards the sumoylated form of PCNA	Rad6p/Rad18p complex	DNA repair_cellular response to DNA damage stimulus_protein modification by small protein conjugation or removal	NA	NA	DNA	other	0	444
YLR376C	PSY3	-0.79194	-0.774171	-0.707525	-0.466007	0.00866256	0.52673	0.460504	0.340183	0.455279	0.481871	Component of Shu complex (aka PCSS complex); Shu complex also includes Shu1, Csm2, Shu2, and promotes error-free DNA repair; promotes Rad51p filament assembly; Shu complex mediates inhibition of Srs2p function; Psy3p and Csm2p contain similar DNA-binding regions which work together to form a single DNA binding site; deletion of PSY3 results in a mutator phenotype; deletion increases sensitivity t…	NA	DNA recombination_DNA repair_cellular response to DNA damage stimulus	NA	NA	DNA	other	0	445
YPL024W	RMI1	0.262959	-0.336484	-0.436973	-0.638463	-0.444981	0.293291	0.537413	0.428017	0.553018	0.70636	Subunit of the RecQ (Sgs1p) - Topo III (Top3p) complex; stimulates superhelical relaxing, DNA catenation/decatenation and ssDNA binding activities of Top3p; involved in response to DNA damage; functions in S phase-mediated cohesion establishment via a pathway involving the Ctf18-RFC complex and Mrc1p; stimulates Top3p DNA catenation/decatenation activity; null mutants display increased rates of r…	RecQ helicase-Topo III complex	cellular response to DNA damage stimulus_chromosome segregation_mitotic cell cycle_organelle fission	NA	NA	DNA	other	0	446
YER041W	YEN1	-0.0135576	-0.459646	0.197462	-0.354924	2.91094	1.6273	0.317024	0.287232	0.470409	0.538715	Holliday junction resolvase; promotes template switching during break-induced replication (BIR), causing non-reciprocal translocations (NRTs); localization is cell-cycle dependent and regulated by Cdc28p phosphorylation; homolog of human GEN1; similar to S. cerevisiae endonuclease Rth1p	NA	DNA repair_cellular response to DNA damage stimulus	NA	NA	DNA	other	0	447
YML021C	UNG1	-1.09954	0.106641	-0.0416615	-0.174028	-0.201983	0.788887	0.428814	0.326862	0.162902	0.297686	Uracil-DNA glycosylase; required for repair of uracil in DNA formed by spontaneous cytosine deamination; efficiently excises uracil from single-stranded DNA in vivo; not required for strand-specific mismatch repair; cell-cycle regulated, expressed in late G1; localizes to mitochondria and nucleus	NA	DNA repair_cellular response to DNA damage stimulus	NA	NA	DNA	other	0	448
YOR191W	ULS1	-0.704374	-0.58885	-0.737189	-0.410568	-0.664124	NA	0.562337	0.842209	0.415416	0.577202	Swi2/Snf2-related translocase, SUMO-Targeted Ubiquitin Ligase (STUbL); required for maintenance of NHEJ inhibition at telomeres; functions at telomeres to translocate and ubiquitinylate poly-sumoylated Rap1p for proteosomal degradation; plays role in antagonizing silencing during mating-type switching; only known STUbL with a translocase activity; contains RING finger domain; relocalizes from nuc…	NA	DNA repair_cellular response to DNA damage stimulus_chromatin organization_regulation of DNA metabolic process	NA	NA	DNA	other	0	449
YDR092W	UBC13	-0.408226	-0.16027	-0.298547	-0.408747	-0.157204	0.623803	0.148671	0.239594	0.171468	0.29684	E2 ubiquitin-conjugating enzyme; involved in the error-free DNA postreplication repair pathway; interacts with Mms2p to assemble ubiquitin chains at the Ub Lys-63 residue; DNA damage triggers redistribution from the cytoplasm to the nucleus	ubiquitin conjugating enzyme complex	DNA repair_cellular response to DNA damage stimulus_protein complex biogenesis_protein modification by small protein conjugation or removal	NA	NA	DNA	other	0	450
YBR223C	TDP1	-0.509416	-0.508203	-0.43443	-0.480833	-0.0685134	0.757763	0.254539	0.100945	0.145858	0.423614	Tyrosyl-DNA phosphodiesterase I; hydrolyzes 3' and 5'-phosphotyrosyl bonds; involved in the repair of DNA lesions created by topoisomerase I and topoisomerase II; mutations in human homolog result in the neurodegenerative disease SCAN1	NA	DNA repair_cellular response to DNA damage stimulus	NA	NA	DNA	other	0	451
YNL309W	STB1	0.0182046	-0.400469	0.259689	0.0781936	0.161676	0.828495	0.484453	0.169011	0.219513	0.152149	Protein with role in regulation of MBF-specific transcription at Start; phosphorylated by Cln-Cdc28p kinases in vitro; unphosphorylated form binds Swi6p, which is required for Stb1p function; expression is cell-cycle regulated; STB1 has a paralog, YOL131W, that arose from the whole genome duplication	NA	mitotic cell cycle_transcription from RNA polymerase II promoter	NA	yetfasco	DNA	other	0	452
YJL092W	SRS2	-0.056996	-0.206548	-0.341325	-0.475059	-0.653546	0.536177	0.242988	0.399568	0.371311	0.430577	DNA helicase and DNA-dependent ATPase; involved in DNA repair and checkpoint recovery, needed for proper timing of commitment to meiotic recombination and transition from Meiosis I to II; blocks trinucleotide repeat expansion; affects genome stability; disassembles Rad51p nucleoprotein filaments during meiotic recombination; stimulates activity of the Mus81p-Mms4p endonuclease, independently of S…	NA	DNA recombination_DNA repair_cellular response to DNA damage stimulus_regulation of DNA metabolic process	NA	NA	DNA	other	0	453
YER116C	SLX8	0.406473	-0.276861	-0.546387	-0.445984	0.561405	NA	NA	NA	NA	NA	Subunit of Slx5-Slx8 SUMO-targeted ubiquitin ligase (STUbL) complex; stimulated by prior attachment of SUMO to the substrate; contains a C-terminal RING domain; forms nuclear foci upon DNA replication stress; null mutants are aneuploid, have a metaphase delay, and spindle defects including: mispositioned spindles, fish hook spindles, and aberrant spindle kinetics; required for maintenance of geno…	Slx5p/Slx8p complex	cellular response to DNA damage stimulus_peptidyl-amino acid modification_protein modification by small protein conjugation or removal_telomere organization	NA	NA	DNA	other	0	454
YLR135W	SLX4	0.0155316	-0.298622	-0.403569	-0.597319	-0.612058	1.32234	0.268109	0.64498	0.488215	0.834021	Endonuclease involved in processing DNA; acts during recombination, repair; promotes template switching during break-induced replication (BIR), causing non-reciprocal translocations (NRTs); cleaves branched structures in complex with Slx1p; involved in interstrand cross-link repair, Rad1p/Rad10p-dependent removal of 3'-nonhomologous tails during DSBR via single-strand annealing; relative distribu…	Slx1p/Slx4p complex	DNA recombination_DNA repair_DNA replication_cellular response to DNA damage stimulus_meiotic cell cycle_organelle fission_regulation of DNA metabolic process_regulation of cell cycle_regulation of organelle organization	NA	NA	DNA	other	0	455
YAL027W	SAW1	NA	NA	NA	NA	NA	NA	NA	NA	NA	NA	5'- and 3'-flap DNA binding protein; recruits Rad1p-Rad10p to single-strand annealing intermediates with 3' non-homologous tails for removal during double-strand break repair; complexes with Rad1p-Rad10p and stimulates its endonuclease activity; green fluorescent protein (GFP)-fusion protein localizes to the nucleus	NA	DNA repair_cellular response to DNA damage stimulus_regulation of DNA metabolic process	NA	NA	DNA	other	0	456
YGL175C	SAE2	-0.104037	-0.47449	-0.461419	-0.792535	-0.593507	0.761586	0.280702	0.237816	0.158124	0.371344	Endonuclease required for telomere elongation; also required for telomeric 5' C-rich strand resection; involved in processing hairpin DNA structures with MRX complex; involved in double-strand break repair; sumoylation and phosphorylation both required for function; exists in form of inactive oligomers that are transiently released into smaller active units by a series of phosphorylations; DNA da…	NA	DNA recombination_DNA repair_cellular response to DNA damage stimulus_meiotic cell cycle_organelle fission_telomere organization	NA	NA	DNA	other	0	457
YHR154W	RTT107	NA	NA	NA	NA	NA	NA	NA	NA	NA	NA	Protein implicated in Mms22-dependent DNA repair during S phase; involved in recruiting the SMC5/6 complex to double-strand breaks; DNA damage induces phosphorylation by Mec1p at one or more SQ/TQ motifs; interacts with Mms22p and Slx4p; has four BRCT domains; has a role in regulation of Ty1 transposition; relative distribution to nuclear foci increases upon DNA replication stress	NA	DNA repair_cellular response to DNA damage stimulus_regulation of DNA metabolic process_regulation of cell cycle_transposition	NA	NA	DNA	other	0	458
YHR031C	RRM3	-0.469275	-0.294628	-0.519235	-0.416572	0.0190492	1.40695	0.535137	0.277028	0.2784	0.36444	DNA helicase involved in rDNA replication and Ty1 transposition; binds to and suppresses DNA damage at G4 motifs in vivo; relieves replication fork pauses at telomeric regions; structurally and functionally related to Pif1p	NA	DNA replication_mitochondrion organization_regulation of DNA metabolic process	NA	NA	DNA	other	0	459
YER070W	RNR1	0.000982126	-0.287819	-0.124715	-0.394561	0.201825	NA	0.00979444	0.201993	0.0952215	0.364022	Major isoform of large subunit of ribonucleotide-diphosphate reductase; the RNR complex catalyzes rate-limiting step in dNTP synthesis, regulated by DNA replication and DNA damage checkpoint pathways via localization of small subunits; relative distribution to the nucleus increases upon DNA replication stress; RNR1 has a paralog, RNR3, that arose from the whole genome duplication	ribonucleoside-diphosphate reductase complex	nucleobase-containing small molecule metabolic process	NA	NA	metabolism	other	0	460
YBR073W	RDH54	-0.122453	-0.175528	-0.511927	-0.201969	-0.55656	0.526424	0.195957	0.349066	0.110063	0.254694	DNA-dependent ATPase; DNA recombination/repair translocase, supercoils DNA and promotes DNA strand opening; stimulates strand exchange by modifying dsDNA topology; involved in recombinational repair of DNA double-strand breaks (DSBs) during mitosis and meiosis; phosphorylated in Mec1p-, Rad53p-dependent way in response to one DSB; contributes to remodelling of nucleosomes; proposed to be involved…	NA	DNA recombination_DNA repair_cellular response to DNA damage stimulus_chromosome segregation_meiotic cell cycle_organelle fission	NA	NA	DNA	other	0	461
YJR052W	RAD7	-0.214845	0.189013	0.278659	0.249648	0.186105	0.149321	0.293185	0.0913952	0.189099	0.0284029	Nucleotide excision repair (NER) protein; binds damaged DNA during NER; binds DNA in an ATP-dependent manner (with Rad16p) during NER; required for repair of non-transcribed chromatin; subunit of Nucleotide Excision Repair Factor 4 (NEF4) and the Elongin-Cullin-Socs (ECS) ligase complex	nucleotide-excision repair factor 4 complex_Cul3p-RING ubiquitin ligase complex	DNA repair_cellular response to DNA damage stimulus_protein modification by small protein conjugation or removal_proteolysis involved in cellular protein catabolic process	NA	NA	DNA	other	0	462
YDL059C	RAD59	-0.654728	-0.521935	-0.528055	-0.587671	-0.716564	1.14588	0.395354	0.326191	0.293858	1.03382	Protein involved DNA double-strand break repair; repairs breaks in DNA during vegetative growth via recombination and single-strand annealing; anneals complementary single-stranded DNA; forms nuclear foci upon DNA replication stress; required for loading of Rad52p to DSBs; paralog of Rad52p	NA	DNA recombination_DNA repair_cellular response to DNA damage stimulus_regulation of DNA metabolic process_telomere organization	NA	NA	DNA	other	0	463
YDR004W	RAD57	0.0865553	-0.725912	-0.595444	-0.669973	-0.335217	0.658475	0.161058	0.340333	0.366879	0.438704	Protein that stimulates strand exchange; stimulates strand exchange by stabilizing the binding of Rad51p to single-stranded DNA; involved in the recombinational repair of double-strand breaks in DNA during vegetative growth and meiosis; forms heterodimer with Rad55p	other DNA repair complexes	DNA recombination_DNA repair_cellular response to DNA damage stimulus_meiotic cell cycle_organelle fission_telomere organization	NA	NA	DNA	other	0	464
YDR076W	RAD55	0.392894	-0.274386	-0.49111	-0.555906	-0.113312	0.649378	0.313576	0.134274	0.0662596	0.369682	Protein that stimulates strand exchange; stimulates strand exchange by stabilizing the binding of Rad51p to single-stranded DNA; involved in the recombinational repair of double-strand breaks in DNA during vegetative growth and meiosis; forms heterodimer with Rad57p	other DNA repair complexes	DNA recombination_DNA repair_cellular response to DNA damage stimulus_meiotic cell cycle_organelle fission	NA	NA	DNA	other	0	465
YGL163C	RAD54	0.0387295	-0.490898	-0.533706	-0.517215	-0.117793	0.239572	0.400059	0.288272	0.335161	0.448567	DNA-dependent ATPase that stimulates strand exchange; modifies the topology of double-stranded DNA; involved in the recombinational repair of double-strand breaks in DNA during vegetative growth and meiosis; member of the SWI/SNF family of DNA translocases; forms nuclear foci upon DNA replication stress	NA	DNA recombination_DNA repair_cellular response to DNA damage stimulus_chromatin organization_regulation of DNA metabolic process_telomere organization	NA	NA	DNA	other	0	466
YML032C	RAD52	-0.272769	-0.400694	-0.404197	-0.398032	-0.00858056	NA	0.0537979	0.12505	0.176971	0.547598	Protein that stimulates strand exchange; stimulates strand exchange by facilitating Rad51p binding to single-stranded DNA; anneals complementary single-stranded DNA; involved in the repair of double-strand breaks in DNA during vegetative growth and meiosis and UV induced sister chromatid recombination	NA	DNA recombination_DNA repair_cellular response to DNA damage stimulus_meiotic cell cycle_organelle fission_telomere organization	NA	NA	DNA	other	0	467
YLR032W	RAD5	-0.778307	-0.468462	-0.504163	-0.420523	-0.424807	1.28292	0.452764	0.276503	0.178316	0.491663	DNA helicase/Ubiquitin ligase; involved in error-free DNA damage tolerance (DDT), replication fork regression during postreplication repair by template switching, error-prone translesion synthesis; promotes synthesis of free and PCNA-bound polyubiquitin chains by Ubc13p-Mms2p; forms nuclear foci upon DNA replication stress; associates with native telomeres, cooperates with homologous recombinatio…	NA	DNA repair_cellular response to DNA damage stimulus_protein complex biogenesis_protein modification by small protein conjugation or removal	NA	NA	DNA	other	0	468
YER162C	RAD4	-0.38356	0.253999	-0.0176495	-0.20443	0.0774904	1.25656	0.0970912	0.169643	0.229692	0.227951	Protein that recognizes and binds damaged DNA (with Rad23p) during NER; subunit of Nuclear Excision Repair Factor 2 (NEF2); also involved, with Rad23p, in turnover of ubiquitylated proteins; Rad4p-Rad23p heterodimer binds to promoters of DNA damage response genes to repress their transcription in the absence of DNA damage; NER stands for nucleotide excision repair	nucleotide-excision repair factor 2 complex	DNA repair_cellular response to DNA damage stimulus_proteolysis involved in cellular protein catabolic process_transcription from RNA polymerase II promoter	NA	NA	DNA	other	0	469
YDR314C	RAD34	-0.875554	-0.41463	-0.461144	-0.760339	-0.87668	0.232912	0.152916	0.114971	0.43221	0.113245	Protein involved in nucleotide excision repair (NER); homologous to RAD4	NA	DNA repair_cellular response to DNA damage stimulus	NA	NA	DNA	other	0	470
YGR258C	RAD2	0.262169	-0.106017	0.156312	0.218258	-0.150144	0.150249	0.56073	0.170475	0.364697	0.445151	Single-stranded DNA endonuclease; cleaves single-stranded DNA during nucleotide excision repair to excise damaged DNA; subunit of Nucleotide Excision Repair Factor 3 (NEF3); homolog of human XPG protein	nucleotide-excision repair factor 3 complex	DNA repair_cellular response to DNA damage stimulus_transcription from RNA polymerase II promoter	NA	NA	DNA	other	0	471
YBR114W	RAD16	-0.591585	0.0330482	-0.220479	-0.0670134	-0.457055	1.32494	0.328786	0.0254585	0.447438	0.582133	Nucleotide excision repair (NER) protein; binds damaged DNA during NER; binds DNA in an ATP-dependent manner (with Rad7p) during NER; required for NER of non-transcribed chromatin; subunit of Nucleotide Excision Repair Factor 4 (NEF4) and the Elongin-Cullin-Socs (ECS) ligase complex	nucleotide-excision repair factor 4 complex_Cul3p-RING ubiquitin ligase complex	DNA repair_cellular response to DNA damage stimulus_protein modification by small protein conjugation or removal_proteolysis involved in cellular protein catabolic process	NA	NA	DNA	other	0	472
YMR201C	RAD14	0.354965	-0.057767	-0.324581	0.182577	0.0602683	0.770651	0.182401	0.0580762	0.21408	0.157993	Protein that recognizes and binds damaged DNA during NER; subunit of Nucleotide Excision Repair Factor 1 (NEF1); contains zinc finger motif; homolog of human XPA protein; NER stands for nucleotide excision repair	nucleotide-excision repair factor 1 complex	DNA repair_cellular response to DNA damage stimulus	NA	NA	DNA	other	0	473
YMR137C	PSO2	-1.51482	-0.434082	-0.658884	-0.507886	-1.02121	NA	0.172331	0.58481	0.302148	0.781033	Nuclease required for DNA single- and double-strand break repair; acts at a post-incision step in repair of breaks that result from interstrand cross-links produced by a variety of mono- and bi-functional psoralen derivatives; induced by UV-irradiation; forms nuclear foci upon DNA replication stress	NA	DNA repair_cellular response to DNA damage stimulus	NA	NA	DNA	other	0	474
YML061C	PIF1	0.338025	-0.31069	-0.359529	-0.502527	-0.743597	0.407914	0.249204	0.231509	0.127602	0.524853	DNA helicase, potent G-quadruplex DNA binder/unwinder; possesses strand annealing activity; promotes DNA synthesis during break-induced replication; important for crossover recombination; translation from different start sites produces mitochondrial and nuclear forms; nuclear form is a catalytic inhibitor of telomerase; mitochondrial form involved in DNA repair and recombination; mutations affect…	NA	DNA recombination_DNA repair_DNA replication_cellular response to DNA damage stimulus_mitochondrion organization_regulation of DNA metabolic process_regulation of organelle organization_telomere organization	NA	NA	DNA	other	0	475
YOR386W	PHR1	-0.0178512	-0.408536	0.127765	-0.330146	-0.275107	0.178073	0.556473	0.30363	0.228067	0.236069	DNA photolyase involved in photoreactivation; repairs pyrimidine dimers in the presence of visible light; induced by DNA damage; regulated by transcriptional repressor Rph1p	NA	DNA repair_cellular response to DNA damage stimulus	NA	NA	DNA	other	0	476
YOL043C	NTG2	-0.000754282	-0.74367	-0.629424	-0.52098	-0.201358	0.446431	0.0226674	0.187377	0.0192581	0.442542	DNA N-glycosylase and apurinic/apyrimidinic (AP) lyase; involved in base excision repair, localizes to the nucleus; sumoylated; NTG2 has a paralog, NTG1, that arose from the whole genome duplication	NA	DNA repair_cellular response to DNA damage stimulus	NA	NA	DNA	other	0	477
YAL015C	NTG1	-0.701885	-0.616346	-0.192461	-0.426552	0.17095	0.287472	0.347444	0.469811	0.190781	0.241902	DNA N-glycosylase and apurinic/apyrimidinic (AP) lyase; involved in base excision repair; acts in both nucleus and mitochondrion; creates a double-strand break at mtDNA origins that stimulates replication in response to oxidative stress; required for maintaining mitochondrial genome integrity; NTG1 has a paralog, NTG2, that arose from the whole genome duplication	NA	DNA repair_DNA replication_cellular response to DNA damage stimulus_mitochondrion organization_regulation of DNA metabolic process_regulation of organelle organization_response to chemical_response to oxidative stress	NA	NA	DNA	other	0	478
YLR265C	NEJ1	-0.326644	-0.291176	-0.131632	-0.260892	0.00580282	NA	0.373549	0.528674	0.26889	0.572761	Protein involved in regulation of nonhomologous end joining; interacts with DNA ligase IV components Dnl4p and Lif1p; repressed by MAT heterozygosity; regulates cellular distribution of Lif1p	NA	DNA repair_cellular response to DNA damage stimulus	NA	NA	DNA	other	0	479
YGL087C	MMS2	-1.65914	-0.291103	0.0511739	-0.0966456	0.384307	1.0293	0.109068	0.12346	0.0313439	0.297827	Ubiquitin-conjugating enzyme variant; involved in error-free postreplication repair; forms a heteromeric complex with Ubc13p, an active ubiquitin-conjugating enzyme; cooperates with chromatin-associated RING finger proteins, Rad18p and Rad5p; protein abundance increases in response to DNA replication stress	ubiquitin conjugating enzyme complex	DNA repair_cellular response to DNA damage stimulus_protein complex biogenesis_protein modification by small protein conjugation or removal	NA	NA	DNA	other	0	480
YER142C	MAG1	-0.29016	-0.298649	-0.46975	-0.226339	0.215115	0.370394	0.25182	0.416397	0.489379	0.315969	3-methyl-adenine DNA glycosylase; involved in protecting DNA against alkylating agents; initiates base excision repair by removing damaged bases to create abasic sites that are subsequently repaired; protein abundance increases in response to DNA replication stress	NA	DNA repair_cellular response to DNA damage stimulus	NA	NA	DNA	other	0	481
YDR499W	LCD1	-0.0657073	-0.284	-0.309877	-0.662552	-0.912919	0.590606	0.354698	0.154778	0.00660687	0.397664	Essential protein required for the DNA integrity checkpoint pathways; interacts physically with Mec1p; putative homolog of S. pombe Rad26 and human ATRIP; forms nuclear foci upon DNA replication stress	NA	cellular response to DNA damage stimulus_regulation of cell cycle_telomere organization	NA	NA	DNA	other	0	482
YML058W-A	HUG1	-0.830625	-0.336225	-0.456158	-0.498895	0.136694	1.05089	0.448135	0.275617	0.243796	0.171377	Protein involved in the Mec1p-mediated checkpoint pathway; transcription is induced by DNA damage; protein abundance increases in response to DNA replication stress	NA	cellular response to DNA damage stimulus_regulation of cell cycle	NA	NA	DNA	other	0	483
YOR258W	HNT3	-0.143992	-0.641276	-0.372653	-0.291393	-0.304586	0.559819	0.363888	0.0855206	0.271048	0.146224	DNA 5' AMP hydrolase involved in DNA repair; member of the histidine triad (HIT) superfamily of nucleotide-binding proteins; homolog of Aprataxin, a Hint related protein that is mutated in individuals with ataxia with oculomotor apraxia; relative distribution to nuclear foci decreases upon DNA replication stress	NA	cellular response to DNA damage stimulus	NA	NA	DNA	other	0	484
YOR033C	EXO1	-0.392477	-0.419332	-0.549459	-0.634032	-1.05409	0.933709	0.0798255	0.529491	0.284412	0.702372	5'-3' exonuclease and flap-endonuclease; involved in recombination, double-strand break repair, MMS2 error-free branch of the post replication (PRR) pathway and DNA mismatch repair; role in telomere maintenance; member of the Rad2p nuclease family, with conserved N and I nuclease domains; relative distribution to the nucleus increases upon DNA replication stress; EXO1 has a paralog, DIN7, that ar…	NA	DNA recombination_DNA repair_cellular response to DNA damage stimulus_meiotic cell cycle_telomere organization	NA	NA	DNA	other	0	485
YMR173W	DDR48	-1.05901	0.0819913	-0.30016	-0.104106	-0.2313	0.509671	0.0253592	0.562475	0.173983	0.20284	DNA damage-responsive protein; expression is increased in response to heat-shock stress or treatments that produce DNA lesions; contains multiple repeats of the amino acid sequence NNNDSYGS; protein abundance increases in response to DNA replication stress	NA	DNA repair_cellular response to DNA damage stimulus	NA	NA	DNA	other	0	486
YDL220C	CDC13	0.474706	-0.389027	-0.53895	-0.0548864	-0.214967	0.320427	0.477995	0.566277	0.469759	0.294396	Single stranded DNA-binding protein found at TG1-3 telomere G-tails; key roles in regulation of telomerase, telomere end protection, conventional telomere replication; regulates telomere replication through recruitment of specific sub-complexes, essential function is telomere capping; forms homodimer via N-terminus; disruption of dimerization leads to short telomeres; autophagy and proteasome are…	NA	regulation of DNA metabolic process_regulation of organelle organization_telomere organization	NA	NA	DNA	other	0	487
YBL019W	APN2	0.103317	-0.702899	-0.44925	-0.14408	-0.272985	0.212152	0.11899	0.224155	0.0612272	0.371986	Class II abasic (AP) endonuclease involved in repair of DNA damage; homolog of human HAP1 and E. coli exoIII	NA	DNA repair_cellular response to DNA damage stimulus	NA	NA	DNA	other	0	488
YKL114C	APN1	-0.548532	-0.189532	-0.402028	-0.335226	-0.694129	0.934373	0.29477	0.122058	0.196776	0.731206	Major apurinic/apyrimidinic endonuclease; 3'-repair diesterase; involved in repair of DNA damage by oxidation and alkylating agents; also functions as a 3'-5' exonuclease to repair 7,8-dihydro-8-oxodeoxyguanosine; genetically interacts with NTG1 to maintain mitochondrial genome integrity	NA	DNA repair_cellular response to DNA damage stimulus	NA	NA	DNA	other	0	489
YER095W	RAD51	0.418096	0.519318	0.535292	0.216476	0.418452	0.805011	0.0247895	0.183032	0.280247	0.716181	Strand exchange protein; forms a helical filament with DNA that searches for homology; involved in the recombinational repair of double-strand breaks in DNA during vegetative growth and meiosis; homolog of Dmc1p and bacterial RecA protein	NA	DNA recombination_meiotic cell cycle_organelle fission_telomere organization	NA	NA	DNA	other	0	490
YEL037C	RAD23	0.691579	1.02466	0.875973	0.600189	-0.238992	0.904517	0.342206	0.373866	0.448657	0.512146	Protein with ubiquitin-like N terminus; subunit of Nuclear Excision Repair Factor 2 (NEF2) with Rad4p that binds damaged DNA; enhances protein deglycosylation activity of Png1p; also involved, with Rad4p, in ubiquitylated protein turnover; Rad4p-Rad23p heterodimer binds to promoters of DNA damage response genes to repress their transcription in the absence of DNA damage	nucleotide-excision repair factor 2 complex_Png1p/Rad23p complex	proteolysis involved in cellular protein catabolic process_response to chemical_transcription from RNA polymerase II promoter	NA	NA	DNA	other	0	491
YER089C	PTC2	-0.22719	0.920996	0.630739	0.748395	-0.211678	0.382836	0.194072	0.271478	0.0704301	0.0642644	Type 2C protein phosphatase (PP2C); dephosphorylates Hog1p to limit maximal osmostress induced kinase activity; dephosphorylates Ire1p to downregulate the unfolded protein response; dephosphorylates Cdc28p; inactivates the DNA damage checkpoint; PTC2 has a paralog, PTC3, that arose from the whole genome duplication	NA	cellular response to DNA damage stimulus_protein dephosphorylation_protein phosphorylation_regulation of cell cycle_regulation of protein modification process_response to chemical_response to osmotic stress_signaling	NA	NA	DNA	other	0	492
YML011C	RAD33	-1.19613	-0.148498	-0.233409	0.222511	-0.0643822	1.16044	0.242887	0.344332	0.435747	0.436955	Protein involved in nucleotide excision repair; green fluorescent protein (GFP)-fusion protein localizes to the nucleus	NA	DNA repair_cellular response to DNA damage stimulus	NA	NA	DNA	other	0	493
YPL022W	RAD1	0.121057	0.353072	0.0790531	0.111143	0.137556	0.270943	0.2779	0.445189	0.16106	0.123972	Single-stranded DNA endonuclease (with Rad10p); cleaves single-stranded DNA during nucleotide excision repair and double-strand break repair; subunit of Nucleotide Excision Repair Factor 1 (NEF1); homolog of human XPF protein	nucleotide-excision repair factor 1 complex	DNA recombination_DNA repair_cellular response to DNA damage stimulus_meiotic cell cycle_organelle fission	NA	NA	DNA	other	0	494
YDR291W	HRQ1	0.15873	0.0894049	0.0408018	0.393557	-0.107557	1.14168	0.444968	0.300908	0.23253	0.536267	3'-5' DNA helicase that has DNA strand annealing activity; helicase activity is stimulated by fork structure and 3'-tail length of substrates; acts with Rad4p in nucleotide-excision repair; belongs to the widely conserved RecQ family of proteins which are involved in maintaining genomic integrity; similar to the human RecQ4p implicated in Rothmund-Thomson syndrome (RTS)	NA	DNA repair_cellular response to DNA damage stimulus	NA	NA	DNA	other	0	495
YDL126C	CDC48	-0.196609	0.351025	0.104471	0.246152	-0.151024	0.532109	0.136709	0.305051	0.126368	0.414971	AAA ATPase; subunit of polyubiquitin-selective segregase complex involved in ERAD, cell wall integrity during heat stress, mitotic spindle disassembly; role in mobilizing membrane bound transcription factors by regulated ubiquitin/proteasome-dependent processing in macroautophagy, PMN, RAD, ribophagy, homotypic ER membrane fusion, disassembly of Met30p from SCF complex, telomerase regulation via …	Cdc48p complex	RNA catabolic process_chromatin organization_chromosome segregation_cytoskeleton organization_histone modification_membrane fusion_mitotic cell cycle_organelle fusion_protein modification by small protein conjugation or removal_proteolysis involved in cellular protein catabolic process_regulation of DNA metabolic process_regulation of protein modification process_response to chemical	NA	NA	RNA	other	8	496
YHR064C	SSZ1	-0.27572	-0.288729	-0.0310641	-0.732639	-0.602157	1.09793	0.169438	0.413832	0.373293	1.66985	Hsp70 protein that interacts with Zuo1p (a DnaJ homolog); interacts with Zuo1p to form a ribosome-associated complex that binds the ribosome via the Zuo1p subunit; also involved in pleiotropic drug resistance via sequential activation of PDR1 and PDR5; binds ATP	Ribosome-associated complex (RAC)	cytoplasmic translation_rRNA processing_regulation of translation_translational elongation	NA	NA	RNA	other	0	497
YAL005C	SSA1	1.86699	3.04974	2.9169	2.76391	1.64008	0.634694	0.0443361	0.10491	0.0865035	0.180137	ATPase involved in protein folding and NLS-directed nuclear transport; member of HSP70 family; forms chaperone complex with Ydj1p; localized to nucleus, cytoplasm, and cell wall; 98% identical with paralog Ssa2p, but subtle differences between the two proteins provide functional specificity with respect to propagation of yeast [URE3] prions and vacuolar-mediated degradations of gluconeogenesis en…	NA	cytoplasmic translation_mitochondrion organization_nuclear transport_protein folding_protein modification by small protein conjugation or removal_protein targeting_proteolysis involved in cellular protein catabolic process_transmembrane transport	NA	NA	DNA	other	8	498
YLL024C	SSA2	2.47379	3.61836	3.23388	3.10953	1.25134	0.518947	0.23827	0.233112	0.324131	0.919331	ATP-binding protein; involved in protein folding and vacuolar import of proteins; member of heat shock protein 70 (HSP70) family; associated with the chaperonin-containing T-complex; present in the cytoplasm, vacuolar membrane and cell wall; 98% identical to paralog Ssa1p, but has distinct functional specificity in propagation of yeast [URE3] prions and vacuolar-mediated degradation of gluconeoge…	NA	nuclear transport_nucleobase-containing compound transport_protein folding_protein targeting_proteolysis involved in cellular protein catabolic process_transmembrane transport	NA	NA	DNA	other	8	499
YMR186W	HSC82	0.170925	1.21822	1.15544	1.19705	0.376163	0.651857	0.188965	0.196071	0.289191	0.485896	Cytoplasmic chaperone of the Hsp90 family; plays a role in determining prion variants; redundant in function and nearly identical with Hsp82p, and together they are essential; expressed constitutively at 10-fold higher basal levels than HSP82 and induced 2-3 fold by heat shock; contains two acid-rich unstructured regions that promote the solubility of chaperone-substrate complexes; HSC82 has a pa…	HMC Complex	protein complex biogenesis_protein folding_response to heat_telomere organization	NA	NA	other	other	8	500
YPL240C	HSP82	0.684954	0.717574	0.724382	0.520399	0.367716	0.383533	0.229643	0.226335	0.0980978	0.194166	Hsp90 chaperone; redundant in function with Hsc82p; required for pheromone signaling, negative regulation of Hsf1p; docks with Tom70p for mitochondrial preprotein delivery; promotes telomerase DNA binding, nucleotide addition; protein abundance increases in response to DNA replication stress; contains two acid-rich unstructured regions that promote solubility of chaperone-substrate complexes; HSP…	NA	mitochondrion organization_protein complex biogenesis_protein folding_protein maturation_protein targeting_regulation of DNA metabolic process_regulation of organelle organization_response to osmotic stress_telomere organization	NA	NA	DNA	other	8	501
YNL007C	SIS1	2.03276	1.39815	1.07161	0.813252	2.02805	1.9099	0.232344	0.164946	0.720429	0.646391	Type II HSP40 co-chaperone that interacts with the HSP70 protein Ssa1p; shuttles between cytosol and nucleus; mediates delivery of misfolded proteins into the nucleus for degradation; involved in proteasomal degradation of misfolded cytosolic proteins; protein abundance increases in response to DNA replication stress; polyQ aggregates sequester Sis1p and interfere with clearance of misfolded prot…	NA	nuclear transport_nucleobase-containing compound transport_protein folding_proteolysis involved in cellular protein catabolic process_response to chemical_translational initiation	NA	NA	DNA	other	8	502
YLL026W	HSP104	-0.00386812	0.699608	0.650436	0.75165	-0.0544493	1.27008	0.397388	0.226703	0.380528	0.519848	Disaggregase; heat shock protein that cooperates with Ydj1p (Hsp40) and Ssa1p (Hsp70) to refold and reactivate previously denatured, aggregated proteins; responsive to stresses including: heat, ethanol, and sodium arsenite; involved in [PSI+] propagation; protein becomes more abundant and forms cytoplasmic foci in response to DNA replication stress; potentiated Hsp104p variants decrease TDP-43 pr…	NA	carbohydrate metabolic process_oligosaccharide metabolic process_protein folding_response to chemical_response to heat_response to oxidative stress	NA	NA	metabolism	other	8	503
YFL014W	HSP12	-0.310775	-0.672118	-0.342566	-0.343207	-0.0592657	0.212011	0.661055	0.440435	0.14082	0.247469	Plasma membrane protein involved in maintaining membrane organization; involved in maintaining organization during stress conditions; induced by heat shock, oxidative stress, osmostress, stationary phase, glucose depletion, oleate and alcohol; protein abundance increased in response to DNA replication stress and dietary restriction; regulated by the HOG and Ras-Pka pathways; required for dietary …	NA	response to chemical_response to heat_response to osmotic stress_response to oxidative stress	NA	NA	other	other	8	504
YIL153W	RRD1	-0.210226	-0.0822847	-0.254572	-0.205731	0.224927	1.68353	0.291855	0.283629	0.212996	0.28829	Peptidyl-prolyl cis/trans-isomerase; activator of the phosphotyrosyl phosphatase activity of PP2A; involved in G1 phase progression, microtubule dynamics, bud morphogenesis and DNA repair; required for rapid reduction of Sgs1p levels in response to rapamycin; subunit of the Tap42p-Sit4p-Rrd1p complex; protein increases in abundance and relative distribution to the nucleus increases upon DNA repli…	Tap42p/Sit4p/Rrd1p complex	DNA repair_cellular response to DNA damage stimulus_cytoskeleton organization_mitotic cell cycle_response to osmotic stress_transcription from RNA polymerase II promoter	NA	NA	DNA	other	0	505
YDR155C	CPR1	0.501181	0.989489	1.04513	0.888562	0.229497	0.665369	0.15166	0.375625	0.1503	0.290899	Cytoplasmic peptidyl-prolyl cis-trans isomerase (cyclophilin); catalyzes the cis-trans isomerization of peptide bonds N-terminal to proline residues; binds the drug cyclosporin A; N-terminally propionylated in vivo; protein abundance increases in response to DNA replication stress	Set3p complex	chromatin organization_histone modification_meiotic cell cycle_organelle fission_regulation of cell cycle_regulation of organelle organization_sporulation	NA	NA	DNA	other	8	506
YNL123W	NMA111	-0.258183	0.745813	0.433383	0.625566	-0.349696	0.715894	0.288934	0.227872	0.0977919	0.279289	Serine protease and general molecular chaperone; involved in response to heat stress and promotion of apoptosis; may contribute to lipid homeostasis; sequence similarity to the mammalian Omi/HtrA2 family of serine proteases	NA	lipid metabolic process_response to heat	NA	NA	metabolism	other	8	507
YJR017C	ESS1	-0.168519	0.0541516	0.329765	0.16384	0.322909	0.360163	0.369929	0.280176	0.340951	0.23792	Peptidylprolyl-cis/trans-isomerase (PPIase); specific for phosphorylated Ser and Thr residues N-terminal to proline; regulates phosphorylation of RNAPII large subunit (Rpo21p) C-terminal domain (CTD) at Ser7; associates with phospho-Ser5 form of RNAPII in vivo; present along entire coding length of genes; represses initiation of CUTs; required for efficient termination of mRNA transcription, trim…	NA	DNA-templated transcription, initiation_DNA-templated transcription, termination_chromatin organization_histone modification_mitotic cell cycle_peptidyl-amino acid modification_protein alkylation_protein complex biogenesis_protein dephosphorylation_protein modification by small protein conjugation or removal_protein phosphorylation_proteolysis involved in cellular protein catabolic process_regula…	NA	NA	DNA	other	8	508
YJR032W	CPR7	-0.172129	0.205963	0.491085	-0.00405643	-0.34161	0.164492	0.152742	0.228819	0.23575	0.828263	Peptidyl-prolyl cis-trans isomerase (cyclophilin); catalyzes the cis-trans isomerization of peptide bonds N-terminal to proline residues; binds to Hsp82p and contributes to chaperone activity; plays a role in determining prion variants	NA	protein folding_response to heat	NA	NA	other	other	8	509
YNL135C	FPR1	1.49623	1.57337	1.75831	1.99369	1.28998	0.371574	0.293039	0.156068	0.0541576	0.279365	Peptidyl-prolyl cis-trans isomerase (PPIase); binds to the drugs FK506 and rapamycin; also binds to the nonhistone chromatin binding protein Hmo1p and may regulate its assembly or function; N-terminally propionylated in vivo; mutation is functionally complemented by human FKBP1A	NA	cellular amino acid metabolic process_chromatin organization_protein folding	NA	NA	DNA	other	8	510
YLR216C	CPR6	-1.13408	0.358269	0.442065	0.300317	-0.126282	3.14782	0.140112	0.127767	0.309315	0.372767	Peptidyl-prolyl cis-trans isomerase (cyclophilin); catalyzes the cis-trans isomerization of peptide bonds N-terminal to proline residues; plays a role in determining prion variants; binds to Hsp82p and contributes to chaperone activity; protein abundance increases in response to DNA replication stress	NA	protein folding	NA	NA	other	other	8	511
YML074C	FPR3	-1.0093	0.216353	0.500662	0.21571	-0.0799428	0.31259	0.267066	0.390652	0.112632	0.220267	Nucleolar peptidyl-prolyl cis-trans isomerase (PPIase); FK506 binding protein; affects expression of multiple genes via its role in nucleosome assembly; phosphorylated by casein kinase II (Cka1p-Cka2p-Ckb1p-Ckb2p) and dephosphorylated by Ptp1p; PPIase domain acts as a transcriptional repressor when tethered to DNA by lexA, and repressor activity is dependent on PPIase activity; FPR3 has a paralog…	NA	chromatin organization_meiotic cell cycle_organelle fission_regulation of cell cycle_regulation of organelle organization	NA	NA	DNA	other	8	512
YLR449W	FPR4	0.0789727	0.514195	0.305779	0.209703	-0.343353	0.228639	0.0324163	0.00499024	0.36649	0.506605	Peptidyl-prolyl cis-trans isomerase (PPIase); nuclear proline isomerase; affects expression of multiple genes via its role in nucleosome assembly; catalyzes isomerization of proline residues in histones H3 and H4, which affects lysine methylation of those histones; PPIase domain acts as a transcriptional repressor when tethered to DNA by lexA, and repressor activity is dependent on PPIase activit…	NA	chromatin organization_histone modification_peptidyl-amino acid modification_protein alkylation_regulation of protein modification process	NA	NA	DNA	other	8	513
YLR153C	ACS2	0.637403	1.89261	1.72744	1.71898	1.13871	0.680144	0.144908	0.412485	0.205697	0.539919	Acetyl-coA synthetase isoform; along with Acs1p, acetyl-coA synthetase isoform is the nuclear source of acetyl-coA for histone acetylation; mutants affect global transcription; required for growth on glucose; expressed under anaerobic conditions	NA	chromatin organization_cofactor metabolic process_histone modification_peptidyl-amino acid modification_protein acylation	NA	NA	DNA	other	9	514
YAL054C	ACS1	-0.411603	-0.659476	-0.801967	-0.867946	-0.568882	0.279692	0.696815	0.669536	0.510223	0.561585	Acetyl-coA synthetase isoform; along with Acs2p, acetyl-coA synthetase isoform is the nuclear source of acetyl-coA for histone acetylation; expressed during growth on nonfermentable carbon sources and under aerobic conditions	NA	chromatin organization_cofactor metabolic process_generation of precursor metabolites and energy_histone modification_monocarboxylic acid metabolic process_peptidyl-amino acid modification_protein acylation	NA	NA	DNA	other	9	515
YJR109C	CPA2	-0.154395	0.481895	0.652448	0.448143	0.180843	1.67698	0.25915	0.147662	0.407708	0.242488	Large subunit of carbamoyl phosphate synthetase; carbamoyl phosphate synthetase catalyzes a step in the synthesis of citrulline, an arginine precursor	carbamoyl-phosphate synthase complex	cellular amino acid metabolic process	NA	NA	metabolism	other	9	516
YOR303W	CPA1	-0.458905	0.143388	-0.467931	-0.53023	-0.524314	1.47085	0.599701	0.914302	1.0093	0.616827	Small subunit of carbamoyl phosphate synthetase; carbamoyl phosphate synthetase catalyzes a step in the synthesis of citrulline, an arginine precursor; translationally regulated by an attenuator peptide encoded by YOR302W within the CPA1 mRNA 5'-leader	carbamoyl-phosphate synthase complex	cellular amino acid metabolic process	NA	NA	metabolism	other	9	517
YGR192C	TDH3	3.69546	4.44122	4.14867	3.89682	2.8372	0.469097	0.322416	0.387095	0.593167	0.772115	Glyceraldehyde-3-phosphate dehydrogenase (GAPDH), isozyme 3; involved in glycolysis and gluconeogenesis; tetramer that catalyzes the reaction of glyceraldehyde-3-phosphate to 1,3 bis-phosphoglycerate; detected in the cytoplasm and cell wall; GAPDH-derived antimicrobial peptides secreted by S. cerevisiae are active against a wide variety of wine-related yeasts and bacteria; binds AU-rich RNA	NA	carbohydrate metabolic process_cofactor metabolic process_generation of precursor metabolites and energy_monocarboxylic acid metabolic process_nucleobase-containing small molecule metabolic process	NA	NA	metabolism	other	9	518
YJR009C	TDH2	2.59912	3.8491	3.74747	3.43662	1.88754	0.5516	0.69452	0.541409	0.781307	0.555241	Glyceraldehyde-3-phosphate dehydrogenase (GAPDH), isozyme 2; involved in glycolysis and gluconeogenesis; tetramer that catalyzes reaction of glyceraldehyde-3-phosphate to 1,3 bis-phosphoglycerate; detected in cytoplasm and cell wall; protein abundance increases in response to DNA replication stress; GAPDH-derived antimicrobial peptides are active against a wide variety of wine-related yeasts and …	NA	carbohydrate metabolic process_cofactor metabolic process_generation of precursor metabolites and energy_monocarboxylic acid metabolic process_nucleobase-containing small molecule metabolic process	NA	NA	metabolism	other	9	519
YJL052W	TDH1	-0.0463345	0.976922	0.577562	0.546227	0.138792	0.634536	0.0955717	0.258106	0.103924	0.356612	Glyceraldehyde-3-phosphate dehydrogenase (GAPDH), isozyme 1; involved in glycolysis and gluconeogenesis; tetramer that catalyzes the reaction of glyceraldehyde-3-phosphate to 1,3 bis-phosphoglycerate; detected in the cytoplasm and cell wall; protein abundance increases in response to DNA replication stress; GAPDH-derived antimicrobial peptides secreted by S. cerevisiae are active against a wide v…	NA	carbohydrate metabolic process_cofactor metabolic process_generation of precursor metabolites and energy_monocarboxylic acid metabolic process_nucleobase-containing small molecule metabolic process	NA	NA	metabolism	other	9	520
YMR205C	PFK2	-0.777033	0.585401	0.376524	-0.325673	0.0430356	NA	NA	NA	NA	NA	Beta subunit of heterooctameric phosphofructokinase; involved in glycolysis; indispensable for anaerobic growth; activated by fructose-2,6-bisphosphate and AMP; mutation inhibits glucose induction of cell cycle-related genes	6-phosphofructokinase complex	carbohydrate metabolic process_cellular ion homeostasis_cofactor metabolic process_generation of precursor metabolites and energy_ion transport_monocarboxylic acid metabolic process_nucleobase-containing small molecule metabolic process_protein complex biogenesis	NA	NA	metabolism	other	0	521
YNR012W	URK1	-1.0818	-0.616489	-0.496063	-0.859584	0.421547	0.0525729	0.575824	0.336497	0.595938	0.140735	Uridine/cytidine kinase; component of the pyrimidine ribonucleotide salvage pathway that converts uridine into UMP and cytidine into CMP; involved in the pyrimidine deoxyribonucleotide salvage pathway, converting deoxycytidine into dCMP	NA	other	NA	NA	other	other	0	522
YDR071C	PAA1	-0.0528256	0.214698	0.0895174	0.242715	0.27872	0.396885	0.188656	0.37579	0.166836	0.722712	Polyamine acetyltransferase; acetylates polyamines (e.g. putrescine, spermidine, spermine) and also aralkylamines (e.g. tryptamine, phenylethylamine); may be involved in transcription and/or DNA replication	NA	chromatin organization	NA	NA	DNA	other	0	523
YML060W	OGG1	0.293	0.18006	0.0683408	0.420888	0.176638	0.381631	0.362097	0.14674	0.2851	0.27279	Nuclear and mitochondrial glycosylase/lyase; specifically excises 7,8-dihydro-8-oxoguanine residues located opposite cytosine or thymine residues in DNA, repairs oxidative damage to mitochondrial DNA, contributes to UVA resistance	NA	DNA repair_cellular response to DNA damage stimulus_telomere organization	NA	NA	DNA	other	0	524
YLR285W	NNT1	0.545864	-0.481104	-0.106923	-0.346871	-0.127029	NA	NA	NA	NA	NA	S-adenosylmethionine-dependent methyltransferase; novel N-terminal protein methyltransferase that trimethylates the N-terminal glycine residue (G2) and also dimethylates lysine (K3) on elongation factor eEF1A (Tef1p/Tef2p); has a role in rDNA silencing and in lifespan determination	NA	chromatin organization_peptidyl-amino acid modification_protein alkylation	NA	NA	DNA	other	0	525
YDR296W	MHR1	-0.556394	-0.472662	-0.392244	-0.360405	-0.723553	1.30635	0.24519	0.214028	0.237079	0.346087	Mitochondrial ribosomal protein of the large subunit; also involved in homologous recombination in mitochondria; required for recombination-dependent mtDNA partitioning; involved in stimulation of mitochondrial DNA replication in response to oxidative stress	NA	DNA recombination_DNA replication_mitochondrial translation_mitochondrion organization_regulation of DNA metabolic process_regulation of organelle organization_response to chemical_response to oxidative stress	NA	NA	DNA	other	0	526
YIL128W	MET18	-0.261204	-0.443132	-0.16462	-0.315421	-0.247727	0.836351	0.2582	0.180998	0.090733	0.337995	Component of cytosolic iron-sulfur protein assembly (CIA) machinery; acts at a late step of Fe-S cluster assembly; forms the CIA targeting complex with Cia1p and Cia2p that directs Fe-S cluster incorporation into a subset of proteins involved in methionine biosynthesis, DNA replication and repair, transcription, and telomere maintenance; ortholog of human MMS19	NA	protein maturation	NA	yetfasco	other	other	0	527
YDR034C	LYS14	3.26128	-0.195942	0.482018	-0.218885	2.21413	NA	1.84819	1.16786	NA	1.72408	Transcriptional activator involved in regulating lysine biosynthesis; involved in the regulation of genes of the lysine biosynthesis pathway; requires 2-aminoadipate semialdehyde as co-inducer	NA	cellular amino acid metabolic process_transcription from RNA polymerase II promoter	NA	yetfasco	DNA	other	0	528
YDR098C	GRX3	0.016576	-0.0726822	-0.0289724	0.0171953	-0.199057	0.431525	0.4291	0.455805	0.370055	0.583338	Glutathione-dependent oxidoreductase; hydroperoxide and superoxide-radical responsive; monothiol glutaredoxin subfamily member along with Grx4p and Grx5p; protects cells from oxidative damage; with Grx4p, binds to Aft1p in iron-replete conditions, promoting its dissociation from promoters; evidence exists indicating that the translation start site is not Met1 as currently annotated, but rather Me…	NA	cellular ion homeostasis_chromatin organization_cytoskeleton organization_histone modification_regulation of protein modification process_response to chemical_response to oxidative stress	NA	NA	DNA	other	0	529
YML080W	DUS1	0.347585	0.482861	-0.00441747	0.285029	0.13418	0.254893	0.188888	0.275289	0.142577	0.529007	Dihydrouridine synthase; member of a widespread family of conserved proteins including Smm1p, Dus3p, and Dus4p; modifies pre-tRNA(Phe) at U17	NA	RNA modification_tRNA processing	NA	NA	RNA	other	0	530
YLR134W	PDC5	4.49578	6.09294	5.82225	5.61736	4.16891	0.14811	0.175009	0.338371	0.262248	0.370177	Minor isoform of pyruvate decarboxylase; key enzyme in alcoholic fermentation, decarboxylates pyruvate to acetaldehyde, regulation is glucose- and ethanol-dependent, repressed by thiamine, involved in amino acid catabolism	NA	carbohydrate metabolic process_cellular amino acid metabolic process_cofactor metabolic process_generation of precursor metabolites and energy_monocarboxylic acid metabolic process_nucleobase-containing small molecule metabolic process	NA	NA	metabolism	other	9	531
YKL060C	FBA1	4.30763	5.54206	5.22514	5.14635	3.42247	0.0600295	0.274012	0.250124	0.428511	0.41704	Fructose 1,6-bisphosphate aldolase; required for glycolysis and gluconeogenesis; catalyzes conversion of fructose 1,6 bisphosphate to glyceraldehyde-3-P and dihydroxyacetone-P; locates to mitochondrial outer surface upon oxidative stress; N-terminally propionylated in vivo	NA	carbohydrate metabolic process_cofactor metabolic process_generation of precursor metabolites and energy_monocarboxylic acid metabolic process_nucleobase-containing small molecule metabolic process	NA	NA	metabolism	other	9	532
YPL061W	ALD6	3.83536	4.98297	4.51859	4.44573	2.96932	0.219283	0.106974	0.193732	0.0268801	0.447524	Cytosolic aldehyde dehydrogenase; activated by Mg2+ and utilizes NADP+ as the preferred coenzyme; required for conversion of acetaldehyde to acetate; constitutively expressed; locates to the mitochondrial outer surface upon oxidative stress	NA	cofactor metabolic process_monocarboxylic acid metabolic process_nucleobase-containing small molecule metabolic process_response to osmotic stress	NA	NA	metabolism	other	9	533
YAL038W	CDC19	3.2353	4.21268	3.86924	3.66677	2.40479	0.445968	0.253434	0.205949	0.369509	0.475105	Pyruvate kinase; functions as a homotetramer in glycolysis to convert phosphoenolpyruvate to pyruvate, the input for aerobic (TCA cycle) or anaerobic (glucose fermentation) respiration; regulated via allosteric activation by fructose bisphosphate; CDC19 has a paralog, PYK2, that arose from the whole genome duplication	NA	carbohydrate metabolic process_cofactor metabolic process_generation of precursor metabolites and energy_monocarboxylic acid metabolic process_nucleobase-containing small molecule metabolic process	NA	NA	metabolism	other	9	534
YHR183W	GND1	2.95876	3.96815	3.68646	3.55095	1.98628	0.259935	0.232187	0.0574889	0.179673	0.38706	6-phosphogluconate dehydrogenase (decarboxylating); catalyzes an NADPH regenerating reaction in the pentose phosphate pathway; required for growth on D-glucono-delta-lactone and adaptation to oxidative stress; GND1 has a paralog, GND2, that arose from the whole genome duplication	NA	cofactor metabolic process_nucleobase-containing small molecule metabolic process_response to chemical_response to oxidative stress	NA	NA	metabolism	other	9	535
YDL055C	PSA1	2.47564	3.66364	3.38353	3.279	2.40833	0.738622	0.209879	0.126087	0.12015	0.245274	GDP-mannose pyrophosphorylase (mannose-1-phosphate guanyltransferase); synthesizes GDP-mannose from GTP and mannose-1-phosphate in cell wall biosynthesis; required for normal cell wall structure	NA	cell wall organization or biogenesis_protein glycosylation	NA	NA	other	other	9	536
YLR109W	AHP1	1.93224	2.85653	2.6614	2.38274	1.00933	0.495238	0.375653	0.315492	0.189495	0.404049	Thiol-specific peroxiredoxin; reduces hydroperoxides to protect against oxidative damage; function in vivo requires covalent conjugation to Urm1p	NA	response to chemical_response to oxidative stress	NA	NA	other	other	9	537
YCR012W	PGK1	2.67204	3.57023	3.2262	3.06501	1.81473	0.473762	0.152752	0.252408	0.189369	0.550095	3-phosphoglycerate kinase; catalyzes transfer of high-energy phosphoryl groups from the acyl phosphate of 1,3-bisphosphoglycerate to ADP to produce ATP; key enzyme in glycolysis and gluconeogenesis	NA	carbohydrate metabolic process_cofactor metabolic process_generation of precursor metabolites and energy_monocarboxylic acid metabolic process_nucleobase-containing small molecule metabolic process	NA	NA	metabolism	other	9	538
YEL046C	GLY1	1.98473	2.70781	2.43302	2.17043	1.13984	0.193466	0.262549	0.446988	0.489217	0.570377	Threonine aldolase; catalyzes the cleavage of L-allo-threonine and L-threonine to glycine; involved in glycine biosynthesis	NA	cellular amino acid metabolic process	NA	NA	metabolism	other	9	539
YML028W	TSA1	2.17607	2.99207	2.60755	2.29346	1.02414	0.114168	0.142918	0.18489	0.374761	0.576018	Thioredoxin peroxidase; acts as both ribosome-associated and free cytoplasmic antioxidant; self-associates to form high-molecular weight chaperone complex under oxidative stress; chaperone activity essential for growth in zinc deficiency; required for telomere length maintenance; protein abundance increases, forms cytoplasmic foci during DNA replication stress; TSA1 has a paralog, TSA2, that aros…	NA	carbohydrate metabolic process_cellular response to DNA damage stimulus_protein folding_regulation of cell cycle_response to chemical_response to oxidative stress	NA	NA	DNA	other	9	540
YPR074C	TKL1	2.14517	2.67574	2.22202	2.02092	0.422995	0.317979	0.262453	0.266378	0.40439	0.452267	Transketolase; catalyzes conversion of xylulose-5-phosphate and ribose-5-phosphate to sedoheptulose-7-phosphate and glyceraldehyde-3-phosphate in the pentose phosphate pathway; needed for synthesis of aromatic amino acids; TKL1 has a paralog, TKL2, that arose from the whole genome duplication	NA	cofactor metabolic process_nucleobase-containing small molecule metabolic process	NA	NA	metabolism	other	9	541
YDL182W	LYS20	2.00813	2.41728	1.92775	1.97147	0.355148	NA	NA	NA	NA	NA	Homocitrate synthase isozyme and functions in DNA repair; catalyzes the condensation of acetyl-CoA and alpha-ketoglutarate to form homocitrate, which is the first step in the lysine biosynthesis pathway; LYS20 has a paralog, LYS21, that arose from the whole genome duplication	NA	DNA repair_cellular amino acid metabolic process_cellular response to DNA damage stimulus_chromatin organization	NA	NA	DNA	other	9	542
YGL253W	HXK2	1.61185	2.45068	2.25768	1.90236	0.566377	0.305265	0.222621	0.217484	0.0981059	0.193167	Hexokinase isoenzyme 2; catalyzes phosphorylation of glucose in the cytosol; predominant hexokinase during growth on glucose; functions in the nucleus to repress expression of HXK1 and GLK1 and to induce expression of its own gene; antiapoptotic; phosphorylation/dephosphorylation at serine-14 by protein kinase Snf1p and protein phosphatase Glc7p-Reg1p regulates nucleocytoplasmic shuttling of Hxk2…	NA	carbohydrate metabolic process_carbohydrate transport_cofactor metabolic process_generation of precursor metabolites and energy_monocarboxylic acid metabolic process_nucleobase-containing small molecule metabolic process	NA	NA	metabolism	other	9	543
YDR353W	TRR1	1.33224	2.66898	2.2527	2.05581	0.55164	0.712457	0.138161	0.0966795	0.152383	0.591859	Cytoplasmic thioredoxin reductase; key regulatory enzyme that determines the redox state of the thioredoxin system, which acts as a disulfide reductase system and protects cells against both oxidative and reductive stress; protein abundance increases in response to DNA replication stress; TRR1 has a paralog, TRR2, that arose from the whole genome duplication	NA	response to chemical_response to oxidative stress	NA	NA	other	other	9	544
YNR050C	LYS9	1.65321	2.64697	2.38586	2.24534	0.941515	0.594821	0.170482	0.126759	0.0815023	0.176857	Saccharopine dehydrogenase (NADP+, L-glutamate-forming); catalyzes the formation of saccharopine from alpha-aminoadipate 6-semialdehyde, the seventh step in lysine biosynthesis pathway; exhibits genetic and physical interactions with TRM112	NA	cellular amino acid metabolic process	NA	NA	metabolism	other	9	545
YNL063W	MTQ1	0.854933	2.27908	1.81517	1.49623	0.160861	0.606398	0.436842	0.382388	0.680907	0.392998	S-adenosylmethionine-dependent methyltransferase; methylates translational release factor Mrf1p; similar to E.coli PrmC; is not an essential gene	NA	regulation of translation_translational elongation	NA	NA	other	other	9	546
YOR375C	GDH1	0.586439	2.08323	1.93733	1.91331	0.769113	0.594381	0.152883	0.134289	0.171085	0.166202	NADP(+)-dependent glutamate dehydrogenase; synthesizes glutamate from ammonia and alpha-ketoglutarate; rate of alpha-ketoglutarate utilization differs from Gdh3p; expression regulated by nitrogen and carbon sources; GDH1 has a paralog, GDH3, that arose from the whole genome duplication	NA	cellular amino acid metabolic process	NA	NA	metabolism	other	9	547
YIL053W	RHR2	1.2577	2.3345	1.95009	1.78178	0.368138	0.471309	0.255453	0.250765	0.152305	0.453571	Constitutively expressed DL-glycerol-3-phosphate phosphatase; also known as glycerol-1-phosphatase; involved in glycerol biosynthesis, induced in response to both anaerobic and osmotic stress; GPP1 has a paralog, GPP2, that arose from the whole genome duplication	NA	carbohydrate metabolic process_response to osmotic stress	NA	NA	metabolism	other	9	548
YKL216W	URA1	0.892829	1.7951	1.60531	1.39438	-0.00203353	0.722165	0.0873804	0.169927	0.201273	0.256971	Dihydroorotate dehydrogenase; catalyzes the fourth enzymatic step in the de novo biosynthesis of pyrimidines, converting dihydroorotic acid into orotic acid	NA	nucleobase-containing small molecule metabolic process	NA	NA	metabolism	other	9	549
YPL028W	ERG10	0.861693	1.80497	1.58832	1.60262	0.891992	0.300257	0.203345	0.324416	0.0583147	0.504249	Acetyl-CoA C-acetyltransferase (acetoacetyl-CoA thiolase); cytosolic enzyme that transfers an acetyl group from one acetyl-CoA molecule to another, forming acetoacetyl-CoA; involved in the first step in mevalonate biosynthesis; human ACAT1 functionally complements the growth defect caused by repression of ERG10 expression	NA	lipid metabolic process	NA	NA	metabolism	other	9	550
YIR034C	LYS1	0.967893	1.18827	1.39386	0.856864	0.548836	1.0974	1.12212	0.698507	1.11654	0.432573	Saccharopine dehydrogenase (NAD+, L-lysine-forming); catalyzes the conversion of saccharopine to L-lysine, which is the final step in the lysine biosynthesis pathway; also has mRNA binding activity	NA	cellular amino acid metabolic process	NA	NA	metabolism	other	9	551
YER091C	MET6	1.41666	1.99276	1.68332	1.55236	0.748388	0.789989	0.0629076	0.0772857	0.310037	0.310298	Cobalamin-independent methionine synthase; involved in methionine biosynthesis and regeneration; requires a minimum of two glutamates on the methyltetrahydrofolate substrate, similar to bacterial metE homologs	NA	cellular amino acid metabolic process	NA	NA	metabolism	other	9	552
YLR180W	SAM1	0.982064	2.14171	1.76557	1.69997	1.01605	0.88545	0.145207	0.137995	0.272266	0.121575	S-adenosylmethionine synthetase; catalyzes transfer of the adenosyl group of ATP to the sulfur atom of methionine; SAM1 has a paralog, SAM2, that arose from the whole genome duplication	NA	cellular amino acid metabolic process_cofactor metabolic process	NA	NA	metabolism	other	9	553
YBR011C	IPP1	1.45272	2.02612	1.75135	1.56396	0.709799	0.422108	0.0522962	0.120013	0.14578	0.394229	Cytoplasmic inorganic pyrophosphatase (PPase); homodimer that catalyzes the rapid exchange of oxygens from Pi with water, highly expressed and essential for viability, active-site residues show identity to those from E. coli PPase	NA	other	NA	NA	other	other	9	554
YLR354C	TAL1	0.609793	1.9663	1.65979	1.32851	0.0296173	1.05788	0.313511	0.328434	0.399577	1.23137	Transaldolase, enzyme in the non-oxidative pentose phosphate pathway; converts sedoheptulose 7-phosphate and glyceraldehyde 3-phosphate to erythrose 4-phosphate and fructose 6-phosphate; TAL1 has a paralog, NQM1, that arose from the whole genome duplication	NA	cofactor metabolic process_nucleobase-containing small molecule metabolic process	NA	NA	metabolism	other	9	555
YML126C	ERG13	0.739798	1.83802	1.61077	1.63915	0.63935	0.328146	0.086191	0.143118	0.0894051	0.137523	3-hydroxy-3-methylglutaryl-CoA (HMG-CoA) synthase; catalyzes the formation of HMG-CoA from acetyl-CoA and acetoacetyl-CoA; involved in the second step in mevalonate biosynthesis	NA	lipid metabolic process	NA	NA	metabolism	other	9	556
YJR104C	SOD1	1.01649	1.57441	1.21628	1.08283	0.205386	0.40472	0.24536	0.306807	0.388708	0.411433	Cytosolic copper-zinc superoxide dismutase; detoxifies superoxide; stabilizes Yck1p and Yck2p kinases in glucose to repress respiration; phosphorylated by Dun1p, enters nucleus under oxidative stress to promote transcription of stress response genes; human ortholog SOD1 implicated in ALS and complements yeast null; abundance increases under DNA replication stress and during exposure to boric acid…	Sod1p/Ccs1p complex	cell wall organization or biogenesis_cellular ion homeostasis_cellular respiration_generation of precursor metabolites and energy_response to chemical_response to oxidative stress_transcription from RNA polymerase II promoter	NA	NA	DNA	other	9	557
YGR254W	ENO1	-0.247358	1.83648	1.86586	1.71586	0.795457	0.268035	0.549497	0.429098	0.547777	0.331756	Enolase I, a phosphopyruvate hydratase; catalyzes conversion of 2-phosphoglycerate to phosphoenolpyruvate during glycolysis and the reverse reaction during gluconeogenesis; expression repressed in response to glucose; protein abundance increases in response to DNA replication stress; N-terminally propionylated in vivo; ENO1 has a paralog, ENO2, that arose from the whole genome duplication	NA	carbohydrate metabolic process_cofactor metabolic process_generation of precursor metabolites and energy_membrane fusion_monocarboxylic acid metabolic process_nucleobase-containing small molecule metabolic process_organelle fusion_regulation of organelle organization_vacuole organization	NA	NA	metabolism	other	9	558
YBL024W	NCL1	1.27142	1.83022	1.70316	1.63483	0.454966	0.238645	0.173496	0.267334	0.480254	0.629718	S-adenosyl-L-methionine-dependent tRNA: m5C-methyltransferase; methylates cytosine to m5C at several positions in tRNAs and intron-containing pre-tRNAs; increases proportion of tRNALeu(CAA) with m5C at wobble position in response to hydrogen peroxide, causing selective translation of mRNA from genes enriched in TTG codon; loss of NCL1 confers hypersensitivity to oxidative stress; similar to Nop2p…	NA	RNA modification_response to chemical_response to oxidative stress_tRNA processing	NA	NA	RNA	other	9	559
YLR058C	SHM2	1.15692	1.42194	1.50089	1.32084	0.649601	0.420523	0.146979	0.228651	0.309071	0.862059	Cytosolic serine hydroxymethyltransferase; converts serine to glycine plus 5,10 methylenetetrahydrofolate; major isoform involved in generating precursors for purine, pyrimidine, amino acid, and lipid biosynthesis	NA	other	NA	NA	other	other	9	560
YDR399W	HPT1	0.875612	1.27769	1.07608	0.876135	0.47102	NA	0.352588	0.0625256	0.162139	0.582707	Dimeric hypoxanthine-guanine phosphoribosyltransferase; catalyzes the transfer of the phosphoribosyl portion of 5-phosphoribosyl-alpha-1-pyrophosphate to a purine base (either guanine or hypoxanthine) to form pyrophosphate and a purine nucleotide (either guanosine monophosphate or inosine monophosphate); mutations in the human homolog HPRT1 can cause Lesch-Nyhan syndrome and Kelley-Seegmiller syn…	NA	nucleobase-containing small molecule metabolic process	NA	NA	metabolism	other	9	561
YGL009C	LEU1	0.414335	1.25472	1.1419	1.20577	0.500014	0.584886	0.133169	0.140844	0.312022	0.242973	Isopropylmalate isomerase; catalyzes the second step in the leucine biosynthesis pathway	NA	cellular amino acid metabolic process	NA	NA	metabolism	other	9	562
YDR158W	HOM2	0.193524	0.989386	0.347782	0.198615	-0.0278314	0.854026	0.310556	0.718552	0.149894	0.0756319	Aspartic beta semi-aldehyde dehydrogenase; catalyzes the second step in the common pathway for methionine and threonine biosynthesis; expression regulated by Gcn4p and the general control of amino acid synthesis	NA	cellular amino acid metabolic process	NA	NA	metabolism	other	9	563
YAL012W	CYS3	0.525943	1.02928	0.738793	0.50396	-0.220483	0.425709	0.141281	0.159948	0.334078	0.234034	Cystathionine gamma-lyase; catalyzes one of the two reactions involved in the transsulfuration pathway that yields cysteine from homocysteine with the intermediary formation of cystathionine; protein abundance increases in response to DNA replication stress	NA	cellular amino acid metabolic process	NA	NA	metabolism	other	9	564
YGR061C	ADE6	0.105687	1.15714	1.25464	1.0418	0.112428	0.219051	0.155467	0.0831577	0.164205	0.275502	Formylglycinamidine-ribonucleotide (FGAM)-synthetase; catalyzes a step in the 'de novo' purine nucleotide biosynthetic pathway	NA	nucleobase-containing small molecule metabolic process	NA	NA	metabolism	other	9	565
YGR204W	ADE3	0.606183	1.1706	0.854742	0.960428	0.186563	0.383529	0.16794	0.0742106	0.0910191	0.342054	Cytoplasmic trifunctional enzyme C1-tetrahydrofolate synthase; involved in single carbon metabolism and required for biosynthesis of purines, thymidylate, methionine, and histidine; null mutation causes auxotrophy for adenine and histidine	NA	cofactor metabolic process_nucleobase-containing small molecule metabolic process	NA	NA	metabolism	other	9	566
YDL131W	LYS21	0.964768	1.56257	1.45467	1.42997	1.02152	0.463275	0.231954	0.222261	0.0873154	0.247382	Homocitrate synthase isozyme; catalyzes the condensation of acetyl-CoA and alpha-ketoglutarate to form homocitrate, which is the first step in the lysine biosynthesis pathway; LYS21 has a paralog, LYS20, that arose from the whole genome duplication	NA	cellular amino acid metabolic process	NA	NA	metabolism	other	9	567
YGR124W	ASN2	0.88947	1.24362	1.09309	0.76862	0.393735	0.909192	0.251887	0.391301	0.140869	0.188105	Asparagine synthetase; catalyzes the synthesis of L-asparagine from L-aspartate in the asparagine biosynthetic pathway; ASN2 has a paralog, ASN1, that arose from the whole genome duplication	NA	cellular amino acid metabolic process_monocarboxylic acid metabolic process	NA	NA	metabolism	other	9	568
YDR502C	SAM2	0.530342	1.28607	0.989395	1.1153	0.61994	0.568386	0.235563	0.0864946	0.163425	0.175339	S-adenosylmethionine synthetase; catalyzes transfer of the adenosyl group of ATP to the sulfur atom of methionine; comparative analysis suggests that a mitochondrially targeted form may result from translation starting at a non-canonical codon upstream of the annotated start codon	NA	cellular amino acid metabolic process_cofactor metabolic process	NA	NA	metabolism	other	9	569
YKL035W	UGP1	0.0647931	1.36082	1.04139	0.979705	0.55156	0.534678	0.162064	0.129168	0.227	0.264819	UDP-glucose pyrophosphorylase (UGPase); catalyses the reversible formation of UDP-Glc from glucose 1-phosphate and UTP, involved in a wide variety of metabolic pathways, expression modulated by Pho85p through Pho4p; involved in PKA-mediated oxidative stress resistance and long-term survival in stationary phase; UGP1 has a paralog, YHL012W, that arose from the whole genome duplication	NA	carbohydrate metabolic process_generation of precursor metabolites and energy_oligosaccharide metabolic process	NA	NA	metabolism	other	9	570
YOL058W	ARG1	0.981123	1.09532	1.41201	1.43758	0.743737	0.131298	0.0764955	0.324099	0.416558	0.0410456	Arginosuccinate synthetase; catalyzes the formation of L-argininosuccinate from citrulline and L-aspartate in the arginine biosynthesis pathway; potential Cdc28p substrate	NA	cellular amino acid metabolic process	NA	NA	metabolism	other	9	571
YJL130C	URA2	-0.589545	1.31111	0.745656	0.64432	0.563373	0.816564	0.275259	0.122358	0.291883	0.267898	Bifunctional carbamoylphosphate synthetase/aspartate transcarbamylase; catalyzes the first two enzymatic steps in the de novo biosynthesis of pyrimidines; both activities are subject to feedback inhibition by UTP	NA	cellular amino acid metabolic process_nucleobase-containing small molecule metabolic process	NA	NA	metabolism	other	9	572
YMR120C	ADE17	-0.00453324	1.20222	0.887553	0.81773	0.918364	0.482754	0.259973	0.0971654	0.117701	0.0784587	Enzyme of 'de novo' purine biosynthesis; contains both 5-aminoimidazole-4-carboxamide ribonucleotide transformylase and inosine monophosphate cyclohydrolase activities; ADE17 has a paralog, ADE16, that arose from the whole genome duplication; ade16 ade17 mutants require adenine and histidine	NA	nucleobase-containing small molecule metabolic process	NA	NA	metabolism	other	9	573
YMR318C	ADH6	-0.52261	0.278769	0.246271	0.181811	-0.298373	0.368819	0.636836	0.27985	0.957239	0.747382	NADPH-dependent medium chain alcohol dehydrogenase; has broad substrate specificity; member of the cinnamyl family of alcohol dehydrogenases; may be involved in fusel alcohol synthesis or in aldehyde tolerance; protein abundance increases in response to DNA replication stress	NA	other	NA	NA	other	other	9	574
YMR228W	MTF1	1.6096	1.35292	0.899543	0.934169	0.25652	0.538345	0.0184576	0.200936	0.296091	0.676342	Mitochondrial RNA polymerase specificity factor; has structural similarity to S-adenosylmethionine-dependent methyltransferases and functional similarity to bacterial sigma-factors; Mtf1p interacts with and stabilizes the Rpo41p-promoter complex, enhancing DNA bending and melting to facilitate pre-initiation open complex formation	NA	DNA-templated transcription, initiation_mitochondrion organization	NA	NA	DNA	other	9	575
YDR226W	ADK1	0.816954	0.614612	0.619797	0.610476	0.3297	0.598246	0.123816	0.166276	0.13585	0.480129	Adenylate kinase, required for purine metabolism; localized to the cytoplasm and the mitochondria; lacks cleavable signal sequence; protein abundance increases in response to DNA replication stress; mutations affecting Adk1p catalytic activity deregulate expression of phosphate utilization genes PHO5 and PHO84; human homolog AK1 can complement yeast adk1 mutant	NA	DNA replication_nucleobase-containing small molecule metabolic process	NA	NA	DNA	other	9	576
YLR027C	AAT2	0.385191	0.988009	0.833763	0.704136	-0.3024	0.500411	0.200192	0.0743092	0.273894	0.200036	Cytosolic aspartate aminotransferase involved in nitrogen metabolism; localizes to peroxisomes in oleate-grown cells	NA	cellular amino acid metabolic process_monocarboxylic acid metabolic process	NA	NA	metabolism	other	9	577
YBR115C	LYS2	0.12979	0.500475	0.223954	0.269473	-0.563785	0.595084	0.0897041	0.120556	0.45853	0.846707	Alpha aminoadipate reductase; catalyzes the reduction of alpha-aminoadipate to alpha-aminoadipate 6-semialdehyde, which is the fifth step in biosynthesis of lysine; activation requires posttranslational phosphopantetheinylation by Lys5p	NA	cellular amino acid metabolic process	NA	NA	metabolism	other	9	578
YHR216W	IMD2	-0.816009	0.228659	0.0897955	-0.163826	-0.610428	1.05801	0.973847	0.645596	0.977503	0.874709	Inosine monophosphate dehydrogenase; catalyzes the rate-limiting step in GTP biosynthesis, expression is induced by mycophenolic acid resulting in resistance to the drug, expression is repressed by nutrient limitation; IMD2 has a paralog, YAR073W/YAR075W, that arose from a segmental duplication	NA	nucleobase-containing small molecule metabolic process	NA	NA	metabolism	other	9	579
YGR234W	YHB1	0.725971	0.5383	0.637781	0.562632	0.0666813	0.147841	0.165342	0.244601	0.0776654	0.0446597	Nitric oxide oxidoreductase; flavohemoglobin involved in nitric oxide detoxification; plays a role in the oxidative and nitrosative stress responses; protein increases in abundance and relocalizes from nucleus to cytoplasmic foci upon DNA replication stress	NA	response to chemical_response to oxidative stress	NA	NA	other	other	9	580
YNL220W	ADE12	-0.646103	0.815731	0.751835	0.696063	0.34448	1.1822	0.237339	0.315945	0.268487	0.0803232	Adenylosuccinate synthase; catalyzes the first step in synthesis of adenosine monophosphate from inosine 5'monophosphate during purine nucleotide biosynthesis; exhibits binding to single-stranded autonomously replicating (ARS) core sequence	NA	nucleobase-containing small molecule metabolic process	NA	NA	metabolism	other	9	581
YOR209C	NPT1	0.0608199	0.423768	0.211236	0.229655	0.219868	0.298937	0.188017	0.411225	0.109764	0.131545	Nicotinate phosphoribosyltransferase; acts in the salvage pathway of NAD+ biosynthesis; required for silencing at rDNA and telomeres and has a role in silencing at mating-type loci; localized to the nucleus	NA	chromatin organization_cofactor metabolic process_nucleobase-containing small molecule metabolic process	NA	NA	DNA	other	9	582
YGR209C	TRX2	-0.0865944	0.447502	0.371444	0.0844429	-0.505093	0.465367	0.289113	0.441832	0.358819	0.0940805	Cytoplasmic thioredoxin isoenzyme; part of thioredoxin system which protects cells against oxidative and reductive stress; forms LMA1 complex with Pbi2p; acts as a cofactor for Tsa1p; required for ER-Golgi transport and vacuole inheritance; with Trx1p, facilitates mitochondrial import of small Tims Tim9p, Tim10p, Tim13p by maintaining them in reduced form; abundance increases under DNA replicatio…	NA	Golgi vesicle transport_membrane fusion_organelle fusion_organelle inheritance_vacuole organization	NA	NA	other	other	9	583
YEL071W	DLD3	0.171371	0.862595	0.71328	0.617149	0.145612	NA	NA	NA	NA	NA	2-hydroxyglutarate transhydrogenase, and minor D-lactate dehydrogenase; converts D-2-hydroxyglutarate (D-2HG), an oncometabolite, to alpha-ketoglutarate in the presence of FAD, with concomitant reduction of pyruvate to D-lactate; minor lactate dehydrogenase activity; component of the retrograde regulon that consists of genes whose expression are stimulated by damage to mitochondria and reduced in…	NA	monocarboxylic acid metabolic process	NA	NA	metabolism	other	9	584
YKL067W	YNK1	-0.084968	-0.0389546	0.235568	0.133685	-0.400066	0.583743	0.229979	0.176507	0.109967	0.43348	Nucleoside diphosphate kinase; catalyzes the transfer of gamma phosphates from nucleoside triphosphates, usually ATP, to nucleoside diphosphates by a mechanism that involves formation of an autophosphorylated enzyme intermediate; protein abundance increases in response to DNA replication stress	NA	cellular response to DNA damage stimulus_nucleobase-containing small molecule metabolic process	NA	NA	DNA	other	9	585
YCL040W	GLK1	-0.78437	-0.0370911	-0.255338	-0.0440712	-0.526783	1.38071	0.453982	0.189526	0.177299	0.400776	Glucokinase; catalyzes the phosphorylation of glucose at C6 in the first irreversible step of glucose metabolism; one of three glucose phosphorylating enzymes; expression regulated by non-fermentable carbon sources; GLK1 has a paralog, EMI2, that arose from the whole genome duplication	NA	carbohydrate metabolic process_carbohydrate transport_cofactor metabolic process_generation of precursor metabolites and energy_monocarboxylic acid metabolic process_nucleobase-containing small molecule metabolic process	NA	NA	metabolism	other	9	586
YGL037C	PNC1	-0.294849	-0.197172	-0.224311	-0.234109	0.0497713	0.965675	0.5159	0.433604	0.251348	0.390214	Nicotinamidase that converts nicotinamide to nicotinic acid; part of the NAD(+) salvage pathway; required for life span extension by calorie restriction; lacks a peroxisomal targeting signal but is imported into peroxisomes via binding to Gpd1p; PNC1 expression responds to all known stimuli that extend replicative life span; protein increases in abundance and relative distribution to cytoplasmic …	NA	chromatin organization_cofactor metabolic process_nucleobase-containing small molecule metabolic process_regulation of DNA metabolic process	NA	NA	DNA	other	9	587
YHR167W	THP2	0.33704	-0.682748	-0.00707429	-0.125953	0.363238	0.210044	0.47848	0.215622	0.369571	0.758998	Subunit of the THO and TREX complexes; THO connects transcription elongation and mitotic recombination, and TREX is recruited to activated genes and couples transcription to mRNA export; involved in telomere maintenance	THO complex	DNA recombination_DNA-templated transcription, elongation_nuclear transport_nucleobase-containing compound transport_telomere organization_transcription from RNA polymerase II promoter	NA	NA	DNA	CPA/termination	0	588
YML062C	MFT1	-0.924334	-0.320927	-0.157574	-0.0458371	0.0284445	1.4938	0.43471	0.302784	0.56422	0.341478	Subunit of the THO complex; THO is a nuclear complex comprised of Hpr1p, Mft1p, Rlr1p, and Thp2p, that is involved in transcription elongation and mitotic recombination; involved in telomere maintenance	THO complex	DNA recombination_DNA-templated transcription, elongation_nuclear transport_nucleobase-containing compound transport_transcription from RNA polymerase II promoter	NA	NA	DNA	CPA/termination	0	589
YNL139C	THO2	-0.443156	-0.36298	-0.148292	-0.261269	-0.18814	0.817195	0.523837	0.410352	0.0720416	0.270856	Subunit of the THO complex; THO is required for efficient transcription elongation and involved in transcriptional elongation-associated recombination; required for LacZ RNA expression from certain plasmids	THO complex	DNA recombination_DNA repair_DNA-templated transcription, elongation_cellular response to DNA damage stimulus_mRNA processing_nuclear transport_nucleobase-containing compound transport_transcription from RNA polymerase I promoter_transcription from RNA polymerase II promoter	NA	yetfasco	RNA	CPA/termination	0	590
YDR138W	HPR1	-0.571011	0.163751	-0.114001	-0.139543	-0.23776	1.5295	0.14591	0.384706	0.647532	0.383542	Subunit of THO/TREX complexes; this complex couple transcription elongation with mitotic recombination and with mRNA metabolism and export, subunit of an RNA Pol II complex; regulates lifespan; involved in telomere maintenance; similar to Top1p	THO complex_Cdc73p/Paf1p complex	DNA recombination_DNA repair_DNA-templated transcription, elongation_cellular response to DNA damage stimulus_mRNA processing_nuclear transport_nucleobase-containing compound transport_transcription from RNA polymerase I promoter_transcription from RNA polymerase II promoter	NA	NA	RNA	CPA/termination	0	591
YGL173C	XRN1	-0.750196	-0.375875	-0.587553	-0.374606	-0.0496599	0.316146	0.222783	0.297986	0.297014	0.463374	Evolutionarily-conserved 5'-3' exonuclease; component of cytoplasmic processing (P) bodies involved in mRNA decay; also enters the nucleus and positively regulates transcription initiation and elongation; plays a role in microtubule-mediated processes, filamentous growth, ribosomal RNA maturation, and telomere maintenance; activated by the scavenger decapping enzyme Dcs1p	NA	DNA-templated transcription, elongation_DNA-templated transcription, initiation_RNA catabolic process_mitotic cell cycle_protein complex biogenesis_rRNA processing_regulation of cell cycle_snoRNA processing_transcription from RNA polymerase II promoter	NA	NA	RNA	other	0	592
YGL130W	CEG1	NA	NA	NA	NA	NA	NA	NA	NA	NA	NA	Guanylyltransferase involved in mRNA 5' capping; subunit of mRNA capping enzyme, which is a heterotetramer composed of two molecules of Ceg1p and a homodimer of Cet1p, the mRNA 5'-triphosphatase subunit; nuclear import of Ceg1p requires interaction with Cet1p; mammalian capping enzyme is a single bifunctional polypeptide; human homolog RNGTT can complement yeast ceg1 null mutant	mRNA guanylyl transferase (capping complex)	mRNA processing_tRNA processing_transcription from RNA polymerase II promoter	NA	NA	RNA	other	0	593
YPL228W	CET1	0.906617	1.05261	0.570313	0.597149	0.247709	0.840635	0.181085	0.178391	0.356796	0.80352	RNA 5'-triphosphatase involved in mRNA 5' capping; subunit of mRNA capping enzyme, which is a heterotetramer composed of a Cet1p homodimer and two molecules of guanylyltransferase Ceg1p; Cet1p also has a role in regulation of RNAPII pausing at promoter-proximal sites; interaction between Cet1p and Ceg1p is required for Ceg1p nuclear import; mammalian enzyme is single bifunctional polypeptide; hum…	mRNA guanylyl transferase (capping complex)	DNA-templated transcription, elongation_mRNA processing_transcription from RNA polymerase II promoter	NA	NA	RNA	other	0	594
YER029C	SMB1	0.118449	0.0833264	-0.094178	-0.0330203	-0.430723	NA	NA	NA	NA	NA	Core Sm protein Sm B; part of heteroheptameric complex (with Smd1p, Smd2p, Smd3p, Sme1p, Smx3p, and Smx2p) that is part of the spliceosomal U1, U2, U4, and U5 snRNPs; homolog of human Sm B and Sm B'	commitment complex_U5 snRNP complex_U4/U6 x U5 tri-snRNP complex_U2 snRNP complex_U1 snRNP complex	RNA splicing_mRNA processing	NA	NA	RNA	other	0	595
YIL061C	SNP1	-0.253177	-0.541323	-0.265941	-0.633572	-0.376745	0.638282	0.939691	0.601005	0.764585	0.862968	Component of U1 snRNP required for mRNA splicing via spliceosome; substrate of the arginine methyltransferase Hmt1p; may interact with poly(A) polymerase to regulate polyadenylation; homolog of human U1 70K protein; protein abundance increases in response to DNA replication stress	commitment complex_U1 snRNP complex	RNA splicing_mRNA processing	NA	NA	RNA	other	0	596
YLR116W	MSL5	0.0623801	0.336014	0.320475	0.0978585	-0.0472206	0.7921	0.455082	0.325413	0.381337	0.239794	Component of commitment complex; which defines first step in splicing pathway; essential protein that interacts with Mud2p and Prp40p, forming a bridge between the intron ends; also involved in nuclear retention of pre-mRNA; relocalizes to the cytosol in response to hypoxia	commitment complex	RNA splicing_mRNA processing	NA	NA	RNA	other	0	597
YGR013W	SNU71	-0.334538	-0.104457	-0.106605	-0.309264	-0.222031	1.20132	0.24984	0.728043	0.631099	0.943633	Component of U1 snRNP required for mRNA splicing via spliceosome; yeast specific, no metazoan counterpart	commitment complex_U1 snRNP complex	RNA splicing_mRNA processing	NA	NA	RNA	other	0	598
YPR182W	SMX3	-0.353677	-0.0588771	0.105597	-0.028272	0.507898	0.288986	0.0591119	0.572393	0.158903	0.536297	Core Sm protein Sm F; part of heteroheptameric complex (with Smb1p, Smd1p, Smd2p, Smd3p, Sme1p, and Smx2p) that is part of the spliceosomal U1, U2, U4, and U5 snRNPs; homolog of human Sm F	commitment complex_U5 snRNP complex_U4/U6 x U5 tri-snRNP complex_U2 snRNP complex_U1 snRNP complex	RNA splicing_mRNA processing	NA	NA	RNA	other	0	599
YLR275W	SMD2	0.408246	0.023608	0.111984	-0.145268	0.101676	0.481798	0.394259	0.33301	0.493617	0.366701	Core Sm protein Sm D2; part of heteroheptameric complex (with Smb1p, Smd1p, Smd3p, Sme1p, Smx3p, and Smx2p) that is part of the spliceosomal U1, U2, U4, and U5 snRNPs; homolog of human Sm D2	commitment complex_U5 snRNP complex_U4/U6 x U5 tri-snRNP complex_U2 snRNP complex_U1 snRNP complex	RNA splicing_mRNA processing	NA	NA	RNA	other	0	600
YDR240C	SNU56	-0.383702	-0.479137	-0.199018	-0.63822	-0.767348	0.591101	0.197786	0.12673	0.312041	0.454222	Component of U1 snRNP required for mRNA splicing via spliceosome; yeast specific, no metazoan counterpart; interacts with mRNA in commitment complex	commitment complex_U1 snRNP complex	RNA splicing_mRNA processing	NA	NA	RNA	other	0	601
YBR119W	MUD1	-0.0236325	-0.0740189	0.257781	0.0760026	-0.433988	0.702	0.348176	0.189798	0.37611	0.239159	U1 snRNP A protein; homolog of human U1-A; involved in nuclear mRNA splicing	commitment complex_U1 snRNP complex	RNA splicing_mRNA processing	NA	NA	RNA	other	0	602
YFL017W-A	SMX2	-1.17075	-0.120528	-0.110245	-0.00903074	-0.0768595	1.13459	0.143738	0.178753	0.255526	0.635742	Core Sm protein Sm G; part of heteroheptameric complex (with Smb1p, Smd1p, Smd2p, Smd3p, Sme1p, and Smx3p) that is part of the spliceosomal U1, U2, U4, and U5 snRNPs; homolog of human Sm G	commitment complex_U5 snRNP complex_U4/U6 x U5 tri-snRNP complex_U2 snRNP complex_U1 snRNP complex	RNA splicing_mRNA processing	NA	NA	RNA	other	0	603
YGR074W	SMD1	0.3145	-0.230317	0.114117	0.162446	-0.00300494	0.523205	0.325486	0.112868	0.0286238	0.549958	Core Sm protein Sm D1; part of heteroheptameric complex (with Smb1p, Smd2p, Smd3p, Sme1p, Smx3p, and Smx2p) that is part of the spliceosomal U1, U2, U4, and U5 snRNPs; relocalizes to the cytosol in response to hypoxia; homolog of human Sm D1; protein abundance increases in response to DNA replication stress	commitment complex_U5 snRNP complex_U4/U6 x U5 tri-snRNP complex_U2 snRNP complex_U1 snRNP complex	RNA splicing_mRNA processing	NA	NA	RNA	other	0	604
YKL074C	MUD2	0.441036	-0.398766	-0.22102	-0.436565	-0.766069	0.388997	0.192287	0.316836	0.211717	0.907389	Protein involved in early pre-mRNA splicing; component of the pre-mRNA-U1 snRNP complex, the commitment complex; interacts with Msl5p/BBP splicing factor and Sub2p; similar to metazoan splicing factor U2AF65	commitment complex	RNA splicing_mRNA processing	NA	NA	RNA	other	0	605
YDR432W	NPL3	1.96473	1.97526	1.43691	1.54769	1.06332	0.284814	0.245694	0.225932	0.0708479	0.295062	RNA-binding protein; promotes elongation, regulates termination, and carries poly(A) mRNA from nucleus to cytoplasm; represses translation initiation by binding eIF4G; required for pre-mRNA splicing; interacts with E3 ubiquitin ligase Bre1p, linking histone ubiquitination to mRNA processing; may have role in telomere maintenance; dissociation from mRNAs promoted by Mtr10p; phosphorylated by Sky1p…	NA	DNA-templated transcription, elongation_DNA-templated transcription, termination_RNA splicing_mRNA processing_nuclear transport_nucleobase-containing compound transport_regulation of translation_transcription from RNA polymerase II promoter	NA	NA	RNA	other	0	606
YMR125W	STO1	1.44345	1.67712	1.39965	1.40895	0.633567	0.282502	0.233112	0.375981	0.437069	0.315711	Large subunit of the nuclear mRNA cap-binding protein complex; interacts with Npl3p to carry nuclear poly(A)+ mRNA to cytoplasm; also involved in nuclear mRNA degradation and telomere maintenance; orthologous to mammalian CBP80	commitment complex	RNA catabolic process_RNA splicing_mRNA processing_response to osmotic stress	NA	NA	RNA	other	0	607
YPL178W	CBC2	0.734069	0.567402	0.275213	0.458216	-0.0647725	0.14243	0.876168	0.669189	0.769618	0.696425	Small subunit of the heterodimeric cap binding complex with Sto1p; interacts with Npl3p, possibly to package mRNA for export from the nucleus; may have a role in telomere maintenance; contains an RNA-binding motif	commitment complex	RNA splicing_mRNA processing	NA	NA	RNA	other	0	608
YDL160C	DHH1	0.0428023	0.278237	-0.374972	-0.434721	0.992483	1.82232	0.213563	0.0740721	0.460863	0.638364	Cytoplasmic DExD/H-box helicase, stimulates mRNA decapping; coordinates distinct steps in mRNA function and decay, interacts with both the decapping and deadenylase complexes, role in translational repression, mRNA decay, and processing body dynamics; may have a role in mRNA export; C-terminus of Dhh1p interacts with Ngr1p and promotes POR1, but not EDC1 mRNA decay; forms cytoplasmic foci upon DN…	NA	RNA catabolic process_organelle assembly_regulation of organelle organization_regulation of translation_translational elongation	NA	NA	RNA	other	0	609
YER035W	EDC2	-0.688492	-0.2927	-0.263616	0.0835031	-0.01227	1.11305	0.463478	0.0690958	0.260818	0.235105	RNA-binding protein that directly activates mRNA decapping; binds mRNA substrate and enhances activity of decapping proteins Dcp1p and Dcp2p; has a role in translation during heat stress; protein increases in abundance and relocalizes to nucleolus and to nuclear foci upon DNA replication stress; EDC2 has a paralog, EDC1, that arose from the whole genome duplication	NA	RNA catabolic process_regulation of translation	NA	NA	RNA	other	0	610
YNL118C	DCP2	-0.869377	-0.914363	-0.727283	-1.06301	-0.41907	0.377555	0.666863	0.797258	1.13565	0.175081	Catalytic subunit of Dcp1p-Dcp2p decapping enzyme complex; removes 5' cap structure from mRNAs prior to their degradation; also enters nucleus and positively regulates transcription initiation; nudix hydrolase family member; forms cytoplasmic foci upon DNA replication stress; human homolog DCP2 complements yeast dcp2 thermosensitive mutant	Decapping Enzyme Complex	DNA-templated transcription, initiation_RNA catabolic process_organelle assembly_protein complex biogenesis_transcription from RNA polymerase II promoter	NA	NA	RNA	other	0	611
YOL149W	DCP1	-0.293693	-0.800736	-0.393816	-0.213851	-0.272906	0.480967	0.32084	0.389633	0.460047	1.02302	Subunit of the Dcp1p-Dcp2p decapping enzyme complex; decapping complex removes the 5' cap structure from mRNAs prior to their degradation; enhances the activity of catalytic subunit Dcp2p; regulated by DEAD box protein Dhh1p; forms cytoplasmic foci upon DNA replication stress	Decapping Enzyme Complex	RNA catabolic process	NA	NA	RNA	other	0	612
YOR001W	RRP6	-0.483538	-0.0623759	-0.191837	-0.0325733	0.508813	1.16832	0.45584	0.342881	0.177687	0.337981	Nuclear exosome exonuclease component; has 3'-5' exonuclease activity that is regulated by Lrp1p; involved in RNA processing, maturation, surveillance, degradation, tethering, and export; role in sn/snoRNAs precursor degradation; forms a stable heterodimer with Lrp1p; has similarity to E. coli RNase D and to human PM-Sc1 100 (EXOSC10); mutant displays reduced transcription elongation in the G-les…	Nuclear exosome complex	RNA catabolic process_rRNA processing_snoRNA processing	NA	NA	RNA	other	0	613
YOL021C	DIS3	0.259825	0.0327912	0.118319	-0.126995	-0.0107512	0.671212	0.217447	0.338494	0.396279	0.962998	Exosome core complex catalytic subunit; has both endonuclease and 3'-5' exonuclease activity; involved in 3'-5' RNA processing and degradation in both the nucleus and the cytoplasm; role in degradation of tRNAs; similar to E. coli RNase R and to human DIS3, which partially complements dis3-81 heat sensitivity; mutations in Dis3p analogous to human mutations implicated in multiple myeloma impair e…	Nuclear exosome complex_Cytoplasmic exosome complex	RNA catabolic process_nuclear transport_nucleobase-containing compound transport_rRNA processing_snoRNA processing	NA	NA	RNA	other	0	614
YDL111C	RRP42	-0.540271	-0.301393	-0.128974	-0.123153	0.291403	0.0683407	0.309941	0.695076	0.397065	0.368517	Exosome non-catalytic core component; involved in 3'-5' RNA processing and degradation in both the nucleus and the cytoplasm; has similarity to E. coli RNase PH and to human hRrp42p (EXOSC7)	Nuclear exosome complex_Cytoplasmic exosome complex	RNA catabolic process_rRNA processing_snoRNA processing	NA	NA	RNA	other	0	615
YHR077C	NMD2	-0.48531	-0.502225	-0.479839	-0.417536	-0.823144	0.789368	0.178854	0.458208	0.538064	0.841141	Protein involved in the nonsense-mediated mRNA decay (NMD) pathway; interacts with Nam7p and Upf3p; involved in telomere maintenance	Nonsense-mediated mRNA decay pathway complex	DNA recombination_RNA catabolic process	NA	NA	RNA	other	0	616
YMR080C	NAM7	-1.40216	-0.550445	-0.562135	-0.384062	-0.501688	1.94281	0.443053	0.244364	0.200117	0.342549	ATP-dependent RNA helicase of the SFI superfamily; involved in nonsense mediated mRNA decay; required for efficient translation termination at nonsense codons and targeting of NMD substrates to P-bodies; binds to the small ribosomal subunit via an interaction with Rps26; forms cytoplasmic foci upon DNA replication stress	Nonsense-mediated mRNA decay pathway complex	DNA recombination_RNA catabolic process_chromatin organization_protein modification by small protein conjugation or removal_regulation of translation	NA	NA	RNA	other	0	617
YKL025C	PAN3	-0.194057	-0.430554	-0.118715	-0.114642	-0.320342	0.771785	0.497154	0.247445	0.474727	0.738206	Essential subunit of the Pan2p-Pan3p poly(A)-ribonuclease complex; poly (A) mRNA binding subunit which recruits mRNA to the complex; the Pan2p-Pan3p complex controls poly(A) tail length and regulates the stoichiometry and activity of postreplication repair complexes	PAN complex	DNA repair_RNA catabolic process_cellular response to DNA damage stimulus	NA	NA	RNA	other	0	618
YGL094C	PAN2	-0.590934	-0.443732	-0.398708	-0.407415	-0.1662	0.405334	0.0507783	0.439689	0.280986	0.356666	Catalytic subunit of the Pan2p-Pan3p poly(A)-ribonuclease complex; complex acts to control poly(A) tail length and regulate the stoichiometry and activity of postreplication repair complexes	PAN complex	DNA repair_RNA catabolic process_cellular response to DNA damage stimulus	NA	NA	RNA	other	0	619
YBL054W	TOD6	-0.967292	0.00880469	-0.0467674	0.0765526	0.162643	1.21169	0.0489185	0.307571	0.264893	0.269009	PAC motif binding protein involved in rRNA and ribosome biogenesis; subunit of the RPD3L histone deacetylase complex; Myb-like HTH transcription factor; hypophosphorylated by rapamycin treatment in a Sch9p-dependent manner; activated in stochastic pulses of nuclear localization	NA	transcription from RNA polymerase II promoter	NA	yetfasco	DNA	other	0	620
YHR085W	IPI1	-0.300238	0.180655	0.142494	-0.0308449	-0.174482	1.02355	0.132417	0.176449	0.11188	0.356256	Component of the Rix1 complex and possibly pre-replicative complexes; required for processing of ITS2 sequences from 35S pre-rRNA; component of the pre-60S ribosomal particle with the dynein-related AAA-type ATPase Mdn1p; required for pre-replicative complex (pre-RC) formation and maintenance during DNA replication licensing; relocalizes to the cytosol in response to hypoxia; essential gene	Rix1p complex	DNA replication_organelle assembly_rRNA processing_regulation of DNA metabolic process_ribosomal large subunit biogenesis_ribosome assembly	NA	NA	RNA	other	0	621
YHR197W	RIX1	0.0918504	0.592451	0.455137	0.299027	-0.079777	0.580876	0.068668	0.349682	0.0912682	0.359552	Component of the Rix1 complex and possibly pre-replicative complexes; required for processing of ITS2 sequences from 35S pre-rRNA; component of the pre-60S ribosomal particle with the dynein-related AAA-type ATPase Mdn1p; required for pre-replicative complex (pre-RC) formation and maintenance during DNA replication licensing; relocalizes to the cytosol in response to hypoxia; essential gene	Rix1p complex	DNA replication_nuclear transport_organelle assembly_rRNA processing_regulation of DNA metabolic process_ribosomal large subunit biogenesis_ribosomal subunit export from nucleus_ribosome assembly	NA	NA	RNA	other	0	622
YGL213C	SKI8	-0.332404	-0.378922	-0.482329	-0.385912	-0.419519	0.33616	0.305531	0.556216	0.119556	0.0742644	Ski complex component and WD-repeat protein; mediates 3'-5' RNA degradation by the cytoplasmic exosome; also required for meiotic double-strand break recombination; null mutants have superkiller phenotype	Ski Complex	DNA recombination_RNA catabolic process_meiotic cell cycle_organelle fission_protein complex biogenesis	NA	NA	RNA	other	0	623
YJL050W	MTR4	0.4422	0.799386	0.748649	0.331289	-0.245411	0.528148	0.0402836	0.12687	0.0244099	0.136468	ATP-dependent 3'-5' RNA helicase of the DExD/H family; involved in nuclear RNA processing and degradation both as a component of TRAMP complex and in TRAMP-independent processes; TRAMP unwinds RNA duplexes, with Mtr4p unwinding activity stimulated by Pap2p/Air2p but not dependent on ongoing polyadenylation; contains an arch domain, with two coiled-coil arms/stalks and a globular fist/KOW domain, …	TRAMP complex (Air2p)_TRAMP complex (Air1p)	RNA catabolic process_nuclear transport_nucleobase-containing compound transport_rRNA processing_snoRNA processing	NA	NA	RNA	other	0	624
YDL084W	SUB2	-0.540759	-0.419568	-0.632744	-0.390748	-0.26134	0.837437	0.119886	0.190082	0.188173	0.24404	Component of the TREX complex required for nuclear mRNA export; member of the DEAD-box RNA helicase superfamily and is involved in early and late steps of spliceosome assembly; homolog of the human splicing factor hUAP56; relocalizes from nucleus to cytoplasm upon DNA replication stress	transcription export complex	DNA repair_DNA-templated transcription, elongation_RNA splicing_cellular response to DNA damage stimulus_chromatin organization_mRNA processing_nuclear transport_nucleobase-containing compound transport_transcription from RNA polymerase II promoter	NA	NA	RNA	other	0	625
YPL029W	SUV3	-0.0405781	-0.49352	-0.512351	-0.524947	-0.65536	NA	NA	NA	NA	NA	ATP-dependent RNA helicase; component of the mitochondrial degradosome along with the RNase Dss1p; the degradosome associates with the ribosome and mediates RNA turnover; also required during splicing of the COX1 AI5_beta intron; expression of a processed form of human homolog SUPV3L1 carrying an N-terminal deletion of 46 amino acids rescues yeast suv3 null mutant	degradosome	DNA replication_RNA catabolic process_RNA splicing_mitochondrion organization	NA	NA	RNA	other	0	626
YNL138W	SRV2	0.125636	-0.469547	-0.666363	-0.73552	-0.313484	0.520375	0.0834201	0.39268	0.291147	0.376119	CAP (cyclase-associated protein); N-terminus binds adenylate cyclase and facilitates activation by RAS; N-terminus forms novel hexameric star-shaped shuriken structures that directly catalyze cofilin-mediated severing of actin filaments; C-terminus, in physically and genetically separate activity, binds and recycles cofilin bound, ADP-actin monomers, facilitating regulation of actin dynamics and …	adenylyl cyclase complex	cytoskeleton organization_regulation of organelle organization_signaling	NA	NA	other	other	0	627
YCR073W-A	SOL2	-0.793838	0.197446	0.179206	-0.0219633	-0.537602	0.862844	0.197754	0.136613	0.157958	0.296178	Protein with a possible role in tRNA export; shows similarity to 6-phosphogluconolactonase non-catalytic domains but does not exhibit this enzymatic activity; homologous to Sol3p and Sol4p; SOL2 has a paralog, SOL1, that arose from the whole genome duplication	NA	nuclear transport_nucleobase-containing compound transport	NA	NA	DNA	other	0	628
YJL080C	SCP160	-0.430932	-0.252739	-0.735609	-0.550815	-0.190962	1.49887	0.110354	0.611744	0.600368	0.601864	Essential RNA-binding G protein effector of mating response pathway; ligand-activated RNA-binding protein that delivers RNAs involved in polarization and perpetualizing mating signal to shmoo tip during pheromone signaling; Scp160p-mediated RNA trafficking essential for chemotropism and successful mating; mainly associated with nuclear envelope and ER, interacts in mRNA-dependent manner with tran…	NA	chromatin organization_chromosome segregation_conjugation_meiotic cell cycle_organelle fission_response to chemical_signaling	NA	NA	DNA	other	0	629
YMR239C	RNT1	-0.814594	-0.256594	-0.830518	-0.406355	-0.995862	NA	NA	NA	NA	NA	Nuclear dsRNA-specific ribonuclease (RNase III); involved in rDNA transcription, rRNA processing and U2 snRNA 3' end formation by cleavage of a stem-loop structure at the 3' end of U2 snRNA; involved in polyadenylation-independent transcription termination; involved in the cell wall stress response, regulating the degradation of cell wall integrity and morphogenesis checkpoint genes	NA	DNA-templated transcription, termination_RNA catabolic process_cell wall organization or biogenesis_chromatin organization_rRNA processing_snoRNA processing_transcription from RNA polymerase II promoter	NA	NA	RNA	other	0	630
YLR154C	RNH203	-0.469266	-0.420811	-0.502015	-0.483697	-0.238058	0.658574	0.079374	0.0287713	0.186621	0.232127	Ribonuclease H2 subunit; required for RNase H2 activity; role in ribonucleotide excision repair; related to human AGS3 that causes Aicardi-Goutieres syndrome	ribonuclease H2 complex	DNA replication_RNA catabolic process	NA	NA	RNA	other	0	631
YDR279W	RNH202	-0.516509	-0.165239	-0.187181	-0.215434	-0.297795	1.24706	0.358471	0.259266	0.438802	0.39631	Ribonuclease H2 subunit; required for RNase H2 activity; role in ribonucleotide excision repair; related to human AGS2 that causes Aicardi-Goutieres syndrome	ribonuclease H2 complex	DNA replication_RNA catabolic process	NA	NA	RNA	other	0	632
YNL072W	RNH201	-0.144267	-0.0386528	-0.100477	-0.145569	0.270557	0.409534	0.0510853	0.345261	0.298065	0.342472	Ribonuclease H2 catalytic subunit; removes RNA primers during Okazaki fragment synthesis and errant ribonucleotides misincorporated during DNA replication; role in ribonucleotide excision repair; homolog of RNAse HI; related to human AGS4 which causes Aicardi-Goutieres syndrome	ribonuclease H2 complex	DNA replication_RNA catabolic process	NA	NA	RNA	other	0	633
YGL014W	PUF4	-1.95029	-0.468598	-0.22717	-1.00169	-0.610718	NA	0.506816	1.03108	0.786348	0.559981	Member of the PUF protein family; PUF family is defined by the presence of Pumilio homology domains that confer RNA binding activity; preferentially binds mRNAs encoding nucleolar ribosomal RNA-processing factors	NA	RNA catabolic process_chromatin organization_regulation of translation	NA	NA	RNA	other	0	634
YLL036C	PRP19	-0.18247	-0.172806	-0.114476	-0.0252414	0.0681054	0.361816	0.242093	0.112868	0.0123974	0.244225	Splicing factor associated with the spliceosome; contains a U-box, a motif found in a class of ubiquitin ligases, and a WD40 domain; relocalizes to the cytosol in response to hypoxia	Prp19-associated complex	RNA splicing_mRNA processing	NA	NA	RNA	other	0	635
YCR077C	PAT1	-0.785417	-0.486141	-0.647213	-0.517056	0.234725	0.99266	0.0515387	0.406151	0.0776264	0.965969	Deadenylation-dependent mRNA-decapping factor; also required for faithful chromosome transmission, maintenance of rDNA locus stability, and protection of mRNA 3'-UTRs from trimming; associated with topoisomerase II; binds to mRNAs under glucose starvation, most often in the 3' UTR; functionally linked to Pab1p; forms cytoplasmic foci upon DNA replication stress; phosphorylation by PKA inhibits P …	NA	RNA catabolic process_chromatin organization_chromosome segregation_organelle assembly_regulation of translation_translational initiation	NA	NA	RNA	other	0	636
YPL126W	NAN1	-0.0708005	-0.455561	-0.477995	-0.497339	-0.522023	0.158663	0.430944	0.521711	0.731529	1.21332	U3 snoRNP protein; component of the small (ribosomal) subunit (SSU) processosome containing U3 snoRNA; required for the biogenesis of18S rRNA	UTP A complex	rRNA processing_ribosomal small subunit biogenesis_transcription from RNA polymerase I promoter	NA	NA	RNA	other	0	637
YNL124W	NAF1	-0.393811	0.251658	0.297859	0.0214067	0.194944	0.569473	0.0929225	0.148413	0.301173	0.309705	RNA-binding protein required for the assembly of box H/ACA snoRNPs; thus required for pre-rRNA processing; forms a complex with Shq1p and interacts with H/ACA snoRNP components Nhp2p and Cbf5p; similar to Gar1p	Shq1p/Naf1p complex	other	NA	NA	other	other	0	638
YPL184C	MRN1	-0.216535	-0.759812	-0.369348	-0.381153	-0.252152	0.507085	0.641252	0.311159	0.416668	0.33509	RNA-binding protein that may be involved in translational regulation; binds specific categories of mRNAs, including those that contain upstream open reading frames (uORFs) and internal ribosome entry sites (IRES); interacts genetically with chromatin remodelers and splicing factors, linking chromatin state, splicing and as a result mRNA maturation	NA	RNA splicing_chromatin organization_mRNA processing	NA	NA	RNA	other	0	639
YJL124C	LSM1	-1.0257	-0.243376	-0.46966	-0.477803	0.810494	1.05005	0.0873629	0.590875	0.491276	0.56946	Lsm (Like Sm) protein; forms heteroheptameric complex (with Lsm2p, Lsm3p, Lsm4p, Lsm5p, Lsm6p, and Lsm7p) involved in degradation of cytoplasmic mRNAs; also enters the nucleus and positively regulates transcription initiation; unlike most Sm-like proteins, Lsm1p requires both its SM-domain and C-terminal domain for RNA-binding; binds to mRNAs under glucose starvation, most often in the 3' UTR; fo…	NA	RNA catabolic process	NA	NA	RNA	other	0	640
YHR156C	LIN1	-0.658706	-0.43439	-0.197058	-0.332448	-0.547607	0.949376	0.328642	0.274447	0.148482	0.496363	Non-essential component of U5 snRNP; nuclear protein; physically interacts with Irr1p of cohesin complex; may link together proteins involved in chromosome segregation, mRNA splicing and DNA replication	U5 snRNP complex	biological_process	NA	NA	other	other	0	641
YBL032W	HEK2	-0.784361	-0.475834	-0.359768	-0.50315	-0.473946	1.38813	0.567903	0.346503	0.567492	0.257132	RNA binding protein involved in asymmetric localization of ASH1 mRNA; represses translation of ASH1 mRNA, an effect reversed by Yck1p-dependent phosphoryation; regulates telomere position effect and length; similarity to hnRNP-K	NA	telomere organization	NA	NA	other	other	0	642
YHR087W	RTC3	-0.8981	-0.0954738	-0.202294	-0.36529	-0.23707	NA	0.448653	0.164996	0.112593	0.210441	Protein of unknown function involved in RNA metabolism; has structural similarity to SBDS, the human protein mutated in Shwachman-Diamond Syndrome (the yeast SBDS ortholog = SDO1); null mutation suppresses cdc13-1 temperature sensitivity; protein abundance increases in response to DNA replication stress	NA	other	NA	NA	other	other	0	643
YKL214C	YRA2	-0.237864	-0.609054	-0.61988	-0.448062	-0.386224	0.565706	0.647768	0.447871	0.586857	0.752543	Member of the REF (RNA and export factor binding proteins) family; when overexpressed, can substitute for the function of Yra1p in export of poly(A)+ mRNA from the nucleus	NA	nuclear transport_nucleobase-containing compound transport	NA	NA	RNA	other	0	644
YMR229C	RRP5	0.981615	1.30799	0.924378	1.24173	0.140519	0.0277419	0.209412	0.264478	0.176067	0.0810318	RNA binding protein involved in synthesis of both 18S and 5.8S rRNAs; component of both the ribosomal small subunit (SSU) processosome and the 90S preribosome; acts as part of a Mak21p-Noc2p-Rrp5p module that associates with nascent pre-rRNA during transcription and has a role in bigenesis of the large ribosomal subunit; has binding preference for single stranded tracts of U's; relocalizes from n…	NA	organelle assembly_rRNA processing_ribosomal large subunit biogenesis_ribosomal small subunit biogenesis_ribosome assembly	NA	NA	RNA	other	0	645
YOR243C	PUS7	0.816086	1.17447	1.08258	0.694551	0.254633	0.434259	0.120891	0.129281	0.269996	0.429296	Pseudouridine synthase; catalyzes pseudouridylation at positions 35 and 56 in U2 snRNA, position 50 in 5S rRNA, position 13 in cytoplasmic tRNAs, and position 35 in pre-tRNA(Tyr); also pseudouridylates some mRNAs; relocates from nucleus to cytoplasm during heat shock and differentially modifies some mRNAs during heat shock; conserved in archaea, vertebrates, and some bacteria	NA	RNA modification_rRNA processing_tRNA processing	NA	NA	RNA	other	0	646
YHR089C	GAR1	-0.115594	1.34618	1.13851	0.766768	1.19216	1.64838	0.651956	0.158852	0.372401	0.418791	Protein component of the H/ACA snoRNP pseudouridylase complex; involved in the modification and cleavage of the 18S pre-rRNA	NA	RNA modification	NA	NA	RNA	other	0	647
YLR175W	CBF5	0.487814	0.387774	0.0753897	0.273245	0.0488812	NA	0.332341	0.562794	0.122575	0.78362	Pseudouridine synthase catalytic subunit of box H/ACA snoRNPs; acts on large and small rRNAs, on snRNA U2, and on some mRNAs; mutations in human ortholog dyskerin cause the disorder dyskeratosis congenita; small nucleolar ribonucleoprotein particles are also known as snoRNPs	NA	RNA modification_rRNA processing_snoRNA processing	NA	NA	RNA	other	0	648
YOR051C	ETT1	0.597063	1.59843	1.42432	1.34406	0.648659	0.712328	0.242478	0.20954	0.23357	1.0682	Nuclear protein that inhibits replication of Brome mosaic virus; S. cerevisiae is a model system for studying replication of positive-strand RNA viruses in their natural hosts; deletion increases stop codon readthrough	NA	other	NA	NA	other	other	0	649
YGR159C	NSR1	1.16323	1.62578	1.52365	1.55155	1.41547	0.804307	0.156461	0.166682	0.343457	0.271436	Nucleolar protein that binds nuclear localization sequences; required for pre-rRNA processing and ribosome biogenesis; binds to single stranded telomeric DNA and mRNA; methylated by Hmt1p; interaction with Top1p and nucleolar localization are negatively regulated by polyphosphorylation	NA	organelle assembly_rRNA processing_ribosomal small subunit biogenesis_ribosome assembly	NA	NA	RNA	other	0	650
YGR218W	CRM1	-0.73233	0.581338	0.528288	0.0316338	0.262381	1.0965	0.0671037	0.359269	0.125156	0.873415	Major karyopherin; involved in export of proteins, RNAs, and ribosomal subunits from the nucleus; exportin	NA	nuclear transport_nucleobase-containing compound transport_ribosomal subunit export from nucleus	NA	NA	DNA	other	0	651
YNL178W	RPS3	-0.615629	-0.235507	-0.300485	-0.195527	-0.359863	1.47091	0.0771107	0.408472	0.448022	0.788274	Protein component of the small (40S) ribosomal subunit; has apurinic/apyrimidinic (AP) endonuclease activity; essential for viability; nascent Rps3p is bound by specific chaperone Yar1p during translation; homologous to mammalian ribosomal protein S3 and bacterial S3	cytoplasmic ribosomal small subunit	cytoplasmic translation_nuclear transport_nucleobase-containing compound transport_ribosomal subunit export from nucleus	NA	NA	DNA	other	0	652
YPR132W	RPS23B	0.284896	0.766297	0.512331	0.595168	0.344872	0.407354	0.131993	0.237685	0.210028	0.160749	Ribosomal protein 28 (rp28) of the small (40S) ribosomal subunit; required for translational accuracy; homologous to mammalian ribosomal protein S23 and bacterial S12; RPS23B has a paralog, RPS23A, that arose from the whole genome duplication; deletion of both RPS23A and RPS23B is lethal	cytoplasmic ribosomal small subunit	rRNA processing_regulation of translation_ribosomal small subunit biogenesis_translational elongation	NA	NA	RNA	other	0	653
YML073C	RPL6A	1.08645	2.49466	2.28367	2.01915	0.878143	0.0706313	0.0358092	0.175034	0.116629	0.527986	Ribosomal 60S subunit protein L6A; N-terminally acetylated; binds 5.8S rRNA; homologous to mammalian ribosomal protein L6, no bacterial homolog; RPL6A has a paralog, RPL6B, that arose from the whole genome duplication	cytoplasmic ribosomal large subunit	cytoplasmic translation_organelle assembly_ribosomal large subunit biogenesis_ribosome assembly	NA	NA	other	other	0	654
YGL135W	RPL1B	0.349264	0.369296	0.0606259	0.145394	0.0501588	0.199141	0.602679	0.554747	0.426549	0.683534	Ribosomal 60S subunit protein L1B; N-terminally acetylated; homologous to mammalian ribosomal protein L10A and bacterial L1; RPL1B has a paralog, RPL1A, that arose from the whole genome duplication; rpl1a rpl1b double null mutation is lethal	cytoplasmic ribosomal large subunit	cytoplasmic translation	NA	NA	other	other	0	655
YMR121C	RPL15B	-0.382231	0.544984	0.0478477	0.327124	0.0795351	0.383426	0.108045	0.435673	0.427436	0.195952	Ribosomal 60S subunit protein L15B; binds to 5.8 S rRNA; homologous to mammalian ribosomal protein L15, no bacterial homolog; RPL15B has a paralog, RPL15A, that arose from the whole genome duplication; relocalizes from nucleus to nucleolus upon DNA replication stress	cytoplasmic ribosomal large subunit	cytoplasmic translation	NA	NA	other	other	0	656
YGL048C	RPT6	-1.27375	-0.467257	-0.326592	-0.0952057	-0.202027	NA	NA	NA	NA	NA	ATPase of the 19S regulatory particle of the 26S proteasome; one of six ATPases of the regulatory particle; involved in the degradation of ubiquitinated substrates; bound by ubiquitin-protein ligases Ubr1p and Ufd4p; localized mainly to the nucleus throughout the cell cycle; protein abundance increases in response to DNA replication stress	19/22S regulator	DNA repair_DNA-templated transcription, elongation_DNA-templated transcription, initiation_RNA catabolic process_cellular response to DNA damage stimulus_chromatin organization_protein complex biogenesis_proteolysis involved in cellular protein catabolic process_transcription from RNA polymerase II promoter	NA	NA	RNA	other	0	657
YDR427W	RPN9	-0.905615	-0.414398	-0.279656	-0.336299	0.215868	0.496738	0.291505	0.439281	0.439495	0.210551	Non-ATPase regulatory subunit of the 26S proteasome; similar to putative proteasomal subunits in other species; null mutant is temperature sensitive and exhibits cell cycle and proteasome assembly defects; protein abundance increases in response to DNA replication stress; relocalizes to the cytosol in response to hypoxia	19/22S regulator	protein complex biogenesis_proteolysis involved in cellular protein catabolic process	NA	NA	other	other	0	658
YBR272C	HSM3	-0.134951	-0.678873	-0.761411	-0.835867	-0.651661	0.335511	0.372395	0.535816	0.727266	0.65263	Proteasome-interacting protein; involved in the assembly of the base subcomplex of the 19S proteasomal regulatory particle (RP); involved in DNA mismatch repair during slow growth; weak similarity to Msh1p; related to human 19S subunit S5b; structural study suggests Hsm3p is a scaffold protein for Rpt1p-Rpt2p complex formation	NA	DNA repair_cellular response to DNA damage stimulus_protein complex biogenesis	NA	NA	DNA	other	0	659
YFL007W	BLM10	-0.0220756	0.0530416	0.014225	-0.201401	0.24957	0.788373	0.536647	0.640471	0.258477	0.532433	Proteasome activator; binds the core proteasome (CP) and stimulates proteasome-mediated protein degradation by inducing gate opening; required for sequestering CP into proteasome storage granule (PSG) during quiescent phase and for nuclear import of CP in proliferating cells; required for resistance to bleomycin, may be involved in protecting against oxidative damage; similar to mammalian PA200	NA	nuclear transport_protein complex biogenesis_protein targeting_proteolysis involved in cellular protein catabolic process	NA	NA	DNA	other	0	660
YDR363W-A	SEM1	0.598387	0.109864	0.2783	0.00557915	0.358675	0.257594	0.0697478	0.150529	0.295435	0.602345	Component of lid subcomplex of 26S proteasome regulatory subunit; involved in mRNA export mediated by TREX-2 complex (Sac3p-Thp1p); assumes different conformations in different contexts, functions as molecular glue stabilizing the Rpn3p/Rpn7p regulatory heterodimer, and tethers it to lid helical bundle; ortholog of human DSS1; protein abundance increases in response to DNA replication stress	19/22S regulator	chromatin organization_exocytosis_histone modification_nuclear transport_nucleobase-containing compound transport_protein complex biogenesis_protein modification by small protein conjugation or removal_proteolysis involved in cellular protein catabolic process_regulation of cell cycle	NA	NA	DNA	other	0	661
YDL097C	RPN6	0.07517	0.706384	0.319125	0.349232	0.114161	0.435375	0.0612854	0.299602	0.25316	0.114752	Essential, non-ATPase regulatory subunit of the 26S proteasome lid; required for the assembly and activity of the 26S proteasome; the human homolog (S9 protein) partially rescues Rpn6p depletion; protein abundance increases in response to DNA replication stress	19/22S regulator	protein complex biogenesis_proteolysis involved in cellular protein catabolic process	NA	NA	other	other	0	662
YFR050C	PRE4	-1.18887	0.72115	0.395261	0.339993	0.779068	1.08001	0.325504	0.226114	0.259174	0.319258	Beta 7 subunit of the 20S proteasome	20S proteasome	protein complex biogenesis_proteolysis involved in cellular protein catabolic process	NA	NA	other	other	0	663
YIL033C	BCY1	-0.498474	-0.508796	-0.327581	-0.464387	-0.622901	1.06146	0.314067	0.178201	0.25866	0.292095	Regulatory subunit of the cyclic AMP-dependent protein kinase (PKA); PKA is a component of a signaling pathway that controls a variety of cellular processes, including metabolism, cell cycle, stress response, stationary phase, and sporulation	cAMP-dependent protein kinase	nucleobase-containing small molecule metabolic process_signaling	NA	NA	metabolism	other	0	664
YJL164C	TPK1	0.324809	-0.721977	-0.22709	0.0258611	-0.136169	0.22304	0.386529	0.330653	0.197317	0.261797	cAMP-dependent protein kinase catalytic subunit; promotes vegetative growth in response to nutrients via the Ras-cAMP signaling pathway; inhibited by regulatory subunit Bcy1p in the absence of cAMP; phosphorylates and inhibits Whi3p to promote G1/S phase passage; partially redundant with Tpk2p and Tpk3p; phosphorylates pre-Tom40p, which impairs its import into mitochondria under non-respiratory c…	cAMP-dependent protein kinase	protein phosphorylation_signaling	NA	NA	other	other	0	665
YBR160W	CDC28	-1.2529	-0.774358	-0.207252	-0.636651	-0.979257	2.95791	0.743469	0.669598	1.19391	0.932489	Cyclin-dependent kinase (CDK) catalytic subunit; master regulator of mitotic and meiotic cell cycles; alternately associates with G1, S, G2/M phase cyclins, which provide substrate specificity; regulates basal transcription, chromosome dynamics, growth, morphogenesis; transcript induction in osmostress involves antisense RNA; human homologs CDK1, CDK2, CDK3 can each complement yeast cdc28 thermos…	Cdc28p/Clb5p complex_Cdc28p/Cln2p complex_Cdc28p/Clb1p complex_Cdc28p/Clb6p complex_Cdc28p/Cln1p complex_Cdc28p/Clb3p complex_Cdc28p/Cln3p complex_Cdc28p/Clb4p complex_Cdc28p/Clb2p complex	DNA recombination_DNA repair_DNA replication_carbohydrate metabolic process_cell budding_cellular response to DNA damage stimulus_chromatin organization_chromosome segregation_cytoskeleton organization_generation of precursor metabolites and energy_lipid metabolic process_mRNA processing_meiotic cell cycle_mitotic cell cycle_oligosaccharide metabolic process_organelle assembly_organelle fission_p…	NA	NA	RNA	other	0	666
YKR038C	KAE1	-0.388625	-0.0231466	-0.200241	-0.0744377	-0.0655245	0.771648	0.130242	0.340285	0.220478	0.0688255	Highly conserved ATPase of HSP70/DnaK family; essential functional component of the EKC/KEOPS complex, with Bud32p, Cgi121p, Pcc1p, and Gon7p; EKC/KEOPS complex is required for t6A tRNA modification and telomeric TG1-3 recombination; may have role in transcription	EKC/KEOPS protein complex	DNA recombination_RNA modification_tRNA processing_telomere organization_transcription from RNA polymerase II promoter	NA	NA	RNA	other	0	667
YJL184W	GON7	-0.325071	-0.15485	-0.08182	-0.039616	-0.0783822	0.231588	0.092732	0.167984	0.22393	0.35582	Component of the EKC/KEOPS protein complex; EKC/KEOPS complex is required for t6A tRNA modification and telomeric TG1-3 recombination; may have role in transcription; implicated in osmotic stress response; other complex members are Kae1p, Cgi121p, Pcc1p, and Bud32p	EKC/KEOPS protein complex	DNA recombination_cell wall organization or biogenesis_telomere organization_transcription from RNA polymerase II promoter	NA	NA	DNA	other	0	668
YML121W	GTR1	-0.729546	-0.505929	-0.536689	-0.407784	-0.638608	0.399028	0.50826	0.323412	0.194038	0.540965	Subunit of a TORC1-stimulating GTPase complex; subunit of the heterodimeric Gtr1-Gtr2 GTPase complex that stimulates TORC1 in response to amino acid stimulation; tethered to the vacuolar membrane as part of the EGOC, a complex required for sorting of Gap1p and microautophagy; involved in phosphate transport and telomeric chromatin silencing; activated by the the Iml1p (GAP) subunit of the SEACIT …	GSE Complex	chromatin organization_ion transport_signaling_transcription from RNA polymerase I promoter_transcription from RNA polymerase III promoter	NA	NA	DNA	other	0	669
YOR341W	RPA190	0.120925	0.895244	0.933698	1.12467	0.566481	NA	NA	NA	NA	NA	RNA polymerase I largest subunit A190	DNA-directed RNA polymerase I complex	transcription from RNA polymerase I promoter	NA	NA	DNA	other	0	670
YDR156W	RPA14	-0.783102	-0.0248692	0.0800779	0.242548	-0.074663	0.942853	0.452651	0.0525028	0.813773	0.798946	RNA polymerase I subunit A14	DNA-directed RNA polymerase I complex	transcription from RNA polymerase I promoter	NA	NA	DNA	other	0	671
YJL011C	RPC17	-0.00363954	-0.0565267	0.0912998	0.17774	0.564606	0.817625	0.822941	0.434694	0.500045	0.666241	RNA polymerase III subunit C17; physically interacts with C31, C11, and TFIIIB70; may be involved in the recruitment of pol III by the preinitiation complex; protein abundance increases in response to DNA replication stress; relocalizes to the cytosol in response to hypoxia	DNA-directed RNA polymerase III complex	DNA-templated transcription, initiation_transcription from RNA polymerase III promoter	NA	NA	DNA	other	0	672
YDR361C	BCP1	0.510695	0.671514	0.79081	0.294218	0.477157	0.231886	0.229573	0.208714	0.177026	0.182979	Essential protein involved in nuclear export of Mss4p; Mss4p is a lipid kinase that generates phosphatidylinositol 4,5-biphosphate and plays a role in actin cytoskeleton organization and vesicular transport	NA	nuclear transport_ribosomal subunit export from nucleus	NA	NA	DNA	other	0	673
YNL140C	#REF!	0.118439	-0.380825	0.121402	0.166219	0.451957	0.468371	0.316175	0.299205	0.303299	0.330986	NA	NA	NA	NA	NA	NA	NA	0	674
YJR084W	#REF!	-0.153138	-0.18268	-0.0757361	-0.114887	0.148818	0.978288	0.15037	0.147303	0.402254	0.190849	Protein that forms a complex with Thp3p; may have a role in transcription elongation and/or mRNA splicing; identified as a COP9 signalosome component but phenotype and interactions suggest it may not be involved with the signalosome	signalosome complex	RNA splicing_conjugation_mRNA processing_response to chemical_signaling	NA	NA	RNA	other	0	675
YGR016W	#REF!	-1.05622	-0.425224	-0.450977	-0.261704	-0.149599	0.908413	0.112702	0.427903	0.207166	0.261111	NA	NA	NA	NA	NA	NA	NA	0	676
YHR182W	#REF!	-0.301815	-0.222508	-0.240196	-0.391761	0.142158	0.20119	0.386881	0.509002	0.25243	0.739083	Protein of unknown function; green fluorescent protein (GFP)-fusion protein localizes to the cell periphery and cytoplasm; relocalizes from bud neck to cytoplasm upon DNA replication stress	NA	biological_process	NA	NA	other	other	0	677
YGR042W	#REF!	-0.449625	-0.619193	-0.454486	-0.42824	-0.415765	0.034742	0.32718	0.22942	0.187803	0.64605	Protein of unknown function; involved in maintenance of proper telomere length; green fluorescent protein (GFP)-fusion protein localizes to both the cytoplasm and the nucleus; forms nuclear foci upon DNA replication stress	NA	regulation of DNA metabolic process_regulation of organelle organization_telomere organization	NA	NA	DNA	other	0	678
YML109W	ZDS2	-0.553877	-0.571271	-0.617672	-0.61511	-0.605077	1.00139	0.0814669	0.063844	0.317439	0.131409	Protein with a role in regulating Swe1p-dependent polarized growth; involved in maintenance of Cdc55p in the cytoplasm where it promotes mitotic entry; interacts with silencing proteins at the telomere; implicated in the mitotic exit network through regulation of Cdc14p localization; ZDS2 has a paralog, ZDS1, that arose from the whole genome duplication	NA	chromatin organization_mitotic cell cycle_regulation of cell cycle	NA	NA	DNA	other	0	679
YMR273C	ZDS1	-0.95001	-0.616282	-0.454032	-0.636983	-1.03848	0.590797	0.289064	0.0650087	0.577891	1.2641	Protein with a role in regulating Swe1p-dependent polarized growth; involved in maintaining Cdc55p in the cytoplasm where it promotes mitotic entry; involved in mitotic exit through Cdc14p regulation; interacts with silencing proteins at telomeres; has a role in Bcy1p localization; implicated in mRNA nuclear export; ZDS1 has a paralog, ZDS2, that arose from the whole genome duplication	NA	chromatin organization_mitotic cell cycle_nuclear transport_nucleobase-containing compound transport_regulation of cell cycle	NA	NA	DNA	other	0	680
YIL063C	YRB2	-0.550222	-0.438412	-0.25016	-0.029465	-0.477687	0.664196	0.363928	0.44711	0.6186	0.780612	Protein of unknown function; involved in nuclear processes of the Ran-GTPase cycle; involved in nuclear protein export; contains Ran Binding Domain and FxFG repeats; interacts with Srm1p, GTP-Gsp1p, Rna1p and Crm1p; relocalizes to the cytosol in response to hypoxia; not essential for viability	NA	chromatin organization_nuclear transport_ribosomal subunit export from nucleus	NA	NA	DNA	other	0	681
YDR520C	URC2	-1.15321	-0.781396	-0.694562	-0.547495	-0.537768	0.739582	0.0892825	0.385979	0.377709	0.330501	NA	NA	NA	NA	NA	NA	NA	0	682
YDL091C	UBX3	-0.0647788	-0.68716	-0.402616	-0.256354	-0.153357	0.662641	0.410134	0.417651	0.300146	0.443102	Clathrin-coated vesicle component, regulator of endocytosis; copurifies with the DSC ubiquitin ligase complex; UBX (ubiquitin regulatory X) domain-containing protein that interacts with Cdc48p; required for efficient clathrin-mediated endocytosis; ortholog of fission yeast Ucp10	NA	chromatin organization_endocytosis_histone modification_protein modification by small protein conjugation or removal	NA	NA	DNA	other	0	683
YDL064W	UBC9	0.286821	-0.214411	-0.263145	-0.110736	-0.62406	0.661968	0.358715	0.321945	0.565242	0.787608	SUMO-conjugating enzyme involved in the Smt3p conjugation pathway; nuclear protein required for S- and M-phase cyclin degradation and mitotic control; involved in proteolysis mediated by the anaphase-promoting complex cyclosome (APCC)	NA	chromosome segregation_cytoskeleton organization_mitotic cell cycle_organelle fission_peptidyl-amino acid modification_protein modification by small protein conjugation or removal	NA	NA	DNA	other	0	684
YMR022W	UBC7	-1.27031	-0.331601	-0.374803	-0.425639	-0.0989408	1.1412	0.26612	0.230685	0.0576795	0.116306	Ubiquitin conjugating enzyme; involved in the ER-associated protein degradation pathway; requires Cue1p for recruitment to the ER membrane; proposed to be involved in chromatin assembly	NA	cell wall organization or biogenesis_chromatin organization_proteolysis involved in cellular protein catabolic process_response to chemical	NA	NA	DNA	other	0	685
YOL093W	TRM10	-0.519047	0.0899332	0.165407	0.243127	0.0232958	0.538237	0.32757	0.0605409	0.0869656	0.238768	tRNA methyltransferase; methylates the N-1 position of guanine at position 9 in tRNAs; protein abundance increases in response to DNA replication stress; member of the SPOUT (SpoU-TrmD) methyltransferase family; human ortholog TRMT10A plays a role in the pathogenesis of microcephaly and early onset diabetes; an 18-mer originates from the TRM10 locus; genetic analysis shows the 18-mer is the trans…	NA	RNA modification_tRNA processing	NA	NA	RNA	other	0	686
YJR066W	TOR1	0.304929	-0.047423	0.197646	-0.743914	1.03844	NA	0.426925	0.226006	0.686777	1.02078	PIK-related protein kinase and rapamycin target; subunit of TORC1, a complex that controls growth in response to nutrients by regulating translation, transcription, ribosome biogenesis, nutrient transport and autophagy; involved in meiosis; TOR1 has a paralog, TOR2, that arose from the whole genome duplication	TORC 1 complex	RNA modification_cell wall organization or biogenesis_cellular response to DNA damage stimulus_lipid metabolic process_meiotic cell cycle_organelle fission_peptidyl-amino acid modification_protein phosphorylation_regulation of cell cycle_signaling_transcription from RNA polymerase I promoter_translational initiation	NA	NA	RNA	other	0	687
YDR172W	SUP35	-0.764264	-0.46397	-0.0323876	-0.187226	-0.174834	NA	NA	NA	NA	NA	Translation termination factor eRF3; has a role in mRNA deadenylation and decay; altered protein conformation creates the [PSI(+)] prion that modifies cellular fitness, alters translational fidelity by affecting reading frame selection, and results in a nonsense suppressor phenotype; many stress-response genes are repressed in the presence of [PSI(+)]	translation release factor complex	RNA catabolic process	NA	NA	RNA	other	0	688
YML034W	SRC1	-0.240446	-0.579494	-0.411836	-0.516351	-0.37009	0.66799	0.307179	0.338175	0.218264	0.487596	Inner nuclear membrane protein; highly enriched at telomeres and subtelomeric regions; functions in regulation of subtelomeric genes and is linked to TREX (transcription export) factors; SRC1 produces 2 splice variant proteins with different functions; alternative splicing of SRC1 pre-mRNA is promoted by Hub1p; mutant has aneuploidy tolerance; SEC1 has a paralog, HEH2, that arose from the whole g…	NA	chromosome segregation_mitotic cell cycle_organelle fission	NA	NA	DNA	other	0	689
YKL020C	SPT23	0.0452314	-0.284553	-0.442414	-0.268048	-0.324096	0.753323	0.153939	0.109979	0.279057	0.423643	ER membrane protein involved in regulation of OLE1 transcription; inactive ER form dimerizes and one subunit is then activated by ubiquitin/proteasome-dependent processing followed by nuclear targeting; SPT23 has a paralog, MGA2, that arose from the whole genome duplication	NA	chromatin organization_lipid metabolic process_monocarboxylic acid metabolic process_transcription from RNA polymerase II promoter	NA	yetfasco	DNA	other	0	690
YDR510W	SMT3	-0.469892	-0.442408	-0.545202	-0.191048	-0.167422	0.849559	0.166291	0.0315695	0.256894	0.86396	Ubiquitin-like protein of the SUMO family; conjugated to lysine residues of target proteins; associates with transcriptionally active genes; regulates chromatid cohesion, chromosome segregation, APC-mediated proteolysis, DNA replication and septin ring dynamics; human homolog SUMO1 can complement yeast null mutant	NA	peptidyl-amino acid modification_protein modification by small protein conjugation or removal	NA	NA	other	other	0	691
YDL047W	SIT4	-0.411142	-0.988977	-0.565257	-0.583837	-0.195102	0.749215	0.92423	0.682252	0.427139	0.536415	Type 2A-related serine-threonine phosphatase; functions in the G1/S transition of the mitotic cycle; regulator of COPII coat dephosphorylation; required for ER to Golgi traffic; interacts with Hrr25p kinase; cytoplasmic and nuclear protein that modulates functions mediated by Pkc1p including cell wall and actin cytoskeleton organization; similar to human PP6	Sap190p/Sit4p complex_Sap155p/Sit4p complex_Tap42p/Sit4p/Rrd1p complex_Sap185p/Sit4p complex	DNA repair_RNA modification_cell wall organization or biogenesis_cellular response to DNA damage stimulus_cytoskeleton organization_mitotic cell cycle_protein dephosphorylation_response to chemical_response to oxidative stress_signaling_tRNA processing	NA	NA	RNA	other	0	692
YER120W	SCS2	-1.36223	-0.627863	-0.315992	-0.29578	-0.56882	0.717188	0.623739	0.354675	0.097117	0.229134	Integral ER membrane protein, regulates phospholipid metabolism; one of 6 proteins (Ist2p, Scs2p, Scs22p, Tcb1p, Tcb2p, Tcb3p) that connect ER to plasma membrane (PM) and regulate PI4P levels by controlling access of Sac1p phosphatase to substrate PI4P in the PM; interacts with FFAT motifs in Opi1p, Swh1p, Osh2p, and Osh3p; involved in telomeric silencing; VAP homolog; SCS2 has a paralog, SCS22, …	NA	chromatin organization_lipid metabolic process_lipid transport_nuclear transport_organelle inheritance_protein targeting_regulation of transport	NA	NA	DNA	other	0	693
YHR205W	SCH9	-0.0012049	-0.399612	-0.32927	-0.391697	-0.44202	0.674347	0.42074	0.745794	0.349547	0.599879	AGC family protein kinase; functional ortholog of mammalian S6 kinase; phosphorylated by Tor1p and required for TORC1-mediated regulation of ribosome biogenesis, translation initiation, and entry into G0 phase; involved in transactivation of osmostress-responsive genes; regulates G1 progression, cAPK activity and nitrogen activation of the FGM pathway; integrates nutrient signals and stress signa…	NA	lipid metabolic process_protein phosphorylation_response to chemical_response to osmotic stress_response to oxidative stress_transcription from RNA polymerase I promoter_transcription from RNA polymerase II promoter_transcription from RNA polymerase III promoter	NA	NA	DNA	other	0	694
YER129W	SAK1	-0.403375	-0.491801	-0.570096	-0.389225	-0.284025	NA	0.275159	0.182795	0.278767	0.750668	Upstream serine/threonine kinase for the SNF1 complex; plays a role in pseudohyphal groth; partially redundant with Elm1p and Tos3p; members of this family have functional orthology with LKB1, a mammalian kinase associated with Peutz-Jeghers cancer-susceptibility syndrome; SAK1 has a paralog, TOS3, that arose from the whole genome duplication	NA	DNA replication_carbohydrate metabolic process_peptidyl-amino acid modification_protein phosphorylation_pseudohyphal growth	NA	NA	DNA	other	0	695
YJL047C	RTT101	-0.283412	-0.580508	-0.694853	-0.287424	0.276854	1.0543	0.289283	0.369612	0.34298	0.246326	Cullin subunit of a Roc1p-dependent E3 ubiquitin ligase complex; role in anaphase progression; implicated in Mms22-dependent DNA repair; involved with Mms1p in nonfunctional rRNA decay; modified by the ubiquitin-like protein, Rub1p	NA	DNA replication_RNA catabolic process_mitotic cell cycle_organelle fission_proteolysis involved in cellular protein catabolic process_regulation of cell cycle_regulation of organelle organization_transposition	NA	NA	RNA	other	0	696
YOR014W	RTS1	-0.324898	-0.142362	-0.0241566	0.0753793	-0.319559	0.97737	0.118028	0.144533	0.0418531	0.407613	B-type regulatory subunit of protein phosphatase 2A (PP2A); Rts1p and Cdc55p are alternative regulatory subunits for PP2A catalytic subunits, Pph21p and Pph22p; PP2A-Rts1p protects cohesin when recruited by Sgo1p to the pericentromere; highly enriched at centromeres in the absence of Cdc55p; required for maintenance of septin ring organization during cytokinesis, for ring disassembly in G1 and fo…	protein phosphatase type 2A complex (Rts1p)	chromosome segregation_cytokinesis_cytoskeleton organization_meiotic cell cycle_mitotic cell cycle_organelle fission_protein dephosphorylation_regulation of cell cycle_regulation of organelle organization	NA	NA	DNA	other	0	697
YGL252C	RTG2	-0.269906	-0.359684	-0.648039	-0.29152	-0.0808052	1.02605	0.264966	0.753035	0.592465	0.471234	Sensor of mitochondrial dysfunction; regulates the subcellular location of Rtg1p and Rtg3p, transcriptional activators of the retrograde (RTG) and TOR pathways; Rtg2p is inhibited by the phosphorylated form of Mks1p	Mks1p/Rtg2p complex_SLIK (SAGA-like) complex	chromatin organization_nuclear transport_protein targeting_response to chemical_signaling_transcription from RNA polymerase II promoter	NA	NA	DNA	other	0	698
YMR235C	RNA1	-0.292771	-0.547476	-0.121868	-0.603859	-0.0233508	NA	NA	NA	NA	NA	GTPase activating protein (GAP) for Gsp1p; involved in nuclear transport	NA	chromatin organization_nuclear transport_nucleobase-containing compound transport_protein targeting_ribosomal subunit export from nucleus	NA	NA	DNA	other	0	699
YMR247C	RKR1	0.277966	-0.432046	-0.692882	-0.655559	-0.996231	0.715388	0.288201	0.368723	0.0987882	1.28545	RING domain E3 ubiquitin ligase; involved in ubiquitin-mediated degradation of non-stop proteins and translationally stalled ER membrane proteins; component of ribosome-bound RQC (ribosome quality control) complex; degrades products of mRNAs lacking a termination codon regardless of a poly(A) tail; functional connections to chromatin modification; homolog of mouse Listerin, mutations in which rep…	NA	chromatin organization_protein modification by small protein conjugation or removal_proteolysis involved in cellular protein catabolic process_regulation of translation_translational elongation	NA	NA	DNA	other	0	700
YDR028C	REG1	-1.2962	-0.43212	-0.717245	-0.817984	-0.841288	0.719729	0.191624	0.478823	0.34669	0.975979	Regulatory subunit of type 1 protein phosphatase Glc7p; involved in negative regulation of glucose-repressible genes; involved in regulation of the nucleocytoplasmic shuttling of Hxk2p; REG1 has a paralog, REG2, that arose from the whole genome duplication	Reg1p/Glc7p complex	carbohydrate metabolic process_chromatin organization_generation of precursor metabolites and energy_response to chemical_response to starvation_transcription from RNA polymerase II promoter	NA	NA	DNA	other	0	701
YOL054W	PSH1	-1.53265	-0.00687872	0.00612901	0.142959	0.0452436	0.615359	0.232387	0.294916	0.119459	0.175398	E3 ubiquitin ligase targeting centromere-binding protein Cse4p; mediates polyubiquitination and degradation of Cse4p; prevents Cse4p from mislocalizing to euchromatin; ubiquitination of Cse4p may be antagonized by Scm3p	NA	protein modification by small protein conjugation or removal_proteolysis involved in cellular protein catabolic process	NA	NA	other	other	0	702
YDL188C	PPH22	-0.0141609	-0.246371	-0.14686	-0.0682173	-0.155704	0.494758	0.169908	0.194328	0.348203	0.538422	Catalytic subunit of protein phosphatase 2A (PP2A); functionally redundant with Pph21p; methylated at C terminus; forms alternate complexes with several regulatory subunits; involved in signal transduction and regulation of mitosis; protein abundance increases in response to DNA replication stress; dephosphorylates Tel1p/Mec1p-phosphorylated Cdc13p to promote telomerase release from telomeres at …	NA	cell budding_chromosome segregation_cytoskeleton organization_mitotic cell cycle_organelle fission_protein dephosphorylation_regulation of cell cycle_regulation of organelle organization_regulation of translation	NA	NA	DNA	other	0	703
YKL128C	PMU1	0.0657099	-0.261158	-0.712198	-0.612012	-1.09501	1.47201	0.315523	0.720612	0.368912	1.04762	Putative phosphomutase; contains a region homologous to the active site of phosphomutases; overexpression suppresses the histidine auxotrophy of an ade3 ade16 ade17 triple mutant and the temperature sensitivity of a tps2 mutant	NA	biological_process	NA	NA	other	other	0	704
YPL268W	PLC1	-0.501631	-0.400024	-0.546107	-0.442286	-0.817723	0.728936	0.358398	0.242604	0.249653	0.259382	Phospholipase C; hydrolyzes phosphatidylinositol 4,5-biphosphate (PIP2) to generate the signaling molecules inositol 1,4,5-triphosphate (IP3) and 1,2-diacylglycerol (DAG); involved in regulating many cellular processes; Plc1p and inositol polyphosphates are required for acetyl-CoA homeostasis which regulates global histone acetylation	NA	lipid metabolic process_signaling	NA	NA	metabolism	other	0	705
YLR151C	PCD1	-0.269331	-0.312643	-0.237336	-0.432897	-0.348688	0.612739	0.281696	0.346521	0.285767	1.00403	8-oxo-dGTP diphosphatase; prevents spontaneous mutagenesis via sanitization of oxidized purine nucleoside triphosphates; can also act as peroxisomal pyrophosphatase with specificity for coenzyme A and CoA derivatives, may function to remove potentially toxic oxidized CoA disulfide from peroxisomes to maintain the capacity for beta-oxidation of fatty acids; nudix hydrolase family member; similar E…	NA	DNA repair_cellular response to DNA damage stimulus_cofactor metabolic process_nucleobase-containing small molecule metabolic process	NA	NA	DNA	other	0	706
YLR335W	NUP2	-0.46013	-0.212166	-0.321388	-0.381617	0.363398	1.0762	0.308893	0.217	0.412403	0.510352	Nucleoporin involved in nucleocytoplasmic transport; binds to either the nucleoplasmic or cytoplasmic faces of the nuclear pore complex depending on Ran-GTP levels; also has a role in chromatin organization	NA	chromatin organization_nuclear transport_nucleobase-containing compound transport_nucleus organization_protein targeting_response to heat	NA	NA	DNA	other	0	707
YOR156C	NFI1	0.199292	-0.283115	-0.104736	-0.351464	-0.530598	0.580116	0.319581	0.423508	0.177833	0.960271	SUMO E3 ligase; catalyzes sumoylation of Yku70p/Yku80p and Sir4p promoting chromatin anchoring; DNA-bound form catalyzes a DNA-damaged triggered sumoylation wave resulting in multisite modification of several DNA repair proteins, enhancing interactions between these proteins and accelerating repair; promotes telomere anchoring to the nuclear envelope; involved in maintenance of proper telomere le…	NA	chromosome segregation_peptidyl-amino acid modification_protein modification by small protein conjugation or removal	NA	NA	DNA	other	0	708
YMR023C	MSS1	-0.276611	-0.0674	0.00572625	-0.159008	0.0275222	0.768082	0.719898	0.202223	0.238304	0.342372	Mitochondrial protein; forms a heterodimer complex with Mto1p that performs the 5-carboxymethylaminomethyl modification of the wobble uridine base in mitochondrial tRNAs; similar to human GTPBP3	Mto1p/Mss1p complex	RNA modification_mitochondrion organization_tRNA processing	NA	NA	RNA	other	0	709
YHR120W	MSH1	-0.865938	-0.798868	-0.50222	-0.526458	-0.0468193	1.20533	0.210711	0.0510968	0.306352	0.317235	DNA-binding protein of the mitochondria; involved in repair of mitochondrial DNA; has ATPase activity and binds to DNA mismatches; has homology to E. coli MutS; transcription is induced during meiosis	NA	DNA repair_cellular response to DNA damage stimulus_mitochondrion organization	NA	NA	DNA	other	0	710
YOR274W	MOD5	0.41585	-0.267144	-0.301957	-0.320251	-0.309492	0.0642613	0.389612	0.0706706	0.273522	0.0690712	Delta 2-isopentenyl pyrophosphate:tRNA isopentenyl transferase; required for biosynthesis of isopentenyladenosine in mitochondrial and cytoplasmic tRNAs; also has a role in tRNA gene-mediated silencing; gene encodes two isozymic forms; converts to a prion form, prion conversion contributes to azole antifungal resistance by upregulating ergosterol biosynthesis; homolog of human TRIT1, a mutation i…	NA	RNA modification_chromatin organization_tRNA processing_transcription from RNA polymerase II promoter	NA	NA	RNA	other	0	711
YKR095W	MLP1	-0.276745	-0.507601	-0.427804	-0.459828	-1.02229	0.62319	0.356423	0.382075	0.147995	0.681167	Myosin-like protein associated with the nuclear envelope; nuclear basket protein that connects the nuclear pore complex with the nuclear interior; involved with Tel1p in telomere length control; involved with Pml1p and Pml39p in nuclear retention of unspliced mRNAs; MLP1 has a paralog, MLP2, that arose from the whole genome duplication	NA	RNA catabolic process_chromatin organization_nuclear transport_nucleobase-containing compound transport_nucleus organization_protein targeting_transcription from RNA polymerase II promoter	NA	NA	RNA	other	0	712
YNL085W	MKT1	-0.390219	-0.53124	-0.578858	-0.488402	-0.572047	0.280478	0.213462	0.223688	0.23529	0.242068	Protein similar to nucleases that forms a complex with Pbp1p; complex may mediate posttranscriptional regulation of HO; involved in propagation of M2 dsRNA satellite of L-A virus; allelic variation affects mitochondrial genome stability, drug resistance, and more; forms cytoplasmic foci upon DNA replication stress; localization to P-bodies under ethanol stress differs between strains	Mtk1p/Pbp1p complex	cellular response to DNA damage stimulus	NA	NA	DNA	other	0	713
YOR330C	MIP1	-1.11906	-0.862163	-0.84869	-1.04935	-1.1378	0.525645	1.07574	0.883257	1.23143	1.71718	Mitochondrial DNA polymerase gamma; single subunit of mitochondrial DNA polymerase in yeast, in contrast to metazoan complex of catalytic and accessory subunits; polymorphic in yeast, petites occur more frequently in some lab strains; human ortholog POLG complements yeast mip1 mutant; mutations in human POLG associated with Alpers-Huttenlocher syndrome (AHS), progressive external ophthalmoplegia …	NA	DNA replication_mitochondrion organization	NA	NA	DNA	other	0	714
YIR033W	MGA2	-0.699469	-0.81778	-0.502584	-0.644942	-1.12769	0.285739	0.154214	0.479884	0.238623	0.40077	ER membrane protein involved in regulation of OLE1 transcription; inactive ER form dimerizes and one subunit is then activated by ubiquitin/proteasome-dependent processing followed by nuclear targeting; MGA2 has a paralog, SPT23, that arose from the whole genome duplication	NA	chromatin organization_lipid metabolic process_monocarboxylic acid metabolic process_response to chemical_transcription from RNA polymerase II promoter	NA	NA	DNA	other	0	715
YIL046W	MET30	0.0110373	-0.85532	-0.684387	-0.678647	-0.558781	0.738873	0.382397	0.767407	0.305466	0.905691	F-box protein containing five copies of the WD40 motif; controls cell cycle function, sulfur metabolism, and methionine biosynthesis as part of the ubiquitin ligase complex; interacts with and regulates Met4p, localizes within the nucleus; dissociation of Met30p from SCF complex in response to cadmium stress is regulated by Cdc48p	NA	DNA replication_mitotic cell cycle_protein modification by small protein conjugation or removal_proteolysis involved in cellular protein catabolic process_regulation of DNA metabolic process_response to chemical	NA	NA	DNA	other	0	716
YJR024C	MDE1	0.114625	-0.0492375	-0.100006	-0.276068	-0.131555	0.623959	0.368313	0.15654	0.111903	0.24233	5'-methylthioribulose-1-phosphate dehydratase; acts in the methionine salvage pathway; potential Smt3p sumoylation substrate; expression downregulated by caspofungin and deletion mutant is caspofungin resistant	NA	cellular amino acid metabolic process	NA	NA	metabolism	other	0	717
YKL110C	KTI12	-0.370042	-0.178929	-0.0495433	-0.292815	-0.388624	1.23952	0.374638	0.315824	0.136226	0.792491	Protein that plays a role in modification of tRNA wobble nucleosides; protein plays role in tRNA wobble nucleoside modification with Elongator complex; involved in sensitivity to G1 arrest induced by zymocin; interacts with chromatin throughout the genome; also interacts with Cdc19p	NA	RNA modification_tRNA processing_transcription from RNA polymerase II promoter	NA	NA	RNA	other	0	718
YDL181W	INH1	-1.21125	-0.646891	-0.71634	-0.585717	-0.79816	1.03376	0.476602	0.904363	0.662663	0.991384	Protein that inhibits ATP hydrolysis by the F1F0-ATP synthase; inhibitory function is enhanced by stabilizing proteins Stf1p and Stf2p; has a calmodulin-binding motif and binds calmodulin in vitro; INH1 has a paralog, STF1, that arose from the whole genome duplication	mitochondrial ATPase inhibitor complex_F0/F1 ATP synthase (complex V)	other	NA	NA	other	other	0	719
YLR113W	HOG1	-0.0620044	-0.266371	-0.34061	-0.411718	-0.829927	0.473278	0.633329	0.971849	0.773308	0.956902	Mitogen-activated protein kinase involved in osmoregulation; controls global reallocation of RNAPII in osmotic shock; activates CDC28 by stimulating antisense RNA transcription; mediates recruitment/activation of RNAPII at Hot1p-dependent promoters; with Mrc1p defines novel S-phase checkpoint that prevent conflicts between DNA replication and transcription; nuclear form represses pseudohyphal gro…	NA	DNA replication_protein phosphorylation_regulation of DNA metabolic process_regulation of cell cycle_response to chemical_response to heat_response to osmotic stress_signaling_transcription from RNA polymerase II promoter	NA	yetfasco	DNA	other	0	720
YGR163W	GTR2	-0.811057	-0.507675	-0.539418	-0.658042	-0.431363	0.899834	0.196837	0.411016	0.641175	0.574229	Subunit of a TORC1-stimulating GTPase complex; subunit of the Gtr1-Gtr2 GTPase complex that stimulates TORC1 in response to amino acid stimulation; stimulates the GTPase activity of Gtr1p; negatively regulates the Ran/Tc4 GTPase cycle; activates transcription; tethered to the vacuolar membrane as part of the EGO complex (EGOC); required for sorting of Gap1p; activated by the the Lst4p-Lst7p GAP c…	EGO complex_GSE Complex	signaling_transcription from RNA polymerase II promoter	NA	NA	DNA	other	0	721
YHR061C	GIC1	-0.0470548	-0.634438	-0.357379	-0.519932	-0.308259	0.344706	0.727432	0.371977	0.27807	0.500296	Protein involved in initiation of budding and cellular polarization; interacts with Cdc42p via the Cdc42/Rac-interactive binding (CRIB) domain; relocalizes from bud neck to nucleus upon DNA replication stress; GIC1 has a paralog, GIC2, that arose from the whole genome duplication	NA	chromatin organization_cytoskeleton organization_mitotic cell cycle_organelle fission_regulation of cell cycle_regulation of organelle organization	NA	NA	DNA	other	0	722
YMR307W	GAS1	-0.835119	-0.719508	-0.120002	-0.351342	0.08469	1.70639	0.75063	0.146208	0.0318015	0.441865	Beta-1,3-glucanosyltransferase; required for cell wall assembly and also has a role in transcriptional silencing; localizes to cell surface via a glycosylphosphatidylinositol (GPI) anchor; also found at nuclear periphery; genetic interactions with histone H3 lysine acetyltransferases GCN5 and SAS3 indicate previously unsuspected functions for Gas1 in DNA damage response and cell cycle regulation	NA	cell wall organization or biogenesis_chromatin organization	NA	NA	DNA	other	0	723
YOR271C	FSF1	-1.28801	-0.834581	-0.475431	-0.587667	-0.63785	1.49418	0.154665	0.213441	0.341533	0.427165	NA	NA	NA	NA	NA	NA	NA	0	724
YDR363W	ESC2	0.660873	-0.171579	-0.128803	-0.383982	-0.473968	0.156807	0.0752472	0.160332	0.590881	0.538218	Sumo-like domain protein; prevents accumulation of toxic intermediates during replication-associated recombinational repair; roles in silencing, lifespan, chromatid cohesion and the intra-S-phase DNA damage checkpoint; RENi family member	NA	DNA recombination_DNA repair_cellular response to DNA damage stimulus_chromatin organization_chromosome segregation_mitotic cell cycle_organelle fission_peptidyl-amino acid modification_protein modification by small protein conjugation or removal_regulation of cell cycle_regulation of protein modification process	NA	NA	DNA	other	0	725
YMR299C	DYN3	-0.479405	-0.64482	-0.655915	-0.659283	-0.488293	0.616312	0.148994	0.484455	0.329356	0.622808	Dynein light intermediate chain (LIC); localizes with dynein, null mutant is defective in nuclear migration	cytoplasmic dynein complex	other	NA	NA	other	other	0	726
YDL101C	DUN1	0.0587108	-0.0570486	-0.22702	-0.125165	-0.22455	1.44404	0.314199	0.254153	0.140144	0.379487	Cell-cycle checkpoint serine-threonine kinase; required for DNA damage-induced transcription of certain target genes, phosphorylation of Rad55p and Sml1p, and transient G2/M arrest after DNA damage; Mec1p and Dun1p function in same pathway to regulate both dNTP pools and telomere length; also regulates postreplicative DNA repair	NA	DNA replication_cellular response to DNA damage stimulus_peptidyl-amino acid modification_protein phosphorylation_regulation of DNA metabolic process_regulation of cell cycle	NA	NA	DNA	other	0	727
[truncated: 28 more rows]

## Sheet: PH_DN
ORF	Name	mn1	mn5	mn12	mn30	mn75	sd1	sd5	sd12	sd30	sd75	Description	CYC2008	slim_term_P	Cramer	yetfasco	GO_cat	complex	fig 2c	nr
[truncated: 755 more rows]

[truncated: 2 more sheets: AZ_UP, AZ_DN]
