# Supplementary material for: Inhibition of transcription leads to rewiring of locus-specific chromatin proteomes
Source: Genome Res. 2020 Apr;30(4):635–46. doi: 10.1101/gr.256255.119 (PMC7197482; doi:10.1101/gr.256255.119)
Supplement: Supplemental Material [file supp_gr.256255.119_Supplemental_Table_S3.xlsx]

## Sheet: README
Supplemental Table S3
Epi-Decoder-HO Chrom-3×BC Q and NQ barcode counts
Mean IP/IN and standard deviations (sd) for cells grown in mid-log, quiescent (Q) or non-quiescent (NQ) states.
The factors used for figures are indicated with sort order and the respective figure numbers
Raw sequencing data and corresponding reference tables have been submitted to the NCBI BioProject database (https://www.ncbi.nlm.nih.gov/bioproject/) under accession number PRJNA610036, and to the the NCBI BioSample database (https://www.ncbi.nlm.nih.gov/biosample/) under accession number SAMN14271072.

## Sheet: BC_UP
ORF	Name	mean_log	mean_Q	mean_NQ	sd_log	sd_Q	sd_NQ	fig5	figS5	group fig 5A	nr
YOR151C	RPB2	4.39506	1.24689	1.00351	1.64845	-0.228354	-1.53456	AB		1	1
YDL140C	RPO21	3.45968	0.587567	0.969033	1.03386	-1.12942	-1.79312	AB		1	2
YOL005C	RPB11	2.83532	0.0262015	0.220745	1.3109	-1.14135	-1.82046	AB		1	3
YIL021W	RPB3	3.82692	0.417543	1.0533	0.464614	-1.23838	-1.06831	AB		1	4
YDR404C	RPB7	2.24387	0.191024	0.120822	-0.454097	-1.16667	-2.53337	AB		1	5
YGR063C	SPT4	3.18865	0.670323	0.63824	0.697561	-1.27087	-1.8739	AB		2	6
YML010W	SPT5	3.19627	1.07492	1.29706	1.08266	-0.493348	-0.89526	AB		2	7
YKL160W	ELF1	2.34981	0.421823	0.337415	-1.05156	-1.43976	-1.6679	AB		2	8
YGL207W	SPT16	2.45543	1.13942	1.73068	-0.211119	-0.877563	-0.318352	AB		2	9
YML069W	POB3	2.07635	1.28696	1.16802	-0.878102	-1.04337	-1.40552	AB		2	10
YPR052C	NHP6A	3.47456	4.88741	4.29757	2.83897	2.9274	2.83197	AB		2	11
YBR089C-A	NHP6B	1.93301	4.70159	3.63855	-1.71364	3.48638	2.39907	AB		2	12
YBR279W	PAF1	0.868737	0.505112	0.48483	-1.3755	-1.07601	-1.94731	AB		2	13
YGL244W	RTF1	1.251	0.202558	0.43839	-1.25503	-1.28731	-1.59262	AB		2	14
YOR123C	LEO1	1.26713	0.602996	1.12943	-0.776676	-1.10377	-1.05587	AB		2	15
YOL145C	CTR9	1.52169	0.913547	0.369093	-1.32225	-0.84417	-2.68011	AB		2	16
YPR133C	SPN1	2.50546	0.888407	0.581898	-0.435138	-0.548897	-1.31894	AB		2	17
YGR116W	SPT6	3.42162	0.941605	0.85706	0.332142	-0.668306	-1.03302	AB		2	18
YGL097W	SRM1	2.68169	3.65423	3.15456	-0.0120924	2.43444	1.19324	AB		2	19
YER063W	THO1	0.0675925	2.41919	1.54472	-1.33945	-0.46447	-0.685835	AB		2	20
YIL101C	XBP1	-0.600615	1.88325	0.774352	-1.72103	1.03023	-0.368723	AC		3	21
YOR052C	TMC1	0.337084	0.61404	0.529816	-1.77382	-1.45214	-1.61696	C			22
YOR230W	WTM1	0.831598	0.515903	0.733398	-1.56693	-0.382974	-1.33273	AC		3	23
YLR182W	SWI6	-0.118712	1.41981	0.638293	-1.72262	-0.0285759	-1.13206	AC		3	24
YEL007W	MIT1	-0.0227479	0.616764	0.223761	-2.11089	-0.824939	-1.69642	AC		3	25
YPL128C	TBF1	0.207698	1.28726	1.98175	-2.41346	-0.385434	-0.485958	AC		3	26
YMR043W	MCM1	0.447426	2.0289	1.73905	-1.86107	0.0833881	-0.144607	AC		3	27
YKL112W	ABF1	0.407172	1.43361	1.24451	-2.05651	-1.03876	-0.717282	AC		3	28
YOR298C-A	MBF1	1.82451	2.35853	1.67952	-0.467509	0.638835	0.461046	AC		3	29
YBR049C	REB1	3.08296	4.28998	3.41312	2.45399	3.1799	2.15375	AC		3	30
YIL131C	FKH1	-0.0422673	0.504773	0.0191037	-1.74013	-1.18864	-2.39814				31
YCR065W	HCM1	-0.490208	-0.410442	-0.231243	-2.34612	-2.16184	-2.74525				32
YNL068C	FKH2	-0.123191	0.148408	-0.147265	-2.30635	-2.14383	-3.22089				33
YNL216W	RAP1	NA	NA	NA	NA	NA	NA				34
YAL051W	OAF1	-0.41875	-0.505177	-0.678494	-2.36879	-2.56571	-3.13658				35
YDL106C	PHO2	-0.507534	0.278657	-0.110039	-2.29219	-1.6433	-3.26878				36
YMR037C	MSN2	-0.481809	-0.246444	0.0446342	-1.88962	-1.55847	-1.77608				37
YER088C	DOT6	-0.253683	-0.402729	-0.455304	-2.52221	-2.28439	-2.50411				38
YMR182C	RGM1	-0.486647	-0.524675	-0.681247	-1.76822	-2.47754	-2.77631				39
YER111C	SWI4	-0.30502	0.0530237	-0.0861051	-1.58468	-1.18482	-2.15091				40
YDR005C	MAF1	-0.0435668	-0.172263	0.059826	-2.39178	-1.88735	-2.2508				41
YML027W	YOX1	-0.279209	-0.271988	-0.611139	-1.87528	-2.14307	-2.60608				42
YDR451C	YHP1	-0.618575	-0.646576	-0.769152	-2.1338	-1.7898	-2.03552				43
YIR018W	YAP5	-0.244036	-0.335922	-0.658067	-1.89617	-2.02086	-2.24315				44
YOR229W	WTM2	0.095631	-0.371518	-0.148021	-1.96403	-1.98004	-2.95554				45
YDR146C	SWI5	-0.557085	-0.681466	-0.55694	-2.20097	-1.8935	-1.67763				46
YDR463W	STP1	-0.227853	-0.367268	-0.454389	-2.73558	-1.90617	-2.70245				47
YMR179W	SPT21	-0.00721956	-0.473659	-0.500417	-1.90072	-2.69701	-2.03101				48
YPR065W	ROX1	-0.415931	0.20598	-0.248825	-2.50232	-1.85276	-2.0994				49
YKL032C	IXR1	-0.120124	-0.502274	-0.450634	-2.51693	-2.31339	-2.79095				50
YPL075W	GCR1	-0.402019	-0.25379	-0.239676	-2.76793	-2.36581	-3.09393				51
YEL009C	GCN4	-0.721295	-0.594285	-0.632363	-2.50439	-2.60963	-2.77674				52
YBR239C	ERT1	NA	NA	NA	NA	NA	NA				53
YGL071W	AFT1	-0.101289	-0.18458	-0.112082	-2.39213	-2.52478	-2.07277				54
YDR216W	ADR1	-0.410979	-0.327091	-0.133651	-3.49609	-2.11001	-2.41692				55
YER159C	BUR6	1.12959	1.91592	1.68383	-0.849599	-0.260232	-0.0920029	AC		3	56
YDR397C	NCB2	0.913152	1.30125	0.844289	-0.904999	-1.19104	-1.35283	AC		3	57
YNL330C	RPD3	-0.415158	1.50709	1.13635	-2.27926	-0.217974	-0.441042	AC		3	58
YOL004W	SIN3	-0.176857	1.95796	1.54461	-2.71852	0.490408	-0.12075	AC		3	59
YPL139C	UME1	0.055828	2.0264	1.92125	-1.8187	0.449141	0.0293974	AC		3	60
YMR053C	STB2	-0.713278	-0.694174	-0.756664	-2.70617	-2.40555	-2.6517				61
YGL131C	SNT2	-0.545544	-0.462155	-0.471917	-2.78142	-2.18426	-3.66584				62
YMR176W	ECM5	-0.345512	-0.13473	-0.432089	-1.85122	-1.51302	-1.92205				63
YKL185W	ASH1	-0.270828	-0.400143	-0.442632	-2.29494	-2.95277	-1.87336				64
YIL084C	SDS3	-0.692824	-0.683009	-0.387188	-1.98638	-2.96165	-3.04278				65
YMR263W	SAP30	-0.203219	1.39243	0.814069	-2.52739	-0.107043	-1.337	AC		3	66
YNL097C	PHO23	-0.126627	1.47969	0.824354	-2.2877	-0.267498	-0.646359	AC		3	67
YBR095C	RXT2	0.865565	0.950112	0.74868	0.930099	-0.381596	-0.357484	AC		3	68
YDL076C	RXT3	-0.61932	0.902603	0.868522	-2.69996	-1.06801	-0.979004	AC		3	69
YPL181W	CTI6	-0.26991	0.814256	0.540431	-2.10513	-1.08357	-1.5297	AC		3	70
YDR207C	UME6	-0.271032	0.846352	0.425044	-1.60069	-0.180722	-1.61107	AC		3	71
YMR075W	RCO1	-0.121822	-0.103686	0.260541	-2.27201	-2.29441	-2.57378				72
YPR023C	EAF3	-0.225494	-0.204683	-0.933603	-1.58047	-2.29561	-2.99534				73
YPL127C	HHO1	0.262944	1.95764	2.07057	-1.14639	0.449458	-0.192668	AC		3	74
YDR174W	HMO1	2.27529	3.28347	2.66407	2.40445	2.4156	1.89003	AC		3	75
YER161C	SPT2	0.926628	0.0176509	-0.155875	-2.06705	-1.61582	-2.03761	AC		3	76
YPL082C	MOT1	0.938492	1.05902	0.434862	-1.5608	0.14104	-2.0166	A		3	77
YMR039C	SUB1	1.26567	0.691627	0.760526	-2.05761	-1.42744	-1.8864	A		3	78
YLR226W	BUR2	0.948497	0.197932	0.257691	-2.29157	-1.57494	-2.59728	A		3	79
YPR161C	SGV1	-0.0505813	-0.329689	-0.178658	-2.07617	-2.15295	-3.33482	A		3	80
YCR084C	TUP1	0.517341	0.773686	1.6001	-1.27644	-1.09133	-0.371802	A		3	81
YBR112C	CYC8	0.0396726	0.365209	0.71736	-2.36679	-1.27473	-1.10186	A		3	82
YKL005C	BYE1	0.260445	0.147792	-0.254183	-0.154147	-1.3742	-2.05525	A		3	83
YKL058W	TOA2	-0.423292	-0.576494	-0.832497	-2.92679	-3.30432	-3.27216				84
YPR086W	SUA7	2.42317	0.377488	0.464898	-0.753768	-1.24296	-0.589192	A		4	85
YDR167W	TAF10	-0.583715	-0.459067	-0.818076	-2.36857	-2.0525	-3.46057				86
YDL070W	BDF2	-0.0990475	-0.196019	-0.275698	-2.33047	-2.4059	-2.58956				87
YML098W	TAF13	0.00878723	0.374785	0.493559	-1.57911	-2.17052	-1.88294	A		4	88
YDR145W	TAF12	0.610258	0.78047	1.32007	-1.97509	-1.36943	-2.17405	A		4	89
YGR274C	TAF1	0.328047	0.579044	0.716542	-1.84647	-0.745206	-1.05977	A		4	90
YCR042C	TAF2	0.588719	0.600557	0.231045	-0.943547	-0.729759	-3.12801	A		4	91
YPL011C	TAF3	0.482821	0.355729	0.390412	-1.83404	-1.83876	-2.58402	A		4	92
YMR005W	TAF4	0.334391	0.590594	0.681227	-1.68319	-0.620655	-2.22672	A		4	93
YBR198C	TAF5	3.05977	2.69721	1.80521	3.42721	3.57395	1.35434	A		4	94
YGL112C	TAF6	0.969611	0.923879	1.68744	-1.87895	-0.413103	-0.194313	A		4	95
YMR227C	TAF7	0.494234	0.328979	0.531848	-1.18517	-1.29174	-2.00622	A		4	96
YML114C	TAF8	0.386864	0.194878	0.247591	-1.67798	-2.01487	-1.86287	A		4	97
YMR236W	TAF9	1.00176	0.831663	1.56357	-2.12328	-1.17192	-0.537021	A		4	98
YLR399C	BDF1	1.31463	2.17876	2.3687	-1.45877	0.619932	-0.26415	A	E	4	99
YPL129W	TAF14	0.305148	0.243776	0.049424	-0.0127315	-1.49653	-2.02068				100
YKL028W	TFA1	1.79078	0.376134	0.138079	-1.25149	-1.49826	-3.57242	A	E	4	101
YKR062W	TFA2	2.29837	0.965364	0.609511	0.102209	-0.149209	-2.75899	A	E	4	102
YGR005C	TFG2	-0.434468	-0.243779	-0.553629	-2.01366	-1.2853	-2.56254				103
YGR186W	TFG1	1.83069	0.14421	0.530901	-1.14257	-2.62561	-1.4403	A		4	104
YOR352W	TFB6	-0.581341	0.0156812	-0.0337365	-2.35702	-1.66196	-3.53087				105
YDR311W	TFB1	NA	NA	NA	NA	NA	NA				106
YDR079C-A	TFB5	0.893797	-0.366753	-0.594204	-0.203506	-1.75975	-2.72437	A		4	107
YIL143C	SSL2	1.88048	-0.144527	0.0524593	-1.20487	-2.12138	-1.37958	A	E	4	108
YLR005W	SSL1	2.64865	-0.102263	0.385209	0.112937	-3.17052	-1.70813	A	E	4	109
YPR025C	CCL1	1.62254	0.0586654	-0.00631575	-0.111743	-1.95995	-2.38776	A		4	110
YER171W	RAD3	2.03729	-0.0809146	0.0921091	-1.74133	-2.08039	-4.18258	A	E	4	111
YDL108W	KIN28	1.46413	-0.121026	0.152884	-0.722838	-1.97453	-2.23684	A		4	112
YPL122C	TFB2	1.70677	0.587573	0.784828	0.991254	0.0871306	0.225358	A	E	4	113
YDR460W	TFB3	1.68737	-0.0810195	0.443118	-0.864545	-2.43434	-1.9045	A	E	4	114
YPR056W	TFB4	2.07485	0.0723285	0.0347244	-0.667401	-2.01387	-2.27532	A	E	4	115
YAL001C	TFC3	-0.323996	0.17292	0.351171	-2.12662	-1.98368	-1.29116				116
YGL122C	NAB2	0.574494	2.51697	1.96584	-1.62817	0.611648	0.571647	A	D	5	117
YGL044C	RNA15	-0.0858162	-0.0626331	-0.265773	-2.28749	-1.7881	-1.79678	A	D	5	118
YOR048C	RAT1	0.211323	0.0275385	-0.305864	-1.38595	-1.4122	-3.29648	A	D	5	119
YNL251C	NRD1	1.31494	0.531926	0.882683	-0.542908	-1.1052	-1.46874	A	D	5	120
YPL190C	NAB3	1.0291	0.427069	0.527821	-1.81126	-1.57539	-2.53417	A	D	5	121
YER165W	PAB1	-0.245049	-0.165313	-0.326262	-1.53641	-2.00303	-1.75315				122
YNL016W	PUB1	-0.199498	0.280146	0.0165864	-1.48059	-1.76556	-2.43571	A	D	5	123
YCL011C	GBP2	-0.311413	-0.468156	-0.335836	-2.32138	-2.19075	-3.15757	A	D	5	124
YNL004W	HRB1	0.281425	0.0298077	-0.0843228	-2.12293	-1.49015	-2.45171	A	D	5	125
YKL018W	SWD2	-0.528827	-0.365484	-0.163871	-1.95503	-1.60498	-1.88086				126
YNL112W	DBP2	1.11241	-0.323139	-0.227009	-0.648615	-1.58713	-1.80359	A	D	5	127
YDR289C	RTT103	-0.2442	0.183731	-0.377245	-2.49572	-1.40504	-3.03928	A	D	5	128
YDR228C	PCF11	-0.41517	-0.152245	-0.0513449	-2.24878	-2.75882	-1.47598	A	D	5	129
YMR061W	RNA14	-0.00704448	-0.26358	-0.213783	-1.83076	-1.72369	-1.88599	A	D	5	130
YLR115W	CFT2	-0.185844	-0.275086	-0.181538	-2.06018	-2.35288	-1.88762	A	D	5	131
YDR195W	REF2	-0.0556086	0.0742996	0.189339	-1.46047	-1.82899	-2.03896	A	D	5	132
YNL317W	PFS2	-0.19149	0.027854	0.0757966	-2.00416	-2.52989	-1.91545	A	D	5	133
YLR277C	YSH1	-0.22965	-0.157838	0.229883	-1.34506	-2.19194	-1.54991	A	D	5	134
YGR156W	PTI1	0.057449	-0.137319	0.0856461	-1.97685	-1.70625	-2.18108	A	D	5	135
YKR002W	PAP1	0.161866	0.57584	0.856867	-1.67901	-2.22372	-0.79169	A	D	5	136
YJR093C	FIP1	-0.269385	0.0449921	-0.173316	-3.00138	-2.28493	-3.00952	A	D	5	137
YDR301W	CFT1	-0.0836631	-0.314141	-0.173658	-2.55036	-2.67724	-3.67169	A	D	5	138
YPR107C	YTH1	-0.219302	-0.035263	0.0759352	-2.33935	-1.9308	-1.51197	A	D	5	139
YKL059C	MPE1	-0.0191806	0.206933	0.0871317	-1.95917	-0.606795	-2.85718	A	D	5	140
YLR430W	SEN1	0.222253	-0.0778845	-0.318144	-1.37122	-2.04306	-2.31505	A	D	5	141
YOR179C	SYC1	-0.114793	-0.0130401	-0.105245	-1.91181	-1.95296	-2.48126	A	D	5	142
YJL006C	CTK2	0.0864279	0.155501	0.0116006	-1.5469	-1.6015	-2.67652				143
YKL139W	CTK1	-0.135024	-0.320552	-0.241121	-1.83105	-2.53133	-2.28209				144
YDR443C	SSN2	0.0558651	-0.282882	-0.150222	-1.24975	-1.78579	-1.24996				145
YCR081W	SRB8	-0.355908	-0.55956	-0.694017	-2.06149	-2.36349	-3.14953				146
YDR308C	SRB7	-0.373145	-0.353583	-0.345196	-2.11715	-2.71054	-2.67662				147
YBR253W	SRB6	-0.331325	-0.172231	-0.369045	-2.19507	-1.93044	-2.24972				148
YGR104C	SRB5	-0.681888	-0.168458	-0.591769	-2.50304	-2.4787	-3.15228				149
YER022W	SRB4	-0.0718308	-0.391692	-0.295382	-2.00867	-2.38814	-1.95647				150
YHR041C	SRB2	-0.361209	-0.400399	-0.622715	-2.22683	-2.35493	-2.52473				151
YGL127C	SOH1	-0.154749	-0.109846	-0.130385	-1.96606	-1.41744	-2.58854				152
YNL236W	SIN4	-0.025056	-0.239889	-0.0810925	-2.29279	-1.87643	-1.84334				153
YBL093C	ROX3	0.157931	-0.224447	-0.00826011	-2.34075	-2.21273	-2.63246				154
YLR071C	RGR1	0.0663214	-0.0697185	-0.251985	-1.81625	-1.43148	-3.05574				155
YGL025C	PGD1	-0.0577006	-0.150638	-0.115702	-2.12716	-2.57899	-2.12859				156
YPR168W	NUT2	0.077193	-0.370505	-0.100521	-2.27168	-1.75792	-2.82224				157
YGL151W	NUT1	0.188068	0.198845	-0.0136679	-2.60607	-0.853823	-2.51613				158
YBR193C	MED8	-0.303651	-0.216576	-0.230572	-1.98067	-2.35555	-2.2154				159
YOL135C	MED7	0.0201337	-0.33368	-0.463027	-2.00613	-2.29321	-1.84043				160
YHR058C	MED6	-0.210883	-0.291581	-0.12653	-2.48516	-1.90403	-1.52929				161
YOR174W	MED4	0.172085	-0.244353	0.299732	-2.0526	-2.3207	-2.72803				162
YDL005C	MED2	0.142568	-0.0589713	-0.326626	-1.31512	-2.47209	-1.58894				163
YMR112C	MED11	-0.329703	-0.558748	-0.540535	-2.46347	-2.75848	-2.77999				164
YPR070W	MED1	-0.232706	-0.469982	-0.56184	-2.10512	-2.12271	-2.35981				165
YOL051W	GAL11	0.313657	-0.220713	-0.023494	-0.962222	-2.40691	-3.06486				166
YNR010W	CSE2	-0.0759412	-0.354095	-0.29603	-2.02524	-1.84605	-2.14289				167
YPR045C	THP3	-0.364652	-0.0782624	-0.180979	-2.90052	-2.25246	-3.17411				168
YNR052C	POP2	-0.440788	-0.553911	-0.943387	-2.2718	-2.07468	-2.76218				169
YAL021C	CCR4	-0.254231	-0.360232	-0.427932	-2.26726	-1.76723	-2.7469				170
YFL023W	BUD27	-0.437655	-0.425655	-0.499364	-2.89403	-2.48945	-1.95731				171
YLR141W	RRN5	-0.314758	-0.586949	-0.624219	-2.35508	-2.17638	-1.98137				172
YDR026C	NSI1	-0.403873	-0.483457	-0.689355	-2.32498	-2.48349	-2.53596				173
YOR295W	UAF30	-0.490763	-0.505357	-0.804525	-1.94587	-2.33786	-2.73595				174
YNL025C	SSN8	-0.969648	-0.619535	-0.818737	-2.49072	-2.11748	-2.45487				175
YJR136C	TTI2	-0.563585	-0.200952	-0.344858	-2.0421	-2.41772	-3.21867				176
YKL033W	TTI1	-0.511658	-0.238996	-0.513265	-2.73225	-1.79684	-2.56121				177
YGR099W	TEL2	-0.269889	-0.43828	-0.644183	-2.25311	-2.99428	-2.63684				178
YER164W	CHD1	-0.0694851	-0.369603	-0.161023	-3.25345	-2.27064	-2.53839				179
YAL019W	FUN30	0.0329705	-0.0745157	-0.293936	-2.4479	-1.34803	-3.59036	A		6	180
YNL059C	ARP5	0.326879	0.957741	0.909234	0.0620701	-0.978117	-1.02688	A	F	6	181
YOR141C	ARP8	0.135754	1.88477	1.38706	-1.5494	-0.62534	-0.43359	A	F	6	182
YDR190C	RVB1	1.33469	1.45651	1.3273	-1.07176	-0.444833	-0.65285	A	F	6	183
YPL235W	RVB2	0.101219	0.885504	0.540375	-2.21273	-1.25589	-1.9669	A	F	6	184
YEL044W	IES6	0.291181	1.57741	1.29353	-2.05698	-0.595423	-1.24409	A	F	6	185
YER092W	IES5	-0.0762069	1.41381	0.502118	-1.55106	-1.01827	-1.92832	A	F	6	186
YLR052W	IES3	-0.240682	1.76754	0.863071	-2.65719	-0.821644	-1.36574	A	F	6	187
YDL002C	NHP10	0.0531657	2.33866	1.61179	-2.59716	1.97511	0.882564	A	F	6	188
YGL150C	INO80	0.176191	1.06941	0.597827	-1.8438	-1.16659	-1.5567	A	F	6	189
YFL013C	IES1	0.0536024	0.715329	0.469755	-1.73153	-1.26694	-2.91339	A	F	6	190
YNL215W	IES2	0.0103396	0.452285	0.0209466	-2.3837	-0.898323	-3.41929	A	F	6	191
YJL081C	ARP4	-0.24308	1.87677	1.23995	-2.3315	0.0394805	-1.14417	A	F	6	192
YOR189W	IES4	0.0844238	1.10193	0.354655	-1.70275	-0.378283	-2.66701	A	F	6	193
YBR245C	ISW1	NA	NA	NA	NA	NA	NA				194
YFR013W	IOC3	0.0183266	0.766598	0.578876	-1.37408	-1.1644	-1.30389	A	F	6	195
YMR044W	IOC4	0.298434	1.09762	1.47795	-1.63163	-0.826384	-0.82904	A	F	6	196
YLR095C	IOC2	0.207625	0.628322	0.888244	-1.88066	-2.22071	-1.17786	A	F	6	197
YGL133W	ITC1	-0.191446	0.898472	0.475489	-1.65971	0.0570333	-1.80249	A		6	198
YJL065C	DLS1	-0.368506	0.259307	0.288115	-2.24431	-1.78779	-2.38015	A		6	199
YOR304W	ISW2	-0.345076	0.239369	0.398963	-1.71786	-2.50104	-1.961	A		6	200
YKR008W	RSC4	-0.59905	-0.507923	-0.827324	-2.67959	-2.5404	-2.70026				201
YDR303C	RSC3	0.278012	2.48528	1.71947	-1.72023	0.159914	-0.940407	A	F	6	202
YML127W	RSC9	0.642096	2.41729	2.48933	-1.89013	0.714218	-1.26499	A	F	6	203
YMR091C	NPL6	0.690992	2.09467	2.2852	-1.77412	-0.348833	0.152595	A	F	6	204
YIL126W	STH1	0.212033	2.15558	1.99736	-1.28911	-0.229094	-0.0300269	A	F	6	205
YFR037C	RSC8	0.769317	2.86813	2.51531	-1.34882	1.47179	0.404489	A	F	6	206
YCR020W-B	HTL1	0.628809	2.41071	2.25312	-2.0931	-0.593728	-0.437139	A	F	6	207
YLR321C	SFH1	0.412428	2.25023	2.14119	-2.29412	-0.569691	-0.196958	A	F	6	208
YLR357W	RSC2	0.15561	2.73062	2.37017	-1.65443	0.772942	-1.63942	A	F	6	209
YGR056W	RSC1	-0.0281053	1.41947	1.09864	-1.88051	-1.3773	-1.42131	A	F	6	210
YLR033W	RSC58	-0.0598277	2.2399	2.35581	-3.10996	1.31806	0.228921	A	F	6	211
YCR052W	RSC6	0.311834	1.55071	1.78681	-1.61717	-0.63858	-0.0255553	A	F	6	212
YMR033W	ARP9	-0.54375	-0.307996	-0.50709	-2.58848	-2.63871	-1.79406				213
YPR034W	ARP7	0.450527	1.71606	1.9901	-1.99279	-0.207744	-0.148114	A	F	6	214
YGR275W	RTT102	0.0460864	1.47398	1.2008	-2.67079	-0.747698	-0.935029	A	F	6	215
YPL016W	SWI1	-0.378109	0.0540333	0.178052	-3.09499	-2.04923	-2.06641				216
YHL025W	SNF6	-0.216162	0.038624	0.164204	-2.1365	-1.67243	-1.3445				217
YOR290C	SNF2	0.0165085	-0.125523	0.175352	-2.24469	-2.54614	-2.02395				218
YJL176C	SWI3	-0.0610824	-0.14406	0.486606	-2.28397	-1.86669	-1.95067				219
YLR385C	SWC7	0.0664374	-0.156067	-0.177084	-1.26767	-2.69379	-2.28449				220
YBR231C	SWC5	-0.123138	0.172467	0.106716	-2.20948	-2.28722	-2.83502				221
YLR085C	ARP6	-0.714629	-0.111058	-0.806857	-1.82995	-2.40473	-2.16465				222
YAL011W	SWC3	-0.15651	0.710777	0.348814	-1.79651	-0.662233	-1.98124				223
YDR485C	VPS72	-0.505026	-0.0467445	-0.0860847	-2.52821	-2.21703	-2.17381				224
YML041C	VPS71	0.0305135	-0.0030825	0.0343813	-1.35721	-3.30098	-3.75932				225
YDR334W	SWR1	-0.00553346	-0.100084	0.161121	-2.31819	-2.09317	-1.7278				226
YGR002C	SWC4	-0.113266	0.294807	0.345944	-2.13731	-1.55328	-2.1388				227
YPL055C	LGE1	0.136799	-0.0560658	-0.24952	-2.04573	-1.82228	-2.98777				228
YDL074C	BRE1	0.322379	0.264262	0.0975069	-0.788415	-1.03252	-1.66571				229
YDR440W	DOT1	-0.10043	-0.445005	-0.264844	-2.12968	-2.33069	-2.92025				230
YLL022C	HIF1	-0.52951	-0.47229	-0.394692	-2.23994	-1.60602	-3.36003				231
YPR179C	HDA3	-0.290793	-0.184076	0.0342047	-1.91837	-1.85886	-2.7205				232
YDR295C	HDA2	-0.254813	-0.254879	-0.0953538	-1.71165	-2.04654	-2.98208				233
YNL021W	HDA1	0.0482522	-0.0819082	0.079523	-1.4846	-2.07791	-3.21098				234
YDR266C	HEL2	0.0329891	-0.107979	0.144215	-2.14273	-1.56981	-1.81029				235
YKR017C	HEL1	-0.473129	-0.103601	-0.512307	-1.54979	-2.33546	-3.52369				236
YPL116W	HOS3	-0.549158	-0.75939	-0.362533	-1.50222	-3.64014	-1.77982				237
YPR068C	HOS1	-0.520619	-0.3207	-0.831932	-2.76945	-2.0002	-2.82539				238
YDR191W	HST4	-0.47283	-0.581158	-0.70065	-1.77215	-2.78232	-2.79461				239
YOR025W	HST3	-0.262438	-0.293362	-0.367393	-1.86659	-2.19853	-4.16338				240
YPL015C	HST2	-0.442112	-0.259362	-0.497724	-2.15357	-1.71727	-1.34888				241
YER169W	RPH1	-0.285448	0.307389	-0.127079	-2.35938	-1.61833	-3.37564				242
YJR119C	JHD2	-0.077222	-0.248891	-0.515062	-1.85634	-2.13727	-2.64609				243
YER051W	JHD1	-0.341222	-0.631221	-0.500588	-2.98902	-2.43012	-2.19156				244
YDR096W	GIS1	-0.429882	0.484926	0.413906	-2.3901	-1.31674	-1.84462				245
YBL052C	SAS3	-0.432105	0.0718745	0.14216	-2.31723	-1.92878	-2.34987				246
YPR031W	NTO1	-0.0469202	0.248829	0.0220325	-2.56288	-1.86858	-2.14631	A		6	247
YLR455W	PDP3	0.197017	0.0478306	-0.194107	-1.13844	-1.81403	-2.20298	A		6	248
YOR064C	YNG1	-0.0375759	0.0984787	0.191277	-2.08182	-1.87626	-1.8102	A		6	249
YHR090C	YNG2	-0.0648294	-0.587163	-0.267098	-1.88113	-1.97548	-2.3832				250
YNL107W	YAF9	-0.327875	-0.433641	-0.642828	-1.67481	-2.92923	-3.354				251
YOR244W	ESA1	0.2012	0.236796	0.219802	-1.86247	-1.70694	-2.82104				252
YFL024C	EPL1	-0.0133662	-0.151368	-0.117774	-1.99707	-2.22542	-3.14724				253
YNL136W	EAF7	-0.167287	0.0645975	-0.220624	-2.08688	-2.60852	-1.86232				254
YEL018W	EAF5	-0.0584646	0.228989	0.373555	-2.19365	-2.00552	-2.52724				255
YJR082C	EAF6	-0.212519	0.452351	0.149188	-2.25438	-1.6731	-1.12087	A		6	256
YMR231W	PEP5	-0.416304	-0.458733	-0.594214	-2.39813	-2.20609	-2.24956				257
YDR075W	PPH3	-0.199466	-0.288769	-0.386488	-1.97101	-1.88327	-2.78641				258
YNL201C	PSY2	-0.567075	-0.0256897	-0.329826	-3.00779	-2.12623	-3.39787	A		6	259
YGL194C	HOS2	-0.491626	-0.13482	0.0849943	-1.55515	-2.17267	-2.02052				260
YMR223W	UBP8	-0.264251	-0.044011	-0.159009	-2.81681	-2.44281	-2.27535				261
YLR055C	SPT8	-0.182085	0.155344	0.0809435	-2.24266	-1.81683	-2.7518				262
YBR081C	SPT7	0.0221352	-0.210735	0.0194541	-2.40836	-2.02762	-2.46745				263
YDR392W	SPT3	0.162308	-0.109937	0.00991691	-1.71254	-2.02926	-3.04049				264
YOL148C	SPT20	-0.138645	0.0915472	0.146052	-2.12709	-2.10401	-2.31264				265
YGL066W	SGF73	-0.235579	0.0279275	0.351148	-2.11921	-1.39041	-1.12279				266
YCL010C	SGF29	-0.0340056	-0.0318127	-0.0496469	-2.03889	-1.95747	-2.54015				267
YPL047W	SGF11	-0.0504777	-0.0248889	0.056545	-2.16685	-2.05857	-3.4642				268
YDR176W	NGG1	-0.0930949	0.168953	0.2216	-2.29542	-1.37027	-1.40791				269
YPL254W	HFI1	-0.368487	-0.116766	0.407222	-2.87275	-2.57522	-2.26814				270
YGR252W	GCN5	0.0319683	0.0854247	0.128968	-1.54023	-1.47387	-1.59844				271
YCR082W	AHC2	-0.0404984	-0.505285	-0.6888	-2.5572	-2.54665	-2.3784				272
YOR023C	AHC1	-0.0748787	-0.153268	-0.224212	-2.17862	-1.70059	-3.10997				273
YDR448W	ADA2	-0.133624	0.101817	0.310556	-2.20359	-1.61855	-0.939366				274
YOR213C	SAS5	-0.555735	-0.364951	-0.419633	-2.52527	-1.90649	-2.00856				275
YDR181C	SAS4	-0.339161	-0.0514484	-0.376965	-2.85102	-2.08208	-2.09214				276
YMR127C	SAS2	-0.485903	-0.313409	-0.507323	-2.2381	-2.75814	-2.47081				277
YBR175W	SWD3	-0.481569	-0.540197	-0.309686	-1.57034	-2.62462	-2.09018				278
YAR003W	SWD1	-0.268006	-0.286783	-0.240651	-2.94198	-2.15024	-1.93419				279
YPL138C	SPP1	-0.201948	-0.357135	-0.459804	-2.12819	-2.31163	-1.85252				280
YBR258C	SHG1	-0.296466	-0.121566	-0.638106	-2.12045	-1.72955	-3.01328				281
YHR119W	SET1	-0.14793	-0.489074	-0.474057	-1.4115	-2.29711	-3.71943				282
YDR469W	SDC1	-0.0384373	-0.407155	-0.401571	-1.56048	-1.72388	-1.89103				283
YLR015W	BRE2	-0.320917	-0.237813	-0.470793	-0.976395	-2.07127	-1.864				284
YJL168C	SET2	-0.0371818	-0.629613	-0.283147	-1.8957	-2.47409	-3.23023				285
YCR033W	SNT1	-0.363261	-0.179505	0.120815	-1.75993	-2.06748	-2.05042				286
YBR103W	SIF2	-0.324363	0.237748	0.242389	-2.27255	-2.0926	-2.09597				287
YKR029C	SET3	-0.212312	-0.0532933	0.0143193	-1.43968	-1.76782	-3.31393				288
YIL112W	HOS4	-0.425174	-0.0358133	-0.321361	-2.14001	-2.03116	-2.4761				289
YHR207C	SET5	-0.366271	-0.230199	-0.530305	-2.26392	-1.70023	-1.8562				290
YDR227W	SIR4	-0.415393	-0.277571	-0.316433	-1.95474	-1.67916	-1.85664				291
YDL042C	SIR2	-0.476514	-0.306325	-0.356317	-1.72601	-3.28732	-2.25693				292
YLR442C	SIR3	-0.342899	0.372304	0.327597	-2.13307	-0.209864	-1.80203	A		6	293
YJL127C	SPT10	-0.320316	-0.458811	-0.163257	-2.69925	-2.36935	-1.79241				294
YOR279C	RFM1	-0.45509	0.903574	0.243806	-2.28212	-1.00091	-2.21645				295
YOL068C	HST1	0.262244	0.475325	-0.0316457	0.14224	-0.381317	-2.71777	A		6	296
YDR310C	SUM1	0.507773	1.89261	1.0045	-1.08841	-1.55556	-0.268338	A		6	297
YNL186W	UBP10	-0.290094	-0.178971	-0.544433	-2.09081	-1.88633	-2.2542				298
YPR018W	RLF2	-0.175263	-0.287858	-0.424044	-2.23663	-2.47349	-2.34284				299
YML102W	CAC2	-0.303197	-0.658097	-0.261602	-1.85211	-2.99913	-2.23157				300
YBR195C	MSI1	-0.394272	-0.298634	-0.246367	-1.78297	-2.1584	-3.01257	A		6	301
YER030W	CHZ1	NA	-0.142089	-0.293928	NA	-2.06004	-3.66712				302
YJR140C	HIR3	-0.440909	-0.197743	-0.160027	-2.513	-2.86297	-1.98604	A		6	303
YBR215W	HPC2	-0.293902	-0.359411	-0.199426	-2.09269	-2.40562	-2.67874	A		6	304
YOR038C	HIR2	-0.149125	-0.243492	-0.151265	-2.0751	-1.99135	-2.72648	A		6	305
YBL008W	HIR1	-0.327975	-0.0759752	-0.172914	-1.71633	-1.18555	-3.11022	A		6	306
YKR048C	NAP1	-0.482112	0.0263272	-0.399013	-2.35582	-2.17679	-2.15758				307
YPL153C	RAD53	-0.182038	0.0129137	-0.333005	-1.57838	-1.63574	-2.76242				308
YJL115W	ASF1	0.31312	0.377962	0.464714	-2.74189	-1.36873	-1.86148	A		6	309
YNL206C	RTT106	-0.0763171	0.0435591	0.182161	-1.90296	-1.61791	-1.49689	A		6	310
YNL246W	VPS75	0.148568	-0.0151809	0.176561	-1.81145	-2.43242	-2.21369				311
YLL002W	RTT109	-0.192053	-0.154653	-0.249062	-2.09089	-2.46974	-2.45493				312
YER177W	BMH1	0.49718	0.907112	1.52733	-1.74584	-0.688688	0.198865	A			313
YDR099W	BMH2	0.207847	0.972502	0.843897	-1.64496	-0.751511	-1.32738	A			314
YGL240W	DOC1	-0.858434	-0.598014	-0.546295	-2.11318	-2.37836	-3.14983				315
YFR036W	CDC26	-0.255031	-0.353795	-0.408294	-2.33681	-2.01585	-1.74494				316
YKL022C	CDC16	-0.506268	-0.347262	-0.2538	-2.90854	-1.95085	-1.78512				317
YGL060W	YBP2	-0.437852	-0.612575	-0.500328	-3.34716	-3.74787	-2.47904				318
YMR117C	SPC24	-0.402965	-0.417821	-0.800629	-2.63978	-1.80424	-2.57549				319
YDL139C	SCM3	NA	NA	NA	NA	NA	NA				320
YDR318W	MCM21	-0.787714	-0.754004	-0.796432	-2.91001	-2.23677	-2.56454				321
YDR532C	KRE28	NA	NA	NA	NA	NA	NA				322
YPL209C	IPL1	-0.575775	-0.409599	-0.441784	-2.35515	-2.28305	-2.39432				323
YIR010W	DSN1	-0.27335	-0.829973	-0.684683	-1.88599	-1.6721	-1.94117				324
YLR223C	IFH1	0.111234	0.0465688	-0.314348	-0.902955	-1.46071	-1.57535				325
YOL104C	NDJ1	-0.442722	-0.521844	-0.612924	-2.08387	-2.73606	-2.63208				326
YBR057C	MUM2	-0.548049	-0.405045	-0.431776	-2.01759	-3.6461	-2.45695				327
YDR439W	LRS4	-0.313524	-0.337964	-0.424081	-2.1813	-2.04518	-3.24937				328
YPL204W	HRR25	-0.386909	-0.0109195	-0.0164311	-1.6733	-1.87765	-3.37717				329
YCR086W	CSM1	-0.497423	-0.696795	-0.7189	-1.9214	-2.05156	-2.81318				330
YDL116W	NUP84	-0.00768197	-0.3411	-0.0991888	-0.81958	-1.82284	-2.6903				331
YAR002W	NUP60	-0.670993	-0.560763	-0.473391	-2.47268	-2.32483	-2.85389				332
YBL079W	NUP170	-0.155164	-0.518267	-0.931907	-1.78411	-2.24893	-2.46382				333
YGL092W	NUP145	-0.790866	-0.427754	-0.409642	-2.19174	-2.00782	-2.55595				334
YKR082W	NUP133	-0.172292	-0.405443	-0.509768	-1.7986	-2.75231	-2.6878				335
YIL122W	POG1	-0.438061	-0.211454	-0.266082	-2.39891	-2.10267	-3.28386				336
YJL076W	NET1	-0.474255	-0.0309447	0.115106	-1.83509	-1.28939	-2.73129				337
YFR028C	CDC14	-0.800123	-0.189391	-0.0562374	-2.66198	-1.67911	-1.55221				338
YBR275C	RIF1	-0.151059	-0.489286	-0.483231	-1.59257	-2.29525	-2.55088				339
YLR453C	RIF2	-0.400863	-0.366415	-0.192541	-2.40625	-2.33096	-2.25513				340
YIL132C	CSM2	-0.500831	-0.390632	-0.49774	-2.82919	-2.90448	-2.17589				341
YLR383W	SMC6	-0.0164699	-0.347984	-0.653285	-1.68732	-2.53078	-2.94534				342
YOL034W	SMC5	-0.317264	-0.262158	-0.411757	-1.36097	-1.51697	-2.44531				343
YML023C	NSE5	-0.377401	-0.280911	-0.339537	-1.96659	-2.17309	-2.3243				344
YDL105W	NSE4	-0.60811	-0.67255	-0.649698	-2.95977	-2.80856	-2.24913				345
YDR288W	NSE3	-0.13312	-0.340972	-0.950605	-2.42826	-2.0095	-3.81238				346
YEL019C	MMS21	-0.136629	-0.266855	-0.371063	-2.17973	-1.6297	-1.88227				347
YER038C	KRE29	-0.489939	-0.0671065	-0.470827	-2.86812	-1.75465	-2.26546				348
YGR270W	YTA7	0.654841	-0.255816	-0.468682	-1.74948	-2.25553	-3.12718	A		6	349
YKR010C	TOF2	-0.605768	-0.261041	-0.329587	-2.54461	-2.26569	-2.40405				350
YPR104C	FHL1	-0.503322	-0.572053	-0.676568	-2.43822	-3.1465	-3.42533				351
YOL017W	ESC8	-0.457498	-0.543741	-0.784063	-2.58235	-3.03562	-2.69105				352
YDL156W	CMR1	0.324762	-0.0701501	-0.201014	-0.597852	-2.08176	-1.61228				353
YGL029W	CGR1	0.0757975	-0.0997136	-0.4745	-1.83791	-1.946	-2.00109				354
YDL197C	ASF2	-0.543839	-0.203963	-0.592569	-3.00431	-2.33796	-3.88824				355
YPL008W	CHL1	-0.365657	-0.0670807	-0.509869	-2.39199	-1.14721	-3.73831				356
YER147C	SCC4	-0.166707	-0.151448	-0.344877	-2.23512	-1.92702	-2.18588				357
YDR180W	SCC2	-0.156677	-0.299283	-0.555763	-1.87048	-2.19677	-3.08956				358
YDR014W	RAD61	-0.470169	-0.487524	-0.403251	-2.42386	-2.28229	-2.43676				359
YLR272C	YCS4	-0.173855	-0.0603706	-0.40359	-1.62719	-2.44946	-3.19223				360
YDR325W	YCG1	-0.576017	-0.397579	-0.461178	-1.90915	-1.63517	-2.81584				361
YLR086W	SMC4	-0.221498	-0.449075	-0.242843	-2.08076	-1.81612	-1.54752				362
YFR031C	SMC2	-0.412571	-0.662616	-0.222106	-1.88766	-2.13237	-1.90514				363
YBL097W	BRN1	-0.212428	-0.251051	-0.360485	-3.27494	-3.29656	-4.43529				364
YJL074C	SMC3	-0.0420936	-0.12602	-0.412263	-1.71029	-1.03133	-3.29722	A		7	365
YFL008W	SMC1	-0.179502	-0.498535	-0.0290289	-1.89159	-2.23749	-1.68034	A		7	366
YDL003W	MCD1	0.342778	-0.144129	0.0458099	-2.39117	-1.97171	-2.15913	A		7	367
YIL026C	IRR1	-0.1807	-0.316669	0.349614	-1.62047	-1.90989	-0.750776	A		7	368
YPR135W	CTF4	0.0618897	-0.230067	0.155686	-1.6613	-2.68192	-3.45288	A		7	369
YMR076C	PDS5	0.0308249	0.343975	-0.0519969	-1.68025	-0.342067	-3.24661	A		7	370
YPR120C	CLB5	-0.480802	-0.451997	-0.628477	-2.03367	-1.50952	-3.26972				371
YCL016C	DCC1	-0.627351	-0.320385	-0.375664	-2.65842	-2.60726	-2.83876				372
YMR078C	CTF18	-0.0101572	-0.197449	-0.271109	-2.17819	-2.10676	-3.76961				373
YDR052C	DBF4	-0.284728	-0.663563	-0.426827	-2.10928	-2.44655	-2.06425				374
YDL017W	CDC7	-0.480801	-0.473666	-0.721431	-1.92786	-2.44015	-3.8852				375
YGL090W	LIF1	-0.549735	-0.577834	-0.473855	-2.47139	-2.58612	-2.38534				376
YDR419W	RAD30	-0.297524	-0.150182	-0.432728	-2.12884	-2.1685	-1.65954				377
YIR008C	PRI1	-0.0380295	-0.209104	-0.331832	-1.01603	-1.81484	-2.26075				378
YJR043C	POL32	0.0951135	-0.0558676	-0.599452	-1.70278	-1.60147	-2.14105				379
YJR006W	POL31	-0.434206	-0.263792	-0.534556	-2.56826	-1.35077	-2.14046				380
YNL262W	POL2	-0.0260261	-0.518515	-0.188211	-2.67865	-2.02509	-2.12957				381
YBL035C	POL12	0.220935	-0.429767	-0.20807	-1.70177	-3.0844	-3.44857				382
YNL102W	POL1	-0.0417755	-0.462668	-0.629965	-1.52107	-1.58335	-2.61296				383
YKL017C	HCS1	-0.33546	-0.460495	-0.478943	-2.77662	-2.02209	-1.72077				384
YDR121W	DPB4	0.260648	-0.0245343	0.0381608	-3.11119	-1.708	-2.37885				385
YBR278W	DPB3	-0.282826	-0.406541	-0.332973	-2.49926	-1.6319	-3.02283				386
YPR175W	DPB2	0.103995	-0.52659	-0.616157	-2.03599	-1.92198	-3.08184				387
YKL108W	SLD2	-0.695262	-0.742533	-0.515522	-1.97005	-2.13741	-2.82775				388
YJL090C	DPB11	-0.236021	-0.23524	-0.503956	-1.97797	-2.11116	-4.49176				389
YOR144C	ELG1	-0.31754	-0.503208	-0.459512	-2.1475	-2.17359	-2.27129				390
YOL146W	PSF3	-0.110661	-0.427235	-0.24697	-2.09534	-1.72731	-1.61003				391
YDR013W	PSF1	-0.0433531	-0.711817	-0.492932	-1.53985	-2.61331	-2.15467				392
YJL072C	PSF2	0.595007	-0.739244	-0.675015	-0.385745	-1.7272	-2.33935	A		7	393
YLR274W	MCM5	0.177702	-0.389615	-0.390318	-1.50184	-2.29173	-1.37149	AD		7	394
YPR019W	MCM4	-0.196901	-0.313359	-0.216143	-1.91227	-1.66997	-2.31365	AD		7	395
YGL201C	MCM6	0.129386	-0.444879	0.457246	-1.4406	-1.73055	-0.692209	AD		7	396
YBL023C	MCM2	-0.194924	-0.372436	-0.0417246	-1.78455	-2.14541	-1.79806	AD		7	397
YIL150C	MCM10	-0.161171	-0.376271	-0.240262	-2.05834	-1.98226	-2.41402				398
YDR386W	MUS81	-0.607807	-0.194149	-0.576522	-2.94987	-2.01196	-3.16549				399
YML065W	ORC1	-0.308769	0.0219039	-0.038976	-2.02679	-2.51357	-2.12696	AD		7	400
YBR060C	ORC2	-0.347224	-0.0749962	-0.595918	-2.3025	-1.94779	-3.18975	AD		7	401
YNL261W	ORC5	-0.329144	-0.226563	-0.210151	-2.73295	-2.77578	-3.23381	AD		7	402
YHR118C	ORC6	-0.265945	0.21158	0.108325	-2.01551	-1.49698	-2.61207	AD		7	403
YAR007C	RFA1	1.55498	0.669614	0.590843	-1.5733	-1.12154	-2.21307	A		7	404
YNL312W	RFA2	2.23202	-0.219151	0.164411	-0.413676	-1.89124	-2.67791	A		7	405
YJL173C	RFA3	1.57309	0.412633	0.42013	-0.940502	-1.99294	-1.43715	A		7	406
YOL094C	RFC4	-0.373025	0.0528798	-0.40806	-2.29855	-0.777408	-2.50428				407
YER173W	RAD24	-0.47358	-0.236197	-0.503915	-2.56107	-2.25625	-2.27817				408
YBR087W	RFC5	-0.0885858	0.237782	0.248065	-2.29463	-2.23283	-2.50344				409
YNL290W	RFC3	0.0834872	0.953405	0.881285	-1.10147	-0.704429	-1.61169	A		7	410
YJR068W	RFC2	0.281226	1.21405	0.865574	-1.67323	0.291884	-1.38968	A		7	411
YOR217W	RFC1	-0.314624	0.952355	0.64558	-1.88341	-1.03177	-2.2364	A		7	412
YNL273W	TOF1	-0.261435	0.183043	-0.48717	-2.00169	-0.188301	-4.6452				413
YCL061C	MRC1	-0.137042	-0.316764	-0.432603	-1.84087	-2.16873	-2.33978				414
YMR048W	CSM3	-0.156204	-0.472214	-0.213948	-2.28312	-2.14697	-1.3081				415
YJR046W	TAH11	-0.383687	-0.272373	-0.469974	-2.4165	-1.57375	-2.31035				416
YOR060C	SLD7	-0.225352	-0.414215	-0.548474	-2.25749	-2.50639	-3.09447				417
YGL113W	SLD3	-0.739977	-0.203682	-0.448182	-2.11028	-1.83628	-2.97497				418
YOR346W	REV1	NA	NA	NA	NA	NA	NA				419
YKL113C	RAD27	0.0564249	-0.0100004	0.0974072	-2.94686	-2.0119	-2.08301				420
YNL218W	MGS1	-0.386856	-0.503311	-0.426742	-3.00217	-2.77954	-1.84795				421
YHR164C	DNA2	-0.236065	-0.518636	-0.606708	-2.7237	-3.23673	-2.45028				422
YDL164C	CDC9	-0.289979	-0.323159	-0.299824	-2.14038	-2.09406	-2.89049				423
YLR103C	CDC45	0.590919	-0.431213	-0.408355	-0.791927	-3.27982	-2.1104	A		7	424
YOL006C	TOP1	0.780732	0.207369	-0.117748	-1.45971	-1.38496	-2.17276	A		7	425
YLR234W	TOP3	-0.402651	-0.413635	-0.852316	-2.50278	-3.51387	-2.16211				426
YNL088W	TOP2	1.50169	0.942732	0.826842	-1.10461	-1.09119	-2.36508	A		7	427
YJR035W	RAD26	-0.496146	-0.415047	-0.468716	-2.21988	-1.54877	-3.52962				428
YKL054C	DEF1	-0.396814	0.0116985	-0.29375	-1.77103	-2.16678	-2.07817				429
YMR106C	YKU80	-0.285331	-0.55049	-0.422204	-2.55536	-2.24803	-2.79002				430
YMR284W	YKU70	-0.59516	-0.344002	-0.31866	-2.45796	-2.49119	-1.559				431
YNL082W	PMS1	-0.427518	-0.461284	-0.413654	-1.05928	-1.75037	-1.54829				432
YCR092C	MSH3	-0.0623508	0.0441509	-0.21668	-1.20212	-1.13318	-2.69974				433
YLR035C	MLH2	-0.40327	-0.205294	-0.827794	-2.08743	-1.8011	-2.22284				434
YMR167W	MLH1	-0.516519	-0.491211	-0.593482	-1.55914	-2.02591	-3.32712				435
YDR369C	XRS2	-0.339036	-0.0940617	-0.248687	-2.35313	-1.54981	-2.3305				436
YNL250W	RAD50	-0.356379	-0.305962	-0.722211	-1.99383	-2.3508	-2.92855				437
YMR224C	MRE11	-0.245643	-0.114659	-0.499033	-2.2574	-2.06148	-1.99848				438
YOL090W	MSH2	0.725357	0.0745569	-0.187933	-1.63882	-1.3906	-3.93402				439
YDR097C	MSH6	0.339719	0.29497	0.197427	-1.54254	-1.15067	-2.4273				440
YOR368W	RAD17	-0.0701721	-0.6053	-0.357339	-1.93139	-2.24615	-2.40101				441
YLR288C	MEC3	-0.201311	-0.431765	-0.420557	-1.71918	-2.63948	-2.50933				442
YPL194W	DDC1	-0.271423	0.0259376	-0.218255	-1.93192	-1.66836	-1.73889				443
YCR066W	RAD18	-0.298509	-0.482282	-0.358243	-2.42978	-2.07936	-2.5651				444
YLR376C	PSY3	-0.566528	-0.385609	-0.504997	-2.25524	-3.15311	-3.09276				445
YPL024W	RMI1	-0.281655	-0.477633	-0.602732	-2.41229	-2.46609	-2.35642				446
YER041W	YEN1	-1.2674	-0.609457	-0.194653	-2.84335	NA	-2.72804				447
YML021C	UNG1	-0.0583969	0.0234861	-0.100557	-1.81436	-2.7728	-2.59208				448
YOR191W	ULS1	-0.14202	-0.344108	-0.659214	-1.99836	-1.7198	-2.07211				449
YDR092W	UBC13	-0.111106	-0.254973	-0.391949	-1.45622	-1.81507	-3.0175				450
YBR223C	TDP1	-0.224277	-0.406189	-0.468467	-2.11866	-2.10474	-2.14671				451
YNL309W	STB1	-0.32204	-0.0674979	-0.182942	-1.96168	-1.99884	-2.24267				452
YJL092W	SRS2	-0.148441	-0.290207	-0.349078	-1.67151	-2.41559	-2.00645				453
YER116C	SLX8	-0.268103	-0.390244	-0.304198	-1.52582	-1.7704	-2.2079				454
YLR135W	SLX4	-0.774747	-0.491628	-0.293926	-2.27092	-2.43677	-3.7436				455
YAL027W	SAW1	NA	NA	NA	NA	NA	NA				456
YGL175C	SAE2	-0.205736	-0.553258	-0.479025	-1.92351	-4.10134	-2.19891				457
YHR154W	RTT107	NA	NA	NA	NA	NA	NA				458
YHR031C	RRM3	-0.370357	-0.220073	-0.165839	-1.46872	-2.36093	-3.52223				459
YER070W	RNR1	NA	-0.53788	0.245412	NA	-4.39326	-1.55995				460
YBR073W	RDH54	-0.539066	-0.332878	-0.38358	-2.04582	-1.55185	-1.97615				461
YJR052W	RAD7	-0.311701	0.0104205	-0.378639	-1.74943	-2.32024	-2.6824				462
YDL059C	RAD59	0.0302198	-0.295453	-0.610464	-1.64665	-2.31663	-2.85001				463
YDR004W	RAD57	-0.578349	-0.330481	-0.626559	-2.76796	-1.72548	-2.469				464
YDR076W	RAD55	-0.542888	-0.36795	-0.745488	-2.31974	-1.93081	-2.02016				465
YGL163C	RAD54	-0.176328	-0.446068	-0.197459	-2.68866	-2.06542	-2.34233				466
YML032C	RAD52	-0.0882389	-0.146726	-0.24518	-1.28716	-1.37592	-2.14726				467
YLR032W	RAD5	-0.394545	-0.302668	-0.399375	-2.28531	-2.38516	-2.66681				468
YER162C	RAD4	-0.028923	0.0589135	-0.212138	-1.67133	-1.90874	-1.5283				469
YDR314C	RAD34	-0.17611	-0.23049	-0.423803	-1.94165	-1.4738	-2.55415				470
YGR258C	RAD2	-0.591393	-0.110849	-0.385421	-1.9651	-1.44548	-3.21463				471
YBR114W	RAD16	-0.187263	0.00277757	-0.245488	-1.76	-2.43053	-2.63006				472
YMR201C	RAD14	-0.608671	-0.365347	-0.629547	-2.45472	-3.20819	-2.17548				473
YMR137C	PSO2	-0.822426	-0.751734	-0.900222	-1.9275	-3.12565	-3.27025				474
YML061C	PIF1	-0.341846	-0.462101	-0.44241	-2.03157	-2.31312	-2.93557				475
YOR386W	PHR1	-0.529391	0.375054	0.479135	-2.47545	-1.14609	-0.919694				476
YOL043C	NTG2	-0.325608	-0.0655156	-0.118324	-2.20116	-2.05802	-1.2856				477
YAL015C	NTG1	-0.369954	-0.187786	-0.52998	-2.82762	-1.75819	-2.79179				478
YLR265C	NEJ1	-0.605021	-0.277056	-0.152992	-3.24435	-3.19012	-2.81848				479
YGL087C	MMS2	-0.095487	-0.277396	-0.128365	-1.9868	-2.28814	-1.46063				480
YER142C	MAG1	-0.491731	0.0628629	-0.184945	-2.32721	-2.06805	-3.07245				481
YDR499W	LCD1	-0.172053	-0.360792	-0.76417	-1.85308	-1.9461	-1.76551				482
YML058W-A	HUG1	-0.580554	-0.0184728	-0.337279	-2.15264	-1.51704	-3.08823				483
YOR258W	HNT3	-0.222921	-0.538664	-0.354949	-2.17036	-1.99596	-2.78904				484
YOR033C	EXO1	-0.411652	-0.515355	-0.40763	-2.03385	-2.47174	-3.08852				485
YMR173W	DDR48	-0.390211	-0.345176	-0.330557	-2.51879	-2.28491	-1.87001				486
YDL220C	CDC13	-0.165618	-0.36304	0.0449048	-2.09878	-2.47412	-1.55852				487
YBL019W	APN2	-0.442646	-0.709034	-0.493414	-1.67485	-2.30596	-2.4073				488
YKL114C	APN1	-0.202607	0.807374	0.403869	-2.47834	-1.44123	-2.52058				489
YER095W	RAD51	0.0712102	-0.393063	-0.193795	-1.51371	-3.01784	-2.02978				490
YEL037C	RAD23	1.02671	0.0463128	0.137488	0.225595	-2.89392	-3.24334				491
YER089C	PTC2	0.164532	-0.0754703	-0.178784	-3.55309	-2.10214	-3.67977				492
YML011C	RAD33	-0.438857	-0.320587	-0.375467	-1.95557	-2.22467	-1.88086				493
YPL022W	RAD1	-0.445091	-0.217219	-0.238412	-2.96395	-2.12193	-2.42156				494
YDR291W	HRQ1	0.233985	-0.141693	-0.268325	-0.790233	-2.09279	-2.10166				495
YDL126C	CDC48	-0.00136443	0.717118	1.91341	-2.19332	-0.929943	0.552433	AE		8	496
YHR064C	SSZ1	-0.0513901	-0.303236	-0.0353541	-1.8057	-1.38095	-1.63527				497
YAL005C	SSA1	2.6949	3.01973	3.6	-0.168011	1.31565	0.926516	AE		8	498
YLL024C	SSA2	2.38501	0.999165	2.54243	-0.461335	-1.04517	0.455826	AE		8	499
YMR186W	HSC82	1.32332	2.58828	3.08205	-1.89435	1.00878	0.719347	AE		8	500
YPL240C	HSP82	0.72213	2.34382	2.80157	-2.18261	0.374386	0.463814	AE		8	501
YNL007C	SIS1	1.19938	2.02603	1.57351	-1.08177	0.0394138	-0.550983	AE		8	502
YLL026W	HSP104	1.35416	2.37834	1.88334	-1.98045	1.17164	0.303021	AE		8	503
YFL014W	HSP12	0.599748	2.33355	1.89447	-1.61094	0.518254	-0.519577	AE		8	504
YIL153W	RRD1	-0.152369	-0.139118	-0.095965	-1.69576	-2.76009	-2.17455				505
YDR155C	CPR1	0.641283	1.70667	1.35426	-1.72445	-0.596172	-1.48417	AE		8	506
YNL123W	NMA111	0.383065	-0.170002	0.0379089	-1.36895	-1.98449	-2.56496	A		8	507
YJR017C	ESS1	0.0945798	-0.397216	-0.405167	-2.29666	-3.50699	-3.60884	A		8	508
YJR032W	CPR7	-0.147892	-0.351939	-0.292721	-2.08279	-2.91428	-2.67066	A		8	509
YNL135C	FPR1	0.482983	1.55917	0.783946	-1.46738	0.120302	-0.776127	A		8	510
YLR216C	CPR6	0.428862	1.36557	1.31216	-1.76602	-0.449267	0.123127	AE		8	511
YML074C	FPR3	0.123257	0.441325	0.207115	-2.08776	-0.872921	-2.45757	A		8	512
YLR449W	FPR4	0.224458	0.485297	0.390083	-1.25504	-0.907535	-1.08384	A		8	513
YLR153C	ACS2	0.988861	-0.263364	1.24809	-1.35589	-2.05211	0.142238	A	G	9	514
YAL054C	ACS1	0.359364	1.79473	1.64027	-0.678954	-0.0310657	0.0221888	A	G	9	515
YJR109C	CPA2	0.30882	-0.254256	-0.017143	-1.4452	-2.03234	-2.3465	A		9	516
YOR303W	CPA1	0.754149	-0.464635	-0.629259	0.195339	-1.85852	-2.51735	A		9	517
YGR192C	TDH3	3.53943	3.33898	2.94559	1.17358	0.303935	1.01062	A	G	9	518
YJR009C	TDH2	2.50852	0.824624	1.31466	1.02073	-1.31483	0.111299	A	G	9	519
YJL052W	TDH1	0.471122	1.55607	1.4527	-1.71325	0.0818969	0.0185043	A	G	9	520
YMR205C	PFK2	1.11446	-0.0467545	1.12891	0.19822	-1.12154	-0.490419				521
YNR012W	URK1	-0.640562	-0.129006	-0.564312	-2.54873	-0.850105	-1.55543				522
YDR071C	PAA1	-0.195563	-0.105563	-0.0876594	-1.7787	-1.67196	-2.49613				523
YML060W	OGG1	-0.087573	-0.306575	-0.168872	-1.84432	-2.43111	-2.30575				524
YLR285W	NNT1	-0.371129	-0.209147	-0.438574	-3.71623	-3.05426	-1.73514				525
YDR296W	MHR1	-0.573692	-0.391447	-0.691798	-2.55304	-2.01289	-2.78789				526
YIL128W	MET18	-0.37988	-0.625785	-0.618795	-2.05861	-2.15816	-2.64248				527
YDR034C	LYS14	-0.406794	NA	-0.661964	-4.91824	NA	-2.23357				528
YDR098C	GRX3	-0.0221051	0.106431	0.0750624	-1.72191	-1.84375	-3.19027				529
YML080W	DUS1	0.0386042	-0.272755	-0.227401	-1.85739	-2.15854	-2.58366				530
YLR134W	PDC5	5.2176	4.22725	4.92286	#NAME?	1.95836	2.41303	A	G	9	531
YKL060C	FBA1	4.47504	4.24112	4.47433	1.60796	2.19688	2.97407	A	G	9	532
YPL061W	ALD6	4.41434	3.56017	4.02144	2.18751	1.02088	1.31211	A	G	9	533
YAL038W	CDC19	3.49115	3.8079	3.79213	1.08228	1.70176	2.61787	A	G	9	534
YHR183W	GND1	2.96237	1.84225	3.28427	-0.124217	-0.230568	1.90433	A	G	9	535
YDL055C	PSA1	3.21023	1.47678	1.26281	0.654219	0.641398	-1.19993	A	G	9	536
YLR109W	AHP1	1.65284	1.06097	1.97179	-1.06987	-1.08944	0.396584	A	G	9	537
YCR012W	PGK1	2.55973	3.26989	2.95773	-0.9817	0.957935	0.45243	A	G	9	538
YEL046C	GLY1	2.28382	-0.138765	0.0799281	-0.255905	-2.09203	-2.14766	A	G	9	539
YML028W	TSA1	2.27273	2.27756	2.80348	-0.281307	-0.498802	0.426482	A	G	9	540
YPR074C	TKL1	2.7303	1.39178	2.05599	-0.359544	-0.131586	-0.113162	A	G	9	541
YDL182W	LYS20	2.18025	0.945724	1.72626	0.448122	-0.589209	0.652738	A	G	9	542
YGL253W	HXK2	1.35289	0.771754	0.95774	-1.51391	-0.683635	-2.153	A	G	9	543
YDR353W	TRR1	1.404	0.277299	0.504663	-1.44193	-1.55328	-0.827782	A	G	9	544
YNR050C	LYS9	2.21545	0.440353	1.64283	-1.54853	-0.909521	-0.0666638	A	G	9	545
YNL063W	MTQ1	1.55642	0.0668017	0.811905	0.42206	-0.95374	-0.74549	A	G	9	546
YOR375C	GDH1	1.23595	0.0988494	0.514125	-1.50479	-1.39593	-2.26966	A	G	9	547
YIL053W	RHR2	1.21555	0.990789	0.486906	-1.04615	-0.628557	-1.88851	A	G	9	548
YKL216W	URA1	1.75472	2.37132	1.58737	-1.30678	1.74995	-1.42217	A	G	9	549
YPL028W	ERG10	1.29846	1.43414	1.9301	-1.87814	-0.634365	-0.379716	A	G	9	550
YIR034C	LYS1	1.91722	0.615013	1.09339	-0.235449	-1.35699	-0.223827	A	G	9	551
YER091C	MET6	1.68792	0.985366	0.911492	-0.962206	-1.40642	-1.93807	A	G	9	552
YLR180W	SAM1	1.33801	-0.399614	-0.265991	-1.4213	-2.42019	-1.85096	A	G	9	553
YBR011C	IPP1	0.969815	0.258564	0.865591	-1.17273	-1.39281	-0.813888	A	G	9	554
YLR354C	TAL1	1.46351	2.51124	2.32705	-1.78567	-0.0963012	0.303238	A		9	555
YML126C	ERG13	1.40081	0.0471738	1.14129	-0.820927	-1.94547	-0.557837	A		9	556
YJR104C	SOD1	1.01475	1.3395	0.990781	-1.9992	0.035683	-0.417929	A		9	557
YGR254W	ENO1	1.14486	2.65968	2.15873	-1.30273	0.230586	-0.584227	A		9	558
YBL024W	NCL1	1.37272	0.213733	1.17653	-1.80797	-1.81034	-0.343707	A		9	559
YLR058C	SHM2	1.85708	2.8826	3.30459	-1.39899	0.546026	0.966467	A	G	9	560
YDR399W	HPT1	0.618274	0.350401	0.0264424	-1.45051	-1.99898	-2.53071	A		9	561
YGL009C	LEU1	1.31702	0.131756	-0.179605	-0.777634	-1.54702	-2.05422	A		9	562
YDR158W	HOM2	0.864412	-0.16315	0.0163487	0.419753	-1.73272	-2.61564	A		9	563
YAL012W	CYS3	0.610993	0.00460796	0.310753	-1.83897	-2.32808	-1.70616	A		9	564
YGR061C	ADE6	0.75879	0.257713	0.0927231	-1.93184	-2.01828	-3.09228	A		9	565
YGR204W	ADE3	0.716682	0.448014	0.715543	-2.29395	-0.245696	-1.37895	A		9	566
YDL131W	LYS21	1.41542	0.848398	1.64779	-1.76475	-1.17525	0.0626349	A		9	567
YGR124W	ASN2	0.459074	-0.0768218	-0.210667	-1.45828	-1.30216	-1.62242	A		9	568
YDR502C	SAM2	0.31378	-0.51933	-0.289759	-1.44444	-2.56155	-1.57834	A		9	569
YKL035W	UGP1	0.914868	1.54754	2.06051	-1.67845	-1.5849	-0.0964261	A		9	570
YOL058W	ARG1	0.254966	2.42332	2.16708	-1.87121	1.45404	0.505301	A	G	9	571
YJL130C	URA2	0.760397	1.04038	1.05468	-1.05989	-1.06715	-1.38557	A		9	572
YMR120C	ADE17	1.23109	0.526681	0.689854	-1.6068	-1.90887	-1.78225	A		9	573
YMR318C	ADH6	0.511912	-0.47845	-0.286401	-1.09035	-3.102	-2.10959	A		9	574
YMR228W	MTF1	2.13297	0.10065	0.236653	-0.216056	-1.41834	-1.46106	A		9	575
YDR226W	ADK1	1.35696	0.6064	0.676022	0.465804	-2.10212	-1.78386	A		9	576
YLR027C	AAT2	0.326941	0.61454	0.784569	-1.80146	-1.77388	-2.03693	A		9	577
YBR115C	LYS2	-0.0417123	0.869189	0.30788	-1.5419	-0.0637531	-2.01919	A		9	578
YHR216W	IMD2	0.181012	-0.335164	-0.338388	-1.28488	-2.2554	-2.40805	A		9	579
YGR234W	YHB1	0.545564	-0.306458	-0.0739193	-1.8922	-2.99944	-1.76412	A		9	580
YNL220W	ADE12	-0.282328	-0.377197	-0.00666824	-2.08094	-2.46805	-1.16485	A		9	581
YOR209C	NPT1	0.210372	-0.215615	0.0572103	-1.92184	-1.63173	-1.71834	A		9	582
YGR209C	TRX2	0.05239	0.783294	0.576848	-1.97853	0.0226094	-1.50563	A		9	583
YEL071W	DLD3	-0.22566	-0.0441629	-1.20328	-1.83244	-2.023	-2.84938	A		9	584
YKL067W	YNK1	0.158842	0.875311	0.880999	-2.26561	-0.956857	-1.86451	A		9	585
YCL040W	GLK1	-0.31158	0.809196	0.984796	-2.37565	-1.35927	-1.62165	A		9	586
YGL037C	PNC1	-0.451121	0.412146	0.340412	-2.11478	-2.06315	-2.43727	A		9	587
YHR167W	THP2	-0.492316	-0.242454	-0.250038	-2.83964	-2.67656	-2.45132				588
YML062C	MFT1	0.0528543	-0.312858	-0.387047	-2.07339	-1.63847	-2.59636				589
YNL139C	THO2	-0.132495	-0.527891	-0.584777	-2.20804	-1.90911	-2.58511				590
YDR138W	HPR1	-0.142453	-0.448592	-0.182102	-1.42713	-2.43149	-2.34954				591
YGL173C	XRN1	-0.605455	-0.22942	-0.246828	-2.38839	-3.08234	-2.72479				592
YGL130W	CEG1	NA	NA	NA	NA	NA	NA				593
YPL228W	CET1	1.52492	-0.208217	-0.213497	-1.5143	-1.93939	-1.80595				594
YER029C	SMB1	0.0321214	0.269285	0.110592	-1.82101	-0.954171	-1.49016				595
YIL061C	SNP1	-0.0439865	-0.210382	-0.466679	-2.04583	-2.65911	-3.13217				596
YLR116W	MSL5	0.133462	-0.192232	-0.435902	-1.70562	-2.69123	-2.71774				597
YGR013W	SNU71	-0.0414438	-0.36849	-0.717414	-0.679802	-1.77629	-2.87015				598
YPR182W	SMX3	0.0597766	0.1318	0.0524837	-1.67087	-1.82967	-0.972017				599
YLR275W	SMD2	-0.0552795	0.127385	0.00310334	-0.819251	-1.81523	-1.51682				600
YDR240C	SNU56	-0.0114956	-0.185395	-0.378301	-1.21051	-1.38042	-1.61438				601
YBR119W	MUD1	-0.0146346	-0.247009	-0.501777	-1.8151	-1.99631	-2.26032				602
YFL017W-A	SMX2	-0.256067	0.0257132	0.253051	-1.73159	-1.64841	-2.0496				603
YGR074W	SMD1	0.290282	0.355709	0.655462	-1.69951	-2.07096	-0.648984				604
YKL074C	MUD2	-0.233388	-0.486601	-0.400441	-2.28016	-2.09796	-2.13806				605
YDR432W	NPL3	2.15923	0.878586	0.927096	0.160883	-0.681527	-1.72055				606
YMR125W	STO1	2.04721	0.497326	0.371892	-1.06605	-1.44537	-2.32472				607
YPL178W	CBC2	1.57802	0.630228	0.495082	0.198563	-1.13052	-1.72784				608
YDL160C	DHH1	-0.544674	0.156389	0.024091	-1.88473	-2.07301	-1.83369				609
YER035W	EDC2	-0.214848	0.667119	0.186726	-1.96241	-1.74174	-1.25249				610
YNL118C	DCP2	-0.380481	-0.472285	-0.434903	-2.27808	-1.95248	-2.51338				611
YOL149W	DCP1	-0.466104	-0.224905	-0.222829	-2.37187	-2.35629	-1.72371				612
YOR001W	RRP6	-0.323017	-0.332277	0.158155	-1.56836	-1.43679	-1.09646				613
YOL021C	DIS3	0.297999	-0.0310785	0.101	-2.55945	-1.59914	-2.24432				614
YDL111C	RRP42	-0.0877138	-0.311302	-0.160631	-1.24533	-2.02316	-2.02531				615
YHR077C	NMD2	-0.357744	-0.336863	-0.243941	-2.26295	-3.05376	-2.10661				616
YMR080C	NAM7	-0.305849	-0.350739	-0.362299	-1.98437	-1.99795	-3.08998				617
YKL025C	PAN3	-0.288997	-0.374921	-0.281276	-2.30448	-2.39886	-1.86817				618
YGL094C	PAN2	-0.556102	-0.537538	-0.53437	-3.10533	-2.64059	-2.90405				619
YBL054W	TOD6	-0.459256	-0.393113	-0.452171	-2.60645	-1.69192	-1.71737				620
YHR085W	IPI1	-0.39297	-0.352247	-0.294955	-2.37671	-3.14415	-2.89916				621
YHR197W	RIX1	0.111398	-0.300326	-0.422822	-1.87268	-2.83678	-2.51288				622
YGL213C	SKI8	-0.25631	-0.165405	-0.449329	-2.60176	-1.90196	-2.25306				623
YJL050W	MTR4	0.191623	0.208591	0.315051	-1.93755	-1.52687	-2.66555				624
YDL084W	SUB2	-0.565334	-0.377227	-0.271254	-2.68145	-2.61793	-2.34938				625
YPL029W	SUV3	-0.220889	-0.541711	-0.207727	-1.89368	-2.67039	-1.78602				626
YNL138W	SRV2	-0.459096	-0.324474	-0.587403	-2.52293	-2.08283	-3.98204				627
YCR073W-A	SOL2	-0.0533624	-0.00367775	-0.379972	-2.00226	-1.98282	-5.14815				628
YJL080C	SCP160	-0.479052	-0.180622	-0.00935874	-1.95909	-1.74884	-1.94533				629
YMR239C	RNT1	-0.423611	-0.537883	-0.781898	-2.38185	-1.91254	-3.32714				630
YLR154C	RNH203	-0.149958	-0.259933	-0.638991	-1.67777	-2.20047	-4.11047				631
YDR279W	RNH202	-0.224308	-0.13469	-0.267036	-1.75087	-1.46999	-1.5273				632
YNL072W	RNH201	-0.319951	-0.447921	-0.170661	-1.36535	-2.92727	-1.898				633
YGL014W	PUF4	-0.667357	-0.574393	-0.567773	-2.16504	-2.00302	-3.99222				634
YLL036C	PRP19	-0.232514	-0.313082	-0.100223	-1.82836	-2.20091	-1.77797				635
YCR077C	PAT1	-0.566834	-0.543366	-0.629956	-2.72625	-2.79095	-1.77376				636
YPL126W	NAN1	-0.211461	-0.28774	0.0412389	-1.4829	-2.09294	-1.51396				637
YNL124W	NAF1	-0.25321	-0.352815	-0.631302	-2.43901	-3.14252	-2.40799				638
YPL184C	MRN1	-0.439966	-0.175427	-0.396086	-2.12373	-1.71828	-2.23355				639
YJL124C	LSM1	-0.330759	0.132152	-0.188268	-2.29783	-0.92725	-2.66251				640
YHR156C	LIN1	-0.258961	-0.0744722	-0.192486	-1.34458	-1.99613	-2.39282				641
YBL032W	HEK2	0.131893	-0.220451	-0.113104	-1.32442	-2.08682	-2.88677				642
YHR087W	RTC3	-0.0419351	0.760912	0.421677	-1.96667	0.0882509	-2.34523				643
YKL214C	YRA2	-0.0231255	-0.0307178	-0.131032	-1.80254	-2.18865	-2.49407				644
YMR229C	RRP5	0.410324	0.169486	0.27554	-2.25544	-2.24529	-2.05031				645
YOR243C	PUS7	0.312074	-0.104002	0.173557	-1.256	-1.95305	-2.00385				646
YHR089C	GAR1	0.655827	1.14318	1.4163	-1.47253	-1.29694	-0.925225				647
YLR175W	CBF5	0.107857	0.940414	1.16448	-1.8345	-1.18097	-0.49969				648
YOR051C	ETT1	0.992228	0.407544	-0.0806775	-1.56708	-1.37633	-2.14695				649
YGR159C	NSR1	1.04777	1.55962	0.616212	-1.65162	-0.0494252	-1.24091				650
YGR218W	CRM1	0.251999	-0.111921	0.146934	-1.62301	-1.16961	-2.52731				651
YNL178W	RPS3	0.00342606	-0.0623296	-0.449977	-1.02416	-1.07195	-2.39462				652
YPR132W	RPS23B	0.249178	-0.0877883	-0.426207	-1.68048	-1.21495	-2.10135				653
YML073C	RPL6A	1.36738	-0.00162935	0.847312	-1.27349	-1.45366	-2.59425				654
YGL135W	RPL1B	0.177154	2.42385	1.6723	-1.3739	0.170301	0.543031				655
YMR121C	RPL15B	0.0200844	-0.214396	-0.492324	-2.81408	-2.39346	-2.21477				656
YGL048C	RPT6	-0.493174	-0.3968	-0.608535	-1.86789	-3.22127	-2.37358				657
YDR427W	RPN9	-0.276595	-0.413593	-0.226446	-1.71678	-2.66943	-1.80874				658
YBR272C	HSM3	-0.39009	-0.859165	-0.601902	-1.33201	-2.58768	-2.47059				659
YFL007W	BLM10	-0.303856	-0.497511	-0.356679	-2.19007	-1.79541	-1.91895				660
YDR363W-A	SEM1	0.0488503	-0.378731	0.0936156	-1.271	-2.02871	-1.16242				661
YDL097C	RPN6	0.0404148	-0.265624	-0.193444	-1.77785	-1.49354	-2.81043				662
YFR050C	PRE4	-0.187284	-0.313581	-0.341116	-1.28324	-2.88944	-1.6917				663
YIL033C	BCY1	-0.560762	-0.375812	-0.668934	-2.31136	-2.42239	-1.37558				664
YJL164C	TPK1	0.0170515	-0.119575	-0.433083	-1.92221	-1.66179	-2.06061				665
YBR160W	CDC28	-0.090887	-0.235438	-0.519374	-1.35706	-1.90407	-1.57397				666
YKR038C	KAE1	-0.0334212	-0.315134	-0.279925	-1.91362	-2.55429	-2.54895				667
YJL184W	GON7	-0.0801802	-0.223671	-0.490768	-1.84755	-2.29057	-2.88337				668
YML121W	GTR1	-0.369438	-0.4365	-0.443921	-2.13817	-2.3889	-2.79995				669
YOR341W	RPA190	0.119374	0.891785	1.56968	-1.01752	0.193515	0.76109				670
YDR156W	RPA14	-0.41244	0.296507	0.421761	-2.00778	-0.867377	-0.951162				671
YJL011C	RPC17	0.202644	-0.573593	0.285022	-1.4985	-2.05789	-0.965184				672
YDR361C	BCP1	0.27925	0.215713	-0.116376	-1.25449	-1.57195	-1.82541				673
YNL140C	YNL140C	-0.343037	-0.0835566	-0.283198	-1.70217	-2.28911	-4.05535				674
YJR084W	YJR084W	-0.268915	-0.0157178	-0.318726	-2.27927	-1.51603	-2.92911				675
YGR016W	YGR016W	-0.283252	-0.410391	-0.109079	-1.63356	-2.0463	-2.52966				676
YHR182W	YHR182W	-0.373072	-0.647244	-0.562827	-2.09424	-2.06531	-2.95124				677
YGR042W	MTE1	-0.648459	-0.45535	-0.551353	-2.56371	-2.27617	-2.22908				678
YML109W	ZDS2	-0.325703	-0.507335	-0.473264	-2.72855	-3.08342	-4.16386				679
YMR273C	ZDS1	-0.469487	-0.478737	-0.617182	-3.14393	-2.22995	-2.2562				680
YIL063C	YRB2	0.042549	-0.117256	0.197011	-0.974651	-2.01146	-1.8296				681
YDR520C	URC2	-0.506089	-0.574026	-0.593472	-2.14885	-2.28263	-2.66698				682
YDL091C	UBX3	-0.39663	-0.453105	-0.5009	-2.2064	-1.93015	-2.74165				683
YDL064W	UBC9	0.363165	-0.107576	-0.256207	-1.23402	-2.20014	-3.73083				684
YMR022W	UBC7	-0.363935	-0.464133	-0.88801	-1.97522	-2.22173	-4.22178				685
YOL093W	TRM10	0.0851685	-0.613959	-0.380765	-1.80355	-2.75116	-3.5142				686
YJR066W	TOR1	-0.547056	-0.20103	-0.286312	-2.29359	-1.84979	-1.52137				687
YDR172W	SUP35	-0.261415	-0.236715	-0.236868	-2.59261	-2.49443	-2.89262				688
YML034W	SRC1	-0.295199	-0.546342	-0.511423	-1.43982	-2.71467	-2.6926				689
YKL020C	SPT23	-0.448548	-0.571665	-0.586827	-1.86366	-2.70084	-2.60457				690
YDR510W	SMT3	-0.245051	-0.125827	-0.484904	-2.39632	-1.982	-2.24145				691
YDL047W	SIT4	-0.660764	-0.496865	-0.445657	-1.99095	-1.25411	-1.93256				692
YER120W	SCS2	-0.390047	-0.341864	-0.465377	-2.09217	-2.05403	-2.24217				693
YHR205W	SCH9	-0.412884	-0.0458576	-0.785659	-1.38707	-0.86633	-3.28417				694
YER129W	SAK1	-0.643381	-0.79556	-0.529569	-1.23397	-2.13379	-2.07403				695
YJL047C	RTT101	-0.339978	-0.34901	-0.53897	-1.78905	-1.89859	-1.68607				696
YOR014W	RTS1	-0.35461	-0.311393	-0.565783	-2.86143	-2.10531	-1.96026				697
YGL252C	RTG2	-0.438533	-0.520526	-0.126691	-2.42585	-2.8014	-1.82849				698
YMR235C	RNA1	-0.423716	-0.171788	-0.452201	-2.79673	-1.58674	-1.13968				699
YMR247C	RKR1	-0.372942	-0.60154	-0.398432	-2.00237	-2.3179	-2.31914				700
YDR028C	REG1	-0.493935	-0.605158	-0.782865	-2.18472	-2.19765	-2.65995				701
YOL054W	PSH1	-0.309957	-0.27109	-0.486008	-1.62149	-2.89891	-2.24884				702
YDL188C	PPH22	-0.46766	-0.485	-0.466772	-2.34647	-1.61929	-1.76465				703
YKL128C	PMU1	-0.0669353	-0.441277	-0.58255	-1.99555	-2.40032	-2.24198				704
YPL268W	PLC1	-0.144215	-0.353818	-0.398923	-2.07967	-1.59645	-2.82069				705
YLR151C	PCD1	-0.482316	-0.425597	-0.650958	-1.66214	-2.51971	-1.911				706
YLR335W	NUP2	-0.653119	-0.308749	-0.175795	-2.39159	-1.97994	-2.46594				707
YOR156C	NFI1	-0.505645	-0.343864	-0.584553	-2.36132	-2.33583	-2.78336				708
YMR023C	MSS1	0.0430463	0.115761	-0.0975066	-1.76201	-1.8398	-1.91645				709
YHR120W	MSH1	-0.594647	-0.267781	-0.565515	-2.11211	-2.11343	-2.63409				710
YOR274W	MOD5	-0.177919	-0.263941	-0.50487	-2.60257	-1.74825	-2.08318				711
YKR095W	MLP1	-0.543989	-0.408744	-0.565831	-2.68348	-2.39462	-2.06613				712
YNL085W	MKT1	-0.25345	-0.627989	-0.417877	-2.69234	-3.13637	-2.61071				713
YOR330C	MIP1	0.0432918	-0.221565	-0.54343	-1.32488	-2.63228	-3.61092				714
YIR033W	MGA2	-0.52015	-0.416896	-0.465208	-2.32794	-2.13936	-2.29378				715
YIL046W	MET30	-0.624936	-0.258787	-0.62599	-2.1754	-1.19902	-3.20205				716
YJR024C	MDE1	-0.0675264	-0.323053	-0.282718	-2.12274	-2.56238	-1.43091				717
YKL110C	KTI12	-0.556324	-0.0012723	-0.406455	-2.8579	-1.9967	-2.8383				718
YDL181W	INH1	-0.416407	-0.376766	-0.219527	-2.03086	-2.2652	-2.73527				719
YLR113W	HOG1	-0.239989	0.0949335	0.239888	-2.53299	-1.519	-1.71257				720
YGR163W	GTR2	-0.690617	-0.71432	-0.575506	-2.48875	-4.05398	-2.75169				721
YHR061C	GIC1	-0.492895	-0.224163	-0.349617	-2.00621	-2.1239	-2.68189				722
YMR307W	GAS1	-0.012958	0.056565	-0.268542	-1.84056	-0.913446	-1.90864				723
YOR271C	FSF1	-0.620821	-0.46273	-0.288879	-1.70891	-1.96436	-1.61938				724
YDR363W	ESC2	-0.273257	-0.65668	-0.57863	-1.76725	-3.17384	-2.34714				725
YMR299C	DYN3	-0.484253	0.066142	-0.404987	-2.73	-0.371908	-2.46924				726
YDL101C	DUN1	0.138713	-0.395662	-0.645353	-0.750244	-2.74852	-3.34913				727
YNL258C	DSL1	-0.246783	-0.405401	-0.619417	-2.24045	-2.18803	-2.90932				728
YDR069C	DOA4	-0.525131	-0.595008	-0.622402	-2.35802	-1.70233	-3.3197				729
YGL238W	CSE1	0.183587	-0.0992376	0.278551	-1.23824	-1.60566	-1.62024				730
YLR395C	COX8	0.0953675	0.119591	0.262073	-2.05703	-2.01846	-1.92747				731
YLR117C	CLF1	-0.731585	-0.522466	-0.406741	-3.14121	-3.21804	-5.20368				732
YBR135W	CKS1	-0.473804	-0.390389	-0.0553266	-2.87242	-2.1291	-2.10089				733
YEL061C	CIN8	-0.419673	-0.275203	-0.407251	-2.35731	-1.87915	-2.63277				734
YBR274W	CHK1	-0.429623	-0.658626	-0.480337	-1.83769	-2.13364	-2.14796				735
YDL132W	CDC53	0.324075	-0.399328	-0.620133	-0.551992	-1.80512	-2.78232				736
YDR182W	CDC1	-0.768568	-0.424302	-0.558627	-2.48578	-2.1991	-1.70835				737
YFL029C	CAK1	-0.35034	-0.328002	-0.211701	-1.95523	-1.47229	-1.73861				738
YMR275C	BUL1	-0.211504	-0.56223	-0.655338	-2.1551	-2.44657	-2.97217				739
YLR319C	BUD6	-0.440489	-0.432382	-0.403366	-2.36348	-2.33879	-2.36944				740
YGL202W	ARO8	-0.0792322	-0.67926	-0.313819	-1.91357	-2.4687	-1.9095				741
YMR072W	ABF2	-0.384892	-0.57488	-0.545249	-2.09805	-1.99565	-2.64826				742
YAL061W	BDH2	0.384794	2.96217	2.33949	-1.74121	-0.0965062	1.06176				743
YDR409W	SIZ1	-0.353881	0.663898	0.274102	-2.3264	-0.729123	-2.16972				744
YKL210W	UBA1	1.52078	0.156681	0.996318	-2.35256	-1.4705	-0.992791				745
YPL260W	YPL260W	0.0432357	-0.103263	0.0948	-2.13457	-1.76031	-3.29435				746
YLR358C	YLR358C	-0.349162	-0.286337	-0.00629495	-2.09713	-2.33005	-2.57196				747
YBL028C	YBL028C	1.00331	-0.558807	-0.286552	-1.92643	-2.14481	-3.02977				748
YDL201W	TRM8	0.225613	-0.162246	-0.290574	-2.68499	-2.69019	-2.44759				749
YLR262C-A	TMA7	0.534144	-0.209517	-0.217737	-2.50462	-2.21326	-3.11716				750
YBL058W	SHP1	-0.129004	0.187984	0.430602	-2.13098	-1.292	-1.44848				751
YDR257C	RKM4	0.127984	-0.307733	-0.448795	-1.57045	-2.01554	-2.32754				752
YMR311C	GLC8	-0.354311	-0.0209187	-0.0235258	-1.95968	-2.00378	-2.39165				753
YLR436C	ECM30	0.0477333	0.0770396	-0.0648266	-1.86777	-1.69537	-2.30349				754
YAL059W	ECM1	0.223141	0.0057788	0.00161855	-1.20646	-1.73759	-2.37701				755

## Sheet: BC_DN
ORF	Name	mean_log	mean_Q	mean_NQ	sd_log	sd_Q	sd_NQ	fig5	figS5	group fig 5A	nr
YOR151C	RPB2	5.30652	3.45852	3.03995	3.22196	3.1781	2.46307	AB		1	1
YDL140C	RPO21	4.3032	1.90599	1.79425	3.37737	1.33125	-0.592542	AB		1	2
YOL005C	RPB11	3.33961	1.06125	1.10116	1.60075	-0.220315	-0.10464	AB		1	3
YIL021W	RPB3	4.32087	2.28562	2.01797	2.32781	1.21569	0.110714	AB		1	4
YDR404C	RPB7	2.67589	0.2882	0.0427232	0.717224	-0.742577	-1.8928	AB		1	5
YGR063C	SPT4	4.56653	2.22747	2.05097	1.73648	1.67663	0.398814	AB		2	6
YML010W	SPT5	4.08837	2.37248	2.03258	2.35491	1.50582	0.419042	AB		2	7
YKL160W	ELF1	4.24592	2.27136	1.45487	1.89691	2.10925	-0.220611	AB		2	8
YGL207W	SPT16	3.67958	2.24004	2.33223	0.919111	0.628503	-0.17333	AB		2	9
YML069W	POB3	3.3998	1.98304	2.06007	1.30333	0.451575	0.214825	AB		2	10
YPR052C	NHP6A	2.90641	5.1348	4.47213	0.575348	3.25838	2.09551	AB		2	11
YBR089C-A	NHP6B	2.11196	4.89565	4.14353	-0.532859	3.61713	2.64813	AB		2	12
YBR279W	PAF1	1.69226	0.992327	0.677658	-0.197105	-0.071045	-0.756306	AB		2	13
YGL244W	RTF1	1.56402	1.22835	0.646962	-0.601747	0.498891	-0.966401	AB		2	14
YOR123C	LEO1	1.87073	1.04991	1.19691	-0.30797	-0.983311	-0.619286	AB		2	15
YOL145C	CTR9	2.1488	0.914729	0.625586	-0.499279	-0.747158	-3.01903	AB		2	16
YPR133C	SPN1	4.29858	2.62608	2.61477	1.66849	2.05662	1.52929	AB		2	17
YGR116W	SPT6	4.43378	2.45167	2.23862	2.06109	1.38144	1.13034	AB		2	18
YGL097W	SRM1	1.97575	4.51636	4.15621	0.591825	2.61779	2.29186	AB		2	19
YER063W	THO1	1.15964	3.0789	2.50132	-1.19825	0.975469	1.5594	AB		2	20
YIL101C	XBP1	-0.664084	1.25469	0.1874	-2.12595	-1.00613	-1.84802	AC		3	21
YOR052C	TMC1	0.562469	0.666128	0.480936	-0.830807	-1.29824	-0.799301	C		0	22
YOR230W	WTM1	1.13779	0.479204	0.750721	0.293105	-0.146686	-1.0908	AC		3	23
YLR182W	SWI6	-0.0119149	0.818499	0.612023	-1.71602	-0.569023	-2.34011	AC		3	24
YEL007W	MIT1	0.0316874	1.1995	0.616431	-2.49422	-0.179461	-0.875952	AC		3	25
YPL128C	TBF1	0.189482	0.960318	1.96799	-2.38112	-0.389115	0.570981	AC		3	26
YMR043W	MCM1	0.326249	1.51771	1.24235	-2.16448	-0.781964	-0.396096	AC		3	27
YKL112W	ABF1	0.586623	1.45553	1.45318	-1.56818	-0.0616353	0.234882	AC		3	28
YOR298C-A	MBF1	2.44164	2.83574	2.1423	0.100459	1.31187	0.835299	AC		3	29
YBR049C	REB1	0.334472	0.517155	1.32777	-2.30427	-1.6064	-0.962292	AC		3	30
YIL131C	FKH1	0.235255	0.35123	0.0679156	-2.02717	-1.11569	-1.758			0	31
YCR065W	HCM1	-0.368848	-0.581206	-0.571999	-2.68365	-2.33902	-2.39931			0	32
YNL068C	FKH2	-0.0404937	0.116662	-0.174205	-1.50941	-1.07936	-2.35768			0	33
YNL216W	RAP1	NA	NA	1.3022	NA	NA	NA			0	34
YAL051W	OAF1	-0.831932	-0.230132	-0.651794	-3.05492	-0.910975	-3.04119			0	35
YDL106C	PHO2	-0.3448	0.432661	0.376756	-2.64093	-1.2459	-2.52599			0	36
YMR037C	MSN2	-0.833302	-0.255095	0.0231263	-2.31801	-2.23988	-2.72202			0	37
YER088C	DOT6	-0.487909	-0.0327396	-0.487754	-2.52469	-1.0482	-2.69918			0	38
YMR182C	RGM1	-0.141297	-0.261481	-0.478921	-2.77922	-2.12452	-2.70354			0	39
YER111C	SWI4	-0.191228	-0.166485	-0.418829	-1.63338	-1.5888	-3.1067			0	40
YDR005C	MAF1	-0.224264	-0.0903938	-0.13844	-2.26203	-2.61727	-1.95684			0	41
YML027W	YOX1	-0.784863	-0.397614	-0.560713	-2.33048	-2.432	-3.20179			0	42
YDR451C	YHP1	-0.346787	-0.155517	-0.632604	-1.90812	-1.42209	-2.42394			0	43
YIR018W	YAP5	-0.858103	-0.361153	-0.618428	-2.59961	-2.03155	-3.07173			0	44
YOR229W	WTM2	-0.0635593	-0.191797	-0.335899	-2.01601	-1.42429	-4.29758			0	45
YDR146C	SWI5	-0.540866	-0.333582	-0.559648	-2.82291	-1.49223	-1.947			0	46
YDR463W	STP1	-0.571874	-0.577039	-0.510481	-3.15496	-2.98922	-4.21388			0	47
YMR179W	SPT21	-0.418766	-0.432226	-0.223721	-2.48351	-1.81736	-1.12091			0	48
YPR065W	ROX1	-0.0564256	0.258425	-0.266659	-2.07448	-1.32351	-1.82014			0	49
YKL032C	IXR1	0.850053	-0.314846	-0.32517	1.02452	-2.16938	-2.00819			0	50
YPL075W	GCR1	-0.415384	-0.535307	-0.284567	-1.93978	-2.8159	-2.26891			0	51
YEL009C	GCN4	-0.513614	-0.433641	-0.450335	-3.18414	-2.471	-2.9723			0	52
YBR239C	ERT1	NA	NA	NA	NA	NA	NA			0	53
YGL071W	AFT1	-0.455207	-0.157466	-0.225519	-2.46405	-1.40621	-1.93131			0	54
YDR216W	ADR1	-0.542136	-0.334623	-0.422618	-2.18749	-2.03739	-2.40838			0	55
YER159C	BUR6	1.13362	2.09116	1.65169	-0.0690493	0.570048	0.374473	AC		3	56
YDR397C	NCB2	0.648929	1.33682	0.82523	-1.69664	-0.30012	-0.837616	AC		3	57
YNL330C	RPD3	-0.309674	1.24904	1.09895	-2.56972	0.135521	-0.219608	AC		3	58
YOL004W	SIN3	0.261714	1.68687	1.44932	-2.16766	0.0788362	-0.668734	AC		3	59
YPL139C	UME1	-0.182172	1.66434	1.78883	-2.20003	0.651557	0.138621	AC		3	60
YMR053C	STB2	-0.433698	-0.406947	-0.502145	-1.06857	-1.92701	-2.02194			0	61
YGL131C	SNT2	-0.846108	-0.268623	-0.351206	-2.843	-1.6667	-2.72921			0	62
YMR176W	ECM5	-0.490551	-0.110507	-0.287724	-2.55694	-1.60377	-2.92907			0	63
YKL185W	ASH1	-0.724934	-0.50051	-0.706422	-3.15922	-2.05042	-1.99235			0	64
YIL084C	SDS3	-0.755808	-0.0381234	-0.403101	-2.95091	-1.03427	-2.57875			0	65
YMR263W	SAP30	-0.430432	1.28729	0.787901	-2.29183	-0.852185	-0.64784	AC		3	66
YNL097C	PHO23	-0.690504	1.25165	0.778654	-2.76068	-0.285171	-1.76713	AC		3	67
YBR095C	RXT2	-0.131336	0.538528	0.755494	-2.14209	-0.409938	-0.68589	AC		3	68
YDL076C	RXT3	-0.398159	0.562984	0.973896	-2.13919	-1.17808	-1.54855	AC		3	69
YPL181W	CTI6	-0.5033	0.93061	0.31014	-3.01198	-1.0814	-1.42443	AC		3	70
YDR207C	UME6	-0.239734	0.214989	0.149833	-2.76498	-1.04779	-1.24379	AC		3	71
YMR075W	RCO1	0.00347564	-0.34932	0.341318	-1.98482	-3.27434	-1.57321			0	72
YPR023C	EAF3	-0.87781	-0.319849	-0.577449	-2.95552	-1.81106	-2.00216			0	73
YPL127C	HHO1	0.325013	2.75898	3.18232	-1.51747	1.58047	2.29859	AC		3	74
YDR174W	HMO1	1.35443	4.1974	3.66709	0.818975	4.41889	3.79735	AC		3	75
YER161C	SPT2	1.7694	0.0900021	0.410936	-0.117701	-1.27168	-1.36232	AC		3	76
YPL082C	MOT1	0.885371	1.1522	0.454331	-0.421298	-0.234343	-1.29662	A		3	77
YMR039C	SUB1	0.838466	0.626691	0.670573	-1.53424	-0.926219	-1.28616	A		3	78
YLR226W	BUR2	0.763848	-0.0123227	0.0938431	-1.38121	-2.03852	-1.30005	A		3	79
YPR161C	SGV1	0.166284	-0.216265	-0.311924	-2.12684	-1.34099	-2.48073	A		3	80
YCR084C	TUP1	0.269098	0.989149	1.44517	-2.10412	-0.844701	-0.134105	A		3	81
YBR112C	CYC8	0.327132	0.2647	0.84135	-1.41149	-1.26466	-1.69931	A		3	82
YKL005C	BYE1	0.0269507	0.544789	0.0156481	-1.80289	-0.979178	-2.45995	A		3	83
YKL058W	TOA2	-0.607611	-0.16073	-0.687006	-2.37858	-1.52615	-3.66029			0	84
YPR086W	SUA7	0.326212	0.00695148	0.427423	-1.85813	-1.21077	-0.324502	A		4	85
YDR167W	TAF10	-0.196181	-0.536598	-0.76205	-1.63479	-2.62875	-3.18728			0	86
YDL070W	BDF2	-0.339072	-0.280907	-0.538899	-2.30359	-2.2119	-2.59348			0	87
YML098W	TAF13	-0.268558	0.592441	0.25478	-1.87438	-0.97873	-1.54175	A		4	88
YDR145W	TAF12	-0.0298397	0.453865	1.15153	-2.36526	-0.424588	-0.888919	A		4	89
YGR274C	TAF1	0.0279041	0.102175	0.515451	-3.24124	-1.67976	-2.51256	A		4	90
YCR042C	TAF2	-0.262158	0.299366	0.193479	-2.21619	-1.42789	-1.98352	A		4	91
YPL011C	TAF3	-0.432456	-0.0744238	0.221543	-2.634	-1.16339	-1.10041	A		4	92
YMR005W	TAF4	-0.050587	0.028807	1.18442	-2.10345	-1.67851	0.23999	A		4	93
YBR198C	TAF5	-0.00631222	0.230907	1.29969	-1.75262	-0.73206	-1.82349	A		4	94
YGL112C	TAF6	0.114616	0.825178	1.46319	-2.59882	-0.918784	-0.307357	A		4	95
YMR227C	TAF7	-0.0914716	0.291454	0.568654	-2.68908	-1.79712	-0.72147	A		4	96
YML114C	TAF8	-0.351399	0.00859458	0.480265	-2.36642	-1.91243	-1.13885	A		4	97
YMR236W	TAF9	-0.0155094	0.630998	1.44099	-2.79189	-0.955796	-0.664019	A		4	98
YLR399C	BDF1	0.976424	2.27285	2.65091	-2.28769	0.0640745	1.03625	A	E	4	99
YPL129W	TAF14	-0.286493	0.142166	-0.166875	-2.3409	-1.35241	-1.03938			0	100
YKL028W	TFA1	0.403794	0.23352	0.291931	-2.18289	-1.5943	-1.41879	A	E	4	101
YKR062W	TFA2	2.37461	0.702513	1.14246	-0.286239	-1.20254	-1.77941	A	E	4	102
YGR005C	TFG2	-0.489652	-0.516823	-0.626057	-2.15909	-2.7717	-2.91059			0	103
YGR186W	TFG1	0.431464	0.295404	0.694069	-2.14676	-0.934034	-1.00352	A		4	104
YOR352W	TFB6	-0.408379	0.235872	0.164437	-2.49739	-1.24373	-1.67064			0	105
YDR311W	TFB1	NA	NA	NA	NA	NA	NA			0	106
YDR079C-A	TFB5	-0.582713	-0.284467	-0.547383	-3.1732	-1.85322	-2.02862	A		4	107
YIL143C	SSL2	3.26692	1.59013	1.26556	0.510249	-0.138187	-0.600917	A	E	4	108
YLR005W	SSL1	0.253041	0.138934	0.154785	-2.15102	-1.51862	-1.8883	A	E	4	109
YPR025C	CCL1	-0.122616	0.0750446	0.152104	-2.24322	-2.70281	-2.36269	A		4	110
YER171W	RAD3	0.219936	-0.131509	0.361422	-1.8804	-1.82065	-1.48507	A	E	4	111
YDL108W	KIN28	-0.0661061	0.193443	0.258241	-2.49243	-1.13411	-2.05868	A		4	112
YPL122C	TFB2	0.042909	0.0482934	0.247515	-2.41087	-1.14503	-1.36142	A	E	4	113
YDR460W	TFB3	0.109261	0.07682	0.390634	-2.47332	-2.20437	-1.62069	A	E	4	114
YPR056W	TFB4	0.373344	0.0673044	0.367102	-2.85173	-1.32117	-1.39321	A	E	4	115
YAL001C	TFC3	-0.297335	0.0749814	0.470077	-2.64032	-1.2395	-1.49144			0	116
YGL122C	NAB2	1.46112	2.40199	2.04053	0.508477	-0.492975	0.94039	A		5	117
YGL044C	RNA15	2.56832	0.530183	0.679888	-0.465611	-0.336567	-0.292361	A		5	118
YOR048C	RAT1	3.45073	0.490491	0.506026	1.03773	-0.133009	-1.02739	A		5	119
YNL251C	NRD1	2.20221	0.515415	0.941531	0.144013	-1.16833	-1.03182	A		5	120
YPL190C	NAB3	1.58269	0.82176	0.918876	-0.75411	-0.817405	-1.52406	A		5	121
YER165W	PAB1	-0.371492	-0.231133	-0.135909	-2.80989	-1.45529	-1.15862			0	122
YNL016W	PUB1	0.623791	0.392392	0.43402	-1.6666	-1.3478	-1.5539	A		5	123
YCL011C	GBP2	0.78353	-0.0524419	-0.522013	-1.86801	-1.94802	-2.24074	A		5	124
YNL004W	HRB1	1.4023	0.0558754	0.129648	0.118048	-1.21252	-1.55519	A		5	125
YKL018W	SWD2	0.370434	-0.0441913	-0.321318	-1.7919	-0.592471	-2.57159			0	126
YNL112W	DBP2	2.54702	-0.35262	-0.0172667	0.0103164	-2.26124	-2.33126	A		5	127
YDR289C	RTT103	2.13609	0.118599	0.135324	-0.915556	-1.03781	-2.72219	A		5	128
YDR228C	PCF11	2.12415	0.203772	-0.0574466	-0.552889	-0.770073	-1.23993	A		5	129
YMR061W	RNA14	2.69821	0.395356	0.275585	2.38191	-1.07849	-1.37213	A		5	130
YLR115W	CFT2	1.23324	0.0488378	0.167127	-0.771906	-2.06991	-1.76347	A		5	131
YDR195W	REF2	1.27794	0.15772	0.0913388	-0.530107	-1.0232	-1.44152	A		5	132
YNL317W	PFS2	1.51532	-0.041293	0.205615	-1.14654	-1.82141	-0.860167	A		5	133
YLR277C	YSH1	1.32325	-0.102609	-0.116943	-1.44929	-1.6766	-2.07212	A		5	134
YGR156W	PTI1	1.35135	0.00381925	-0.0813328	-0.870435	-1.75131	-2.44793	A		5	135
YKR002W	PAP1	1.43772	0.697097	0.886315	-1.76755	-0.916374	-0.978448	A		5	136
YJR093C	FIP1	0.979008	0.0772533	0.27626	-1.439	-1.54098	-1.61792	A		5	137
YDR301W	CFT1	0.840685	-0.144526	0.315607	-0.471613	-2.11863	-1.17629	A		5	138
YPR107C	YTH1	0.849171	-0.296271	0.0867967	-2.18217	-2.20738	-2.08673	A		5	139
YKL059C	MPE1	1.03164	0.248388	0.0521969	-0.253294	-0.860816	-1.72169	A		5	140
YLR430W	SEN1	0.754934	-0.438296	-0.401644	-0.662597	-2.48429	-2.14699	A		5	141
YOR179C	SYC1	0.520606	-0.313117	-0.151852	-2.08394	-2.49161	-1.78893	A		5	142
YJL006C	CTK2	0.433112	0.153059	0.0738782	-2.08029	-1.93776	-2.88962			0	143
YKL139W	CTK1	0.333994	-0.0581175	-0.246174	-1.29751	-1.9202	-1.54449			0	144
YDR443C	SSN2	-0.128362	-0.370829	-0.626333	-2.83385	-2.40046	-2.63913			0	145
YCR081W	SRB8	-0.608566	-0.233219	-0.0932216	-2.23796	-1.38628	-1.66591			0	146
YDR308C	SRB7	-0.537511	-0.28017	-0.260628	-3.67754	-2.20639	-3.4005			0	147
YBR253W	SRB6	-0.413731	0.0550063	-0.477573	-3.29963	-1.98594	-3.68693			0	148
YGR104C	SRB5	-0.392551	-0.472245	-0.410071	-1.29405	-2.61413	-3.26717			0	149
YER022W	SRB4	-0.286799	-0.0997808	-0.13586	-2.21354	-2.45336	-2.04126			0	150
YHR041C	SRB2	-0.564178	-0.395013	-0.447319	-2.82776	-1.76144	-2.13509			0	151
YGL127C	SOH1	-0.111978	-0.018084	-0.745096	-1.01396	-0.904038	-2.75971			0	152
YNL236W	SIN4	-0.531357	-0.236456	-0.0479376	-2.48534	-1.71499	-1.94745			0	153
YBL093C	ROX3	-0.309528	-0.267894	-0.0384704	-3.42101	-2.02529	-2.3226			0	154
YLR071C	RGR1	-0.0890351	-0.00999747	-0.432981	-1.92309	-1.47001	-3.20476			0	155
YGL025C	PGD1	-0.193228	-0.276402	-0.421209	-1.08149	-1.45974	-2.26749			0	156
YPR168W	NUT2	-0.21544	0.00405524	-0.116309	-2.72366	-2.27879	-2.38613			0	157
YGL151W	NUT1	-0.181191	-0.152859	-0.0922891	-2.59297	-1.48103	-3.09135			0	158
YBR193C	MED8	-0.861334	-0.318219	-0.163778	-2.69222	-1.83581	-1.73656			0	159
YOL135C	MED7	-0.268635	-0.338286	-0.220356	-2.64929	-2.09451	-1.9976			0	160
YHR058C	MED6	-0.249793	-0.0668002	-0.238996	-1.84633	-1.16071	-2.86442			0	161
YOR174W	MED4	-0.294878	-0.0859914	-0.080485	-1.54665	-1.13163	-1.87067			0	162
YDL005C	MED2	-0.34793	-0.340261	-0.0884392	-2.18954	-2.91356	-1.85842			0	163
YMR112C	MED11	-0.511834	0.0718533	-0.358661	-2.305	-1.55164	-1.62437			0	164
YPR070W	MED1	-0.400413	-0.450331	-0.406375	-3.05331	-2.67205	-2.93096			0	165
YOL051W	GAL11	-0.181814	-0.201159	-0.239783	-2.21945	-1.95318	-1.95407			0	166
YNR010W	CSE2	-0.316735	-0.264009	-0.370712	-2.18462	-1.54997	-1.4548			0	167
YPR045C	THP3	0.245367	0.192926	-0.00669184	-1.9322	-1.73808	-2.59649			0	168
YNR052C	POP2	-0.520049	-0.440692	-0.675586	-2.30459	-2.77678	-2.49432			0	169
YAL021C	CCR4	-0.548199	-0.242364	-0.424495	-2.4739	-1.44439	-2.59506			0	170
YFL023W	BUD27	-0.335598	-0.207167	-0.497859	-1.65526	-2.19545	-2.2061			0	171
YLR141W	RRN5	-0.700619	-0.357514	-0.10502	-2.91139	-1.93444	-1.89228			0	172
YDR026C	NSI1	-0.474226	-0.442698	-0.430038	-1.76099	-2.15374	-2.73646			0	173
YOR295W	UAF30	-0.636098	-0.323106	-0.436821	-2.78971	-1.24542	-2.08262			0	174
YNL025C	SSN8	-0.209896	-0.27778	-0.188469	-1.49146	-2.27475	-2.07086			0	175
YJR136C	TTI2	-0.663921	-0.508505	-0.435182	-2.7251	-1.96007	-2.38123			0	176
YKL033W	TTI1	-0.774779	-0.327571	-0.337818	-2.56949	-2.01981	-2.41238			0	177
YGR099W	TEL2	-0.429957	-0.497173	-0.369219	-1.80735	-1.84702	-2.68327			0	178
YER164W	CHD1	0.146224	-0.690807	-0.431251	-2.26423	-3.43861	-2.2775			0	179
YAL019W	FUN30	0.0527761	0.306593	-0.231171	-2.36149	-1.94371	-2.9382	A		6	180
YNL059C	ARP5	0.0352896	1.31756	0.715688	-2.17223	-0.726699	-1.1101	A	F	6	181
YOR141C	ARP8	-0.0148296	1.83901	1.12116	-2.31476	0.043113	-0.58733	A	F	6	182
YDR190C	RVB1	1.49985	1.65267	1.43305	0.943218	-0.684974	-0.815384	A	F	6	183
YPL235W	RVB2	0.0281163	1.00732	0.879549	-2.746	-0.537886	0.576876	A	F	6	184
YEL044W	IES6	0.553248	1.83429	1.34676	-1.71715	-0.810939	0.106039	A	F	6	185
YER092W	IES5	0.0129583	1.85102	1.0372	-0.937801	-0.542936	-0.400568	A	F	6	186
YLR052W	IES3	0.375895	2.10699	0.987178	-1.78237	0.508669	-1.4754	A	F	6	187
YDL002C	NHP10	0.100198	2.55836	1.71056	-2.046	1.08702	0.300063	A	F	6	188
YGL150C	INO80	0.103867	0.914017	0.411061	-2.16018	-0.3983	-1.81793	A	F	6	189
YFL013C	IES1	-0.143387	1.27663	0.498307	-2.14234	-0.423146	-1.09748	A	F	6	190
YNL215W	IES2	-0.0991992	0.552599	0.142848	-2.91217	-0.932691	-2.93879	A	F	6	191
YJL081C	ARP4	-0.0141218	1.45226	0.905308	-1.88666	-0.0431437	-0.804595	A	F	6	192
YOR189W	IES4	0.238926	0.866658	0.324234	-0.922856	-0.562591	-1.94282	A	F	6	193
YBR245C	ISW1	NA	NA	NA	NA	NA	NA			0	194
YFR013W	IOC3	0.312651	0.977348	1.02405	-2.358	-0.719173	-1.06118	A	F	6	195
YMR044W	IOC4	0.364727	1.93417	1.95417	-1.25808	-0.353968	-1.15183	A	F	6	196
YLR095C	IOC2	0.442695	0.982053	1.18794	-1.19159	-0.379446	-0.762046	A	F	6	197
YGL133W	ITC1	-0.239836	1.00312	0.493249	-2.16829	-0.00449797	-1.87632	A		6	198
YJL065C	DLS1	0.0471756	-0.0934256	0.0984729	-2.35061	-2.0838	-1.49902	A		6	199
YOR304W	ISW2	-0.0602991	0.0640574	0.300161	-2.16087	-1.72513	-2.05617	A		6	200
YKR008W	RSC4	-0.330633	-0.471197	-0.501223	-1.76543	-2.27416	-3.39184			0	201
YDR303C	RSC3	0.209358	3.12008	1.65814	-2.07207	2.39178	0.11618	A	F	6	202
YML127W	RSC9	0.323279	2.6963	2.78173	-2.16412	1.72391	0.486667	A	F	6	203
YMR091C	NPL6	0.245283	2.18222	2.53609	-2.29539	0.714422	0.982405	A	F	6	204
YIL126W	STH1	0.283935	2.45698	1.7951	-1.02216	1.27614	-0.417683	A	F	6	205
YFR037C	RSC8	0.701122	3.18769	2.75373	-1.823	2.93609	1.08292	A	F	6	206
YCR020W-B	HTL1	0.628516	2.7123	2.14709	-1.35459	1.42239	0.0992492	A	F	6	207
YLR321C	SFH1	0.406523	2.54625	2.05396	-1.14558	1.62342	0.243591	A	F	6	208
YLR357W	RSC2	0.16963	2.29118	2.43652	-2.12638	0.525859	0.253615	A	F	6	209
YGR056W	RSC1	0.0650058	1.73644	1.44209	-0.982183	0.754058	-1.01822	A	F	6	210
YLR033W	RSC58	0.168556	2.23258	1.92223	-1.94493	0.81187	-0.031928	A	F	6	211
YCR052W	RSC6	0.471529	1.32604	1.92627	0.150517	0.364728	0.0425632	A	F	6	212
YMR033W	ARP9	-0.420122	-0.689702	-0.20825	-1.53746	-2.44994	-2.00296			0	213
YPR034W	ARP7	0.135723	1.84937	2.03738	-2.03109	0.355578	-0.210325	A	F	6	214
YGR275W	RTT102	-0.229944	1.78628	1.16901	-3.35187	-0.0750225	-0.561151	A	F	6	215
YPL016W	SWI1	-0.440747	-0.324712	-0.137437	-2.48708	-1.44794	-1.46851			0	216
YHL025W	SNF6	-0.448514	-0.286809	0.200832	-2.05658	-2.05223	-1.01771			0	217
YOR290C	SNF2	-0.0232533	-0.178473	0.109795	-2.49337	-1.87808	-1.23511			0	218
YJL176C	SWI3	-0.353308	-0.496344	0.127579	-1.72349	-3.0037	-1.58034			0	219
YLR385C	SWC7	-0.372523	-0.104277	-0.763483	-1.97736	-2.14226	-2.90336			0	220
YBR231C	SWC5	-0.324592	-0.0228498	0.0631291	-2.52325	-1.74031	-3.02917			0	221
YLR085C	ARP6	-0.679736	-0.0554214	0.162785	-2.62811	-2.28411	-3.63855			0	222
YAL011W	SWC3	-0.374856	0.538506	0.16784	-3.08222	-0.547422	-1.47321			0	223
YDR485C	VPS72	-0.509881	0.0474176	0.019016	-2.51478	-2.31693	-2.34155			0	224
YML041C	VPS71	-0.562217	0.448794	-0.0304204	-2.95596	-0.933911	-2.38903			0	225
YDR334W	SWR1	-0.472287	0.201262	0.108287	-2.77634	-1.36119	-1.89307			0	226
YGR002C	SWC4	-0.201108	0.0966037	0.287524	-1.65452	-1.96698	-1.29884			0	227
YPL055C	LGE1	0.0894324	0.0676079	-0.0198172	-1.9206	-1.53321	-2.12217			0	228
YDL074C	BRE1	0.507079	-0.143532	0.150714	-2.05568	-0.818653	-1.46588			0	229
YDR440W	DOT1	-0.382236	0.00125678	-0.407921	-2.40838	-1.65524	-2.99998			0	230
YLL022C	HIF1	-0.605013	-0.608738	-0.50129	-2.37447	-1.93792	-2.36983			0	231
YPR179C	HDA3	-0.138228	-0.0307156	0.265629	-1.94362	-1.49626	-1.37563			0	232
YDR295C	HDA2	-0.0926397	-0.494	-0.20244	-2.55451	-2.46668	-2.26801			0	233
YNL021W	HDA1	0.033611	-0.222097	0.127077	-2.40474	-2.09191	-2.17399			0	234
YDR266C	HEL2	0.13496	0.268404	0.296359	-2.36617	-1.57042	-1.65508			0	235
YKR017C	HEL1	-0.289374	-0.326399	-0.601817	-1.68755	-2.78097	-1.76119			0	236
YPL116W	HOS3	-0.470056	-0.461098	-0.382192	-2.45528	-1.69407	-2.07606			0	237
YPR068C	HOS1	-0.573405	-0.548103	-0.713578	-2.72408	-2.4675	-2.97826			0	238
YDR191W	HST4	-0.615055	-0.503186	-0.584498	-3.10772	-2.54265	-1.94537			0	239
YOR025W	HST3	-0.514878	-0.374551	-0.498627	-3.32801	-2.02648	-2.13677			0	240
YPL015C	HST2	-0.645792	-0.381939	-0.114263	-1.9173	-1.40862	-2.30432			0	241
YER169W	RPH1	-0.350869	0.129639	-0.141329	-2.86612	-2.09676	-2.72495			0	242
YJR119C	JHD2	-0.488426	-0.687846	-0.376355	-2.90831	-3.4483	-2.12452			0	243
YER051W	JHD1	-0.627139	-0.500418	-0.550411	-3.21664	-3.3272	-1.66777			0	244
YDR096W	GIS1	-0.419437	0.326526	0.483967	-2.50685	-1.51371	-1.32743			0	245
YBL052C	SAS3	-0.102134	0.3061	0.301971	-1.74285	-2.39565	-2.36334			0	246
YPR031W	NTO1	-0.143912	0.37484	0.295982	-2.82605	-1.72788	-1.11443	A		6	247
YLR455W	PDP3	0.00905855	0.33867	0.417065	-1.97155	-1.22788	-1.7327	A		6	248
YOR064C	YNG1	-0.399466	0.773618	0.289799	-2.30026	-1.54489	-1.60463	A		6	249
YHR090C	YNG2	-0.52094	-0.375039	0.0228533	-2.10731	-2.69192	-2.18763			0	250
YNL107W	YAF9	-0.696685	-0.243874	-0.495077	-2.75479	-2.15953	-2.09195			0	251
YOR244W	ESA1	-0.172571	-0.19438	0.00701431	-2.388	-2.18792	-1.25795			0	252
YFL024C	EPL1	-0.562856	-0.248696	-0.117883	-2.56704	-2.20624	-3.10893			0	253
YNL136W	EAF7	-0.0766505	-0.00626714	0.104601	-1.72795	-1.51695	-1.84512			0	254
YEL018W	EAF5	-0.583689	-0.266846	0.22081	-2.21213	-1.35092	-1.41659			0	255
YJR082C	EAF6	-0.40628	0.486463	0.504722	-1.75764	-1.19365	-1.09947	A		6	256
YMR231W	PEP5	-0.654326	-0.332548	-0.38072	-2.22283	-2.28267	-1.98903			0	257
YDR075W	PPH3	-0.661815	-0.334862	-0.470723	-2.44984	-2.56331	-1.70259			0	258
YNL201C	PSY2	0.128377	0.420023	-0.360007	-1.85221	-0.369477	-4.34344	A		6	259
YGL194C	HOS2	-0.428986	-0.0956964	-0.159615	-2.21594	-1.71232	-1.26226			0	260
YMR223W	UBP8	-0.356632	-0.186188	-0.0796989	-2.5336	-2.03564	-1.76368			0	261
YLR055C	SPT8	-0.672119	-0.512961	-0.247259	-2.02781	-2.10801	-2.29363			0	262
YBR081C	SPT7	-0.343104	-0.610667	0.122126	-3.52376	-2.3881	-1.23346			0	263
YDR392W	SPT3	-0.593296	-0.0312464	-0.107607	-2.50746	-2.08817	-2.87705			0	264
YOL148C	SPT20	-0.341985	-0.369492	-0.245047	-1.84223	-2.21426	-2.27595			0	265
YGL066W	SGF73	-0.337842	-0.207946	0.0136308	-2.41058	-1.29934	-1.91778			0	266
YCL010C	SGF29	-0.000578032	-0.262028	0.0771788	-2.02292	-2.3936	-2.39578			0	267
YPL047W	SGF11	-0.401487	0.399239	-0.40886	-2.82296	-0.865357	-2.50069			0	268
YDR176W	NGG1	-0.239448	0.139918	0.267835	-2.79958	-1.38827	-1.98521			0	269
YPL254W	HFI1	-0.192295	-0.306644	-0.022488	-1.59348	-3.21825	-1.45184			0	270
YGR252W	GCN5	-0.0956587	0.0874978	-0.113684	-1.7947	-1.84562	-1.642			0	271
YCR082W	AHC2	-0.387163	-0.362404	-0.31565	-2.33706	-2.88866	-2.02265			0	272
YOR023C	AHC1	-0.487867	-0.253896	-0.311706	-2.30753	-1.86716	-2.97457			0	273
YDR448W	ADA2	-0.194877	-0.149746	0.100002	-2.49641	-1.86876	-1.93152			0	274
YOR213C	SAS5	-0.564096	-0.286882	-0.335614	-2.93981	-2.20968	-1.76021			0	275
YDR181C	SAS4	-0.288946	0.0644173	-0.485721	-2.62758	-1.72361	-2.37811			0	276
YMR127C	SAS2	-0.521818	-0.264454	-0.58528	-1.61387	-2.11972	-3.53483			0	277
YBR175W	SWD3	-0.153151	-0.525982	-0.574669	-1.76107	-1.67239	-2.80097			0	278
YAR003W	SWD1	0.0133555	-0.463281	-0.238665	-3.23786	-2.38153	-2.58497			0	279
YPL138C	SPP1	0.00796879	-0.295288	-0.185009	-1.36664	-1.01162	-1.11575			0	280
YBR258C	SHG1	-0.0210126	-0.274394	-0.289444	-2.87555	-1.73383	-3.05774			0	281
YHR119W	SET1	0.0102335	-0.48249	-0.657398	-2.17935	-1.50705	-2.97226			0	282
YDR469W	SDC1	-0.0239403	-0.298162	-0.365311	-1.16008	-2.6225	-2.71563			0	283
YLR015W	BRE2	0.00327541	-0.229832	-0.601727	-1.32728	-1.56446	-2.44727			0	284
YJL168C	SET2	-0.293411	-0.561147	-0.669875	-2.13335	-2.62758	-4.87596			0	285
YCR033W	SNT1	-0.391655	0.0062754	-0.0302953	-1.93258	-2.5246	-2.1077			0	286
YBR103W	SIF2	-0.124355	0.435514	0.141431	-1.95584	-1.0021	-1.58996			0	287
YKR029C	SET3	-0.204647	0.0541066	-0.01219	-3.43805	-1.48708	-2.78305			0	288
YIL112W	HOS4	-0.589698	0.0613768	0.007225	-2.14803	-1.92268	-2.15185			0	289
YHR207C	SET5	-0.457306	-0.323103	0.0910636	-2.14053	-2.07228	-1.91189			0	290
YDR227W	SIR4	-0.677836	-0.589639	-0.0763738	-2.08933	-1.78177	-1.77685			0	291
YDL042C	SIR2	-0.673225	-0.243761	-0.49124	-2.97604	-2.83378	-2.68612			0	292
YLR442C	SIR3	-0.505052	0.627927	0.22328	-3.51856	0.00838383	-1.02972	A		6	293
YJL127C	SPT10	-0.4267	-0.411071	-0.493617	-2.32794	-2.18968	-2.10372			0	294
YOR279C	RFM1	-0.373671	-0.0338657	0.00803258	-2.9559	-1.84937	-2.08154			0	295
YOL068C	HST1	-0.107784	0.41085	-0.111707	-2.3798	-0.87047	-0.722164	A		6	296
YDR310C	SUM1	-0.226613	-0.136819	-0.359019	-1.75372	-2.52044	-1.49817	A		6	297
YNL186W	UBP10	-0.245605	0.17632	-0.541918	-2.17182	-0.13513	-2.7592			0	298
YPR018W	RLF2	-0.0710674	-0.0679567	-0.481799	-1.63162	-1.81446	-3.58824			0	299
YML102W	CAC2	-0.485536	-0.189814	-0.111578	-3.38444	-1.50879	-2.29095			0	300
YBR195C	MSI1	-0.314217	-0.20587	-0.319033	-1.93968	-1.72486	-2.04748	A		6	301
YER030W	CHZ1	NA	-0.215365	-0.171916	NA	-3.17849	-2.23826			0	302
YJR140C	HIR3	0.0453869	1.13891	0.577237	-2.07949	0.00398628	-2.98627	A		6	303
YBR215W	HPC2	-0.120387	-0.201222	0.0682289	-2.28061	-1.86449	-1.3262	A		6	304
YOR038C	HIR2	-0.0840519	-0.0660203	-0.172412	-2.18317	-2.39412	-1.56296	A		6	305
YBL008W	HIR1	-0.457714	0.22866	-0.118101	-2.97449	-1.2327	-1.97857	A		6	306
YKR048C	NAP1	-0.45158	-0.353994	-0.172331	-1.981	-1.93522	-1.37965			0	307
YPL153C	RAD53	-0.36481	-0.291798	-0.522928	-2.50298	-2.5205	-3.37492			0	308
YJL115W	ASF1	0.596658	0.583354	0.268799	-2.43299	-0.710466	-2.65083	A		6	309
YNL206C	RTT106	0.0785912	-0.228212	-0.0686245	-2.92176	-1.64031	-1.22197	A		6	310
YNL246W	VPS75	0.310662	-0.112275	0.163089	-0.906264	-1.77571	-1.85043			0	311
YLL002W	RTT109	-0.269757	0.192876	-0.278539	-2.92868	-0.8323	-2.45182			0	312
YER177W	BMH1	0.79588	0.861481	1.72637	-1.71194	-0.494978	0.589353	A		0	313
YDR099W	BMH2	0.138619	1.01151	1.33437	-1.81269	0.13611	0.112048	A		0	314
YGL240W	DOC1	-0.683932	-0.605049	-0.15321	-2.89768	-2.88974	-3.1909			0	315
YFR036W	CDC26	-0.701357	-0.734741	-0.656348	-2.4041	-3.28792	-2.13817			0	316
YKL022C	CDC16	-0.416686	-0.459167	-0.166283	-1.85293	-2.29928	-2.1585			0	317
YGL060W	YBP2	-0.518395	-0.385758	-0.392397	-2.80664	-3.1633	-2.66766			0	318
YMR117C	SPC24	-0.294819	-0.573557	-0.527519	-2.97779	-1.81211	-2.29128			0	319
YDL139C	SCM3	NA	NA	NA	NA	NA	NA			0	320
YDR318W	MCM21	-0.587049	-0.194416	-0.403744	-1.94983	-2.12348	-2.52073			0	321
YDR532C	KRE28	NA	NA	NA	NA	NA	NA			0	322
YPL209C	IPL1	-0.416241	-0.549432	-0.484718	-2.82144	-2.23479	-2.23996			0	323
YIR010W	DSN1	-0.686266	-0.71211	-0.596622	-2.77583	-2.80792	-1.65887			0	324
YLR223C	IFH1	-0.2904	-0.243377	-0.454875	-1.64856	-1.67604	-3.10762			0	325
YOL104C	NDJ1	-0.246595	-0.275132	-0.49054	-2.35608	-2.24286	-2.29371			0	326
YBR057C	MUM2	-0.716632	-0.208624	-0.641943	-2.96893	-1.52274	-2.38581			0	327
YDR439W	LRS4	-0.672293	-0.426186	-0.401982	-2.6773	-2.14896	-1.82567			0	328
YPL204W	HRR25	-0.0171607	-0.106772	-0.28558	-2.27472	-1.18046	-2.82059			0	329
YCR086W	CSM1	-0.726658	-0.507722	-0.29193	-3.52768	-2.33457	-1.61538			0	330
YDL116W	NUP84	-0.385717	-0.271127	-0.483729	-1.63997	-1.67062	-2.02006			0	331
YAR002W	NUP60	-0.683998	-0.39941	-0.473303	-3.2102	-2.61911	-3.13027			0	332
YBL079W	NUP170	-0.567949	-0.195328	-0.878788	-2.76545	-1.29726	-3.62611			0	333
YGL092W	NUP145	-0.588872	-0.373093	-0.177854	-3.22666	-2.32043	-2.5802			0	334
YKR082W	NUP133	-0.0278249	-0.592618	-0.518388	-0.650161	-2.17797	-2.98322			0	335
YIL122W	POG1	-0.370459	0.00242124	-0.284762	-2.45682	-1.31662	-2.43753			0	336
YJL076W	NET1	-0.389909	-0.331714	-0.0852908	-2.16047	-1.67629	-2.42307			0	337
YFR028C	CDC14	-0.732041	-0.046361	-0.368674	-2.85267	-1.80002	-1.60918			0	338
YBR275C	RIF1	-0.641652	-0.542032	-0.317558	-2.13262	-2.5018	-1.4339			0	339
YLR453C	RIF2	-0.479294	-0.605401	-0.629926	-2.49024	-2.50716	-3.71417			0	340
YIL132C	CSM2	-0.499944	-0.514715	-0.422121	-2.35153	-2.63591	-2.10398			0	341
YLR383W	SMC6	-0.236482	-0.0593747	-0.23549	-2.1988	-1.54498	-2.36124			0	342
YOL034W	SMC5	-0.193929	-0.433711	-0.429762	-1.98031	-2.25728	-2.06142			0	343
YML023C	NSE5	-0.563655	-0.522944	-0.474904	-2.62928	-2.85516	-1.7612			0	344
YDL105W	NSE4	0.0304595	-0.504511	-0.462061	-2.82359	-2.50961	-1.75887			0	345
YDR288W	NSE3	-0.117147	-0.633999	-0.296964	-2.19811	-2.59867	-2.31354			0	346
YEL019C	MMS21	-0.018442	-0.296798	-0.596275	-1.76161	-1.53168	-1.95717			0	347
YER038C	KRE29	-0.619739	-0.440016	-0.318008	-2.45568	-2.09652	-2.45315			0	348
YGR270W	YTA7	0.379889	-0.270108	-0.393378	-2.22426	-2.42568	-2.48455	A		6	349
YKR010C	TOF2	-0.20251	-0.285973	-0.479293	-1.86946	-2.21908	-2.37825			0	350
YPR104C	FHL1	-0.55086	-0.412954	-0.584338	-2.2055	-2.72054	-3.24087			0	351
YOL017W	ESC8	-0.60702	-0.303822	-0.371391	-2.28356	-1.94332	-1.90813			0	352
YDL156W	CMR1	0.237134	0.195301	-0.0695799	-1.53134	-1.23294	-2.01417			0	353
YGL029W	CGR1	0.224157	-0.43383	-0.471117	-1.9328	-2.0062	-2.14008			0	354
YDL197C	ASF2	-0.440749	-0.406208	-0.433893	-1.82676	-2.5231	-3.19424			0	355
YPL008W	CHL1	-0.416895	-0.0878566	-0.572867	-1.5324	-1.47977	-2.5126			0	356
YER147C	SCC4	-0.674904	-0.452286	-0.461264	-2.70545	-2.045	-1.698			0	357
YDR180W	SCC2	-0.12278	-0.415225	-0.612862	-1.70757	-2.25598	-2.22124			0	358
YDR014W	RAD61	-0.145121	-0.467153	-0.379951	-2.20978	-2.37761	-2.82799			0	359
YLR272C	YCS4	-0.226359	-0.476325	-0.189594	-3.80051	-2.97141	-2.21303			0	360
YDR325W	YCG1	-0.380911	-0.415489	-0.932796	-1.48703	-2.18826	-2.76794			0	361
YLR086W	SMC4	-0.221307	-0.180194	-0.463006	-2.76618	-1.36499	-2.20117			0	362
YFR031C	SMC2	-0.255667	-0.30718	-0.399453	-2.27025	-1.96261	-1.98679			0	363
YBL097W	BRN1	-0.402207	-0.124908	-0.397691	-2.56707	-2.52239	-3.4557			0	364
YJL074C	SMC3	1.01695	0.304742	0.203295	-1.02164	-0.538944	-1.56699	A		7	365
YFL008W	SMC1	1.04492	-0.276005	0.248024	-1.2741	-1.76678	-0.491249	A		7	366
YDL003W	MCD1	1.15646	-0.283131	-0.0340924	-1.15126	-1.94089	-2.06186	A		7	367
YIL026C	IRR1	1.1281	-0.149854	0.594468	-0.49286	-2.98089	-1.07365	A		7	368
YPR135W	CTF4	0.313465	0.148093	-0.0743538	-0.917983	-1.28711	-1.14907	A		7	369
YMR076C	PDS5	1.53505	0.415003	0.413865	-0.400772	-0.562931	-2.62995	A		7	370
YPR120C	CLB5	-0.0372195	-0.253635	-0.0284238	-1.66231	-2.54491	-1.64595			0	371
YCL016C	DCC1	-0.2574	-0.266533	-0.307653	-2.63604	-2.33732	-2.66307			0	372
YMR078C	CTF18	-0.122344	-0.214283	-0.178694	-2.39484	-1.7262	-1.5468			0	373
YDR052C	DBF4	-0.676724	-0.370175	-0.493935	-2.28497	-2.35794	-2.25828			0	374
YDL017W	CDC7	-0.354462	-0.568012	-0.723078	-3.1749	-2.34545	-3.53602			0	375
YGL090W	LIF1	-0.176014	-0.546235	-0.569814	-1.90198	-2.30216	-2.26382			0	376
YDR419W	RAD30	-0.447133	-0.584922	-0.513639	-2.67616	-2.52434	-1.52194			0	377
YIR008C	PRI1	-0.412186	-0.0217606	-0.467276	-2.51618	-0.823262	-1.89145			0	378
YJR043C	POL32	-0.178075	-0.29079	-0.140088	-1.38365	-2.01564	-2.23421			0	379
YJR006W	POL31	-0.0836302	-0.434025	-0.291542	-1.32095	-1.70343	-1.6757			0	380
YNL262W	POL2	0.407278	-0.133876	0.1906	-1.6035	-3.02725	-0.510705			0	381
YBL035C	POL12	0.359702	-0.346575	-0.527881	-2.24916	-1.55625	-3.77322			0	382
YNL102W	POL1	0.296115	-0.461438	-0.481287	-2.10498	-1.97005	-2.30816			0	383
YKL017C	HCS1	-0.760672	-0.365031	-0.683323	-3.08344	-1.56183	-2.51573			0	384
YDR121W	DPB4	-0.119544	-0.0468732	0.408076	-1.59317	-1.52604	-1.16198			0	385
YBR278W	DPB3	0.000210403	-0.33445	-0.365438	-2.02766	-2.09506	-2.02519			0	386
YPR175W	DPB2	0.420584	-0.663377	-0.713694	-0.642745	-2.36779	-3.13967			0	387
YKL108W	SLD2	0.548325	-0.457287	-0.780769	-2.01528	-1.94891	-2.49667			0	388
YJL090C	DPB11	-0.0101924	-0.0403205	-0.455216	-1.55994	-1.38944	-2.31004			0	389
YOR144C	ELG1	-0.359492	-0.397492	-0.412148	-2.81176	-2.27318	-1.89315			0	390
YOL146W	PSF3	0.341977	-0.141682	-0.36793	-1.84104	-1.09091	-1.67553			0	391
YDR013W	PSF1	0.0825019	-0.653974	-0.218097	-2.03381	-2.99749	-1.62691			0	392
YJL072C	PSF2	0.223987	-0.206336	-0.53832	-1.28808	-1.65244	-2.47882	A		7	393
YLR274W	MCM5	1.78582	-0.505024	0.907123	-0.399544	-3.51688	0.349582	AD		7	394
YPR019W	MCM4	1.05693	0.00578972	0.119013	0.240573	-1.25482	-1.73521	AD		7	395
YGL201C	MCM6	1.17859	-0.0899022	0.978561	-1.24587	-1.52081	0.402383	AD		7	396
YBL023C	MCM2	1.03754	-0.204347	0.802992	-0.743885	-2.02646	-0.497687	AD		7	397
YIL150C	MCM10	-0.0404176	-0.292667	-0.226766	-2.28554	-1.77177	-2.22749			0	398
YDR386W	MUS81	-0.657117	-0.197517	-0.568662	-2.50125	-1.89455	-2.41824			0	399
YML065W	ORC1	2.74456	4.66082	3.4202	0.882846	3.33287	1.38345	AD		7	400
YBR060C	ORC2	2.86956	4.46741	2.64027	0.836014	1.48449	1.28877	AD		7	401
YNL261W	ORC5	2.1652	4.07036	2.87903	0.143873	1.2383	1.43104	AD		7	402
YHR118C	ORC6	2.36368	3.7025	2.56841	1.58512	2.10032	1.24243	AD		7	403
YAR007C	RFA1	1.49491	0.702826	0.650139	-0.477264	-1.18367	-1.55515	A		7	404
YNL312W	RFA2	1.21391	0.0486498	0.0525017	-1.29775	-1.08589	-1.21833	A		7	405
YJL173C	RFA3	0.97938	0.540776	0.355026	-1.80715	-1.35309	-1.63663	A		7	406
YOL094C	RFC4	-0.33779	-0.437242	-0.209931	-1.7959	-3.00946	-1.53			0	407
YER173W	RAD24	-0.61465	-0.642967	-0.401158	-2.52471	-2.34925	-2.21044			0	408
YBR087W	RFC5	-0.105023	0.345406	0.421223	-1.86191	-0.931284	-1.47883			0	409
YNL290W	RFC3	0.621741	1.45238	1.45186	-1.26581	-0.648984	-0.601497	A		7	410
YJR068W	RFC2	0.456033	1.68406	1.01334	-1.49748	1.34177	-0.84848	A		7	411
YOR217W	RFC1	0.138495	0.730991	0.932909	-1.36178	-0.784927	-0.0314166	A		7	412
YNL273W	TOF1	-0.0414937	-0.138486	-0.449385	-2.27389	-1.98848	-2.30688			0	413
YCL061C	MRC1	-0.123116	-0.738216	-0.485382	-3.59538	-2.51203	-2.94424			0	414
YMR048W	CSM3	-0.570038	-0.102118	0.0136576	-2.56328	-1.85826	-2.32164			0	415
YJR046W	TAH11	-0.0613487	-0.381605	-0.490578	-1.54754	-1.97044	-3.31894			0	416
YOR060C	SLD7	-0.350197	-0.709148	-0.397104	-2.14975	-2.79931	-2.70828			0	417
YGL113W	SLD3	-0.808852	-0.757077	-0.569083	-3.54307	-2.01639	-2.86852			0	418
YOR346W	REV1	NA	NA	NA	NA	NA	NA			0	419
YKL113C	RAD27	0.153826	0.130622	0.320094	-1.25166	-1.83984	-1.31798			0	420
YNL218W	MGS1	-0.650961	-0.355986	-0.262864	-2.35961	-2.0288	-2.04497			0	421
YHR164C	DNA2	-0.340878	-0.52079	-0.692948	-2.41972	-2.1236	-2.60681			0	422
YDL164C	CDC9	-0.336009	-0.44909	-0.716848	-2.16022	-1.80052	-2.47656			0	423
YLR103C	CDC45	0.653573	-0.209736	-0.546485	-0.505079	-2.27746	-2.22885	A		7	424
YOL006C	TOP1	0.637706	0.579751	0.369822	-1.7689	-1.10648	-1.70455	A		7	425
YLR234W	TOP3	-0.507001	-0.613387	-0.32216	-1.36094	-2.19925	-2.49337			0	426
YNL088W	TOP2	0.751958	1.34141	1.01654	-0.990879	-0.25292	-1.43274	A		7	427
YJR035W	RAD26	-0.43513	0.235979	-0.236125	-2.26775	-1.20155	-3.13464			0	428
YKL054C	DEF1	-0.107335	-0.458365	0.0387846	-1.99699	-2.00052	-1.25794			0	429
YMR106C	YKU80	-0.593337	-0.52714	-0.328556	-2.61414	-2.26047	-2.37618			0	430
YMR284W	YKU70	-0.762611	-0.467132	-0.238498	-2.71141	-2.90491	-2.77946			0	431
YNL082W	PMS1	-0.468337	-0.643233	-0.189594	-2.73561	-3.35792	-2.72409			0	432
YCR092C	MSH3	-0.152662	-0.515395	-0.588235	-1.91515	-1.87853	-3.29637			0	433
YLR035C	MLH2	-0.392614	-0.526252	-0.839099	-2.36973	-2.60172	-2.2035			0	434
YMR167W	MLH1	-0.469115	-0.200617	-0.630745	-2.96297	-2.07486	-3.6378			0	435
YDR369C	XRS2	-0.387241	-0.107304	0.093185	-2.35043	-2.22888	-1.75049			0	436
YNL250W	RAD50	-0.460944	-0.170581	-0.60202	-2.44923	-1.33411	-2.65628			0	437
YMR224C	MRE11	-0.435078	-0.331764	-0.298573	-3.08312	-1.53192	-1.76599			0	438
YOL090W	MSH2	0.763997	0.150391	-0.252269	-0.651997	-1.50623	-3.24596			0	439
YDR097C	MSH6	0.414299	0.00283577	0.0969379	-2.11714	-1.47503	-2.72053			0	440
YOR368W	RAD17	-0.635061	-0.529846	-0.59479	-2.66996	-2.1914	-3.34154			0	441
YLR288C	MEC3	-0.521603	-0.40468	-0.35713	-2.50477	-2.65729	-2.41348			0	442
YPL194W	DDC1	-0.0924328	-0.36333	-0.311946	-1.63168	-3.02852	-2.88817			0	443
YCR066W	RAD18	-0.801963	-0.187081	-0.554566	-2.59914	-1.54763	-1.41788			0	444
YLR376C	PSY3	-0.590633	-0.26996	-0.679272	-2.43823	-2.89777	-2.36049			0	445
YPL024W	RMI1	-0.600222	-0.675865	-0.480102	-2.76648	-2.5678	-2.09151			0	446
YER041W	YEN1	-0.757683	-0.151821	-0.424097	-3.02872	NA	-2.15829			0	447
YML021C	UNG1	-0.180696	0.0212331	-0.00656701	-2.08547	-1.428	-1.26324			0	448
YOR191W	ULS1	-0.532226	-0.209563	-0.609872	-1.94646	-1.22793	-2.31667			0	449
YDR092W	UBC13	-0.427158	-0.182143	-0.267041	-2.38565	-1.89282	-2.07054			0	450
YBR223C	TDP1	-0.560746	-0.45022	-0.504845	-2.64599	-2.84527	-2.04316			0	451
YNL309W	STB1	-0.707982	-0.119656	-0.499066	-2.14752	-1.46733	-2.08329			0	452
YJL092W	SRS2	-0.386102	-0.454327	-0.51204	-1.88353	-1.67656	-2.35857			0	453
YER116C	SLX8	-0.520895	-0.0535332	-0.318414	-1.87033	-0.649886	-1.16404			0	454
YLR135W	SLX4	-0.62324	-0.364491	-0.193928	-2.52168	-2.35451	-1.41282			0	455
YAL027W	SAW1	NA	NA	NA	NA	NA	NA			0	456
YGL175C	SAE2	-0.394178	-0.371537	-0.234304	-1.8988	-2.41366	-1.91024			0	457
YHR154W	RTT107	NA	NA	NA	NA	NA	NA			0	458
YHR031C	RRM3	-0.106144	-0.250614	-0.495827	-2.00849	-2.32328	-2.58113			0	459
YER070W	RNR1	NA	-0.092595	0.435391	NA	-2.20133	-0.155503			0	460
YBR073W	RDH54	-0.254736	-0.193273	-0.538621	-2.4054	-1.29267	-1.50144			0	461
YJR052W	RAD7	-0.732568	-0.277473	-1.03149	-2.96249	-1.91822	-3.28408			0	462
YDL059C	RAD59	-0.462793	-0.339474	-0.673265	-2.62783	-2.32079	-2.73288			0	463
YDR004W	RAD57	-0.425462	-0.420373	-0.0916138	-2.78424	-1.75453	-1.60379			0	464
YDR076W	RAD55	-0.410871	-0.330552	-0.436638	-2.19818	-2.16674	-1.94402			0	465
YGL163C	RAD54	-0.446744	-0.328387	-0.423847	-3.22432	-2.82607	-2.27656			0	466
YML032C	RAD52	-0.0439802	-0.447264	-0.310842	-2.34466	-1.64053	-1.4445			0	467
YLR032W	RAD5	-0.6123	-0.27386	-0.86885	-2.55876	-1.17659	-3.01338			0	468
YER162C	RAD4	0.0300114	0.0604149	0.0811263	-2.37975	-1.25916	-0.699386			0	469
YDR314C	RAD34	-0.42494	-0.350706	-0.489217	-2.72601	-3.10035	-3.3208			0	470
YGR258C	RAD2	-0.436507	0.0282451	-0.511655	-2.63116	-2.22885	-4.12581			0	471
YBR114W	RAD16	-0.264303	0.0757516	-0.117937	-3.02687	-1.85999	-2.26762			0	472
YMR201C	RAD14	-0.451103	-0.176024	0.181175	-2.76013	-1.57336	-1.25632			0	473
YMR137C	PSO2	-0.73795	-0.490104	-0.663579	-3.07179	-1.74126	-3.20296			0	474
YML061C	PIF1	-0.203236	-0.406924	-0.495252	-2.86313	-1.83784	-2.51462			0	475
YOR386W	PHR1	-0.363969	0.352217	0.479592	-2.42405	-0.663236	-0.12972			0	476
YOL043C	NTG2	-0.552364	0.307968	-0.327804	-1.84081	-1.57198	-1.59626			0	477
YAL015C	NTG1	-0.289709	0.145849	-0.381101	-1.17678	-1.49091	-2.36227			0	478
YLR265C	NEJ1	-0.527136	0.0290439	-0.354654	-2.52637	-1.61982	-1.26892			0	479
YGL087C	MMS2	-0.125937	-0.1607	0.0817845	-2.24669	-2.08374	-1.15969			0	480
YER142C	MAG1	-0.297177	0.21529	-0.232333	-2.47821	-1.47939	-2.02708			0	481
YDR499W	LCD1	-0.557405	-0.182595	-0.374589	-2.84131	-1.67569	-2.05726			0	482
YML058W-A	HUG1	-0.737118	-0.358641	-0.676839	-2.6325	-1.87981	-2.19992			0	483
YOR258W	HNT3	-0.195979	-0.401166	-0.421546	-1.84152	-2.07892	-2.39584			0	484
YOR033C	EXO1	-0.335514	-0.301696	-0.494164	-2.14548	-2.13966	-2.25073			0	485
YMR173W	DDR48	-0.555631	-0.4502	0.089788	-2.93971	-3.22739	-2.14735			0	486
YDL220C	CDC13	-0.232519	-0.241509	-0.443109	-1.68691	-0.785758	-1.65674			0	487
YBL019W	APN2	-0.654545	-0.296	-0.74499	-2.51752	-1.93143	-2.82713			0	488
YKL114C	APN1	0.00752049	0.994108	0.613397	-2.14842	-0.783861	-1.69667			0	489
YER095W	RAD51	-0.0445047	-0.170572	-0.871716	-2.41108	-1.22861	-2.06996			0	490
YEL037C	RAD23	0.578248	-0.0211195	0.055837	-1.47313	-2.63974	-3.41477			0	491
YER089C	PTC2	0.777466	-0.211317	-0.483222	-0.991313	-2.88278	-2.58814			0	492
YML011C	RAD33	-0.279912	-0.219157	-0.186392	-2.65676	-1.9668	-1.82975			0	493
YPL022W	RAD1	-0.146906	0.0160032	-0.361766	-1.86748	-1.87309	-3.87243			0	494
YDR291W	HRQ1	-0.240183	-0.147129	-0.376965	-1.9017	-1.38948	-2.14397			0	495
YDL126C	CDC48	0.241219	0.338768	2.29895	-1.01733	-0.970941	1.50862	AE	D	8	496
YHR064C	SSZ1	-0.47142	0.00989943	0.170242	-2.32433	-1.40849	-1.89886			0	497
YAL005C	SSA1	2.68326	2.90159	3.83372	0.206041	1.5686	2.36395	AE	D	8	498
YLL024C	SSA2	2.35631	1.07362	3.12501	-0.549276	-0.613843	2.06134	AE	D	8	499
YMR186W	HSC82	1.42372	2.58976	3.71771	-0.775959	0.807274	1.75171	AE	D	8	500
YPL240C	HSP82	0.985297	2.40922	3.22369	-1.26829	0.598558	1.13717	AE	D	8	501
YNL007C	SIS1	1.42794	2.04159	1.75859	-0.606123	0.402236	0.284261	AE	D	8	502
YLL026W	HSP104	1.54857	2.53769	2.02028	-0.114663	1.62296	0.219381	AE	D	8	503
YFL014W	HSP12	0.85481	2.27754	2.24259	-1.22302	-0.250077	0.737853	AE	D	8	504
YIL153W	RRD1	-0.196959	0.136664	-0.15913	-2.43345	-0.823674	-2.03777			0	505
YDR155C	CPR1	0.684169	1.89593	1.53381	-1.40565	0.0197729	-0.515963	AE	D	8	506
YNL123W	NMA111	0.480984	-0.374778	-0.207698	-2.12445	-2.39153	-1.55414	A		8	507
YJR017C	ESS1	0.380287	-0.35449	-0.360399	-1.86094	-2.77117	-3.27815	A		8	508
YJR032W	CPR7	0.288362	0.0351937	-0.165539	-1.68883	-1.77633	-2.82634	A		8	509
YNL135C	FPR1	0.126695	-0.0368158	-0.0198594	-1.73977	-1.8381	-1.76546	A		8	510
YLR216C	CPR6	0.614571	1.67259	1.60452	-1.45154	-0.274207	-0.0868234	AE	D	8	511
YML074C	FPR3	0.178461	1.02267	0.473558	-2.56181	-0.227327	-1.80978	A		8	512
YLR449W	FPR4	0.407695	0.132575	0.144355	-0.326954	-1.2613	-0.919847	A		8	513
YLR153C	ACS2	1.70382	-0.609073	1.25558	0.109029	-2.51162	0.612648	A	G	9	514
YAL054C	ACS1	0.502804	1.98477	1.6108	-1.43645	0.0732399	-0.274932	A	G	9	515
YJR109C	CPA2	0.408018	-0.311554	-0.189809	-2.37386	-2.26201	-1.4637	A		9	516
YOR303W	CPA1	0.898958	-0.4256	-0.59155	-1.06964	-1.99173	-1.59635	A		9	517
YGR192C	TDH3	3.55555	3.75646	3.80029	1.46943	2.06356	2.4945	A	G	9	518
YJR009C	TDH2	2.0829	0.656714	1.23923	-0.343109	-0.43935	0.0921759	A	G	9	519
YJL052W	TDH1	0.844162	1.75545	1.62533	-1.38097	0.4084	0.550416	A	G	9	520
YMR205C	PFK2	0.998518	0.359969	1.01202	-0.167927	-0.770636	-0.570957			0	521
YNR012W	URK1	0.0265975	-0.471949	-0.359273	-1.26188	-2.08182	-2.35014			0	522
YDR071C	PAA1	-0.0329711	-0.125251	-0.23168	-1.40331	-1.71251	-2.66233			0	523
YML060W	OGG1	-0.270032	-0.400807	-0.537329	-2.07458	-2.09779	-2.5703			0	524
YLR285W	NNT1	-0.531489	-0.456173	-0.202203	-2.06689	-2.37047	-1.36043			0	525
YDR296W	MHR1	-0.872821	-0.443779	-0.516054	-3.15101	-1.59004	-2.82236			0	526
YIL128W	MET18	-0.553384	-0.423827	-0.617428	-2.60405	-2.76608	-3.17802			0	527
YDR034C	LYS14	-0.517825	NA	-0.827226	-5.51809	NA	-2.87129			0	528
YDR098C	GRX3	-0.188772	-0.0369031	0.0929948	-2.47877	-2.09579	-2.78898			0	529
YML080W	DUS1	0.0249582	-0.139669	-0.0322278	-3.03552	-1.94341	-0.570368			0	530
YLR134W	PDC5	5.17437	4.34123	5.29138	3.4552	2.49556	3.12203	A	G	9	531
YKL060C	FBA1	4.42252	4.46781	4.41348	2.40223	1.85236	1.74336	A	G	9	532
YPL061W	ALD6	4.34422	3.85334	4.38528	2.65755	1.69281	1.33994	A	G	9	533
YAL038W	CDC19	3.58794	3.85511	4.1279	1.48028	1.47689	2.71715	A	G	9	534
YHR183W	GND1	3.19303	2.25281	3.72233	0.0154402	0.346156	2.49064	A	G	9	535
YDL055C	PSA1	3.33764	1.94137	0.947726	0.281399	0.709997	-4.1573	A	G	9	536
YLR109W	AHP1	1.96419	1.07472	1.72935	1.00075	-1.27168	-0.141185	A	G	9	537
YCR012W	PGK1	2.68881	3.50281	3.69335	0.136472	1.3134	1.57545	A	G	9	538
YEL046C	GLY1	2.70585	-0.30058	0.0972482	1.28909	-2.19578	-1.75491	A	G	9	539
YML028W	TSA1	2.64997	2.47334	3.20345	2.01283	0.561193	0.455902	A	G	9	540
YPR074C	TKL1	2.77209	1.57221	2.34753	-0.193317	0.483853	0.863355	A	G	9	541
YDL182W	LYS20	2.55715	0.999218	1.75514	0.754835	-0.72327	1.01263	A	G	9	542
YGL253W	HXK2	1.5324	0.996437	1.21579	-0.729406	-0.984139	-0.723851	A	G	9	543
YDR353W	TRR1	1.6638	0.247033	0.88697	-1.18302	-0.471436	0.0871812	A	G	9	544
YNR050C	LYS9	2.40229	0.629836	1.67319	0.479073	-1.05887	0.343615	A	G	9	545
YNL063W	MTQ1	1.75014	0.4111	0.695179	0.644968	-0.269718	-1.1275	A	G	9	546
YOR375C	GDH1	1.42711	0.172522	0.431516	-1.22796	-1.11847	-0.926525	A	G	9	547
YIL053W	RHR2	1.59935	0.927313	0.395538	-1.00893	-1.82484	-1.68102	A	G	9	548
YKL216W	URA1	2.00836	2.2883	1.64416	-0.502914	1.22716	-1.26952	A	G	9	549
YPL028W	ERG10	1.43478	1.73933	2.0787	-0.656513	-0.0057494	0.0256872	A	G	9	550
YIR034C	LYS1	2.50055	1.1098	0.84594	-0.0799816	-0.511148	-2.31889	A	G	9	551
YER091C	MET6	1.8126	0.997871	1.33504	-1.67982	-1.39558	0.278184	A	G	9	552
YLR180W	SAM1	1.66692	-0.516612	-0.048513	0.381273	-2.28741	-2.00432	A	G	9	553
YBR011C	IPP1	1.42516	0.58662	0.879599	-0.755605	-1.132	-2.21924	A	G	9	554
YLR354C	TAL1	1.84533	2.56337	2.59046	0.159984	0.822418	-1.30762	A		9	555
YML126C	ERG13	1.86946	0.454024	1.27553	0.42161	-1.34166	-0.393738	A		9	556
YJR104C	SOD1	1.25279	1.34574	1.08827	-0.645948	-0.859586	-0.435539	A		9	557
YGR254W	ENO1	1.20404	2.67283	2.33459	-0.396413	0.536162	0.2771	A		9	558
YBL024W	NCL1	1.35585	0.822326	0.694832	-1.81179	-0.913229	-1.98058	A		9	559
YLR058C	SHM2	2.26953	3.25108	4.03178	0.467998	0.984368	1.4493	A	G	9	560
YDR399W	HPT1	0.951798	0.364835	0.367109	-1.2909	-1.43062	-1.58104	A		9	561
YGL009C	LEU1	1.72056	0.013828	0.167906	-1.09823	-2.27127	-1.41502	A		9	562
YDR158W	HOM2	0.90839	0.209912	-0.196308	-0.797776	-1.27747	-0.653421	A		9	563
YAL012W	CYS3	0.843274	-0.0628481	0.528616	-2.05736	-1.8135	-1.21472	A		9	564
YGR061C	ADE6	1.00437	0.576065	-0.050605	-1.35227	-0.418305	-2.85531	A		9	565
YGR204W	ADE3	0.770752	0.947102	0.86743	-1.39467	-0.201597	-0.748274	A		9	566
YDL131W	LYS21	1.96744	1.00639	1.81474	-0.278736	-1.3941	0.387412	A		9	567
YGR124W	ASN2	0.824457	0.191908	0.241213	-0.534497	-0.545878	-1.40781	A		9	568
YDR502C	SAM2	0.502344	-0.852549	-0.494133	-0.930132	-2.83443	-2.21707	A		9	569
YKL035W	UGP1	1.3234	1.60357	2.27985	-0.553915	-0.0791775	0.871961	A		9	570
YOL058W	ARG1	0.221719	2.39565	1.96462	-1.79193	1.3799	0.17838	A	G	9	571
YJL130C	URA2	1.20855	0.771359	0.997623	-1.39146	-1.23136	-0.720997	A		9	572
YMR120C	ADE17	1.513	0.710691	1.10223	-0.756338	-0.625022	-0.639683	A		9	573
YMR318C	ADH6	0.330658	-0.258095	-0.133141	-2.32143	-3.02565	-2.09462	A		9	574
YMR228W	MTF1	0.402976	-0.140506	0.481874	-1.68403	-2.1493	-1.08316	A		9	575
YDR226W	ADK1	0.923143	0.457477	0.589422	-0.937939	-1.26765	-1.92495	A		9	576
YLR027C	AAT2	1.04959	0.512487	0.675127	-0.671158	-1.14587	-1.85178	A		9	577
YBR115C	LYS2	0.471918	0.907155	0.280653	-1.89006	0.0320457	-2.3634	A		9	578
YHR216W	IMD2	-0.110702	-0.319701	-0.506942	-1.96032	-1.86889	-2.1053	A		9	579
YGR234W	YHB1	0.768568	-0.224805	0.0976164	-1.53776	-1.97924	-2.82834	A		9	580
YNL220W	ADE12	0.104291	-0.440458	-0.0364285	-2.21833	-1.83729	-1.67921	A		9	581
YOR209C	NPT1	0.205214	-0.596041	-0.248536	-1.53385	-2.56462	-2.52809	A		9	582
YGR209C	TRX2	0.257402	0.550333	0.444277	-2.60437	-0.884197	-1.24334	A		9	583
YEL071W	DLD3	0.145451	-0.437562	0.247777	-2.10417	-1.46405	-0.117034	A		9	584
YKL067W	YNK1	0.243815	1.05928	0.930236	-2.25645	-0.439034	-2.32906	A		9	585
YCL040W	GLK1	-0.241724	0.707762	1.21241	-2.01076	-0.606662	-0.436415	A		9	586
YGL037C	PNC1	-0.385673	0.535497	0.419305	-2.92154	-1.2376	-0.727718	A		9	587
YHR167W	THP2	0.179759	-0.263433	0.465955	-0.47401	-1.85722	-1.13699			0	588
YML062C	MFT1	0.211845	-0.358772	-0.102633	-2.30481	-1.76714	-2.11318			0	589
YNL139C	THO2	0.527578	-0.0826683	-0.468106	-2.11546	-2.17727	-2.91286			0	590
YDR138W	HPR1	0.44532	-0.0685309	-0.0434231	-1.20476	-1.3746	-2.4577			0	591
YGL173C	XRN1	-0.600952	-0.252059	-0.321807	-2.80949	-3.27193	-2.46069			0	592
YGL130W	CEG1	NA	NA	NA	NA	NA	NA			0	593
YPL228W	CET1	0.776952	-0.310801	-0.163986	-0.726005	-1.96761	-2.02122			0	594
YER029C	SMB1	0.360531	0.0814887	0.126997	-1.60724	-1.5484	-2.91372			0	595
YIL061C	SNP1	0.127804	-0.163052	-0.486403	-2.52626	-1.84428	-3.2908			0	596
YLR116W	MSL5	0.677015	-0.192152	-0.499572	-1.78652	-1.49933	-2.08036			0	597
YGR013W	SNU71	0.105617	-0.0313486	-0.129639	-2.55898	-1.26294	-1.85872			0	598
YPR182W	SMX3	0.595701	0.0746485	0.205085	-1.31829	-1.42134	-1.5671			0	599
YLR275W	SMD2	0.00204699	-0.128674	0.203936	-2.00012	-1.96991	-1.21971			0	600
YDR240C	SNU56	0.120053	-0.143514	-0.580368	-2.12709	-1.74035	-3.63159			0	601
YBR119W	MUD1	0.395498	-0.267141	-0.566356	-2.23105	-2.50455	-2.25335			0	602
YFL017W-A	SMX2	0.245858	0.26843	0.410604	-2.05019	-2.17698	-1.91794			0	603
YGR074W	SMD1	0.281737	0.291173	0.534716	-1.64649	-0.586764	-1.43613			0	604
YKL074C	MUD2	0.404136	-0.0753202	-0.192847	-0.99149	-1.93609	-1.68102			0	605
YDR432W	NPL3	2.64575	1.68244	1.6283	0.140892	0.7877	-0.31579			0	606
YMR125W	STO1	2.59428	0.85259	0.554473	0.248475	-0.815737	-1.78285			0	607
YPL178W	CBC2	1.94742	1.19845	0.968251	-0.232023	-0.0667595	-0.461505			0	608
YDL160C	DHH1	-0.261415	0.501658	0.10383	-0.787932	-0.775013	-1.87374			0	609
YER035W	EDC2	0.044308	1.14741	0.602975	-0.958915	-0.78502	-0.89976			0	610
YNL118C	DCP2	-0.572007	-0.582706	-0.37537	-3.44474	-2.3693	-2.63333			0	611
YOL149W	DCP1	-0.527007	-0.338221	-0.117022	-2.81145	-2.56393	-2.74881			0	612
YOR001W	RRP6	-0.172732	-0.221957	-0.318714	-2.21963	-1.58408	-1.06235			0	613
YOL021C	DIS3	-0.141552	0.137901	0.4141	-2.24947	-0.900983	-2.16304			0	614
YDL111C	RRP42	-0.126186	-0.309107	0.0624936	-2.32644	-2.27995	-0.412472			0	615
YHR077C	NMD2	-0.413744	-0.421551	-0.465819	-1.53259	-1.64719	-1.8992			0	616
YMR080C	NAM7	-0.642867	-0.253086	-0.411472	-2.64629	-1.94929	-4.80479			0	617
YKL025C	PAN3	-1.03723	-0.34869	-0.577605	-2.80307	-2.65086	-2.25584			0	618
YGL094C	PAN2	-0.548468	-0.439429	-0.234985	-2.25645	-2.39913	-2.62513			0	619
YBL054W	TOD6	-0.509286	-0.516984	-0.397368	-2.93317	-1.95275	-1.93086			0	620
YHR085W	IPI1	0.348409	-0.521451	-0.601023	-0.224865	-2.52878	-3.01027			0	621
YHR197W	RIX1	0.330695	-0.277161	-0.555946	-2.39777	-1.81025	-1.87305			0	622
YGL213C	SKI8	-0.740928	-0.258091	-0.144937	-2.72166	-2.14964	-1.87799			0	623
YJL050W	MTR4	0.864242	0.475116	0.153067	-0.857732	-0.539897	-3.03173			0	624
YDL084W	SUB2	-0.633052	-0.385047	-0.66351	-1.84061	-1.85228	-2.19166			0	625
YPL029W	SUV3	0.036566	-0.449146	-0.29044	-0.609578	-1.66371	-1.92635			0	626
YNL138W	SRV2	-0.595225	-0.235586	-0.653012	-3.29718	-2.54804	-3.05454			0	627
YCR073W-A	SOL2	0.154616	-0.0375228	-0.573707	-2.72978	-2.25491	-3.04611			0	628
YJL080C	SCP160	-0.645006	-0.305638	-0.215755	-3.13235	-1.74259	-2.01333			0	629
YMR239C	RNT1	0.110326	-0.212439	-0.273204	-1.28942	-2.27775	-3.31635			0	630
YLR154C	RNH203	-0.457203	-0.405572	-0.465969	-2.541	-2.42969	-2.11412			0	631
YDR279W	RNH202	-0.341062	0.197917	-0.556883	-2.70233	-0.152164	-2.39733			0	632
YNL072W	RNH201	-0.172611	-0.549808	-0.584483	-2.59896	-3.05713	-1.86531			0	633
YGL014W	PUF4	-0.479388	-0.329749	-0.467173	-1.93772	-1.83673	-2.64265			0	634
YLL036C	PRP19	-0.549979	-0.259525	-0.108899	-2.61827	-2.5097	-2.16319			0	635
YCR077C	PAT1	-0.555251	-0.326081	-0.310892	-2.69671	-1.37174	-1.96572			0	636
YPL126W	NAN1	-0.446722	-0.222498	-0.0461637	-2.97357	-2.11904	-1.50008			0	637
YNL124W	NAF1	0.00433338	-0.308175	-0.48122	-2.40247	-2.40215	-2.12933			0	638
YPL184C	MRN1	-0.401456	-0.229477	-0.432045	-2.44869	-2.7477	-2.73618			0	639
YJL124C	LSM1	-0.394211	-0.00494854	-0.28812	-1.86069	-0.401957	-3.03901			0	640
YHR156C	LIN1	-0.779233	-0.397126	-0.583403	-2.43641	-1.83543	-2.49096			0	641
YBL032W	HEK2	-0.119521	-0.0956662	-0.0719779	-1.60704	-1.69217	-1.69095			0	642
YHR087W	RTC3	0.378533	0.77898	0.361384	-2.35542	-0.313737	-2.13621			0	643
YKL214C	YRA2	0.601196	0.561292	-0.15636	-1.53376	-1.20664	-1.57625			0	644
YMR229C	RRP5	0.9421	0.299221	0.207948	-1.46084	-1.68143	-2.49915			0	645
YOR243C	PUS7	0.932854	0.187342	0.148591	-2.19353	-1.35888	-1.73609			0	646
YHR089C	GAR1	0.881502	1.08575	2.28315	-1.85799	-0.307817	1.63673			0	647
YLR175W	CBF5	0.759861	1.60528	1.45398	-1.43077	0.0142309	0.276593			0	648
YOR051C	ETT1	0.88245	0.0464231	-0.0624626	-1.65321	-1.85222	-2.83218			0	649
YGR159C	NSR1	1.71729	1.68178	0.950397	-0.376792	-0.0913762	-0.92876			0	650
YGR218W	CRM1	0.218315	-0.0136748	0.280199	-1.80561	-0.795029	-2.95587			0	651
YNL178W	RPS3	-0.169394	-0.293386	-0.265633	-2.5982	-2.16322	-2.4006			0	652
YPR132W	RPS23B	0.629867	-0.134049	-0.0978952	-1.48084	-1.11358	-1.44167			0	653
YML073C	RPL6A	1.77903	-0.365057	0.900186	0.0919271	-1.74974	-1.46973			0	654
YGL135W	RPL1B	1.11679	3.04405	2.06614	-1.02021	0.746089	0.883106			0	655
YMR121C	RPL15B	0.175345	-0.50603	-0.374639	-0.941469	-2.24124	-1.55384			0	656
YGL048C	RPT6	-0.646603	-0.601562	-0.489328	-3.22463	-3.08382	-2.40641			0	657
YDR427W	RPN9	-0.974169	-0.270107	-0.997829	-2.98213	-2.58851	-3.15012			0	658
YBR272C	HSM3	-0.59345	-0.472671	-0.419737	-2.1291	-2.39875	-1.79129			0	659
YFL007W	BLM10	-0.525207	-0.0149641	-0.509323	-2.68963	-0.669875	-2.19916			0	660
YDR363W-A	SEM1	0.155661	-0.506896	-0.728404	-1.92257	-2.2856	-2.18699			0	661
YDL097C	RPN6	0.17726	-0.156612	-0.129537	-1.95016	-1.72021	-1.84394			0	662
YFR050C	PRE4	0.24374	-0.830661	0.0607952	-2.32624	-2.04844	-2.46257			0	663
YIL033C	BCY1	-0.330822	-0.375476	-0.612129	-1.7198	-1.77093	-2.30493			0	664
YJL164C	TPK1	0.769375	-0.0523836	-0.176643	0.169198	-2.18278	-1.8734			0	665
YBR160W	CDC28	0.241732	-0.270541	-0.27119	-1.26252	-1.17207	-2.15704			0	666
YKR038C	KAE1	0.137919	-0.311061	-0.398551	-1.47762	-2.18342	-2.10316			0	667
YJL184W	GON7	-0.0388071	-0.187297	-0.272966	-1.70987	-2.32243	-2.34805			0	668
YML121W	GTR1	-0.764073	-0.462817	-0.592398	-3.17047	-2.39446	-2.70378			0	669
YOR341W	RPA190	0.328306	1.40428	1.40264	-2.10115	1.15093	0.169047			0	670
YDR156W	RPA14	-0.667437	0.34983	0.140692	-2.19635	-0.104501	-2.16153			0	671
YJL011C	RPC17	0.0527714	-0.157656	0.173063	-2.53385	-1.05213	-1.42777			0	672
YDR361C	BCP1	0.100369	0.130689	-0.495137	-1.32144	-1.36596	-2.46525			0	673
YNL140C	YNL140C	0.46694	-0.0855738	-0.113499	-2.17454	-1.90719	-1.41078			0	674
YJR084W	YJR084W	-0.310096	0.298204	-0.0741901	-2.75434	-0.84961	-1.2734			0	675
YGR016W	YGR016W	-0.794234	-0.540695	-0.610456	-3.32886	-2.56009	-3.14282			0	676
YHR182W	YHR182W	-0.714365	-0.518812	-0.231895	-2.57856	-2.10933	-1.9591			0	677
YGR042W	MTE1	-0.434544	0.112852	-0.425083	-2.68139	-1.27573	-2.70876			0	678
YML109W	ZDS2	-0.582913	-0.290209	-0.673595	-2.5427	-1.79515	-2.98888			0	679
YMR273C	ZDS1	-0.338353	-0.513607	-0.585135	-1.72316	-2.46778	-2.52813			0	680
YIL063C	YRB2	0.505085	-0.0107608	-0.00925445	-0.420132	-1.81496	-1.47332			0	681
YDR520C	URC2	-0.391407	-0.366445	-0.251821	-3.14544	-2.67779	-1.70071			0	682
YDL091C	UBX3	-0.906911	-0.315813	-0.550362	-2.32808	-2.85341	-2.35609			0	683
YDL064W	UBC9	-0.202918	-0.118142	-0.436276	-1.63854	-1.60946	-2.35454			0	684
YMR022W	UBC7	-0.609251	-0.237765	-0.654014	-2.6444	-2.01512	-2.98327			0	685
YOL093W	TRM10	0.111898	-0.368804	-0.32383	-2.00683	-2.39126	-1.65252			0	686
YJR066W	TOR1	-0.32811	-0.47199	0.0911367	-1.8459	-1.65996	-0.320296			0	687
YDR172W	SUP35	-0.578585	-0.221354	-0.630284	-2.75509	-1.57409	-1.99792			0	688
YML034W	SRC1	-0.612676	-0.45635	-0.282628	-2.66211	-2.4662	-1.6127			0	689
YKL020C	SPT23	-0.812183	-0.710074	-0.218947	-3.00764	-2.05153	-2.78195			0	690
YDR510W	SMT3	-0.488198	-0.660573	-0.460507	-1.78491	-1.76217	-2.62109			0	691
YDL047W	SIT4	-0.24731	-0.508657	-0.423528	-1.965	-1.80607	-2.7708			0	692
YER120W	SCS2	-0.51054	-0.25978	-0.685286	-2.57862	-2.20063	-1.75514			0	693
YHR205W	SCH9	-0.51404	-0.0413483	-0.440869	-2.01006	-0.181532	-2.41116			0	694
YER129W	SAK1	-0.45907	-0.611721	-0.502459	-1.83898	-2.62401	-1.62491			0	695
YJL047C	RTT101	-0.754568	-0.409482	-0.678299	-2.54046	-3.0069	-2.24545			0	696
YOR014W	RTS1	-0.554006	-0.34661	-0.2548	-1.9748	-2.09889	-1.54602			0	697
YGL252C	RTG2	-0.324433	-0.00118433	-0.403341	-2.42867	-0.604991	-2.59123			0	698
YMR235C	RNA1	-0.722547	-0.583363	-0.688611	-3.27361	-2.72619	-1.75453			0	699
YMR247C	RKR1	-0.573279	-0.451436	-0.497179	-2.52358	-2.28573	-1.9824			0	700
YDR028C	REG1	-0.562045	-0.474924	-0.504029	-2.96028	-3.01119	-3.39763			0	701
YOL054W	PSH1	-0.364967	-0.160697	-0.385658	-1.9443	-2.14326	-2.47966			0	702
YDL188C	PPH22	-0.752956	-0.294992	-0.584183	-3.10593	-2.25965	-2.78248			0	703
YKL128C	PMU1	-0.0221655	-0.365172	-0.691766	-2.09661	-1.97912	-2.42045			0	704
YPL268W	PLC1	-0.305855	-0.186179	-0.571732	-1.54705	-1.10944	-2.08823			0	705
YLR151C	PCD1	-0.358154	-0.256637	-0.579624	-1.17732	-2.31196	-2.22581			0	706
YLR335W	NUP2	-0.50542	-0.434779	0.117427	-1.70461	-2.98429	-2.11479			0	707
YOR156C	NFI1	-0.44706	-0.32749	-0.649107	-1.25105	-2.35469	-2.133			0	708
YMR023C	MSS1	0.221766	0.30111	-0.00478772	-1.18435	-1.79157	-1.47411			0	709
YHR120W	MSH1	-0.619516	-0.65828	-0.789795	-1.868	-2.06782	-1.70585			0	710
YOR274W	MOD5	-0.320889	-0.0805952	-0.558948	-2.84074	-1.60997	-2.06			0	711
YKR095W	MLP1	-0.328895	-0.122128	-0.32774	-2.94698	-1.73248	-1.72282			0	712
YNL085W	MKT1	-0.494972	-0.497434	-0.727969	-1.76999	-2.33234	-2.49476			0	713
YOR330C	MIP1	-0.527422	-0.244486	-0.694595	-2.06106	-1.57667	-3.57551			0	714
YIR033W	MGA2	-0.624014	-0.300134	-0.312086	-2.50052	-2.25235	-2.25897			0	715
YIL046W	MET30	-0.725553	-0.205002	-0.506283	-2.56725	-2.44628	-2.63794			0	716
YJR024C	MDE1	0.0146783	-0.256687	-0.442779	-2.01562	-2.27249	-1.83464			0	717
YKL110C	KTI12	-0.0704862	-0.341873	-0.281058	-2.08729	-1.90518	-3.54401			0	718
YDL181W	INH1	-0.751643	-0.240004	-0.512611	-3.04203	-1.83428	-1.57758			0	719
YLR113W	HOG1	-0.350747	0.414825	-0.0690984	-2.32667	-0.174114	-2.93982			0	720
YGR163W	GTR2	-0.677836	-0.376549	-0.500103	-3.18727	-2.26963	-2.92181			0	721
YHR061C	GIC1	-0.545973	-0.698662	-0.417201	-2.95374	-2.15329	-2.40737			0	722
YMR307W	GAS1	-0.233328	-0.0726836	-0.370356	-1.7538	-1.79542	-1.43197			0	723
YOR271C	FSF1	-0.510615	-0.457414	-0.710079	-1.4518	-2.2689	-2.55181			0	724
YDR363W	ESC2	-0.281039	-0.102073	-0.529812	-3.02072	-1.302	-2.22672			0	725
YMR299C	DYN3	-0.566105	-0.0045553	-0.437327	-2.69424	-0.538267	-2.41157			0	726
YDL101C	DUN1	-0.0470545	-0.374744	-0.69323	-1.32266	-2.74559	-3.76476			0	727
YNL258C	DSL1	-0.691131	-0.366719	-0.483228	-2.40549	-2.31707	-2.40325			0	728
YDR069C	DOA4	-0.545325	-0.535687	-0.267528	-2.63296	-1.9677	-2.38467			0	729
YGL238W	CSE1	0.0323898	-0.0339866	-0.168458	-1.02423	-1.82602	-2.2858			0	730
YLR395C	COX8	0.333508	0.271138	-0.0247788	-2.43177	-1.39223	-1.56448			0	731
YLR117C	CLF1	-0.561333	-0.496994	-0.62025	-1.91059	-2.93989	-3.18914			0	732
YBR135W	CKS1	0.052908	-0.276503	-0.540972	-2.25101	-1.32273	-3.25798			0	733
YEL061C	CIN8	-0.464414	-0.437427	-0.524989	-3.08994	-1.51254	-3.40234			0	734
YBR274W	CHK1	-0.675893	-0.566035	-0.500652	-2.48554	-1.94111	-3.83597			0	735
YDL132W	CDC53	-0.19662	-0.237152	-0.649043	-3.67079	-1.23976	-1.73003			0	736
YDR182W	CDC1	-0.867723	-0.680403	-0.451587	-2.96973	-2.60437	-2.30792			0	737
YFL029C	CAK1	-0.66702	-0.151356	0.145764	-2.47444	-0.880331	-0.623386			0	738
YMR275C	BUL1	-0.106297	-0.549196	-0.399097	-1.35645	-2.5895	-2.34607			0	739
YLR319C	BUD6	-0.790463	-0.348142	-0.657537	-2.96025	-1.82194	-2.80127			0	740
YGL202W	ARO8	-0.182924	-0.160938	-0.420536	-1.40093	-0.616813	-2.47137			0	741
YMR072W	ABF2	-0.28292	-0.815803	-0.395263	-2.35003	-2.62558	-4.41973			0	742
YAL061W	BDH2	0.39425	3.38632	2.68298	-1.50488	0.113268	1.66338			0	743
YDR409W	SIZ1	-0.205466	0.375764	0.250865	-2.41584	-1.59368	-2.45404			0	744
YKL210W	UBA1	1.56347	0.435156	1.19068	-0.575253	-1.58494	-0.95073			0	745
YPL260W	YPL260W	0.357542	0.0186698	-0.171184	-0.624461	-1.58065	-2.3336			0	746
YLR358C	YLR358C	0.477598	-0.0838236	-0.230554	-0.972882	-0.957868	-2.36317			0	747
YBL028C	YBL028C	0.980162	-0.256318	-0.0894057	-0.234851	-1.71225	-1.42848			0	748
YDL201W	TRM8	0.334596	0.184268	-0.125077	-1.6264	-1.2185	-1.79752			0	749
YLR262C-A	TMA7	0.677288	-0.0556046	-0.343388	-1.45401	-1.55904	-3.5693			0	750
YBL058W	SHP1	0.186894	-0.0660252	0.0833835	-2.80268	-1.80156	-1.72113			0	751
YDR257C	RKM4	0.308378	0.0184548	0.016393	-0.546109	-0.480529	-1.48301			0	752
YMR311C	GLC8	-0.219582	0.10906	0.0542456	-2.28063	-1.62626	-2.0713			0	753
YLR436C	ECM30	0.360834	0.210265	-0.0933714	-1.94324	-1.16278	-2.46443			0	754
YAL059W	ECM1	0.375368	0.137562	0.00301526	-2.19657	-1.48342	-2.10134			0	755
