# Supplementary material for: Inhibition of transcription leads to rewiring of locus-specific chromatin proteomes
Source: Genome Res. 2020 Apr;30(4):635–46. doi: 10.1101/gr.256255.119 (PMC7197482; doi:10.1101/gr.256255.119)
Supplement: Supplemental Material [file supp_gr.256255.119_Supplemental_Table_S4.xlsx]

## Sheet: Sheet1
Supplemental Table S4
Yeast strains
Strain/library name	Genotype	Ref	Strains used in Figure:
			1	S1	2	S2	3	S3	4	S4	5	S5	Note
NKI8591	MATa his3Δ1 leu2Δ0 met15Δ0 ura3Δ0 ho::BC-KanMX-BC	This study	1	S1									expanded and rearrayed barcoder library
NKI8592	MATα can1Δ::HphMX lyp1Δ::STE3pr-LEU2 his3Δ1 leu2Δ0 ura3Δ0 met15Δ0 gene-TAP-His3MX6	This study	1	S1									rearrayed TAP library
NKI8598	MATα can1Δ::HphMX lyp1Δ::STE3pr-LEU2 his3Δ1 leu2Δ0 ura3Δ0 met15Δ0 ho::BC-KanMX-BC gene-TAP-His3MX6	This study	1	S1	2	S2	3		4	S4	5	S5	Epi-Decoder-HO I
NKI8599	MATα can1Δ::HphMX lyp1Δ::STE3pr-LEU2 his3Δ1 leu2Δ0 ura3Δ0 met15Δ0 ho::BC-KanMX-BC gene-TAP-His3MX6	This study	1	S1	2	S2	3		4	S4	5	S5	Epi-Decoder-HO II
NKI8600	MATα can1Δ::HphMX lyp1Δ::STE3pr-LEU2 his3Δ1 leu2Δ0 ura3Δ0 met15Δ0 ho::BC-KanMX-BC gene-TAP-His3MX6	This study	1	S1	2	S2	3		4	S4	5	S5	Epi-Decoder-HO III
NKI8528	MATα can1Δ::HphMX lyp1Δ::STE3pr-LEU2 his3Δ1 leu2Δ0 ura3Δ0 met15Δ0 ho::BC-KanMX-BC STE2-TAP-His3MX6	1				S2
NKI8529	MATα can1Δ::HphMX lyp1Δ::STE3pr-LEU2 his3Δ1 leu2Δ0 ura3Δ0 met15Δ0 ho::BC-KanMX-BC BAR1-TAP-His3MX6	1				S2
NKI8613	MATα can1Δ::HphMX lyp1Δ::STE3pr-LEU2 his3Δ1 leu2Δ0 ura3Δ0 met15Δ0 ho::BC-KanMX-BC POL2-TAP-His3MX6	This study				S2
NKI8587	MATα can1Δ::HphMX lyp1Δ::STE3pr-LEU2 his3Δ1 leu2Δ0 ura3Δ0 met15Δ0 ho::BC-KanMX-BC RPO21-TAP-His3MX6	1					3	S3		S4
NKI8619	MATα can1Δ::HphMX lyp1d::STE3pr-LEU2 his3Δ1 leu2Δ0 ura3Δ0 met15Δ0 ho::BC-KanMX-BC CTR9-TAP-His3MX6	This study			2				4	S4
NKI8625	MATα can1Δ::HphMX lyp1d::STE3pr-LEU2 his3Δ1 leu2Δ0 ura3Δ0 met15Δ0 ho::BC-KanMX-BC PAF1-TAP-His3MX6	This study							4	S4
NKI8628	MATα can1Δ::HphMX lyp1d::STE3pr-LEU2 his3Δ1 leu2Δ0 ura3Δ0 met15Δ0 ho::BC-KanMX-BC RPB3-TAP-His3MX6	This study								S4
NKI8647	MATα can1Δ::HphMX lyp1d::STE3pr-LEU2 his3Δ1 leu2Δ0 ura3Δ0 met15Δ0 ho::BC-KanMX-BC RPB2-TAP-His3MX6	This study								S4
NKI2609	MATα can1Δ::HphMX lyp1d::STE3pr-LEU2 his3Δ1 leu2Δ0 ura3Δ0 met15Δ0 ho::BC-KanMX-BC SRM1-TAP-His3MX6	This study					4			S4
NKI2608	MATα can1Δ::HphMX lyp1d::STE3pr-LEU2 his3Δ1 leu2Δ0 ura3Δ0 met15Δ0 ho::BC-KanMX-BC SSA2-TAP-His3MX6	This study								S4
NKI2611	MATα can1Δ::HphMX lyp1d::STE3pr-LEU2 his3Δ1 leu2Δ0 ura3Δ0 met15Δ0 ho::BC-KanMX-BC HMO1-TAP-His3MX6	This study								S4
NKI2612	MATα can1Δ::HphMX lyp1d::STE3pr-LEU2 his3Δ1 leu2Δ0 ura3Δ0 met15Δ0 ho::BC-KanMX-BC SPT2-TAP-His3MX6	This study								S4
A8545	h+ ade6-210 arg3-D4 his3-D1 leu1-32 ura4-D18 cnp1:cnp1-loxP-HA-HYG-loxP-T7 (S. Pombe)	Robin Allshire Lab			2	S2							spike-in strain
References 1	Korthout, T., et al. (2018). PLoS Biol. 16, e2005542.
