# Supplementary material for: Inhibition of transcription leads to rewiring of locus-specific chromatin proteomes
Source: Genome Res. 2020 Apr;30(4):635–46. doi: 10.1101/gr.256255.119 (PMC7197482; doi:10.1101/gr.256255.119)
Supplement: Supplemental Material [file supp_gr.256255.119_Supplemental_Table_S5.xlsx]

## Sheet: Sheet1
Supplemental Table S5
Primers
Primer Name	Sequence	Experiment	Description
HOpromQfw	GAAGCTTGTTGAAGCATGATGAA	ChIP-qPCR	BC_UP region
HOpromQrev	TTGCTGCTTATGAGGATATGGATTT	ChIP-qPCR	BC_UP region
HOtermQfw	GAGTAGAAATACGCCATCTCAAGATACA	ChIP-qPCR	BC_DN region
HOtermQrev	GGAAAGTTGATCAAGACCCAATAATAA	ChIP-qPCR	BC_DN region
YeastTef1_qfw1	CGGTCATGTCGATTCTGGTA	ChIP-qPCR	5'TEF1
YeastTef1_qRev1	ACCTAATTCAGCGGCTTCCT	ChIP-qPCR	5'TEF1
3'YeastTEF1_qFw1	GCTTTGGTCAAGTTCGTTCC	ChIP-qPCR	3'TEF1
3'YeastTEF1_qRev1	TAGCGGCCTTTTCAGTCTTG	ChIP-qPCR	3'TEF1
PMA1_ORF_Qfor1	AAATCTTGGGTGTTATGCCATGT	ChIP-qPCR	PMA1_ORF
PMA1_ORF_Qrev1	CCAAGTGTCTAGCTTCGCTAACAG	ChIP-qPCR	PMA1_ORF
ADH1 PRO ii fwd	CCGTTGTTGTCTCACCATATCC	ChIP-qPCR	ADH1_PRO
ADH1 PRO ii rev	GTTTCGTGTGCTTCGAGATACC	ChIP-qPCR	ADH1_PRO
NoORF_Qfor	GGCTGTCAGAATATGGGGCCGTAGTA	ChIP-qPCR	non-transcribed control region on chrom V
NoORF_Qrev	CACCCCGAAGCTGCTTTCACAATAC	ChIP-qPCR	non-transcribed control region on chrom V
2B_UP_Fw	AATGATACGGCGACCACCGAGATCTACACCTTCCGATCTAGATGTCCACGAGGTCTCT	Barcode-library-seq	BC_UP Library PCR
2B_DN_Fw	AATGATACGGCGACCACCGAGATCTACACTCTTCCGATCTACGGTGTCGGTCTCGTAG	Barcode-library-seq	BC_DN Library PCR
2B_UP_Rv_all	CAAGCAGAAGACGGCATACGAGATNNNNNNGTCGACCTGCAGCGTACG	Barcode-library-seq	BC_UP Library PCR
2B_DN_Rv_all	CAAGCAGAAGACGGCATACGAGATNNNNNNAACGAGCTCGAATTCATCGA	Barcode-library-seq	BC_DN Library PCR
2B_UP_Seq	ACACCTTCCGATCTAGATGTCCACGAGGTCTCT	Barcode-library-seq	BC_UP Seq primer
2B_DN_Seq	ACACTCTTCCGATCTACGGTGTCGGTCTCGTAG	Barcode-library-seq	BC_DN Seq primer
KanMX_Qfw	TGATGCGCTGGCAGTGTT	qRT-PCR	KanMX
KanMX_Qrev	CGCGATCGCTGTTAAAAGGA	qRT-PCR	KanMX
ZRT1_qFW	GCCATCGGTTTGGGTGTTC	qRT-PCR	ZRT1
ZRT1_qRev1	CCAGAGATAACAAGCGCAGTGT	qRT-PCR	ZRT1
not3_qFwd	AAAGGTCTCGTGATATGTGTGAAA	qRT-PCR	NOT3
not3_qRev	CCAAGGGAGATGGTGGATTA	qRT-PCR	NOT3
IMD2_2f	TTGGATTCATCCCAAGGAAA	qRT-PCR	IMD2
IMD2_2r	AGCAATCAAATTGGCAGCTT	qRT-PCR	IMD2
RPS31-1	GATTGATCTTTGCTGGTAAGC	qRT-PCR	RPS31
RPS31-rev	CCAAGTGTAGAGTAGATTCC	qRT-PCR	RPS31
Pom_qact1 fw	CCCAAATCCAACCGTGAGAAGATG	qRT-PCR	S. pombe ACT1
Pom_qact1 rev	CCAGAGTCCAAGACGATACCAGTG	qRT-PCR	S. pombe ACT1
