# Supplementary material for: Inhibition of transcription leads to rewiring of locus-specific chromatin proteomes
Source: Genome Res. 2020 Apr;30(4):635–46. doi: 10.1101/gr.256255.119 (PMC7197482; doi:10.1101/gr.256255.119)
Supplement: Supplemental Material [file supp_gr.256255.119_Supplemental_Table_S6.xlsx]

## Sheet: Readme
Epi-Decoder-HO_171107_4666
Barcode Reference Table
Raw sequencing data has been submitted to the NCBI BioProject database (https://www.ncbi.nlm.nih.gov/bioproject/) under accession number PRJNA610036, and to the the NCBI BioSample database (https://www.ncbi.nlm.nih.gov/biosample/) under accession number SAMN14271070

## Sheet: EpiDecoder2.0-HO
ORF	Name	EDec_plate1536	pool	BC_UP	BC_DN	BC_UP reseq	BC_DN_reseq	Pool Label
YGR163W	GTR2	1	D1.1	ATGTAACACGCCCGGAATGC	TGAAGTAGACTCTCCCAATC	ATGTAACACGCCCGGAATGC	TGAAGTAGACTCTCCCAATC	V1A
YJL011C	RPC17	1	D1.1	GACTAGGACCGATTGCACTT	GTGAGAGTTGCATTCTTCCT	GACTAGGACCGATTGCACTT	GTGAGAGTTGCATTCTTCCT	V1A
YLR052W	IES3	1	D1.1	AGCACTATGCGAAGTAAGCC	CTGAGAGTTCGATGACCTGT	AGCACTATGCGAAGTAAGCC	CTGAGAGTTCGATGACCTGT	V1A
YDR409W	SIZ1	1	D1.1	TTGAGGAGCCCGTACTCTGC	TGGGATAGACCCTAACCACC	TTGAGGAGCCCGTACTCTGC	TGGGATAGACCCTAACCACC	V1A
YHR143W-A	RPC10	1	D1.1	GGCCAACGTAAATCAGCTCA	CATGGATTGAAAGGTGCTCA	GGCCAACGTAAATCAGCTCA	CATGGATTGAAAGGTGCTCA	V1A
YDR440W	DOT1	1	D1.1	ACGCTCGTATCACTGGTTAT	ATCGTACTTGGCACTGGAGT	ACGCTCGTATCACTGGTTAT	ATCGTACTTGGCACTGGAGT	V1A
YKL160W	ELF1	1	D1.1	CACTATTCTCTAGGAGGGTG	TATAGCCACTCACTTGTGTG	CACTATTCTCTAGGAGGGTG	TATAGCCACTCACTTGTGTG	V1A
YIL063C	YRB2	1	D1.1	ATGGAACCGTTAATCCTGCG	ATCCACTGACGAGAGAGTCG	ATGGAACCGTTAATCCTGCG	ATCCACTGACGAGAGAGTCG	V1A
YNL068C	FKH2	1	D1.1	GCGGCGGATATGCTATAAAT	GCTCGACTATGCCTTCAGGT	GCGGCGGATATGCTATAAAT	GCTCGACTATGCCTTCAGGT	V1A
YDR005C	MAF1	1	D1.1	AGTTTATACCCACTCTGGTC	CCTAAGGTTTGCGAAAGTTC	AGTTTATACCCACTCTGGTC	CCTAAGGTTTGCGAAAGTTC	V1A
YJL184W	GON7	1	D1.1	TAACTGGACCTAAGTGAGAG	AGACGACTAGCACGCCATAG	TAACTGGACCTAAGTGAGAG	AGACGACTAGCACGCCATAG	V1A
YHR183W	GND1	1	D1.1	CCCAGGAGTAAATCGCTAGA	CCGAATCGAGAACAGGCTTA	CCCAGGAGTAAATCGCTAGA	CCGAATCGAGAACAGGCTTA	V1A
YEL009C	GCN4	1	D1.1	GAAGGCTGACGAAGTTTACC	TATAACGGAGCCGAAGGACT	GAAGGCTGACGAAGTTTACC	TATAACGGAGCCGAAGGACT	V1A
YNL059C	ARP5	1	D1.1	GCTCGGCATAAATCTCAACA	TGTCCAGCAGCACCGGATAT	GCTCGGCATAAATCTCAACA	TGTCCAGCAGCACCGGATAT	V1A
YBR231C	SWC5	1	D1.1	CATTCAGTGAGCCAGATAGG	TATGATAGCCACCGCGTCGC	CATTCAGTGAGCCAGATAGG	TATGATAGCCACCGCGTCGC	V1A
YDL197C	ASF2	1	D1.1	GCTACACTGAGCATAGAGCG	ACTTAGGGAGTATCAGCATT	GCTACACTGAGCATAGAGCG	ACTTAGGGAGTATCAGCATT	V1A
YDR432W	NPL3	1	D1.1	ATACTTGTACCAGGGCCAGG	AAAGTCGGGTGCATCCTTCT	ATACTTGTACCAGGGCCAGG	AAAGTCGGGTGCATCCTTCT	V1A
YLR262C-A	TMA7	1	D1.1	CAGACAGGTTAATAAGTGCC	CAAACTGAGTGGACAGACTG	CAGACAGGTTAATAAGTGCC	CAAACTGAGTGGACAGACTG	V1A
YAL027W	SAW1	1	D1.1	AGTAGCAACCCACGTTCATA	AGTACGCAAACAGATTCGCC	NA	NA	V1A
YGL238W	CSE1	1	D1.1	GGATGTTTCCTCAGCTCCGT	TAGCGTAACACAGTTGGGAC	GGATGTTTCCTCAGCTCCGT	TAGCGTAACACAGTTGGGAC	V1A
YER162C	RAD4	1	D1.1	AGATCGTCAGGTCCACCGTT	CGCACCTATATTAAACCGGA	AGATCGTCAGGTCCACCGTT	CGCACCTATATTAAACCGGA	V1A
YKL139W	CTK1	1	D1.1	ATAGTGACGGAACTGTTAGC	AGGACATCTATAACTCCGTC	ATAGTGACGGAACTGTTAGC	AGGACATCTATAACTCCGTC	V1A
YER063W	THO1	1	D1.1	TATGACTTCCCATTCGGTCG	TAGTAGGTCGCAGGTCTCCT	TATGACTTCCCATTCGGTCG	TAGTAGGTCGCAGGTCTCCT	V1A
YJL047C	RTT101	1	D1.1	GCCTGACAGACAATCTATCA	CACGCGGATCTATGATTAGT	GCCTGACAGACAATCTATCA	CACGCGGATCTATGATTAGT	V1A
YJL081C	ARP4	1	D1.1	TTATGACGACCAGCGATGGC	TATGATCTCTGCCAACTTGC	TTATGACGACCAGCGATGGC	TATGATCTCTGCCAACTTGC	V1A
YGL207W	SPT16	1	D1.1	TACCGGATTACAGCTCGTGG	TCCTTTGAGGTAGAGCTAGT	TACCGGATTACAGCTCGTGG	TCCTTTGAGGTAGAGCTAGT	V1A
YPR086W	SUA7	1	D1.1	AATCCGCGTCCAAGTGGCTA	AATCCTGGTCAACTTGTGCC	AATCCGCGTCCAAGTGGCTA	AATCCTGGTCAACTTGTGCC	V1A
YIL128W	MET18	1	D1.1	CGCATGACGCAATATGGATA	TGAGTCCTACGCACGCTATG	CGCATGACGCAATATGGATA	TGAGTCCTACGCACGCTATG	V1A
YMR037C	MSN2	1	D1.1	ATAATCAGCGGGAATCAGGC	AAGCCGATGGCATGTCAGAT	ATAATCAGCGGGAATCAGGC	AAGCCGATGGCATGTCAGAT	V1A
YNL201C	PSY2	1	D1.1	ATATCTCGTAACGCGGCAGC	ACTACAGTGCGCGTAATGCG	ATATGACCGCCCATGCGTAG	CACTAGCTGCAATGAGGTTA	V1A
YOR060C	SLD7	1	D1.1	TACATCACCGTATGTGGCAG	TTAGCACCTGTCACATCGGG	TACATCACCGTATGTGGCAG	TTAGCACCTGTCACATCGGG	V1A
YLR109W	AHP1	1	D1.1	GTGACCACTACAGTTTATGC	GGTTGAACAGCCCTCGAATC	GTGACCACTACAGTTTATGC	GGTTGAACAGCCCTCGAATC	V1A
YJL065C	DLS1	1	D1.1	TACTGCGAGATACGTGTCTG	TAGCACTTCACATACGAGTC	TACTGCGAGATACGTGTCTG	TAGCACTTCACATACGAGTC	V1A
YNL082W	PMS1	1	D1.1	GAGTATCTTATCCACCTCTA	GGATGATCTTACCTCACTCT	GAGTATCTTATCCACCTCTA	GGATGATCTTACCTCACTCT	V1A
YPL268W	PLC1	1	D1.1	ACTCTGAGCGGATACCGGAT	AGGGAGGTCTCTCACCATCT	ACTCTGAGCGGATACCGGAT	AGGGAGGTCTCTCACCATCT	V1A
YAL015C	NTG1	1	D1.1	CACGTAATACTAAGTGAGGC	CACAGTAGGTAAGCTGTACG	CACGTAATACTAAGTGAGGC	CACAGTAGGTAAGCTGTACG	V1A
YGL252C	RTG2	1	D1.1	ACACCTGAGTAGGCGCGATT	CCGGCTGCTAAATACTAACA	ACACCTGAGTAGGCGCGATT	CCGGCTGCTAAATACTAACA	V1A
YGL009C	LEU1	1	D1.1	CGCGTACACTTACTATCAAG	CAGGTCAGTACACTTATTGG	CGCGTACACTTACTATCAAG	CAGGTCAGTACACTTATTGG	V1A
YBR272C	HSM3	1	D1.1	CCAGCTACTAAAGGATGTCA	AAGCCTTCAGTGCGTCATGT	CCAGCTACTAAAGGATGTCA	AAGCCTTCAGTGCGTCATGT	V1A
YGL044C	RNA15	1	D1.1	CATGATCGAGAATGACTCAC	TATGTTGCCGCATCTCCGAT	CATGATCGAGAATGACTCAC	TATGTTGCCGCATCTCCGAT	V1A
YNL139C	THO2	1	D1.1	ATGGCATGACGACCTTCGCT	TCACTTCCATCAGGGTGTGG	ATGGCATGACGACCTTCGCT	TCACTTCCATCAGGGTGTGG	V1A
YJR093C	FIP1	1	D1.1	CACGTCACCGTATGTAGAGT	CACCAGCCGTGACTGTGTTT	CACGTCACCGTATGTAGAGT	CACCAGCCGTGACTGTGTTT	V1A
YMR120C	ADE17	1	D1.1	TATCATCTGGGACAGCGTTG	CTCTAGTATGCAGGATGTTG	TATCATCTGGGACAGCGTTG	CTCTAGTATGCAGGATGTTG	V1A
YOR274W	MOD5	1	D1.1	GGGCACACCCAATTTAGACA	GCGCGTCAAGTACAAAGTTA	GGGCACACCCAATTTAGACA	GCGCGTCAAGTACAAAGTTA	V1A
YPL008W	CHL1	1	D1.1	CATCTCCGGTAAGGGATTAG	CACGTTTCATGGTAGAGGTT	CATCTCCGGTAAGGGATTAG	CACGTTTCATGGTAGAGGTT	V1A
YIR033W	MGA2	1	D1.1	TAAACACAGTGCTCAAGCGC	CGCGACATCATAGCAACTTA	TAAACACAGTGCTCAAGCGC	CGCGACATCATAGCAACTTA	V1A
YDR301W	CFT1	1	D1.1	CTCATCAGCTCATAGGAGGG	ACATCGACTAGAGCTTATGG	CTCATCAGCTCATAGGAGGG	ACATCGACTAGAGCTTATGG	V1A
YBR278W	DPB3	1	D1.1	TAGACTTATGTCACACGCGG	TAACATCATCGCATGGCGGG	TAGACTTATGTCACACGCGG	TAACATCATCGCATGGCGGG	V1A
YGL070C	RPB9	1	D1.1	GTAATACACTTCAAGGACCC	TAAGGGTTACGAACATCGCC	GTAATACACTTCAAGGACCC	TAAGGGTTACGAACATCGCC	V1A
YGL253W	HXK2	1	D1.1	GCGCCTCTGCAAGAAGAACA	TAGAGCGTCGCATCGGATAT	GCGCCTCTGCAAGAAGAACA	TAGAGCGTCGCATCGGATAT	V1A
YIL033C	BCY1	1	D1.1	GCTCGCTAGATTGAGAGAAT	ATACACCGGCATAATCTGTC	GCTCGCTAGATTGAGAGAAT	ATACACCGGCATAATCTGTC	V1A
YMR311C	GLC8	1	D1.1	ATCGAGCACGTAACCGTTGC	AATCAGCCGTAACGTGAGAG	ACCACTCACTAAGGAGGATC	ACCATATCGTTGAAGTGGAG	V1A
YCR033W	SNT1	1	D1.1	AGAGTGCCGCAACCTCAGTA	GCGGCACTTAAACACTATCA	AGAGTGCCGCAACCTCAGTA	GCGGCACTTAAACACTATCA	V1A
YDR485C	VPS72	1	D1.1	GAGACTAAGTTCGGAAATCC	GACCCTTATCCAGTCTTGTG	GAGACTAAGTTCGGAAATCC	GACCCTTATCCAGTCTTGTG	V1A
YMR227C	TAF7	1	D1.1	TATGATCCTCTCGACAGGCG	AATACTCCTAATGCTGGCGA	TATGATCCTCTCGACAGGCG	AATACTCCTAATGCTGGCGA	V1A
YGL112C	TAF6	1	D1.1	TCAGCTTTCACAAGGGCCGA	TAATCACGTCGAACCTGAGC	TCAGCTTTCACAAGGGCCGA	TAATCACGTCGAACCTGAGC	V1A
YGR104C	SRB5	1	D1.1	GGACCCGATACACGATGTTC	GGAGCTACGGGCACTCTTAT	GGACCCGATACACGATGTTC	GGAGCTACGGGCACTCTTAT	V1A
YLR180W	SAM1	1	D1.1	AACGAGTTGTGACACTTGGT	CCGTCTCGGAAACTAGATAA	AACGAGTTGTGACACTTGGT	CCGTCTCGGAAACTAGATAA	V1A
YLR335W	NUP2	1	D1.1	AGATGACACAACCCGGTGCA	AATGTGAGCGAAGTCCACCC	AGATGACACAACCCGGTGCA	AATGTGAGCGAAGTCCACCC	V1A
YER111C	SWI4	1	D1.1	AGACCGTACACATTTATGGC	AGACACCCTATGAATCTTGC	AGACCGTACACATTTATGGC	AGACACCCTATGAATCTTGC	V1A
YPR120C	CLB5	1	D1.1	GCACCCATCTTCATAAGTAG	TATCAGCATCGACGGACACG	GCACCCATCTTCATAAGTAG	TATCAGCATCGACGGACACG	V1A
YGL131C	SNT2	1	D1.1	GATCGTTACCCACTTGCATG	GCCTATTGCATATACGACCT	GATCGTTACCCACTTGCATG	GCCTATTGCATATACGACCT	V1A
YOR304W	ISW2	1	D1.1	TTCGACAGCGGGATACATCG	TACAAACCAAGAGTGTGTCG	TTCGACAGCGGGATACATCG	TACAAACCAAGAGTGTGTCG	V1A
YLR358C	#REF!	1	D1.1	GATAGATTCCCAGCTTTCGC	GCGACGATAGTAGTACATAG	GATAGATTCCCAGCTTTCGC	GCGACGATAGTAGTACATAG	V1A
YDR318W	MCM21	1	D1.1	TTAGTCACGCCACTGGCTCG	TGGAGTGTATCACCCGTCCT	TTAGTCACGCCACTGGCTCG	TGGAGTGTATCACCCGTCCT	V1A
YPR132W	RPS23B	1	D1.1	ATAGATACCGCAGCTCACAG	GCGTCAACTAAATTCCAGCA	ATAGATACCGCAGCTCACAG	GCGTCAACTAAATTCCAGCA	V1A
YGL060W	YBP2	1	D1.1	AATTCGCACGCAGGTTGACG	AATTGTATAGCAGTCGTCGG	AATTCGCACGCAGGTTGACG	AATTGTATAGCAGTCGTCGG	V1A
YDR226W	ADK1	1	D1.1	CGAGCTTACCAACTACTTGA	CAATCGCAGGTCAGATGATG	CGAGCTTACCAACTACTTGA	CAATCGCAGGTCAGATGATG	V1A
YML102W	CAC2	1	D1.1	GCATCTCAGAAATCGGCACA	CGAGTGACTAGATACGCTAT	GCATCTCAGAAATCGGCACA	CGAGTGACTAGATACGCTAT	V1A
YDR071C	PAA1	1	D1.1	GCAAGTGCTGGCAATCTAGC	AGTATAAACCTACCTAAGGC	GCAAGTGCTGGCAATCTAGC	AGTATAAACCTACCTAAGGC	V1A
YDR363W	ESC2	1	D1.1	TTAGCGGCGAGACCTCCTAT	TTGTGTACCCGACCCGCTGT	TTAGCGGCGAGACCTCCTAT	TTGTGTACCCGACCCGCTGT	V1A
YKL035W	UGP1	1	D1.1	TGATCGCTAACAGCTCAGGC	GCTCCTAGAGTATGAGAGAT	TGATCGCTAACAGCTCAGGC	GCTCCTAGAGTATGAGAGAT	V1A
YPR018W	RLF2	1	D1.1	AACAGACTTTGTAACAGGCG	ATGATTGACCCGCAGACTCC	AACAGACTTTGTAACAGGCG	ATGATTGACCCGCAGACTCC	V1A
YCR066W	RAD18	1	D1.1	CGATCCACAGTAGCTGAATC	GGAGATGACACAATCGCCCA	CGATCCACAGTAGCTGAATC	GGAGATGACACAATCGCCCA	V1A
YDR303C	RSC3	1	D1.1	CGCCCAATGCAATTTGTAGA	GGCACGTTGTCTAACTACGG	CGCCCAATGCAATTTGTAGA	GGCACGTTGTCTAACTACGG	V1A
YMR044W	IOC4	1	D1.1	GCGCAAATAAAGATGTCGTG	GATGCGCCCTCAGTTTGTCT	GCGCAAATAAAGATGTCGTG	GATGCGCCCTCAGTTTGTCT	V1A
YER159C	BUR6	1	D1.1	AATCGGACCTGATATGGCGC	ATAGCCGTCGGATCTGTGTT	AATCGGACCTGATATGGCGC	ATAGCCGTCGGATCTGTGTT	V1A
YOR038C	HIR2	1	D1.1	GAGATCATGCTATTCAAGCC	AGGCGATGATGGCATTTACT	GAGATCATGCTATTCAAGCC	AGGCGATGATGGCATTTACT	V1A
YDR448W	ADA2	1	D1.1	TTATCCGGTAGCCATAGGCG	TTAGGTCTCAGCACTACTCG	TTATCCGGTAGCCATAGGCG	TTAGGTCTCAGCACTACTCG	V1A
YDR308C	SRB7	1	D1.1	CCATATTTGCGAAGGTCGGC	CATGACAGTGCTTAGAACCG	CCATATTTGCGAAGGTCGGC	CATGACAGTGCTTAGAACCG	V1A
YIL101C	XBP1	1	D1.1	AGCAGACTCGAATGTTGCGC	CAAGCCGCTGTCAGATGTGT	AGCAGACTCGAATGTTGCGC	CAAGCCGCTGTCAGATGTGT	V1A
YCL011C	GBP2	1	D1.1	TTATAGCGAGCACACTGCGC	ATCTGAGGCATAGCCAGTCG	TTATAGCGAGCACACTGCGC	ATCTGAGGCATAGCCAGTCG	V1A
YJL115W	ASF1	1	D1.1	TCAAGCGAATCCCATGTGAC	CCGGACATAGCATATTAACC	TCAAGCGAATCCCATGTGAC	CCGGACATAGCATATTAACC	V1A
YBR202W	MCM7	1	D1.1	GCACGCTGACTATACTTCAA	GATATAACACATCGCGTCCA	GCACGCTGACTATACTTCAA	GATATAACACATCGCGTCCA	V1A
YGR254W	ENO1	1	D1.1	GAGATGTGGATCTCACCCAT	GAGCGAGGTCTATATCTTGT	GAGATGTGGATCTCACCCAT	GAGCGAGGTCTATATCTTGT	V1A
YHR061C	GIC1	1	D1.1	AGTATCTCACTACGGCTCAT	TACCTGTTCAGCAGTTGTGG	AGTATCTCACTACGGCTCAT	TACCTGTTCAGCAGTTGTGG	V1A
YJL164C	TPK1	1	D1.1	CCTGTAGATTGACGTGTAGT	GCCCTCGTGACAAATCGAAA	CCTGTAGATTGACGTGTAGT	GCCCTCGTGACAAATCGAAA	V1A
YJR032W	CPR7	1	D1.1	CCTGCGAAGGAATTGGAATA	CAGATACGGGAACACTGTAC	CCTGCGAAGGAATTGGAATA	CAGATACGGGAACACTGTAC	V1A
YJL130C	URA2	1	D1.1	AGCCATGATTTCACATTCGG	CTTATTCATAGAGGCTTGGG	AGCCATGATTTCACATTCGG	CTTATTCATAGAGGCTTGGG	V1A
YDR092W	UBC13	1	D1.1	GCCCAAGTACAATTTCGACA	GCCCAGTGTCAATTTCGTTA	GCCCAAGTACAATTTCGACA	GCCCAGTGTCAATTTCGTTA	V1A
YOL068C	HST1	1	D1.1	CCATAGGTTTAACGCTTGCG	CATGACGGGTGACGTTCTTT	CCATAGGTTTAACGCTTGCG	CATGACGGGTGACGTTCTTT	V1A
YFR028C	CDC14	1	D1.1	ATGAGCATCCTGGTAACCCG	AACCTTACGGCAGAGTAGCA	ATGAGCATCCTGGTAACCCG	AACCTTACGGCAGAGTAGCA	V1A
YDR361C	BCP1	1	D1.1	TACCAGTACATTGCCTGAAG	GTTCAACCCATCGGATATAG	TACCAGTACATTGCCTGAAG	GTTCAACCCATCGGATATAG	V1A
YDR138W	HPR1	1	D1.1	AATCTGCATGAAGGTTGAGC	CCCGTGCATCAATAGTAGTA	AATCTGCATGAAGGTTGAGC	CCCGTGCATCAATAGTAGTA	V1A
YMR033W	ARP9	1	D1.1	GACCACCGATAAGGCTAATC	GAACCGACTTGACTACATTG	GACCACCGATAAGGCTAATC	GAACCGACTTGACTACATTG	V1A
YBL052C	SAS3	1	D1.1	CGCCTAAGACCGGATAAAGA	CACTTATTAGGAGGCAGATG	NA	NA	V1A
YJR006W	POL31	1	D1.1	TGCCTAAGACCGGATAAAGA	CACTTATTAGGAGGCAGATG	NA	NA	V1A
YLR015W	BRE2	1	D1.1	GGGATCTTCACAACTTCTCA	TTGCCATGCACAACGAGACA	GGGATCTTCACAACTTCTCA	TTGCCATGCACAACGAGACA	V1A
YJL127C	SPT10	1	D1.1	TGGGACTCAACCAACATCGA	TATGGAACTCACCGCGTAGC	TGGGACTCAACCAACATCGA	TATGGAACTCACCGCGTAGC	V1A
YDR146C	SWI5	1	D1.1	GCGCGTATAGTGCCTTAATT	TACGCAAATCAAGGCTAGCC	GCGCGTATAGTGCCTTAATT	TACGCAAATCAAGGCTAGCC	V1A
YKL210W	UBA1	1	D1.1	GGCTTATAGAGACATACACC	GCAAGAAATACAGCGGGCTC	GGCTTATAGAGACATACACC	GCAAGAAATACAGCGGGCTC	V1A
YOR033C	EXO1	1	D1.1	ATTATACCGCCGGAATGGGC	GCCGAATACGTGCTAATTGC	ATTATACCGCCGGAATGGGC	GCCGAATACGTGCTAATTGC	V1A
YAR002W	NUP60	1	D1.1	TGTGGAACCAAAGCGCCCAA	TGATCCGGTCTAATCCGACG	TGTGGAACCAAAGCGCCCAA	TGATCCGGTCTAATCCGACG	V1A
YER038C	KRE29	1	D1.1	GGTATGACTATCACCCATCG	GAAATCCACTGTCACATTCG	GGTATGACTATCACCCATCG	GAAATCCACTGTCACATTCG	V1A
YIL021W	RPB3	1	D1.1	ACACGACCAGGGATGGAATC	AGATCACTGTAACCGCCGAG	ACACGACCAGGGATGGAATC	AGATCACTGTAACCGCCGAG	V1A
YCR084C	TUP1	1	D1.1	GCTACCAGACCATTTGAGGC	GACGCGCTCGTAACTCATAG	GCTACCAGACCATTTGAGGC	GACGCGCTCGTAACTCATAG	V1A
YML065W	ORC1	1	D1.1	CAGATCAGAGAAGGTGCCAC	ATATGCGGCCCATGCCTATG	CAGATCAGAGAAGGTGCCAC	ATATGCGGCCCATGCCTATG	V1A
YOR213C	SAS5	1	D1.1	CCAGTCACAAGATAGTGCCA	TATGACGCCATCAGCACGAA	CCAGTCACAAGATAGTGCCA	TATGACGCCATCAGCACGAA	V1A
YPR065W	ROX1	1	D1.1	CTTGAATCGCAAGGAAGCTA	CAGAAGTGAGAATTGCGCTA	CTTGAATCGCAAGGAAGCTA	CAGAAGTGAGAATTGCGCTA	V1A
YMR127C	SAS2	1	D1.1	AGCATGTGGCATAACCTTTC	CCGTTAGGCAAACATGAGCA	AGCATGTGGCATAACCTTTC	CCGTTAGGCAAACATGAGCA	V1A
YIL122W	POG1	1	D1.1	GGCTCACTAACAAGGGCACA	CATACAGTCCTCAGGGCTAT	NA	NA	V1A
YLR027C	AAT2	1	D1.1	GCGCACGATAGATATTTAGC	CTATACCTAATAAGGGAGGC	GCGCACGATAGATATTTAGC	CTATACCTAATAAGGGAGGC	V1A
YKR048C	NAP1	1	D1.1	AATCCTTGGTAAGAGTCGCG	ATTATTTCGCGGGCACGCCT	AATCCTTGGTAAGAGTCGCG	ATTATTTCGCGGGCACGCCT	V1A
YLR285W	NNT1	1	D1.1	CCTTGAGCATAATCGAGATC	GAGATCGTTCCACTGCTGCT	CCTTGAGCATAATCGAGATC	GAGATCGTTCCACTGCTGCT	V1A
YKL108W	SLD2	1	D1.1	AACTTGCGGACAATGCCGGA	AGAGGCATTCAACTTATCCC	AACTTGCGGACAATGCCGGA	AGAGGCATTCAACTTATCCC	V1A
YGL048C	RPT6	1	D1.1	ATAGATTCGGCCACCGGCAT	AATGATACCTCAGTACCGCT	ATAGATTCGGCCACCGGCAT	AATGATACCTCAGTACCGCT	V1A
YOR001W	RRP6	1	D1.1	CGGATATGTACTAATTGGGC	CGCATTCAGTACATTTACCG	CGGATATGTACTAATTGGGC	CGCATTCAGTACATTTACCG	V1A
YNL072W	RNH201	1	D1.1	GCGGCACCATAATTCTACAC	CTCTTTAACTGCCATTACGG	GCGGCACCATAATTCTACAC	CTCTTTAACTGCCATTACGG	V1A
YKR002W	PAP1	1	D1.1	CATCACAGAGGCGGAAAGCC	CAGTCTCATTCACGGATACT	CATCACAGAGGCGGAAAGCC	CAGTCTCATTCACGGATACT	V1A
YDR520C	URC2	1	D1.1	AGCTGACCTCTATATGCCTT	CCTCATTTACACGATTTGGA	AGCTGACCTCTATATGCCTT	CCTCATTTACACGATTTGGA	V1A
YFL013C	IES1	1	D1.1	CGGACATGATAATTTGGGAC	ATTTATGGCGACCCGCACTG	CGGACATGATAATTTGGGAC	ATTTATGGCGACCCGCACTG	V1A
YDR227W	SIR4	1	D1.1	TCACCTACAGATGGGCGAAG	CGTATCGACAAGATGCACAG	TCACCTACAGATGGGCGAAG	CGTATCGACAAGATGCACAG	V1A
YER041W	YEN1	1	D1.1	AACCATTAAGCAGACGTGGC	AACACTTTCCGAAGAGTTGA	TCCATGTATATGAAGGTGCC	NA	V1A
YKR029C	SET3	1	D1.1	GCGCATAGTATATCAGTCTG	CATCGAGATTACCGCGTCTG	GCGCATAGTATATCAGTCTG	CATCGAGATTACCGCGTCTG	V1A
YML073C	RPL6A	1	D1.1	GTGCGAACCAACGTACTACA	GCAGGAACACCACAGGGTTA	GTGCGAACCAACGTACTACA	GCAGGAACACCACAGGGTTA	V1A
YCR086W	CSM1	1	D1.1	AAGACATCAGGATCATGCGG	TCAGAAACCAGCAGTTCGGG	AAGACATCAGGATCATGCGG	TCAGAAACCAGCAGTTCGGG	V1A
YOR048C	RAT1	1	D1.1	GGACCCTTAATAATCATGCC	CCGTAATCATAAGGACTTCC	GGACCCTTAATAATCATGCC	CCGTAATCATAAGGACTTCC	V1A
YPL178W	CBC2	1	D1.1	GCCATCGGTGTCATGTACTT	TCCCAGGATAGCAAGGAGTA	GCCATCGGTGTCATGTACTT	TCCCAGGATAGCAAGGAGTA	V1A
YGL094C	PAN2	1	D1.1	CAGGTACACGCATTCGCTAG	ATGGACGATCTGGTAACACG	CAGGTACACGCATTCGCTAG	ATGGACGATCTGGTAACACG	V1A
YDR052C	DBF4	1	D1.1	TGCAAGACGAAAGTCGCCCA	TAATCGCTACGAATGCTACC	TGCAAGACGAAAGTCGCCCA	TAATCGCTACGAATGCTACC	V1A
YHR167W	THP2	1	D1.1	GGGCTATAAGTCTCTCGAAC	GTTCGACGAGGCGCTATACT	GGGCTATAAGTCTCTCGAAC	GTTCGACGAGGCGCTATACT	V1A
YLR453C	RIF2	1	D1.1	GTATTCCGACTGCGGCACTT	TAACGATGTCGAAGACCGGC	GTATTCCGACTGCGGCACTT	TAACGATGTCGAAGACCGGC	V1A
YHR120W	MSH1	1	D1.1	GAATGGATCTCAAGAGGTAC	GACGATCCTGAATCTAACTC	GAATGGATCTCAAGAGGTAC	GACGATCCTGAATCTAACTC	V1A
YDL220C	CDC13	1	D1.1	TTCGCTTAAACAATCGGCAA	TCTCGGTACAGAGTTTGACG	TTCGCTTAAACAATCGGCAA	TCTCGGTACAGAGTTTGACG	V1A
YML098W	TAF13	1	D1.1	TTATTGGCAGACGCCCATCG	GACGCACTATTTACCATTCG	TTATTGGCAGACGCCCATCG	GACGCACTATTTACCATTCG	V1A
YJR046W	TAH11	1	D1.1	AGTGTTACCACATCGGCAGC	CGGACGACTATAATAATCGC	AGTGTTACCACATCGGCAGC	CGGACGACTATAATAATCGC	V1A
YNL107W	YAF9	1	D1.1	TACCTTAGTCCACTGGGCTG	TATGTTTCTGACCGCTGCGT	TACCTTAGTCCACTGGGCTG	TATGTTTCTGACCGCTGCGT	V1A
YER091C	MET6	1	D1.1	AATGCTAACGCACCAGAGGC	GGGCAGCATAAACACTTCCA	AATGCTAACGCACCAGAGGC	GGGCAGCATAAACACTTCCA	V1A
YBR135W	CKS1	1	D1.1	AATTCGCTCTAAGCTGGGCG	AGTAGGATAGCCTCCCACTG	AATTCGCTCTAAGCTGGGCG	AGTAGGATAGCCTCCCACTG	V1A
YGR074W	SMD1	1	D1.1	GGCATGACTAAAGCCACTCA	AGAGTGCTCCTCATCTACGT	GGCATGACTAAAGCCACTCA	AGAGTGCTCCTCATCTACGT	V1A
YPR068C	HOS1	1	D1.1	ATGTTCGGAAGAGCTGTCTC	TATCTGGTACGAGTGCTGCT	ATGTTCGGAAGAGCTGTCTC	TATCTGGTACGAGTGCTGCT	V1A
YNL330C	RPD3	1	D1.1	AGCCTAGAGGTCTGTGAAAT	AATGAGTGGTCACCTGCCCT	AGCCTAGAGGTCTGTGAAAT	AATGAGTGGTCACCTGCCCT	V1A
YNL317W	PFS2	1	D1.1	TACTCACGCTGTGCTAATCC	GATACCTCTCGATATGCGCG	TACTCACGCTGTGCTAATCC	GATACCTCTCGATATGCGCG	V1A
YLR321C	SFH1	1	D1.1	GCGCTCATAATAAACTCGCA	AGAGGCTCCTCATCCTATCT	GCGCTCATAATAAACTCGCA	AGAGGCTCCTCATCCTATCT	V1A
YML061C	PIF1	1	D1.1	GCAAACGGGTTGTAATTCTG	AGCCACGTCTTACATTTCTG	GCAAACGGGTTGTAATTCTG	AGCCACGTCTTACATTTCTG	V1A
YDL131W	LYS21	1	D1.1	AAGCACATTGTCCTCAAGTC	TGAGACGTTCTGTAACCCGG	AAGCACATTGTCCTCAAGTC	TGAGACGTTCTGTAACCCGG	V1A
YKR008W	RSC4	1	D1.1	GGCAGGCAGTTCATTCAAAT	GCCGAGTCTGTATCATTCGT	GGCAGGCAGTTCATTCAAAT	GCCGAGTCTGTATCATTCGT	V1A
YBR198C	TAF5	1	D1.1	TAGACGATGCGCCATGTCAG	AATAGCAGATACGGCCTGAG	TAGACGATGCGCCATGTCAG	AATAGCAGATACGGCCTGAG	V1A
YBL008W	HIR1	1	D1.1	GGGCTACCTCTCAATTATAC	AGTAATGACCATCTCGACCA	GGGCTACCTCTCAATTATAC	AGTAATGACCATCTCGACCA	V1A
YOL058W	ARG1	1	D1.1	CCTATACTGGAACTGACGCA	ACGACTAGATCATGGTAGTG	CCTATACTGGAACTGACGCA	ACGACTAGATCATGGTAGTG	V1A
YBR253W	SRB6	1	D1.1	GTGCAGGCCAAATGCCACAA	AGCGTACTCTGAATGCCGTC	GTGCAGGCCAAATGCCACAA	AGCGTACTCTGAATGCCGTC	V1A
YLR277C	YSH1	1	D1.1	TAGACACGGTACGAATGCCC	AACGGAATTGAGTCAATCCA	TAGACACGGTACGAATGCCC	AACGGAATTGAGTCAATCCA	V1A
YBR279W	PAF1	1	D1.1	CGAGTAAGTAGAGCTGATTC	CCTAGACGGAGATATGTTTC	CGAGTAAGTAGAGCTGATTC	CCTAGACGGAGATATGTTTC	V1A
YPR025C	CCL1	1	D1.1	TATAGGTCCCGATACGCCGT	ACCCTTTGAGGAGCGGTAAT	TATAGGTCCCGATACGCCGT	ACCCTTTGAGGAGCGGTAAT	V1A
YPR107C	YTH1	1	D1.1	GATAGCTTACCATCTACGCG	TGATTCGTAAGACTGGATCG	GATAGCTTACCATCTACGCG	TGATTCGTAAGACTGGATCG	V1A
YER030W	CHZ1	1	D1.1	TTGCCTGCATCCAGTTAGGG	CAGACGGCGTTAATACCTGG	TTGCCTGCATCCAGTTAGGG	CAGACGGCGTTAATACCTGG	V1A
YPR175W	DPB2	1	D1.1	CTCTCAGGAGGAAGAATGTA	CCTGGCATACAATACAGTCA	CTCTCAGGAGGAAGAATGTA	CCTGGCATACAATACAGTCA	V1A
YNR010W	CSE2	1	D1.1	AGATATTGCCAACCGGCCTA	AATTCGGCTCAACATGGGCC	AGATATTGCCAACCGGCCTA	AATTCGGCTCAACATGGGCC	V1A
YGL037C	PNC1	1	D1.1	ACTCATATTGCATGGCGCTG	ATAGATCCAGCAGATGTGAG	ACTCATATTGCATGGCGCTG	ATAGATCCAGCAGATGTGAG	V1A
YKL216W	URA1	1	D1.1	GCGGTCGATACATTTCTAAG	GAGCGACTCCGATTCGTACT	GCGGTCGATACATTTCTAAG	GAGCGACTCCGATTCGTACT	V1A
YJR017C	ESS1	1	D1.1	GATGAATGCGAACCCAGCAC	ATCTACGCGGACGCATAGTG	GATGAATGCGAACCCAGCAC	ATCTACGCGGACGCATAGTG	V1A
YBR087W	RFC5	1	D1.1	GAACGCACTGCAAGTATGTA	TGCAGGGCAACAAACGTCAA	GAACGCACTGCAAGTATGTA	TGCAGGGCAACAAACGTCAA	V1A
YGL122C	NAB2	1	D1.1	TTACCACTGCCGAGGTGTGT	ACTAACTTTCAAGGATGGCC	TTACCACTGCCGAGGTGTGT	ACTAACTTTCAAGGATGGCC	V1A
YOR189W	IES4	1	D1.1	AACTGCTTCGGAGTAGTGTT	CCGGTGTGTAAAATTCTCTA	AACTGCTTCGGAGTAGTGTT	CCGGTGTGTAAAATTCTCTA	V1A
YOR229W	WTM2	1	D1.1	TTATCGAGCACAGTGTCGGC	TAAGCGATTAGAGCTATGCT	TTATCGAGCACAGTGTCGGC	TAAGCGATTAGAGCTATGCT	V1A
YDR028C	REG1	1	D1.1	ACATAACTTTCCAGAAGCGC	AACTCTCGTGAATCGTTGTC	ACATAACTTTCCAGAAGCGC	AACTCTCGTGAATCGTTGTC	V1A
YGL058W	RAD6	1	D1.1	AATATGCGGAAACCGGGTCA	ATAGTTGGACCACCGTACTC	AATATGCGGAAACCGGGTCA	ATAGTTGGACCACCGTACTC	V1A
YDR182W	CDC1	1	D1.1	ATATGCTCGGAACGTGTCGC	TATGCCAGGTGCCATTCGTT	ATATGCTCGGAACGTGTCGC	TATGCCAGGTGCCATTCGTT	V1A
YEL044W	IES6	1	D1.1	TCCAGAGAGAGCTTCATAAG	GGTTATTACCTCCCACTATG	TCCAGAGAGAGCTTCATAAG	GGTTATTACCTCCCACTATG	V1A
YOL148C	SPT20	1	D1.1	ATTGATACAGGCCGATATGG	GCGTCAGCCACAATCATTAA	ATTGATACAGGCCGATATGG	GCGTCAGCCACAATCATTAA	V1A
YOR052C	#REF!	1	D1.1	ATAGCGACCCAACCGGATGA	ATTGTAATACCAGTTCAGCC	ATAGCGACCCAACCGGATGA	ATTGTAATACCAGTTCAGCC	V1A
YGL066W	SGF73	1	D1.1	CATATAACGCACGATCTAGC	GCTAACCATCAAGCATCGTA	CATATAACGCACGATCTAGC	GCTAACCATCAAGCATCGTA	V1A
YDR451C	YHP1	1	D1.1	TTACTTCGGCCAGTCGAGTG	TATAGGCTCGGCAGTTCGTA	TTACTTCGGCCAGTCGAGTG	TATAGGCTCGGCAGTTCGTA	V1A
YNR052C	POP2	1	D1.1	GCACTCACTACAGATAGATC	ACTGCCTAGCAAGCATGATA	GCACTCACTACAGATAGATC	ACTGCCTAGCAAGCATGATA	V1A
YER169W	RPH1	1	D1.1	CCACATTGTTCAAGGACGGC	CCGACATTACTTAACAGTGC	CCACATTGTTCAAGGACGGC	CCGACATTACTTAACAGTGC	V1A
YLR058C	SHM2	1	D1.1	GGACACTATACAGCATTCTC	CGAGTGCTTAGATGCTAGTT	GGACACTATACAGCATTCTC	CGAGTGCTTAGATGCTAGTT	V1A
YER171W	RAD3	1	D1.1	TTCTACATACCGGCATACAG	TATTCTATGCCACGGCTCGG	TTCTACATACCGGCATACAG	TATTCTATGCCACGGCTCGG	V1A
YNL220W	ADE12	1	D1.1	CTATTCAGGGCAACGGTGTA	TTAGGCACCACAGTACGAAC	CTATTCAGGGCAACGGTGTA	TTAGGCACCACAGTACGAAC	V1A
YNL218W	MGS1	1	D1.1	ACGACCGTCTAACTATGCAG	AACCACTGCGGACATAGGAG	ACGACCGTCTAACTATGCAG	AACCACTGCGGACATAGGAG	V1A
YPR182W	SMX3	1	D1.1	ACCAGTATGTGGAAGCTCAG	CGTAACGTATGCTAAGTGAG	ACCAGTATGTGGAAGCTCAG	CGTAACGTATGCTAAGTGAG	V1A
YDR034C	LYS14	1	D1.1	CCCGTGAGGCTAGAGATTAT	CTATTGGATGTCACGGGATT	CCCGTGAGGCTAGAGATTAT	CTATTGGATGTCACGGGATT	V1A
YIR034C	LYS1	1	D1.1	AGCATTGTCTCAGTCCGTGT	GAGCATGATACAGGATCTTC	AGCATTGTCTCAGTCCGTGT	GAGCATGATACAGGATCTTC	V1A
YKL059C	MPE1	1	D1.1	CCATTATTGGAAGGTTAGGC	CCTTTCGTAGATAGGAGAGT	CCATTATTGGAAGGTTAGGC	CCTTTCGTAGATAGGAGAGT	V1A
YPL082C	MOT1	1	D1.1	CTTCAGCAGGTATTTAAGGG	TCAGGCCAGCTCATTCATGG	CTTCAGCAGGTATTTAAGGG	TCAGGCCAGCTCATTCATGG	V1A
YAL054C	ACS1	1	D1.1	ATTAGCAGCGCCATTACGCG	CCGCTTGATACATTTGATCG	ATTAGCAGCGCCATTACGCG	CCGCTTGATACATTTGATCG	V1A
YFR037C	RSC8	1	D1.1	AGACACCTATTTGTAACGGG	ATATACGGGCCATTCCCTGG	AGACACCTATTTGTAACGGG	ATATACGGGCCATTCCCTGG	V1A
YDR216W	ADR1	1	D1.1	AATCGCTGCTAAGAGCCGAG	CCGGCTTATGAATAGATAGC	AATCGCTGCTAAGAGCCGAG	CCGGCTTATGAATAGATAGC	V1A
YJL074C	SMC3	1	D1.1	GCCGTGAACTTAACTCGATC	GCGGCATACGTTCGTCAAAT	GCCGTGAACTTAACTCGATC	GCGGCATACGTTCGTCAAAT	V1A
YNL136W	EAF7	1	D1.1	GCCAGGGCTATTAACTTTAG	TAAACCTCTTTGAACGGACG	GCCAGGGCTATTAACTTTAG	TAAACCTCTTTGAACGGACG	V1A
YOL145C	CTR9	1	D1.1	TGATCCCACACATATAGAGC	AAACCCGCAGGATGCAGATG	TGATCCCACACATATAGAGC	AAACCCGCAGGATGCAGATG	V1A
YOL021C	DIS3	1	D1.1	GTATGCTCATCATCCCGTAT	CTATCGAGGATCACGGACTG	GTATGCTCATCATCCCGTAT	CTATCGAGGATCACGGACTG	V1A
YHR031C	RRM3	1	D1.1	GGCTACTCGTCATATTACCT	TCCCGCGAAGTAAACATTCA	GGCTACTCGTCATATTACCT	TCCCGCGAAGTAAACATTCA	V1A
YDR079C-A	TFB5	1	D1.1	ACATTCAGATGGACTGCATG	GCAGTTACCGCATAGCTGTG	ACATTCAGATGGACTGCATG	GCAGTTACCGCATAGCTGTG	V1A
YAL011W	SWC3	1	D1.1	AAGGATCTTTCAACAGCTCC	AATTAAGGAGCATGGACCTC	AAGGATCTTTCAACAGCTCC	AATTAAGGAGCATGGACCTC	V1A
YLL026W	HSP104	1	D1.1	TTATCACTGGCGAGAGAGCT	GGCATACGAGAATAGCCCAC	TTATCACTGGCGAGAGAGCT	GGCATACGAGAATAGCCCAC	V1A
YLR376C	PSY3	1	D1.1	AGCCCGGTCTCATCGTTGTT	CACGTTCGCCAAGTACGGTA	AGCCCGGTCTCATCGTTGTT	CACGTTCGCCAAGTACGGTA	V1A
YLR154C	RNH203	1	D1.1	GATTTGCGAACAGCGATCCC	GGAATCATGTGTAACAGGTC	GATTTGCGAACAGCGATCCC	GGAATCATGTGTAACAGGTC	V1A
YNR012W	URK1	1	D1.1	AACACTGGTAAACGGTGCGA	AAGAGTGACGTAACCTCCTC	AACTACTGTAAAGCGGCGGA	ACTAGGGACTAACTTCGCTC	V1A
YDR404C	RPB7	1	D1.1	GCTACACCAACATAGGTTCA	ATATCTGCATCAGGCTGCGG	GCTACACCAACATAGGTTCA	ATATCTGCATCAGGCTGCGG	V1A
YDR155C	CPR1	1	D1.1	AAGCAGTGGGAAGTCTTATC	AATCGACGCTAACGACTGAG	AAGCAGTGGGAAGTCTTATC	AATCGACGCTAACGACTGAG	V1A
YPL204W	HRR25	1	D1.1	GACGATATGATAACCTCTGC	ACTACAGAGACACTTCTAGC	GACGATATGATAACCTCTGC	ACTACAGAGACACTTCTAGC	V1A
YBR095C	RXT2	1	D1.1	CGAACTGAAGGCATATTTCC	TACGGTAACACAGGGTACGC	CCGCTCTACTATAAGAAAGC	GGATAATCTACTTCAACCGC	V1A
YLR395C	COX8	1	D1.1	CTAGATGACATGCTCTCAAG	AGATATGAACCATCGTCCAC	CTAGATGACATGCTCTCAAG	AGATATGAACCATCGTCCAC	V1A
YLR086W	SMC4	1	D1.1	GAGTTATCAGCACCTCCAGC	GCAGCTCTCTCAGTGTTTAT	GAGTTATCAGCACCTCCAGC	GCAGCTCTCTCAGTGTTTAT	V1A
YMR106C	YKU80	1	D1.1	AATGAGCTGGAAGCCTCTGC	CCATGTGGAGAAGATCGTAC	AATGAGCTGGAAGCCTCTGC	CCATGTGGAGAAGATCGTAC	V1A
YAL061W	BDH2	1	D1.1	AGCCACCAGCTAATTGGAGC	AAGATTAACGCACACTTCGC	TCAATCTAGCGGAAGTGAGC	GACTTGCTAACATGCTTCGC	V1A
YFR050C	PRE4	1	D1.1	TACCGATTTACAGGTGCGTG	TTACCGAGTGTATGACAGGT	TACCGATTTACAGGTGCGTG	TTACCGAGTGTATGACAGGT	V1A
YKR082W	NUP133	1	D1.1	AATATGATGCACGCGCTGCC	GCCTGCACCAAATCTTGAAA	AATATGATGCACGCGCTGCC	GCCTGCACCAAATCTTGAAA	V1A
YER116C	SLX8	1	D1.1	GATCCTAGTCCATAGCCTGA	GATCTAGTAGCCTATCGACT	GATCCTAGTCCATAGCCTGA	GATCTAGTAGCCTATCGACT	V1A
YDR075W	PPH3	1	D1.1	CCACTGCTACAAGTCTATGA	TGATGCACTAAATGACCTCA	CCACTGCTACAAGTCTATGA	TGATGCACTAAATGACCTCA	V1A
YKL112W	ABF1	1	D1.1	ATTTAGCGACGAGGATACCG	AAGTATCCCTCACCGTTGAT	NA	NA	V1A
YDL101C	DUN1	1	D1.1	CTATACGCAGGCATGAGACG	CCGCAGATGAAATGTGAGCA	CTATACGCAGGCATGAGACG	CCGCAGATGAAATGTGAGCA	V1A
YDL139C	SCM3	1	D1.1	AACATACGAGGCGGTGCAAT	ATGAGACGGCTAGTACGCCT	NA	NA	V1A
YOR191W	ULS1	1	D1.1	AGAGATCACTGACACCGCAG	GAAGGCATCGTAACTCCGAT	AGAGATCACTGACACCGCAG	GAAGGCATCGTAACTCCGAT	V1A
YNL088W	TOP2	1	D1.1	CATGGTATTACAGGTAGCTG	TCTGGACGCCGATCACTCTG	CATGGTATTACAGGTAGCTG	TCTGGACGCCGATCACTCTG	V1A
YKL114C	APN1	1	D1.1	ACGAGCTAGTTCTCAGTCTC	CCGGCACGTAAAGGAGATCA	ACGAGCTAGTTCTCAGTCTC	CCGGCACGTAAAGGAGATCA	V1A
YML010W	SPT5	1	D1.1	ATAACCACCGGGAAGTGTGA	CCGTGAGATTCAGCTTTATG	ATAACCGCCGGGAAGTGTGA	CCGTGAGATTCAGCTTTATG	V1A
YOL090W	MSH2	1	D1.1	GCGGGCTATACATCATTATC	AGTACAGTCACCATTCAGTC	GCGGGCTATACATCATTATC	AGTACAGTCACCATTCAGTC	V1A
YDL070W	BDF2	1	D1.1	GGTGACTCAACATTGGGTTA	GGGTACATATCAATCTGCAC	GGTGACTCAACATTGGGTTA	GGGTACATATCAATCTGCAC	V1A
YPR187W	RPO26	1	D1.1	AATCTCGAAGACGCCGGAAG	ATGGCGCACACCTTAGACAG	AATCTCGAAGACGCCGGAAG	ATGGCGCACACCTTAGACAG	V1A
YEL071W	DLD3	1	D1.1	ACCATAGTGATGAAGTTGGC	AAGTACAGAGCCACATTTGC	TTGACTAACCGCACGTTGGC	TACAGCACACGCAGCTTTGA	V1A
YDR228C	PCF11	1	D1.1	TGCGATATAATAAGTGAGCC	ACAACGCTATCAAGTATCCA	TGCGATATAATAAGTGAGCC	ACAACGCTATCAAGTATCCA	V1A
YLR035C	MLH2	1	D1.1	TATTCGACCATGCCCAGAAG	CTACTCGTGTGAAGGTTAAG	TATTCGACCATGCCCAGAAG	CTACTCGTGTGAAGGTTAAG	V1A
YFL014W	HSP12	1	D1.1	CCAGCCTGTAAAGGTGTCGA	CCAACCCGGGTTAATGGATG	CCAGCCTGTAAAGGTGTCGA	CCAACCCGGGTTAATGGATG	V1A
YDR532C	KRE28	1	D1.1	TAGTACGTCCGGCAGTTCCT	ACCATAGTTTAACGAGGCGA	NA	NA	V1A
YGR099W	TEL2	1	D1.1	AATAGCTGGTTAAGCCGTCG	ACTTTCTACGGAGGCGTGCT	AATAGCTGGTTAAGCCGTCG	ACTTTCTACGGAGGCGTGCT	V1A
YKL110C	KTI12	1	D1.1	CGCCAGACGTTAGTAATAAG	ATGTACCAGCCAGACACCAG	CGCCAGACGTTAGTAATAAG	ATGTACCAGCCAGACACCAG	V1A
YOR258W	HNT3	1	D1.1	CTATATGAGTACGGCCTCGG	TAGTCTCATCCATCGCTGGA	CTATATGAGTACGGCCTCGG	TAGTCTCATCCATCGCTGGA	V1A
YMR039C	SUB1	1	D1.1	GATAGCTCTAAACTTCCCGA	GGTACATAACCAGTCTCTAC	GATAGCTCTAAACTTCCCGA	GGTACATAACCAGTCTCTAC	V1A
YNL206C	RTT106	1	D1.1	GCTAACCCGTAATTGCTATC	GACCGTAGACTGTTCTGAAT	GCTAACCCGTAATTGCTATC	GACCGTAGACTGTTCTGAAT	V1A
YAL021C	CCR4	1	D1.1	AACCTACGGGCATGTTCGTG	AATAGACCTTCATCGGGCGT	AACCTACGGGCATGTTCGTG	AATAGACCTTCATCGGGCGT	V1A
YNL025C	SSN8	1	D1.1	TCAGACGGTGTCCATACTGT	AGCAGAATTAACGGCCTGTA	TCAGACGGTGTCCATACTGT	AGCAGAATTAACGGCCTGTA	V1A
YMR176W	ECM5	1	D1.1	GCCGTAGTAACAAGCTCACA	GCACTCGTAGTCATGTGTAT	GCCGTAGTAACAAGCTCACA	GCACTCGTAGTCATGTGTAT	V1A
YNL250W	RAD50	1	D1.1	GAGAGTATGCGTTCCACCCT	TGCCCGAAGAGTAAAGTTCA	GAGAGTATGCGTTCCACCCT	TGCCCGAAGAGTAAAGTTCA	V1A
YDR207C	UME6	1	D1.1	GCACTCATTCTCAGTAATCG	TCGCAGTACGTTAAGTGTCG	GCACTCATTCTCAGTAATCG	TCGCAGTACGTTAAGTGTCG	V1A
YOR209C	NPT1	1	D1.1	AATCATGGCTCAGTAGGGAT	GCGATGCTCTCATTAGCCTA	AATCATGGCTCAGTAGGGAT	GCGATGCTCTCATTAGCCTA	V1A
YOL005C	RPB11	1	D1.1	GAAGTGGTCGTCATACTCTC	TTACTAAGTGGCGAGAAGTC	GAAGTGGTCGTCATACTCTC	TTACTAAGTGGCGAGAAGTC	V1A
YOR375C	GDH1	1	D1.1	ATACTCACTGAAGGTCCGGC	AACATCCAGGTGCGGAACGA	ATACTCACTGAAGGTCCGGC	AACATCCAGGTGCGGAACGA	V1A
YDL156W	CMR1	1	D1.1	AACTACTGTAAAGCGGCGGA	ACTAGGGACTAACTTCGCTC	AACACTGGTAAACGGTGCGA	AAGAGTGACGTAACCTCCTC	V1A
YPL122C	TFB2	1	D1.1	CCGCTCTACTATAAGAAAGC	GGATAATCTACTTCAACCGC	CGAACTGAAGGCATATTTCC	TACGGTAACACAGGGTACGC	V1A
YOR341W	RPA190	1	D1.1	TTATAGAGGCTCCCACTCGG	TACGGACTTCCAGTTATGCT	NA	NA	V1A
YMR167W	MLH1	1	D1.1	CAATCCAGGCTATATCGCTG	ATAGGCACGGAATCTTGCGC	CAATCCAGGCTATATCGCTG	ATAGGCACGGAATCTTGCGC	V1A
YMR005W	TAF4	1	D1.1	ACTTGACCGAGTACGTCGTG	GCAGGGATTATCATACTGTG	ACTTGACCGAGTACGTCGTG	GCAGGGATTATCATACTGTG	V1A
YMR061W	RNA14	1	D1.1	ATATTCATCTAAGGCCGCCG	AAGGTTAGCTCATCGGGACT	ATATTCATCTAAGGCCGCCG	AAGGTTAGCTCATCGGGACT	V1A
YGL163C	RAD54	1	D1.1	ATTGTGAGGCACCGCCGAAT	AATTAGTTCTCATGCCGCCT	ATTGTGAGGCACCGCCGAAT	AATTAGTTCTCATGCCGCCT	V1A
YNL124W	NAF1	1	D1.1	GGGCGATCCAAACATATCCA	CAGAGTCGTTTAACTGACGG	GGGCGATCCAAACATATCCA	CAGAGTCGTTTAACTGACGG	V1A
YJR068W	RFC2	1	D1.1	GCCCGGACACAGAATTATTA	GTCCCACGCTAAGAATTAGC	GCCCGGACACAGAATTATTA	GTCCCACGCTAAGAATTAGC	V1A
YOR346W	REV1	1	D1.1	TGACCCAGACCAGTTTGTGC	TTATGCGACCGAGCACTTCG	NA	NA	V1A
YIL131C	FKH1	1	D1.1	AGCTAAGCCCGACGTTTCAG	CATTCAGTTACAGAGGTGAG	AGCTAAGCCCGACGTTTCAG	CATTCAGTTACAGAGGTGAG	V1A
YEL032W	MCM3	1	D1.1	CCAGTCTTCAAACGTGTTCA	CAGACGTTTACAAGCTCGTA	CCAGTCTTCAAACGTGTTCA	CAGACGTTTACAAGCTCGTA	V1A
YLR005W	SSL1	1	D1.1	GCCCTATGATCTAATTGTGC	CTGACGCACGGATCTTTATG	GCCCTATGATCTAATTGTGC	CTGACGCACGGATCTTTATG	V1A
YLR095C	IOC2	1	D1.1	GCGACACCGAGAGCTTATTC	CTTGTCAGAGATAGGCAAAG	GCGACACCGAGAGCTTATTC	CTTGTCAGAGATAGGCAAAG	V1A
YPL254W	HFI1	1	D1.1	CGCTTACTTACATACCGTAG	CCCTTGATGGGACTGTAGTT	CGCTTACTTACATACCGTAG	CCCTTGATGGGACTGTAGTT	V1A
YPR168W	NUT2	1	D1.1	TTTCTAACAGGCGTTGGAAG	ATTCAGGACCCACTGGACAG	TTTCTAACAGGCGTTGGAAG	ATTCAGGACCCACTGGACAG	V1A
YKL028W	TFA1	1	D1.1	ATATCTCACATGCCCGGAAG	GCAGATATAGCATTCTCCGG	ATATCTCACATGCCCGGAAG	GCAGATATAGCATTCTCCGG	V1A
YHR085W	IPI1	1	D1.1	GGGTTACACACCTATATGCC	GCGACTCCATTAACTATACG	GGGTTACACACCTATATGCC	GCGACTCCATTAACTATACG	V1A
YOL104C	NDJ1	1	D1.1	CGTAACATAGGCTCAAGGAC	GCACCAGTAGTCAACTTTCA	CGTAACATAGGCTCAAGGAC	GCACCAGTAGTCAACTTTCA	V1A
YCR042C	TAF2	1	D1.1	TTATCTGGCGTACCGCTCGG	ATTCCTGGGACACTTCTGGG	TTATCTGGCGTACCGCTCGG	ATTCCTGGGACACTTCTGGG	V1A
YPR070W	MED1	1	D1.1	TATGTACTCGCAGCAGCTCG	ATTGGAGTGCCACCATCTGC	TATGTACTCGCAGCAGCTCG	ATTGGAGTGCCACCATCTGC	V1A
YDR156W	RPA14	1	D1.1	GACCCGATTCCATTTACTTG	CTCGGCTAGGATAGAGAAAT	GACCCGATTCCATTTACTTG	CTCGGCTAGGATAGAGAAAT	V1A
YGR124W	ASN2	1	D1.1	GCACGGACATCATCATAATC	GCCATTGAGAAACATTCCCA	GCACGGACATCATCATAATC	GCCATTGAGAAACATTCCCA	V1A
YDR217C	RAD9	1	D1.1	GGCGTATCCCAGATGTCCTC	TCCGGCAACCAATGGGAAGA	GGCGTATCCCAGATGTCCTC	TCCGGCAACCAATGGGAAGA	V1A
YDL160C	DHH1	1	D1.1	CGGAAGTCTGGTGAATCTAG	GGATACGATCTACGCACACG	CGGAAGTCTGGTGAATCTAG	GGATACGATCTACGCACACG	V1A
YKR017C	HEL1	1	D1.1	TAGGCTATCCTCCACGTATT	ACAGATGTAATAACCCGTCC	TATGAGCCGGTACGTGTATT	AGGTACTTTCAACTGCGTCC	V1A
YDL182W	LYS20	1	D1.1	GTACTGGACTCCTAGCTCTT	TAGTACGGGATAAGGCAGTC	GTACTGGACTCCTAGCTCTT	TAGTACGGGATAAGGCAGTC	V1A
YMR273C	ZDS1	1	D1.1	AGCCGGTGATCGAGTTCTTT	CCCGGAACGTCAATGAGAAC	AGCCGGTGATCGAGTTCTTT	CCCGGAACGTCAATGAGAAC	V1A
YDL047W	SIT4	1	D1.1	TTGTACGACGCAGTCTTCCC	TATGTCGGACGCCGTAGACT	TTGTACGACGCAGTCTTCCC	TATGTCGGACGCCGTAGACT	V1A
YML074C	FPR3	1	D1.1	ATACTCTGCGAAGCGGTAGC	GAGCATACACCAGTCTTAGC	ATACTCTGCGAAGCGGTAGC	GAGCATACACCAGTCTTAGC	V1A
YER120W	SCS2	1	D1.1	AAGCTCCTGTAACTCTAGCG	ACATACTTTGCAGGTAGTGG	AAGCTCCTGTAACTCTAGCG	ACATACTTTGCAGGTAGTGG	V1A
YML121W	GTR1	1	D1.1	TTACGCTTCACACTCGTGGG	TTGGCGGGCCCAGCTATTCT	TTACGCTTCACACTCGTGGG	TTGGCGGGCCCAGCTATTCT	V1A
YLR216C	CPR6	1	D1.1	GCTCCAGAGACATATTGAGA	AATTCAGCGGCACACAGGTC	GCTCCAGAGACATATTGAGA	AATTCAGCGGCACACAGGTC	V1A
YHR154W	RTT107	1	D1.1	TGGCAGCTAATCAACACCTA	TCAGTCGAGCCGATGGATCT	NA	NA	V1A
YJR035W	RAD26	1	D1.1	ATTTAGCCGTAATGCCGCCG	ATACGTTAGGCACCTGGACT	ATTTAGCCGTAATGCCGCCG	ATACGTTAGGCACCTGGACT	V1A
YOR014W	RTS1	1	D1.1	TGCATGGCCTTACAGGTCTG	GCCCATCCGCAATATGTATA	TGCATGGCCTTACAGGTCTG	GCCCATCCGCAATATGTATA	V1A
YBR115C	LYS2	1	D1.1	ATGATACTAGCATCGAGGCG	ACTAGAGCTGCCTTAATGCG	ATGATACTAGCATCGAGGCG	ACTAGAGCTGCCTTAATGCG	V1A
YOR151C	RPB2	1	D1.1	TATCACGTCGCATGTAGTGG	GACGATTCTACAGTCCTTGA	TATCACGTCGCATGTAGTGG	GACGATTCTACAGTCCTTGA	V1A
YBR195C	MSI1	1	D1.1	GGCAGCAGAGTTAATTCATC	AGGTCAGACAGCATTCGCTC	GGCAGCAGAGTTAATTCATC	AGGTCAGACAGCATTCGCTC	V1A
YLR135W	SLX4	1	D1.1	CATGGATCAACAGCCGCTTA	TGTCCACACAGGTAGAACAC	CATGGATCAACAGCCGCTTA	TGTCCACACAGGTAGAACAC	V1A
YMR239C	RNT1	1	D1.1	CCTAGAGACGTAGATATGCG	GTACCCGGTTTGAAAAGTCG	CCTAGAGACGTAGATATGCG	GTACCCGGTTTGAAAAGTCG	V1A
YLR418C	CDC73	1	D1.1	CCCATACATTGTTAGAAGGC	CATAGAGGTTAAGCGATACG	CCCATACATTGTTAGAAGGC	CATAGAGGTTAAGCGATACG	V1A
YFL029C	CAK1	1	D1.1	CCACACTTCTATAAGGGCAG	CACCCAGACCGATTAAGGAG	CCACACTTCTATAAGGGCAG	CACCCAGACCGATTAAGGAG	V1A
YPL240C	HSP82	1	D1.1	ATACCTTCGGCAGGATGCTG	TACAGCCATGAATCTATCGC	ATACCTTCGGCAGGATGCTG	TACAGCCATGAATCTATCGC	V1A
YKR062W	TFA2	1	D1.1	GCTCAACAGAACTGCATTCA	ATATCTTGACGAGCTGCCGG	GCTCAACAGAACTGCATTCA	ATATCTTGACGAGCTGCCGG	V1A
YPR179C	HDA3	1	D1.1	GATGATATGGCATTCCAGTG	ATGGACCTCTACCGCGTATG	GATGATATGGCATTCCAGTG	ATGGACCTCTACCGCGTATG	V1A
YBR175W	SWD3	1	D1.1	CTCCTAATGTACGCTAAGAG	AACACTCGTTGGAATGTGAG	CTCCTAATGTACGCTAAGAG	AACACTCGTTGGAATGTGAG	V1A
YDR098C	GRX3	1	D1.1	AGATGTAGAGCATATACCGG	CAGACATCACGATATGGCGC	AGATGTAGAGCATATACCGG	CAGACATCACGATATGGCGC	V1A
YJL006C	CTK2	1	D1.1	GATCGTACTCACCATGTATC	AGAGACGACCTAAGCCAGTC	GATCGTACTCACCATGTATC	AGAGACGACCTAAGCCAGTC	V1A
YER092W	IES5	1	D1.1	GAGTAATCACCAGTGTGCCC	GGCCTCTACGAATATAATCC	GAGTAATCACCAGTGTGCCC	GGCCTCTACGAATATAATCC	V1A
YAL038W	CDC19	1	D1.1	CATAGGTGTAAATTCGCGGA	CGTAATAACGAATCGCTCAC	CATAGGTGTAAATTCGCGGA	CGTAATAACGAATCGCTCAC	V1A
YNL273W	TOF1	1	D1.1	ATCGTTTGAAGACTTGGTCG	ACCTTTGGAGGATGGTATCT	ATCGTTTGAAGACTTGGTCG	ACCTTTGGAGGATGGTATCT	V1A
YIL084C	SDS3	1	D1.1	ATGTCGCACACCCGATGAAG	CATAGGGTCGTACATTCCGG	ATGTCGCACACCCGATGAAG	CATAGGGTCGTACATTCCGG	V1A
YPR133C	SPN1	1	D1.1	GGCTCTAACCAACCGGAAGA	GAGGGCCTATTCCTTCCATT	GGCTCTAACCAACCGGAAGA	GAGGGCCTATTCCTTCCATT	V1A
YOL006C	TOP1	1	D1.1	AATAGGCGCTAAGCTGATAG	AATCAGTATGAAGCGAGCGC	AATAGGCGCTAAGCTGATAG	AATCAGTATGAAGCGAGCGC	V1A
YDL091C	UBX3	1	D1.1	CGCTATCATGTCATCGAATG	GAGATCCAGGTCGCTACATG	CGCTATCATGTCATCGAATG	GAGATCCAGGTCGCTACATG	V1A
YKL005C	BYE1	1	D1.1	CACTGCGTGTTAAGGATATG	CTAGCTGATACATTGGCAGA	CACTGCGTGTTAAGGATATG	CTAGCTGATACATTGGCAGA	V1A
YDR510W	SMT3	1	D1.1	CATTAGCCAACATGCTGTGA	TCACTCGGTGCATGAGGACT	CATTAGCCAACATGCTGTGA	TCACTCGGTGCATGAGGACT	V1A
YGR042W	#REF!	1	D1.1	GATAAGCCCTAAGGCAGGTC	GGAGTTCGACCTACTGCCAT	GATAAGCCCTAAGGCAGGTC	GGAGTTCGACCTACTGCCAT	V1A
YCR020W-B	HTL1	1	D1.1	GCGCCACAGCACTTAATATA	TCATCTGCGACACGGATTGG	GCGCCACAGCACTTAATATA	TCATCTGCGACACGGATTGG	V1A
YER148W	SPT15	1	D1.1	CCTCTACAGCAAGTGGAATA	CTCATGTAGTGACAGTGCTG	CCTCTACAGCAAGTGGAATA	CTCATGTAGTGACAGTGCTG	V1A
YDR502C	SAM2	1	D1.1	AAGGGCATCCAAGTTGTTGA	GATTATTGTCAAGCCTCGCC	AAGGGCATCCAAGTTGTTGA	GATTATTGTCAAGCCTCGCC	V1A
YMR117C	SPC24	1	D1.1	TATGAGCCGGTACGTGTATT	AGGTACTTTCAACTGCGTCC	TAGGCTATCCTCCACGTATT	ACAGATGTAATAACCCGTCC	V1A
YDR026C	NSI1	1	D1.1	GACTATGGCGTGTCACCGTT	TAAGGACTGATAAGCCGGTC	GACTATGGCGTGTCACCGTT	TAAGGACTGATAAGCCGGTC	V1A
YIL061C	SNP1	1	D1.1	GCGCTGCCATAATCCAAATA	TATACTGATGCAGACGGCTG	GCGCTGCCATAATCCAAATA	TATACTGATGCAGACGGCTG	V1A
YBL035C	POL12	1	D1.1	ACAGCTCTTAAACGGTGGGA	AATTGAGGCTAACGCCCGTC	AATTCTTCTAAACCGGCGGA	AAAGCACCTTGAACGGGCTC	V1A
YBR081C	SPT7	1	D1.1	ATACCACGCCAAGAGGGTGA	AACACGACGCGAATGTAGCC	ATACCACGCCAAGAGGGTGA	AACACGACGCGAATGTAGCC	V1A
YIL112W	HOS4	1	D1.1	ATCTTCACGGGCCAGTAGTG	ATAGGCACTTCACCAGCGTG	ATCTTCACGGGCCAGTAGTG	ATAGGCACTTCACCAGCGTG	V1A
YGL202W	ARO8	1	D1.1	ATATGCGGCTACATCCCTGG	CAAGAGACGCTAATTGCGGC	ATATGCGGCTACATCCCTGG	CAAGAGACGCTAATTGCGGC	V1A
YOR243C	PUS7	1	D1.1	ACAGTATGGACAGTTCCGCG	AAAGGCCAGTGGATTCATGA	ACAGTATGGACAGTTCCGCG	AAAGGCCAGTGGATTCATGA	V1A
YPR161C	SGV1	1	D1.1	TTTACTCGGGCCAGGTGCAT	TATACCGTCCGAGGTGATGT	TTTACTCGGGCCAGGTGCAT	TATACCGTCCGAGGTGATGT	V1A
YNL007C	SIS1	1	D1.1	CCACGATACCAATTCATAGA	CTAGATAGACGACGCTACAG	CCACGATACCAATTCATAGA	CTAGATAGACGACGCTACAG	V1A
YPL022W	RAD1	1	D1.1	TATAGTCCAGTCCAGGCACG	TACTTAGGCGCATCAGTTGG	TATAGTCCAGTCCAGGCACG	TACTTAGGCGCATCAGTTGG	V1A
YNL118C	DCP2	1	D1.1	GGGTACTTCACCATTCCTAG	CACACGGCATGGGATTAACG	GGGTACTTCACCATTCCTAG	CACACGGCATGGGATTAACG	V1A
YPL235W	RVB2	1	D1.1	TATATGTGGACCAGTATGCG	GAGTTACGCACCTACAGTCG	TATATGTGGACCAGTATGCG	GAGTTACGCACCTACAGTCG	V1A
YPL126W	NAN1	1	D1.1	ACAGACTCCCTAAGATGCAG	TATCCCAGCCCATGAGGAGA	ACAGACTCCCTAAGATGCAG	TATCCCAGCCCATGAGGAGA	V1A
YPL139C	UME1	1	D1.1	CGAGATAAGGTGCGATCACT	ACGCAGTGAGTAGCATCCTG	CGAGATAAGGTGCGATCACT	ACGCAGTGAGTAGCATCCTG	V1A
YHR197W	RIX1	1	D1.1	GATGTCACCTAACTCATGTC	TCAGATGTGACAAGAGTCGA	GATGTCACCTAACTCATGTC	TCAGATGTGACAAGAGTCGA	V1A
YDL126C	CDC48	1	D1.1	CCCTGAAGTCTTGCCAATTA	ATATTGTGCAGCGCCCACTG	CCCTGAAGTCTTGCCAATTA	ATATTGTGCAGCGCCCACTG	V1A
YMR236W	TAF9	1	D1.1	GAGACTACTGAACCTTCGGC	GACGGTACTCCATTTGTATG	GAGACTACTGAACCTTCGGC	GACGGTACTCCATTTGTATG	V1A
YBR160W	CDC28	1	D1.1	TTCTTACACACCCAGGAGAG	TAGATAGCCAGCCACCATAG	TTCTTACACACCCAGGAGAG	TAGATAGCCAGCCACCATAG	V1A
YER089C	PTC2	1	D1.1	GGCTAACCTTCAATGACTAT	TAGAGTTCCACACAGTGACC	GGCTAACCTTCAATGACTAT	TAGAGTTCCACACAGTGACC	V1A
YMR182C	RGM1	1	D1.1	CGACCTGCTAGATTATTCCT	CACCTAGAGTTCTTGCAGTT	CGACCTGCTAGATTATTCCT	CACCTAGAGTTCTTGCAGTT	V1A
YNL085W	MKT1	1	D1.1	ACGCCGACATTGCATTCAAG	CGGCGGTAACGATTATTAAG	ACGCCGACATTGCATTCAAG	CGGCGGTAACGATTATTAAG	V1A
YOL094C	RFC4	1	D1.1	GTACAATAACCACTGAGGCC	AAGGTACAGCGACCATGTCC	GTACAATAACCACTGAGGCC	AAGGTACAGCGACCATGTCC	V1A
YLR134W	PDC5	1	D1.1	CAACTAGCCGCAAGGGAGTA	CGCACCTAGATAAGATTTCC	CAACTAGCCGCAAGGGAGTA	CGCACCTAGATAAGATTTCC	V1A
YBR049C	REB1	1	D1.1	TAGTACGCAGCATCTGGACG	TGAGCAGGTACATCTTCCGG	TAGTACGCAGCATCTGGACG	TGAGCAGGTACATCTTCCGG	V1A
YKL214C	YRA2	1	D1.1	GGGATCACTAAACTACCTCA	GCGCTGAAGAGAACGGTAAC	GGGATCACTAAACTACCTCA	GCGCTGAAGAGAACGGTAAC	V1A
YER142C	MAG1	1	D1.1	TCCTCGACGCGATGGCATAT	GAGGTCATCAGACGTATATG	TCCTCGACGCGATGGCATAT	GAGGTCATCAGACGTATATG	V1A
YCL040W	GLK1	1	D1.1	CAGAGCTGTGCAATGATCCC	GCGCCATCACAAGATTTACA	CAGAGCTGTGCAATGATCCC	GCGCCATCACAAGATTTACA	V1A
YFR013W	IOC3	1	D1.1	AAGCCAGCAGCATTCCTAAG	GCCTACCGTATAATATCCAG	AAGCCAGCAGCATTCCTAAG	GCCTACCGTATAATATCCAG	V1A
YPL194W	DDC1	1	D1.1	GTCGCATCGTGCTCAACTTG	TGAGATCCGCTACATGCTCG	GTCGCATCGTGCTCAACTTG	TGAGATCCGCTACATGCTCG	V1A
YDR289C	RTT103	1	D1.1	CCAGTGATCCAATTCTGTGA	GAGCATGAGGTACTATGACT	CCAGTGATCCAATTCTGTGA	GAGCATGAGGTACTATGACT	V1A
YBR089C-A	NHP6B	1	D1.1	GAACAACCAAGACGTGTGTC	GACTCCGTACTCACTAGGAT	GAACAACCAAGACGTGTGTC	GACTCCGTACTCACTAGGAT	V1A
YKL074C	MUD2	1	D1.1	AAGTATCTCGCACCGGCATG	TTCACGGAGCGCAGATCATG	AAGTATCTCGCACCGGCATG	TTCACGGAGCGCAGATCATG	V1A
YDL116W	NUP84	1	D1.1	TGGACGAGGACAACCACTCA	TAATTCCAGCGAAGTCTGCC	TAAGTCTTCACAAGCCGTCA	TAGAGTAGCACACCTTTGCC	V1A
YOR279C	RFM1	1	D1.1	CAATAGTGGGCAAGCAGTTA	GAGCACCTGGCATTGTCCAT	CAATAGTGGGCAAGCAGTTA	GAGCACCTGGCATTGTCCAT	V1A
YFL017W-A	SMX2	1	D1.1	CAGATCATGGAATATCACGC	CACATTTAGCAACCGCTGTA	CAGATCATGGAATATCACGC	CACATTTAGCAACCGCTGTA	V1A
YDR469W	SDC1	1	D1.1	GTACTCCGGTTCAGCATGTT	TAGGAGCTACCAGGACCTTC	GTACTCCGGTTCAGCATGTT	TAGGAGCTACCAGGACCTTC	V1A
YDL076C	RXT3	1	D1.1	ATTACCCACGGGAGACATCG	AGCCAAAGAAGACTGTGTCG	ATTACCCACGGGAGACATCG	AGCCAAAGAAGACTGTGTCG	V1A
YPL181W	CTI6	1	D1.1	GAGTGCTATCCACGAGACTG	ACATCGCCAGCAGGATTGAG	GAGTGCTATCCACGAGACTG	ACATCGCCAGCAGGATTGAG	V1A
YER022W	SRB4	1	D1.1	TTGTACCCACTAGACGTGCG	TTGAGTGTCCGACATACCCT	TTGTACCCACTAGACGTGCG	TTGAGTGTCCGACATACCCT	V1A
YDL164C	CDC9	1	D1.1	ACAGCTCTGCTAAGATGGAG	CCTCTACTCTAAGCTATGAG	ACAGCTCTGCTAAGATGGAG	CCTCTACTCTAAGCTATGAG	V1A
YOL135C	MED7	1	D1.1	TCCTTGTCGGCGATGCGATT	ACATAGTGAGAACTTGGGAC	TCCTTGTCGGCGATGCGATT	ACATAGTGAGAACTTGGGAC	V1A
YMR053C	STB2	1	D1.1	GATACTGTCACACCGTTGCG	GAGCGCCCTATACTATCTAT	GATACTGTCACACCGTTGCG	GAGCGCCCTATACTATCTAT	V1A
YGL090W	LIF1	1	D1.1	GCCAGATGTCAACACAGCTA	TCAGGCGCAGAACTGTAGAC	GCCAGATGTCAACACAGCTA	TCAGGCGCAGAACTGTAGAC	V1A
YOR179C	SYC1	1	D1.1	AGACTGACGCAAGGCACCTA	GAGTCCCTGGCATCTGATCT	AGACTGACGCAAGGCACCTA	GAGTCCCTGGCATCTGATCT	V1A
YEL019C	MMS21	1	D1.1	TATTGGGAGCCAGGTTTCGT	TCGCGGACTCTACGGTATGT	TATTGGGAGCCAGGTTTCGT	TCGCGGACTCTACGGTATGT	V1A
YPL138C	SPP1	1	D1.1	CGTTGATAGCAAGCGAGATA	AGCGAGCAGCCATTTATCCG	CGTTGATAGCAAGCGAGATA	AGCGAGCAGCCATTTATCCG	V1A
YJR082C	EAF6	1	D1.1	GCGTGACAGTTTGTTCAATT	GAGGCGACTTCATTGATACT	GCGTGACAGTTTGTTCAATT	GAGGCGACTTCATTGATACT	V1A
YDR419W	RAD30	1	D1.1	CATAGATGGAAATCGGCGCA	CGATCACTTCGACTCATGTG	CATAGATGGAAATCGGCGCA	CGATCACTTCGACTCATGTG	V1A
YPR019W	MCM4	1	D1.1	GCTCGTATTCAAGATCATCA	GTAGTTACTGCCACCCTATG	TTATAGCACCCATGACGGGC	CCTATTATGGGAATGTGTGC	V1A
YDL105W	NSE4	1	D1.1	ACTTCTGCCACGGGTGACAT	AGATTTACGTCATCCCAGCT	ACTTCTGCCACGGGTGACAT	AGATTTACGTCATCCCAGCT	V1A
YJR140C	HIR3	1	D1.1	TACGAAACTAAATCGGCTGC	TGAGAGGACTCCACGACATC	TACGAAACTAAATCGGCTGC	TGAGAGGACTCCACGACATC	V1A
YDR191W	HST4	1	D1.1	CAGATCAGGGAACTTAACGC	CCAGCGAGTTAACGAGTTAG	CAGATCAGGGAACTTAACGC	CCAGCGAGTTAACGAGTTAG	V1A
YHR118C	ORC6	1	D1.1	ATCGTAGTGTCACGGCTTGT	CGCCGTGTGAAACATACTAA	ATCGTAGTGTCACGGCTTGT	CGCCGTGTGAAACATACTAA	V1A
YOR298C-A	MBF1	1	D1.1	CCACTCAGATCATATCCTAG	GATGATACTGAACACCAGCC	CCACTCAGATCATATCCTAG	GATGATACTGAACACCAGCC	V1A
YDR363W-A	SEM1	1	D1.1	GCATCCTGCACAATGAAGCA	TAATGGACATGACGCGACAG	GCATCCTGCACAATGAAGCA	TAATGGACATGACGCGACAG	V1A
YLR113W	HOG1	1	D1.1	TGGAATACCCACGAACGGAC	CCATAAGACGTTGTGAAGCC	TGGAATACCCACGAACGGAC	CCATAAGACGTTGTGAAGCC	V1A
YPL184C	MRN1	1	D1.1	GACTGTCTCTCATGCCTGGT	CATCTGACACTGGTGCTAAT	GACTGTCTCTCATGCCTGGT	CATCTGACACTGGTGCTAAT	V1A
YPL061W	ALD6	1	D1.1	CTATACCAAACATACGGGTC	TAAGGACGGCTAACCTCTTC	CTATACCAAACATACGGGTC	TAAGGACGGCTAACCTCTTC	V1A
YHR090C	YNG2	1	D1.1	AGCTCACAGTACAGAGACTC	ATAGCTCGCCAATGGGCCTA	AGCTCACAGTACAGAGACTC	ATAGCTCGCCAATGGGCCTA	V1A
YDL084W	SUB2	1	D1.1	CTAGTGTAATCAGGCTGTCG	CGCGTATCATCATTACTTCG	CTAGTGTAATCAGGCTGTCG	CGCGTATCATCATTACTTCG	V1A
YHR077C	NMD2	1	D1.1	CATATAGGATAATGGGCCAG	CCAGCTAGGCAATCATACTA	CATATAGGATAATGGGCCAG	CCAGCTAGGCAATCATACTA	V1A
YKL113C	RAD27	1	D1.1	CTATCACGGGTCAGGAGTCT	CGATCTTGGGTCACAGCGTT	CTATCACGGGTCAGGAGTCT	CGATCTTGGGTCACAGCGTT	V1A
YOL004W	SIN3	1	D1.1	TATGGAACGACATCCGAGCC	AGCACACGTAGGAACTATCC	TATGGAACGACATCCGAGCC	AGCACACGTAGGAACTATCC	V1A
YCL061C	MRC1	1	D1.1	CGGGAAGATTTATGCAATGC	GGCCGCATTAGTTAGAAATC	TTGAGGACTCGCCACAATGC	AACCAGCGCGGAAGTTTGCA	V1A
YPL128C	TBF1	1	D1.1	GGTGTACCTCCAACTTACTA	GAACGTCGCGGACTTGATTT	GGTGTACCTCCAACTTACTA	GAACGTCGCGGACTTGATTT	V1A
YDR176W	NGG1	1	D1.1	TGAGCCGCTTGCACTAGAGT	GCAGTTCGCATCATACCTTG	TGAGCCGCTTGCACTAGAGT	GCAGTTCGCATCATACCTTG	V1A
YGL173C	XRN1	1	D1.1	TTCGACGCGAGACTCTAGTG	GATTTCCACTCATATCCGTG	TTCGACGCGAGACTCTAGTG	GATTTCCACTCATATCCGTG	V1A
YJL090C	DPB11	1	D1.1	AAATTCCGCTGCGTCAGGGT	CTCGGACGAACAACGGTGAA	AAATTCCGCTGCGTCAGGGT	CTCGGACGAACAACGGTGAA	V1A
YDL201W	TRM8	1	D1.1	CCGATTTGCACAATGTCTCA	ATGCAGTCGTCACGTCTCGT	CCGATTTGCACAATGTCTCA	ATGCAGTCGTCACGTCTCGT	V1A
YAR003W	SWD1	1	D1.1	AGGGCTCGTCGATTCGTCTT	CCATAAGGTAAATCGGTCGA	AGGGCTCGTCGATTCGTCTT	CCATAAGGTAAATCGGTCGA	V1A
YCL016C	DCC1	1	D1.1	ATGAGGCGTCGAACTCTTCC	AACTGCGTGGAATTTCGCTC	ATGAGGCGTCGAACTCTTCC	AACTGCGTGGAATTTCGCTC	V1A
YLR117C	CLF1	1	D1.1	TGTTAGTGCCGCGCTACCTC	AGGAAGTACGTCTCCCAAGA	TATAGCGTCTAGCCGACTTC	AGATGACCGGAACTTCGTCC	V1A
YPL129W	TAF14	1	D1.1	CCGGTTGCCAAAGCGAGAAA	CGAGGAGAAGAAGTTCCCAC	CCGGTTGCCAAAGCGAGAAA	CGAGGAGAAGAAGTTCCCAC	V1A
YBL093C	ROX3	1	D1.1	CCTTTGAAGCAAGCAGAGGA	TGCACTAGCCAAGACACGGA	CCTTTGAAGCAAGCAGAGGA	TGCACTAGCCAAGACACGGA	V1A
YEL061C	CIN8	1	D1.1	ATTGATGACCGACCGACACG	ACTTTCCTAGCAGTGAGCGG	ATTGATGACCGACCGACACG	ACTTTCCTAGCAGTGAGCGG	V1A
YDR295C	HDA2	1	D1.1	CAAGCAGGAGTGACATCGCG	TAATGAGGTCGAATGTCTGC	CAAGCAGGAGTGACATCGCG	TAATGAGGTCGAATGTCTGC	V1A
YAL019W	FUN30	1	D1.1	TTTCACGCTGCCAGTGTCTG	AAGGCTGATGAATGCTGATC	TTTCACGCTGCCAGTGTCTG	AAGGCTGATGAATGCTGATC	V1A
YPL015C	HST2	1	D1.1	AACGGACGAGCAGTACCTAG	ATATTCCCAGCGGGCTAACG	AACGGACGAGCAGTACCTAG	ATATTCCCAGCGGGCTAACG	V1A
YBR057C	MUM2	1	D1.1	TGCAGTAAGCTCAATCACAC	AGTAGGCACTCTCCTCAATG	TGCAGTAAGCTCAATCACAC	AGTAGGCACTCTCCTCAATG	V1A
YMR275C	BUL1	1	D1.1	CAGTTATAGCCATTGAGCCG	CATCACGTTAAAGCACGCGA	CAGTTATAGCCATTGAGCCG	CATCACGTTAAAGCACGCGA	V1A
YKL032C	IXR1	1	D1.1	TTATAGCACCCATGACGGGC	CCTATTATGGGAATGTGTGC	GCTCGTATTCAAGATCATCA	GTAGTTACTGCCACCCTATG	V1A
YNL112W	DBP2	1	D1.1	AGTGGGATCTCCTCAAGCTC	GGCCTCCACGAGAAGCAATA	AGTGGGATCTCCTCAAGCTC	GGCCTCCACGAGAAGCAATA	V1A
YGR056W	RSC1	1	D1.1	AACCCTTTGTAAGCGGTGCG	TCACGTAGCGCGATGTCTGT	AACCCTTTGTAAGCGGTGCG	TCACGTAGCGCGATGTCTGT	V1A
YPR135W	CTF4	3	D1.2	CTATACATGGAGCTAAGACG	TCGACCTGTGCCAGTCATGT	CTATACATGGAGCTAAGACG	TCGACCTGTGCCAGTCATGT	V1B
YNL258C	DSL1	3	D1.2	CCATCGAGTTAAGGATTACG	CCTTATAGCGTAGTCGATGT	CCATCGAGTTAAGGATTACG	CCTTATAGCGTAGTCGATGT	V1B
YDR181C	SAS4	3	D1.2	TACTTCAGTCCAGTCGCGTG	TCGAGGTACGTTGACGCATT	TACTTCAGTCCAGTCGCGTG	TCGAGGTACGTTGACGCATT	V1B
YDR172W	SUP35	3	D1.2	ATAGTGAGGCCATACTCCCG	AAGTTTGCATCCTCCACTGT	ATAGTGAGGCCATACTCCCG	AAGTTTGCATCCTCCACTGT	V1B
YLR115W	CFT2	3	D1.2	GGAGACTTACTGGCAAATTG	CTAGCGCGACTTGGATCATT	GGAGACTTACTGGCAAATTG	CTAGCGCGACTTGGATCATT	V1B
YMR091C	NPL6	3	D1.2	ACTTCGACTGGATATGCTGT	TAACGCTCGGTAGACGGCTT	ACTTCGACTGGATATGCTGT	TAACGCTCGGTAGACGGCTT	V1B
YIL132C	CSM2	3	D1.2	TCATTTGCGTAAGCGGTCCG	CGTGACGTATGAGTTACTGT	TCATTTGCGTAAGCGGTCCG	CGTGACGTATGAGTTACTGT	V1B
YDR460W	TFB3	3	D1.2	AAACCCAAGGTAGCTGTTCT	CGGACCCGTGTCTGCAATTT	AAACCCAAGGTAGCTGTTCT	CGGACCCGTGTCTGCAATTT	V1B
YDL042C	SIR2	3	D1.2	ATAAGTCGTAGGAATGTCGC	ATACGAGGCACAGGGTCTTT	ATAAGTCGTAGGAATGTCGC	ATACGAGGCACAGGGTCTTT	V1B
YDL097C	RPN6	3	D1.2	AATGATAGGTAATCGGACCG	ACCTTTCTGGAGACGGGGAT	AATGATAGGTAATCGGACCG	ACCTTTCTGGAGACGGGGAT	V1B
YBR215W	HPC2	3	D1.2	GGATAGTGCCTACCGACTCT	TAGGGCGACCTGTCCCATTT	GGATAGTGCCTACCGACTCT	TAGGGCGACCTGTCCCATTT	V1B
YBR223C	TDP1	3	D1.2	ATACTCACCGGACGTACAGG	AGGGTCCTGTCACCTATTCT	ATACTCACCGGACGTACAGG	AGGGTCCTGTCACCTATTCT	V1B
YOR330C	MIP1	3	D1.2	ATTTGGGACTACCGGCCTCT	CCGGAACGGTATTGAGATTT	ATTTGGGACTACCGGCCTCT	CCGGAACGGTATTGAGATTT	V1B
YNR050C	LYS9	3	D1.2	CCAGGAAGGCCAAGCATTGA	TGTCCAACTAGCTCCAAGTA	CCAGGAAGGCCAAGCATTGA	TGTCCAACTAGCTCCAAGTA	V1B
YGR186W	TFG1	3	D1.2	AAGGGTCCGTTCACCTGCTT	TCTTAGGCGCTAGGCGTCTT	AAGGGTCCGTTCACCTGCTT	TCTTAGGCGCTAGGCGTCTT	V1B
YGL213C	SKI8	3	D1.2	TTATCGGACGCACTTCCAGG	TTTCGGACTATGCCCGGTGT	TTATCGGACGCACTTCCAGG	TTTCGGACTATGCCCGGTGT	V1B
YFL023W	BUD27	3	D1.2	GGACAGATGACATTAGGTTC	GTTACCTACTTCTACACGGT	GGACAGATGACATTAGGTTC	GTTACCTACTTCTACACGGT	V1B
YOR025W	HST3	3	D1.2	TACAGACCCGCATTCGTAGG	CGGACGTATCGACTTTGTGT	TACAGACCCGCATTCGTAGG	CGGACGTATCGACTTTGTGT	V1B
YDR427W	RPN9	3	D1.2	TATGGTCACACGCCTCGAAG	CTTAATGGGTCATGTACGGT	TATGGTCACACGCCTCGAAG	CTTAATGGGTCATGTACGGT	V1B
YNL262W	POL2	3	D1.2	CCACTGGATACAGATTCATC	CATAGCGGCAAAGCGCGTAA	CCACTGGATACAGATTCATC	CATAGCGGCAAAGCGCGTAA	V1B
YEL046C	GLY1	3	D1.2	GCTACACACACAGAGTTGGA	CTATTGTGGAAAGTGTTGCA	GCTACACACACAGAGTTGGA	CTATTGTGGAAAGTGTTGCA	V1B
YDR180W	SCC2	3	D1.2	GGCCTTTACTAACTCTACAG	TTACTCGTGAGACTTGCGGT	GGCCTTTACTAACTCTACAG	TTACTCGTGAGACTTGCGGT	V1B
YJR052W	RAD7	3	D1.2	GGCACTGAGCAACCATCATA	CTTATAGCTGCTTGGTGATG	GGCACTGAGCAACCATCATA	CTTATAGCTGCTTGGTGATG	V1B
YOL093W	TRM10	3	D1.2	ATCAGACTAGGCCATAAGGG	ATATCGGTGTCCAGGCTTGT	ATCAGACTAGGCCATAAGGG	ATATCGGTGTCCAGGCTTGT	V1B
YGL150C	INO80	3	D1.2	TATTCGGCCTCATGTTGCCT	TTATTCTGCGGCGGGCACTT	TATTCGGCCTCATGTTGCCT	TTATTCTGCGGCGGGCACTT	V1B
YDR443C	SSN2	3	D1.2	GAGTTCCCACCAGATGGATC	GTACTCTAAGTCACGATCTC	GAGTTCCCACCAGATGGATC	GTACTCTAAGTCACGATCTC	V1B
YLR354C	TAL1	3	D1.2	TACTGGGCACGATTGTCGCT	AAGGTTTGCTACCCTCCGTT	TACTGGGCACGATTGTCGCT	AAGGTTTGCTACCCTCCGTT	V1B
YMR076C	PDS5	3	D1.2	TCACATTGGCGGAAGTCTGC	GCGCAACAAGCATGTCGTAC	TCACATTGGCGGAAGTCTGC	GCGCAACAAGCATGTCGTAC	V1B
YEL018W	EAF5	3	D1.2	AATTAGTTCGACGCGCCGCT	TCGGCTAGTATGGTAGACTT	AATTAGTTCGACGCGCCGCT	TCGGCTAGTATGGTAGACTT	V1B
YKL033W	TTI1	3	D1.2	CCATGCGAGCAACTGAGATA	ATTGGGCATCCATCATTCTG	CCATGCGAGCAACTGAGATA	ATTGGGCATCCATCATTCTG	V1B
YHR207C	SET5	3	D1.2	ATCAGTCGTGCATTGCGGCT	GGTATCCTACTCGACTCGTT	ATCAGTCGTGCATTGCGGCT	GGTATCCTACTCGACTCGTT	V1B
YJR119C	JHD2	3	D1.2	TAATGTGATGGGAGCGTCTC	CTGGCCGTGCAAGAAAGCAA	TAATGTGATGGGAGCGTCTC	CTGGCCGTGCAAGAAAGCAA	V1B
YCR082W	AHC2	3	D1.2	CCGAGGATTGTTTAGCATCT	AGTGGACGCTCCCTATACTT	CCGAGGATTGTTTAGCATCT	AGTGGACGCTCCCTATACTT	V1B
YLR223C	IFH1	3	D1.2	AAGCGATTGGCAGTCCTTCT	GCCGTGATTATGTAGACCTT	AAGCGATTGGCAGTCCTTCT	GCCGTGATTATGTAGACCTT	V1B
YDR279W	RNH202	3	D1.2	GACTACTAGCCATCGGACTG	TTGGCGACTCGTGCGACATT	GACTACTAGCCATCGGACTG	TTGGCGACTCGTGCGACATT	V1B
YMR201C	RAD14	3	D1.2	AGGCAGATCCCATTCAGACG	GACGACGCTTTCATTCATGT	AGGCAGATCCCATTCAGACG	GACGACGCTTTCATTCATGT	V1B
YDR069C	DOA4	3	D1.2	TTACATCGGACCGTACTGCG	TATGACGTTCTACAGACCCT	TTACATCGGACCGTACTGCG	TATGACGTTCTACAGACCCT	V1B
YJL080C	SCP160	3	D1.2	TATGCCGGTACACTTGCGTG	AAAGGCAAGTTCGGCGCATT	TATGCCGGTACACTTGCGTG	AAAGGCAAGTTCGGCGCATT	V1B
YOR295W	UAF30	3	D1.2	TATTGTCAGCCAGGTTCCCG	CATAGAGCGTTCTGCACTGT	TATTGTCAGCCAGGTTCCCG	CATAGAGCGTTCTGCACTGT	V1B
YGL113W	SLD3	3	D1.2	ATAGCTCATTAACCGGCACG	ACTGATTTCTAATGGCGCGG	ATAGCTCATTAACCGGCACG	ACTGATTTCTAATGGCGCGG	V1B
YKL067W	YNK1	3	D1.2	ACCCGTTGTAGATGGTCTGT	ATGGTGCCTTCATCCGGCTT	ACCCGTTGTAGATGGTCTGT	ATGGTGCCTTCATCCGGCTT	V1B
YLR153C	ACS2	3	D1.2	TAGTTACGACGCGCCACTTG	TTTGATCCGCTCTCACGGGT	TAGTTACGACGCGCCACTTG	TTTGATCCGCTCTCACGGGT	V1B
YHL025W	SNF6	3	D1.2	CGATGCTTAGTCAGTGATCT	CTAGCCAGGTTGGAGAATTT	CGATGCTTAGTCAGTGATCT	CTAGCCAGGTTGGAGAATTT	V1B
YIL143C	SSL2	3	D1.2	AACGTATCGGAAGCATAGGC	AGTTCAACAGTGCGTCCAAG	AACGTATCGGAAGCATAGGC	AGTTCAACAGTGCGTCCAAG	V1B
YPL024W	RMI1	3	D1.2	TACCGTAGGCGGAGATCATT	GGCACCTGTGTCGTCATCTT	TACCGTAGGCGGAGATCATT	GGCACCTGTGTCGTCATCTT	V1B
YNL102W	POL1	3	D1.2	TTCTACGGCGTGGCAGACTT	CGGATACGCGGATTCCTCTT	TTCTACGGCGTGGCAGACTT	CGGATACGCGGATTCCTCTT	V1B
YDR014W	RAD61	3	D1.2	AAGGTATCATCCGACACCGG	AAACGCGACTTGACCTCAGT	AAGGTATCATCCGACACCGG	AAACGCGACTTGACCTCAGT	V1B
YJL176C	SWI3	3	D1.2	CTAGAAGCATCATTGCCTCT	AGCCGGGTCTTCATAGATTT	CTAGAAGCATCATTGCCTCT	AGCCGGGTCTTCATAGATTT	V1B
YML069W	POB3	3	D1.2	AGATGAGACGCACGACACTC	GAGGAGTAGACATCTTAGTC	AGATGAGACGCACGACACTC	GAGGAGTAGACATCTTAGTC	V1B
YJR136C	TTI2	3	D1.2	ATCTAGGCGTTCAGGTGCTT	AGAGAGGTTTGCATCGTCTT	ATCTAGGCGTTCAGGTGCTT	AGAGAGGTTTGCATCGTCTT	V1B
YMR231W	PEP5	3	D1.2	GGGAGTCGTCCACCTCTTTG	ACCGTGTGACTCAGTTTCGT	GGGAGTCGTCCACCTCTTTG	ACCGTGTGACTCAGTTTCGT	V1B
YHR182W	#REF!	3	D1.2	TTATACCGGCCCATTGCAGG	TTACTGGCTCTCAGCGGTGT	TTATACCGGCCCATTGCAGG	TTACTGGCTCTCAGCGGTGT	V1B
YML041C	VPS71	3	D1.2	CGAGCTTACTAACTTGGTTC	AAAGTTCCGGTCACCACGGT	CGAGCTTACTAACTTGGTTC	AAAGTTCCGGTCACCACGGT	V1B
YGR159C	NSR1	3	D1.2	GAGTTCACTACACCCTTAGG	GAACCCGTCTTCTACATTGT	GAGTTCACTACACCCTTAGG	GAACCCGTCTTCTACATTGT	V1B
YDR288W	NSE3	3	D1.2	TAGCATACCAGCCCATGAAG	TTTGGTACGCTAGACCCGGT	TAGCATACCAGCCCATGAAG	TTTGGTACGCTAGACCCGGT	V1B
YCR073W-A	SOL2	3	D1.2	TTCTAGTCGAGACGTTCCGG	ATAGGCGTCGGCACACTTGT	TTCTAGTCGAGACGTTCCGG	ATAGGCGTCGGCACACTTGT	V1B
YLR449W	FPR4	3	D1.2	CCTCCAGATGAATAACTGAC	GCGCGGGATCAATTTAATGA	CCTCCAGATGAATAACTGAC	GCGCGGGATCAATTTAATGA	V1B
YIR010W	DSN1	3	D1.2	TATAGAGTGCAGCCCACCAG	CCAGGTCTTCCATTTGCGGT	TATAGAGTGCAGCCCACCAG	CCAGGTCTTCCATTTGCGGT	V1B
YIL153W	RRD1	3	D1.2	GGCATAGCGCAACACTCATA	TCCTGAACCCTCATGTGATG	GGCATAGCGCAACACTCATA	TCCTGAACCCTCATGTGATG	V1B
YBR275C	RIF1	3	D1.2	TTATGTCCGCCATTCCAGGG	AGACTACGGTTCATGCTTGT	TTATGTCCGCCATTCCAGGG	AGACTACGGTTCATGCTTGT	V1B
YBL079W	NUP170	3	D1.2	GAGACCTGCTCATTTATCCT	TGTTGTACCCGCTGGCACTT	GAGACCTGCTCATTTATCCT	TGTTGTACCCGCTGGCACTT	V1B
YOR386W	PHR1	3	D1.2	GGGACCTTTCTGCATTCGCT	TGCGATACCTGATCTCCGTT	GGGACCTTTCTGCATTCGCT	TGCGATACCTGATCTCCGTT	V1B
YDL055C	PSA1	3	D1.2	TAGTGCTCCGCATGATCGCT	CTTTAGCGGATCGGCGACTT	TAGTGCTCCGCATGATCGCT	CTTTAGCGGATCGGCGACTT	V1B
YDL074C	BRE1	3	D1.2	TCCTAGACCGTATATCGGCT	AAAGATGCCGGGACCTCGTT	TCCTAGACCGTATATCGGCT	AAAGATGCCGGGACCTCGTT	V1B
YOR174W	MED4	3	D1.2	CGCCGTTATTACAAAGCAAC	AATACGGAGTTAGCAGACTG	CGCCGTTATTACAAAGCAAC	AATACGGAGTTAGCAGACTG	V1B
YLL036C	PRP19	3	D1.2	ACGAGGACGCGATTCTATCT	ATATGAGCGCGGGACTACTT	ACGAGGACGCGATTCTATCT	ATATGAGCGCGGGACTACTT	V1B
YJL076W	NET1	3	D1.2	TAGGACGCCTCAGATTGGCT	CTAGCCTTTAGGATGAGGTT	TAGGACGCCTCAGATTGGCT	CTAGCCTTTAGGATGAGGTT	V1B
YDR353W	TRR1	3	D1.2	ACTCTTCGATCACGGGTTCT	ATGAGGAGGCTATCGACCTT	ACTCTTCGATCACGGGTTCT	ATGAGGAGGCTATCGACCTT	V1B
YER088C	DOT6	3	D1.2	TCAGTGACTTCAATGCTGCC	GCGCGACATAAAGCATTCCA	TCAGTGACTTCAATGCTGCC	GCGCGACATAAAGCATTCCA	V1B
YJL050W	MTR4	3	D1.2	AGGGCTCTATTCAGCGTATC	CCCTGCCGTAAATGAATACA	AGGGCTCTATTCAGCGTATC	CCCTGCCGTAAATGAATACA	V1B
YJR043C	POL32	3	D1.2	ATATGGGCAGCACCCTACTG	TATTCTGATGGGCGGACATT	ATATGGGCAGCACCCTACTG	TATTCTGATGGGCGGACATT	V1B
YBR112C	CYC8	3	D1.2	ACCAGTGATATGAATGAGGC	CGCCATTTCTGTAAGACCGG	ACCAGTGATATGAATGAGGC	CGCCATTTCTGTAAGACCGG	V1B
YMR224C	MRE11	3	D1.2	ATATTGGCCTACCGCCGACG	TGCGTCAGTACCCTTCATGT	ATATTGGCCTACCGCCGACG	TGCGTCAGTACCCTTCATGT	V1B
YNL312W	RFA2	3	D1.2	GATTAGCTCACATACCTTGC	AGAGCAGAGACATTATTCCC	GATTAGCTCACATACCTTGC	AGAGCAGAGACATTATTCCC	V1B
YKL185W	ASH1	3	D1.2	CACGTAGTGCCATTTCTCTG	ATGTAGGCCGCGTTCCCATT	CACGTAGTGCCATTTCTCTG	ATGTAGGCCGCGTTCCCATT	V1B
YML127W	RSC9	3	D1.2	TATGAGATCAGGCCACACCG	ATCTCCCGTCGAGTGGATGT	TATGAGATCAGGCCACACCG	ATCTCCCGTCGAGTGGATGT	V1B
YPL055C	LGE1	3	D1.2	ACCGAGGCGATCATTTCGTG	ACGGATGACGCTTTCGCATT	ACCGAGGCGATCATTTCGTG	ACGGATGACGCTTTCGCATT	V1B
YLR141W	RRN5	3	D1.2	TTATTCCGCCTAGCAGGTGG	TCCACACGCCGATTGGTAGT	TTATTCCGCCTAGCAGGTGG	TCCACACGCCGATTGGTAGT	V1B
YER173W	RAD24	3	D1.2	CATGTAGGCTAATCGGATAC	AGATACAGGACATTCAGCGT	CATGTAGGCTAATCGGATAC	AGATACAGGACATTCAGCGT	V1B
YJL173C	RFA3	3	D1.2	ACTCACGGCTGCATGGATTG	CCTGGGACCGTATTATCATT	ACTCACGGCTGCATGGATTG	CCTGGGACCGTATTATCATT	V1B
YLR436C	ECM30	3	D1.2	AATACTGACTTCCACCGTGT	ATACGGTGGTCATTCGGCTT	AATACTGACTTCCACCGTGT	ATACGGTGGTCATTCGGCTT	V1B
YNL216W	RAP1	3	D1.2	TCTAGCCTACGAGGGACTTG	TATCAGTTCCGCAGACGGGT	TCTAGCCTACGAGGGACTTG	TATCAGTTCCGCAGACGGGT	V1B
YPR052C	NHP6A	3	D1.2	GAGATCGAGCCATTCTTCCG	AGGCTGACGCTACTACCTGT	GAGATCGAGCCATTCTTCCG	AGGCTGACGCTACTACCTGT	V1B
YML062C	MFT1	3	D1.2	AGTGATTTCCCGCCATATCT	CAGGGCGCTTGTTAGAATTT	AGTGATTTCCCGCCATATCT	CAGGGCGCTTGTTAGAATTT	V1B
YBL032W	HEK2	3	D1.2	ACGGAGGATGTAGCTTCATT	GCTCTCCGAGTGTCGATCTT	ACGGAGGATGTAGCTTCATT	GCTCTCCGAGTGTCGATCTT	V1B
YDR013W	PSF1	3	D1.2	ATTATAGTCCGACAGGCCCG	ACCTTGTGGGTAATGCGTAT	ATTATAGTCCGACAGGCCCG	ACCTTGTGGGTAATGCGTAT	V1B
YER164W	CHD1	3	D1.2	TAACTCGCTGGCATGACTCT	CTATCGACTGGGAGGCATTT	TAACTCGCTGGCATGACTCT	CTATCGACTGGGAGGCATTT	V1B
YOL034W	SMC5	3	D1.2	CAGTGGATCTAACGTGATAG	ATCCTATACACATGGAGCGA	CAGTGGATCTAACGTGATAG	ATCCTATACACATGGAGCGA	V1B
YDL106C	PHO2	3	D1.2	GACGCCTGTTCATGCTACTT	AATGTGACGGCGACGCTCTT	GACGCCTGTTCATGCTACTT	AATGTGACGGCGACGCTCTT	V1B
YCR065W	HCM1	3	D1.2	AATTCGCCATCAGGTTCCGG	AGTTGCTATACCTCCCTAGT	AATTCGCCATCAGGTTCCGG	AGTTGCTATACCTCCCTAGT	V1B
YPL116W	HOS3	3	D1.2	GATACGTGCGTGCATCCTCT	GGGAGCTGATTATCCGATTT	GATACGTGCGTGCATCCTCT	GGGAGCTGATTATCCGATTT	V1B
YDR097C	MSH6	3	D1.2	TAGATCGAGACAGGGTACTC	CCTAACTAGAGATATGCGTC	TAGATCGAGACAGGGTACTC	CCTAACTAGAGATATGCGTC	V1B
YPL075W	GCR1	3	D1.2	GCGCGTCTGCTTTGCATCTT	CTACTGGATTGAGAGGTCTT	GCGCGTCTGCTTTGCATCTT	CTACTGGATTGAGAGGTCTT	V1B
YMR023C	MSS1	3	D1.2	ATTAGCGTCTCGACTACCTT	TCCGGTACTACAATACGAGA	ATTAGCGTCTCGACTACCTT	TCCGGTACTACAATACGAGA	V1B
YJR109C	CPA2	3	D1.2	TAGAGTTGTCCCACCTCAGG	GACTGTCTCGTCATCGGTGT	TAGAGTTGTCCCACCTCAGG	GACTGTCTCGTCATCGGTGT	V1B
YNL138W	SRV2	3	D1.2	CCTGCGCGGCAAGAACATAA	GAGACTGCGTCATGCCTTCT	CCTGCGCGGCAAGAACATAA	GAGACTGCGTCATGCCTTCT	V1B
YGR275W	RTT102	3	D1.2	GATATGGACTAAGCCTGTTC	ATGATTATCGCCCGCACGGT	GATATGGACTAAGCCTGTTC	ATGATTATCGCCCGCACGGT	V1B
YGR002C	SWC4	3	D1.2	ACGCGTTCAGGCGGACCTTT	CCGGCAGGTCAATTAAGTTA	ACGCGTTCAGGCGGACCTTT	CCGGCAGGTCAATTAAGTTA	V1B
YIR018W	YAP5	3	D1.2	ACCTTAGACCGAGTTACAGG	TTAGCCCTCCGATACGGTGT	ACCTTAGACCGAGTTACAGG	TTAGCCCTCCGATACGGTGT	V1B
YDR399W	HPT1	3	D1.2	ACGCCCTAAGGTGTCTGAAG	TTACGGTTCAGATGCCCGGT	ACGCCCTAAGGTGTCTGAAG	TTACGGTTCAGATGCCCGGT	V1B
YPL047W	SGF11	3	D1.2	CTTCAGAGTAGACTAGATGG	TCCGAGAGGCAACGACATGA	CTTCAGAGTAGACTAGATGG	TCCGAGAGGCAACGACATGA	V1B
YMR205C	PFK2	3	D1.2	TATTTCCAACGACCTAGCGG	AGGTATTCGCCTCCACTTGT	TATTTCCAACGACCTAGCGG	AGGTATTCGCCTCCACTTGT	V1B
YCR052W	RSC6	3	D1.2	ATAGTGGTCTAACCGCCCAG	TTGATTCCGCCTGCATCGGT	ATAGTGGTCTAACCGCCCAG	TTGATTCCGCCTGCATCGGT	V1B
YNL261W	ORC5	3	D1.2	ATTGCATCCACATGGTTCGC	TCTAGGGACTCAGATTGATG	ATTGCATCCACATGGTTCGC	TCTAGGGACTCAGATTGATG	V1B
YOR064C	YNG1	3	D1.2	TAGAGGTCGGCATAGCTCCT	CCAACTGGAGGGATGCACTT	TAGAGGTCGGCATAGCTCCT	CCAACTGGAGGGATGCACTT	V1B
YHR058C	MED6	3	D1.2	TATTCATGGCGCACCGTCTG	CAGCATGGTGAATAACTTCC	TATTCATGGCGCACCGTCTG	CAGCATGGTGAATAACTTCC	V1B
YPR074C	TKL1	3	D1.2	TTCGCTAGTCGAGCTTCGCT	CTAGTGGCCTTCAGTCCGTT	TTCGCTAGTCGAGCTTCGCT	CTAGTGGCCTTCAGTCCGTT	V1B
YMR223W	UBP8	3	D1.2	CATCTCAGAGTAGTAAGGAG	ACACTGATGGAACAGGTAGC	CATCTCAGAGTAGTAAGGAG	ACACTGATGGAACAGGTAGC	V1B
YKL022C	CDC16	3	D1.2	ACTTTCTCGGGATAGAGGCT	GCGCTGACCGTATTCGACTT	ACTTTCTCGGGATAGAGGCT	GCGCTGACCGTATTCGACTT	V1B
YHR205W	SCH9	3	D1.2	ACAGCCCCTCTAAGTGATAG	AGATAGGACTTCCCACAACA	ACAGCCCCTCTAAGTGATAG	AGATAGGACTTCCCACAACA	V1B
YNL215W	IES2	3	D1.2	TTACGAGGTCGGTACACTCT	GCGCTACTGCTATACTACTT	TTACGAGGTCGGTACACTCT	GCGCTACTGCTATACTACTT	V1B
YDR386W	MUS81	3	D1.2	ATGATGACCGCACTGACTGG	GCAGACAGTAAACCTGGCGA	ATGATGACCGCACTGACTGG	GCAGACAGTAAACCTGGCGA	V1B
YLR182W	SWI6	3	D1.2	TTTAGGCAGCTCACCATGCG	AGTACGTCCTACATTTCTCG	TTTAGGCAGCTCACCATGCG	AGTACGTCCTACATTTCTCG	V1B
YKL058W	TOA2	3	D1.2	AGACTAGGGTGCAGATTTCT	ATTACCTGGGCGAGGACCTT	AGACTAGGGTGCAGATTTCT	ATTACCTGGGCGAGGACCTT	V1B
YLR175W	CBF5	3	D1.2	GTGAGATTCCTATCCACCTG	GTACCGTTCATCCTGACATT	GTGAGATTCCTATCCACCTG	GTACCGTTCATCCTGACATT	V1B
YDR296W	MHR1	3	D1.2	CAGGTCGATGAATGTAGATC	ACGATATAGCGATCTACCGG	CAGGTCGATGAATGTAGATC	ACGATATAGCGATCTACCGG	V1B
YER029C	SMB1	3	D1.2	AAGTCTCGGTAACCTCGACG	CTTCACTGATTGCCAGATGT	AAGTCTCGGTAACCTCGACG	CTTCACTGATTGCCAGATGT	V1B
YER095W	RAD51	3	D1.2	TTACTGCGTACCAGGAGTCG	TAGACGGTTCGCATTAGCCT	TTACTGCGTACCAGGAGTCG	TAGACGGTTCGCATTAGCCT	V1B
YGR016W	#REF!	3	D1.2	AAGATGATGTAAGCGCACGC	TTATCCGGCGACCGTGATGT	AAGATGATGTAAGCGCACGC	TTATCCGGCGACCGTGATGT	V1B
YMR235C	RNA1	3	D1.2	TATATCGTAGTCCAGAGGTG	AACCAGTAGCTCCGGGCATT	TATATCGTAGTCCAGAGGTG	AACCAGTAGCTCCGGGCATT	V1B
YBR114W	RAD16	3	D1.2	TATTACCTGGCACACGGTGG	TCCTTCGGAGTCGATGTAGT	TATTACCTGGCACACGGTGG	TCCTTCGGAGTCGATGTAGT	V1B
YDL140C	RPO21	3	D1.2	TTAGGTCTATCACAGCGCCG	ATTCCCGTAGCCGAGACTGT	TTAGGTCTATCACAGCGCCG	ATTCCCGTAGCCGAGACTGT	V1B
YBR245C	ISW1	3	D1.2	ATGCGGAGTCCACGCTATTG	GAAGGCGCTTTGCACTCATT	NA	NA	V1B
YGL244W	RTF1	3	D1.2	TACTTTACCGGAGTGCGTGT	ATTACCCGTGCGATGGGCTT	TACTTTACCGGAGTGCGTGT	ATTACCCGTGCGATGGGCTT	V1B
YDL017W	CDC7	3	D1.2	CCAAGTCTAGGGATCTATCT	CCGTAGCGTTTCACGAATTT	CCAAGTCTAGGGATCTATCT	CCGTAGCGTTTCACGAATTT	V1B
YDL002C	NHP10	3	D1.2	ACTAATCTTGAATTGGCGGC	ATCGTAAGCCGACGTGACAG	ACTAATCTTGAATTGGCGGC	ATCGTAAGCCGACGTGACAG	V1B
YLR033W	RSC58	3	D1.2	ATATTCCGCGTAATCTTCCG	AGACTATACTACGGTGACCT	ATATTCCGCGTAATCTTCCG	AGACTATACTACGGTGACCT	V1B
YGL133W	ITC1	3	D1.2	GATGCTATTCCACTGACTCT	ACTAGACGCGGTTGGCATTT	GATGCTATTCCACTGACTCT	ACTAGACGCGGTTGGCATTT	V1B
YBL054W	TOD6	3	D1.2	TACGGAGTGGTCAGTTACTT	AGGTAGCCTATACTGCTCTT	TACGGAGTGGTCAGTTACTT	AGGTAGCCTATACTGCTCTT	V1B
YDR257C	RKM4	3	D1.2	ATACTGTTACCACGGTGCGG	ACCTCTTAGTCACGCCTAGT	ATACTGTTACCACGGTGCGG	ACCTCTTAGTCACGCCTAGT	V1B
YBR011C	IPP1	3	D1.2	TATACGGCGCGAGATCCTCT	CTCTTGACGGTGAGCGATTT	TATACGGCGCGAGATCCTCT	CTCTTGACGGTGAGCGATTT	V1B
YGL201C	MCM6	3	D1.2	ATTGGTGATCCCGGCCTCTT	TACGGTATGCGATAGGTCTT	ATTGGTGATCCCGGCCTCTT	TACGGTATGCGATAGGTCTT	V1B
YGL127C	SOH1	3	D1.2	ACTACATTGCCAGCTTGTTC	CTATTGAGCTGGATCACGGT	ACTACATTGCCAGCTTGTTC	CTATTGAGCTGGATCACGGT	V1B
YIR008C	PRI1	3	D1.2	AAGATGGCAGGGCTCCCTTT	CAATCGGTTCCAACGAGTTA	AAGATGGCAGGGCTCCCTTT	CAATCGGTTCCAACGAGTTA	V1B
YLR116W	MSL5	3	D1.2	ATATTAGGTCCCACGCACGG	GAGAGCCTTCTGTCCATTGT	ATATTAGGTCCCACGCACGG	GAGAGCCTTCTGTCCATTGT	V1B
YDR266C	HEL2	3	D1.2	AACGCCTAAGCAGTTTGAAG	ATTGTTGCCGTCATCCCGGT	AACGCCTAAGCAGTTTGAAG	ATTGTTGCCGTCATCCCGGT	V1B
YJR024C	MDE1	3	D1.2	GCAGTAGTTCTAATACGCGG	ACTGCGACTGTAGGACTCGT	GCAGTAGTTCTAATACGCGG	ACTGCGACTGTAGGACTCGT	V1B
YGL135W	RPL1B	3	D1.2	ACGCATAGACTTTAAGCCAG	GCTACGTTTCGCATATCGGT	ACGCATAGACTTTAAGCCAG	GCTACGTTTCGCATATCGGT	V1B
YDL181W	INH1	3	D1.2	TACTTTACGGCATTCGAGGG	GATACCGTCGTCGATCTTGT	TACTTTACGGCATTCGAGGG	GATACCGTCGTCGATCTTGT	V1B
YHR041C	SRB2	3	D1.2	ATTTGGCAGGCCCTAGTCCT	GGCGATAGTTTCGATCACTT	ATTTGGCAGGCCCTAGTCCT	GGCGATAGTTTCGATCACTT	V1B
YML034W	SRC1	3	D1.2	TGGAGTACCCTACACGTCAG	ATTTATGCCCTGCACCGGGT	TGGAGTACCCTACACGTCAG	ATTTATGCCCTGCACCGGGT	V1B
YLR265C	NEJ1	3	D1.2	CGCAGGGTAGTCATTTCGCT	ATGTTCAGGGCTCCAGCGTT	CGCAGGGTAGTCATTTCGCT	ATGTTCAGGGCTCCAGCGTT	V1B
YMR263W	SAP30	3	D1.2	ATTACGTGTCGCATCCGGCT	TCTCTGCGGATAGCGGACTT	ATTACGTGTCGCATCCGGCT	TCTCTGCGGATAGCGGACTT	V1B
YNL246W	VPS75	3	D1.2	AATACTTGATGACGAGGGCT	GAATGTTCCCTACGCTCGTT	AATACTTGATGACGAGGGCT	GAATGTTCCCTACGCTCGTT	V1B
YKR010C	TOF2	3	D1.2	ACCGTGATCTCAGTTACTCT	GGGAGCCTCTGATCCTACTT	ACCGTGATCTCAGTTACTCT	GGGAGCCTCTGATCCTACTT	V1B
YAL059W	ECM1	3	D1.2	GACCGAGGTTCTTTAATGCT	TTTGACCGGCTCCGTAGGTT	GACCGAGGTTCTTTAATGCT	TTTGACCGGCTCCGTAGGTT	V1B
YCR081W	SRB8	3	D1.2	AGCACCCTGGTCATGTTTCT	CAGATGCTGTCACGGACCTT	AGCACCCTGGTCATGTTTCT	CAGATGCTGTCACGGACCTT	V1B
YKL060C	FBA1	3	D1.2	ATGCACGACTTCTGAGCAAT	CATATAGACTCAGGGATAGG	ATGCACGACTTCTGAGCAAT	CATATAGACTCAGGGATAGG	V1B
YGR116W	SPT6	3	D1.2	TTATTGCTCACGAGGCCCTG	ACCTAACGAGGGTTGACATT	TTATTGCTCACGAGGCCCTG	ACCTAACGAGGGTTGACATT	V1B
YGL025C	PGD1	3	D1.2	GACTACCACGGATTAGGACG	ATCCTACGGGTCGCAGATGT	GACTACCACGGATTAGGACG	ATCCTACGGGTCGCAGATGT	V1B
YLL022C	HIF1	3	D1.2	AAGCCAAACGAACTTGCGGC	AAACATGTAGTGAACGGTGC	AAGCCAAACGAACTTGCGGC	AAACATGTAGTGAACGGTGC	V1B
YAL051W	OAF1	3	D1.2	CTTAGAGCTAGAGAGTTCTG	CGGGATTTCATGCTGCCATT	CTTAGAGCTAGAGAGTTCTG	CGGGATTTCATGCTGCCATT	V1B
YGR192C	TDH3	3	D1.2	TATTCATAGGGACCGCGTCG	TACCTTTGTGCAGGGTGCCT	TATTCATAGGGACCGCGTCG	TACCTTTGTGCAGGGTGCCT	V1B
YGR156W	PTI1	3	D1.2	GCCTTTACTTAACTAGACCG	AGGCTCTCAGTCCACTATGT	GCCTTTACTTAACTAGACCG	AGGCTCTCAGTCCACTATGT	V1B
YFL008W	SMC1	3	D1.2	TAGTCTTAGCCAGTACGGTG	CCGAGCTATTTCATGGCATT	TAGTCTTAGCCAGTACGGTG	CCGAGCTATTTCATGGCATT	V1B
YDR195W	REF2	3	D1.2	TTACGTCCGAGCAGACTTGG	TTGGTAGTCAGCCTCCACGT	TTACGTCCGAGCAGACTTGG	TTGGTAGTCAGCCTCCACGT	V1B
YLR272C	YCS4	3	D1.2	ATAGTGATACCAGCTCGCCG	ATATACCGCTAGGCGACTGT	ATAGTGATACCAGCTCGCCG	ATATACCGCTAGGCGACTGT	V1B
YGR258C	RAD2	3	D1.2	GCACGCACGGCAGTTTATTG	CGACGGTACTTGGACTCATT	GCACGCACGGCAGTTTATTG	CGACGGTACTTGGACTCATT	V1B
YGR218W	CRM1	3	D1.2	TACCTATCTGCGATGGGTGT	ACAGTGCGCTTCATTGGCTT	TACCTATCTGCGATGGGTGT	ACAGTGCGCTTCATTGGCTT	V1B
YLR103C	CDC45	3	D1.2	GAGGCTCTTCCAGTCTATCT	ATTGGCATCGCGCCGAATTT	GAGGCTCTTCCAGTCTATCT	ATTGGCATCGCGCCGAATTT	V1B
YGR274C	TAF1	3	D1.2	ATAGTCCGGGAACTGTATGC	AGATCACTCTAACGCCTCAG	ATAGTCCGGGAACTGTATGC	AGATCACTCTAACGCCTCAG	V1B
YNL290W	RFC3	3	D1.2	TAGAGCGATCCACATCATTC	ATCATTGTTGCAGGTCAGGT	TAGAGCGATCCACATCATTC	ATCATTGTTGCAGGTCAGGT	V1B
YER070W	RNR1	3	D1.2	CCGCGTTAGTCATATACTCT	AACTGCGGATTCGTGCATTT	CCGCGTTAGTCATATACTCT	AACTGCGGATTCGTGCATTT	V1B
YBR193C	MED8	3	D1.2	TCACTGTAGCGAGTCGTAGT	ATGATGGGCTGACCTCCCTT	TCACTGTAGCGAGTCGTAGT	ATGATGGGCTGACCTCCCTT	V1B
YGR209C	TRX2	3	D1.2	ACCGTGGATCGAGTTGTCTT	CCATGAATTAAACGGGTCGA	ACCGTGGATCGAGTTGTCTT	CCATGAATTAAACGGGTCGA	V1B
YPR034W	ARP7	3	D1.2	CATTCATAGGCATTGAGAGG	TTACCTTTCCGCGAGGGTGT	CATTCATAGGCATTGAGAGG	TTACCTTTCCGCGAGGGTGT	V1B
YMR247C	RKR1	3	D1.2	GCGCTAACTCGACAGATTTC	ACTACTGTTCGGCAGACGGT	GCGCTAACTCGACAGATTTC	ACTACTGTTCGGCAGACGGT	V1B
YPL209C	IPL1	3	D1.2	TTTACGAGCCGATCAGACGG	GCGAGGTGTCTCATCATTGT	TTTACGAGCCGATCAGACGG	GCGAGGTGTCTCATCATTGT	V1B
YNL097C	PHO23	3	D1.2	GCGGACTCGATATGTATAAG	ATTACGTTGCTCACGCCGGT	GCGGACTCGATATGTATAAG	ATTACGTTGCTCACGCCGGT	V1B
YER165W	PAB1	3	D1.2	ACTGATAGACGATTCGATGG	GCAGTCAAGACCAGCTCCTA	ACTGATAGACGATTCGATGG	GCAGTCAAGACCAGCTCCTA	V1B
YPL153C	RAD53	3	D1.2	ATATTGTTCGCACCTCGCGG	GGTCCCTTCGACTGACTTGT	ATATTGTTCGCACCTCGCGG	GGTCCCTTCGACTGACTTGT	V1B
YBL028C	#REF!	3	D1.2	GAGCTGAGCTAATAGCGAGC	GCTGTCTAGCAATCCTTCTA	GAGCTGAGCTAATAGCGAGC	GCTGTCTAGCAATCCTTCTA	V1B
YDL005C	MED2	3	D1.2	GGACTATTACCATCATCCAG	TGGAGCGTTCTACACTCGGT	GGACTATTACCATCATCCAG	TGGAGCGTTCTACACTCGGT	V1B
YER161C	SPT2	3	D1.2	TACACCACTTCATGTGAGGG	TTCGACGCGGCGATTCTTGT	TACACCACTTCATGTGAGGG	TTCGACGCGGCGATTCTTGT	V1B
YGL029W	CGR1	3	D1.2	AAGACTTCTCCAGTTTCGCT	TCCTACTGGGTGTCAGCGTT	AAGACTTCTCCAGTTTCGCT	TCCTACTGGGTGTCAGCGTT	V1B
YOR051C	ETT1	3	D1.2	GCTGTAAAGACAATGTGCCA	CCACTGCTAGAATAGTTGAC	GCTGTAAAGACAATGTGCCA	CCACTGCTAGAATAGTTGAC	V1B
YMR284W	YKU70	3	D1.2	TTATCTCGGGTCACAGGGCT	CAATGATGAGGCTCGGACTT	TTATCTCGGGTCACAGGGCT	CAATGATGAGGCTCGGACTT	V1B
YGR234W	YHB1	3	D1.2	TATCAGTGTATAGACGGGCT	ACCTTGCGGATAGGCTCGTT	TATCAGTGTATAGACGGGCT	ACCTTGCGGATAGGCTCGTT	V1B
YER129W	SAK1	3	D1.2	ATTCGCTCACGACGTAGGTG	CACTACGAGGGCATTTTGTG	ATTCGCTCACGACGTAGGTG	CACTACGAGGGCATTTTGTG	V1B
YLR226W	BUR2	3	D1.2	GAGTTGCTTACACGTCCTCT	TCGAGGCTGATATGGTACTT	GAGTTGCTTACACGTCCTCT	TCGAGGCTGATATGGTACTT	V1B
YDR167W	TAF10	3	D1.2	ATGGTCACCTCATTCAGCGG	ACATTGTGTGAATACCGGGA	ATGGTCACCTCATTCAGCGG	ACATTGTGTGAATACCGGGA	V1B
YLR071C	RGR1	3	D1.2	TCCTTTACGGAGGGCTAAGT	AATTCAACGGGAGGGACCTT	TCCTTTACGGAGGGCTAAGT	AATTCAACGGGAGGGACCTT	V1B
YGL092W	NUP145	3	D1.2	ACGAGCTGTCTAACGCGACG	AGATGATGCACACCATATCA	ACGAGCTGTCTAACGCGACG	AGATGATGCACACCATATCA	V1B
YDR310C	SUM1	3	D1.2	AGTTATACGGCACTAGCCTG	GCCGGATAGCTTTCTACATT	NA	NA	V1B
YJL052W	TDH1	3	D1.2	AAGCCACTGGAATGCCGATC	AGTACAGTGTTTGAACCCGG	AAGCCACTGGAATGCCGATC	AGTACAGTGTTTGAACCCGG	V1B
YKL025C	PAN3	3	D1.2	TATGGTAACGCACTTGGACG	TCTACGAGTCGGTCAGATGT	TATGGTAACGCACTTGGACG	TCTACGAGTCGGTCAGATGT	V1B
YDL188C	PPH22	3	D1.2	CTCCATAACCGATATTGGGC	CCCATTGTTTCAAGCATTGC	CTCCATAACCGATATTGGGC	CCCATTGTTTCAAGCATTGC	V1B
YMR318C	ADH6	3	D1.2	AAAGATACTCTCGCACAGTG	GGGACTATGTTGCATCCATT	AAAGATACTCTCGCACAGTG	GGGACTATGTTGCATCCATT	V1B
YNL063W	MTQ1	3	D1.2	TTAGTCTCACGATACTCAGG	TTAGATATGCGACTCGTCCT	TTAGTCTCACGATACTCAGG	TTAGATATGCGACTCGTCCT	V1B
YNL186W	UBP10	3	D1.2	GAGAATAGTTAATGCGACCG	CTCGGTAGTAGGATCTATGT	GAGAATAGTTAATGCGACCG	CTCGGTAGTAGGATCTATGT	V1B
YEL007W	MIT1	3	D1.2	ATACCAGTTTGCACAGGGTG	AGTGTCCGACTCCTGGCATT	ATACCAGTTTGCACAGGGTG	AGTGTCCGACTCCTGGCATT	V1B
YJL124C	LSM1	3	D1.2	AACACTGCTTAATTGGGCCG	ATGACTAGCGGCGATACTGT	AACACTGCTTAATTGGGCCG	ATGACTAGCGGCGATACTGT	V1B
YGL087C	MMS2	3	D1.2	TATGTCGCCGTCACTTGTGT	AGGACCCTCCGATTTGGCCT	TATGTCGCCGTCACTTGTGT	AGGACCCTCCGATTTGGCCT	V1B
YGL097W	SRM1	3	D1.2	AACGCTAGTTCAGGGTATCT	TCCGTAGGGTTCAGGAATTT	AACGCTAGTTCAGGGTATCT	TCCGTAGGGTTCAGGAATTT	V1B
YBL023C	MCM2	3	D1.2	AACTAGCGGGAAGCTCTTGC	ACATTGACGTAATCGGAGAG	AACTAGCGGGAAGCTCTTGC	ACATTGACGTAATCGGAGAG	V1B
YOR141C	ARP8	3	D1.2	TACGCTACCGGATCGGGATT	TGCCGACTGTACGCTATCTT	TACGCTACCGGATCGGGATT	TGCCGACTGTACGCTATCTT	V1B
YJR066W	TOR1	3	D1.2	AAGTACGTGTAATCCTCGCG	AGGAGTGCTTCCATTTCCCT	AAGTACGTGTAATCCTCGCG	AGGAGTGCTTCCATTTCCCT	V1B
YLR234W	TOP3	3	D1.2	CAGGGCGACGTATGTACTCT	CGGGACGTGTTCCATCATTT	CAGGGCGACGTATGTACTCT	CGGGACGTGTTCCATCATTT	V1B
YOL146W	PSF3	3	D1.2	GCCTAACGAAGATATGTGGA	CGGACAAGATTGCCCAACTA	GCCTAACGAAGATATGTGGA	CGGACAAGATTGCCCAACTA	V1B
YDR369C	XRS2	3	D1.2	CCGATCCTTATCATGCTAGT	ATATGGTCGGTCAGGCCCTT	CCGATCCTTATCATGCTAGT	ATATGGTCGGTCAGGCCCTT	V1B
YPL016W	SWI1	3	D1.2	GAGGATACGCTTCCAGCTCT	ACCTGGAGTGTAGTCGATTT	GAGGATACGCTTCCAGCTCT	ACCTGGAGTGTAGTCGATTT	V1B
YKL020C	SPT23	3	D1.2	AAGGCAGGGTTCACATTAGT	GAATGTAGTGTCAGTCCCTT	AAGGCAGGGTTCACATTAGT	GAATGTAGTGTCAGTCCCTT	V1B
YDR004W	RAD57	3	D1.2	AAAGCCACCTTCCAGATTGT	CCGTACCAGAAAGCTGTTAA	AAAGCCACCTTCCAGATTGT	CCGTACCAGAAAGCTGTTAA	V1B
YOR210W	RPB10	3	D1.2	CCATACTTCTTAATCCGAGG	CCAAAGTAAATAGCGGGTGT	CCATACTTCTTAATCCGAGG	CCAAAGTAAATAGCGGGTGT	V1B
YBR060C	ORC2	3	D1.2	CGCCATGCTTAATACTTACG	CATTATGGGCTAATGCTCCG	CGCCATGCTTAATACTTACG	CATTATGGGCTAATGCTCCG	V1B
YDR190C	RVB1	3	D1.2	GGAGTAGCCGTAACCCTTTC	ATAACTCCTGGGACGACGGT	GGAGTAGCCGTAACCCTTTC	ATAACTCCTGGGACGACGGT	V1B
YLR055C	SPT8	3	D1.2	CCATCGTTACCATTGGACGG	CACGTCATAGTGGTCATTGT	CCATCGTTACCATTGGACGG	CACGTCATAGTGGTCATTGT	V1B
YPR162C	ORC4	3	D1.2	TAACCACACGCATTGCTAAG	TTGATTTGCCCGACTCCGGT	TAACCACACGCATTGCTAAG	TTGATTTGCCCGACTCCGGT	V1B
YEL037C	RAD23	3	D1.2	AACGGGAGCTAATCGTCCAG	CTACGTGCTAGATGCTCGGT	AACGGGAGCTAATCGTCCAG	CTACGTGCTAGATGCTCGGT	V1B
YMR299C	DYN3	3	D1.2	TATCCTCACGGAGCTTAGGG	AGCGATAGTTGTCCAGTTGT	TATCCTCACGGAGCTTAGGG	AGCGATAGTTGTCCAGTTGT	V1B
YPL028W	ERG10	3	D1.2	AACCTCAGTTGGGCGAAGCT	TTAGGATGCGCCGCTCACTT	AACCTCAGTTGGGCGAAGCT	TTAGGATGCGCCGCTCACTT	V1B
YOR244W	ESA1	3	D1.2	CTTATGGAGCTTGCCAGGCT	TTGTATGCCCTCCGAGCGTT	CTTATGGAGCTTGCCAGGCT	TTGTATGCCCTCCGAGCGTT	V1B
YLR383W	SMC6	3	D1.2	TCATCTATGTCAGGTGGGCT	TACTCTTTGCGGAGGGACTT	NA	NA	V1B
YOL051W	GAL11	3	D1.2	CCGCCATAGTAATAGAGATC	TGACGCTCTACGATGCTGCT	CCGCCATAGTAATAGAGATC	TGACGCTCTACGATGCTGCT	V1B
YML023C	NSE5	3	D1.2	TAAATCTACGGTCATGGGCT	TATCGGTACTGAGAGTCGTT	TAAATCTACGGTCATGGGCT	TATCGGTACTGAGAGTCGTT	V1B
YGL071W	AFT1	3	D1.2	GGACTAGCTTCAGATGCTCT	GGAGCGTGACTATTGTACTT	GGACTAGCTTCAGATGCTCT	GGAGCGTGACTATTGTACTT	V1B
YJR009C	TDH2	3	D1.2	AGGTTACTTCAGCCCATGCT	ACACGCCTTGTCATTAGGTT	AGGTTACTTCAGCCCATGCT	ACACGCCTTGTCATTAGGTT	V1B
YFR031C	SMC2	3	D1.2	ATTGTTCACGGCCCGACAGT	AGTACGTTTCGATGGACCTT	ATTGTTCACGGCCCGACAGT	AGTACGTTTCGATGGACCTT	V1B
YOR144C	ELG1	3	D1.2	ATGAGATTCGCCCATCCTGG	AACTAGCGTGAAGGATGATC	ATGAGATTCGCCCATCCTGG	AACTAGCGTGAAGGATGATC	V1B
YHR089C	GAR1	3	D1.2	CAGATGAGGCAAGTGCATTA	GACCAATTCACACGTTGTCA	CAGATGAGGCAAGTGCATTA	GACCAATTCACACGTTGTCA	V1B
YML058W-A	HUG1	3	D1.2	TTAGGGCGTCCATCATCCTG	TGAACGGATCGTGGTACATT	TTAGGGCGTCCATCATCCTG	TGAACGGATCGTGGTACATT	V1B
YML032C	RAD52	3	D1.2	CTGATAAGGCTCGTGAAGTC	GTATTATTCACATCTCCCGG	CTGATAAGGCTCGTGAAGTC	GTATTATTCACATCTCCCGG	V1B
YOR368W	RAD17	3	D1.2	TAGTATCCTACACTCTGACG	AACTTGCACTGGAAAGATGT	TAGTATCCTACACTCTGACG	AACTTGCACTGGAAAGATGT	V1B
YCL010C	SGF29	3	D1.2	AGGATTATTCCACACCATGC	TACCCAGGACGGGAAGAATC	AGGATTATTCCACACCATGC	TACCCAGGACGGGAAGAATC	V1B
YML109W	ZDS2	3	D1.2	TACCTCGTAGCACTTGGGTG	CGTGATCCGATTGTGGCATT	TACCTCGTAGCACTTGGGTG	CGTGATCCGATTGTGGCATT	V1B
YML126C	ERG13	3	D1.2	ATTAGGTCCGACAGCCCTTG	ACGCCGTTACGTGTCTCATT	ATTAGGTCCGACAGCCCTTG	ACGCCGTTACGTGTCTCATT	V1B
YMR022W	UBC7	3	D1.2	TACTAGCCTGGAGCTTGTGT	AACGGCTACTTTCCATGCTT	TACTAGCCTGGAGCTTGTGT	AACGGCTACTTTCCATGCTT	V1B
YLR430W	SEN1	3	D1.2	TGTTCGATCACCGGCCTTTG	TCCGACCTTCGATCTGTGGT	TGTTCGATCACCGGCCTTTG	TCCGACCTTCGATCTGTGGT	V1B
YOR290C	SNF2	3	D1.2	AGTGCCATCGTATTCCACGT	ATGGTAGCTCGCCCACAGTT	NA	NA	V1B
YMR043W	MCM1	3	D1.2	GCAGGGACTTTAGACTGATT	GCGGCGTATATCCGTATCTT	GCAGGGACTTTAGACTGATT	GCGGCGTATATCCGTATCTT	V1B
YIL046W	MET30	3	D1.2	TTTACGGCGTGCAGACCTCT	ACTGGGAGATTGGCTCATTT	TTTACGGCGTGCAGACCTCT	ACTGGGAGATTGGCTCATTT	V1B
YNL251C	NRD1	3	D1.2	CACTAAGGACGAATTGTGGA	GATCCAAGCGTAGCCAACTA	CACTAAGGACGAATTGTGGA	GATCCAAGCGTAGCCAACTA	V1B
YBL058W	SHP1	3	D1.2	CGACGCTTGTCAGTTGCCTT	CGACATGAGTTTCCAGTCTT	CGACGCTTGTCAGTTGCCTT	CGACATGAGTTTCCAGTCTT	V1B
YAR007C	RFA1	3	D1.2	AATTACCCGGCAGGCATTGG	AAAGGTCAGTGCTCACCCGT	AATTACCCGGCAGGCATTGG	AAAGGTCAGTGCTCACCCGT	V1B
YHR156C	LIN1	3	D1.2	AACAGTTATGCAGTAGCTCT	TCGAGCGGCTTCACGGATTT	AACAGTTATGCAGTAGCTCT	TCGAGCGGCTTCACGGATTT	V1B
YOL149W	DCP1	3	D1.2	AGGACCGCTGTACGTTTCTT	GGACTCCGTCTAGCTGTCTT	AGGACCGCTGTACGTTTCTT	GGACTCCGTCTAGCTGTCTT	V1B
YKL018W	SWD2	3	D1.2	ACGCGAGTGTTCATCCGGTT	CACGTCGTTAAAGACCTGGA	ACGCGAGTGTTCATCCGGTT	CACGTCGTTAAAGACCTGGA	V1B
YLR274W	MCM5	3	D1.2	AACTACTCATCATACGGAGG	CAGCGTCTTAGATGATGTGT	AACTACTCATCATACGGAGG	CAGCGTCTTAGATGATGTGT	V1B
YML011C	RAD33	3	D1.2	CATCATGTGAAATCCGTGCA	ATGAGTAGCGCCTCCACAGT	CATCATGTGAAATCCGTGCA	ATGAGTAGCGCCTCCACAGT	V1B
YDR174W	HMO1	3	D1.2	CGCGTCAGTATAATAGGATC	TACAGTTGTCGAATGTGCTC	CGCGTCAGTATAATAGGATC	TACAGTTGTCGAATGTGCTC	V1B
YKR095W	MLP1	3	D1.2	TTTATGGTCCCAGCCTACGG	GATACTAGGGCCTCGATTGT	TTTATGGTCCCAGCCTACGG	GATACTAGGGCCTCGATTGT	V1B
YKL128C	PMU1	3	D1.2	TCCTAGTAACGAGCCGTAAG	CTTTAAGGTAGATGTCCGGT	TCCTAGTAACGAGCCGTAAG	CTTTAAGGTAGATGTCCGGT	V1B
YMR307W	GAS1	3	D1.2	AATTTGCACGCACGCAGCAG	GGAGCCCTTTCATTCTCGGT	AATTTGCACGCACGCAGCAG	GGAGCCCTTTCATTCTCGGT	V1B
YIL126W	STH1	3	D1.2	GCGCATCACTAAGTTTCATC	ATCGCGCAGGTCGGACATAT	GCGCATCACTAAGTTTCATC	ATCGCGCAGGTCGGACATAT	V1B
YCR092C	MSH3	3	D1.2	AGATTTACCTCCACGACGGG	GCAGGACTTTCGTTAGTTGT	AGATTTACCTCCACGACGGG	NA	V1B
YBL019W	APN2	3	D1.2	ATTATTCCGGGAGCGCAGCT	GGGATGGATCGTATTCACTT	ATTATTCCGGGAGCGCAGCT	GGGATGGATCGTATTCACTT	V1B
YLR032W	RAD5	3	D1.2	ACATGAGCCATAAGTGTCTC	CGCGCTTATGCGATATAGTT	ACATGAGCCATAAGTGTCTC	CGCGCTTATGCGATATAGTT	V1B
YMR112C	MED11	3	D1.2	GTAGGGTCGTCATCCTCTCT	GGAAGCGTGTTGCATTACTT	GTAGGGTCGTCATCCTCTCT	GGAAGCGTGTTGCATTACTT	V1B
YNL140C	#REF!	3	D1.2	TATCCTTACGGACGGGCAGT	GAGGCTGCTTCTCATACCTT	TATCCTTACGGACGGGCAGT	GAGGCTGCTTCTCATACCTT	V1B
YDR099W	BMH2	3	D1.2	TAGACGAGGCCACTTTCCTG	CCGGAGCCTATTGTTACATT	TAGACGAGGCCACTTTCCTG	CCGGAGCCTATTGTTACATT	V1B
YBR073W	RDH54	3	D1.2	CAGACTATGGAATTATCGGC	ATACTCGCGTCAGGGATGCT	CAGACTATGGAATTATCGGC	ATACTCGCGTCAGGGATGCT	V1B
YGR005C	TFG2	3	D1.2	ATTCCTTGGACATCGGAGTG	GTTATAGGACTGCCTCCATT	ATTCCTTGGACATCGGAGTG	GTTATAGGACTGCCTCCATT	V1B
YML028W	TSA1	3	D1.2	GCGTTAATAGCATTGTACCG	CTATCGGCGCGGCTGTATGT	GCGTTAATAGCATTGTACCG	CTATCGGCGCGGCTGTATGT	V1B
YGR204W	ADE3	3	D1.2	TAGCTTAGGACATCTTGCCG	TAGGAGTCCGCAGCTACTGT	TAGCTTAGGACATCTTGCCG	TAGGAGTCCGCAGCTACTGT	V1B
YDR096W	GIS1	3	D1.2	TCACCTGAGGCATGAGCTTG	TGGATGTACCTCCCGTCATT	TCACCTGAGGCATGAGCTTG	TGGATGTACCTCCCGTCATT	V1B
YDR334W	SWR1	3	D1.2	CCACGGCTGTCAGTTATTGT	AACTGTACCTGATGATGCTT	CCACGGCTGTCAGTTATTGT	AACTGTACCTGATGATGCTT	V1B
YAL005C	SSA1	3	D1.2	TATTGTCGTCCAGGCCGGAT	TGAGCTTCCTGAGTACCTGT	TATTGTCGTCCAGGCCGGAT	TGAGCTTCCTGAGTACCTGT	V1B
YOR230W	WTM1	3	D1.2	CATCGAAGGCTAGGTTATCT	CGGCGACGGTTTCATAATTT	CATCGAAGGCTAGGTTATCT	CGGCGACGGTTTCATAATTT	V1B
YJR084W	#REF!	3	D1.2	TCCACTGCGGCGACGTGATT	GGACGGCTATGATGTATCTT	TCCACTGCGGCGACGTGATT	GGACGGCTATGATGTATCTT	V1B
YMR121C	RPL15B	3	D1.2	AGATGGTCCGTCATACCTCT	ATCGACCCGTTGAGTTATTT	AGATGGTCCGTCATACCTCT	ATCGACCCGTTGAGTTATTT	V1B
YGL130W	CEG1	3	D1.2	GAAGTCCGTTGCACGTCTTT	TTATCTCGCGCCGGAGTCTT	NA	NA	V1B
YGR013W	SNU71	3	D1.2	ATTCTACTGGACCGCGTTGG	ATTTGATCTGACCGGCCCGT	ATTCTACTGGACCGCGTTGG	ATTTGATCTGACCGGCCCGT	V1B
YDL132W	CDC53	3	D1.2	TTTAGTGTGCGACCCGCTCT	AGGGACCCGTTACCGGATTT	TTTAGTGTGCGACCCGCTCT	AGGGACCCGTTACCGGATTT	V1B
YGR063C	SPT4	3	D1.2	AACCTACCGTGCGGAGAGTT	AGCTGGTAAGTCAGTGTCTT	AACCTACCGTGCGGAGAGTT	AGCTGGTAAGTCAGTGTCTT	V1B
YAL001C	TFC3	3	D1.2	AAGAGCCTCACAAGCGTGCA	CCCAGTCTCAAATGCGATAA	AAGAGCCTCACAAGCGTGCA	CCCAGTCTCAAATGCGATAA	V1B
YBR274W	CHK1	3	D1.2	GAGGGTAACTCCCACGTTTC	AAACCCGAGTGATCGACGGT	GAGGGTAACTCCCACGTTTC	AAACCCGAGTGATCGACGGT	V1B
YJL072C	PSF2	3	D1.2	TATAGATTCCTCTCAACCGG	AAGCCCTCTTCGATGATTGT	TATAGATTCCTCTCAACCGG	AAGCCCTCTTCGATGATTGT	V1B
YIL150C	MCM10	3	D1.2	CACACCGCAGCATGATTAAG	ACCTGTTGTGCAGTTCCGGT	CACACCGCAGCATGATTAAG	ACCTGTTGTGCAGTTCCGGT	V1B
YFL007W	BLM10	3	D1.2	TGCACTACTCCATGTATCGG	AGTCATCCTGTCAGCCTTGT	TGCACTACTCCATGTATCGG	AGTCATCCTGTCAGCCTTGT	V1B
YGR252W	GCN5	3	D1.2	ACACCGTGATAATCTAGCAG	ACGTACTATTTTCAGTCGGT	ACACCGTGATAATCTAGCAG	ACGTACTATTTTCAGTCGGT	V1B
YNL021W	HDA1	3	D1.2	TTATAGTTCCGCACACCGGG	ACTATCTCGTGAGGAGTTGT	TTATAGTTCCGCACACCGGG	ACTATCTCGTGAGGAGTTGT	V1B
YHR164C	DNA2	3	D1.2	AATAGGCTTGCCACCGAGCT	ATCGACCGCTGATTTCACTT	AATAGGCTTGCCACCGAGCT	ATCGACCGCTGATTTCACTT	V1B
YMR229C	RRP5	3	D1.2	ATTCATCTGGAGTGCAGGCT	ACTATCTGGTATCAGGCGTT	ATTCATCTGGAGTGCAGGCT	ACTATCTGGTATCAGGCGTT	V1B
YHR119W	SET1	3	D1.2	GCCTTCCTATGCAATGTAAC	CAGTAAGTATAACGAGCTGC	GCCTTCCTATGCAATGTAAC	CAGTAAGTATAACGAGCTGC	V1B
YGR061C	ADE6	3	D1.2	AACTCAGGGTCACCGATGCT	ATTCAGCCGTCCGATGACTT	AACTCAGGGTCACCGATGCT	ATTCAGCCGTCCGATGACTT	V1B
YGL240W	DOC1	3	D1.2	ACACGCTGTGAACTTGTCTC	CAGTCTGCGATACGCTAGTT	ACACGCTGTGAACTTGTCTC	CAGTCTGCGATACGCTAGTT	V1B
YER035W	EDC2	3	D1.2	CCTTATGGTAGATGATGGCT	CGGATGACCTGATCGTCGTT	CCTTATGGTAGATGATGGCT	CGGATGACCTGATCGTCGTT	V1B
YML060W	OGG1	3	D1.2	TGAGTACATAGACAGCACCC	TAACTGGAACGAGCTGTGCC	TGAGTACATAGACAGCACCC	TAACTGGAACGAGCTGTGCC	V1B
YML021C	UNG1	3	D1.2	CCGATGGCTGCATATAGTCT	TATTCGGCGCGAGGTTACTT	CCGATGGCTGCATATAGTCT	TATTCGGCGCGAGGTTACTT	V1B
YIL026C	IRR1	3	D1.2	TCGCGGCAGCAAGAACTAGA	ATGGCTCGCACCTGAGTCTA	TCGCGGCAGCAAGAACTAGA	ATGGCTCGCACCTGAGTCTA	V1B
YJL168C	SET2	3	D1.2	AGCCCGATGGACTAGATGCT	ATTTAGTCGCCCGGACGGTT	AGCCCGATGGACTAGATGCT	ATTTAGTCGCCCGGACGGTT	V1B
YHR216W	IMD2	3	D1.2	CAGCCGGATCTATATTCAGT	AGCCTATGCCTAGATACCTT	CAGCCGGATCTATATTCAGT	AGCCTATGCCTAGATACCTT	V1B
YDR076W	RAD55	3	D1.2	ATCTGTGCGCCAGTATCGCT	TAAACATAGCGCCAGGACGG	ATCTGTGCGCCAGTATCGCT	TAAACATAGCGCCAGGACGG	V1B
YMR080C	NAM7	3	D1.2	GCGCTTACCATAGATATACG	CCCTGAGTAGTGATAGATGT	GCGCTTACCATAGATATACG	CCCTGAGTAGTGATAGATGT	V1B
YNL178W	RPS3	3	D1.2	TTCCGGTCTACACGCTAGTG	AGGATCTACGTCTCTCCATT	TTCCGGTCTACACGCTAGTG	AGGATCTACGTCTCTCCATT	V1B
YDR397C	NCB2	3	D1.2	TAGAGGCCAGCAGTTTACCG	AATCCTGGGTCAGTGTATGT	TAGAGGCCAGCAGTTTACCG	AATCCTGGGTCAGTGTATGT	V1B
YNL135C	FPR1	3	D1.2	TACCTAGCCGCATGACTGTG	AAACGCAGAGGCCGTGCATT	TACCTAGCCGCATGACTGTG	AAACGCAGAGGCCGTGCATT	V1B
YOR217W	RFC1	3	D1.2	AGGCACTATACATTTAACGC	AGACTCGTATAACTCTCGTC	AGGCACTATACATTTAACGC	AGACTCGTATAACTCTCGTC	V1B
YLR288C	MEC3	3	D1.2	GATTGCATTCCACCTGCTTG	CGATCAACGCTGTCGTCATT	GATTGCATTCCACCTGCTTG	CGATCAACGCTGTCGTCATT	V1B
YLL024C	SSA2	3	D1.2	GATCTATTGTCACCCGTTGT	CTGATATGAGGATGCTGCTT	GATCTATTGTCACCCGTTGT	CTGATATGAGGATGCTGCTT	V1B
YGL194C	HOS2	3	D1.2	CACGAGCGGTCATGTTATCT	TGGAACCCGTGTTTACATTT	CACGAGCGGTCATGTTATCT	TGGAACCCGTGTTTACATTT	V1B
YHR064C	SSZ1	3	D1.2	CACTGACGGTAGGCGATATT	AATGGGCACGGGATTATCTT	CACTGACGGTAGGCGATATT	AATGGGCACGGGATTATCTT	V1B
YOR123C	LEO1	3	D1.2	AGGGTCCTACGAGTACCTCT	CGGACGGGTATATGTCATTT	AGGGTCCTACGAGTACCTCT	CGGACGGGTATATGTCATTT	V1B
YML080W	DUS1	3	D1.2	TTAACGCGGATGCAGAGCTT	GGCGTATAGGTCATAGTCTT	TTAACGCGGATGCAGAGCTT	GGCGTATAGGTCATAGTCTT	V1B
YLR151C	PCD1	3	D1.2	ACTACGGTTACAGGAGTATG	AATTTGGGCTCATCCGCCGA	ACTACGGTTACAGGAGTATG	AATTTGGGCTCATCCGCCGA	V1B
YLR319C	BUD6	3	D1.2	GACCTATGAGTCGAGGCTCT	CCTTCGATTGGACGGGATTT	GACCTATGAGTCGAGGCTCT	CCTTCGATTGGACGGGATTT	V1B
YNL016W	PUB1	3	D1.2	GAGGTCTGTCCACCTCTGCT	GAGTGCTGAACATTTCTGGT	GAGGTCTGTCCACCTCTGCT	GAGTGCTGAACATTTCTGGT	V1B
YDL111C	RRP42	3	D1.2	CCCTTGTACTGAGGTGAGTT	GGTACGCGGATACTTGTCTT	CCCTTGTACTGAGGTGAGTT	GGTACGCGGATACTTGTCTT	V1B
YOR303W	CPA1	3	D1.2	ACCTATTTGATGAGGCGGTT	CATTCAAGGAACCCGGTGGA	ACCTATTTGATGAGGCGGTT	CATTCAAGGAACCCGGTGGA	V1B
YPL127C	HHO1	3	D1.2	ACATTAGAGTCACGTTGAGG	TGGGACTGTCTCCACTGTGT	ACATTAGAGTCACGTTGAGG	TGGGACTGTCTCCACTGTGT	V1B
YCR012W	PGK1	3	D1.2	AGTACCCAGTAACCTGTTTC	TCTTCTACACGACTGACGGT	AGTACCCAGTAACCTGTTTC	TCTTCTACACGACTGACGGT	V1B
YKL054C	DEF1	3	D1.2	TCGCCCACTACAATGAGAGA	CAGCCGGTTAGATATGATTG	TCGCCCACTACAATGAGAGA	CAGCCGGTTAGATATGATTG	V1B
YPR023C	EAF3	3	D1.2	AAACTGTCTGTAAGGACCGG	CAGCGACCTCGGACTATTGT	AAACTGTCTGTAAGGACCGG	CAGCGACCTCGGACTATTGT	V1B
YAL012W	CYS3	3	D1.2	ATGATAGATCCGCCCAACAG	TTTGCTCAGGTTCCAGCGGT	ATGATAGATCCGCCCAACAG	TTTGCTCAGGTTCCAGCGGT	V1B
YOR156C	NFI1	3	D1.2	CTGAAGGGGCAATTTCGAGA	TGCAGATCATCCCAGACGAG	CTGAAGGGGCAATTTCGAGA	TGCAGATCATCCCAGACGAG	V1B
YDR311W	TFB1	3	D1.2	ATAGTTGTCCCACCGCTCGG	ACTCTTGGGAGACGCCTTGT	NA	NA	V1B
YLR085C	ARP6	3	D1.2	CCTGACATATAATGGCGCAG	ATCTATGGCGGATATTCGGT	CCTGACATATAATGGCGCAG	ATCTATGGCGGATATTCGGT	V1B
YDR291W	HRQ1	3	D1.2	CATGATATTGAAGCCGTCTC	GGATTGCATCTATCGTCAGT	CATGATATTGAAGCCGTCTC	GGATTGCATCTATCGTCAGT	V1B
YDR158W	HOM2	3	D1.2	TATCGGCATCCATATCCGGG	TCACGCTTGAGAGTAGTTGT	TATCGGCATCCATATCCGGG	TCACGCTTGAGAGTAGTTGT	V1B
YDR121W	DPB4	3	D1.2	ATTTGTGACGACGCTGAGCT	TTATGGTCGCCGCCAGACTT	ATTTGTGACGACGCTGAGCT	TTATGGTCGCCGCCAGACTT	V1B
YPR031W	NTO1	3	D1.2	ATTCACTGCGTCCAGAGGCT	GGTTATATGATACCGGCGTT	ATTCACTGCGTCCAGAGGCT	GGTTATATGATACCGGCGTT	V1B
YJL092W	SRS2	3	D1.2	GGATATTACTTCACCCTGCT	GACTCTAGCTTACCTGACTT	GGATATTACTTCACCCTGCT	GACTCTAGCTTACCTGACTT	V1B
YMR179W	SPT21	3	D1.2	GCCACGACAGTCGTATCAAG	TGCCTACGCAAAGCGAGCAA	GCCACGACAGTCGTATCAAG	TGCCTACGCAAAGCGAGCAA	V1B
YIL053W	RHR2	3	D1.2	TATTCGGCTGGACACTGGCT	CACCGCGTGTGTCATTCGTT	TATTCGGCTGGACACTGGCT	CACCGCGTGTGTCATTCGTT	V1B
YOR271C	FSF1	3	D1.2	ATAGGCGTTCCAGTCCGTCT	GGGTATAGCCTCCGAACCTT	ATAGGCGTTCCAGTCCGTCT	GGGTATAGCCTCCGAACCTT	V1B
YDR325W	YCG1	3	D1.2	TGTATCAGGCCCTCGATGCT	ATCTTCGTGAGGATACGGTT	TGTATCAGGCCCTCGATGCT	ATCTTCGTGAGGATACGGTT	V1B
YPL011C	TAF3	3	D1.2	ACCGGCGTATGATATAGAGT	GACGGCTGGTCATATACCTT	ACCGGCGTATGATATAGAGT	GACGGCTGGTCATATACCTT	V1B
YMR228W	MTF1	3	D1.2	GCCGCTAGTACAAGATTAGA	ATTAGACTTAGCCACTACGG	GCCGCTAGTACAAGATTAGA	ATTAGACTTAGCCACTACGG	V1B
YNL123W	NMA111	3	D1.2	CCTTTCGAGCAACCTTGATA	CCAGGTGTAGAATAGTGTAC	CCTTTCGAGCAACCTTGATA	CCAGGTGTAGAATAGTGTAC	V1B
YPR104C	FHL1	3	D1.2	ATTTATGTGCCATCCCGCTG	ATTAGGGAGCTTGGACCATT	ATTTATGTGCCATCCCGCTG	ATTAGGGAGCTTGGACCATT	V1B
YDL059C	RAD59	3	D1.2	CGCTCACTATGATCGACTAT	TATCATGCCGCAGGCGTATG	CGCTCACTATGATCGACTAT	TATCATGCCGCAGGCGTATG	V1B
YDR439W	LRS4	3	D1.2	AGATGTCATACACTCCTACG	CTTTCGATCTGGGACGATGT	AGATGTCATACACTCCTACG	CTTTCGATCTGGGACGATGT	V1B
YER133W	GLC7	3	D1.2	GGATACCATACACATTGGAC	TTGAAGACATCCTACGAACC	NA	NA	V1B
YJR104C	SOD1	3	D1.2	CTCAGGGATCAGATTTAGTG	TGATTACGGCGGCCAGCATT	CTCAGGGATCAGATTTAGTG	TGATTACGGCGGCCAGCATT	V1B
YMR075W	RCO1	3	D1.2	ATTAGTTAGGCCACGACCCG	GCGCGGTACTGATATTATGT	ATTAGTTAGGCCACGACCCG	GCGCGGTACTGATATTATGT	V1B
YML027W	YOX1	3	D1.2	GGTCACCCTAGACTTCTGTG	GGCGCGTCGATTCTTGCATT	GGTCACCCTAGACTTCTGTG	GGCGCGTCGATTCTTGCATT	V1B
YPR056W	TFB4	3	D1.2	ATAGTGGTCCCATGACTCCG	ACTGCAACGCGAGGTACTGT	ATAGTGGTCCCATGACTCCG	ACTGCAACGCGAGGTACTGT	V1B
YOL043C	NTG2	3	D1.2	GTTAGACGGATCACTTCTTG	GCGATACCGCTCTGGTCATT	GTTAGACGGATCACTTCTTG	GCGATACCGCTCTGGTCATT	V1B
YDL108W	KIN28	3	D1.2	CCCGAGGGTTCCATTGTTGT	ATGTTGCGCCGACCTTGCTT	CCCGAGGGTTCCATTGTTGT	ATGTTGCGCCGACCTTGCTT	V1B
YLR399C	BDF1	3	D1.2	AGACCCGACGCATTGTTACG	AAGACGGTATCACGGCCCAT	AGACCCGACGCATTGTTACG	AAGACGGTATCACGGCCCAT	V1B
YMR186W	HSC82	3	D1.2	AGATAGGTGCCTTCCACTCT	AGGATGCGCTTGCACCATTT	AGATAGGTGCCTTCCACTCT	AGGATGCGCTTGCACCATTT	V1B
YBR258C	SHG1	3	D1.2	ACTCGTAGGCGACGGCTATT	ACGTTCGGGCGATGACTCTT	ACTCGTAGGCGACGGCTATT	ACGTTCGGGCGATGACTCTT	V1B
YBR119W	MUD1	3	D1.2	GAGCGGTCACTATTACCTCT	GCGACGCCTACTATTCATTT	GAGCGGTCACTATTACCTCT	GCGACGCCTACTATTCATTT	V1B
YNL004W	HRB1	3	D1.2	AAGACCTTACCAATCGGTGA	CAGAGCTATAAACTCGGTCC	AAGACCTTACCAATCGGTGA	CAGAGCTATAAACTCGGTCC	V1B
YGR270W	YTA7	3	D1.2	TAGAAGTTCCGATCCCGCTT	CGCAGGCGTCGATTAGTCTT	TAGAAGTTCCGATCCCGCTT	CGCAGGCGTCGATTAGTCTT	V1B
YGL175C	SAE2	3	D1.2	CCGTATGGGCGATTCTAGTT	GAGTACGCCGTTCACTTCTT	CCGTATGGGCGATTCTAGTT	GAGTACGCCGTTCACTTCTT	V1B
YPL228W	CET1	3	D1.2	ATTGGGCCGCTACGCCTATT	CCGAGTAGGAAACCTTAGCA	ATTGGGCCGCTACGCCTATT	CCGAGTAGGAAACCTTAGCA	V1B
YFL024C	EPL1	3	D1.2	AGACCTTACTGTCATCGGTT	CGTTAAGTCCAAGGAAGTGA	AGACCTTACTGTCATCGGTT	CGTTAAGTCCAAGGAAGTGA	V1B
YLR455W	#REF!	3	D1.2	ATAGTACAGGTCACGATAGG	TAGTTAGCTAGACCCTGTGT	ATAGTACAGGTCACGATAGG	TAGTTAGCTAGACCCTGTGT	V1B
YMR048W	CSM3	3	D1.2	CGCAGCCATTAGTATCAAAG	TACTAAGGTCGATTGACGGT	CGCAGCCATTAGTATCAAAG	TACTAAGGTCGATTGACGGT	V1B
YPL029W	SUV3	3	D1.2	GATGCTATTACAGTACCCGG	CGATCCCTTAGACCTATTGT	NA	NA	V1B
YDL003W	MCD1	3	D1.2	GATGCCATTACAGTACCCGG	CGATCCCTTAGACCTATTGT	NA	NA	V1B
YLL002W	RTT109	3	D1.2	GACGAGAGATTCTACCACAG	CGTAACTATGGCTCAGCGGT	GACGAGAGATTCTACCACAG	CGTAACTATGGCTCAGCGGT	V1B
YBR239C	ERT1	3	D1.2	ATATGCTAGTACACGGTCGG	ACCACGTAGTTCATCCTTGT	NA	NA	V1B
YDR499W	LCD1	3	D1.2	CATATACTATCACGCAGACG	GCCTATCAGCCAAGTCTATA	CATATACTATCACGCAGACG	GCCTATCAGCCAAGTCTATA	V1B
YFR036W	CDC26	3	D1.2	TTATTGGGCCTCACGTCGCT	TCAGCGTGTAGACTGCCGTT	TTATTGGGCCTCACGTCGCT	TCAGCGTGTAGACTGCCGTT	V1B
YMR078C	CTF18	3	D1.2	ATATGATTTACCAGCGCGGG	GCTCGGCGATTATACGTTGT	ATATGATTTACCAGCGCGGG	GCTCGGCGATTATACGTTGT	V1B
YMR125W	STO1	3	D1.2	TGACGCTTACTCATCTAGCT	CTTTCAGTGCGCCGAGACTT	TGACGCTTACTCATCTAGCT	CTTTCAGTGCGCCGAGACTT	V1B
YPR045C	THP3	3	D1.2	GCACGTCAGCAACGCAGATA	GATGCGTCACCATGCTACAG	GCACGTCAGCAACGCAGATA	GATGCGTCACCATGCTACAG	V1B
YLR442C	SIR3	3	D1.2	GCACGTCTGGCATTTCTGCT	AACGGATGTTGCAGTGACTT	GCACGTCTGGCATTTCTGCT	AACGGATGTTGCAGTGACTT	V1B
YDR240C	SNU56	3	D1.2	TTCAGGTCCCTAGACTGGCT	CATTTGACGTGGCCCAGGTT	TTCAGGTCCCTAGACTGGCT	CATTTGACGTGGCCCAGGTT	V1B
YOR352W	TFB6	3	D1.2	ATTGTCATCCGACGCGGTCT	AGGGTTCACTGTGCCACCTT	ATTGTCATCCGACGCGGTCT	AGGGTTCACTGTGCCACCTT	V1B
YMR173W	DDR48	3	D1.2	TCGAGCCGTAGATTGATGCT	CCTTAGGTTAGAGTACGGTT	TCGAGCCGTAGATTGATGCT	CCTTAGGTTAGAGTACGGTT	V1B
YKL017C	HCS1	3	D1.2	TATGGATTGGCACTTCGAGT	GGATTGACCCTATCTACCTT	TATGGATTGGCACTTCGAGT	GGATTGACCCTATCTACCTT	V1B
YDR392W	SPT3	3	D1.2	TTTAGCCCGATAGCTCGCTG	TATGTGTCACGCGGCCCATT	TTTAGCCCGATAGCTCGCTG	TATGTGTCACGCGGCCCATT	V1B
YLR357W	RSC2	3	D1.2	GACACCTACTTAATACGCAG	CATACTTCGACAGATCCGAG	GACACCTACTTAATACGCAG	CATACTTCGACAGATCCGAG	V1B
YGL014W	PUF4	3	D1.2	ACACGCGAATAAGTCTTGAC	GCGACAGCATGATGAACACC	ACACGCGAATAAGTCTTGAC	GCGACAGCATGATGAACACC	V1B
YMR137C	PSO2	3	D1.2	ATACGTCGGTAACTAGCCCG	CCTGCGGGACGACTTTATGT	ATACGTCGGTAACTAGCCCG	CCTGCGGGACGACTTTATGT	V1B
YBL024W	NCL1	3	D1.2	ATACCTTATGCACGGGTGTG	CAAACGAGAGTGGTTGCATT	ATACCTTATGCACGGGTGTG	CAAACGAGAGTGGTTGCATT	V1B
YOR224C	RPB8	3	D1.2	AATAGGCAGGGACATCTCCG	ACCGTATCCTCATGTACTGT	AATAGGCAGGGACATCTCCG	ACCGTATCCTCATGTACTGT	V1B
YLR385C	SWC7	3	D1.2	CGGACTCTTATCCATGATCT	ACCCTGTTCGGACGGTTGTT	CGGACTCTTATCCATGATCT	ACCCTGTTCGGACGGTTGTT	V1B
YER147C	SCC4	3	D1.2	TTAGCCCGGCGACTGTTTGT	CTAGACCTGCCGATTTGCTT	TTAGCCCGGCGACTGTTTGT	CTAGACCTGCCGATTTGCTT	V1B
YNL309W	STB1	3	D1.2	AAGTTAATGGCACCGCACCG	AAAGAACTTCCAGTGCCGAT	AAGTTAATGGCACCGCACCG	AAAGAACTTCCAGTGCCGAT	V1B
YBR103W	SIF2	3	D1.2	GGAGAAGGTTGCATCACTCT	TAGTGGGCCTCCGACCATTT	GGAGAAGGTTGCATCACTCT	TAGTGGGCCTCCGACCATTT	V1B
YHR087W	RTC3	3	D1.2	TGTGACGAGATCCGCGTATT	AGTGACTACCTCGTACTCTT	TGTGACGAGATCCGCGTATT	AGTGACTACCTCGTACTCTT	V1B
YOL054W	PSH1	3	D1.2	TGGGATGTGCTTCACCCTCT	AATGAGCGGTTCGCAGATTT	TGGGATGTGCTTCACCCTCT	AATGAGCGGTTCGCAGATTT	V1B
YCR077C	PAT1	3	D1.2	CCTACAGCAACGCGAATTGA	CAGATCCAAACACATCGTGG	CCTACAGCAACGCGAATTGA	CAGATCCAAACACATCGTGG	V1B
YDR463W	STP1	3	D1.2	TCTACTTGGCGGACAGGCTT	GACTACCTTCGATACGTCTT	TCTACTTGGCGGACAGGCTT	GACTACCTTCGATACGTCTT	V1B
YOR023C	AHC1	3	D1.2	GCAGCTACACTACTTTCAAG	AGCCTCTACTCATATACGGT	GCAGCTACACTACTTTCAAG	AGCCTCTACTCATATACGGT	V1B
YML114C	TAF8	3	D1.2	GCTAGTACAGTATGAGACAG	TCTACCTTGGTCAGAGCGGT	GCTAGTACAGTATGAGACAG	TCTACCTTGGTCAGAGCGGT	V1B
YDR145W	TAF12	3	D1.2	CACACGCACGAATTTGCATA	CAGATAGTTTGAGACACTCG	CACACGCACGAATTTGCATA	CAGATAGTTTGAGACACTCG	V1B
YKR038C	KAE1	3	D1.2	GGCACTCATCCAGTATTCGG	GACGGCTTCTCAGTCCTTGT	GGCACTCATCCAGTATTCGG	GACGGCTTCTCAGTCCTTGT	V1B
YDL064W	UBC9	3	D1.2	ATACGTGACTAAGCGTGCAG	ATTGTCTGCGACCTCAGGGT	ATACGTGACTAAGCGTGCAG	ATTGTCTGCGACCTCAGGGT	V1B
YLR275W	SMD2	3	D1.2	ATTTGTCGCCTCAGGTCGCT	AATGGAGCCTGAGATCCGTT	ATTTGTCGCCTCAGGTCGCT	AATGGAGCCTGAGATCCGTT	V1B
YGL151W	NUT1	3	D1.2	TTTGTACTGACCGGCACGCT	ATGCACGGGATCTGAGACTT	TTTGTACTGACCGGCACGCT	ATGCACGGGATCTGAGACTT	V1B
YBL097W	BRN1	3	D1.2	ATGACCGTCTTCCATAGGCT	TAGCCCTGACTCGGATCGTT	ATGACCGTCTTCCATAGGCT	TAGCCCTGACTCGGATCGTT	V1B
YER177W	BMH1	3	D1.2	GATATACAGCCACAGCAGGC	TCGGTGATGCGAGCGTTCTT	GATATACAGCCACAGCAGGC	TCGGTGATGCGAGCGTTCTT	V1B
YOL017W	ESC8	3	D1.2	AATGGTTAGGCATCTGTGCT	GCTAGACGGCTCCGATACTT	AATGGTTAGGCATCTGTGCT	GCTAGACGGCTCCGATACTT	V1B
YMR072W	ABF2	3	D1.2	ATATGGACACGCGCCTCAAG	GCCTATGCCAAATCTAGCAA	ATATGGACACGCGCCTCAAG	GCCTATGCCAAATCTAGCAA	V1B
YPL260W	#REF!	3	D1.2	ATCACTATGTAGAGGTGGTT	TTTACTAGCCGCCGCAGGTT	ATCACTATGTAGAGGTGGTT	TTTACTAGCCGCCGCAGGTT	V1B
YNL236W	SIN4	3	D1.2	TGAGTCGTTCCACGCCGTCT	AATGGAGGCTGTCGCACCTT	TGAGTCGTTCCACGCCGTCT	AATGGAGGCTGTCGCACCTT	V1B
YER051W	JHD1	3	D1.2	CCTGTGAGAGAAGCAGACAC	CTGATGCGACTCCTAGACTT	CCTGTGAGAGAAGCAGACAC	CTGATGCGACTCCTAGACTT	V1B
YDR314C	RAD34	3	D1.2	TCAGATCCCGTGGCATGAGT	CGAGTGCTACGGAGTACCTT	TCAGATCCCGTGGCATGAGT	CGAGTGCTACGGAGTACCTT	V1B
YPL190C	NAB3	3	D1.2	CAGTACAGCTCATATTCTCG	AAGTCGTGCGAATCTTCTGC	CAGTACAGCTCATATTCTCG	AAGTCGTGCGAATCTTCTGC	V1B
YLR183C	TOS4	1	D1.1	GGGCTAAGTATAATCTATGC	TGTTATACACGCCCAGATCA	GGGCTAAGTATAATCTATGC	TGTTATACACGCCCAGATCA	V1A
YBR289W	SNF5	1	D1.1	TACTGGATCGCATCGTAGTG	TCTCAGGCTGCATTAGCGTG	TACTGGATCGCATCGTAGTG	TCTCAGGCTGCATTAGCGTG	V1A
YNL255C	GIS2	1	D1.1	GCACGAGTTAGAACACGGAC	TGAACCACAGTGTTGAAACC	GCACGAGTTAGAACACGGAC	TGAACCACAGTGTTGAAACC	V1A
YLR403W	SFP1	1	D1.1	TGAACGGACCTGAATCCTGC	GTTAGAGCACCGGACACATC	TGAACGGACCTGAATCCTGC	GTTAGAGCACCGGACACATC	V1A
YGR263C	SAY1	1	D1.1	TAAGTCGAGATAATCGCTCC	TTGTTGCCACGCTATCCAGG	TAAGTCGAGATAATCGCTCC	TTGTTGCCACGCTATCCAGG	V1A
YKL211C	TRP3	1	D1.1	TACTCTTGAGCACGGGGCTG	TATGTTTCCACCTGACACTG	TACTCTTGAGCACGGGGCTG	TATGTTTCCACCTGACACTG	V1A
YGL043W	DST1	1	D1.1	ATTATCATCCGCCAGACGGG	ACTATTCTTAGAGGAGCTGG	ATTATCATCCGCCAGACGGG	ACTATTCTTAGAGGAGCTGG	V1A
YGL234W	ADE5,7	1	D1.1	GTCCGCAGGATGAACTATAC	GCTACTTTAGAAGACTCACC	GTCCGCAGGATGAACTATAC	GCTACTTTAGAAGACTCACC	V1A
YNL230C	ELA1	1	D1.1	CAGGCGTCAGTAGTATTCAT	GCGCTAATATCACATAGCCC	CAGGCGTCAGTAGTATTCAT	GCGCTAATATCACATAGCCC	V1A
YGL054C	ERV14	1	D1.1	CCGACCAGAGTTAGTAATTC	CCGAGCTGACTAACGATTTC	CCGACCAGAGTTAGTAATTC	CCGAGCTGACTAACGATTTC	V1A
YNL062C	GCD10	1	D1.1	CCATGTGTTTAAGCTGAGTG	ATACTGGCAGAAGTCCGCAC	CCATGTGTTTAAGCTGAGTG	ATACTGGCAGAAGTCCGCAC	V1A
YMR225C	MRPL44	1	D1.1	TACGAATAAACAGGTGTGCG	ATAGACTGCTACCAGCGTCG	TACGAATAAACAGGTGTGCG	ATAGACTGCTACCAGCGTCG	V1A
YGR080W	TWF1	1	D1.1	AGGTCCTCCACATTTGATTC	TAGAGCGTAAGAGCTGTTTC	AGGTCCTCCACATTTGATTC	TAGAGCGTAAGAGCTGTTTC	V1A
YOR093C	#REF!	1	D1.1	CCCGCTAATCTTGTAGAATC	CACTACTATGTGGTAAGAGG	CCCGCTAATCTTGTAGAATC	CACTACTATGTGGTAAGAGG	V1A
YBL086C	#REF!	1	D1.1	TACGAACACCGTCGCAATTA	GGCGGCTAGAGAACCATAAC	TACGAACACCGTCGCAATTA	GGCGGCTAGAGAACCATAAC	V1A
YHR132W-A	IGO2	1	D1.1	GCGCATTAAGTCCATTGAAG	AAGCTACCAGCCCATTACAG	GCGCATTAAGTCCATTGAAG	AAGCTACCAGCCCATTACAG	V1A
YDL133C-A	RPL41B	1	D1.1	ACCCTAGCGGCTTGATGTGC	ATTATTGAGCCCGCGCTGTG	ACCCTAGCGGCTTGATGTGC	ATTATTGAGCCCGCGCTGTG	V1A
YOR101W	RAS1	1	D1.1	GCGGTCAGATTTCAGGCAAA	GTCACTCGTGTCCAGGATGT	GCGGTCAGATTTCAGGCAAA	GTCACTCGTGTCCAGGATGT	V1A
YNL207W	RIO2	1	D1.1	CCATGCGATGAAGCTGTTGC	GCCTGATGCACAATAGACCA	NA	NA	V1A
YNL055C	POR1	1	D1.1	TGAGGAACACGGTGCAATAC	AGATGTACGTCAATTCCACC	TGAGGAACACGGTGCAATAC	AGATGTACGTCAATTCCACC	V1A
YPL208W	RKM1	1	D1.1	GGAGTCCATCCATAGCAGTC	GAGTTTCACGCATGACTATG	GGAGTCCATCCATAGCAGTC	GAGTTTCACGCATGACTATG	V1A
YML092C	PRE8	1	D1.1	ACACTTCCTGAACATTGGGC	AATACGAGCTAAGTGGCCAG	ACACTTCCTGAACATTGGGC	AATACGAGCTAAGTGGCCAG	V1A
YKL127W	PGM1	1	D1.1	GCCTGATGATTAGTGACTCT	CCCGCATCAATGAAATGGCA	GCCTGATGATTAGTGACTCT	CCCGCATCAATGAAATGGCA	V1A
YOR185C	GSP2	1	D1.1	CGAAGCTCGTTTAATCGGTG	ATTTCTCAGACCCGCGTGTG	CGAAGCTCGTTTAATCGGTG	ATTTCTCAGACCCGCGTGTG	V1A
YGR178C	PBP1	1	D1.1	GCGCATAGACGAGCATAAGC	AGTCGCGCTGTCCATTTGCT	GCGCATAGACGAGCATAAGC	AGTCGCGCTGTCCATTTGCT	V1A
YLR301W	HRI1	1	D1.1	CGGAATCTATTTCAATGCGC	CATAGATGCTGAGCTGCTGT	CGGAATCTATTTCAATGCGC	CATAGATGCTGAGCTGCTGT	V1A
YGL211W	NCS6	1	D1.1	ATCATCCGGTCATGCCGAGT	ATGGCTCCAGTTCCAGCTTG	ATCATCCGGTCATGCCGAGT	ATGGCTCCAGTTCCAGCTTG	V1A
YMR314W	PRE5	1	D1.1	GAAGCACTTTCAAGCCGAGC	GATCACCAAAGAAGCGTCGC	GAAGCACTTTCAAGCCGAGC	GATCACCAAAGAAGCGTCGC	V1A
YGL169W	SUA5	1	D1.1	CTCTAATCGGCAGTCAGGTG	AGACCCATGTTCGGCAATGC	CTCTAATCGGCAGTCAGGTG	AGACCCATGTTCGGCAATGC	V1A
YDR354W	TRP4	1	D1.1	AAGCGGACTGAACTTTCTGC	ACCTGTAGAGTAAGTGTCAG	AAGCGGACTGAACTTTCTGC	ACCTGTAGAGTAAGTGTCAG	V1A
YER110C	KAP123	1	D1.1	CATCAGTCTGGATAAGCTAG	CCTCGTAATCTAGCTTAACG	CATCAGTCTGGATAAGCTAG	CCTCGTAATCTAGCTTAACG	V1A
YBR212W	NGR1	1	D1.1	CACTTGTAGCCAGGTATCGG	CCTTCGTTAAGATGTATGGG	CACTTGTAGCCAGGTATCGG	CCTTCGTTAAGATGTATGGG	V1A
YMR276W	DSK2	1	D1.1	GGAACTCTCTTCCATATGGC	CCCTAATGATACAGACTTGC	GGAACTCTCTTCCATATGGC	CCCTAATGATACAGACTTGC	V1A
YBR052C	RFS1	1	D1.1	TGAAGAGGCACCGAACCTAC	AGCACACCGTTGAATTGACC	TGAAGAGGCACCGAACCTAC	AGCACACCGTTGAATTGACC	V1A
YHR040W	BCD1	1	D1.1	CCGAGACTTAAATGGATCGA	CTGTCGCACGAAGGAGAAAC	CCGAGACTTAAATGGATCGA	CTGTCGCACGAAGGAGAAAC	V1A
YML106W	URA5	1	D1.1	ATCAGTTGTCTAATGCGTGG	CTAAGGGCTGTTAATCTTGG	ATCAGTTGTCTAATGCGTGG	CTAAGGGCTGTTAATCTTGG	V1A
YPL031C	PHO85	1	D1.1	AGTACACTTGAACTCCATGC	CGCTATAACGTATCCGATCA	AGTACACTTGAACTCCATGC	CGCTATAACGTATCCGATCA	V1A
YGR283C	#REF!	1	D1.1	CCTGCGTGCAAATCTAACAA	TGTACCGGCATCACCTTTGG	CCTGCGTGCAAATCTAACAA	TGTACCGGCATCACCTTTGG	V1A
YDL085C-A	#REF!	1	D1.1	TCCCAGGAGATAAAGCCTCA	TATTGTCGAACATGGGTGCC	TCCCAGGAGATAAAGCCTCA	TATTGTCGAACATGGGTGCC	V1A
YGR052W	FMP48	1	D1.1	CGAATTAACCGCAACTGCTA	CATACTTACGAAGCTGTACC	CGAATTAACCGCAACTGCTA	CATACTTACGAAGCTGTACC	V1A
YDR513W	GRX2	1	D1.1	CTCATAGTTGGTAATACGGG	CATACGTCACGACTAGCTGA	CTCATAGTTGGTAATACGGG	CATACGTCACGACTAGCTGA	V1A
YOR110W	TFC7	1	D1.1	TACCTATTGACCAGTGGGCG	GTAGATGCTATCCCAGCTCG	TACCTATTGACCAGTGGGCG	GTAGATGCTATCCCAGCTCG	V1A
YNR034W	SOL1	1	D1.1	AGCACCTGACGCATCATAGG	TACCATGCTGAAGGAGTTGC	AGCACCTGACGCATCATAGG	TACCATGCTGAAGGAGTTGC	V1A
YPL161C	BEM4	1	D1.1	GGCCTAAGAACAGACTCTCA	AGCAGTGATTCATGCCTCGT	GGCCTAAGAACAGACTCTCA	AGCAGTGATTCATGCCTCGT	V1A
YGR037C	ACB1	1	D1.1	TCCATCAGAAGACAGTGTGA	CTACTGGACGTGAGCTGACT	TCCATCAGAAGACAGTGTGA	CTACTGGACGTGAGCTGACT	V1A
YDR235W	PRP42	1	D1.1	ATACCTGAGCCAGAGTTGCG	GATACCATAGCATTAGGTCG	ATACCTGAGCCAGAGTTGCG	GATACCATAGCATTAGGTCG	V1A
YDL184C	RPL41A	1	D1.1	GCCTAGCTGGCATTCTTCAT	GATCACTACACAGTATGTCC	GCCTAGCTGGCATTCTTCAT	GATCACTACACAGTATGTCC	V1A
YOL126C	MDH2	1	D1.1	ACCCAGCATATAAGGTCATC	ATAGGGACTACAGCTCGCTC	ACCCAGCATATAAGGTCATC	ATAGGGACTACAGCTCGCTC	V1A
YDR022C	ATG31	1	D1.1	CCGGGAGCTTAATATACATC	CCTATCCGTACATATCGAGG	CCGGGAGCTTAATATACATC	CCTATCCGTACATATCGAGG	V1A
YLR028C	ADE16	1	D1.1	ACATCGGGTAAACGCCTCGA	AAACTGGTCTGAACGTCCTC	ACATCGGGTAAACGCCTCGA	AAACTGGTCTGAACGTCCTC	V1A
YHR021C	RPS27B	1	D1.1	TACATACCACGACCTTGAAG	CAGGATAGATCAGCTTACAG	TACATACCACGACCTTGAAG	CAGGATAGATCAGCTTACAG	V1A
YGR017W	#REF!	1	D1.1	CTGATTCCACGAGGTATGTG	CTCACGAGTAGTCATGGGAT	CTGATTCCACGAGGTATGTG	CTCACGAGTAGTCATGGGAT	V1A
YML006C	GIS4	1	D1.1	AACTGAACATACCCGGTGAC	ACACCCGGATAATGTCTTTC	AACTGAACATACCCGGTGAC	ACACCCGGATAATGTCTTTC	V1A
YMR142C	RPL13B	1	D1.1	AATAGGCCGTCAAGTTGCCC	ATAGCGCCGTAACCGTCTAG	AATAGGCCGTCAAGTTGCCC	ATAGCGCCGTAACCGTCTAG	V1A
YJL197W	UBP12	1	D1.1	TCATGTATGGAATGCGTTGC	GTGTCAAGCACAAGGCACCA	TCATGTATGGAATGCGTTGC	GTGTCAAGCACAAGGCACCA	V1A
YKL157W	APE2	1	D1.1	CAGATCCATGAATCAGATGC	CATGCTAAGCGATATGGCAG	CAGATCCATGAATCAGATGC	CATGCTAAGCGATATGGCAG	V1A
YML115C	VAN1	1	D1.1	AAGATGGCCCAATGTGTTGA	TCATCATCGTGCAGAGGCTG	AAGATGGCCCAATGTGTTGA	TCATCATCGTGCAGAGGCTG	V1A
YPR167C	MET16	1	D1.1	ATCCATAAGGTCGGGCAAGC	TCAGAGTCCTGAACAGCCGC	ATCCATAAGGTCGGGCAAGC	TCAGAGTCCTGAACAGCCGC	V1A
YKL173W	SNU114	1	D1.1	ACCACTTCGCTTGAATGACG	AGAACAAGACCATCGCTCGG	ACCACTTCGCTTGAATGACG	AGAACAAGACCATCGCTCGG	V1A
YHL020C	OPI1	1	D1.1	TGTGAAGCACCAACACGGCA	CCTCACGATAAAGTATGGCA	TGTGAAGCACCAACACGGCA	CCTCACGATAAAGTATGGCA	V1A
YIL075C	RPN2	1	D1.1	ATTGTAGCGCCATAGCCTCG	AGAAGACGCTCTCAATCTGC	ATTGTAGCGCCATAGCCTCG	AGAAGACGCTCTCAATCTGC	V1A
YGR057C	LST7	1	D1.1	TTGAGATTCACCAGACCAGC	CATGAAATAACAGGTGGCGC	TTGAGATTCACCAGACCAGC	CATGAAATAACAGGTGGCGC	V1A
YER156C	#REF!	1	D1.1	AATTTCCGCGAAGCGTGAGC	ATGGAGACCCTAGACACGTC	AATTTCCGCGAAGCGTGAGC	ATGGAGACCCTAGACACGTC	V1A
YAR014C	BUD14	1	D1.1	TGTCACGACCACAAAGGAGC	ATTAAGCGCACAGAGGTCGC	TGTCACGACCACAAAGGAGC	ATTAAGCGCACAGAGGTCGC	V1A
YMR242C	RPL20A	1	D1.1	GCACTCGACTCATTTACATG	GGCGTCACATATACAAATGA	GCACTCGACTCATTTACATG	GGCGTCACATATACAAATGA	V1A
YAL060W	BDH1	1	D1.1	ATCAGCCTGTCATGGTCCGT	CGTGCTCATATAGCTCGCGT	ATCAGCCTGTCATGGTCCGT	CGTGCTCATATAGCTCGCGT	V1A
YDR457W	TOM1	1	D1.1	ATTGGTCACCTAGCACTCGG	TCATAGATGTCAGCACTGGG	ATTGGTCACCTAGCACTCGG	TCATAGATGTCAGCACTGGG	V1A
YML113W	DAT1	1	D1.1	CACGAGAACCACGATCTTTA	AGTACACGCGCAGAATGCAC	CACGAGAACCACGATCTTTA	AGTACACGCGCAGAATGCAC	V1A
YNL281W	HCH1	1	D1.1	TCAGCTCGGTAACTTGCACG	TCCTTACAGTGGATGGAATG	TCAGCTCGGTAACTTGCACG	TCCTTACAGTGGATGGAATG	V1A
YDR165W	TRM82	1	D1.1	GGTTCTACACACCATAATGA	CACCTTTCGAGAGGACGATG	GGTTCTACACACCATAATGA	CACCTTTCGAGAGGACGATG	V1A
YPL267W	ACM1	1	D1.1	TATGCACTCAGACCTATTTG	GACCTACGATTGTGACGAAT	TATGCACTCAGACCTATTTG	GACCTACGATTGTGACGAAT	V1A
YNL293W	MSB3	1	D1.1	TACATGGCACTAAGGGTCAG	CATCCGTGAAATTTCCTGGG	TACATGGCACTAAGGGTCAG	CATCCGTGAAATTTCCTGGG	V1A
YDL029W	ARP2	1	D1.1	CGCTGAGACAAAGATTTCCA	TGACCGAGTCTCACGTTTGG	CGCTGAGACAAAGATTTCCA	TGACCGAGTCTCACGTTTGG	V1A
YBR058C	UBP14	1	D1.1	ATAGACTAGCGCACTCAGGG	TTGCTCGCTACACTGGATGG	ATAGACTAGCGCACTCAGGG	TTGCTCGCTACACTGGATGG	V1A
YNL180C	RHO5	1	D1.1	GCCATTTCTTCAATAGCTGC	ACGACGACGTTAATCACATC	GCCATTTCTTCAATAGCTGC	ACGACGACGTTAATCACATC	V1A
YKR043C	SHB17	1	D1.1	CAAGGACCCGCAAGTGTCTA	CACAGTAATGAACCGTTGCC	CAAGGACCCGCAAGTGTCTA	CACAGTAATGAACCGTTGCC	V1A
YDL119C	#REF!	1	D1.1	AGATTGAGACCACTAGCTCC	ATGCCAGACTCACTGTTCAT	AGATTGAGACCACTAGCTCC	ATGCCAGACTCACTGTTCAT	V1A
YBR262C	AIM5	1	D1.1	ACGATGCAGGGATGCCATAT	GAGTAGCTCACTCCACATTA	ACGATGCAGGGATGCCATAT	GAGTAGCTCACTCCACATTA	V1A
YIL020C	HIS6	1	D1.1	AAACTACGTGGCTAATGGCG	ATTTGGCATCCAGTCGCTCG	AAACTACGTGGCTAATGGCG	ATTTGGCATCCAGTCGCTCG	V1A
YKR092C	SRP40	1	D1.1	GCCCACGAGCAATTTATTCA	ATCTAGGGGCGATATAGCTG	GCCCACGAGCAATTTATTCA	ATCTAGGGGCGATATAGCTG	V1A
YPL076W	GPI2	1	D1.1	AATTCTCTGTAAGCGCGGCG	ACCTTATACCGATAGCGATA	AATTCTCTGTAAGCGCGGCG	ACCTTATACCGACAGCGATA	V1A
YMR116C	ASC1	1	D1.1	GAGATGATGCTACCCAGCCG	CATCGACCAAGATATTTCGA	GAGATGATGCTACCCAGCCG	CATCGACCAAGATATTTCGA	V1A
YMR194W	RPL36A	1	D1.1	GCATCAGTTTAATGAGTGCG	GTAGCACCTTCTTAACGTCG	GCATCAGTTTAATGAGTGCG	GTAGCACCTTCTTAACGTCG	V1A
YOL056W	GPM3	1	D1.1	AGATGGCACTCACGTCACTG	ATATACACGCGAGAGCCAGG	AGATGGCACTCACGTCACTG	ATATACACGCGAGAGCCAGG	V1A
YHR053C	CUP1-1	1	D1.1	AAAGTCACCTGCACGTTGCG	AAACTATCATTACCCGGTCG	AAAGTCACCTGCACGTTGCG	AAACTATCATTACCCGGTCG	V1A
YIL151C	ESL1	1	D1.1	TCACAGGCTTGCGCACATTC	GACCGGGTAACACGTATTTC	TCACAGGCTTGCGCACATTC	GACCGGGTAACACGTATTTC	V1A
YBR152W	SPP381	1	D1.1	CCGGCACATTAGTCAAATAC	TGGATAGCAGACAGCACACC	CCGGCACATTAGTCAAATAC	TGGATAGCAGACAGCACACC	V1A
YOR116C	RPO31	1	D1.1	AGCGCAGGCCAATGGTTATA	AGGAGAGTCTCATATTCGCC	AGCGCAGGCCAATGGTTATA	AGGAGAGTCTCATATTCGCC	V1A
YER154W	OXA1	1	D1.1	CAGGTCTAGGAATCTTTAGC	CAACGATACCGAGCCATTAG	CAGGTCTAGGAATCTTTAGC	CAACGATACCGAGCCATTAG	V1A
YMR128W	ECM16	1	D1.1	CTCTGATGACGATGTAGGAT	TCATAGGTCGTGACATGGAT	CTCTGATGACGATGTAGGAT	TCATAGGTCGTGACATGGAT	V1A
YPL111W	CAR1	1	D1.1	GATCTAGTTACAGGACGTGC	GCGATGGAGCGACTTTCTCT	GGTCTAGTTACAGGACGTGC	GCGATGGAGCGACTTTCTCT	V1A
YOR362C	PRE10	1	D1.1	GGCACACATTATTCGCAAAC	GCCGAAGCAGACTTAATCAC	GGCACACATTATTCGCAAAC	GCCGAAGCAGACTTAATCAC	V1A
YLR064W	PER33	1	D1.1	TCACACTGCGGAATTAGCGC	AGGCTTCAGCGATTGTATGT	TCACACTGCGGAATTAGCGC	AGGCTTCAGCGATTGTATGT	V1A
YNL264C	PDR17	1	D1.1	AGCACACTATGACCAGGCAG	CCTCTGTACTAATGATGCAG	AGCACACTATGACCAGGCAG	CCTCTGTACTAATGATGCAG	V1A
YHR170W	NMD3	1	D1.1	CCTGTAGACAAATGACGGCA	CAAGACCTGACAATCGCGGA	CCTGTAGACAAATGACGGCA	CAAGACCTGACAATCGCGGA	V1A
YIR023W	DAL81	1	D1.1	ATACTACGCGCAGATAGCGG	AAGCATTGCGAATCATAGCC	ATACTACGCGCAGATAGCGG	AAGCATTGCGAATCATAGCC	V1A
YJL003W	COX16	1	D1.1	TACACACCTAGGAACTCAGC	TATGGGTGACCTAACCTCGC	TACACACCTAGGAACTCAGC	TATGGGTGACCTAACCTCGC	V1A
YAR071W	PHO11	1	D1.1	GGCACATCGCAAGATATCGA	ATGACTCAGGCGTAGCCATG	GGCACATCGCAAGATATCGA	ATGACTCAGGCGTAGCCATG	V1A
YLR342W	FKS1	1	D1.1	AAGGCATTCGCAGCTTATAG	CGAGTTAATCTCAGCGAACG	AAGGCATTCGCAGCTTATAG	CGAGTTAATCTCAGCGAACG	V1A
YKL122C	SRP21	1	D1.1	CATGGGCACGAATATCATAC	CATGGGCTTAAACCTGATGA	CATGGGCACGAATATCATAC	CATGGGCTTAAACCTGATGA	V1A
YGR030C	POP6	1	D1.1	CATCAGTAGTAACAGGGAGC	ACGACAGTAACATCATTCGC	CATCAGTAGTAACAGGGAGC	ACGACAGTAACATCATTCGC	V1A
YGR103W	NOP7	1	D1.1	AGGCGCTTAGTAGATCGTAT	ATCCCTATGTGACGGAGAGT	AGGCGCTTAGTAGATCGTAT	ATCCCTATGTGACGGAGAGT	V1A
YPR057W	BRR1	1	D1.1	GCCACTTGGATAAGAGCTAG	AGCTACGCGCTTTGAACACG	GCCACTTGGATAAGAGCTAG	AGCTACGCGCTTTGAACACG	V1A
YBR055C	PRP6	1	D1.1	GGCCTCTCGTGCCATGTATT	TCTAAGTAGCAAGCACCCTA	GGCCTCTCGTGCCATGTATT	TCTAAGTAGCAAGCACCCTA	V1A
YMR220W	ERG8	1	D1.1	TGGATAATACCCTTCAACGC	CTATTTAGTCGAATGGAGGC	TGGATAATACCCTTCAACGC	CTATTTAGTCGAATGGAGGC	V1A
YLR304C	ACO1	1	D1.1	TACTACTCACGATGACTCGG	CATTGGCGTACACTACTGGG	TACTACTCACGATGACTCGG	CATTGGCGTACACTACTGGG	V1A
YDL121C	#REF!	1	D1.1	TATTTGCTACCAGGCGCACG	TCTGCACCGCCAGTTATTGG	TATTTGCTACCAGGCGCACG	TCTGCACCGCCAGTTATTGG	V1A
YBR281C	DUG2	1	D1.1	GCACCTTCATCATGTCAGTG	AATCACGCTTGGTAAGTTGG	GCACCTTCATCATGTCAGTG	AATCACGCTTGGTAAGTTGG	V1A
YDR329C	PEX3	1	D1.1	CATATTCGATTAAGGGTCGG	GTCACTACTGGAGCATTGGG	CATATTCGATTAAGGGTCGG	GTCACTACTGGAGCATTGGG	V1A
YGL108C	#REF!	1	D1.1	TGTACCGACACGCTCAGAAG	TTACATAGTACACTGCGCGG	TGTACCGACACGCTCAGAAG	TTACATAGTACACTGCGCGG	V1A
YNL167C	SKO1	1	D1.1	ACATACTACTTAGGAGAGGG	TATCTACCGCCACGTATGGA	ACATACTACTTAGGAGAGGG	TATCTACCGCCACGTATGGA	V1A
YLR253W	MCP2	1	D1.1	ATAGCGGACCACATTGCTGC	CCGTCGTATGAATCTACATC	ATAGCGGACCACATTGCTGC	CCGTCGTATGAATCTACATC	V1A
YFL001W	DEG1	1	D1.1	TAAGAGTTCAGACCACCTGC	TGACCGCTGACATTTCGTCG	TAAGAGTTCAGACCACCTGC	TGACCGCTGACATTTCGTCG	V1A
YER104W	RTT105	1	D1.1	ATGATCTCGCCAACGGGCTA	TCAGTTCAGCGCAGTCCATG	ATGATCTCGCCAACGGGCTA	TCAGTTCAGCGCAGTCCATG	V1A
YJR142W	#REF!	1	D1.1	TAGTACGGGTCAGTCTCTGT	AATACCTGGTCAAGAGGGCC	TAGTACGGGTCAGTCTCTGT	AATACCTGGTCAAGAGGGCC	V1A
YGR008C	STF2	1	D1.1	TGATACTGCCCATACTGGCG	AGGCACCTACGATATGCTCG	TGATACTGCCCATACTGGCG	AGGCACCTACGATATGCTCG	V1A
YLL032C	#REF!	1	D1.1	CGCACGATACACGTACTTTA	TATGGGACCCTATGCCACTG	TATAACGGAACAGTCTGGAC	AGGTGCACACAGCCGAACCA	V1A
YDR001C	NTH1	1	D1.1	ACACGGATCACATCGTAGTC	GCGTGCAGCAAACTCTACAA	ACACGGATCACATCGTAGTC	GCGTGCAGCAAACTCTACAA	V1A
YOR256C	TRE2	1	D1.1	GGTACAGACACTGCGACAAC	TGGTAGAACCGAACCCAGAC	GGTACAGACACTGCGACAAC	TGGTAGAACCGAACCCAGAC	V1A
YHR086W	NAM8	1	D1.1	TGCACGAGTCTCCAGTGTTG	ATTGGTCATACAGCGCCAGG	TGCACGAGTCTCCAGTGTTG	ATTGGTCATACAGCGCCAGG	V1A
YML112W	CTK3	1	D1.1	CTACGCTAATACCTAGTCAG	CCTACCGTCAGGATATTATG	CTACGCTAATACCTAGTCAG	CCTACCGTCAGGATATTATG	V1A
YLR435W	TSR2	1	D1.1	GAGCCCAGTTAATCCCATTC	ACCGAGACGGACGTACTTTC	GAGCCCAGTTAATCCCATTC	ACCGAGACGGACGTACTTTC	V1A
YJR139C	HOM6	1	D1.1	CGATACTCATCAATGCAGAC	CATTGACGAGAATCCTAGAC	CGATACTCATCAATGCAGAC	CATTGACGAGAATCCTAGAC	V1A
YEL022W	GEA2	1	D1.1	GATGGACCTCCTAACTCTAG	TTGCCAGCATTCAGGACACG	GATGGACCTCCTAACTCTAG	TTGCCAGCATTCAGGACACG	V1A
YPL012W	RRP12	1	D1.1	GGCCACAGGATCTAAATACC	GCTTTAACATAAGGCACACA	GGCCACAGGATCTAAATACC	GCTTTAACATAAGGCACACA	V1A
YLR196W	PWP1	1	D1.1	TTACAGCCACGAGATCGCAG	GATCAGCGACTATCATGGCG	TTACAGCCACGAGATCGCAG	GATCAGCGACTATCATGGCG	V1A
YIL031W	ULP2	1	D1.1	CACAGGAGGTAACACTTTGC	TGCTCATTATTCCTAAGAGG	CACAGGAGGTAACACTTTGC	TGCTCATTATTCCTAAGAGG	V1A
YLR281C	#REF!	1	D1.1	GATAGTAGCCTCACGACCTG	GCGCGTAGATGACTTTAGCT	GATAGTAGCCTCACGACCTG	GCGCGTAGATGACTTTAGCT	V1A
YLR287C	#REF!	1	D1.1	ACCTGTTCTAAACCAGTGGA	ATTGACCGACCAGGTTCGTC	ACCTGTTCTAAACCAGTGGA	ATTGACCGACCAGGTTCGTC	V1A
YPL196W	OXR1	1	D1.1	AATGCTCGGGAAGGCTACTC	AGAGACTACCTACCAGCTAG	AATGCTCGGGAAGGCTACTC	AGAGACTACCTACCAGCTAG	V1A
YDL053C	PBP4	1	D1.1	TCCTAGCGCGTGCGATCTTT	AGACTGTACGAACTGCGACC	TCCTAGCGCGTGCGATCTTT	AGACTGTACGAACTGCGACC	V1A
YPL198W	RPL7B	1	D1.1	GCACTAGACGAACTGACTAC	GACCAGGGTGTGCAATTATC	GCACTAGACGAACTGACTAC	GACCAGGGTGTGCAATTATC	V1A
YLR129W	DIP2	1	D1.1	CCGTACATGCAATCAAGCTA	GACATAGATCCAATCCGCTA	CCGTACATGCAATCAAGCTA	GACATAGATCCAATCCGCTA	V1A
YDR243C	PRP28	1	D1.1	GAGTGATAGCCCTCCACAAC	GATGCGTACCTCTTCCATGT	GAGTGATAGCCCTCCACAAC	GATGCGTACCTCTTCCATGT	V1A
YMR256C	COX7	1	D1.1	ATACGACTTCAAGGGACGCC	AGTTCATACCCACTTCGTAG	ATACGACTTCAAGGGACGCC	AGTTCATACCCACTTCGTAG	V1A
YLL007C	#REF!	1	D1.1	AGAGCTTGTCAACCTAGCGC	AGCTACGTCTCACTCTATGT	AGAGCTTGTCAACCTAGCGC	AGCTACGTCTCACTCTATGT	V1A
YBR208C	DUR1,2	1	D1.1	CATCTTGCGCGATAGGCTGT	CACCGTAGGCACATTGATTC	CATCTTGCGCGATAGGCTGT	CACCGTAGGCACATTGATTC	V1A
YOR316C	COT1	1	D1.1	AGGAGGAACTTATGTCAAGC	AGATGGCCCTAATTGTCCGC	AGGAGGAACTTATGTCAAGC	AGATGGCCCTAATTGTCCGC	V1A
YMR027W	#REF!	1	D1.1	CCGTAGCATAAAGAGCGGCA	CAGCATTGTAAATAGGCGGA	CCGTAGCATAAAGAGCGGCA	CAGCATTGTAAATAGGCGGA	V1A
YBR121C	GRS1	1	D1.1	CCTATGTGTAGACAGAGTAG	TGAGTACACATCACATAGCC	CCTATGTGTAGACAGAGTAG	TGAGTACACATCACATAGCC	V1A
YNL041C	COG6	1	D1.1	CAGGACAGGCGATCCGATAT	CGATATACGTGCAGACTATG	CAGGACAGGCGATCCGATAT	CGATATACGTGCAGACTATG	V1A
YBL039C	URA7	1	D1.1	GCCGCGTAGACAATAGATCA	TCATCGCTTGCACGGTGAGT	GCCGCGTAGACAATAGATCA	TCATCGCTTGCACGGTGAGT	V1A
YMR105C	PGM2	1	D1.1	TTATGACTCAGCAGCGAGCG	AAATTGCGATCAAGGCTCAC	TTATGACTCAGCAGCGAGCG	AAATTGCGATCAAGGCTCAC	V1A
YDR202C	RAV2	1	D1.1	AATGCACGGGCACCCTGTAT	AATCATCCCTGGAGCGGAGT	AATGCACGGGCACCCTGTAT	AATCATCCCTGGAGCGGAGT	V1A
YBL099W	ATP1	1	D1.1	CACAGTCATTAAGAGGCTAG	TATTCAGGCACAGACACACG	CACAGTCATTAAGAGGCTAG	TATTCAGGCACAGACACACG	V1A
YGL078C	DBP3	1	D1.1	GATAGTAGGCTGACTCACTT	TATGGGTCAACACATCCCTA	GATAGTAGGCTGACTCACTT	TATGGGTCAACACATCCCTA	V1A
YOR107W	RGS2	1	D1.1	ATAACCATTTCGCAGAACGC	CGCTTGACACAGAAATAGGC	ATAACCATTTCGCAGAACGC	CGCTTGACACAGAAATAGGC	V1A
YML057W	CMP2	1	D1.1	ATACTTGGGTGCAGCTACGT	ATATTCGCGTCGAGTGAGTT	ATACTTGGGTGCAGCTACGT	ATATTCGCGTCGAGTGAGTT	V1A
YDL124W	#REF!	1	D1.1	ATACAGTAGACAGATGTGGC	CTAAGCGCATTGAAGGTTGC	ATACAGTAGACAGATGTGGC	CTAAGCGCATTGAAGGTTGC	V1A
YJL030W	MAD2	1	D1.1	ATACCCTGGGAAGCAGATGC	ATTGCACAGCAGCCGGAATC	ATACCCTGGGAAGCAGATGC	ATTGCACAGCAGCCGGAATC	V1A
YNL177C	MRPL22	1	D1.1	AGGACCACCTGAAGTTTGCC	ATAGGACACGTAATCCCATC	AGGACCACCTGAAGTTTGCC	ATAGGACACGTAATCCCATC	V1A
YJL062W	LAS21	1	D1.1	TATAGAAACGAAGCTCTGGC	TATTTCGCACGGAGCACTCG	TATAGAAACGAAGCTCTGGC	TATTTCGCACGGAGCACTCG	V1A
YCR008W	SAT4	1	D1.1	CACGAATCGGAATTGACGTA	CGTGGCGATAATACGAAAGC	CACGAATCGGAATTGACGTA	CGTGGCGATAATACGAAAGC	V1A
YGR285C	ZUO1	1	D1.1	CCATCTGATTCAATATCGGC	CTATCTGGGCTCAGGATGCT	CCATCTGATTCAATATCGGC	CTATCTGGGCTCAGGATGCT	V1A
YHR179W	OYE2	1	D1.1	GGTGCCACTTACAAACAACC	TTCGGGAAGACCAGACAGAC	GGTGCCACTTACAAACAACC	TTCGGGAAGACCAGACAGAC	V1A
YPR174C	#REF!	1	D1.1	TTGGCGCATCGCTAGTCACT	CGCATGGTATCTAAGACTAG	NA	NA	V1A
YMR277W	FCP1	1	D1.1	TATCCTCTAGCACTGCGTGG	CGCCGCGAAGGCAAGATATA	TATCCTCTAGCACTGCGTGG	CGCCGCGAAGGCAAGATATA	V1A
YHR068W	DYS1	1	D1.1	GCCTAAGACAGGTGGACAAC	TTGTCACTAACACCAGAGAC	GCCTAAGACAGGTGGACAAC	TTGTCACTAACACCAGAGAC	V1A
YIL005W	EPS1	1	D1.1	AAATGATGCTCAAGACTCCC	CGCGGCTACACATATTTACA	AAATGATGCTCAAGACTCCC	CGCGGCTACACATATTTACA	V1A
YGR167W	CLC1	1	D1.1	CCCGTGAATATAAGTGAAGC	CCTGGATTTGAAGCGTATAG	CCCGTGAATATAAGTGAAGC	CCTGGATTTGAAGCGTATAG	V1A
YMR038C	CCS1	1	D1.1	TTCATCGCGCTCATGTGGTG	AACAGCCCGGCATTCTTGTG	TTCATCGCGCTCATGTGGTG	AACAGCCCGGCATTCTTGTG	V1A
YBL046W	PSY4	1	D1.1	ATGTGATTCCCACTCAGGCG	ACACGTCTGACAGTTGCATG	ATGTGATTCCCACTCAGGCG	ACACGTCTGACAGTTGCATG	V1A
YHR088W	RPF1	1	D1.1	AGAACGTAGCCCAAGGTTGA	ACACGGCTTGAACGTAGGTC	AGAACGTAGCCCAAGGTTGA	ACACGGCTTGAACGTAGGTC	V1A
YGR090W	UTP22	1	D1.1	GCGCTCACAGTTATACTAAG	TATAGCCTCACATTTGCCAG	GCGCTCACAGTTATACTAAG	TATAGCCTCACATTTGCCAG	V1A
YLR373C	VID22	1	D1.1	TGAGCCTTCTCCATAGCGTT	AAACTTCACGAACTGCTTAC	TGAGCCTTCTCCATAGCGTT	AAACTTCACGAACTGCTTAC	V1A
YNL286W	CUS2	1	D1.1	GAGACTCGCTGCATTGCCAT	GCAGCATATACATTCAGCTC	GAGACTCGCTGCATTGCCAT	GCAGCATATACATTCAGCTC	V1A
YIL157C	COA1	1	D1.1	ACGAGACCATAAGTTCTTCC	CGGAGAGACAGATTACACGC	ACGAGACCATAAGTTCTTCC	CGGAGAGACAGATTACACGC	V1A
YBL025W	RRN10	1	D1.1	TATATTCTGCCACAGCGGCG	GCAGCTACTATACGTCATGA	TATATTCTGCCACAGCGGCG	GCAGCTACTATACGTCATGA	V1A
YOR278W	HEM4	1	D1.1	CATCTGATAGCATTGCGGTG	CCGACTGATGAATCTAATGC	CATCTGATAGCATTGCGGTG	CCGACTGATGAATCTAATGC	V1A
YGR091W	PRP31	1	D1.1	GCACCTCACCAATGATAGGA	CAATGTATGACAACGGCGGA	GCACCTCACCAATGATAGGA	CAATGTATGACAACGGCGGA	V1A
YNL015W	PBI2	1	D1.1	CTCGGATAGTGCATGATATG	TATACTGCGCGACATGCGAG	CTCGGATAGTGCATGATATG	TATACTGCGCGACATGCGAG	V1A
YLR061W	RPL22A	1	D1.1	CTGGCATAACTCATAAGAGC	TATTAGCACCCGGAAGTCGC	CTGGCATAACTCATAAGAGC	TATTAGCACCCGGAAGTCGC	V1A
YMR162C	DNF3	1	D1.1	ATGCCACGAGGATGCACTAG	TTCGTACAGAGTCAGGAACG	ATGCCACGAGGATGCACTAG	TTCGTACAGAGTCAGGAACG	V1A
YEL068C	#REF!	1	D1.1	CTCGAAGCGTGGTCAATAGC	CTTACAATGGGCTGCAAGGC	CTCGAAGCGTGGTCAATAGC	CTTACAATGGGCTGCAAGGC	V1A
YCL057W	PRD1	1	D1.1	GGAGCACTCACACATAGTAC	GCGCCTAGTATTAAAGTACC	GGAGCACTCACACATAGTAC	GCGCCTAGTATTAAAGTACC	V1A
YCR063W	BUD31	1	D1.1	GGAATCTCTTGAAATGCTAG	TGGAGCTGCATCTACACACG	GGAATCTCTTGAAATGCTAG	TGGAGCTGCATCTACACACG	V1A
YDR388W	RVS167	1	D1.1	GGGCATCATTTACACCTCGG	ATTCTTGACCGATAGCTGGG	GGGCATCATTTACACCTCGG	ATTCTTGACCGATAGCTGGG	V1A
YNL280C	ERG24	1	D1.1	TACCTAACGACATTTGTGGC	ATGCGGAAGTACCTTGTTGC	TACCTAACGACATTTGTGGC	ATGCGGAAGTACCTTGTTGC	V1A
YOR131C	#REF!	1	D1.1	CATCTAGGTCCAGGCGTCAC	AATGCCCAGTTCCACGTTGG	CATCTAGGTCCAGGCGTCAC	AATGCCCAGTTCCACGTTGG	V1A
YNR053C	NOG2	1	D1.1	ACGCACTGACGATCATTCGG	ACGCCAGTTAGTTCAAATGG	ACGCACTGACGATCATTCGG	ACGCCAGTTAGTTCAAATGG	V1A
YOR323C	PRO2	1	D1.1	CAACATAGATGCCGGAAGTG	CTCACTGATGGGTAAGTATG	CAACATAGATGCCGGAAGTG	CTCACTGATGGGTAAGTATG	V1A
YKR079C	TRZ1	1	D1.1	TTCACCGAGACAAGGCGAGA	TGTTAGACACCCGTGCAAGC	TTCACCGAGACAAGGCGAGA	TGTTAGACACCCGTGCAAGC	V1A
YER049W	TPA1	1	D1.1	TTGTAGTCCCCATCTCGGGC	TATATGTTGCCACCGTCGCG	TTGTAGTCCCCATCTCGGGC	TATATGTTGCCACCGTCGCG	V1A
YFL026W	STE2	1	D1.1	AATAGTGTGCAACTCTGCCC	AAGCTGGTACAATCGTGTGA	AATAGTGTGCAACTCTGCCC	AAGCTGGTACAATCGTGTGA	V1A
YLR073C	RFU1	1	D1.1	GATCGGCATCTAGCTTGACT	GCACGCTGCATACATTTGTC	GATCGGCATCTAGCTTGACT	GCACGCTGCATACATTTGTC	V1A
YDL236W	PHO13	1	D1.1	GCGCCGTGAATAAATCTACA	ATAGGTGCTCCATCGTCCTG	GCGCCGTGAATAAATCTACA	ATAGGTGCTCCATCGTCCTG	V1A
YKL068W	NUP100	1	D1.1	CCTCGTCGATCATGGTCGTG	AAGACTGGTTAATCGGCATT	CCTCGTCGATCATGGTCGTG	AAGACTGGTTAATCGGCATT	V1A
YMR209C	#REF!	1	D1.1	TTTATATGGTGACAGAGCCG	CAGCTATGTAAACTGAGCGA	TTTATATGGTGACAGAGCCG	CAGCTATGTAAACTGAGCGA	V1A
YML108W	#REF!	1	D1.1	GTGCTCCACAGTAAACAACC	CGCAGTAACGGAATTTAGAC	GTGCTCCACAGTAAACAACC	CGCAGTAACGGAATTTAGAC	V1A
YGL232W	TAN1	1	D1.1	GCCAAAGACAGATGCCATTC	GATGACCAGCCATTACTTTC	GCCAAAGACAGATGCCATTC	GATGACCAGCCATTACTTTC	V1A
YKR023W	#REF!	1	D1.1	ACCGTACCCAGAGATAGTAG	AGATAGCACGTCACTACACG	ACCGTACCCAGAGATAGTAG	AGATAGCACGTCACTACACG	V1A
YGR253C	PUP2	1	D1.1	CCAGTTAAGATAATCGGAAC	CCGGATTGATAATAGGCTAG	CCAGTTAAGATAATCGGAAC	CCGGATTGATAATAGGCTAG	V1A
YNR024W	MPP6	1	D1.1	GGAGGCAGTACACTACCTTC	CCCATGACAGGGTGCTAAAG	GGAGGCAGTACACTACCTTC	CCCATGACAGGGTGCTAAAG	V1A
YHL030W	ECM29	1	D1.1	TAACAGGCCCGCAAGGCTTA	TGGCTAACATTCACGAACAC	TAACAGGCCCGCAAGGCTTA	TGGCTAACATTCACGAACAC	V1A
YCR016W	#REF!	1	D1.1	GAGTTGGGCCCATATCCCTA	GACTACGTTCTATCACTGCT	GAGTTGGGCCCATATCCCTA	GACTACGTTCTATCACTGCT	V1A
YDL141W	BPL1	1	D1.1	GGACAGCAGATCCACCTAAG	AAGCAGCGATCCTAATCCAG	GGACAGCAGATCCACCTAAG	AAGCAGCGATCCTAATCCAG	V1A
YKR025W	RPC37	1	D1.1	AGACGTGTAGAAGCCCTTAC	ATAATGGCCTTTCAACCCAG	AGACGTGTAGAAGCCCTTAC	ATAATGGCCTTTCAACCCAG	V1A
YGL129C	RSM23	1	D1.1	GATCATGTGCTCTAAGACGG	GAGATTCTTCAACATCAGCC	GATCATGTGCTCTAAGACGG	GAGATTCTTCAACATCAGCC	V1A
YIL017C	VID28	1	D1.1	TCGAGCATAGAACGCGAGAC	AAGTACATCGAAGCAGCAGC	TCGAGCATAGAACGCGAGAC	AAGTACATCGAAGCAGCAGC	V1A
YMR269W	TMA23	1	D1.1	CAGCGACCGAGATTATGTGC	TGTATCGACCGCCATCTGTG	CAGCGACCGAGATTATGTGC	TGTATCGACCGCCATCTGTG	V1A
YBR100W	#N/A	1	D1.1	AATTTGTGCGAAGCCGCTCC	AGATGATGCTAACTTACCTC	AATTTGTGCGAAGCCGCTCC	AGATGATGCTAACTTACCTC	V1A
YCR053W	THR4	1	D1.1	GAGGTAAGCAGATGTCATTC	GGTCCAACATCATGCCAATA	GAGGTAAGCAGATGTCATTC	GGTCCAACATCATGCCAATA	V1A
YIL130W	ASG1	1	D1.1	GCTCCGTTCAAACAGATCAA	CATGTGTAGTAATCGTAGCG	GCTCCGTTCAAACAGATCAA	CATGTGTAGTAATCGTAGCG	V1A
YKR041W	#REF!	1	D1.1	AAGATACCGTAACATGCGGC	AGGTACTACATCCACTACAG	AAGATACCGTAACATGCGGC	AGGTACTACATCCACTACAG	V1A
YGR031W	IMO32	1	D1.1	ACGTACAGTTAAGCGACTAG	ATTGATACCACGCGGAACGA	ACGTACAGTTAAGCGACTAG	ATTGATACCACGCGGAACGA	V1A
YPR110C	RPC40	1	D1.1	GCCCAGATAGAATTGCATGA	TGGATGCAGAAACGCCCACA	GCCCAGATAGAATTGCATGA	TGGATGCAGAAACGCCCACA	V1A
YGL010W	#REF!	1	D1.1	GTGCATATAAGACACCGTAC	ACTGAGGAACGAGACGTACT	GTGCATATAAGACACCGTAC	ACTGAGGAACGAGACGTACT	V1A
YGL120C	PRP43	1	D1.1	ACCATCTTATGACAGGGCGG	TTACACGTATCAGAGTCGGG	ACCATCTTATGACAGGGCGG	TTACACGTATCAGAGTCGGG	V1A
YDR362C	TFC6	1	D1.1	GCAACTCTTCTGCCAGTATT	TCGTCCATAACAGGCAACTA	GCAACTCTTCTGCCAGTATT	TCGTCCATAACAGGCAACTA	V1A
YKL021C	MAK11	1	D1.1	TGACACTAGCCACATAGGGC	TTAGCGACACCATGCTGTGC	TGACACTAGCCACATAGGGC	TTAGCGACACCATGCTGTGC	V1A
YLR043C	TRX1	1	D1.1	AGAGCAGCACCACTATTGGC	ACCCACAATAAAGGTGTTGC	AGAGCAGCACCACTATTGGC	ACCCACAATAAAGGTGTTGC	V1A
YBR197C	#REF!	1	D1.1	CAATAGTTATGCAGGTTCGG	TATTCAGCTCGGGTAATGGA	CAATAGTTATGCAGGTTCGG	TATTCAGCTCGGGTAATGGA	V1A
YER081W	SER3	1	D1.1	AGATGCTTCACAATTCCCGA	CCTGCGAGAGTTTATAAATG	NA	NA	V1A
YNL080C	EOS1	1	D1.1	CACTTGACGCAAGGTTTATA	CAGACTTTAGAATGTCCACC	CACTTGACGCAAGGTTTATA	CAGACTTTAGAATGTCCACC	V1A
YHR083W	SAM35	1	D1.1	CCTAATGCTAGACATTGATC	CAATGGAGTCTAGCTGGCTT	CCTAATGCTAGACATTGATC	CAATGGAGTCTAGCTGGCTT	V1A
YOL124C	TRM11	1	D1.1	GGCCCGAGTACGAATAATAC	TGAGGAAGACCATCTGCACC	GGCCCGAGTACGAATAATAC	TGAGGAAGACCATCTGCACC	V1A
YBR211C	AME1	1	D1.1	TCCTCGGAGCTAGGGCTATT	AAGCAGTTGGAACCACGTCC	TCCTCGGAGCTAGGGCTATT	AAGCAGTTGGAACCACGTCC	V1A
YML058W	SML1	1	D1.1	CGGATCGTAGCATCTCCTGC	GATGAGACAGTTGACGAATC	CGGATCGTAGCATCTCCTGC	GATGAGACAGTTGACGAATC	V1A
YMR011W	HXT2	1	D1.1	GATTCATCTACATGCTGAGG	ATGATCCCACTAAGTCTTGC	GATTCATCTACATGCTGAGG	ATGATCCCACTAAGTCTTGC	V1A
YGR202C	PCT1	1	D1.1	AGAGCTTCAACATTGCTGAC	CACACGGGTAGAAGTGAACC	AGAGCTTCAACATTGCTGAC	CACACGGGTAGAAGTGAACC	V1A
YOR310C	NOP58	1	D1.1	GGAGCTATACCACTACTGTC	ATTCACGGACCAGGACGTTC	NA	NA	V1A
YNL162W	RPL42A	1	D1.1	GGCTAAGAACTTCGTACAAT	GGGAAGATACCCTCAACGAC	GGCTAAGAACTTCGTACAAT	GGGAAGATACCCTCAACGAC	V1A
YNL098C	RAS2	1	D1.1	GGGCGTCCAACAATGCACAA	GCACTATGATAATCTCCGTC	GGGCGTCCAACAATGCACAA	GCACTATGATAATCTCCGTC	V1A
YLR298C	YHC1	1	D1.1	CCATGTAACTCAAGTCAGAC	GATAGAGCGACCATTCCAGC	CCATGTAACTCAAGTCAGAC	GATAGAGCGACCATTCCAGC	V1A
YBL080C	PET112	1	D1.1	ACAGGAGTACAACTTCTGGA	AAGGACTGTCAATCATTCCC	NA	NA	V1A
YNL292W	PUS4	1	D1.1	AGACACGACACACTGGCTTA	GCGGGACACATTGAACACAC	AGACACGACACACTGGCTTA	GCGGGACACATTGAACACAC	V1A
YNL110C	NOP15	1	D1.1	AGATTCCTACAAGTCCCTGA	AATACCGTGGCAATCGAGCC	AGATTCCTACAAGTCCCTGA	AATACCGTGGCAATCGAGCC	V1A
YER034W	#REF!	1	D1.1	CGACTCTAATAGCCGATAAG	CCTGTTAGTTAATGGGCATG	CGACTCTAATAGCCGATAAG	CCTGTTAGTTAATGGGCATG	V1A
YJL062W-A	COA3	1	D1.1	TATTGCGCGGGACCTCTGTT	AATTTCGATGAACCGGCGGC	TATTGCGCGGGACCTCTGTT	AATTTCGATGAACCGGCGGC	V1A
YOR359W	VTS1	1	D1.1	CATGCTCACTAATCTGACAG	CCACGGTCGAGACTGATATG	CATGCTCACTAATCTGACAG	CCACGGTCGAGACTGATATG	V1A
YCR035C	RRP43	1	D1.1	TACTGCTCGATAGGTGGATT	ACACCCGTAGAATCAGTGAC	TACTGCTCGATAGGTGGATT	ACACCCGTAGAATCAGTGAC	V1A
YDL018C	ERP3	1	D1.1	AATCTCTTAGAACGGGCACC	AGACTTCACTAACGGGCCAG	AATCTCTTAGAACGGGCACC	AGACTTCACTAACGGGCCAG	V1A
YER158C	#REF!	1	D1.1	ATAGCTGAGTAATGGCCTAG	GGCACTACTCAAGCATCTTA	ATAGCTGAGTAATGGCCTAG	GGCACTACTCAAGCATCTTA	V1A
YNL035C	#REF!	1	D1.1	AATATGTAGCACACGCCAGC	AGAGCTTAACCACGAGCAGC	AATATGTAGCACACGCCAGC	AGAGCTTAACCACGAGCAGC	V1A
YIL035C	CKA1	1	D1.1	GTCGATCTCAGGGTGATAAT	GCCTGTATAGTAGCGTATGT	GTCGATCTCAGGGTGATAAT	GCCTGTATAGTAGCGTATGT	V1A
YJL109C	UTP10	1	D1.1	CACAGAGCGGCAAGGACTTA	AATGCGGGAGTGCCTGACAT	CACAGAGCGGCAAGGACTTA	AATGCGGGAGTGCCTGACAT	V1A
YMR304W	UBP15	1	D1.1	CATAGTAGGCAATGCGGTTC	TGTTAAGAACGACGTGCCAC	CATAGTAGGCAATGCGGTTC	TGTTAAGAACGACGTGCCAC	V1A
YGL148W	ARO2	1	D1.1	ATTAGAGGCGCAGCACCATG	CTATGAAGGGAATGCACAGC	ATTAGAGGCGCAGCACCATG	CTATGAAGGGAATGCACAGC	V1A
YOR017W	PET127	1	D1.1	AGATGTAGACCACCGTGTCC	ACATAGCTTGAAGGGTCCTC	AGATGTAGACCACCGTGTCC	ACATAGCTTGAAGGGTCCTC	V1A
YBR167C	POP7	1	D1.1	GACTGCCATAGACTGCATTC	CGGCTCAACATAGGCCAATA	GACTGCCATAGACTGCATTC	CGGCTCAACATAGGCCAATA	V1A
YBL016W	FUS3	1	D1.1	GTCAGCCCTAGATGCACTTG	TATTGCGTGACACCTGCTCG	GTCAGCCCTAGATGCACTTG	TATTGCGTGACACCTGCTCG	V1A
YER021W	RPN3	1	D1.1	TTTACCACCATAGACAGAGC	ATATGAGAGCCACCAGTCGC	TTTACCACCATAGACAGAGC	ATATGAGAGCCACCAGTCGC	V1A
YML026C	RPS18B	1	D1.1	GCAGCCTAGCTCAGATTATG	GGATGCCACTTCATACACTG	GCAGCCTAGCTCAGATTATG	GGATGCCACTTCATACACTG	V1A
YMR093W	UTP15	1	D1.1	CGCCTGAGCTACAAAGATGA	GTGCTCTCAATAAAGCCACA	CGCCTGAGCTACAAAGATGA	GTGCTCTCAATAAAGCCACA	V1A
YIL091C	UTP25	1	D1.1	AGTAAGACACCATTCTGTAC	GAGGCACTATAACCATTACC	AGTAAGACACCATTCTGTAC	GAGGCACTATAACCATTACC	V1A
YFR018C	#REF!	1	D1.1	AGAGCACTTTAACCACGGGC	AAACCTCCCTGAACGTGTGC	AGAGCACTTTAACCACGGGC	AAACCTCCCTGAACGTGTGC	V1A
YDR050C	TPI1	1	D1.1	ATGGCGTCTCTCACGTCCGT	AGCCGTATTGTCAGATCGTT	ATGGCGTCTCTCACGTCCGT	AGCCGTATTGTCAGATCGTT	V1A
YPL183C	RTT10	1	D1.1	ATTATAGATGCAGAGGACCG	TGGTCTCCACGATCACTTGG	NA	NA	V1A
YOR358W	HAP5	1	D1.1	CCACTGTGTAAAGACTCGGA	CCGCGACATTAAGTCAAGAC	CCACTGTGTAAAGACTCGGA	CCGCGACATTAAGTCAAGAC	V1A
YKL192C	ACP1	1	D1.1	TATGGCACCACACGAAGGAC	GCCGACGACATAATCTTTAT	TATGGCACCACACGAAGGAC	GCCGACGACATAATCTTTAT	V1A
YBL056W	PTC3	1	D1.1	AGAGCCATTACACTAACTGC	GAAGACCCATGCACTGAATC	AGAGCCATTACACTAACTGC	GAAGACCCATGCACTGAATC	V1A
YBL021C	HAP3	1	D1.1	TACAGACGGACCCAGATGTC	TACTATCCACCATGCTTAGG	TACAGACGGACCCAGATGTC	TACTATCCACCATGCTTAGG	V1A
YJR098C	#REF!	1	D1.1	CTACAGTTGAGAACAGGGAC	AGGAGCACTATATCTCCACC	CTACAGTTGAGAACAGGGAC	AGGAGCACTATATCTCCACC	V1A
YLR456W	#REF!	1	D1.1	AATCTGGGTGAAGCATTGTC	ACAGTGGCGCAAGGCTCTTA	AATCTGGGTGAAGCATTGTC	ACAGTGGCGCAAGGCTCTTA	V1A
YDL021W	GPM2	1	D1.1	ACACTCGTACCATTGATGCG	CAGTCAGATGGATTAAGTCG	ACACTCGTACCATTGATGCG	CAGTCAGATGGATTAAGTCG	V1A
YKR096W	ESL2	1	D1.1	CCGATGAAGACAGTAGTGAC	GGCGCTTTATCAATCTAACC	CCGATGAAGACAGTAGTGAC	GGCGCTTTATCAATCTAACC	V1A
YDR083W	RRP8	1	D1.1	CATTGTAGATCAGTCTGTGG	GGCTCTTCAGCAATCCTATA	CATTGTAGATCAGTCTGTGG	GGCTCTTCAGCAATCCTATA	V1A
YOR148C	SPP2	1	D1.1	ACTGGACGGAGCTATATTTG	AGATCGCACTGCCGACGAAT	ACTGGACGGAGCTATATTTG	AGATCGCACTGCCGACGAAT	V1A
YGL161C	YIP5	1	D1.1	AGTAGCCACCTAAGTCATTC	AGTATCCTCACAGGTCTTTC	AGTAGCCACCTAAGTCATTC	AGTATCCTCACAGGTCTTTC	V1A
YPR035W	GLN1	1	D1.1	TAGAGAGGATCACACCCAGC	CATATCACTAGACACGATGC	TAGAGAGGATCACACCCAGC	CATATCACTAGACACGATGC	V1A
YNL006W	LST8	1	D1.1	CTGAACAGTTAATTCCACGC	CAGTCTGAGTAATCCGTTAG	CTGAACAGTTAATTCCACGC	CAGTCTGAGTAATCCGTTAG	V1A
YDR093W	DNF2	1	D1.1	GGATCGCTATAATCTCCTTC	CCCATCCAGGTAACTTAAAG	GGATCGCTATAATCTCCTTC	CCCATCCAGGTAACTTAAAG	V1A
YBR196C	PGI1	1	D1.1	ACATACGGTAAAGCTGTGGA	AATGAGCGTCAAGATTTCCC	ACATACGGTAAAGCTGTGGA	AATGAGCGTCAAGATTTCCC	V1A
YCR031C	RPS14A	1	D1.1	CGCATTGTGACAGATGTTCG	TTGCATCACGCATGTGGTGC	NA	NA	V1A
YNR015W	SMM1	1	D1.1	TATCCGTCGGAGCGCGTTTC	AGGTTACCACTACACGAATC	TATCCGTCGGAGCGCGTTTC	AGGTTACCACTACACGAATC	V1A
YKL001C	MET14	1	D1.1	GATCAGCCTTTACATTCCTG	GATGGTCTTCCACCTGTGCT	GATCAGCCTTTACATTCCTG	GATGGTCTTCCACCTGTGCT	V1A
YGR097W	ASK10	1	D1.1	CTGTCATAACGACGGCTAAG	ATTGAAGTACGGCTAAGCAG	CTGTCATAACGACGGCTAAG	ATTGAAGTACGGCTAAGCAG	V1A
YPL158C	AIM44	1	D1.1	CAATGCACGGTAGAGTATCT	AATACTGCGAAAGCGCGCAA	CAATGCACGGTAGAGTATCT	AATACTGCGAAAGCGCGCAA	V1A
YCR047C	BUD23	1	D1.1	TATGCGCTCGGACTCCTTGT	ACCAAGGTATGGCAAGTCGC	TATGCGCTCGGACTCCTTGT	ACCAAGGTATGGCAAGTCGC	V1A
YFR004W	RPN11	1	D1.1	GAGGAGACTGTACTATCATG	ATTAGGTCGCCCAGCTACTG	GAGGAGACTGTACTATCATG	ATTAGGTCGCCCAGCTACTG	V1A
YML056C	IMD4	1	D1.1	ATTGAGCGACTGACCGCCAT	GATAGCATCCGAGACAGCTC	ATTGAGCGACTGACCGCCAT	GATAGCATCCGAGACAGCTC	V1A
YLR059C	REX2	1	D1.1	TCGAGTCCGGTCCATGAGTT	AAAGGTCGTTCAATGTTCGT	NA	NA	V1A
YOR262W	GPN2	1	D1.1	GCGTTACACAGATCATAAGC	AATTAACGACCAGTACGCGC	GCGTTACACAGATCATAAGC	AATTAACGACCAGTACGCGC	V1A
YDR132C	#REF!	1	D1.1	CATATACCGCAATGGAGCTA	ATAGGCTCCCAAGCTGCTAA	CATATACCGCAATGGAGCTA	ATAGGCTCCCAAGCTGCTAA	V1A
YDL235C	YPD1	1	D1.1	ACCATCAGCAGATAGACGGA	ATACGGAGCGGACACCTATG	ACCATCAGCAGATAGACGGA	ATACGGAGCGGACACCTATG	V1A
YOR159C	SME1	1	D1.1	AGACTATCTCTAATGACCCG	ATCACTTATCGCAGGTAGGG	AGACTATCTCTAATGACCCG	ATCACTTATCGCAGGTAGGG	V1A
YOR061W	CKA2	1	D1.1	ATGACGAGCCCATGACCTAG	GTTGAGGCCCTCACCTAACG	ATGACGAGCCCATGACCTAG	GTTGAGGCCCTCACCTAACG	V1A
YDR385W	EFT2	1	D1.1	TACGCGAACCCATTGGTAGC	ACTGCACATAGGGCACAGGC	TACGCGAACCCATTGGTAGC	ACTGCACATAGGGCACAGGC	V1A
YDL138W	RGT2	1	D1.1	TCTAGTATGACAGAGGGTTC	TATGTTCTGACAGCCTCCGG	NA	NA	V1A
YBR173C	UMP1	1	D1.1	AATGATGTTGAATGTGCCCG	ATTTGCCGACCCGTACTTGG	AATGATGTTGAATGTGCCCG	ATTTGCCGACCCGTACTTGG	V1A
YJL149W	DAS1	1	D1.1	TATTGGCGCCCAGCACGTAG	TTTGGCGCACTACCATCTGG	TATTGGCGCCCAGCACGTAG	TTTGGCGCACTACCATCTGG	V1A
YGR075C	PRP38	1	D1.1	TCCGATCTTGCATGGTGGCT	CCACTGTTAGCAGATGTTGG	TCCGATCTTGCATGGTGGCT	CCACTGTTAGCAGATGTTGG	V1A
YOL125W	TRM13	1	D1.1	TCGCGCTATAAACGAATCCA	TCTGTAATAGGAAGGCAGCC	TCGCGCTATAAACGAATCCA	TCTGTAATAGGAAGGCAGCC	V1A
YOR281C	PLP2	1	D1.1	CAGATTCCATAACACGGGAC	GTGCAGACATCTACAGAACC	CAGATTCCATAACACGGGAC	GTGCAGACATCTACAGAACC	V1A
YFR052W	RPN12	1	D1.1	CAGTCATCGTAACCTGATAG	TACATGAAGATAACGAGCGC	CAGTCATCGTAACCTGATAG	TACATGAAGATAACGAGCGC	V1A
YFR031C-A	RPL2A	1	D1.1	TAGTGTCCACCATGTCTGGC	ACCTACTGAGGAGACGCATT	TAGTGTCCACCATGTCTGGC	ACCTACTGAGGAGACGCATT	V1A
YNL104C	LEU4	1	D1.1	TAGACGGTCTTGCAGCCTTC	AATTTACAGGAAGGGTCAGC	TAGACGGTCTTGCAGCCTTC	AATTTACAGGAAGGGTCAGC	V1A
YHL003C	LAG1	1	D1.1	TGAGGCTACCCACCTATGCG	TAAAGCGTACTTACCAGTCG	TGAGGCTACCCACCTATGCG	TAAAGCGTACTTACCAGTCG	V1A
YPL243W	SRP68	1	D1.1	TTCATCTCGCCATCGGAGTG	TCGAGATCAGAACGGAGCAC	TTCATCTCGCCATCGGAGTG	TCGAGATCAGAACGGAGCAC	V1A
YNL282W	POP3	1	D1.1	TGGCGAGTAATACAGACGAC	CGCCGTTACTCAATGATTAC	TGGCGAGTAATACAGACGAC	CGCCGTTACTCAATGATTAC	V1A
YAR015W	ADE1	1	D1.1	GATACCAGTCTCACCGATTC	GGATGGCTCACACTTCTTTC	GATACCAGTCTCACCGATTC	GGATGGCTCACACTTCTTTC	V1A
YCL030C	HIS4	1	D1.1	GCCCATTTCTAATTCCGTAG	GTATCATATCCATGTCCACG	GCCCATTTCTAATTCCGTAG	GTATCATATCCATGTCCACG	V1A
YKR059W	TIF1	1	D1.1	TTATCGACTGCCAGCGACTG	ATATAGCATCGCAGCGCAGG	TTATCGACTGCCAGCGACTG	ATATAGCATCGCAGCGCAGG	V1A
YPR020W	ATP20	1	D1.1	GGCCATAACATGCAAGTGTA	GCCGTTGCCATAATAAGAAC	GGCCATAACATGCAAGTGTA	GCCGTTGCCATAATAAGAAC	V1A
YNL275W	BOR1	1	D1.1	ATCCCATAGGCACTGGCATG	TATCTGTCGCCATGCCTGTA	ATCCCATAGGCACTGGCATG	TATCTGTCGCCATGCCTGTA	V1A
YBR256C	RIB5	1	D1.1	CATCTAAGCTAAGGGAGTTC	CATGAGTTTGAAGTACCTGG	CATCTAAGCTAAGGGAGTTC	CATGAGTTTGAAGTACCTGG	V1A
YJR070C	LIA1	1	D1.1	GACTCTACGATACGTCGCTG	GACGTATTGGCATAGTTGCT	GACTCTACGATACGTCGCTG	GACGTATTGGCATAGTTGCT	V1A
YPL212C	PUS1	1	D1.1	ATGTCGCATCAGCCAGTAAG	ACTAATGGCCTGGAATGCAA	ATGTCGCATCAGCCAGTAAG	ACTAATGGCCTGGAATGCAA	V1A
YDL213C	NOP6	1	D1.1	AACAGCCCTGCAATGGTTTA	GAATAGGAACCACGCTGCAC	AACAGCCCTGCAATGGTTTA	GAATAGGAACCACGCTGCAC	V1A
YBR218C	PYC2	1	D1.1	AGACGTAGCGAACTAGACCC	AAGGACCTCTAAGTCGATAG	AGACGTAGCGAACTAGACCC	AAGGACCTCTAAGTCGATAG	V1A
YJL191W	RPS14B	1	D1.1	AGATTGCATGAACCGCCAGC	CCCAAATGAAGAGTCGATGC	AGATTGCATGAACCGCCAGC	CCCAAATGAAGAGTCGATGC	V1A
YDR009W	GAL3	1	D1.1	CAGATGAGTACAGAGGATTC	CATGCTGCAACATCGCGTTA	CAGATGAGTACAGAGGATTC	CATGCTGCAACATCGCGTTA	V1A
YHR147C	MRPL6	1	D1.1	ACGGCGACGAGATACTCATG	AACGAGATAGTGACGTACTG	ACGGCGACGAGATACTCATG	AACGAGATAGTGACGTACTG	V1A
YNL096C	RPS7B	1	D1.1	TATTGCGCTCCAGCTCGGAT	CAGCGCGTACTAGACTGGAT	TATTGCGCTCCAGCTCGGAT	CAGCGCGTACTAGACTGGAT	V1A
YLR362W	STE11	1	D1.1	ACCTAGATAGCTGTAGCCAT	GCGCATGAGACATTTACATC	ACCTAGATAGCTGTAGCCAT	GCGCATGAGACATTTACATC	V1A
YKR011C	#REF!	1	D1.1	CCGAGATGGTAATTCATGTC	CATGCAACGAACCTAGTCAA	CCGAGATGGTAATTCATGTC	CATGCAACGAACCTAGTCAA	V1A
YMR149W	SWP1	1	D1.1	CATAATGTCCAAGCACGCTA	GCGCAGATATAATTCACGAC	CATAATGTCCAAGCACGCTA	GCGCAGATATAATTCACGAC	V1A
YMR303C	ADH2	1	D1.1	TAGTACCCGGAACCTAGGGC	ACATAGGTAACAGGAGTCGC	TAGTACCCGGAACCTAGGGC	ACATAGGTAACAGGAGTCGC	V1A
YOR133W	EFT1	1	D1.1	TAACTGCCGCGAGTCGTCTT	ATATACGGGTAACCAGCCGC	TAACTGCCGCGAGTCGTCTT	ATATACGGGTAACCAGCCGC	V1A
YPR003C	#REF!	1	D1.1	ATCGCAGTGAGCATCATCGG	AAACGATACGGATTCATGGG	ATCGCAGTGAGCATCATCGG	AAACGATACGGATTCATGGG	V1A
YML059C	NTE1	1	D1.1	CCATTTGATACACTCTGGGC	ACGATCCATAGACACATTGC	CCATTTGATACACTCTGGGC	ACGATCCATAGACACATTGC	V1A
YGR203W	YCH1	1	D1.1	TCGCGGACCAGATTACTTAG	ATGACAGGCTTTGAACGACG	ATATCTTGCTCACGGCGCGC	NA	V1A
YLR367W	RPS22B	1	D1.1	ATATCGAGTGCGACATCCCG	GATACGCTCGCATACCTTGG	ATATCGAGTGCGACATCCCG	GATACGCTCGCATACCTTGG	V1A
YBL034C	STU1	1	D1.1	TGAACCATTCTCAGACATGC	CCAGCGAATGTCGATCAATC	TGAACCATTCTCAGACATGC	CCAGCGAATGTCGATCAATC	V1A
YBR242W	#REF!	1	D1.1	GACAAGGCTCCAGGTACTTG	CCCGGAGATGTTATGAAAAT	GACAAGGCTCCAGGTACTTG	CCCGGAGATGTTATGAAAAT	V1A
YNL064C	YDJ1	1	D1.1	AGATAATGGAGATGCGCCTT	CAATGATAGCGCAGATTTGG	AGATAATGGAGATGCGCCTT	CAATGATAGCGCAGATTTGG	V1A
YJL148W	RPA34	1	D1.1	TAGTAATCGACAGTGAGGTC	TATCCTACCGCATCGTGAGG	TAGTAATCGACAGTGAGGTC	TATCCTACCGCATCGTGAGG	V1A
YMR161W	HLJ1	1	D1.1	CCAGTACGCCCAATGAAATA	CAGTCGGTAGAACTATGTAC	CCAGTACGCCCAATGAAATA	CAGTCGGTAGAACTATGTAC	V1A
YGL210W	YPT32	1	D1.1	CGCGCCATACGCTAAATATA	AAGCGCCACTTTGCTCAATG	CGCGCCATACGCTAAATATA	AAGCGCCACTTTGCTCAATG	V1A
YJR080C	AIM24	1	D1.1	CACTGTAGGTTAATCTAGGG	TCAGATTTGCTAAGGACTGG	CACTGTAGGTTAATCTAGGG	TCAGATTTGCTAAGGACTGG	V1A
YPL090C	RPS6A	1	D1.1	TCCATACCGATAAAGTTCGA	TACCATGAGGGAAGATTAGC	TCCATACCGATAAAGTTCGA	TACCATGAGGGAAGATTAGC	V1A
YJL214W	HXT8	1	D1.1	CAGTTATTACCAGATAGGCG	CCTAAGATGTTGTAACCTCG	CAGTTATTACCAGATAGGCG	CCTAAGATGTTGTAACCTCG	V1A
YJL055W	#REF!	1	D1.1	CATAGCGTGGAATCTACCTC	CCGAGGCATAAACATCTTGA	CATAGCGTGGAATCTACCTC	CCGAGGCATAAACATCTTGA	V1A
YPL241C	CIN2	1	D1.1	CTCAGTACAGCGGATCACAG	GTGGGCATACAACACCAGCA	CTCAGTACAGCGGATCACAG	GTGGGCATACAACACCAGCA	V1A
YBR249C	ARO4	1	D1.1	ACACCGTATTTAAGACTGCC	ATTCCAGGCATCCAGAGTCG	ACACCGTATTTAAGACTGCC	ATTCCAGGCATCCAGAGTCG	V1A
YOR140W	SFL1	1	D1.1	TGGGCAGACACAACGCTACA	ATAGGTATCGCACGCTCCTG	TGGGCAGACACAACGCTACA	ATAGGTATCGCACGCTCCTG	V1A
YLR049C	#REF!	1	D1.1	TAGCTGCTGGAATGCTTGTC	CAGGACCAGTGTAATTGTTT	TAGCTGCTGGAATGCTTGTC	CAGGACCAGTGTAATTGTTT	V1A
YPL273W	SAM4	1	D1.1	ATTTCACTCACCTACATTGG	ATCGCAACTAACGCGCTATA	ATTTCACTCACCTACATTGG	ATCGCAACTAACGCGCTATA	V1A
YOR207C	RET1	1	D1.1	GCGATCAGAACAGATGCCGA	AAGTAGCGATCATAACGCCG	GCGATCAGAACAGATGCCGA	AAGTAGCGATCATAACGCCG	V1A
YEL008W	#REF!	1	D1.1	CACCGTCACTAAGTAGATTC	CGCATGTTCTGAAGAGTTTC	CACCGTCACTAAGTAGATTC	CGCATGTTCTGAAGAGTTTC	V1A
YGL100W	SEH1	1	D1.1	GGCCAGTCTCGCATGATTTG	ACGTCAGGTGTGTAACGAAT	GGCCAGTCTCGCATGATTTG	ACGTCAGGTGTGTAACGAAT	V1A
YOR130C	ORT1	1	D1.1	TATGACCCCGCAGTGCATGC	GTATGCCCGATCATCCTGTG	TATGACCCCGCAGTGCATGC	GTATGCCCGATCATCCTGTG	V1A
YOL144W	NOP8	1	D1.1	CCTCTGATATAATCGGGTTC	CCACTCTGTTAAGTTGCTGG	CCTCTGATATAATCGGGTTC	CCACTCTGTTAAGTTGCTGG	V1A
YGR048W	UFD1	1	D1.1	ACACCAGGGAAGGGCTTCAC	AGCTAAGACCGAGTAACCTC	ACACCAGGGAAGGGCTTCAC	AGCTAAGACCGAGTAACCTC	V1A
YML007C-A	#REF!	1	D1.1	CATCTAGTGAAAGTCAGGCA	CGCATGTTGAAATATGGCAA	CATCTAGTGAAAGTCAGGCA	CGCATGTTGAAATATGGCAA	V1A
YPR156C	TPO3	1	D1.1	GCTCAGTACCTATATCCTTA	GAGGTAGTTGCATCTCTAGT	GCTCAGTACCTATATCCTTA	GAGGTAGTTGCATCTCTAGT	V1A
YMR001C	CDC5	1	D1.1	AATAGCTGCTCAAGGCCAGC	AGACGATCACCATTCGATGC	AATAGCTGCTCAAGGCCAGC	AGACGATCACCATTCGATGC	V1A
YNL067W	RPL9B	1	D1.1	TGGCCGAGATATGTAGAAAC	CCTCAGGAAGGAGAAGTCAC	TGGCCGAGATATGTAGAAAC	CCTCAGGAAGGAGAAGTCAC	V1A
YER004W	FMP52	1	D1.1	CCGATGTATGAACAGTTTCC	AATACCCGGCGAATGTACGC	CCGATGTATGAACAGTTTCC	AATACCCGGCGAATGTACGC	V1A
YNL022C	RCM1	1	D1.1	CCATAGCACCAAGATTGTGA	ATACGTCATCTCACGAGCTG	CCATAGCACCAAGATTGTGA	ATACGTCATCTCACGAGCTG	V1A
YLR107W	REX3	1	D1.1	AGAGTCCTGCCATCTCGGAT	CGTAGCATATCATCCTGGAT	AGAGTCCTGCCATCTCGGAT	CGTAGCATATCATCCTGGAT	V1A
YML042W	CAT2	1	D1.1	TGTACGCCCGTGAGTTTCTT	AAGAGGTAGTAACACTCCGC	TGTACGCCCGTGAGTTTCTT	AAGAGGTAGTAACACTCCGC	V1A
YOR046C	DBP5	1	D1.1	TCCAGAGTTAGGAAGTAAGC	TGAGGATAAAGAACTCGCGC	TCCAGAGTTAGGAAGTAAGC	TGAGGATAAAGAACTCGCGC	V1A
YER136W	GDI1	1	D1.1	TGAATGCGCGTGAAGCACTC	CCCATAATGACAAGTCTCGA	TGAATGCGCGTGAAGCACTC	CCCATAATGACAAGTCTCGA	V1A
YFR032C-A	RPL29	1	D1.1	TATACACGGGAAGCACGAGC	AGATTCACACCATGAGTCGC	TATACACGGGAAGCACGAGC	AGATTCACACCATGAGTCGC	V1A
YDR496C	PUF6	1	D1.1	CATCGGCATGGAGCTTAGAT	GCCAGATACTTGAATCACTC	CATCGGCATGGAGCTTAGAT	GCCAGATACTTGAATCACTC	V1A
YPR046W	MCM16	1	D1.1	AAGACGACGTAAGCCCATGC	AGGAGACGTTGATAACTCAG	AAGACGACGTAAGCCCATGC	AGGAGACGTTGATAACTCAG	V1A
YJR074W	MOG1	1	D1.1	GGCAGACACGTCAAGCATAC	CGCCGAATTACCAATGATGA	GGCAGACACGTCAAGCATAC	CGCCGAATTACCAATGATGA	V1A
YMR014W	BUD22	1	D1.1	AATTATCGGTGACGAGCGTC	AGTATCTGGCGATTCCGGTT	AATTATCGGTGACGAGCGTC	AGTATCTGGCGATTCCGGTT	V1A
YMR016C	SOK2	1	D1.1	AGGACACGACGAATCTCGAC	CGCTCCTAAGACATTGTTAC	AGGACACGACGAATCTCGAC	CGCTCCTAAGACATTGTTAC	V1A
YKR018C	#REF!	1	D1.1	TGCTCCCGGCAAGAGAAACA	TAGCAACAACCAGTTCTGAC	TGCTCCCGGCAAGAGAAACA	TAGCAACAACCAGTTCTGAC	V1A
YFR039C	OSW7	1	D1.1	TACACGCTCACAGGTACTAG	TACATTTGCCCATTGGCTGG	TACACGCTCACAGGTACTAG	TACATTTGCCCATTGGCTGG	V1A
YDR161W	#REF!	1	D1.1	AAGTACAGTTTAGACCAGGG	TTCCACTGGTCAGCAGATGG	AAGTACAGTTTAGACCAGGG	TTCCACTGGTCAGCAGATGG	V1A
YLR003C	CMS1	1	D1.1	TCCCTTCAGATAAAGAGGCA	TGCAATTATGGGCAAAGGCC	TCCCTTCAGATAAAGAGGCA	TGCAATTATGGGCAAAGGCC	V1A
YKL009W	MRT4	1	D1.1	TCATTCGGTGAAGTTGCGTC	TATTACTGCCCAGGCTGAGG	TCATTCGGTGAAGTTGCGTC	TATTACTGCCCAGGCTGAGG	V1A
YNR036C	MRPS12	1	D1.1	TTGCATTCGGTTAAGACGGG	TAGGTATTAGCAGATCTGGA	TTGCATTCGGTTAAGACGGG	TAGGTATTAGCAGATCTGGA	V1A
YBL010C	#REF!	1	D1.1	TAATAGCGGCTTAACCGGCG	CCGTTATTTCTAAGACCTCG	TAATAGCGGCTTAACCGGCG	CCGTTATTTCTAAGACCTCG	V1A
YML014W	TRM9	1	D1.1	CAGCTACTGGAATAGTTTGC	CACGACGCTAAATGTCTTCA	CAGCTACTGGAATAGTTTGC	CACGACGCTAAATGTCTTCA	V1A
YOR096W	RPS7A	1	D1.1	CGATATGCAGAATAGCGCAA	CATACCGATTCACGTTGATG	CGATATGCAGAATAGCGCAA	CATACCGATTCACGTTGATG	V1A
YOL111C	MDY2	1	D1.1	GTACTATCCACAGTCCTGCG	ATTATTCGCGCCACGAGTCG	GTACTATCCACAGTCCTGCG	ATTATTCGCGCCACGAGTCG	V1A
YER057C	HMF1	1	D1.1	GGCTACACGAAATCGCTACA	ATTGCATAAGCAGAGTCCTG	GGCTACACGAAATCGCTACA	ATTGCATAAGCAGAGTCCTG	V1A
YDR292C	SRP101	1	D1.1	CCGAGTTATTGACATGAGTG	CAGATTGCAGAAGGACGCAC	CCGAGTTATTGACATGAGTG	NA	V1A
YLR386W	VAC14	1	D1.1	ACTTGTTAGACATTGGTGCG	AGACCTCTAGCAGTACGTCG	ACTTGTTAGACATTGGTGCG	AGACCTCTAGCAGTACGTCG	V1A
YJL026W	RNR2	1	D1.1	GCATGTCCTAAAGCTGCCGA	CATATAGGAGCAGTACGCCG	GCATGTCCTAAAGCTGCCGA	CATATAGGAGCAGTACGCCG	V1A
YLR074C	BUD20	1	D1.1	TCACGCGATGCAGTCGGTAT	ATCCAGATTCGACGATATTG	TCACGCGATGCAGTCGGTAT	ATCCAGATTCGACGATATTG	V1A
YGR211W	ZPR1	1	D1.1	CTAGCAAAGACAGGGTTGTA	CTAAGGGACTGCAACGGAAC	CTAGCAAAGACAGGGTTGTA	CTAAGGGACTGCAACGGAAC	V1A
YMR309C	NIP1	1	D1.1	CCTTTATTACGATGGAGGTG	ATGACGTTTCCCACGCTGTG	CCTTTATTACGATGGAGGTG	ATGACGTTTCCCACGCTGTG	V1A
YPL106C	SSE1	1	D1.1	CACGATTCAGTATCAGTTCG	ACAGATCGCTGAACTGGTGC	AGACATCTCAGATTGTGACG	CCAATACGGGTGAATACAGA	V1A
YDR148C	KGD2	1	D1.1	GAATCAGGTTTGGCAATCTC	GAGCCGTGTCCATCTTATCT	GAATCAGGTTTGGCAATCTC	GAGCCGTGTCCATCTTATCT	V1A
YNL209W	SSB2	1	D1.1	CCATGAGTCACAATGAGGCA	GCTGCACATCAATCAACGGA	CCATGAGTCACAATGAGGCA	GCTGCACATCAATCAACGGA	V1A
YLR001C	#REF!	1	D1.1	AGAGAGGACCCACACTACTC	GCGCAGCTACAATTACTTCA	AGAGAGGACCCACACTACTC	GCGCAGCTACAATTACTTCA	V1A
YJR079W	#REF!	1	D1.1	CGCACAGTGTTTCAAGATGC	TCACATGAGCCGAAGGATGC	CGCACAGTGTTTCAAGATGC	TCACATGAGCCGAAGGATGC	V1A
YDL036C	PUS9	1	D1.1	GCGCTATGACTATTCACTCT	AATTCTGGTGCAGCCGCTCT	NA	NA	V1A
YNR034W-A	#REF!	1	D1.1	GCGCTATGACTATTCACCCT	AATTCTGGTGCAGCCGCTCT	NA	NA	V1A
YAL055W	PEX22	1	D1.1	ATCACATAGAGAGACGCTGC	CACAGCGACGAACGTGATAC	ATCACATAGAGAGACGCTGC	CACAGCGACGAACGTGATAC	V1A
YHR208W	BAT1	1	D1.1	CGCGGTATTAGGACATATAG	TAAAGGCATGTTCAGCAACG	CGCGGTATTAGGACATATAG	TAAAGGCATGTTCAGCAACG	V1A
YDL222C	FMP45	1	D1.1	ATTGACTGACGCCATGACCG	TCGAGTACGAGCATTCGGCG	ATTGACTGACGCCATGACCG	TCGAGTACGAGCATTCGGCG	V1A
YER174C	GRX4	1	D1.1	CCAGGATGATGAATACGAGC	TTAGGTACACTACACGTCGC	CCAGGATGATGAATACGAGC	TTAGGTACACTACACGTCGC	V1A
YMR240C	CUS1	1	D1.1	AAGTAGACTGAACTCCGCGC	AGTTATACCAGCCGACATTC	AAGTAGACTGAACTCCGCGC	AGTTATACCAGCCGACATTC	V1A
YKL215C	OXP1	1	D1.1	GAGCCTTGCACCTATGCTAT	CAGGGCAGCGCAGTTTCTAT	GAGCCTTGCACCTATGCTAT	CAGGGCAGCGCAGTTTCTAT	V1A
YHR070W	TRM5	1	D1.1	AGAGGAACCCACGGCCTTTA	CATAGTAGAACAGTTGGCAC	AGAGGAACCCACGGCCTTTA	CATAGTAGAACAGTTGGCAC	V1A
YMR070W	MOT3	1	D1.1	TTACAGCAGCGCAGCTTAGC	TAAATCCCTTTCAAGCAGGC	TTACAGCAGCGCAGCTTAGC	TAAATCCCTTTCAAGCAGGC	V1A
YNL231C	PDR16	1	D1.1	TAGTGGCTACCAGATCACCG	TTTACCGCGAGACGCTCATG	TAGTGGCTACCAGATCACCG	TTTACCGCGAGACGCTCATG	V1A
YER006W	NUG1	1	D1.1	ATTGTGCATCCGGGACCACT	ATACAGGTTGCACGGTAGTA	ATTGTGCATCCGGGACCACT	ATACAGGTTGCACGGTAGTA	V1A
YGR093W	#REF!	3	D1.2	ACACCCAGTGAATAGAGGGC	TTTGCTTCCACGAGTGCCGT	ACACCCAGTGAATAGAGGGC	TTTGCTTCCACGAGTGCCGT	V1B
YIL074C	SER33	3	D1.2	GGATTCACCTCAAGCCGAAC	ATGCGTTACGACTCGCCAGT	GGATTCACCTCAAGCCGAAC	ATGCGTTACGACTCGCCAGT	V1B
YBR070C	ALG14	3	D1.2	TACATGCCGGGAACGTATGC	ATGATATTTCCCTCCAGCGT	TACATGCCGGGAACGTATGC	ATGATATTTCCCTCCAGCGT	V1B
YDR421W	ARO80	3	D1.2	TGTAGAAGGGAACCCACCAC	ACGATACCTTTCCAGGCAGT	NA	ACGATACCTTTCCAGGCAGT	V1B
YKL204W	EAP1	3	D1.2	CCCGCAGTTTAATAAGTTGC	ATAGTCTGCTCATCTCGCGT	CCCGCAGTTTAATAAGTTGC	ATAGTCTGCTCATCTCGCGT	V1B
YCL050C	APA1	3	D1.2	CATGGCATAACAGGTTTCAC	TGTTGTCTCAGCCGCTCAGT	CATGGCATAACAGGTTTCAC	TGTTGTCTCAGCCGCTCAGT	V1B
YDR259C	YAP6	3	D1.2	AGAGTCCCTGAACCTAGATC	AAGATTGCTTGCAGTTGCGT	AGAGTCCCTGAACCTAGATC	AAGATTGCTTGCAGTTGCGT	V1B
YLR257W	#REF!	3	D1.2	CTACCAGTATCATGGACGCG	ATCTATGTACGTGGAGCTGT	CTACCAGTATCATGGACGCG	ATCTATGTACGTGGAGCTGT	V1B
YPL175W	SPT14	3	D1.2	GGCTCTAGTATCATAGGTTG	TGTCTACGGCTGCCCAGATT	GGCTCTAGTATCATAGGTTG	TGTCTACGGCTGCCCAGATT	V1B
YPL225W	#REF!	3	D1.2	TATTATCCGAGACGTGCGCG	TTATTGCTGAGCCGTGCTGT	TATTATCCGAGACGTGCGCG	TTATTGCTGAGCCGTGCTGT	V1B
YBR177C	EHT1	3	D1.2	CCGCGAGGTTTATAGAGAAT	CGGAATACGCTTTCACGATT	CCGCGAGGTTTATAGAGAAT	CGGAATACGCTTTCACGATT	V1B
YOR317W	FAA1	3	D1.2	ATATTGAGGCCACCAGGCTC	AGGCTCTCTGCATATCTCGT	ATATTGAGGCCACCAGGCTC	AGGCTCTCTGCATATCTCGT	V1B
YKL220C	FRE2	3	D1.2	CATCTGATACCAGGATTGCG	TACGCTACCGGATTGTCTGT	CATCTGATACCAGGATTGCG	TACGCTACCGGATTGTCTGT	V1B
YMR002W	MIC17	3	D1.2	GGGACTGCACGCTATTCCAT	CAAGCCTTAGGACTTCGATT	GGGACTGCACGCTATTCCAT	CAAGCCTTAGGACTTCGATT	V1B
YJL070C	#REF!	3	D1.2	TACTAGGCTACAGTCCGTCG	CACGTCTACGGAGCTAGTGT	TACTAGGCTACAGTCCGTCG	CACGTCTACGGAGCTAGTGT	V1B
YJL060W	BNA3	3	D1.2	CAACTGAATCGAATGCGACC	CGAGAACCTTCATGGTGAGT	CAACTGAATCGAATGCGACC	CGAGAACCTTCATGGTGAGT	V1B
YLR045C	STU2	3	D1.2	GCTAGAGCATAATACTACCC	AGTGATCGCCTCCAGCTAGT	GCTAGAGCATAATACTACCC	AGTGATCGCCTCCAGCTAGT	V1B
YLR299W	ECM38	3	D1.2	ATTGTACGCACATCACGGTC	GGCGAACGCAAATCCTGTAA	ATTGTACGCACATCACGGTC	GGCGAACGCAAATCCTGTAA	V1B
YDR331W	GPI8	3	D1.2	CAATAGCCTACAAGTGTGGA	GGTATGTCTCCGCATCGTCT	CAATAGCCTACAAGTGTGGA	GGTATGTCTCCGCATCGTCT	V1B
YEL038W	UTR4	3	D1.2	AAACTACCTTCAAGTGAGCC	CTATTCCTCGGAGTGGTAGT	AAACTACCTTCAAGTGAGCC	CTATTCCTCGGAGTGGTAGT	V1B
YDL109C	#REF!	3	D1.2	ATACACGTCGAAGGAGTGCC	GCGACTCGTTGCATGTTAGT	ATACACGTCGAAGGAGTGCC	GCGACTCGTTGCATGTTAGT	V1B
YDR101C	ARX1	3	D1.2	TCGAGCGAGCAAGAGCCATA	GAGGGACGTTTCGACATTCT	TCGAGCGAGCAAGAGCCATA	GAGGGACGTTTCGACATTCT	V1B
YPR186C	PZF1	3	D1.2	TAATACCGGCGAAGTGCTCC	ATGTATTGCCGCGACCACGT	TAATACCGGCGAAGTGCTCC	ATGTATTGCCGCGACCACGT	V1B
YDL147W	RPN5	3	D1.2	TGCACGAGGCAACCAGACTA	ATAGCCCAGGTGGCACTTCT	TGCACGAGGCAACCAGACTA	ATAGCCCAGGTGGCACTTCT	V1B
YJR096W	#REF!	3	D1.2	ATACTACTCCGAGGCATGGG	ACATCAGTGGTCACGGTTGT	ATACTACTCCGAGGCATGGG	ACATCAGTGGTCACGGTTGT	V1B
YEL029C	BUD16	3	D1.2	GACTTAACCACAGGTGTTCC	CTAGATAGTGTAGACGACGT	GACTTAACCACAGGTGTTCC	CTAGATAGTGTAGACGACGT	V1B
YDR477W	SNF1	3	D1.2	CGAGTATGACTAATGACGAG	TGTTCCATTCGCACCTGGGT	CGAGTATGACTAATGACGAG	TGTTCCATTCGCACCTGGGT	V1B
YPL105C	SYH1	3	D1.2	CGCCTTGTTAAGAACAAGTA	GACCCTACGCGATGAGTTCT	CGCCTTGTTAAGAACAAGTA	GACCCTACGCGATGAGTTCT	V1B
YJL088W	ARG3	3	D1.2	GTTATAGAGATACACGGAGC	TCCGACCGTTGAGCATACGT	GTTATAGAGATACACGGAGC	TCCGACCGTTGAGCATACGT	V1B
YDR471W	RPL27B	3	D1.2	CCCTAGTAGTTAAGACTGAG	TTCTCAACCGTCTCGATGGT	CCCTAGTAGTTAAGACTGAG	TTCTCAACCGTCTCGATGGT	V1B
YLR176C	RFX1	3	D1.2	GCGTTATCTACATGGATTGG	AGGTCATATGCGCCCGAATT	GCGTTATCTACATGGATTGG	AGGTCATATGCGCCCGAATT	V1B
YPL245W	#REF!	3	D1.2	ATAAAGACGTTTCAACCCGC	TATTATAGCGCGGCCACCGT	ATAAAGACGTTTCAACCCGC	TATTATAGCGCGGCCACCGT	V1B
YLR011W	LOT6	3	D1.2	AAGACTCCGTAACTCGCTAG	TGCAACAACAGATGAGTGGT	AAGACTCCGTAACTCGCTAG	TGCAACAACAGATGAGTGGT	V1B
YJR083C	ACF4	3	D1.2	GCCATGTCGCAATCTACTTA	GCTACGTTCATGCCCGAAGT	GCCATGTCGCAATCTACTTA	GCTACGTTCATGCCCGAAGT	V1B
YGL082W	#REF!	3	D1.2	AAACTACTTGGAAGACGGGC	GCTATTAGTAGATGTGCCGT	AAACTACTTGGAAGACGGGC	GCTATTAGTAGATGTGCCGT	V1B
YMR208W	ERG12	3	D1.2	GGATCTAAGACACGGTCACC	GCCGCGTAACGATCAGTAAG	GGATCTAAGACACGGTCACC	GCCGCGTAACGATCAGTAAG	V1B
YGR266W	#REF!	3	D1.2	CCACTAAGGATAATCACTGC	AGAAGATGGCTTATCAGCGT	CCACTAAGGATAATCACTGC	AGAAGATGGCTTATCAGCGT	V1B
YER017C	AFG3	3	D1.2	CCAAGTATAGGGAATGTTGC	TATTCTGGCCCGATTCGCGT	CCAAGTATAGGGAATGTTGC	TATTCTGGCCCGATTCGCGT	V1B
YOL108C	INO4	3	D1.2	GGTCCGATAACGTAACAGAC	CTACTTAGTGAGGAGTCAGT	GGTCCGATAACGTAACAGAC	CTACTTAGTGAGGAGTCAGT	V1B
YKL152C	GPM1	3	D1.2	GAGAGTCCTTAACACCGATC	ACCGTTTGGCAGATTTGCGT	GAGAGTCCTTAACACCGATC	ACCGTTTGGCAGATTTGCGT	V1B
YOR058C	ASE1	3	D1.2	CCGTACACAGACTATATGAC	CCTTACGCTAGGTCGAGAGT	CCGTACACAGACTATATGAC	CCTTACGCTAGGTCGAGAGT	V1B
YBL059C-A	CMC2	3	D1.2	CAATAGTTCGTAAGGTCGCG	ACCTCTAGTCGATTCGCTGT	CAATAGTTCGTAAGGTCGCG	ACCTCTAGTCGATTCGCTGT	V1B
YJL099W	CHS6	3	D1.2	CAAGCATGGCGAACCAGTAC	TTATGCTACCGGAGCCGAGT	CAAGCATGGCGAACCAGTAC	TTATGCTACCGGAGCCGAGT	V1B
YNL155W	CUZ1	3	D1.2	CCCTTTAGATAACGATGCTC	GGTATGCTCCGACTTCTCGT	CCCTTTAGATAACGATGCTC	GGTATGCTCCGACTTCTCGT	V1B
YGR049W	SCM4	3	D1.2	GACCCGAAGTTTAATCAACC	CTTACCTTGAGACTGGGAGT	GACCCGAAGTTTAATCAACC	CTTACCTTGAGACTGGGAGT	V1B
YNL039W	BDP1	3	D1.2	CAATAGGCGGGAACTCAGTC	TCAGCCGATTTCACGTTCGT	CAATAGGCGGGAACTCAGTC	TCAGCCGATTTCACGTTCGT	V1B
YMR300C	ADE4	3	D1.2	AGTTACATCCCATGCGGTCG	AAGTCCCTTTCATGCCGTGT	AGTTACATCCCATGCGGTCG	AAGTCCCTTTCATGCCGTGT	V1B
YFR010W	UBP6	3	D1.2	GTAGATTACACCGAAAGCCC	TTCCGAGTCGTCAGGCTAGT	GTAGATTACACCGAAAGCCC	TTCCGAGTCGTCAGGCTAGT	V1B
YNL214W	PEX17	3	D1.2	CTCCTCGGGAAGAAGAATGA	CAGGATTATACGGATCGTCT	CTCCTCGGGAAGAAGAATGA	CAGGATTATACGGATCGTCT	V1B
YIR003W	AIM21	3	D1.2	AAAGCGCAGTGCTCATAATG	GCTTGCATCCAATGTCACTA	AAAGCGCAGTGCTCATAATG	GCTTGCATCCAATGTCACTA	V1B
YIL051C	MMF1	3	D1.2	TCAGCTTACCGTAGTTAGCC	ACTTACGCGGGCCATGTAGT	TCAGCTTACCGTAGTTAGCC	ACTTACGCGGGCCATGTAGT	V1B
YGR208W	SER2	3	D1.2	GAGTAGACGACACCATTGCC	CCCGGTGACTGATATTTAGT	GAGTAGACGACACCATTGCC	CCCGGTGACTGATATTTAGT	V1B
YJL101C	GSH1	3	D1.2	GGCTACATGCAACCATACTA	AGCGCGGAGTGACTACTTCT	GGCTACATGCAACCATACTA	AGCGCGGAGTGACTACTTCT	V1B
YNL147W	LSM7	3	D1.2	CATTAAGTCGCATTGATGGG	TATTCGGATCGCCCGGTTGT	CATTAAGTCGCATTGATGGG	TATTCGGATCGCCCGGTTGT	V1B
YOR319W	HSH49	3	D1.2	CCTCGAATACTTGTCAAAGC	CTTATCACTGTATCCGACGT	CCTCGAATACTTGTCAAAGC	CTTATCACTGTATCCGACGT	V1B
YBR188C	NTC20	3	D1.2	ATATCGAGGTAACGCCCGAG	TATTGTTCCGAGCCCTGGGT	ATATCGAGGTAACGCCCGAG	TATTGTTCCGAGCCCTGGGT	V1B
YDR055W	PST1	3	D1.2	CAGAGTGCTTGTAATACTGG	CGGACCCGTTTGTAGAAATT	CAGAGTGCTTGTAATACTGG	CGGACCCGTTTGTAGAAATT	V1B
YLR375W	STP3	3	D1.2	AACATCTCGGAAGAGTGAGC	ATCACTGCGCGAGGATACGT	AACATCTCGGAAGAGTGAGC	ATCACTGCGCGAGGATACGT	V1B
YOR120W	GCY1	3	D1.2	CGCATAAGGGCAAGCATGTA	CACGACGGTTTACAGTTTCT	CGCATAAGGGCAAGCATGTA	CACGACGGTTTACAGTTTCT	V1B
YMR138W	CIN4	3	D1.2	TAGTGGTCAGCATCCCTTGG	AAACTGGCAGGGTCCGAATT	TAGTGGTCAGCATCCCTTGG	AAACTGGCAGGGTCCGAATT	V1B
YLR035C-A	#N/A	3	D1.2	TATACTAGCACAGAGGCCGC	AGTATAGTCCCTGTCACCGT	TATACTAGCACAGAGGCCGC	AGTATAGTCCCTGTCACCGT	V1B
YBR170C	NPL4	3	D1.2	GCACGTAGTACATTCTCTAG	ATCCGCGTGTCCATAGTGGT	GCACGTAGTACATTCTCTAG	ATCCGCGTGTCCATAGTGGT	V1B
YGR081C	SLX9	3	D1.2	AGATTTCCGCAACGTCCTTA	TTGGATCAGCTCCGCGAAGT	AGATTTCCGCAACGTCCTTA	TTGGATCAGCTCCGCGAAGT	V1B
YHR049W	FSH1	3	D1.2	ACGCATAACGCATGATGGGC	GTGGCCTACCTATTATCCGT	ACGCATAACGCATGATGGGC	GTGGCCTACCTATTATCCGT	V1B
YCR095C	OCA4	3	D1.2	TCCGACCAGGAACAGTGAAC	TTGTGGGTCATCCCTCCAGT	TCCGACCAGGAACAGTGAAC	TTGTGGGTCATCCCTCCAGT	V1B
YLR363C	NMD4	3	D1.2	AATTATGACCGACGGCCTGC	ACTATTGCTGTGCAGAGCGT	AATTATGACCGACGGCCTGC	ACTATTGCTGTGCAGAGCGT	V1B
YCL039W	GID7	3	D1.2	GGGACGACATCAATAGCCAC	CCTTCTATTAGGTGGGCAGT	GGGACGACATCAATAGCCAC	CCTTCTATTAGGTGGGCAGT	V1B
YDR256C	CTA1	3	D1.2	CGAGCTTATGAACGATTTGC	AAATTCATGGTCCACGGCGT	CGAGCTTATGAACGATTTGC	AAATTCATGGTCCACGGCGT	V1B
YIL059C	#REF!	3	D1.2	TGTCACACAGTCAATCAGAC	TAGGCAAAGATCAGGTCAGT	TGTCACACAGTCAATCAGAC	TAGGCAAAGATCAGGTCAGT	V1B
YBR067C	TIP1	3	D1.2	CATCACGACTAACTAGGATC	ACCTAGCTTCCAGTTTGCGT	CATCACGACTAACTAGGATC	ACCTAGCTTCCAGTTTGCGT	V1B
YGL050W	TYW3	3	D1.2	AAGCAGTCCGCACTCTGTTG	CGGACCTTCTTATCCAGATT	AAGCAGTCCGCACTCTGTTG	CGGACCTTCTTATCCAGATT	V1B
YKL043W	PHD1	3	D1.2	TTACTACCTACAGCGAGGCG	ATACTACGTTAGGAGGCTGT	NA	NA	V1B
YMR288W	HSH155	3	D1.2	AAGACGTTATCAACTCCGAC	CCTAGTGATGGAGCTTCAGT	AAGACGTTATCAACTCCGAC	CCTAGTGATGGAGCTTCAGT	V1B
YMR169C	ALD3	3	D1.2	TCTATCCGAGTAGCGGGAAT	CAAGCGCGTGTCATACGATT	TCTATCCGAGTAGCGGGAAT	CAAGCGCGTGTCATACGATT	V1B
YOR374W	ALD4	3	D1.2	AGGCGACCCTAAGAGTGCTC	ATTAGTCGCGCCTCAGTCGT	AGGCGACCCTAAGAGTGCTC	ATTAGTCGCGCCTCAGTCGT	V1B
YDR436W	PPZ2	3	D1.2	TGAGGTCTGACACTCCATCG	ATGGCGATGCCCGATTCTGT	TGAGGTCTGACACTCCATCG	ATGGCGATGCCCGATTCTGT	V1B
YER170W	ADK2	3	D1.2	TCCTCGAATATAAAGGAACC	CTTAATAACGGCGATGGAGT	TCCTCGAATATAAAGGAACC	CTTAATAACGGCGATGGAGT	V1B
YJL122W	ALB1	3	D1.2	TTGACTGAGCCACGATGTCG	AGTTGTCTCCGACTCCGTGT	TTGACTGAGCCACGATGTCG	AGTTGTCTCCGACTCCGTGT	V1B
YGL184C	STR3	3	D1.2	TATTCGGAACCAGGTGGACC	GCTTCACTTATCCGCATAGT	TATTCGGAACCAGGTGGACC	GCTTCACTTATCCGCATAGT	V1B
YOR026W	BUB3	3	D1.2	TAGCAGCAAACATTTAGCCC	TCTGTAGTCATACGGCTAGT	TAGCAGCAAACATTTAGCCC	TCTGTAGTCATACGGCTAGT	V1B
YBR225W	#REF!	3	D1.2	TTCGGACAGCAACGAGATGA	ACTGACGGATTGCCAGGTCT	TTCGGACAGCAACGAGATGA	ACTGACGGATTGCCAGGTCT	V1B
YDL110C	TMA17	3	D1.2	AACTGAGCTTCAATCACGCC	ACTCCTAGCGGATCTGTAGT	AACTGAGCTTCAATCACGCC	ACTCCTAGCGGATCTGTAGT	V1B
YOL011W	PLB3	3	D1.2	AGATCGTAACCAGCGAGTCC	ATTCTGAGTCGGAGCCACGT	AGATCGTAACCAGCGAGTCC	ATTCTGAGTCGGAGCCACGT	V1B
YDR198C	RKM2	3	D1.2	TGGGACATTCAACACACCTA	GGTAGGCTCCGTCATCTTCT	TGGGACATTCAACACACCTA	GGTAGGCTCCGTCATCTTCT	V1B
YFL048C	EMP47	3	D1.2	AAGAGCCTTTAATGCCTGGG	GGACCGATTGTCATGGTTGT	AAGAGCCTTTAATGCCTGGG	GGACCGATTGTCATGGTTGT	V1B
YHR036W	BRL1	3	D1.2	CCCGAGACATTTGAAGAAGC	TGATTCACGCTACGCGACGT	CCCGAGACATTTGAAGAAGC	TGATTCACGCTACGCGACGT	V1B
YKL088W	CAB3	3	D1.2	TATCACCGAGCATCAGCGAG	CGCAAACATAGATTGTGGGT	TATCACCGAGCATCAGCGAG	CGCAAACATAGATTGTGGGT	V1B
YPL117C	IDI1	3	D1.2	TGAACCCAGCGCAACGAGTA	TTGCATCGGGCAGTCGTTCT	TGAACCCAGCGCAACGAGTA	TTGCATCGGGCAGTCGTTCT	V1B
YLL021W	SPA2	3	D1.2	TGACGATTCGCATCACCTGG	GCGGCCCTTCTTCATAAATT	ATCACTTACGAGAGGCTGGC	CGGATACCGTGTGCTAAATT	V1B
YMR297W	PRC1	3	D1.2	ACAGCATCGGAACGCATAGC	GGGTATTGACGATGCTACGT	ACAGCATCGGAACGCATAGC	GGGTATTGACGATGCTACGT	V1B
YML046W	PRP39	3	D1.2	ATATCCGATGGCACAGTTGG	ATTTGGAGACGCCGCGAATT	ATATCCGATGGCACAGTTGG	ATTTGGAGACGCCGCGAATT	V1B
YOL031C	SIL1	3	D1.2	CACTCAGCTTGCCGAAGTAG	ATCCTGCGTCAGCTAGTGGT	CACTCAGCTTGCCGAAGTAG	ATCCTGCGTCAGCTAGTGGT	V1B
YLR145W	RMP1	3	D1.2	CGATCAAATAGAATGTGGGC	TTACTCAGGTCAGACTCCGT	CGATCAAATAGAATGTGGGC	TTACTCAGGTCAGACTCCGT	V1B
YLR363W-A	#REF!	3	D1.2	GGGCGCACCGAACTAATAAC	CATGTACCGATGGGTCCAGT	GGGCGCACCGAACTAATAAC	CATGTACCGATGGGTCCAGT	V1B
YMR067C	UBX4	3	D1.2	GCATAACGAGAAGGCTCCAC	CCAAACAACGTGATGGCAGT	GCATAACGAGAAGGCTCCAC	CCAAACAACGTGATGGCAGT	V1B
YML103C	NUP188	3	D1.2	CCGGTCTGGTAAGAGAAATC	CCTATTGGTAGACTCGGCGT	CCGGTCTGGTAAGAGAAATC	CCTATTGGTAGACTCGGCGT	V1B
YDR066C	RTR2	3	D1.2	CCCAGATTATCAACTGAGAC	AAACTTGCGCGACGGTCAGT	CCCAGATTATCAACTGAGAC	AAACTTGCGCGACGGTCAGT	V1B
YIL095W	PRK1	3	D1.2	GATAAGCGACGATATGGATC	ATTCGAGTGGGTTACATCGT	GATAAGCGACGATATGGATC	ATTCGAGTGGGTTACATCGT	V1B
YGR133W	PEX4	3	D1.2	CGGCACCTATAATTTGTGAC	GATCCACCCGACTTGAGAGT	CGGCACCTATAATTTGTGAC	GATCCACCCGACTTGAGAGT	V1B
YJL172W	CPS1	3	D1.2	TCTGCATGGGTGACAATTTG	ACCTCCGGGATGTGCAGATT	TCTGCATGGGTGACAATTTG	ACCTCCGGGATGTGCAGATT	V1B
YBR142W	MAK5	3	D1.2	TACCAGCGGGTGAACTACTC	TATTTACGCGGGAGACTCGT	TACCAGCGGGTGAACTACTC	TATTTACGCGGGAGACTCGT	V1B
YFL046W	FMP32	3	D1.2	TATATTACGGCCACACGGCG	AAAGTGCCCTTCACGGCTGT	TATATTACGGCCACACGGCG	AAAGTGCCCTTCACGGCTGT	V1B
YJR127C	RSF2	3	D1.2	AGTCTAGGACGTTGCTGAAT	CGGGATACTGTCCTACGATT	AGTCTAGGACGTTGCTGAAT	CGGGATACTGTCCTACGATT	V1B
YHR039C-A	VMA10	3	D1.2	GGTATCACCTAATCTTGCTC	TAACCGCTGGTCAGAGTCGT	GGTATCACCTAATCTTGCTC	TAACCGCTGGTCAGAGTCGT	V1B
YKR086W	PRP16	3	D1.2	GCACGGCTTTAACGTCATCG	TTGCGCGACCCGATTTCCGT	GCACGGCTTTAACGTCATCG	TTGCGCGACCCGATTTCCGT	V1B
YGL062W	PYC1	3	D1.2	ACTATCCTACGAGCGGGCAT	CTACCCTGAGCGTGAGGATT	ACTATCCTACGAGCGGGCAT	CTACCCTGAGCGTGAGGATT	V1B
YNL289W	PCL1	3	D1.2	GGACGTACTCTCAAGTGACC	AAACGCTGGTGCATCATAGT	GGACGTACTCTCAAGTGACC	AAACGCTGGTGCATCATAGT	V1B
YMR204C	INP1	3	D1.2	GAGATTGAACCATCAGGCCC	ACGTAATCCTCACTGCTAGT	GAGATTGAACCATCAGGCCC	ACGTAATCCTCACTGCTAGT	V1B
YBL051C	PIN4	3	D1.2	GGGCTGAACACACTATATGA	AATCATCCGTGGGCAGGTCT	GGGCTGAACACACTATATGA	AATCATCCGTGGGCAGGTCT	V1B
YDR065W	RRG1	3	D1.2	CCGCGCACTATACATATTGA	ATAGATTCGCCTCACTGTCT	CCGCGCACTATACATATTGA	ATAGATTCGCCTCACTGTCT	V1B
YDR060W	MAK21	3	D1.2	GCATAACCGGAACGTAATCC	ATGCGACTCTTGACGAACGT	GCATAACCGGAACGTAATCC	ATGCGACTCTTGACGAACGT	V1B
YDL130W-A	STF1	3	D1.2	GCATTTACCCAACGTCGATA	CTGCAACTGATCGTCATTCT	GCATTTACCCAACGTCGATA	CTGCAACTGATCGTCATTCT	V1B
YDR395W	SXM1	3	D1.2	AAAGAGCAGTTCAACCGTCC	TACTGGAGCGTATGCCACGT	AAAGAGCAGTTCAACCGTCC	TACTGGAGCGTATGCCACGT	V1B
YNL093W	YPT53	3	D1.2	ACAGTTGTTGAATCTCTGGG	ACTCGCTGGATAGCTGTTGT	NA	NA	V1B
YGR262C	BUD32	3	D1.2	ATTAACGTGCTGGAATCGAG	CCTACTCTGGGTCATTGGGT	ATTAACGTGCTGGAATCGAG	CCTACTCTGGGTCATTGGGT	V1B
YPL084W	BRO1	3	D1.2	ACATGGACGCAATCCTAGTA	TAACTTGCGGGCACGGTTCT	ACATGGACGCAATCCTAGTA	TAACTTGCGGGCACGGTTCT	V1B
YPL219W	PCL8	3	D1.2	ATGTAGGTCTCCACTCCTGG	CGGCGGCTAGTTGATAAATT	NA	NA	V1B
YDL190C	UFD2	3	D1.2	ACACGGACCTGCATATTGAG	TTATAGCTGGTACGACTGGT	ACACGGACCTGCATATTGAG	TTATAGCTGGTACGACTGGT	V1B
YDR275W	BSC2	3	D1.2	AACTGCGTTAAAGGGCTGTA	GCATCCGTTGCAGCGTTTCT	AACTGCGTTAAAGGGCTGTA	GCATCCGTTGCAGCGTTTCT	V1B
YDR324C	UTP4	3	D1.2	TACACTCGGCCATTGGTTGG	TGTACCTGACTCCTCGAATT	TACACTCGGCCATTGGTTGG	TGTACCTGACTCCTCGAATT	V1B
YBR003W	COQ1	3	D1.2	TATTAGGGACCACTCAGCGC	TTTGCTGTCAGAGCGACCGT	TATTAGGGACCACTCAGCGC	TTTGCTGTCAGAGCGACCGT	V1B
YMR282C	AEP2	3	D1.2	ATTAGCGACGGACCTAGTAG	TATATCGCTAGTGACGTGGT	ATTAGCGACGGACCTAGTAG	TATATCGCTAGTGACGTGGT	V1B
YDR039C	ENA2	3	D1.2	TCGACACAGACACGATCTTC	TACTACTATCGGTGGGAAGT	NA	NA	V1B
YMR073C	IRC21	3	D1.2	AACCACTCTGAATAGATGGC	AAAGAATGGTCATGCTCCGT	AACCACTCTGAATAGATGGC	AAAGAATGGTCATGCTCCGT	V1B
YBR241C	#REF!	3	D1.2	TCGCGGAGAGAATGTATAAC	AGAAGCTAGATGTGTCCAGT	TCGCGGAGAGAATGTATAAC	AGAAGCTAGATGTGTCCAGT	V1B
YPR128C	ANT1	3	D1.2	CAATTAACCTAACGGTGTCC	AGGTTTACCCTCCCGATTGT	CAATTAACCTAACGGTGTCC	AGGTTTACCCTCCCGATTGT	V1B
YFL002C	SPB4	3	D1.2	GATCCTCTAACAGGTTCTGC	ACTATCGGAGTATCGAGCGT	GATCCTCTAACAGGTTCTGC	ACTATCGGAGTATCGAGCGT	V1B
YBR001C	NTH2	3	D1.2	CCGGCAGTAGAAGTAAGCAC	ATGATCGCGTCCCATGCAGT	CCGGCAGTAGAAGTAAGCAC	ATGATCGCGTCCCATGCAGT	V1B
YGL140C	#REF!	3	D1.2	CAGGTGAAGTAACGTGAATC	TTAGTTCTCCTCACGGGCGT	CAGGTGAAGTAACGTGAATC	TTAGTTCTCCTCACGGGCGT	V1B
YOL038W	PRE6	3	D1.2	GCTGGACATACATACACGAC	CAACTCCGAGGGATGTCAGT	GCTGGACATACATACACGAC	CAACTCCGAGGGATGTCAGT	V1B
YER013W	PRP22	3	D1.2	CAGATGCCTGAACTGTGATC	CACTGATCGTTATCCATCGT	CAGATGCCTGAACTGTGATC	CACTGATCGTTATCCATCGT	V1B
YGR129W	SYF2	3	D1.2	ATAGTTGACTCCAGCCAGCG	CTTCGATGGAGTCAGCCTGT	ATAGTTGACTCCAGCCAGCG	CTTCGATGGAGTCAGCCTGT	V1B
YGL145W	TIP20	3	D1.2	TATGTCGTAGCACGGATTTG	GAAACAGGACTGGTCAGATT	TATGTCGTAGCACGGATTTG	GAAACAGGACTGGTCAGATT	V1B
YPR171W	BSP1	3	D1.2	CATGTAGTAGCATTCCGGCG	ACGATAGCCGTTCATGCTGT	CATGTAGTAGCATTCCGGCG	ACGATAGCCGTTCATGCTGT	V1B
YHR023W	MYO1	3	D1.2	CCGGCGAGATTGATGATAAT	TTCGTTGAGACGGCCCGATT	CCGGCGAGATTGATGATAAT	TTCGTTGAGACGGCCCGATT	V1B
YBL101C	ECM21	3	D1.2	TAACGAGGGATAAGGATCTC	TACTTATGCTGAGGAGTCGT	TAACGAGGGATAAGGATCTC	TACTTATGCTGAGGAGTCGT	V1B
YDL171C	GLT1	3	D1.2	CATATTGTGTAACGGGATCG	GAGGCGGATATACTTTCTGT	CATATTGTGTAACGGGATCG	GAGGCGGATATACTTTCTGT	V1B
YNR048W	#REF!	3	D1.2	CCCGTACAGGAATAGTAACC	CTATTCCCTGGACGTGGAGT	CCCGTACAGGAATAGTAACC	CTATTCCCTGGACGTGGAGT	V1B
YJR137C	MET5	3	D1.2	GTAGAGACCGCTAACACGTC	TGAGCTTACCCGATGTTCGT	GTAGAGACCGCTAACACGTC	TGAGCTTACCCGATGTTCGT	V1B
YJR091C	JSN1	3	D1.2	ACCATAGGAGGCATTATTCG	AATTCCTGCTCAGCGCGTGT	ACCATAGGAGGCATTATTCG	AATTCCTGCTCAGCGCGTGT	V1B
YER123W	YCK3	3	D1.2	GGCCACTCATAAGTAATACC	CGGGTACTCTTACTCATAGT	GGCCACTCATAAGTAATACC	CGGGTACTCTTACTCATAGT	V1B
YIR022W	SEC11	3	D1.2	TATTGTGAACCAGGGTGCCC	AGGCGATACTTCGATCTAGT	TATTGTGAACCAGGGTGCCC	AGGCGATACTTCGATCTAGT	V1B
YHR008C	SOD2	3	D1.2	CGGCGCTCGATTCTCATTGT	AATCAGACTTGCAGCTTGGG	CGGCGCTCGATTCTCATTGT	AATCAGACTTGCAGCTTGGG	V1B
YGL013C	PDR1	3	D1.2	GGCCCATACTATCAAACTGA	CGCTTTAGAGTCATAGGTCT	GGCCCATACTATCAAACTGA	CGCTTTAGAGTCATAGGTCT	V1B
YLL003W	SFI1	3	D1.2	TAGGACTGAACAGCATCGCC	CGACCTGTGTAGTCATTAGT	TAGGACTGAACAGCATCGCC	CGACCTGTGTAGTCATTAGT	V1B
YHR063C	PAN5	3	D1.2	ACAGGTTACCAACGCCTTGA	TATACCGGATGGAGCTGTCT	ACAGGTTACCAACGCCTTGA	TATACCGGATGGAGCTGTCT	V1B
YPL067C	#REF!	3	D1.2	TGAGAGCACTAACTACATCC	ATCTTGAGCGGGCCTAACGT	TGAGAGCACTAACTACATCC	ATCTTGAGCGGGCCTAACGT	V1B
YKR066C	CCP1	3	D1.2	CCGGTCAAGGAATTTGGATA	GCAGCAGCGTGTACGATTCT	CCGGTCAAGGAATTTGGATA	GCAGCAGCGTGTACGATTCT	V1B
YGR233C	PHO81	3	D1.2	CCTTATTTAGTAGCAGTGGG	ACGGACCTCTGACGTGTTGT	CCTTATTTAGTAGCAGTGGG	ACGGACCTCTGACGTGTTGT	V1B
YMR308C	PSE1	3	D1.2	GCATGGACATAAGTGTAAGC	CTTTAAGTACGGATGGACGT	GCATGGACATAAGTGTAAGC	CTTTAAGTACGGATGGACGT	V1B
YHR178W	STB5	3	D1.2	CCGGCCATTATTACAACGTA	ATATTACACGGCCCGGTTCT	CCGGCCATTATTACAACGTA	ATATTACACGGCCCGGTTCT	V1B
YNL005C	MRP7	3	D1.2	CACCTCTCGTAAGGGTTGAG	TTTATCGCTCGGCACCTGGT	CACCTCTCGTAAGGGTTGAG	TTTATCGCTCGGCACCTGGT	V1B
YPL263C	KEL3	3	D1.2	GCCTAGAGAACAGCAGTGTA	CTTACTGGGAGACGGTTTCT	GCCTAGAGAACAGCAGTGTA	CTTACTGGGAGACGGTTTCT	V1B
YMR315W	#REF!	3	D1.2	ATAGGTCCGCCACTCTTTGG	CCTAGTGAGTGTCAGGAATT	ATAGGTCCGCCACTCTTTGG	CCTAGTGAGTGTCAGGAATT	V1B
YJR101W	RSM26	3	D1.2	AGCATGACACCAGTTAGCGC	ATTGCGGCTGTCCATACCGT	AGCATGACACCAGTTAGCGC	ATTGCGGCTGTCCATACCGT	V1B
YPL152W	RRD2	3	D1.2	AGATCCTTCTAACGCCGTAG	AATGTCCTCTGCACCGTGGT	AGATCCTTCTAACGCCGTAG	AATGTCCTCTGCACCGTGGT	V1B
YNL051W	COG5	3	D1.2	GCCCTGTTTACAACGTCTTA	TAGTCATTGGGCACTGAAGT	GCCCTGTTTACAACGTCTTA	TAGTCATTGGGCACTGAAGT	V1B
YEL055C	POL5	3	D1.2	TAAGTACCGATAACCCTGGC	ATACTAGGTGTGCAGTCCGT	TAAGTACCGATAACCCTGGC	ATACTAGGTGTGCAGTCCGT	V1B
YOR261C	RPN8	3	D1.2	GCCACCAGAGAAGTGCTAAC	CCGTATCATCTTTCAGCAGT	GCCACCAGAGAAGTGCTAAC	CCGTATCATCTTTCAGCAGT	V1B
YGR072W	UPF3	3	D1.2	CGGTAAGTGGTACGAATTTC	AACCGTGGGTAGATTTCCTT	CGGTAAGTGGTACGAATTTC	AACCGTGGGTAGATTTCCTT	V1B
YPL089C	RLM1	3	D1.2	TATACTCCCACAGGTAGTGC	CTCTTATTAGTAGGGAGCGT	TATACTCCCACAGGTAGTGC	CTCTTATTAGTAGGGAGCGT	V1B
YOR335C	ALA1	3	D1.2	GGACCATCAGAACTTAGCAC	TCTACTTCAGTGAGTGCAGT	GGACCATCAGAACTTAGCAC	TCTACTTCAGTGAGTGCAGT	V1B
YHR165C	PRP8	3	D1.2	CCGGAGCAGTAATAGTAATC	TTACACCTGGGTCATGGCGT	CCGGAGCAGTAATAGTAATC	TTACACCTGGGTCATGGCGT	V1B
YER067W	RGI1	3	D1.2	GCCGAGATTAGAACACCGAC	ATGCCCGATGGCGATTCAGT	GCCGAGATTAGAACACCGAC	ATGCCCGATGGCGATTCAGT	V1B
YPL091W	GLR1	3	D1.2	CCAGCAGCGGAAGGTATATC	GCGGGATTATGTATCATCGT	CCAGCAGCGGAAGGTATATC	GCGGGATTATGTATCATCGT	V1B
YMR066W	SOV1	3	D1.2	CATCACTTAGCAGGAGAGCG	AGCCTATTTACGATGCCTGT	CATCACTTAGCAGGAGAGCG	AGCCTATTTACGATGCCTGT	V1B
YLR137W	RKM5	3	D1.2	GATTAGCCGCCAGTCCTTTG	CGAGCACTGCGCTTCGGATT	GATTAGCCGCCAGTCCTTTG	CGAGCACTGCGCTTCGGATT	V1B
YDR040C	ENA1	3	D1.2	ACATTTGCAGCACTAGGGCG	ACGACCTGTCTCATTGCTGT	ACATTTGCAGCACTAGGGCG	ACGACCTGTCTCATTGCTGT	V1B
YER002W	NOP16	3	D1.2	CCATGCTGAGAACGGTGTAC	TCCCTCTAGGTAGGTCGAGT	CCATGCTGAGAACGGTGTAC	TCCCTCTAGGTAGGTCGAGT	V1B
YPL068C	#REF!	3	D1.2	AATAGGGCCTCCCACGTAAT	TGCATTAGACGCTCCCGATT	AATAGGGCCTCCCACGTAAT	TGCATTAGACGCTCCCGATT	V1B
YDL189W	RBS1	3	D1.2	AAGTGAGCCTAACTACTCTC	ATCTTCAGCGGCCTAGTCGT	AAGTGAGCCTAACTACTCTC	ATCTTCAGCGGCCTAGTCGT	V1B
YOR195W	SLK19	3	D1.2	AGGTGCCTACCACTGTATCG	TTGGCACGCTTGTCCAGTGT	AGGTGCCTACCACTGTATCG	TTGGCACGCTTGTCCAGTGT	V1B
YMR110C	HFD1	3	D1.2	TGATGAACGGAACGCACACC	ATCACGTAGGTCATTGGAGT	TGATGAACGGAACGCACACC	ATCACGTAGGTCATTGGAGT	V1B
YOR157C	PUP1	3	D1.2	AGGTGGTCACTCCCTATCAT	AGCTCAGCCGGATACGGATT	AGGTGGTCACTCCCTATCAT	AGCTCAGCCGGATACGGATT	V1B
YLR102C	APC9	3	D1.2	TAGTGAGCTACAGCACCGTC	CCGCGATCTGTGCATTTCGT	TAGTGAGCTACAGCACCGTC	CCGCGATCTGTGCATTTCGT	V1B
YNL322C	KRE1	3	D1.2	TTACGTGCGACACTGCTTCG	CGACGGTTCTCATATCGTGT	TTACGTGCGACACTGCTTCG	CGACGGTTCTCATATCGTGT	V1B
YPL030W	TRM44	3	D1.2	ACATCACGCGAAGTTATACC	CTCCCGGATCGGTAGATAGT	ACATCACGCGAAGTTATACC	CTCCCGGATCGGTAGATAGT	V1B
YCR076C	FUB1	3	D1.2	ATTGGAGGAACAGGCATCCC	ACCTCAGCCGTATATCTAGT	ATTGGAGGAACAGGCATCCC	ACCTCAGCCGTATATCTAGT	V1B
YNL029C	KTR5	3	D1.2	CTCAAGAGCGGCTATATTGT	CACAGCTCTCTACATTTGGG	CTCAAGAGCGGCTATATTGT	CACAGCTCTCTACATTTGGG	V1B
YLR290C	#REF!	3	D1.2	GCCTTAGTACAACTCACTGA	ATGATTTCGCCCGACGGTCT	GCCTTAGTACAACTCACTGA	ATGATTTCGCCCGACGGTCT	V1B
YDR511W	ACN9	3	D1.2	CCATCTGCAATACGTCGTTA	GTCCAGATGACAGAAGCCAC	CCATCTGCAATACGTCGTTA	GTCCAGATGACAGAAGCCAC	V1B
YNL277W	MET2	3	D1.2	TCCGACTAAATAATAAGGCC	AGTCTCCATACCCGATTAGT	TCCGACTAAATAATAAGGCC	AGTCTCCATACCCGATTAGT	V1B
YGR280C	PXR1	3	D1.2	CCGAATAGTGCATAAGATCC	GCTACGAGTCTTTCTAACGT	CCGAATAGTGCATAAGATCC	GCTACGAGTCTTTCTAACGT	V1B
YOL022C	TSR4	3	D1.2	GCCGCAGCTATATCAACATA	TATCGAGAGCGGGTAATTCT	GCCGCAGCTATATCAACATA	TATCGAGAGCGGGTAATTCT	V1B
YGL035C	MIG1	3	D1.2	GCCAAATAAACATTCGGTCC	CTCATGCAGCTATGGCACGT	GCCAAATAAACATTCGGTCC	CTCATGCAGCTATGGCACGT	V1B
YML022W	APT1	3	D1.2	GCTTATCCCTAATGCTTCAG	TATAGCCTTAGACTCCGGGT	GCTTATCCCTAATGCTTCAG	TATAGCCTTAGACTCCGGGT	V1B
YPL146C	NOP53	3	D1.2	AACAGGCTCCAATGACGCTA	ATTCGTGACGCGACTCTTCT	AACAGGCTCCAATGACGCTA	ATTCGTGACGCGACTCTTCT	V1B
YLL054C	#REF!	3	D1.2	AATCTATCGTACCCGGTGGG	AGCGGGACTGTTCCATTTGT	AATCTATCGTACCCGGTGGG	AGCGGGACTGTTCCATTTGT	V1B
YPL151C	PRP46	3	D1.2	GTATGACACTACCAGACAGC	ATTATGACGGTCGATGACGT	GTATGACACTACCAGACAGC	ATTATGACGGTCGATGACGT	V1B
YPR103W	PRE2	3	D1.2	TACTCACGAGCAGTCAGGAG	ACCGTCTTATGAGTTTGGGT	TACTCACGAGCAGTCAGGAG	ACCGTCTTATGAGTTTGGGT	V1B
YPR176C	BET2	3	D1.2	GGACCCATAACAGTACCGTA	GACCGTCGTATCAGGGTTCT	GGACCCATAACAGTACCGTA	GACCGTCGTATCAGGGTTCT	V1B
YKL081W	TEF4	3	D1.2	CAAGGAGTTGTAATCTCTGG	GCTCCGAGGTTTCGTAAATT	CAAGGAGTTGTAATCTCTGG	GCTCCGAGGTTTCGTAAATT	V1B
YGL019W	CKB1	3	D1.2	GGACGTAATACAGTGTTAGC	TCCTAGTTTCGCAGGTACGT	GGACGTAATACAGTGTTAGC	TCCTAGTTTCGCAGGTACGT	V1B
YLR220W	CCC1	3	D1.2	CCTGTAAGGTGACTGAATAG	TTATCTGACCTCGCGCTGGT	CCTGTAAGGTGACTGAATAG	TTATCTGACCTCGCGCTGGT	V1B
YOR108W	LEU9	3	D1.2	CGCGACCTTTACATCAAATG	CGACTCTAGTTCACGGAATT	CGCGACCTTTACATCAAATG	CGACTCTAGTTCACGGAATT	V1B
YHL002W	HSE1	3	D1.2	AAGCTCGATGAACTTCGCGC	ATTATTGGCGGACGTACCGT	AAGCTCGATGAACTTCGCGC	ATTATTGGCGGACGTACCGT	V1B
YNL175C	NOP13	3	D1.2	CCGGTATGCTAATATCGTAG	CCTATCCTATGAGGCGTGGT	CCGGTATGCTAATATCGTAG	CCTATCCTATGAGGCGTGGT	V1B
YGR214W	RPS0A	3	D1.2	GATTCCATGCAACCCAGTTA	CACGACCTGATGCCATAAGT	GATTCCATGCAACCCAGTTA	CACGACCTGATGCCATAAGT	V1B
YBR238C	#REF!	3	D1.2	ATGAGACCCTACACAGTGGC	TTATGTCCGAGAGCGTCCGT	ATGAGACCCTACACAGTGGC	TTATGTCCGAGAGCGTCCGT	V1B
YLR079W	SIC1	3	D1.2	AAAGCTGGATGAACTCGTGC	TATCCGTGTCGCCATAGCGT	AAAGCTGGATGAACTCGTGC	TATCCGTGTCGCCATAGCGT	V1B
YPR010C	RPA135	3	D1.2	AAATAGCCTGGCAAGGGCAC	ATTTGGCCTACCCGTGCAGT	AAATAGCCTGGCAAGGGCAC	ATTTGGCCTACCCGTGCAGT	V1B
YKL117W	SBA1	3	D1.2	CGCCAGAGCGTAATTTAATC	CAACTAGGTCTCATTGGCGT	CGCCAGAGCGTAATTTAATC	CAACTAGGTCTCATTGGCGT	V1B
YER122C	GLO3	3	D1.2	TATCTGATCCCATCGGAGCG	TAGCGTTAGCGACTGCCTGT	TATCTGATCCCATCGGAGCG	TAGCGTTAGCGACTGCCTGT	V1B
YOR043W	WHI2	3	D1.2	ACTGGAACGGAATCCCATAC	ATCCCAACTAGCGGTAGAGT	ACTGGAACGGAATCCCATAC	ATCCCAACTAGCGGTAGAGT	V1B
YBR065C	ECM2	3	D1.2	ACTTAGGTACGACGAGTTTG	CACCCGTCGATTTAGAGATT	ACTTAGGTACGACGAGTTTG	CACCCGTCGATTTAGAGATT	V1B
YHR159W	TDA11	3	D1.2	AATGGGATCTCATAACCCTC	GCGGATCTTATAGACCTCGT	AATGGGATCTCATAACCCTC	GCGGATCTTATAGACCTCGT	V1B
YJL210W	PEX2	3	D1.2	TATACTACCGCAGACTGGCG	AAAGCGACTGTGGCATCTGT	TATACTACCGCAGACTGGCG	AAAGCGACTGTGGCATCTGT	V1B
YJR134C	SGM1	3	D1.2	CCGGCCAGATTAAGAATTAC	CTAGTAGGTTGCATTCGAGT	CCGGCCAGATTAAGAATTAC	CTAGTAGGTTGCATTCGAGT	V1B
YLR287C-A	RPS30A	3	D1.2	ACCACGGCACTCAGGTTAAT	GTACCGTAGCGTATCCGATT	ACCACGGCACTCAGGTTAAT	GTACCGTAGCGTATCCGATT	V1B
YML075C	HMG1	3	D1.2	GATCTACTGACACTGACTCG	CTATTACGTGGAGTCAGTGT	GATCTACTGACACTGACTCG	CTATTACGTGGAGTCAGTGT	V1B
YDL216C	RRI1	3	D1.2	TAAAGTTAGCTCAAGCCACC	TCTGACCCGATAGTTGGAGT	TAAAGTTAGCTCAAGCCACC	TCTGACCCGATAGTTGGAGT	V1B
YDL175C	AIR2	3	D1.2	TAGGTAGTTACAGGGCTCAT	ATTTCGCACTCGACCGGATT	TAGGTAGTTACAGGGCTCAT	ATTTCGCACTCGACCGGATT	V1B
YGR194C	XKS1	3	D1.2	AGAGTGTTTCCACATCCGTC	CTCTCGGAGTGACGTTTCGT	AGAGTGTTTCCACATCCGTC	CTCTCGGAGTGACGTTTCGT	V1B
YBR168W	PEX32	3	D1.2	GGCACCTTACCAGTAGTTCG	AGGTCACTTATAGCTCGTGT	GGCACCTTACCAGTAGTTCG	AGGTCACTTATAGCTCGTGT	V1B
YMR222C	FSH2	3	D1.2	AGATTAGAGACACCGCTACC	CTACTTGAGTGACGGATAGT	AGATTAGAGACACCGCTACC	CTACTTGAGTGACGGATAGT	V1B
YLR336C	SGD1	3	D1.2	GAATATAGAGCACGACTTCC	CATGACGATTGTCCAGTAGT	GAATATAGAGCACGACTTCC	CATGACGATTGTCCAGTAGT	V1B
YOR193W	PEX27	3	D1.2	ATCGAGGGACGAGTCTTCAT	ATTCGATCTTCACGACGGCT	ATCGAGGGACGAGTCTTCAT	ATTCGATCTTCACGACGGCT	V1B
YPL014W	#REF!	3	D1.2	GAAGTCTCAACATACCCTGA	TAGGTCATCCTCAGCGGTCT	GAAGTCTCAACATACCCTGA	TAGGTCATCCTCAGCGGTCT	V1B
YPL103C	FMP30	3	D1.2	GCCCAGCTTAAATCAGATCA	CTCTAGGCTCGATAGTGAGT	GCCCAGCTTAAATCAGATCA	CTCTAGGCTCGATAGTGAGT	V1B
YPL141C	FRK1	3	D1.2	TAACGATAAGCATGGAGGCC	ACCGCTTCAGTAGGATTAGT	TAACGATAAGCATGGAGGCC	ACCGCTTCAGTAGGATTAGT	V1B
YER103W	SSA4	3	D1.2	AGAACCACTCCCAATGTTGA	TAACCGCTCGTCATGTGTCT	AGAACCACTCCCAATGTTGA	TAACCGCTCGTCATGTGTCT	V1B
YJR022W	LSM8	3	D1.2	TAAGGAGCCATAACCTATCC	TGTTCCAGGCTCCGTAACGT	TAAGGAGCCATAACCTATCC	TGTTCCAGGCTCCGTAACGT	V1B
YKL164C	PIR1	3	D1.2	GGATTTCACACATGCTGTCC	GTCGAGACTTGCTATCACGT	GGATTTCACACATGCTGTCC	GTCGAGACTTGCTATCACGT	V1B
YBR290W	BSD2	3	D1.2	TCCACCATAGGGAGTAAGAG	CTAGATATTAGACTGCGGGT	TCCACCATAGGGAGTAAGAG	CTAGATATTAGACTGCGGGT	V1B
YGL220W	FRA2	3	D1.2	CAATGAGTGCCAAGAGGCTA	GCGGGATTCAGACCTCTTCT	CAATGAGTGCCAAGAGGCTA	GCGGGATTCAGACCTCTTCT	V1B
YFR017C	IGD1	3	D1.2	CCGCACTTAGCATTATTGGG	ACGACGGCTTCCTCATTTGT	CCGCACTTAGCATTATTGGG	ACGACGGCTTCCTCATTTGT	V1B
YBL001C	ECM15	3	D1.2	GAGACGGAGACATTACCAGC	TGATCGCTGCTCACTGACGT	GAGACGGAGACATTACCAGC	TGATCGCTGCTCACTGACGT	V1B
YKR078W	#REF!	3	D1.2	ACCATCGTAGTAAGTAGGAG	CTCCTACGTGGTGACATGGT	ACCATCGTAGTAAGTAGGAG	CTCCTACGTGGTGACATGGT	V1B
YLR165C	PUS5	3	D1.2	AATTGATCGCAACGAGCGTA	GGACGATTTCGACGTGTTCT	AATTGATCGCAACGAGCGTA	GGACGATTTCGACGTGTTCT	V1B
YDR302W	GPI11	3	D1.2	TACTTCATCGCAGGTTCTGG	CCGGCGGACTTTGTTAAATT	TACTTCATCGCAGGTTCTGG	CCGGCGGACTTTGTTAAATT	V1B
YDR123C	INO2	3	D1.2	GAGTACATTACAGCACACGC	TCACTGGTTGCATGGTACGT	GAGTACATTACAGCACACGC	TCACTGGTTGCATGGTACGT	V1B
YIL127C	RRT14	3	D1.2	ACGCACTGCTAATGCCATAG	CAAATACAATGAGGGCTGGT	ACGCACTGCTAATGCCATAG	CAAATACAATGAGGGCTGGT	V1B
YDR073W	SNF11	3	D1.2	CCGAACGAGGAACACTTGTA	CGACGGAGTTTGACTAAAAT	CCGAACGAGGAACACTTGTA	CGACGGAGTTTGACTAAAAT	V1B
YDR323C	PEP7	3	D1.2	CAGACGACTATCGCATAATG	CACTGCGATTGTAGGGAATT	CAGACGACTATCGCATAATG	CACTGCGATTGTAGGGAATT	V1B
YIL065C	FIS1	3	D1.2	ATTATACGACCACAGGGCGC	GTTACGACCCTATGTACCGT	ATTATACGACCACAGGGCGC	GTTACGACCCTATGTACCGT	V1B
YFR003C	YPI1	3	D1.2	CCACTAATGCAATGCCGTTA	CACCGCGAGTTCTACTAAGT	CCACTAATGCAATGCCGTTA	CACCGCGAGTTCTACTAAGT	V1B
YER101C	AST2	3	D1.2	TACACGGGCCTAATTGTGGC	CGACCTTATTCAGATTCCGT	TACACGGGCCTAATTGTGGC	CGACCTTATTCAGATTCCGT	V1B
YNL109W	#REF!	3	D1.2	CAGCTTCAAGAACGCTTAAC	CAACCGGGAGTCATAGCAGT	CAGCTTCAAGAACGCTTAAC	AACCGGGGAGTCATAGCAGT	V1B
YOR283W	#REF!	3	D1.2	CCCGATGTTTAACGTATAGG	GGACGCCACAACGTACTTAA	CCCGATGTTTAACGTATAGG	GGACGCCACAACGTACTTAA	V1B
YIR005W	IST3	3	D1.2	ATACACTTTGAAGGCGGTGC	AACCTTGAGTCATCTAGCGT	ATACACTTTGAAGGCGGTGC	AACCTTGAGTCATCTAGCGT	V1B
YPL150W	#REF!	3	D1.2	GCGGACAGCGAACTAATCAC	CTATCTGGCGGCATTGCAGT	GCGGACAGCGAACTAATCAC	CTATCTGGCGGCATTGCAGT	V1B
YGL248W	PDE1	3	D1.2	CCATAACTAGAATCGGCGAC	TATAGCTCGGGACGTTCAGT	CCATAACTAGAATCGGCGAC	TATAGCTCGGGACGTTCAGT	V1B
YKL078W	DHR2	3	D1.2	CAGACACCGTCATAAGTATC	ACCGTCGTAGGACTGATCGT	CAGACACCGTCATAAGTATC	ACCGTCGTAGGACTGATCGT	V1B
YDR222W	#REF!	3	D1.2	TGATTCCATCCACGATAGCG	ACCTACGCTTAGATTCCTGT	TGATTCCATCCACGATAGCG	ACCTACGCTTAGATTCCTGT	V1B
YPR047W	MSF1	3	D1.2	CCCGGCATAGTAACAGATAC	GATCATTGCATCCGACGAGT	CCCGGCATAGTAACAGATAC	GATCATTGCATCCGACGAGT	V1B
YNL241C	ZWF1	3	D1.2	CTCCAGCGTGCATGTGTTTG	TTGCTGCTCAGGCCGAGATT	CTCCAGCGTGCATGTGTTTG	TTGCTGCTCAGGCCGAGATT	V1B
YGR130C	#REF!	3	D1.2	GTTAAGGCTACATATCCCTC	TTTAGTGCCGGACTCCTCGT	GTTAAGGCTACATATCCCTC	TTTAGTGCCGGACTCCTCGT	V1B
YKL085W	MDH1	3	D1.2	CCAAACAATTAAGGGTGGCG	CACTACGATTGCTCATCTGT	CCAAACAATTAAGGGTGGCG	CACTACGATTGCTCATCTGT	V1B
YPR119W	CLB2	3	D1.2	CCATTGTAGCAAGGGCTTTA	ACTTGTCACCCTGATACAGT	CCATTGTAGCAAGGGCTTTA	ACTTGTCACCCTGATACAGT	V1B
YMR098C	ATP25	3	D1.2	TATACCTGAGGAGGGCACAT	ATACGTCACTCGGAGCGATT	TATACCTGAGGAGGGCACAT	ATACGTCACTCGGAGCGATT	V1B
YIL078W	THS1	3	D1.2	CAAGTAGTCGGAATAGTCTC	TGTCGATCCCTAGCTGTCGT	CAAGTAGTCGGAATAGTCTC	TGTCGATCCCTAGCTGTCGT	V1B
YLR325C	RPL38	3	D1.2	TATAGGCGATCAGACCCTCG	AATTCTGGAGGCTTCAGTGT	TATAGGCGATCAGACCCTCG	AATTCTGGAGGCTTCAGTGT	V1B
YGR278W	CWC22	3	D1.2	TATATGACCACAGAGGCACC	CCGAGGCTTTATAGATGAGT	TATATGACCACAGAGGCACC	CCGAGGCTTTATAGATGAGT	V1B
YJL167W	ERG20	3	D1.2	TTTATGGGCCGCACCGTCAT	CAATGGCTAGGACCCGGATT	TTTATGGGCCGCACCGTCAT	CAATGGCTAGGACCCGGATT	V1B
YML067C	ERV41	3	D1.2	TATAGGCTCACATGCGCGTC	GACCGTATTTGCCATAAGGT	TATAGGCTCACATGCGCGTC	GACCGTATTTGCCATAAGGT	V1B
YER183C	FAU1	3	D1.2	ATTATAGGACGAGCTGTTCG	AATCCTAGTTTGGCAGGTGT	ATTATAGGACGAGCTGTTCG	AATCCTAGTTTGGCAGGTGT	V1B
YLR387C	REH1	3	D1.2	CCCTAAGCATAAGTTGTACC	ATACGGTCTGGCATGATAGT	CCCTAAGCATAAGTTGTACC	ATACGGTCTGGCATGATAGT	V1B
YOR285W	RDL1	3	D1.2	AAGTTACGTCAAGGCGTCCC	AACTTCTTCGGGAGAGTAGT	AAGTTACGTCAAGGCGTCCC	AACTTCTTCGGGAGAGTAGT	V1B
YDR124W	#REF!	3	D1.2	GAACGAGCAACAGTCGCTGA	ATGATCGTGGCACTCGGTCT	GAACGAGCAACAGTCGCTGA	ATGATCGTGGCACTCGGTCT	V1B
YLR447C	VMA6	3	D1.2	ATATTGACACCAGAGCGGCC	GGCGACTCAGCCCTATTAGT	ATATTGACACCAGAGCGGCC	GGCGACTCAGCCCTATTAGT	V1B
YNL315C	ATP11	3	D1.2	TGCACACACAGCAACTTTGA	ATCCGCGTCTCAGTGTGTCT	NA	NA	V1B
YDR478W	SNM1	3	D1.2	GCTAACCTCCAAGCAGTATA	GCAGCCGTACCGATGATTCT	GCTAACCTCCAAGCAGTATA	GCAGCCGTACCGATGATTCT	V1B
YHR195W	NVJ1	3	D1.2	CACTGAGGCGAAGTTTGTCC	TATTAGTGGCCCGCTCACGT	CACTGAGGCGAAGTTTGTCC	TATTAGTGGCCCGCTCACGT	V1B
YLR264W	RPS28B	3	D1.2	ATTGGCATCCCAGTCCAGAG	ACTCCTGAGCTAGATCGGGT	ATTGGCATCCCAGTCCAGAG	ACTCCTGAGCTAGATCGGGT	V1B
YDR061W	#REF!	3	D1.2	CACAGGTTTACAACTGGCTA	TAGGCTACCCGAGGTCTTCT	CACAGGTTTACAACTGGCTA	TAGGCTACCCGAGGTCTTCT	V1B
YPR108W	RPN7	3	D1.2	GACTCACTGCCATTCTTGGG	CCCGCGTTAGGATGATTTGT	GACTCACTGCCATTCTTGGG	CCCGCGTTAGGATGATTTGT	V1B
YGR292W	MAL12	3	D1.2	AGCACTATTTCAAGTCCAGC	ATGATAACGATCCCTGACGT	AGCACTATTTCAAGTCCAGC	ATGATAACGATCCCTGACGT	V1B
YOR039W	CKB2	3	D1.2	ACACCTTAGTAATGGCGGAG	TATCCCGTGCGGTACATGGT	ACACCTTAGTAATGGCGGAG	TATCCCGTGCGGTACATGGT	V1B
YOL052C	SPE2	3	D1.2	GGCATAGGAACATAGTCGTA	AAAGCCGGTTGCATTGTTCT	GGCATAGGAACATAGTCGTA	AAAGCCGGTTGCATTGTTCT	V1B
YKR024C	DBP7	3	D1.2	ACTTATAGGGAAGGTCACGC	AACGGGAGATTAGCTTACGT	ACTTATAGGGAAGGTCACGC	AACGGGAGATTAGCTTACGT	V1B
YNR043W	MVD1	3	D1.2	GCGCATCGTACATTAGATAG	TCCGACGGTTGACATCTGGT	GCGCATCGTACATTAGATAG	TCCGACGGTTGACATCTGGT	V1B
YPR022C	#REF!	3	D1.2	CCCGACCATGTAAGCAATTA	AGGGCTCAGTTTGCTAAAGT	CCCGACCATGTAAGCAATTA	AGGGCTCAGTTTGCTAAAGT	V1B
YGR279C	SCW4	3	D1.2	ATCTGCCCAGGGATGACATG	GTACCTCCGTTCCATGAATT	ATCTGCCCAGGGATGACATG	GTACCTCCGTTCCATGAATT	V1B
YBL063W	KIP1	3	D1.2	GACAGTTGAATAACCTGCGC	CGATGTACATTCATTACCGT	GACAGTTGAATAACCTGCGC	CGATGTACATTCATTACCGT	V1B
YBR286W	APE3	3	D1.2	CATTACGGGCAACTTCGTTA	AAATGCTCAGTGCCGTAAGT	CATTACGGGCAACTTCGTTA	AAATGCTCAGTGCCGTAAGT	V1B
YHR186C	KOG1	3	D1.2	TTGGAGCACATACCGAACAC	ATCCCTGAGTGGTTAGCAGT	TTGGAGCACATACCGAACAC	ATCCCTGAGTGGTTAGCAGT	V1B
YPL052W	OAZ1	3	D1.2	CAGCCTTGAACATCTGGTGC	TTACGGCTGCTCAGTAGCGT	CAGCCTTGAACATCTGGTGC	TTACGGCTGCTCAGTAGCGT	V1B
YHR132C	ECM14	3	D1.2	CGGCTAGAAGACTATATCAC	TTTGTACGCCGGGCATCAGT	CGGCTAGAAGACTATATCAC	TTTGTACGCCGGGCATCAGT	V1B
YMR259C	TRM732	3	D1.2	GGCTGTAACTAACTTCCATC	CAAGGCTACGTGATATGCGT	GGCTGTAACTAACTTCCATC	CAAGGCTACGTGATATGCGT	V1B
YER139C	RTR1	3	D1.2	AAATACTGGGCAACCTCGAC	ATTTATCGCGCCCGCAGAGT	AAATACTGGGCAACCTCGAC	ATTTATCGCGCCCGCAGAGT	V1B
YDR335W	MSN5	3	D1.2	ACATTCGAGGCATCGGTATC	ACCGTTTGTGCAGCTATCGT	ACATTCGAGGCATCGGTATC	ACCGTTTGTGCAGCTATCGT	V1B
YJL212C	OPT1	3	D1.2	ACTAGCAGGTTAAGTTAGCG	TTTCAGGGCTTACGAGCTGT	ACTAGCAGGTTAAGTTAGCG	TTTCAGGGCTTACGAGCTGT	V1B
YBL095W	#REF!	3	D1.2	GCGCAGATGGTAGAATATAC	CGGGCTTATGATATACGAGT	GCGCAGATGGTAGAATATAC	CGGGCTTATGATATACGAGT	V1B
YNL316C	PHA2	3	D1.2	CGGCTCAGTATTCACGAAAT	GCTTCCGAGGTTATGAGATT	CGGCTCAGTATTCACGAAAT	GCTTCCGAGGTTATGAGATT	V1B
YKR052C	MRS4	3	D1.2	CCATTCGTGTAAGAGATGCG	CTGACTTGACTCGACTCTGT	CCATTCGTGTAAGAGATGCG	CTGACTTGACTCGACTCTGT	V1B
YLR212C	TUB4	3	D1.2	GGACACGAGACACATCTTAC	TTCACCTTAGGCCGAGGAGT	GGACACGAGACACATCTTAC	TTCACCTTAGGCCGAGGAGT	V1B
YMR006C	PLB2	3	D1.2	CAAGCTAGAGGAGTTGACAT	ATGCGATACGGTTAGCGATT	CAAGCTAGAGGAGTTGACAT	ATGCGATACGGTTAGCGATT	V1B
YNL313C	EMW1	3	D1.2	TAGCAGGACCCATGTGTCTC	TTTGACCCGCTACGTGTCGT	TAGCAGGACCCATGTGTCTC	TTTGACCCGCTACGTGTCGT	V1B
YBR002C	RER2	3	D1.2	CATACGCAGGAAGGATCACC	ATCTAGCCTGACGGATGAGT	CATACGCAGGAAGGATCACC	ATCTAGCCTGACGGATGAGT	V1B
YBR082C	UBC4	3	D1.2	GCGAGGGTATCATTTGTCAT	CTTACTCGGATGAGCGGATT	GCGAGGGTATCATTTGTCAT	CTTACTCGGATGAGCGGATT	V1B
YOR269W	PAC1	3	D1.2	GAGACTATACGACATGCGTC	ACTTCCACGGGTGTTAAGGT	GAGACTATACGACATGCGTC	ACTTCCACGGGTGTTAAGGT	V1B
YNL152W	INN1	3	D1.2	GAGATCGGTACATAGTTTCG	CAACTTAGCTTGAGAGGTGT	GAGATCGGTACATAGTTTCG	CAACTTAGCTTGAGAGGTGT	V1B
YDR368W	YPR1	3	D1.2	CCTGAGGTACAATCATCTGA	TGACAAAGAAGAGTCGGTCT	CCTGAGGTACAATCATCTGA	TGACAAAGAAGAGTCGGTCT	V1B
YLR330W	CHS5	3	D1.2	GGACATACCACATTAGGGCC	TAGTGACCCTTCAGCTTAGT	GGACATACCACATTAGGGCC	TAGTGACCCTTCAGCTTAGT	V1B
YHR043C	DOG2	3	D1.2	CCTCGGCCTGAATAGAAATA	AAGGCGCTCTCTCATTGTCT	CCTCGGCCTGAATAGAAATA	AAGGCGCTCTCTCATTGTCT	V1B
YHR174W	ENO2	3	D1.2	AGATGAGGACCATGCACTCC	GGGTATTCATCCTCACACGT	AGATGAGGACCATGCACTCC	GGGTATTCATCCTCACACGT	V1B
YNL197C	WHI3	3	D1.2	GGACTAACGCACTATATTCC	GACTATGAGCGATGTCACGT	GGACTAACGCACTATATTCC	GACTATGAGCGATGTCACGT	V1B
YNL272C	SEC2	3	D1.2	GCGCGATCATAACACATCTA	AAAGCAGGGTTGCCAGTTCT	GCGCGATCATAACACATCTA	AAAGCAGGGTTGCCAGTTCT	V1B
YNR046W	TRM112	3	D1.2	TCCATTTCGCCAGGTTTGGG	ACCCGTAGCTGGATATTTGT	TCCATTTCGCCAGGTTTGGG	ACCCGTAGCTGGATATTTGT	V1B
YDR390C	UBA2	3	D1.2	AATCTGTGGCAATGTGCAGC	TATCGGACTGACCGTGACGT	AATCTGTGGCAATGTGCAGC	TATCGGACTGACCGTGACGT	V1B
YMR195W	ICY1	3	D1.2	CATATCGGTTCACACGGGAG	TTTCACGGTGTCAGCATGGT	CATATCGGTTCACACGGGAG	TTTCACGGTGTCAGCATGGT	V1B
YGL212W	VAM7	3	D1.2	TGATCCCTATCCAGTCGTGG	GATCCAACTGTCGGGCAATT	TGATCCCTATCCAGTCGTGG	GATCCAACTGTCGGGCAATT	V1B
YGR060W	ERG25	3	D1.2	TAATATCGCCGGAACGACGC	ACAGGAATGGACCGTTACGT	TAATATCGCCGGAACGACGC	ACAGGAATGGACCGTTACGT	V1B
YJR003C	#REF!	3	D1.2	CAGACGATCCTACATGATAG	GATTCCGCTCCATATCTGGT	CAGACGATCCTACATGATAG	GATTCCGCTCCATATCTGGT	V1B
YPL101W	ELP4	3	D1.2	GCGTCAACTCAATCGCATTA	CGCGCTATGTTGTCTAAAGT	GCGTCAACTCAATCGCATTA	CGCGCTATGTTGTCTAAAGT	V1B
YDR492W	IZH1	3	D1.2	TTTATTGGCCGCAGCCCATG	AAACCCGATGTCGCCTAATT	NA	NA	V1B
YOR342C	#REF!	3	D1.2	GACTAATACCCATGAATCGC	TGGGATCTCGTTACACCCGT	GACTAATACCCATGAATCGC	TGGGATCTCGTTACACCCGT	V1B
YHR194W	MDM31	3	D1.2	CTATATTCGCAAGCCGGTTA	TTAGGTGTCCGACCCACAGT	CTATATTCGCAAGCCGGTTA	TTAGGTGTCCGACCCACAGT	V1B
YPL038W	MET31	3	D1.2	TACCGACAGCGGATGAATGC	ACTGTAATGCGAGCTTCCGT	TACCGACAGCGGATGAATGC	ACTGTAATGCGAGCTTCCGT	V1B
YGR094W	VAS1	3	D1.2	CCTGATCCAGAATGTAACAC	TTTATCCGGGTGACCGCAGT	CCTGATCCAGAATGTAACAC	TTTATCCGGGTGACCGCAGT	V1B
YNL310C	ZIM17	3	D1.2	ACAGCCATTGAACGGTGTGC	TGATCCTACCTACTTAGCGT	ACAGCCATTGAACGGTGTGC	TGATCCTACCTACTTAGCGT	V1B
YJR112W	NNF1	3	D1.2	AATGAAGCAGACGCGCTCAC	ATCCACTAGGTGTCATCAGT	AATGAAGCAGACGCGCTCAC	ATCCACTAGGTGTCATCAGT	V1B
YHR163W	SOL3	3	D1.2	CCTGACGTAGAATAGAGGAC	ACAGGTCAGTCTTGCAGAGT	CCTGACGTAGAATAGAGGAC	ACAGGTCAGTCTTGCAGAGT	V1B
YNL157W	IGO1	3	D1.2	AGAGAGCCAGCACACTTATC	CGGTACTACTGATCTATCGT	AGAGAGCCAGCACACTTATC	CGGTACTACTGATCTATCGT	V1B
YLR150W	STM1	3	D1.2	CCGGACATGGAACTAACTAC	TACTTGTCAGGGCTACGAGT	CCGGACATGGAACTAACTAC	TACTTGTCAGGGCTACGAGT	V1B
YFL041W	FET5	3	D1.2	ATTACGGCAGTGGTGACAAT	GACCGGCTTGTAGATAGATT	ATTACGGCAGTGGTGACAAT	GACCGGCTTGTAGATAGATT	V1B
YHR138C	#REF!	3	D1.2	TATGATACCAGAGACTCCTC	ATTTGCGCTCGACCGCTCGT	TATGATACCAGAGACTCCTC	ATTTGCGCTCGACCGCTCGT	V1B
YPL249C-A	RPL36B	3	D1.2	GCTAGTCACGAATAGGTTAC	CATTCTATGAGGCTAGGAGT	GCTAGTCACGAATAGGTTAC	CATTCTATGAGGCTAGGAGT	V1B
YEL016C	NPP2	3	D1.2	CACGGTCCATTAGATTACAT	TTTCTCTGCCGGAGGCGATT	CACGGTCCATTAGATTACAT	TTTCTCTGCCGGAGGCGATT	V1B
YKL056C	TMA19	3	D1.2	TACTCAGGGACAGTCTTCTC	GCGCGTACTGTCATATTCGT	TACTCAGGGACAGTCTTCTC	GCGCGTACTGTCATATTCGT	V1B
YLR427W	MAG2	3	D1.2	GGACCTAACTAATTGTCACC	AGGATACCTCGCCACTGAGT	GGACCTAACTAATTGTCACC	AGGATACCTCGCCACTGAGT	V1B
YNR047W	FPK1	3	D1.2	ACGACCGGAGCGATCTTCAT	GATCTCAGGCGACCCGGATT	ACGACCGGAGCGATCTTCAT	GATCTCAGGCGACCCGGATT	V1B
YDR524C	AGE1	3	D1.2	GCACTTATACCATAGTCGTC	AGATTGCAGTTGTCACAGGT	GCACTTATACCATAGTCGTC	AGATTGCAGTTGTCACAGGT	V1B
YIL105C	SLM1	3	D1.2	TATTCCCATCGGGTGCAAGG	CCCTTGCTAGTATGAGGTGT	TATTCCCATCGGGTGCAAGG	CCCTTGCTAGTATGAGGTGT	V1B
YPL203W	TPK2	3	D1.2	GGGATACAGCTAACTAACCC	GGGACCTTGACTCATATAGT	GGGATACAGCTAACTAACCC	GGGACCTTGACTCATATAGT	V1B
YJL042W	MHP1	3	D1.2	GATATAACGCCAGCGAAGCC	TAGATGCCGCTCATCGTAGT	GATATAACGCCAGCGAAGCC	TAGATGCCGCTCATCGTAGT	V1B
YMR251W-A	HOR7	3	D1.2	AGATGCTCATAACGCTGCTC	GCTCTGAGCATAGCATCAAC	AGATGCTCATAACGCTGCTC	GCTCTGAGCATAGCATCAAC	V1B
YDL056W	MBP1	3	D1.2	TAGTAACCCACACGTTCTGA	TCGACGGTCTTACAGGGTCT	TAGTAACCCACACGTTCTGA	TCGACGGTCTTACAGGGTCT	V1B
YGR246C	BRF1	3	D1.2	GCGCGTATCGGATCTCTCTT	TGTGAGAAGCACCGCCAACA	GCGCGTATCGGATCTCTCTT	TGTGAGAAGCACCGCCAACA	V1B
YDL098C	SNU23	3	D1.2	AAGCATTCTCAACGATGGCC	CACCCGTTATTGCAGTTAGT	AAGCATTCTCAACGATGGCC	CACCCGTTATTGCAGTTAGT	V1B
YLR355C	ILV5	3	D1.2	GGCTCCCACGGAACAGAATA	CTGAGCTGTCGAGATTGTCT	GGCTCCCACGGAACAGAATA	CTGAGCTGTCGAGATTGTCT	V1B
YMR267W	PPA2	3	D1.2	AAGTTTGCTCAAGTACCTCC	TCCTAGATGGTGAGACACGT	AAGTTTGCTCAAGTACCTCC	TCCTAGATGGTGAGACACGT	V1B
YLR044C	PDC1	3	D1.2	GGACTACTGCGAATACTTCC	GCGAGCGATTTCATTCACGT	GGACTACTGCGAATACTTCC	GCGAGCGATTTCATTCACGT	V1B
YER082C	UTP7	3	D1.2	CCATTGAGTCTAAGCGAGGG	ATTTCAGTCGCCCGATGGGT	CCATTGAGTCTAAGCGAGGG	ATTTCAGTCGCCCGATGGGT	V1B
YML063W	RPS1B	3	D1.2	GATTTGATCCAACGCCTCTA	GGCTCCGTACTTGCAGTTCT	GATTTGATCCAACGCCTCTA	GGCTCCGTACTTGCAGTTCT	V1B
YGL056C	SDS23	3	D1.2	AGAGTACCGGAACCTTCAGC	CTCATCTCTGGAGGTGACGT	AGAGTACCGGAACCTTCAGC	CTCATCTCTGGAGGTGACGT	V1B
YLR448W	RPL6B	3	D1.2	ACACTTACGCAACTACGGTA	CCGGGAGTGAGATTATTTCT	ACACTTACGCAACTACGGTA	CCGGGAGTGAGATTATTTCT	V1B
YER153C	PET122	3	D1.2	TAGACCTTCTGACATGGTGG	TAGTGCGACTTCCCTCAATT	TAGACCTTCTGACATGGTGG	TAGTGCGACTTCCCTCAATT	V1B
YLR432W	IMD3	3	D1.2	CGGTCTCAGATAATATACGC	GCGAGGTTAGTCATTTACGT	CGGTCTCAGATAATATACGC	GCGAGGTTAGTCATTTACGT	V1B
YJR005W	APL1	3	D1.2	CCGCGTTATTGAAGGTATAG	TATCCGGTGGCATCTCTGGT	CCGCGTTATTGAAGGTATAG	TATCCGGTGGCATCTCTGGT	V1B
YDR049W	VMS1	3	D1.2	GACATCCCATCAAGCGATTA	GGGTCACCGTTTCCTCAAGT	GACATCCCATCAAGCGATTA	GGGTCACCGTTTCCTCAAGT	V1B
YGR149W	#REF!	3	D1.2	GGAGACTATTTCACAGCATG	GCCCTTCGTATCAGCTAATT	GGAGACTATTTCACAGCATG	GCCCTTCGTATCAGCTAATT	V1B
YPL183W-A	RTC6	3	D1.2	AAGGATTATGCACCACTCGC	TTTGATCGAGTGGCACCCGT	AAGGATTATGCACCACTCGC	TTTGATCGAGTGGCACCCGT	V1B
YER039C-A	#REF!	3	D1.2	CAGAGATCCGTACAGATTAG	CGTAGCTTCGTCAGATTGGT	NA	NA	V1B
YFR048W	RMD8	3	D1.2	CCGCAGGTGTTACAATGTTA	TGTATCCCGCGTTGCACAGT	CCGCAGGTGTTACAATGTTA	TGTATCCCGCGTTGCACAGT	V1B
YGL153W	PEX14	3	D1.2	TTCCAGACCGAAGGAGACAC	AACATTTCGGGGCGCGCAGT	TTCCAGACCGAAGGAGACAC	AACATTTCGGGGCGCGCAGT	V1B
YGL055W	OLE1	3	D1.2	CCCTTTACATAACGGATTGC	AAGGAGTTTGCATTCCGCGT	CCCTTTACATAACGGATTGC	AAGGAGTTTGCATTCCGCGT	V1B
YEL003W	GIM4	3	D1.2	AGATGTAGAACACCCGTCAC	CTGTACTACGTCCGATCAGT	AGATGTAGAACACCCGTCAC	CTGTACTACGTCCGATCAGT	V1B
YKL181W	PRS1	3	D1.2	GGTAACCCTACAGTATCATC	CGTATATGCGTAGACTGCGT	GGTAACCCTACAGTATCATC	CGTATATGCGTAGACTGCGT	V1B
YIL047C	SYG1	3	D1.2	GCCACCGTAGAATACCGGAC	GGCAAACTTCGATTCAGAGT	GCCACCGTAGAATACCGGAC	GGCAAACTTCGATTCAGAGT	V1B
YEL005C	VAB2	3	D1.2	GACAGGGCACTAATGTTATC	GGACGGTCTCTCATTATCGT	GACAGGGCACTAATGTTATC	GGACGGTCTCTCATTATCGT	V1B
YDR248C	#REF!	3	D1.2	TTATTCGCACGATGACCGCG	TTTGCGTACCGCCTAGCTGT	TTATTCGCACGATGACCGCG	TTTGCGTACCGCCTAGCTGT	V1B
YJR126C	VPS70	3	D1.2	CAGGAGTGAGAAGCTACTAC	CAACCTTCGGGAGTACGAGT	CAGGAGTGAGAAGCTACTAC	CAACCTTCGGGAGTACGAGT	V1B
YGL084C	GUP1	3	D1.2	GGCTAGGCATTTCGTCCAAT	ATGGCCTCAGCGCCTAGATT	GGCTAGGCATTTCGTCCAAT	ATGGCCTCAGCGCCTAGATT	V1B
YDR035W	ARO3	3	D1.2	CCACCATAGTAAGTAAGCTC	TTACTTGTCCGACGGCTCGT	CCACCATAGTAAGTAAGCTC	TTACTTGTCCGACGGCTCGT	V1B
YOL100W	PKH2	3	D1.2	CAACTTGCTGTAAGAGTGCG	TCTCGTATCGGACGGTCTGT	CAACTTGCTGTAAGAGTGCG	TCTCGTATCGGACGGTCTGT	V1B
YLR084C	RAX2	3	D1.2	GCAGAGTACGGAACATTTAC	AATGTCACGTCCACCGGAGT	GCAGAGTACGGAACATTTAC	AATGTCACGTCCACCGGAGT	V1B
YNL044W	YIP3	3	D1.2	ATTGTAGGTCACGCGCCCAT	AGGATGACCGTTACTCGATT	ATTGTAGGTCACGCGCCCAT	AGGATGACCGTTACTCGATT	V1B
YGR251W	NOP19	3	D1.2	AGATACCCGACATTGTTCTC	CAGACCGTGTCAGTATTCGT	AGATACCCGACATTGTTCTC	CAGACCGTGTCAGTATTCGT	V1B
YOR231W	MKK1	3	D1.2	CATACTTCAGCATAGTCTCG	ATCTTCGATGCTAGGAGTGT	CATACTTCAGCATAGTCTCG	ATCTTCGATGCTAGGAGTGT	V1B
YIL079C	AIR1	3	D1.2	TCGGTATAATAACCCAGACC	GCCGATTGTATCATCTGAGT	TCGGTATAATAACCCAGACC	GCCGATTGTATCATCTGAGT	V1B
YKR063C	LAS1	3	D1.2	TGTAGTACCCTATCCCAGAT	CTAGATGATCGAGTCGGATT	TGTAGTACCCTATCCCAGAT	CTAGATGATCGAGTCGGATT	V1B
YOR087W	YVC1	3	D1.2	TAGGTATCGACACCCAGGTC	GAGCGGACTCTTCTACAGGT	TAGGTATCGACACCCAGGTC	GAGCGGACTCTTCTACAGGT	V1B
YJR105W	ADO1	3	D1.2	CACTATCTAGGAGGCTAAGG	ATCCCTCATGTCATAGGTGT	CACTATCTAGGAGGCTAAGG	ATCCCTCATGTCATAGGTGT	V1B
YDR533C	HSP31	3	D1.2	ATATTAGGGCGAAGCCACCC	CGCCCTTATCTCAGTATAGT	ATATTAGGGCGAAGCCACCC	CGCCCTTATCTCAGTATAGT	V1B
YIL030C	SSM4	3	D1.2	AAGATTACGCGAAGCCAGCC	TTTCGCCATCGACTCGTAGT	AAGATTACGCGAAGCCAGCC	TTTCGCCATCGACTCGTAGT	V1B
YDR105C	TMS1	3	D1.2	CCAAGCGATCCCAATAGTGA	TTGATCTGCCTCACGGGTCT	CCAAGCGATCCCAATAGTGA	TTGATCTGCCTCACGGGTCT	V1B
YMR260C	TIF11	3	D1.2	GCACGATTAACATGAATGCC	GCATACTCGTCACCGTTAGT	GCACGATTAACATGAATGCC	GCATACTCGTCACCGTTAGT	V1B
YGL036W	#REF!	3	D1.2	CAGCTCAGCCAACTGGAATA	GTCAGGCTCATAGCTTGTCT	CAGCTCAGCCAACTGGAATA	GTCAGGCTCATAGCTTGTCT	V1B
YCR087C-A	#REF!	3	D1.2	TGATTGCAGACATATCCTCC	CGCATGATCTTAGTACACGT	TGATTGCAGACATATCCTCC	CGCATGATCTTAGTACACGT	V1B
YGR043C	NQM1	3	D1.2	CCGCTCATTCAAGAGAACTA	CTTAGGGATGCAGGTATTCT	CCGCTCATTCAAGAGAACTA	CTTAGGGATGCAGGTATTCT	V1B
YNR011C	PRP2	3	D1.2	AGGATACCTGAACATCTTCC	GCTTCATTCTTGACAGACGT	AGGATACCTGAACATCTTCC	GCTTCATTCTTGACAGACGT	V1B
YDR196C	CAB5	3	D1.2	TACACTCCGATACACTAGAG	TTCACGCTGGACCTATGGGT	TACACTCCGATACACTAGAG	TTCACGCTGGACCTATGGGT	V1B
YIL159W	BNR1	3	D1.2	CACGGTATTTAATCGGATGG	GAAGCGTCCCTATCCTTTGT	CACGGTATTTAATCGGATGG	GAAGCGTCCCTATCCTTTGT	V1B
YDL150W	RPC53	3	D1.2	GCCTACACTATAATCAGAGC	CGATCCACGCGATTTGACGT	GCCTACACTATAATCAGAGC	CGATCCACGCGATTTGACGT	V1B
YPL057C	SUR1	3	D1.2	AACGTCTGCTAACCGTGGAG	CTCACTGTACCGGAGATGGT	AACGTCTGCTAACCGTGGAG	CTCACTGTACCGGAGATGGT	V1B
YHL004W	MRP4	3	D1.2	CAACGTGGTCCAATTCGGTA	TTTGAGGCGGCCACCTTTCT	CAACGTGGTCCAATTCGGTA	TTTGAGGCGGCCACCTTTCT	V1B
YLR022C	SDO1	3	D1.2	CGAACAGCTCGGAATTACGC	CTCCGATGTTTCATAACCGT	CGAACAGCTCGGAATTACGC	CTCCGATGTTTCATAACCGT	V1B
YDR120C	TRM1	3	D1.2	CCATGACGTTAAGGGACTAG	CCCTTGCTTAGGAGTCTGGT	CCATGACGTTAAGGGACTAG	CCCTTGCTTAGGAGTCTGGT	V1B
YGL162W	SUT1	3	D1.2	CCCGGACCAGAAGATTATTA	GAGTCTCATCTCCTTCAAGT	CCCGGACCAGAAGATTATTA	GAGTCTCATCTCCTTCAAGT	V1B
YEL047C	FRD1	3	D1.2	CCAGTGGAGTGAATATCGTG	CTAAGCGAGGTGTGCTAATT	CCAGTGGAGTGAATATCGTG	CTAAGCGAGGTGTGCTAATT	V1B
YHR067W	HTD2	3	D1.2	TCAACAAGAACATTCATCGC	AACGAGTATGCGAGACCCGT	TCAACAAGAACATTCATCGC	AACGAGTATGCGAGACCCGT	V1B
YOR076C	SKI7	3	D1.2	CGCAGTCGCATTAACCTTAG	CGAGAGCGTTTCATATTGGT	CGCAGTCGCATTAACCTTAG	CGAGAGCGTTTCATATTGGT	V1B
YIL133C	RPL16A	3	D1.2	GGCCGCTCTATCAACATTTA	TGCCTGACGTTGACGACAGT	GGCCGCTCTATCAACATTTA	TGCCTGACGTTGACGACAGT	V1B
YOR220W	RCN2	1	D1.1	TATAGACGGACACAGTCGCC	GAAGATAGATCACGCCGTCC	TATAGACGGACACAGTCGCC	GAAGATAGATCACGCCGTCC	V1A
YBR194W	AIM4	1	D1.1	TAGTTTATCCGCCCGGTGCT	TCGATTCGGAGATCCTGGTT	TAGTTTATCCGCCCGGTGCT	TCGATTCGGAGATCCTGGTT	V1A
YMR178W	#REF!	1	D1.1	GAATACGAGGTCACAGTACG	AATTGTCCAGCATTGTGCCG	GAATACGAGGTCACAGTACG	AATTGTCCAGCATTGTGCCG	V1A
YLR297W	#REF!	1	D1.1	ATCGGATTTGCACTGGCCGT	TGATGTGTCATACCCGCCTT	ATCGGATTTGCACTGGCCGT	TGATGTGTCATACCCGCCTT	V1A
YER078C	ICP55	1	D1.1	ATGTACGGAACCTCGATGCC	CAGGGATGAACAGTCCTTCC	ATGTACGGAACCTCGATGCC	CAGGGATGAACAGTCCTTCC	V1A
YEL011W	GLC3	1	D1.1	CAGGGATGGTCATATTTGCT	CTCTCCGGGATTGCGATGTT	CAGGGATGGTCATATTTGCT	CTCTCCGGGATTGCGATGTT	V1A
YKL061W	BLI1	1	D1.1	TTATGAGACCGCTGCAACCG	CCTCGTTAATGATATGTCCG	NA	NA	V1A
YPL049C	DIG1	1	D1.1	ACTCTCATTGGGTGTAAGGT	AGGGCTCTACTAGCTTCCTT	ACTCTCATTGGGTGTAAGGT	AGGGCTCTACTAGCTTCCTT	V1A
YBR117C	TKL2	1	D1.1	CTACTAGAGAGAGATACGCG	CCTCATATCGCATTAGATCG	CTACTAGAGAGAGATACGCG	CCTCATATCGCATTAGATCG	V1A
YIL008W	URM1	1	D1.1	TGTTTCACGCGGGTCCATCT	GATTCCTAGCTCGCGCTGTT	TGTTTCACGCGGGTCCATCT	GATTCCTAGCTCGCGCTGTT	V1A
YMR140W	SIP5	1	D1.1	ATATGGAGTCCCGCCAGCAT	AACATGCGATAAGGCGGCTC	ATATGGAGTCCCGCCAGCAT	AACATGCGATAAGGCGGCTC	V1A
YDR320C	SWA2	1	D1.1	ACCTGCTTGGCATCTTGGGT	GAGCGACTGCGACTTAGCTT	ACCTGCTTGGCATCTTGGGT	GAGCGACTGCGACTTAGCTT	V1A
YGR122W	#REF!	1	D1.1	GAGCACTCAGTACCAGTCAG	GATACATCTCCAGCTTACGC	GAGCACTCAGTACCAGTCAG	GATACATCTCCAGCTTACGC	V1A
YIL007C	NAS2	1	D1.1	ACAGCTCACCGAGTATAGTG	ACTATGATGGCAGACCCGTA	ACAGCTCACCGAGTATAGTG	ACTATGATGGCAGACCCGTA	V1A
YMR099C	#REF!	1	D1.1	GGTAGGACTTCACTTCATCT	ACAACTCCTTCGATGGTGTT	GGTAGGACTTCACTTCATCT	ACAACTCCTTCGATGGTGTT	V1A
YHR018C	ARG4	1	D1.1	CTGGAGACACGATAGACAGT	GCGCCATATAAATTCTCGCA	CTGGAGACACGATAGACAGT	GCGCCATATAAATTCTCGCA	V1A
YGR019W	UGA1	1	D1.1	ATGCTGACGCAGATCCGATG	AGACCTTGCACATGCTTGCG	ATGCTGACGCAGATCCGATG	AGACCTTGCACATGCTTGCG	V1A
YLL061W	MMP1	1	D1.1	TTAGGGATACGCAGCCATCG	TTAAGATACCTGCCCATTCG	TTAGGGATACGCAGCCATCG	TTAAGATACCTGCCCATTCG	V1A
YJL087C	TRL1	1	D1.1	TTATGTACCATCATGCCCAG	TCGCGCATAAGACCAATCGA	NA	NA	V1A
YER107C	GLE2	1	D1.1	GAGTCTCGTGCATCTGCTCT	AGCAGAGCGCACCGTATGAT	GAGTCTCGTGCATCTGCTCT	AGCAGAGCGCACCGTATGAT	V1A
YNL326C	PFA3	1	D1.1	GGCACCGTAGTCACTTCTAT	ACACCGTCTTCAGTGCTATT	GGCACCGTAGTCACTTCTAT	ACACCGTCTTCAGTGCTATT	V1A
YPR191W	QCR2	1	D1.1	CACCTGCGGTCGATGTTGTT	GTGTGTACCGTCCCTCAGTT	CACCTGCGGTCGATGTTGTT	GTGTGTACCGTCCCTCAGTT	V1A
YER036C	ARB1	1	D1.1	ATGAGCCCGTGACTGCGATT	GCCGAAGTTATCGCAATGTA	ATGAGCCCGTGACTGCGATT	GCCGAAGTTATCGCAATGTA	V1A
YJL157C	FAR1	1	D1.1	TTATGGTGCAGCGTGCCACT	CTACTGTTGAGAGCGGTATT	TTATGGTGCAGCGTGCCACT	CTACTGTTGAGAGCGGTATT	V1A
YCL035C	GRX1	1	D1.1	GCGGCGTTAAGACAAATTAC	GACGGCGTTCGACTCTTGTT	GCGGCGTTAAGACAAATTAC	GACGGCGTTCGACTCTTGTT	V1A
YHR098C	SFB3	1	D1.1	ATGTTTCCGCGACGCCGTTT	CAGGTACTGCGATTTGAGTT	ATGTTTCCGCGACGCCGTTT	CAGGTACTGCGATTTGAGTT	V1A
YDR322C-A	TIM11	1	D1.1	GCATGGTGCATAATGTGTTC	GCGCACCATAATTTCTAACA	GCATGGTGCATAATGTGTTC	GCGCACCATAATTTCTAACA	V1A
YKL019W	RAM2	1	D1.1	ATTGTAGACGCGCCGAACCT	GAGGCGTTACGAGCTTTATT	ATTGTAGACGCGCCGAACCT	GAGGCGTTACGAGCTTTATT	V1A
YHR158C	KEL1	1	D1.1	GGAGGATACTAACCTACACC	TTACGACCAGAACGGGACAC	GGAGGATACTAACCTACACC	TTACGACCAGAACGGGACAC	V1A
YBL011W	SCT1	1	D1.1	CAGACAGAGACAGGTGTACC	TGCCATAGAAGCCAAGGTGA	TCATGTGTTAGAATGCTGGC	TGCCATAGAAGCCAAGGTGA	V1A
YLR356W	ATG33	1	D1.1	ATACAAACACGATTCGCGCT	AGTGTATCCCTCTCGACGTT	ATACAAACACGATTCGCGCT	AGTGTATCCCTCTCGACGTT	V1A
YCL031C	RRP7	1	D1.1	AACTCAGCGGAATGGATAGC	AACATGCTCCAATGCGCGTA	AACTCAGCGGAATGGATAGC	AACATGCTCCAATGCGCGTA	V1A
YJL079C	PRY1	1	D1.1	GACAGGAGGCGAATATGCCC	CACACAGTATAAGACTTGCC	GACAGGAGGCGAATATGCCC	CACACAGTATAAGACTTGCC	V1A
YDL192W	ARF1	1	D1.1	TGAGTTACCCTACCTATCGT	AGGTTCCCTACACGCTTACT	TGAGTTACCCTACCTATCGT	AGGTTCCCTACACGCTTACT	V1A
YDL195W	SEC31	1	D1.1	GGTTAATTTACCCGAATCCC	GGAACGAGTAGCAGACATCC	GGTTAATTTACCCGAATCCC	GGAACGAGTAGCAGACATCC	V1A
YIL090W	ICE2	1	D1.1	GACAGGTAGGACATTACTCC	AGAGATACGGCACCATCGTC	GACAGGTAGGACATTACTCC	AGAGATACGGCACCATCGTC	V1A
YPL096W	PNG1	1	D1.1	ATGCTTGTGCAACGTGCGCC	CAAGACGCTGTTGCATTTGT	ATGCTTGTGCAACGTGCGCC	CAAGACGCTGTTGCATTTGT	V1A
YBR104W	YMC2	1	D1.1	AGACATAGCCGAATGGAGCC	ATGAAGGTTCCGTCAACTCC	AGACATAGCCGAATGGAGCC	ATGAAGGTTCCGTCAACTCC	V1A
YDL159W	STE7	1	D1.1	AATTTCGCCGCATGGTGCTG	ACATCGGTGGAATCGTGCTC	AATTTCGCCGCATGGTGCTG	ACATCGGTGGAATCGTGCTC	V1A
YHL033C	RPL8A	1	D1.1	TTATCTTCCCGAGCGGTGCC	AACATGACTTGAGGCTGGTT	TTATCTTCCCGAGCGGTGCC	AACATGACTTGAGGCTGGTT	V1A
YGL053W	PRM8	1	D1.1	ATGGTTACCCGATTCTCCGT	CTGAGTAGTATATGGGCCTT	ATGGTTACCCGATTCTCCGT	CTGAGTAGTATATGGGCCTT	V1A
YOR160W	MTR10	1	D1.1	GAGTCTTCACCAGTTGACCG	ATACATGGATCAGCAGAGCG	GAGTCTTCACCAGTTGACCG	ATACATGGATCAGCAGAGCG	V1A
YGR256W	GND2	1	D1.1	ACCGACTGGTCACGTTTGCT	GTGACCCGGCTACCTATGTT	ACCGACTGGTCACGTTTGCT	GTGACCCGGCTACCTATGTT	V1A
YEL040W	UTR2	1	D1.1	ACTATCCTGGAGCTAGAGGT	CGGCTAGTGAGACTTTCCTT	ACTATCCTGGAGCTAGAGGT	CGGCTAGTGAGACTTTCCTT	V1A
YIL096C	#REF!	1	D1.1	TTTATCCCAGGCAGTACGCG	TACCGTGACACAGGTGATCG	TTTATCCCAGGCAGTACGCG	TACCGTGACACAGGTGATCG	V1A
YLR068W	FYV7	1	D1.1	GTAGAGGAGCCCTTCCATCT	TTACGCCTTCGACGGCTGTT	GTAGAGGAGCCCTTCCATCT	TTACGCCTTCGACGGCTGTT	V1A
YDL103C	QRI1	1	D1.1	ATCCATGCTCCAGGTTGGTG	TCATCGTGCGTAATGTCGCG	ATCCATGCTCCAGGTTGGTG	TCATCGTGCGTAATGTCGCG	V1A
YLR451W	LEU3	1	D1.1	TACGGACTTGTCAGTATGGT	GGTACTGATCCTTCACGCTT	TACGGACTTGTCAGTATGGT	GGTACTGATCCTTCACGCTT	V1A
YOR037W	CYC2	1	D1.1	ACATAGTGACCATCTCTCAG	CCGAGTGACACAGATAGAGC	ACATAGTGACCATCTCTCAG	CCGAGTGACACAGATAGAGC	V1A
YJR133W	XPT1	1	D1.1	GACGAGGGTGCATTTCACCT	AAGCTCCCTTGCCATGTGTT	GACGAGGGTGCATTTCACCT	AAGCTCCCTTGCCATGTGTT	V1A
YHR101C	BIG1	1	D1.1	CCACCATGATGAATTGTCAT	GCTCTCTCGAAATACACGAA	CCACCATGATGAATTGTCAT	GCTCTCTCGAAATACACGAA	V1A
YDR261C	EXG2	1	D1.1	GCGACAATCAACTCGATGCA	TGACGCTTCGGCATCTGTCT	GCGACAATCAACTCGATGCA	TGACGCTTCGGCATCTGTCT	V1A
YHR029C	YHI9	1	D1.1	GATGCTAACCGACGATCTGC	GCATCATACGAATCCAGTAC	GATGCTAACCGACGATCTGC	GCATCATACGAATCCAGTAC	V1A
YJR008W	MHO1	1	D1.1	GAGACCACATCTAATTCAGC	CCCATGATCTCAATTAGGAC	GAGACCACATCTAATTCAGC	CCCATGATCTCAATTAGGAC	V1A
YJL100W	LSB6	1	D1.1	CGACTAGGGACAGTTCTTAG	AGATCACCATCATAGCGACG	CGACTAGGGACAGTTCTTAG	AGATCACCATCATAGCGACG	V1A
YKL091C	#REF!	1	D1.1	TCTCGAATGAGTGGCAAAGC	AGCTCAGGACGATTGTAGAT	TCTCGAATGAGTGGCAAAGC	AGCTCAGGACGATTGTAGAT	V1A
YER126C	NSA2	1	D1.1	CGACGACTGCTCACGATTAT	TATGAGTCTGCACGACCCTG	CGACGACTGCTCACGATTAT	TATGAGTCTGCACGACCCTG	V1A
YGR120C	COG2	1	D1.1	ACCTATTCCCGATTGGCGTT	CTGAGGGATCGACTGTTCTT	ACCTATTCCCGATTGGCGTT	CTGAGGGATCGACTGTTCTT	V1A
YNR021W	#REF!	1	D1.1	ATATCGCACGTCACTCATGG	CCCGAGTATCTGAGCTGATT	ATATCGCACGTCACTCATGG	CCCGAGTATCTGAGCTGATT	V1A
YER048W-A	ISD11	1	D1.1	CCACGCGGTAGATATAGTAT	AAGCCCGTTGTCCATCTATT	CCACGCGGTAGATATAGTAT	AAGCCCGTTGTCCATCTATT	V1A
YER007C-A	TMA20	1	D1.1	CCTTCTTAGAGATGGTTAGG	GCCCGTGGACAAACTTCAAA	CCTTCTTAGAGATGGTTAGG	GCCCGTGGACAAACTTCAAA	V1A
YGR271C-A	EFG1	1	D1.1	ATCATGCGCCAAGCCGTGTA	TTATGCACCGTGACGAGGCC	ATCATGCGCCAAGCCGTGTA	TTATGCACCGTGACGAGGCC	V1A
YER172C	BRR2	1	D1.1	AGTGACGCCTTCGCACATTT	GGATGGCCCTCTTCTCAGTT	AGTGACGCCTTCGCACATTT	GGATGGCCCTCTTCTCAGTT	V1A
YNR016C	ACC1	1	D1.1	TTAGTAGTCCCGACGGCACT	CACGGTCGTTAGATGGTATT	TTAGTAGTCCCGACGGCACT	CACGGTCGTTAGATGGTATT	V1A
YPR066W	UBA3	1	D1.1	ACTCGCGTATGAGGTCGTTT	TAGTACCTCGTCCCATAGTT	ACTCGCGTATGAGGTCGTTT	TAGTACCTCGTCCCATAGTT	V1A
YER093C-A	AIM11	1	D1.1	CAAGAGGATTGCATAGACCT	AGCCGGGACTGATCTTTATT	CAAGAGGATTGCATAGACCT	AGCCGGGACTGATCTTTATT	V1A
YKL010C	UFD4	1	D1.1	ATATTGCTCGAAGTGCCCGC	TTTATCCCACCGGCAGAATT	ATATTGCTCGAAGTGCCCGC	TTTATCCCACCGGCAGAATT	V1A
YDR253C	MET32	1	D1.1	CATCATTGGTGCATGGCGCT	CTCTTAGTGAGTAGGACGTT	CATCATTGGTGCATGGCGCT	CTCTTAGTGAGTAGGACGTT	V1A
YDR424C	DYN2	1	D1.1	GGACATCATACCAAGCCTGA	CGTGCCTACACATAAAGCTA	GGACATCATACCAAGCCTGA	CGTGCCTACACATAAAGCTA	V1A
YDR450W	RPS18A	1	D1.1	AGACCGCTACAACTGCTTGA	GCGCTAGTAAGCAATGAGTA	AGACCGCTACAACTGCTTGA	GCGCTAGTAAGCAATGAGTA	V1A
YDR214W	AHA1	1	D1.1	AGAGACGTTTGGCAACTCCC	GAGGAGACTACATACCATCC	AGAGACGTTTGGCAACTCCC	GAGGAGACTACATACCATCC	V1A
YLR191W	PEX13	1	D1.1	GCCCAAATAAGACGTGAGCC	GAGGAATAGCTCCGAACTCC	GCCCAAATAAGACGTGAGCC	GAGGAATAGCTCCGAACTCC	V1A
YBR149W	ARA1	1	D1.1	CTACATGCAGTACAGTGGAG	CCATCTAGTTGAATCCTGAG	CTACATGCAGTACAGTGGAG	CCATCTAGTTGAATCCTGAG	V1A
YEL051W	VMA8	1	D1.1	GGATTATCTACCACCTGACG	CCAAGAAATCTAAGTGCCCG	GGATTATCTACCACCTGACG	CCAAGAAATCTAAGTGCCCG	V1A
YGR200C	ELP2	1	D1.1	TACGATTGCAGAGATTGCTG	ACATGGACGACATTGTGCTC	TACGATTGCAGAGATTGCTG	ACATGGACGACATTGTGCTC	V1A
YDL063C	SYO1	1	D1.1	AGTAATAACGGATCGGTGCT	AGGCTCCTTCGACTCTGGTT	AGTAATAACGGATCGGTGCT	AGGCTCCTTCGACTCTGGTT	V1A
YGR240C	PFK1	1	D1.1	GACACTCTCGAACTGTAGGC	GCACGACTACGAGAGTATAG	GACACTCTCGAACTGTAGGC	GCACGACTACGAGAGTATAG	V1A
YOL136C	PFK27	1	D1.1	TTTCTAGTACGGGCCAGCGT	AAAGCCTTGGTCATTGCCTT	TTTCTAGTACGGGCCAGCGT	AAAGCCTTGGTCATTGCCTT	V1A
YLR422W	#REF!	1	D1.1	CCTTAGAGTCGCCGGAATCT	AACGGAGCGTGATCTATGTT	CCTTAGAGTCGCCGGAATCT	AACGGAGCGTGATCTATGTT	V1A
YPL018W	CTF19	1	D1.1	CTCAGGATAGTCATGGAGAT	GAACTGAATGCACTCGAGGC	CTCAGGATAGTCATGGAGAT	GAACTGAATGCACTCGAGGC	V1A
YNL242W	ATG2	1	D1.1	TATATTTCCCGGAGGTGAGT	GTATGATCCGTGCAGCCCTT	TATATTTCCCGGAGGTGAGT	GTATGATCCGTGCAGCCCTT	V1A
YCR048W	ARE1	1	D1.1	ATGCAAACAGCAGGTACGCG	GTTCCCATTCCATGTGATCG	ATGCAAACAGCAGGTACGCG	GTTCCCATTCCATGTGATCG	V1A
YBL075C	SSA3	1	D1.1	CGATGTCAGATAAGGTATGC	CATATCTAGGAAGTGAGAGC	CGATGTCAGATAAGGTATGC	CATATCTAGGAAGTGAGAGC	V1A
YKR072C	SIS2	1	D1.1	TGATCCTCGACATGGACTCG	ACATCATGCACAGTGGCTGC	TGATCCTCGACATGGACTCG	ACATCATGCACAGTGGCTGC	V1A
YFR053C	HXK1	1	D1.1	CGTGGTACGATTTACGATCT	ATTGACGCCCGGACTGTGTT	CGTGGTACGATTTACGATCT	ATTGACGCCCGGACTGTGTT	V1A
YPL162C	#REF!	1	D1.1	GGAACATCTGCACAATCGCA	CCTCGCGCTAGATAGATGTG	GGAACATCTGCACAATCGCA	CCTCGCGCTAGATAGATGTG	V1A
YGL231C	EMC4	1	D1.1	CATGAGGGCAAAGTCCTGAA	TATTGGCGCTGCACCTGTCT	CATGAGGGCAAAGTCCTGAA	TATTGGCGCTGCACCTGTCT	V1A
YGL237C	HAP2	1	D1.1	GCTCACACTAAAGGGCATCA	CTATGCTTCATCAGTCGAGT	GCTCACACTAAAGGGCATCA	CTATGCTTCATCAGTCGAGT	V1A
YJR148W	BAT2	1	D1.1	ACGGATCGGACATTGTTTAG	TCATATCATCCAGGCCGACG	ACGGATCGGACATTGTTTAG	TCATATCATCCAGGCCGACG	V1A
YHR152W	SPO12	1	D1.1	ATATACGTGGAATGACTGGC	TATGTCACCGTCATCGTGCT	ATATACGTGGAATGACTGGC	TATGTCACCGTCATCGTGCT	V1A
YDR246W	TRS23	1	D1.1	ATGCTACGGCCACTAGGTTG	ACCTGAGTTAGAGGATGACT	ATGCTACGGCCACTAGGTTG	ACCTGAGTTAGAGGATGACT	V1A
YCR079W	PTC6	1	D1.1	GGGTCGACATAACTGACACC	GCAGACTGTTAATTCTCCTC	GGGTCGACATAACTGACACC	GCAGACTGTTAATTCTCCTC	V1A
YGR235C	MOS2	1	D1.1	ATAACCGTCCTTCAGTCGTT	ACGCGGCTATGAGCTTTCTT	ATAACCGTCCTTCAGTCGTT	ACGCGGCTATGAGCTTTCTT	V1A
YGL027C	CWH41	1	D1.1	TACCTCAGTCGCAGAGATGG	CTGGACTGGATACTGTGATT	TACCTCAGTCGCAGAGATGG	CTGGACTGGATACTGTGATT	V1A
YPL255W	BBP1	1	D1.1	TCAGGTGAGTCATTGGCTCT	TATACGCCTGCCCATGTGTG	TCAGGTGAGTCATTGGCTCT	TATACGCCTGCCCATGTGTG	V1A
YPL211W	NIP7	1	D1.1	CTATCTTCGGGCAGTGGTAT	AGCTGTCAGGTCACTCTATT	CTATCTTCGGGCAGTGGTAT	AGCTGTCAGGTCACTCTATT	V1A
YDL128W	VCX1	1	D1.1	CATGCTCAGACAGTATGTGC	ATATGAGCACCAGAGAGCCC	CATGCTCAGACAGTATGTGC	ATATGAGCACCAGAGAGCCC	V1A
YDL215C	GDH2	1	D1.1	AGCGACGGCTTGTCAGATTT	CCCAGCCTATTTGGTCAGTT	AGCGACGGCTTGTCAGATTT	CCCAGCCTATTTGGTCAGTT	V1A
YDR517W	GRH1	1	D1.1	CAGACTAGAGAATCGCCGAC	GGCACTAACGCAATGTGCTA	CAGACTAGAGAATCGCCGAC	GGCACTAACGCAATGTGCTA	V1A
YDL043C	PRP11	1	D1.1	CATACATGATGAGCTGAGGT	TATGATTGGCAGCCCGCACT	CATACATGATGAGCTGAGGT	TATGATTGGCAGCCCGCACT	V1A
YGR078C	PAC10	1	D1.1	CACATCTCTGTCACGGGTTT	TGGCAACCTCTCCGATAGTT	CACATCTCTGTCACGGGTTT	TGGCAACCTCTCCGATAGTT	V1A
YOR073W	SGO1	1	D1.1	GCGCTGCAATCAGAAAGGTA	GAGTCTCACCGACACTGATG	GCGCTGCAATCAGAAAGGTA	GAGTCTCACCGACACTGATG	V1A
YER090W	TRP2	1	D1.1	CTATCTACTGGCAGGAGCTG	GGACTTCCACGACGTATCTG	CTATCTACTGGCAGGAGCTG	GGACTTCCACGACGTATCTG	V1A
YIL002C	INP51	1	D1.1	GTACTGAATGGATATGCGCT	ATCTTCTGAGGTCGGACGTT	GTACTGAATGGATATGCGCT	ATCTTCTGAGGTCGGACGTT	V1A
YJL048C	UBX6	1	D1.1	GCTAAGAGGATATAACGGTC	TCCTTCATGCGGGTACAGGT	GCTAAGAGGATATAACGGTC	TCCTTCATGCGGGTACAGGT	V1A
YIR009W	MSL1	1	D1.1	ACGACAGTGTTGTAAAGCCC	TTACCAGGGACACAGTTGTC	ACGACAGTGTTGTAAAGCCC	TTACCAGGGACACAGTTGTC	V1A
YGR165W	MRPS35	1	D1.1	CATGGATGACGAGTCTGCAT	TGACTAGCGACATGCTGCTC	CATGGATGACGAGTCTGCAT	TGACTAGCGACATGCTGCTC	V1A
YIL144W	TID3	1	D1.1	TTCTATCTCCGACGGTGGGT	AGGATTACGTTCACCCTTCT	TTCTATCTCCGACGGTGGGT	AGGATTACGTTCACCCTTCT	V1A
YOR340C	RPA43	1	D1.1	CGTAGATGTCAATACTAGCC	GAGAGGACCTTGAACACTCC	CGTAGATGTCAATACTAGCC	GAGAGGACCTTGAACACTCC	V1A
YGL209W	MIG2	1	D1.1	AGACGATAGTTGCATGTGCT	CATACGGGCCTAGTCTGGTT	AGACGATAGTTGCATGTGCT	CATACGGGCCTAGTCTGGTT	V1A
YIL160C	POT1	1	D1.1	TATAGGTTTCCATCCCGCGT	GATAGCTCCTTCAGATCCTT	TATAGGTTTCCATCCCGCGT	GATAGCTCCTTCAGATCCTT	V1A
YMR271C	URA10	1	D1.1	ATGTTATCCGCCACTGCTGG	TATGCCTCACCCAGGATTGG	ATGTTATCCGCCACTGCTGG	TATGCCTCACCCAGGATTGG	V1A
YJL057C	IKS1	1	D1.1	CAACGCACTGTAATCTACCG	TACTATACCGGAGCTGAGCG	NA	NA	V1A
YPL007C	TFC8	1	D1.1	CAATGCACCGTAATCTACCG	TACTATACCGGAGCTGAGCG	NA	NA	V1A
YJR138W	IML1	1	D1.1	TCCCGTAGGGTGGATAATCT	CCGAGCGTTTAGAGTATGTT	TCCCGTAGGGTGGATAATCT	CCGAGCGTTTAGAGTATGTT	V1A
YOL052C-A	DDR2	1	D1.1	AGAATCTCTAGCAAGCCCTA	CGTGAGTACCAAGATTAGGA	NA	NA	V1A
YKL166C	TPK3	1	D1.1	TACCGCTTACGAGGTTAGGT	ACTTGAGCGGTTGACAGCTT	TACCGCTTACGAGGTTAGGT	ACTTGAGCGGTTGACAGCTT	V1A
YDR062W	LCB2	1	D1.1	ATAGGGCCTTGCACGCATCT	AACGTCCGATTAGCTCTGTT	ATAGGGCCTTGCACGCATCT	AACGTCCGATTAGCTCTGTT	V1A
YMR113W	FOL3	1	D1.1	AATCGCTTCTCAGCCGTGGT	AAGTTCACCTGATACCGCTT	AATCGCTTCTCAGCCGTGGT	AAGTTCACCTGATACCGCTT	V1A
YGL189C	RPS26A	1	D1.1	GATAGTCACCCAGACGTTGC	GCATCGACTTAATGGTCACG	GATAGTCACCCAGACGTTGC	GCATCGACTTAATGGTCACG	V1A
YCR044C	PER1	1	D1.1	ATGATCCACCTCACTTGATG	TCAGACTTGAGCACAGCGAG	ATGATCCACCTCACTTGATG	TCAGACTTGAGCACAGCGAG	V1A
YER052C	HOM3	1	D1.1	GCCGTGTGAACAATCCAGAA	ACTGCTATCAGAGCCGCATG	GCCGTGTGAACAATCCAGAA	ACTGCTATCAGAGCCGCATG	V1A
YJL083W	TAX4	1	D1.1	GTGCGCGACACAACGCTGAA	AGCTACCGAGTCGATCTGAT	GTGCGCGACACAACGCTGAA	AGCTACCGAGTCGATCTGAT	V1A
YIL162W	SUC2	1	D1.1	GCATACATGAGACTTCGACC	AGACTGCGCCAACGTATCTA	GCATACATGAGACTTCGACC	AGACTGCGCCAACGTATCTA	V1A
YEL066W	HPA3	1	D1.1	CTTGACAGGAGTGATAAACC	CAGTTTAACGCATCGGGACG	CTTGACAGGAGTGATAAACC	CAGTTTAACGCATCGGGACG	V1A
YGL105W	ARC1	1	D1.1	CTATTAGAGGGCAGAATTTG	AACCGGCAGTGAGTCAGAAT	CTATTAGAGGGCAGAATTTG	AACCGGCAGTGAGTCAGAAT	V1A
YDL167C	NRP1	1	D1.1	AGGAACCCAGTTTGACGAAG	GCCTCACCATTGATTAACAG	AGGAACCCAGTTTGACGAAG	GCCTCACCATTGATTAACAG	V1A
YKL119C	VPH2	1	D1.1	CACTGACGCTCACTGATTAT	ATAGTGATTGCACCGCCCTG	CACTGACGCTCACTGATTAT	ATAGTGATTGCACCGCCCTG	V1A
YDL173W	PAR32	1	D1.1	AAGCCATTCGTTCACAGGTT	ACGCTACGGTGTCCGAAGTT	AAGCCATTCGTTCACAGGTT	ACGCTACGGTGTCCGAAGTT	V1A
YHR175W	CTR2	1	D1.1	TGAGGCCGTCCACTCTGTAT	CTAGGCGTAGGGATTCTATT	TGAGGCCGTCCACTCTGTAT	CTAGGCGTAGGGATTCTATT	V1A
YMR252C	#REF!	1	D1.1	CCATATCGTGAACGCTGTGC	ATGATCTGGCAATAGCGCCC	CCATATCGTGAACGCTGTGC	ATGATCTGGCAATAGCGCCC	V1A
YOR321W	PMT3	1	D1.1	CAGCATGTATCAAGTACGAC	CCGCTAGAGCAAGTAATGGA	CAGCATGTATCAAGTACGAC	CCGCTAGAGCAAGTAATGGA	V1A
YIL104C	SHQ1	1	D1.1	CACGTATCGTCATAGAGACT	GACCCGGATGCTTCATTATT	CACGTATCGTCATAGAGACT	GACCCGGATGCTTCATTATT	V1A
YCL043C	PDI1	1	D1.1	GAACTACCTCCAAGGGTCTA	GAACCCTCCGTATATGCTTT	GAACTACCTCCAAGGGTCTA	GAACCCTCCGTATATGCTTT	V1A
YDL045W-A	MRP10	1	D1.1	GCCCGCATGAAATGAGGACA	ATTGCTTCCAGCGTGGCACT	GCCCGCATGAAATGAGGACA	ATTGCTTCCAGCGTGGCACT	V1A
YOL069W	NUF2	1	D1.1	ACGGGATGCTGACTATGTTT	GAGGCGTTATTCCAGTAGTT	ACGGGATGCTGACTATGTTT	GAGGCGTTATTCCAGTAGTT	V1A
YGL012W	ERG4	1	D1.1	TCTCTAAGAAGACATCGGGA	GCGCGGTCAGAACTAATATA	TCTCTAAGAAGACATCGGGA	GCGCGGTCAGAACTAATATA	V1A
YDL204W	RTN2	1	D1.1	TAGTAGACTGGAGCTTACCT	ACGCGGATGTTGTAGAACTT	TAGTAGACTGGAGCTTACCT	ACGCGGATGTTGTAGAACTT	V1A
YER068W	MOT2	1	D1.1	GCATTAGTAACATGGTGTGC	ACGTCAGGTCAATCATGCCC	GCATTAGTAACATGGTGTGC	ACGTCAGGTCAATCATGCCC	V1A
YKL096W-A	CWP2	1	D1.1	ATTAGGGCTTCCACTGCGCT	TACTATCGTAGGTGGACGTT	ATTAGGGCTTCCACTGCGCT	TACTATCGTAGGTGGACGTT	V1A
YDR236C	FMN1	1	D1.1	AAGCGTTGACAAGCTAGTGA	GGCCAGGAACTAACGATCTA	AAGCGTTGACAAGCTAGTGA	GGCCAGGAACTAACGATCTA	V1A
YCL034W	LSB5	1	D1.1	CGGCCACTAAGATATGTTGA	TTAGACAGGCAAGGCTAGTA	CGGCCACTAAGATATGTTGA	TTAGACAGGCAAGGCTAGTA	V1A
YNR031C	SSK2	1	D1.1	TTACCCTGCGGACTAGGTGT	AGGTTACTCCGATAGCCCGT	TTACCCTGCGGACTAGGTGT	AGGTTACTCCGATAGCCCGT	V1A
YOL117W	RRI2	1	D1.1	TAGAGGCAGACATAGGTCCC	AAGTGAATAGCATCCCATCC	TAGAGGCAGACATAGGTCCC	AAGTGAATAGCATCCCATCC	V1A
YJR012C	#REF!	1	D1.1	GGCTAATACTTCTGAACCCC	GTATTTATCACACGCTCGTC	GGCTAATACTTCTGAACCCC	GTATTTATCACACGCTCGTC	V1A
YHR172W	SPC97	1	D1.1	AAGCTACCTGAATGAGCATC	TCTCTCAACGAAGACCATAA	AAGCTACCTGAATGAGCATC	TCTCTCAACGAAGACCATAA	V1A
YOL138C	RTC1	1	D1.1	GAGTAATCAGCATGGATGTC	GGGATTTAACCTCCACGTTC	GAGTAATCAGCATGGATGTC	GGGATTTAACCTCCACGTTC	V1A
YOL097C	WRS1	1	D1.1	CAGCGGTTGCTCACTGTTGT	CGAGAGATCGTATTACATGG	CAGCGGTTGCTCACTGTTGT	CGAGAGATCGTATTACATGG	V1A
YNR006W	VPS27	1	D1.1	CATGAATCACGAGGAAGGCC	TAACTGCACAGACGTGGTCC	CATGAATCACGAGGAAGGCC	TAACTGCACAGACGTGGTCC	V1A
YMR316W	DIA1	1	D1.1	TCGGACGTTATAGATGTGCT	CCCTCTCTAGGTACGTGGTT	TCGGACGTTATAGATGTGCT	CCCTCTCTAGGTACGTGGTT	V1A
YDR346C	SVF1	1	D1.1	AAGGCTGATCCATACGGCGT	GGATAGTTCCGTCACTCCTT	AAGGCTGATCCATACGGCGT	GGATAGTTCCGTCACTCCTT	V1A
YMR021C	MAC1	1	D1.1	GCGCGAGGAAGACATACCTA	GCCACTGACCAATAGCAGGA	GCGCGAGGAAGACATACCTA	GCCACTGACCAATAGCAGGA	V1A
YLR348C	DIC1	1	D1.1	GATCTATCGCTCGTCACGGT	TGGGTATCTCTCTGCAGCTT	GATCTATCGCTCGTCACGGT	TGGGTATCTCTCTGCAGCTT	V1A
YDR507C	GIN4	1	D1.1	AACCAGAGTTTCTAACCGCG	AACGACTACGGCACATATCG	AACCAGAGTTTCTAACCGCG	AACGACTACGGCACATATCG	V1A
YFL044C	OTU1	1	D1.1	TTGGAGTCACGTCCGCATCT	GAGCGGGTACTACTTCTGTT	TTGGAGTCACGTCCGCATCT	GAGCGGGTACTACTTCTGTT	V1A
YLR188W	MDL1	1	D1.1	CAGCAGTGCAAAGGTCTGAA	ATGACGGCTGCACTGTGTCT	CAGCAGTGCAAAGGTCTGAA	ATGACGGCTGCACTGTGTCT	V1A
YPR041W	TIF5	1	D1.1	CACCTGTTTCGAGGATTGGT	TACGGTCGGTCATTCCGCTT	CACCTGTTTCGAGGATTGGT	TACGGTCGGTCATTCCGCTT	V1A
YIL010W	DOT5	1	D1.1	GCTGAATGACCATGAAGAGC	CAGGAATGATAATTGCGGAC	GCTGAATGACCATGAAGAGC	CAGGAATGATAATTGCGGAC	V1A
YMR071C	TVP18	1	D1.1	GGTACTACTCTAGCCGATCT	CAAGCGTTAGTAGCTGTGTT	GGTACTACTCTAGCCGATCT	CAAGCGTTAGTAGCTGTGTT	V1A
YHR052W	CIC1	1	D1.1	CCTTTGATAGGATGTGCGAT	CATGACTACGCATTAGCGCG	CCTTTGATAGGATGTGCGAT	CATGACTACGCATTAGCGCG	V1A
YNL046W	#REF!	1	D1.1	TCGACGTGCATCCAGGAATG	GAATTGACGCCAAGCCACTA	TCGACGTGCATCCAGGAATG	GAATTGACGCCAAGCCACTA	V1A
YFL047W	RGD2	1	D1.1	TATGGCGTCTCAGCGTCTCT	TATGTCTCGCCAGCGTTGTG	TATGGCGTCTCAGCGTCTCT	TATGTCTCGCCAGCGTTGTG	V1A
YEL058W	PCM1	1	D1.1	CCGAGTAGCCAAGAGCATGA	TCGCTGAGGAAAGCACCACA	CCGAGTAGCCAAGAGCATGA	TCGCTGAGGAAAGCACCACA	V1A
YPL026C	SKS1	1	D1.1	CCTAGAGTCAGAGAGATTAG	GGGTATAACGGATATTCACG	CCTAGAGTCAGAGAGATTAG	GGGTATAACGGATATTCACG	V1A
YLR201C	COQ9	1	D1.1	ATAGCTGTCACACTTGCTCG	GCATCGTTTCAAGCGTCTGC	ATAGCTGTCACACTTGCTCG	GCATCGTTTCAAGCGTCTGC	V1A
YLR337C	VRP1	1	D1.1	AGTATTGCTCCAGACGCCTG	ATCTACGCGATCAGTGGCTG	AGTATTGCTCCAGACGCCTG	ATCTACGCGATCAGTGGCTG	V1A
YPR185W	ATG13	1	D1.1	GAATAGCAGTCAACGGCACC	GATAGATTACCAGACCTCTC	GAATAGCAGTCAACGGCACC	GATAGATTACCAGACCTCTC	V1A
YIL001W	#REF!	1	D1.1	CGTAACATCCCATTTGGTAG	CGCAGTCTCCGATTTACGTT	CGTAACATCCCATTTGGTAG	CGCAGTCTCCGATTTACGTT	V1A
YOL109W	ZEO1	1	D1.1	CGGCCCGTATTTGACATTAT	TAGGCGACCTGACTTCTACT	CGGCCCGTATTTGACATTAT	TAGGCGACCTGACTTCTACT	V1A
YBR034C	HMT1	1	D1.1	CCTTACGGTTAATGAGATGG	GCCCGGAGCCCAAATGTAAA	CCTTACGGTTAATGAGATGG	GCCCGGAGCCCAAATGTAAA	V1A
YLR424W	SPP382	1	D1.1	ATTCTGAGCGGTGCCATAGT	ATTCTGCGACGAGGCTCTTG	ATTCTGAGCGGTGCCATAGT	ATTCTGCGACGAGGCTCTTG	V1A
YBR156C	SLI15	1	D1.1	CCCGTCGGTCGATGCTATTT	CCGGGTATGTTACTAGAGTT	CCCGTCGGTCGATGCTATTT	CCGGGTATGTTACTAGAGTT	V1A
YBL067C	UBP13	1	D1.1	ATTAGTGACGCGGACCGACT	TGTCCACCAGTCCGATTATT	ATTAGTGACGCGGACCGACT	TGTCCACCAGTCCGATTATT	V1A
YMR143W	RPS16A	1	D1.1	ACCGCTGCCGGAGTTTGTTT	AGCCCTTTGGTCAGGTAGTT	ACCGCTGCCGGAGTTTGTTT	AGCCCTTTGGTCAGGTAGTT	V1A
YGL172W	NUP49	1	D1.1	CACCTCAACAGATATTGGGA	CCAATGTACGCCAAGGTATA	CACCTCAACAGATATTGGGA	CCAATGTACGCCAAGGTATA	V1A
YNL094W	APP1	1	D1.1	ATTACGTGGGCCATGACCCT	CTGGAGAGTATGGCTAACTT	ATTACGTGGGCCATGACCCT	CTGGAGAGTATGGCTAACTT	V1A
YCR030C	SYP1	1	D1.1	CCTATGATGGAATCTTGTGC	TCAGTCCAGATTGCCGAATT	CCTATGATGGAATCTTGTGC	TCAGTCCAGATTGCCGAATT	V1A
YPL269W	KAR9	1	D1.1	TTTCTATCGGGACGTGCGCT	TCCTACGGCGGTATGACGTT	TTTCTATCGGGACGTGCGCT	TCCTACGGCGGTATGACGTT	V1A
YLR419W	#REF!	1	D1.1	TAGCCAGTAACAGTAGGTCC	TGGGAAGACCCTCGAAATCC	TAGCCAGTAACAGTAGGTCC	TGGGAAGACCCTCGAAATCC	V1A
YPR152C	URN1	1	D1.1	GTAGTAGACCCATGACACTC	AAAGCAGGTGTCAGAACGTC	GTAGTAGACCCATGACACTC	AAAGCAGGTGTCAGAACGTC	V1A
YJR056C	#REF!	1	D1.1	TCAGGAGTGGAATGCACCTC	GCATGTAGACTAATCTCGTC	TCAGGAGTGGAATGCACCTC	GCATGTAGACTAATCTCGTC	V1A
YDR319C	YFT2	1	D1.1	GCATCTGCATAACTAGCATC	CCTCGATAGCAATGACCATA	GCATCTGCATAACTAGCATC	CCTCGATAGCAATGACCATA	V1A
YIR014W	#REF!	1	D1.1	CTTCGAGCGAGAGTATTATG	ATTGTCACGCGAGTCCACTG	CTTCGAGCGAGAGTATTATG	ATTGTCACGCGAGTCCACTG	V1A
YLR396C	VPS33	1	D1.1	GCCCGCTTTAGTAATATACG	ATAAGCTCTGGGAATAGCCG	GCCCGCTTTAGTAATATACG	ATAAGCTCTGGGAATAGCCG	V1A
YJL001W	PRE3	1	D1.1	GCTCATAACCGAGTGCCAGA	ATGGGACTCCTCATCATCTG	GCTCATAACCGAGTGCCAGA	ATGGGACTCCTCATCATCTG	V1A
YMR285C	NGL2	1	D1.1	ATATGCTGAACACCGAGGCC	GAGTACCCATAACTTGGTCC	ATATGCTGAACACCGAGGCC	GAGTACCCATAACTTGGTCC	V1A
YJL071W	ARG2	1	D1.1	AAACGCCTATGAGCTGTGCT	ACTGCGATGCTCGATTGGTT	AAACGCCTATGAGCTGTGCT	ACTGCGATGCTCGATTGGTT	V1A
YDL177C	#REF!	1	D1.1	TATGAGTCCAGACAGCTCGC	GGCTATCACCAATCATCAGA	TATGAGTCCAGACAGCTCGC	GGCTATCACCAATCATCAGA	V1A
YGR098C	ESP1	1	D1.1	TAGAGGTCTTGACACTGCGT	GGTGCGTTCATCGACTCCTT	TAGAGGTCTTGACACTGCGT	GGTGCGTTCATCGACTCCTT	V1A
YBR084C-A	RPL19A	1	D1.1	TTGTAAGGCTCGCTAACCCG	CATAGGTAGCGACACTAGCG	TTGTAAGGCTCGCTAACCCG	CATAGGTAGCGACACTAGCG	V1A
YDR447C	RPS17B	1	D1.1	CCCGGTCATTTAGGTAATCT	GAAGTTCAGGTCTCACTGTT	CCCGGTCATTTAGGTAATCT	GAAGTTCAGGTCTCACTGTT	V1A
YGR189C	CRH1	1	D1.1	AGCCACTATTGTAAGCCACG	AGCCACTGTTTAACCTATCG	AGCCACTATTGTAAGCCACG	AGCCACTGTTTAACCTATCG	V1A
YGL067W	NPY1	1	D1.1	ACTTGTAGAGTAGGGCATCT	ATCGAGCGCCGAGTTCTGTT	ACTTGTAGAGTAGGGCATCT	ATCGAGCGCCGAGTTCTGTT	V1A
YML030W	RCF1	1	D1.1	TAAGCTGTGCGAATGCTGTC	CCTTGAATAGAAGCGCAGAC	TAAGCTGTGCGAATGCTGTC	CCTTGAATAGAAGCGCAGAC	V1A
YPR189W	SKI3	1	D1.1	ACGCTCTTACGATGGTTGGT	TTATTGGTGACGCCGCGCTT	ACGCTCTTACGATGGTTGGT	TTATTGGTGACGCCGCGCTT	V1A
YOR337W	TEA1	1	D1.1	AAGCGTTACGAAGCGTTCCC	CGTACTCTTGCATCCGTAGT	AAGCGTTACGAAGCGTTCCC	CGTACTCTTGCATCCGTAGT	V1A
YOL089C	HAL9	1	D1.1	CATGAGTGAGAATGATCGAC	CACACGCTACCAAGTATGGA	CATGAGTGAGAATGATCGAC	CACACGCTACCAAGTATGGA	V1A
YNL108C	#REF!	1	D1.1	CCATGTAGGAAATCTTGGCA	CAGAGCTGCAAATGCTGGAA	CCATGTAGGAAATCTTGGCA	CAGAGCTGCAAATGCTGGAA	V1A
YER071C	TDA2	1	D1.1	AATCATCCGGCAGGTGCTTG	AGACGTTCTAGCACTCTATG	AATCATCCGGCAGGTGCTTG	AGACGTTCTAGCACTCTATG	V1A
YBL060W	YEL1	1	D1.1	TATGATCTGCGACTGCGGTT	TAGGTTCCGCTCCGACAGTT	TATGATCTGCGACTGCGGTT	TAGGTTCCGCTCCGACAGTT	V1A
YOR293W	RPS10A	1	D1.1	CCCGGATTATGATGACTTAT	GCGGAGTCTAGTTCAGTATT	CCCGGATTATGATGACTTAT	GCGGAGTCTAGTTCAGTATT	V1A
YHR146W	CRP1	1	D1.1	TATACGATGACAGAGTGTGC	TAGACGTACACATGAGCCGC	TATACGATGACAGAGTGTGC	TAGACGTACACATGAGCCGC	V1A
YLR222C	UTP13	1	D1.1	GAGCGTTACGGACCTTATTT	ATGGATCTGGTCACCGAGTT	GAGCGTTACGGACCTTATTT	ATGGATCTGGTCACCGAGTT	V1A
YMR244C-A	COA6	1	D1.1	CACGACTGTGAACTATCATC	GCCCATCGTGAAGAATGTTA	CACGACTGTGAACTATCATC	GCCCATCGTGAAGAATGTTA	V1A
YFR019W	FAB1	1	D1.1	AAGACGTGCCAACTATGCTA	GCCCACATCTATACAATGGA	AAGACGTGCCAACTATGCTA	GCCCACATCTATACAATGGA	V1A
YLR347C	KAP95	1	D1.1	CAGAGGCTGGTACGTCGACT	CCAATCCGGTTGCACTTATT	CAGAGGCTGGTACGTCGACT	CCAATCCGGTTGCACTTATT	V1A
YNR054C	ESF2	1	D1.1	GGGCCAGCAACAGATCGTCA	AGCTCATACCGCTTCATGGT	GGGCCAGCAACAGATCGTCA	AGCTCATACCGCTTCATGGT	V1A
YGL180W	ATG1	1	D1.1	TGCCTACCAACCTATAGGAC	GGCCACCGTTACAACTTATA	TGCCTACCAACCTATAGGAC	GGCCACCGTTACAACTTATA	V1A
YNL238W	KEX2	1	D1.1	AGAGCGCAGTCAGATTCATG	TATCAGTCCACACGTATGCG	AGAGCGCAGTCAGATTCACG	TATCAGTCCACACGTATGCG	V1A
YHR127W	#REF!	1	D1.1	TTATTGACTGGCACGGCCCT	TTCGAGCGTCTGGCACACTT	TTATTGACTGGCACGGCCCT	TTCGAGCGTCTGGCACACTT	V1A
YLR247C	IRC20	1	D1.1	TATCTTCGTAGAGGTGCGCT	TATGTGCTGCGAGCTACGTT	TATCTTCGTAGAGGTGCGCT	TATGTGCTGCGAGCTACGTT	V1A
YOR260W	GCD1	1	D1.1	GCACCGAGTAGATAGCATCG	CACGCGATTGAATTTACTGC	GCACCGAGTAGATAGCATCG	CACGCGATTGAATTTACTGC	V1A
YKL011C	CCE1	1	D1.1	GATTAGGAGCCACTACACTC	CCTAGCTGCATAAGTACGTC	NA	NA	V1A
YDL123W	SNA4	1	D1.1	TAAGCCTCGATAAGGACCTC	AAAGAATACGCATGGTCGTC	TAAGCCTCGATAAGGACCTC	AAAGAATACGCATGGTCGTC	V1A
YHR057C	CPR2	1	D1.1	TTTCACATCAGCGAAGATAC	GGTAACACTATCTCAAGACC	TTTCACATCAGCGAAGATAC	GGTAACACTATCTCAAGACC	V1A
YJL102W	MEF2	1	D1.1	TATAAAGATTGGGCAACGCC	TTAGGGAAGCCATTCGCTCA	TATAAAGATTGGGCAACGCC	TTAGGGAAGCCATTCGCTCA	V1A
YGR135W	PRE9	1	D1.1	TGGCACCACCAATGAGCAGA	AAGCTCGCATGACCGATCTG	TGGCACCACCAATGAGCAGA	AAGCTCGCATGACCGATCTG	V1A
YGL216W	KIP3	1	D1.1	GATGGCACCCTTGCATTGCT	AGCAGGCTTGTCACTTGGTT	GATGGCACCCTTGCATTGCT	AGCAGGCTTGTCACTTGGTT	V1A
YLR093C	NYV1	1	D1.1	TAGCGACCTTGCCTAATCGT	TAAAGTAGCGTGACCTCCTT	TAGCGACCTTGCCTAATCGT	TAAAGTAGCGTGACCTCCTT	V1A
YBL057C	PTH2	1	D1.1	AAATAGCCAGTGCCACATCT	AACTCCGCGTGAGGACTGTT	AAATAGCCAGTGCCACATCT	AACTCCGCGTGAGGACTGTT	V1A
YOL057W	#REF!	1	D1.1	TACCAGGATGAGTAAGACCG	CTGCACATTCGATTACAGCG	TACCAGGATGAGTAAGACCG	CTGCACATTCGATTACAGCG	V1A
YPL086C	ELP3	1	D1.1	ATATCTGAGACACGCCGCGC	CGGACTCTGTAAGTCTATCG	ATATCTGAGACACGCCGCGC	CGGACTCTGTAAGTCTATCG	V1A
YOL070C	NBA1	1	D1.1	GCATAGGATATAAGGCTGTC	GCCACTAGATTCAAGCAGAC	GCATAGGATATAAGGCTGTC	GCCACTAGATTCAAGCAGAC	V1A
YOR334W	MRS2	1	D1.1	ATCTGAGTACGATGGCTGAT	CTATCTGCGATCAGTTTGTG	ATCTGAGTACGATGGCTGAT	CTATCTGCGATCAGTTTGTG	V1A
YPR116W	RRG8	1	D1.1	ATTGCACCGTGTTAGCATGT	AGTGCGTACCTATCGCGCTT	NA	NA	V1A
YBL076C	ILS1	1	D1.1	AATGAGCCGCAAGCCACGTA	GCTCATGGACAATAACCTCA	AATGAGCCGCAAGCCACGTA	GCTCATGGACAATAACCTCA	V1A
YOR199W	#REF!	1	D1.1	GAAGTTCATGTCACGGATCT	CGACCACTCCTGATATTGTT	GAAGTTCATGTCACGGATCT	CGACCACTCCTGATATTGTT	V1A
YNL141W	AAH1	1	D1.1	AGCGTTTGAAGCACGATTAG	GCAGCTTTATACATTTCACG	AGCGTTTGAAGCACGATTAG	GCAGCTTTATACATTTCACG	V1A
YIL119C	RPI1	1	D1.1	TATACGGTCATCATGGTCTG	AGTCATACTCCACTGTTCTG	TATACGGTCATCATGGTCTG	AGTCATACTCCACTGTTCTG	V1A
YOL009C	MDM12	1	D1.1	CCATCTTAGTAACGTGGACG	CACTTGAGGTTGCGGAATTT	CCATCTTAGTAACGTGGACG	CACTTGAGGTTGCGGAATTT	V1A
YGR161C	RTS3	1	D1.1	TATCTGCGGCTCACTGTCGT	CGCGACGATGTATGCTAATA	TATCTGCGGCTCACTGTCGT	CGCGACGATGTATGCTAATA	V1A
YLL027W	ISA1	1	D1.1	ATTTCTCGCGTCACCGGGTT	GTAATCACTCGTTCCCAGTT	ATTTCTCGCGTCACCGGGTT	GTAATCACTCGTTCCCAGTT	V1A
YJR025C	BNA1	1	D1.1	AAGCTCTCATCAGGAGTGTG	ACCTGATGGTACATGAGATG	AAGCTCTCATCAGGAGTGTG	ACCTGATGGTACATGAGATG	V1A
YBL102W	SFT2	1	D1.1	AAGGCTCTCTCCATGCTTAT	CCGTGTCGATGATGAGTATT	AAGGCTCTCTCCATGCTTAT	CCGTGTCGATGATGAGTATT	V1A
YKR021W	ALY1	1	D1.1	GCTTCCTAGAAAGGGACTAA	GGTTATACTTCACTACCGCT	GCTTCCTAGAAAGGGACTAA	GGTTATACTTCACTACCGCT	V1A
YLR421C	RPN13	1	D1.1	ATGCTTCAGGGCCGACCTTT	AAAGCTCACTGCTCCGAGTT	ATGCTTCAGGGCCGACCTTT	AAAGCTCACTGCTCCGAGTT	V1A
YDL161W	ENT1	1	D1.1	CACGATGTCTAATCATGCTA	CTGCCAAGCAACTTAATGCA	CACGATGTCTAATCATGCTA	CTGCCAAGCAACTTAATGCA	V1A
YNL103W	MET4	1	D1.1	TAGAACTGTGCATGTGGACT	ACTGAGCCTCTCGACTTATT	TAGAACTGTGCATGTGGACT	ACTGAGCCTCTCGACTTATT	V1A
YAL049C	AIM2	1	D1.1	GCTCCCACAGTAAGTTAAGC	TTCCGTTGAACAAGGGAGAA	GCTCCCACAGTAAGTTAAGC	TTCCGTTGAACAAGGGAGAA	V1A
YML093W	UTP14	1	D1.1	GTATCGTAAACATGCGTGGA	CCGAACAGGGTTGGAAACTA	GTATCGTAAACATGCGTGGA	CCGAACAGGGTTGGAAACTA	V1A
YDR400W	URH1	1	D1.1	CATTATGCACGATGGATGCG	TATCAGCGGCCATGTTGCAG	NA	NA	V1A
YDR051C	DET1	1	D1.1	CATTATGCACGATGGATGCG	TATCAGCGGCTATGTTGCAG	NA	NA	V1A
YDR458C	HEH2	1	D1.1	AATGATTGGTCCATCTCCCT	CGGATTGACGTTTCACACTT	AATGATTGGTCCATCTCCCT	CGGATTGACGTTTCACACTT	V1A
YBR252W	DUT1	1	D1.1	AGTTTCATCACCGGATCGCT	TTCGGCTGGCGATTACCGTT	AGTTTCATCACCGGATCGCT	TTCGGCTGGCGATTACCGTT	V1A
YDL095W	PMT1	1	D1.1	GACGTGGTACCATTGCATCG	TACCATGACGCACGAGAGAG	GACGTGGTACCATTGCATCG	TACCATGACGCACGAGAGAG	V1A
YBL026W	LSM2	1	D1.1	GCCATAGTGAAACATCGCCA	CATCTGTCAGCATCTGTGGG	GCCATAGTGAAACATCGCCA	CATCTGTCAGCATCTGTGGG	V1A
YGL099W	LSG1	1	D1.1	GCATGGAGTACAAGCTATGA	GCCTCGTCGAAATTATCACA	GCATGGAGTACAAGCTATGA	GCCTCGTCGAAATTATCACA	V1A
YBR143C	SUP45	1	D1.1	GAAGAGCTAGTAACTCCTCC	TAAACCAGCGTCCGAAGGTC	NA	NA	V1A
YDR272W	GLO2	1	D1.1	GCGCAGAGTATAATATGCTC	TGAGTCAACATCTTCGCAAC	GCGCAGAGTATAATATGCTC	TGAGTCAACATCTTCGCAAC	V1A
YMR281W	GPI12	1	D1.1	ATCGTACTGACATTGACCGC	TAACATGACTGGACAGAGCG	ATCGTACTGACATTGACCGC	TAACATGACTGGACAGAGCG	V1A
YDR033W	MRH1	1	D1.1	ATCATCGGGCCAGTTCGTTG	GCTACGTCATGTCACTCAAT	ATCATCGGGCCAGTTCGTTG	GCTACGTCATGTCACTCAAT	V1A
YBL007C	SLA1	1	D1.1	TTCGTCACGGGCAGATTGCT	AATCGAGTCTGACGTTGGTT	TTCGTCACGGGCAGATTGCT	AATCGAGTCTGACGTTGGTT	V1A
YHR133C	NSG1	1	D1.1	GCTGGCCGCAAATCAGGAAA	TCACCCTAGTGCTATATTGG	GCTGGCCGCAAATCAGGAAA	TCACCCTAGTGCTATATTGG	V1A
YCR069W	CPR4	1	D1.1	AGTCAGGTTATGGCACATCT	ACGTTAGCCTGACTACTGTT	AGTCAGGTTATGGCACATCT	ACGTTAGCCTGACTACTGTT	V1A
YLR211C	#REF!	1	D1.1	CCTGACTACCAATGCAAGGA	TGTCCACGCATAAACAGGCA	CCTGACTACCAATGCAAGGA	TGTCCACGCATAAACAGGCA	V1A
YIL071C	PCI8	1	D1.1	GCCATATACTAAGACCTTGC	GATTGCTATACAGTCCCACA	GCCATATACTAAGACCTTGC	GATTGCTATACAGTCCCACA	V1A
YDR239C	#REF!	1	D1.1	TACGCTTACGGACTGTCGGT	ATTCGCTGACGTAGGAGCTT	TACGCTTACGGACTGTCGGT	ATTCGCTGACGTAGGAGCTT	V1A
YFR026C	ULI1	1	D1.1	CACTGTGAGTAATGATGACG	ATACACATCGGGTTAAGCGG	CACTGTGAGTAATGATGACG	ATACACATCGGGTTAAGCGG	V1A
YKL014C	URB1	1	D1.1	CGTAGGATACTGGATCATCT	ACTTCAGCCTGGCGAGTGTT	CGTAGGATACTGGATCATCT	ACTTCAGCCTGGCGAGTGTT	V1A
YBR181C	RPS6B	1	D1.1	TTATGGCGCTCACCGCTGAT	GCACGAGTTGCATATTTGTG	TTATGGCGCTCACCGCTGAT	GCACGAGTTGCATATTTGTG	V1A
YNL169C	PSD1	1	D1.1	ATTCTAGCGAGCCCGGATCT	CCGTAGCTGCGAGTATTGGT	ATTCTAGCGAGCCCGGATCT	CCGTAGCTGCGAGTATTGGT	V1A
YBR207W	FTH1	1	D1.1	AGGCATTTGTCACACTGGTG	ACAGACATTGGAAGCTATGC	AGGCATTTGTCACACTGGTG	ACAGACATTGGAAGCTATGC	V1A
YNL320W	#REF!	1	D1.1	TAGCGTCACCGACTGTCTTG	CGAGGTACGATTGACTAATT	TAGCGTCACCGACTGTCTTG	CGAGGTACGATTGACTAATT	V1A
YLR251W	SYM1	1	D1.1	CACTCCAGGTTATGTAATCG	TACATCGTAGAGACGTGTCG	CACTCCAGGTTATGTAATCG	TACATCGTAGAGACGTGTCG	V1A
YNL008C	ASI3	1	D1.1	GCTAATGCACGTTATGGAAG	GTATAGACACTGACGGACAA	NA	NA	V1A
YMR172W	HOT1	1	D1.1	ACCGTCGTTGCATAGTGGTT	ACGTCTAGCTTTAGCCAGTT	ACCGTCGTTGCATAGTGGTT	ACGTCTAGCTTTAGCCAGTT	V1A
YPR169W	JIP5	1	D1.1	CACCGTGGGTTAAGAGTTAT	GACCTACCTTTCGACGTATT	CACCGTGGGTTAAGAGTTAT	GACCTACCTTTCGACGTATT	V1A
YIR036C	IRC24	1	D1.1	ACTGAGTGGCGATGTCCTTT	TCCTACTTTGGGAGCGAGTT	ACTGAGTGGCGATGTCCTTT	TCCTACTTTGGGAGCGAGTT	V1A
YMR295C	#REF!	1	D1.1	ACACGATAGGTAGAGTGACT	GACCTCTCGGCATACTTATT	ACACGATAGGTAGAGTGACT	GACCTCTCGGCATACTTATT	V1A
YOL067C	RTG1	1	D1.1	GCGGAACACTTCTTAAACAC	TCGCCCTAGAAACACGGGAA	GCGGAACACTTCTTAAACAC	TCGCCCTAGAAACACGGGAA	V1A
YDR425W	SNX41	1	D1.1	TATACTGTTCGCAGGCCGCT	ACATGACTCGTTGACACGTT	TATACTGTTCGCAGGCCGCT	ACATGACTCGTTGACACGTT	V1A
YER163C	GCG1	1	D1.1	CCACGGAGAACATATCCTGA	GTCCACATGAACGCAAGCTA	NA	NA	V1A
YFL025C	BST1	1	D1.1	TATGTATGCCCAGCCATGCG	CCTATAATGCCATGTGATGC	TATGTATGCCCAGCCATGCG	CCTATAATGCCATGTGATGC	V1A
YNL086W	SNN1	1	D1.1	GAGCTTGATGCACTTTCCCT	CCCTGGATCTTTAGACACTT	GAGCTTGATGCACTTTCCCT	CCCTGGATCTTTAGACACTT	V1A
YLR170C	APS1	1	D1.1	GGGATATAACTAAGGCTTCC	TTTAGTAGGACACCGGCCTC	GGGATATAACTAAGGCTTCC	TTTAGTAGGACACCGGCCTC	V1A
YGL126W	SCS3	1	D1.1	GGACTGACACTCTCACATAG	TATAGTGAGCCACAGTCCGC	GGACTGACACTCTCACATAG	TATAGTGAGCCACAGTCCGC	V1A
YER131W	RPS26B	1	D1.1	TAGAGCCTCAGCATTCATCG	CACTATCGAGTAATGGAGAG	TAGAGCCTCAGCATTCATCG	CACTATCGAGTAATGGAGAG	V1A
YFL060C	SNO3	1	D1.1	GGGAAATATAAATCTGGCCC	AAGGAAGAGTCCCTCAATCA	GGGAAATATAAATCTGGCCC	AAGGAAGAGTCCCTCAATCA	V1A
YNL239W	LAP3	1	D1.1	ATGGCGATTGAACGAGCCTC	ACGTAAGCTAGAGTAAGGTC	ATGGCGATTGAACGAGCCTC	ACGTAAGCTAGAGTAAGGTC	V1A
YGL245W	GUS1	1	D1.1	TTGAGGAGACCACTTACGCC	TATACGCACAAAGAGTCTCC	TTGAGGAGACCACTTACGCC	TATACGCACAAAGAGTCTCC	V1A
YLL013C	PUF3	1	D1.1	ATGTAGTCCGGCCACTTGCT	CGGATACCTTTACCCATGTT	ATGTAGTCCGGCCACTTGCT	CGGATACCTTTACCCATGTT	V1A
YOR266W	PNT1	1	D1.1	TGGCAGAGCAAATCCCGCAA	TACGCTGTGACATGAGCCTT	TGGCAGAGCAAATCCCGCAA	TACGCTGTGACATGAGCCTT	V1A
YOL113W	SKM1	1	D1.1	GCCCAGGTAGTACAGTTACG	ATAGTGCCCGTAAGTCTCCG	GCCCAGGTAGTACAGTTACG	ATAGTGCCCGTAAGTCTCCG	V1A
YBR129C	OPY1	1	D1.1	ACAAGCGATTTGCATCTCGT	GTCAGCGGTCGATTCTCCTT	ACAAGCGATTTGCATCTCGT	GTCAGCGGTCGATTCTCCTT	V1A
YDR422C	SIP1	1	D1.1	AGAGATTCGCTCAACGCCCG	CAATGGTCGGTAATCACGCG	AGAGATTCGCTCAACGCCCG	CAATGGTCGGTAATCACGCG	V1A
YKL096W	CWP1	1	D1.1	TGTCAGACCTTGCTACATCT	AGCTGACCCGTCGTACTGTT	TGTCAGACCTTGCTACATCT	AGCTGACCCGTCGTACTGTT	V1A
YLL034C	RIX7	1	D1.1	ATCTACCTATCCGGGAGGGT	CTGCGATGACTGATGAGCTT	ATCTACCTATCCGGGAGGGT	CTGCGATGACTGATGAGCTT	V1A
YDR122W	KIN1	1	D1.1	ACAACGGGTTCTAACTCGCG	ATGGACATGCTTTGAACTCG	ACAACGGGTTCTAACTCGCG	ATGGACATGCTTTGAACTCG	V1A
YDL033C	SLM3	1	D1.1	TTACGGACTCTGACCCATCT	CGGATTGACTGATACGTGTT	TTACGGACTCTGACCCATCT	CGGATTGACTGATACGTGTT	V1A
YMR102C	#REF!	1	D1.1	TAGAGTATCCCACGACATGC	GCTGAGATTAAAGTCCAGGA	TAGAGTATCCCACGACATGC	GCTGAGATTAAAGTCCAGGA	V1A
YJL217W	REE1	1	D1.1	ATCATCGACCGAGGCTTGTG	ATATCTGCGCCAGTGCGATG	ATCATCGACCGAGGCTTGTG	ATATCTGCGCCAGTGCGATG	V1A
YGR001C	#REF!	1	D1.1	CCTCCGTAGGGATCGTATGC	GATTTCGCGCTACGTCGCTT	CCTCCGTAGGGATCGTATGC	GATTTCGCGCTACGTCGCTT	V1A
YKL105C	SEG2	1	D1.1	CTATCAAGGCAAGCGATCTA	GCAGAGTTGACAATACTGGA	CTATCAAGGCAAGCGATCTA	GCAGAGTTGACAATACTGGA	V1A
YMR175W	SIP18	1	D1.1	TATCTGTAGGTCAGGGATCT	TTCGGCGACCTCGACTTGTT	TATCTGTAGGTCAGGGATCT	TTCGGCGACCTCGACTTGTT	V1A
YMR268C	PRP24	1	D1.1	CATTCATTGTGAGCATGGTG	GATAGTATTCACACCCATGC	CATTCATTGTGAGCATGGTG	GATAGTATTCACACCCATGC	V1A
YIL042C	PKP1	1	D1.1	TGATGTAGGACAGCCACCAC	GCCCACAGCAGAATTTAGCA	TGATGTAGGACAGCCACCAC	GCCCACAGCAGAATTTAGCA	V1A
YKL072W	STB6	1	D1.1	ATATGCGTCCCATCAGTGCG	AGATGCACTCTAACCGTCAG	ATATGCGTCCCATCAGTGCG	AGATGCACTCTAACCGTCAG	V1A
YIL018W	RPL2B	1	D1.1	ATGTACCCAGTCACACTTAG	GAGATCGCTACATTTAGACG	ATGTACCCAGTCACACTTAG	GAGATCGCTACATTTAGACG	V1A
YOR264W	DSE3	1	D1.1	TTTCACTGGAGCGAGCTTTG	TATCCTAGGGTAGTGCAGCT	TTTCACTGGAGCGAGCTTTG	TATCCTAGGGTAGTGCAGCT	V1A
YOR307C	SLY41	1	D1.1	CCCGTACTAGCATTTAATCC	GAAACAACTACAGCGCGTCG	CCCGTACTAGCACTTAATCC	GAAACAACTACAGCGCGTCG	V1A
YNL049C	SFB2	1	D1.1	ATTGCTAGACGCCCGCGAAT	ATATACTGTGGCATGGGCCT	ATTGCTAGACGCCCGCGAAT	ATATACTGTGGCATGGGCCT	V1A
YNR032W	PPG1	1	D1.1	GAGACAGGAGCATATTGTAC	AGCTGATAATTCAAGGCACC	GAGACAGGAGCATATTGTAC	AGCTGATAATTCAAGGCACC	V1A
YMR164C	MSS11	1	D1.1	CGCACGCTCTGCATTGATAT	CGATGTAGCTCCATTCTATG	CGCACGCTCTGCATTGATAT	CGATGTAGCTCCATTCTATG	V1A
YGL080W	FMP37	1	D1.1	AGGGTGCCTCTCCTCATGTT	ATGTTGTCAGCCCGCCAGTT	AGGGTGCCTCTCCTCATGTT	ATGTTGTCAGCCCGCCAGTT	V1A
YFL021W	GAT1	1	D1.1	GCCGCGTGATGACTATTTAT	TATGCTTAGGGAGCCGTATT	GCCGCGTGATGACTATTTAT	TATGCTTAGGGAGCCGTATT	V1A
YKL007W	CAP1	1	D1.1	TATCTCGCTGGACGGGCTTT	AATGATTCAGTCCGCGAGTT	TATCTCGCTGGACGGGCTTT	AATGATTCAGTCCGCGAGTT	V1A
YKL205W	LOS1	1	D1.1	CGCTAGAGGTCATTCATACT	GGACGCTTTAGACCCTTATT	CGCTAGAGGTCATTCATACT	GGACGCTTTAGACCCTTATT	V1A
YGR123C	PPT1	1	D1.1	ACATGCCAGTAATGGTGCAG	AGATATTGACCACCATCAGT	ACATGCCAGTAATGGTGCAG	AGATATTGACCACCATCAGT	V1A
YLR414C	PUN1	1	D1.1	TACATGCTGGCAGGTAGCCT	ACGCGGAGTTCTGGACACTT	TACATGCTGGCAGGTAGCCT	ACGCGGAGTTCTGGACACTT	V1A
YDR453C	TSA2	1	D1.1	CCGATTAGTTTACAGTCGCT	ACTCGTGTCATATAGCCGTT	CCGATTAGTTTACAGTCGCT	ACTCGTGTCATATAGCCGTT	V1A
YDR074W	TPS2	1	D1.1	ACATCTGCGAAATGCGGCCA	CCATGCTGTACCATATTGGG	ACATCTGCGAAATGCGGCCA	CCATGCTGTACCATATTGGG	V1A
YDL099W	BUG1	1	D1.1	GCAACAAATGAATGGCTTCC	GACCTCACATTGACCATAAG	GCAACAAATGAATGGCTTCC	GACCTCACATTGACCATAAG	V1A
YHR113W	APE4	1	D1.1	GTGAGACATATAACCTCCGC	GATACGCTACCATTAGAGAG	GTGAGACATATAACCTCCGC	GATACGCTACCATTAGAGAG	V1A
YNL300W	TOS6	1	D1.1	TATCGGGCTAGGGTCTTGCT	ACGTCCTCGATTGCCATGTT	TATCGGGCTAGGGTCTTGCT	ACGTCCTCGATTGCCATGTT	V1A
YML054C	CYB2	1	D1.1	GATGCACTGCGTTCCATGTT	ACTGAGTGTGAATCATGGTC	GATGCACTGCGTTCCATGTT	ACTGAGTGTGAATCATGGTC	V1A
YJL137C	GLG2	1	D1.1	CATCGAGAGGCAGATTTACG	GGGAAGAAATTAACCGTCCG	CATCGAGAGGCAGATTTACG	GGGAAGAAATTAACCGTCCG	V1A
YDR070C	FMP16	1	D1.1	ATTGATGATGCCCGCGTCGT	TTTGCGGCGATAGCGTCCTT	ATTGATGATGCCCGCGTCGT	TTTGCGGCGATAGCGTCCTT	V1A
YHR097C	#REF!	1	D1.1	CATGCTAGAGTGGTACATCT	TAGAGTGAGCGATCCCTGTT	CATGCTAGAGTGGTACATCT	TAGAGTGAGCGATCCCTGTT	V1A
YOR350C	MNE1	1	D1.1	CAACGACTTCGATGACGGGT	ACTTGTTGCAGAGTGAGCTT	CAACGACTTCGATGACGGGT	ACTTGTTGCAGAGTGAGCTT	V1A
YBR273C	UBX7	1	D1.1	ACTATATGCTAGACGAGCGG	AAGTATCTCTACACGCCGGG	ACTATATGCTAGACGAGCGG	AAGTATCTCTACACGCCGGG	V1A
YKL048C	ELM1	1	D1.1	GATCCACAAATAATCTCGCG	GTAGCATACTTCCTAACTCG	GATCCACAAATAATCTCGCG	GTAGCATACTTCCTAACTCG	V1A
YOR373W	NUD1	1	D1.1	AGGGCTTCATTACCTCATCT	TTGATCGACTCCCGCGTGTT	AGGGCTTCATTACCTCATCT	TTGATCGACTCCCGCGTGTT	V1A
YHR166C	CDC23	1	D1.1	TGATATGTGACACGCTTGTA	CTACGCTAGAGAGCTTTGCG	TGATATGTGACACGCTTGTA	CTACGCTAGAGAGCTTTGCG	V1A
YPL125W	KAP120	1	D1.1	GAATGCCTTCTCACTACTGT	TCTGTACGGCTAGGTCGCTT	GAATGCCTTCTCACTACTGT	TCTGTACGGCTAGGTCGCTT	V1A
YBR187W	GDT1	1	D1.1	AGATCCCGCGTCAGGCATAT	GCACCGTGATCCAGTATATA	AGATCCCGCGTCAGGCATAT	GCACCGTGATCCAGTATATA	V1A
YOR288C	MPD1	1	D1.1	TTCTGACGACGAGCGTACTG	TATCTCGGGCCATCTGGGAT	TTCTGACGACGAGCGTACTG	TATCTCGGGCCATCTGGGAT	V1A
YPL180W	TCO89	1	D1.1	TAGTGTGCTACAGCCTCTCG	GCACTCATCATCAGCAGGAG	TAGTGTGCTACAGCCTCTCG	GCACTCATCATCAGCAGGAG	V1A
YLL060C	GTT2	1	D1.1	ATTAGGCGACCACGAGCTTC	TTCACAGGCCAGGACACAAG	ATTAGGCGACCACGAGCTTC	TTCACAGGCCAGGACACAAG	V1A
YGL203C	KEX1	1	D1.1	AGCTACAGGTTCGCTAACAT	ACGGCGATGATATAGGTCCT	AGCTACAGGTTCGCTAACAT	ACGGCGATGATATAGGTCCT	V1A
YAR062W	#REF!	1	D1.1	AGTACACCCGACCAGTGAAG	GCTCACAGGATTAAGTACAG	AGTACACCCGACCAGTGAAG	GCTCACAGGATTAAGTACAG	V1A
YOL137W	BSC6	1	D1.1	CCTTCTTGAGGATGTGAGAT	ATCCATTGAATCCATGTGGC	CCTTCTTGAGGATGTGAGAT	ATCCATTGAATCCATGTGGC	V1A
YOR367W	SCP1	1	D1.1	CCTCCGGTGCGAGTTATGTT	GAGTTTGACCTCCTCCAGTT	CCTCCGGTGCGAGTTATGTT	GAGTTTGACCTCCTCCAGTT	V1A
YMR181C	#REF!	1	D1.1	AGATGGCCGCTCCTCAGATT	GCCATAACCAGACAGGCGTA	AGATGGCCGCTCCTCAGATT	GCCATAACCAGACAGGCGTA	V1A
YBL091C	MAP2	1	D1.1	ACAGTTTGGTAAGGCTCCTG	TTCAGGACCGTATTGTGCTG	ACAGTTTGGTAAGGCTCCTG	TTCAGGACCGTATTGTGCTG	V1A
YER143W	DDI1	1	D1.1	CCCGCGTCGGCATTGTTTAC	TCGGACTACTGACTCGTATT	CCCGCGTCGGCATTGTTTAC	TCGGACTACTGACTCGTATT	V1A
YJR132W	NMD5	1	D1.1	GCGCGTGCATCATTCCTTAT	ATTGTGCGTACACTGCCCTG	GCGCGTGCATCATTCCTTAT	ATTGTGCGTACACTGCCCTG	V1A
YCL028W	RNQ1	1	D1.1	GGAGCCTGTAGATCCTCTTT	CGGCATCTTGTCCAGGAGTT	GGAGCCTGTAGATCCTCTTT	CGGCATCTTGTCCAGGAGTT	V1A
YOL129W	VPS68	1	D1.1	CGCATGGACAAACACTGGCA	TGACGTAGCCGATGTGCTCT	CGCATGGACAAACACTGGCA	TGACGTAGCCGATGTGCTCT	V1A
YJR113C	RSM7	1	D1.1	AGAGAGCGACGGATACTACT	CTACTTGCGGGAGAGTTATT	AGAGAGCGACGGATACTACT	CTACTTGCGGGAGAGTTATT	V1A
YEL070W	DSF1	1	D1.1	GAAGAGTTATCAACCGGGAC	TGTTAAACCAACGGCCTACA	GAAGAGTTATCAACCGGGAC	TGTTAAACCAACGGCCTACA	V1A
YGR269W	#REF!	1	D1.1	TGCAGAACAGCAAGTTTGGA	TCCTAACACACAGTGAACTA	TGCAGAACAGCAAGTTTGGA	TCCTAACACACAGTGAACTA	V1A
YJL066C	MPM1	1	D1.1	AATTTAGGGTCACGCCGCCT	GGCTCGTATAGTTGACACTT	AATTTAGGGTCACGCCGCCT	GGCTCGTATAGTTGACACTT	V1A
YNL308C	KRI1	1	D1.1	GGGTTGCACCTAACTTACTC	TATGGAGACCTACCCGGTTC	GGGTTGCACCTAACTTACTC	TATGGAGACCTACCCGGTTC	V1A
YLR258W	GSY2	1	D1.1	TATCTCGACGCAGTGTCAGG	ACTGACTCATAAGGGATTGC	TATCTCGACGCAGTGTCAGG	ACTGACTCATAAGGGATTGC	V1A
YIL135C	VHS2	1	D1.1	ATCATTCTGGGACATGGATG	CTGAGCATTAGCATTGATCG	ATCATTCTGGGACATGGATG	CTGAGCATTAGCATTGATCG	V1A
YPR105C	COG4	1	D1.1	TAATGCCGACTTTACCGCGT	AATTTCCCGTCAGGGCGGAT	TAATGCCGACTTTACCGCGT	AATTTCCCGTCAGGGCGGAT	V1A
YDR186C	#REF!	1	D1.1	TGCTGACACCAAGGACCAGA	TTGATCGCGCTGGACATCTG	TGCTGACACCAAGGACCAGA	TTGATCGCGCTGGACATCTG	V1A
YPR075C	OPY2	1	D1.1	GAATTACCAGGAACCGAGCC	AAGGCGACGGAAGTATATCC	GAATTACCAGGAACCGAGCC	AAGGCGACGGAAGTATATCC	V1A
YMR092C	AIP1	1	D1.1	TCCTAGTACACAGCGAGTGC	ATAGCTGTCGAATTGCGTGC	TCCTAGTACACAGCGAGTGC	ATAGCTGTCGAATTGCGTGC	V1A
YOR296W	#REF!	1	D1.1	GCCTGATCTGCAATCTATAC	CTGAGAGAGGAACATCGACC	GCCTGATCTGCAATCTATAC	CTGAGAGAGGAACATCGACC	V1A
YNL260C	LTO1	1	D1.1	GATTAGAGCCACCTAGTCGC	GACAGAAGATCCATTCGGAG	GATTAGAGCCACCTAGTCGC	GACAGAAGATCCATTCGGAG	V1A
YBR048W	RPS11B	1	D1.1	TTTCCAAACAAAGATGGGCC	GGAGACCATGAACCGATTCC	TTTCCAAACAAAGATGGGCC	GGAGACCATGAACCGATTCC	V1A
YDR152W	GIR2	1	D1.1	TGAGTTCCTGCACCGTTGCT	GCAGTAGCTTTAGGCATGTT	TGAGTTCCTGCACCGTTGCT	GCAGTAGCTTTAGGCATGTT	V1A
YLL023C	POM33	1	D1.1	CACTGATGGCGATGATTCGT	TACGTCTTGAGAGGGTCCTT	CACTGATGGCGATGATTCGT	TACGTCTTGAGAGGGTCCTT	V1A
YBL036C	#REF!	1	D1.1	AGAAGGGCATTGGACCATCT	ACTAGCGCGTAGAGCCTGTT	AGAAGGGCATTGGACCATCT	ACTAGCGCGTAGAGCCTGTT	V1A
YGR187C	HGH1	1	D1.1	TGACGTGGGAGCTACTCGAT	ATATCTTCGAGAGGCGCATG	TGACGTGGGAGCTACTCGAT	ATATCTTCGAGAGGCGCATG	V1A
YJL097W	PHS1	1	D1.1	TTACCTCTGCGATAGCGGGT	AGTAGGCTTGTGCATAGCTT	TTACCTCTGCGATAGCGGGT	AGTAGGCTTGTGCATAGCTT	V1A
YOR128C	ADE2	1	D1.1	GACTGGTCATCATCTCATCT	ACCCTTGAGTTCGAGGTGTT	GACTGGTCATCATCTCATCT	ACCCTTGAGTTCGAGGTGTT	V1A
YOR021C	SFM1	1	D1.1	TATGGCAGCCTCAGCTTGTG	AGCATCGAGTGTAATTTGCA	TATGGCAGCCTCAGCTTGTG	AGCATCGAGTGTAATTTGCA	V1A
YMR218C	TRS130	1	D1.1	ATTGTTTCCCGGACGCCTGT	CGGGTACGGATACTTCGCTT	ATTGTTTCCCGGACGCCTGT	CGGGTACGGATACTTCGCTT	V1A
YKL024C	URA6	1	D1.1	CATGGATCGCAATTCACGTA	GAAGGCATCCCAAGCACTGA	CATGGATCGCAATTCACGTA	GAAGGCATCCCAAGCACTGA	V1A
YDR480W	DIG2	1	D1.1	GAGGTGCATCTCACTCCATG	CCGTAGTATGAATGACATGC	GAGGTGCATCTCACTCCATG	CCGTAGTATGAATGACATGC	V1A
YDR127W	ARO1	1	D1.1	GAGGCTTGAACAGTATACGC	GCATCTAACACATGACGGAC	GAGGCTTGAACAGTATACGC	GCATCTAACACATGACGGAC	V1A
YIR026C	YVH1	1	D1.1	TTTCACGGGCGATATGCCTG	TACAGCCGGGCACTTGTGAT	TTTCACGGGCGATATGCCTG	TACAGCCGGGCACTTGTGAT	V1A
YDR171W	HSP42	1	D1.1	CATAGGTGTTAAGTTCCCTG	CACTATGGGTTTAATGGCTG	CATAGGTGTTAAGTTCCCTG	CACTATGGGTTTAATGGCTG	V1A
YOL064C	MET22	1	D1.1	ACGGCAGATTCATTACATCG	ATCTACGCAGGACGTTGTCG	ACGGCAGATTCATTACATCG	ATCTACGCAGGACGTTGTCG	V1A
YJR060W	CBF1	1	D1.1	TATCTGGCTACAGGGCTATG	ATTGACCTGAGACGCAGTCG	TATCTGGCTACAGGGCTATG	ATTGACCTGAGACGCAGTCG	V1A
YKL079W	SMY1	1	D1.1	TATAGTGCCAAATGCGCGAA	TCACTCGTCGCACTTATGAT	TATAGTGCCAAATGCGCGAA	TCACTCGTCGCACTTATGAT	V1A
YBL005W	PDR3	1	D1.1	AAGGAGCACTGGTTACACAT	AAAGGCATTGTCGCTAAGTT	AAGGAGCACTGGTTACACAT	AAAGGCATTGTCGCTAAGTT	V1A
YMR163C	INP2	1	D1.1	CCGGCATTTACATTAGTTCG	CAGCGTCGTCGAGTTTGTTT	CCGGCATTTACATTAGTTCG	CAGCGTCGTCGAGTTTGTTT	V1A
YDR044W	HEM13	1	D1.1	ACATGGTTGAAAGCGCGTCA	CATTATGGATGAGCTTCGGT	ACATGGTTGAAAGCGCGTCA	CATTATGGATGAGCTTCGGT	V1A
YJL155C	FBP26	1	D1.1	ACTATCCGCTGAGGGCTGTT	ACGCTTATAGTGTGGCAGTT	ACTATCCGCTGAGGGCTGTT	ACGCTTATAGTGTGGCAGTT	V1A
YGR206W	MVB12	1	D1.1	AGAGCCCGAGTCACGTAACT	CAGCTCGTGTCAGTCGTATT	AGAGCCCGAGTCACGTAACT	CAGCTCGTGTCAGTCGTATT	V1A
YNL162W-A	#REF!	1	D1.1	AGCTGCACTGGATTCATAGT	GATTGCTCGCCAGTCTCTTG	AGCTGCACTGGATTCATAGT	GATTGCTCGCCAGTCTCTTG	V1A
YPL144W	POC4	1	D1.1	AACCGCTACTGACTGTCTTT	TCAACCCGTGGGACTGAGTT	AACCGCTACTGACTGTCTTT	TCAACCCGTGGGACTGAGTT	V1A
YNL213C	RRG9	1	D1.1	CCAATGGTGTTGAAGGTACT	CAGCGTCGGTCATAGTTATT	CCAATGGTGTTGAAGGTACT	CAGCGTCGGTCATAGTTATT	V1A
YDR416W	SYF1	1	D1.1	CACAGCCTGCAATTCTTGTA	CCGACTCATAAAGATCGTGA	CACAGCCTGCAATTCTTGTA	CCGACTCATAAAGATCGTGA	V1A
YGL197W	MDS3	1	D1.1	TATCGAGGTGCAGATCCGCT	GATTAGGTCCTCCGCACGTT	TATCGAGGTGCAGATCCGCT	GATTAGGTCCTCCGCACGTT	V1A
YPL058C	PDR12	1	D1.1	CCCGCCCTAATGTTAAATGA	AGAGACTTCCCAATGACCTA	CCCGCCCTAATGTTAAATGA	AGAGACTTCCCAATGACCTA	V1A
YDR497C	ITR1	1	D1.1	TATTTCTTGGCACGCGGCCT	TTGGAGATCCGTCGCCACTT	TATTTCTTGGCACGCGGCCT	TTGGAGATCCGTCGCCACTT	V1A
YHR114W	BZZ1	1	D1.1	TATGTCGCAGCCACTTCAGG	CGAGGTTCTAACATGATTGC	TATGTCGCAGCCACTTCAGG	CGAGGTTCTAACATGATTGC	V1A
YDR347W	MRP1	1	D1.1	TCGTACTAGGTATCGGAGTT	AATTGCCCTGGACGGGTCTT	TCGTACTAGGTATCGGAGTT	AATTGCCCTGGACGGGTCTT	V1A
YLR450W	HMG2	1	D1.1	GCTCAACTCCAACGATATGA	CCTGCGCGTAAATAATCACA	GCTCAACTCCAACGATATGA	CCTGCGCGTAAATAATCACA	V1A
YPL134C	ODC1	1	D1.1	GAGAGCCATTCAATCACTAC	AGTGACACACCATTATGACC	GAGAGCCATTCAATCACTAC	AGTGACACACCATTATGACC	V1A
YDR068W	DOS2	3	D1.2	CCGAGCTACGGATATTTGAT	CGACGGCTGATACTCTTTGT	CCGAGCTACGGATATTTGAT	CGACGGCTGATACTCTTTGT	V1B
YDL052C	SLC1	3	D1.2	CTAGACCGTTAGATCCGTTT	CTGCCGAACAGACAACTGCA	CTAGACCGTTAGATCCGTTT	CTGCCGAACAGACAACTGCA	V1B
YDL104C	QRI7	3	D1.2	CCGATACCGCGATAGGATCT	CTGACGTAGTGAGCTTAGTT	CCGATACCGCGATAGGATCT	CTGACGTAGTGAGCTTAGTT	V1B
YLR077W	FMP25	3	D1.2	CCGACAGATCAAGGCAGTTA	AGTGGCAGTGCATCTAGCCT	CCGACAGATCAAGGCAGTTA	AGTGGCAGTGCATCTAGCCT	V1B
YDR021W	FAL1	3	D1.2	AATGTGCTACAAGAGCGTGA	ACATTTGGCACAAGTGGTCA	AATGTGCTACAAGAGCGTGA	ACATTTGGCACAAGTGGTCA	V1B
YGR036C	CAX4	3	D1.2	GATAATTCCCAACCATCGGA	GAGAGTAATTCACCTCAACC	GATAATTCCCAACCATCGGA	GAGAGTAATTCACCTCAACC	V1B
YMR171C	EAR1	3	D1.2	ATTTAGTCTCCACACGGGCG	ATTACTTGGCGACGTGGCCT	ATTTAGTCTCCACACGGGCG	ATTACTTGGCGACGTGGCCT	V1B
YBR030W	RKM3	3	D1.2	AGAGGGACCCAACTTTCCGA	ACTCCTTTCGGATGAGGGTT	AGAGGGACCCAACTTTCCGA	ACTCCTTTCGGATGAGGGTT	V1B
YPR124W	CTR1	3	D1.2	ACACTCGGGCGATAGGTATT	CCGCAAGGTAAACCATTTCA	ACACTCGGGCGATAGGTATT	CCGCAAGGTAAACCATTTCA	V1B
YER112W	LSM4	3	D1.2	ACATAGTCTACAGGATCACG	TTGCCGTGCATCCGATAGCT	ACATAGTCTACAGGATCACG	TTGCCGTGCATCCGATAGCT	V1B
YOL032W	OPI10	3	D1.2	TTGATACCGCGCTGACCATG	CCGCTCATGTAATTGAATGC	TTGATACCGCGCTGACCATG	CCGCTCATGTAATTGAATGC	V1B
YOR315W	SFG1	3	D1.2	CGCTGACAGTAACTTTCATC	TCATGTCGCATCAGCTATTG	CGCTGACAGTAACTTTCATC	TCATGTCGCATCAGCTATTG	V1B
YFR007W	YFH7	3	D1.2	AGACGTACAACCCATGTGGA	CGCCAAGAGCTCTGAAACTA	AGACGTACAACCCATGTGGA	CGCCAAGAGCTCTGAAACTA	V1B
YJL121C	RPE1	3	D1.2	GAGTCCTAACCATAATCAGC	GCTGCTTCATAACCTTACAG	GAGTCCTAACCATAATCAGC	GCTGCTTCATAACCTTACAG	V1B
YDR020C	DAS2	3	D1.2	GGCTCACTTTAATTGACCTC	AGCTTCATCACATTGTCGTC	GGCTCACTTTAATTGACCTC	AGCTTCATCACATTGTCGTC	V1B
YLR110C	CCW12	3	D1.2	TCCTAGTTAGCAGTTAGTGG	TTTCACCTGAGCCCGAGAGT	TCCTAGTTAGCAGTTAGTGG	TTTCACCTGAGCCCGAGAGT	V1B
YGR177C	ATF2	3	D1.2	ACTTGAGCTTCATGGGTGCT	GAGCTAACGCTAGATATGTC	ACTTGAGCTTCATGGGTGCT	GAGCTAACGCTAGATATGTC	V1B
YCR018C	SRD1	3	D1.2	AACGCAGACGTAGGTAACCG	AGATACGCATCCAGGTTCCG	AACGCAGACGTAGGTAACCG	AGATACGCATCCAGGTTCCG	V1B
YER005W	YND1	3	D1.2	CTTGCAGGTAAAGGCATAGA	ATACCGGACAGCAGCTACAG	CTTGCAGGTAAAGGCATAGA	ATACCGGACAGCAGCTACAG	V1B
YFR043C	IRC6	3	D1.2	TCCGACACGACAATGATGCA	TCATTGCGTGCAGAGTGTCT	TCCGACACGACAATGATGCA	TCATTGCGTGCAGAGTGTCT	V1B
YOR097C	#REF!	3	D1.2	GGCTTAACTATCACGATCAG	TATATGCCGACATTTGGGAG	GGCTTAACTATCACGATCAG	TATATGCCGACATTTGGGAG	V1B
YNL154C	YCK2	3	D1.2	TTACCCTTGGGAGCTGGTCT	AACCGTTGCGTAAGCTCGGA	TTACCCTTGGGAGCTGGTCT	AACCGTTGCGTAAGCTCGGA	V1B
YLR132C	USB1	3	D1.2	TGATGGGTCACACCTACCAG	TTCATTATGCCAGCGGTCGG	TGATGGGTCACACCTACCAG	TTCATTATGCCAGCGGTCGG	V1B
YKL089W	MIF2	3	D1.2	AGGGACCATAGACCATTATC	TGAGTACACCTACATCAGTC	AGGGACCATAGACCATTATC	TGAGTACACCTACATCAGTC	V1B
YAR009C	#N/A	3	D1.2	GCACCATAGAAGGCTGTGTC	GACCCAGCTACAGTATGTTC	GCACCATAGAAGGCTGTGTC	GACCCAGCTACAGTATGTTC	V1B
YBR205W	KTR3	3	D1.2	CAATACCTTGGAAGTCGGGC	CTGTACGTCGGAGACTTAGT	CAATACCTTGGAAGTCGGGC	CTGTACGTCGGAGACTTAGT	V1B
YPL034W	#REF!	3	D1.2	AAGAGAGTTCCCGAATACCC	AGGGTATCCTTGCCACCTTT	AAGAGAGTTCCCGAATACCC	AGGGTATCCTTGCCACCTTT	V1B
YDR379W	RGA2	3	D1.2	CGGGCTACTACATACTTATC	CTTACTTGTAGCATAGAGGG	CGGGCTACTACATACTTATC	CTTACTTGTAGCATAGAGGG	V1B
YJL146W	IDS2	3	D1.2	CGGTTAAGAGCCATTGATAG	GTATGACATCTTCTCCAACG	CGGTTAAGAGCCATTGATAG	GTATGACATCTTCTCCAACG	V1B
YOL110W	SHR5	3	D1.2	CCCGCGTGTCGATTAGGTTT	CGACCCTACAAAGAGGTGCA	CCCGCGTGTCGATTAGGTTT	CGACCCTACAAAGAGGTGCA	V1B
YDL022W	GPD1	3	D1.2	CGGATTCATCGCGTACTTCT	CTATGCTGCCGACTTGGGTT	CGGATTCATCGCGTACTTCT	CTATGCTGCCGACTTGGGTT	V1B
YIR037W	HYR1	3	D1.2	AATGGCTCGTCATCCGCTGT	CCGCTCAGCTAATATGATTC	AATGGCTCGTCATCCGCTGT	CCGCTCAGCTAATATGATTC	V1B
YDR103W	STE5	3	D1.2	GCCAAGAAAGAATGTTGCCC	GACCCTAGAGCATCTTAACG	GCCAAGAAAGAATGTTGCCC	GACCCTAGAGCATCTTAACG	V1B
YKL106W	AAT1	3	D1.2	CCTCTTGCATAATACGGTAG	AAGCACGACTTAGTAGCACG	CCTCTTGCATAATACGGTAG	AAGCACGACTTAGTAGCACG	V1B
YDR108W	TRS85	3	D1.2	AACACGCTTTAACTACTGCG	ACGTACCGAGTTATCATCCT	AACACGCTTTAACTACTGCG	ACGTACCGAGTTATCATCCT	V1B
YPL053C	KTR6	3	D1.2	ACGGTATGTAAATCTACGGA	ACTCTCTTGGGATACGGGTT	ACGGTATGTAAATCTACGGA	ACTCTCTTGGGATACGGGTT	V1B
YER113C	TMN3	3	D1.2	CTCTGTATGAGCATTTAGGG	GTACATACTAGACTACCTGG	CTCTGTATGAGCATTTAGGG	GTACATACTAGACTACCTGG	V1B
YOL025W	LAG2	3	D1.2	CATATTGCTTAGAGGGCCGT	GCTCCTTACAAAGCCTGAAA	CATATTGCTTAGAGGGCCGT	GCTCCTTACAAAGCCTGAAA	V1B
YHR027C	RPN1	3	D1.2	CCCGAGGTTACATTATTTGG	TTGCCAGCGCACAAATGACA	CCCGAGGTTACATTATTTGG	TTGCCAGCGCACAAATGACA	V1B
YNL221C	POP1	3	D1.2	GCACTGCACCAAGAGTCAGA	GCCCTACTGCAAGATTTGTA	GCACTGCACCAAGAGTCAGA	GCCCTACTGCAAGATTTGTA	V1B
YML123C	PHO84	3	D1.2	GGCCGGACTAAACATACGCA	GGGTCTATACACACACGAAC	GGCCGGACTAAACATACGCA	GGGTCTATACACACACGAAC	V1B
YKL138C	MRPL31	3	D1.2	TGACGCACCCAACGGAATGA	GCAAGACTTAGCAACTCCTA	TGACGCACCCAACGGAATGA	GCAAGACTTAGCAACTCCTA	V1B
YPL137C	GIP3	3	D1.2	AGCACTAGGCTTGAGCATTG	TCCTAGTGAGGCACATGATG	AGCACTAGGCTTGAGCATTG	TCCTAGTGAGGCACATGATG	V1B
YDL233W	MFG1	3	D1.2	GATGAGGACTAACTCCCTGC	GTAGCTGTAAGCACTGTTAG	GATGAGGACTAACTCCCTGC	GTAGCTGTAAGCACTGTTAG	V1B
YGR179C	OKP1	3	D1.2	TATATCCGTCCACGAGGGTG	TTGACTGCGAGACTTCCGGT	TATATCCGTCCACGAGGGTG	TTGACTGCGAGACTTCCGGT	V1B
YDL136W	RPL35B	3	D1.2	ATCAGAGCCACTGCCAGAAG	CAGGCTATTCAATCTGATCC	ATCAGAGCCACTGCCAGAAG	CAGGCTATTCAATCTGATCC	V1B
YER176W	ECM32	3	D1.2	CGAGACGAGTGCTCTACATG	GCACGACAGTTCATAACAGC	CGAGACGAGTGCTCTACATG	GCACGACAGTTCATAACAGC	V1B
YPR101W	SNT309	3	D1.2	ACAGACCCTAAAGCGTGTCA	ATGAAGCGATCCGAAGACCC	ACAGACCCTAAAGCGTGTCA	ATGAAGCGATCCGAAGACCC	V1B
YLR345W	#REF!	3	D1.2	AGAATGCGTCTCAAGCTGCC	TCACTACGTGCATCAGCGTG	AGAATGCGTCTCAAGCTGCC	TCACTACGTGCATCAGCGTG	V1B
YDR179C	CSN9	3	D1.2	CCGCCGATTGATGAAATAAG	AAGATCCACTCACGTTACAG	CCGCCGATTGATGAAATAAG	AAGATCCACTCACGTTACAG	V1B
YLR148W	PEP3	3	D1.2	AAATCATCGGGAGCATTGTG	TAGCACCTGAGACACTTGCG	AAATCATCGGGAGCATTGTG	TAGCACCTGAGACACTTGCG	V1B
YDL225W	SHS1	3	D1.2	TAGTCTACTGCACCTGCTAT	GCCATCGCGCTTGACAGTAT	TAGTCTACTGCACCTGCTAT	GCCATCGCGCTTGACAGTAT	V1B
YOR385W	#REF!	3	D1.2	GATTACATAACCTGCATCGC	TACATGAGGAAATGCCGCCA	NA	CACATGAGGAAATGCCGCCA	V1B
YAL032C	PRP45	3	D1.2	ACAGACTATAACGGTGATCC	GATAACGGAGGATAAGTCTC	ACAGACTATAACGGTGATCC	GATAACGGAGGATAAGTCTC	V1B
YOR357C	SNX3	3	D1.2	GAGAGACTATCAAGCCCGAC	GAGTGTGACCCACCATAATC	GAGAGACTATCAAGCCCGAC	GAGTGTGACCCACCATAATC	V1B
YCL045C	EMC1	3	D1.2	AGCCCGTCAAGAGTAACTTA	TGCCACGAAGCCATATTAAC	AGCCCGTCAAGAGTAACTTA	TGCCACGAAGCCATATTAAC	V1B
YJL209W	CBP1	3	D1.2	CGCTACATATACCTACAGAG	CTCCGTTGAATCCCATTGAG	CGCTACATATACCTACAGAG	CTCCGTTGAATCCCATTGAG	V1B
YDR109C	#REF!	3	D1.2	AGATCATGTCAACTAAGCCC	CATAACTGCCAAGGAGGTGA	AGATCATGTCAACTAAGCCC	CATAACTGCCAAGGAGGTGA	V1B
YBR053C	#REF!	3	D1.2	GCCTGTATGAAAGCACACCA	TCATATCAGTGCAGCAGCGG	GCCTGTATGAAAGCACACCA	TCATATCAGTGCAGCAGCGG	V1B
YBL037W	APL3	3	D1.2	ATTATACGTCCATCCAGCGG	TAGAGCCCTATCCATACGGG	ATTATACGTCCATCCAGCGG	TAGAGCCCTATCCATACGGG	V1B
YDL219W	DTD1	3	D1.2	CGAGCAGGGTACATTATTAG	CGACGAGCTCAATGCAGACG	CGAGCAGGGTACATTATTAG	CGACGAGCTCAATGCAGACG	V1B
YBL104C	SEA4	3	D1.2	TATAGTACACCGCCGTCACG	CCCGAACCAGGATCATTAAG	TATAGTACACCGCCGTCACG	CCCGAACCAGGATCATTAAG	V1B
YKR103W	NFT1	3	D1.2	AATGGCGTCGCACGTCCTAT	AATCGCGTGGCAGCCTTTCT	AATGGCGTCGCACGTCCTAT	AATCGCGTGGCAGCCTTTCT	V1B
YNL027W	CRZ1	3	D1.2	ATATCTAGGTGCAGGAGCAT	CATTAGGATACATCTGGCTC	NA	NA	V1B
YER099C	PRS2	3	D1.2	ATATCTAGGTGCAGGAGCAT	CATTGGATACATCTGGCTCA	NA	NA	V1B
YGL049C	TIF4632	3	D1.2	AATTAGGGTCAACGACGCCC	AAGGTGTACTGACGGTCTTT	AATTAGGGTCAACGACGCCC	AAGGTGTACTGACGGTCTTT	V1B
YER087C-A	#REF!	3	D1.2	CGTAGTATAGTCATCGTCCT	CTCGTGACGTTTGAGCAGTT	CGTAGTATAGTCATCGTCCT	CTCGTGACGTTTGAGCAGTT	V1B
YOL130W	ALR1	3	D1.2	AAGAGGGACGAACCTGTTAC	ACCTCCTTGCTAGGGTGGTT	AAGAGGGACGAACCTGTTAC	ACCTCCTTGCTAGGGTGGTT	V1B
YML097C	VPS9	3	D1.2	CGATTCGGACTAATGAGTTC	CACTATGGTTTAAGAGCTGG	NA	NA	V1B
YMR090W	#REF!	3	D1.2	GCACCTGGTTGAACGTATAG	TCACATGGAGTTGAAGAACG	GCACCTGGTTGAACGTATAG	TCACATGGAGTTGAAGAACG	V1B
YCL055W	KAR4	3	D1.2	CCGTTAGATTCAGTGTGACT	CCGAGCCTAGTATGCGACTT	CCGTTAGATTCAGTGTGACT	CCGAGCCTAGTATGCGACTT	V1B
YDR054C	CDC34	3	D1.2	GGTCCCGGCCCATAAAGAAC	GCCCAGAAGCCAGAATTGCA	GGTCCCGGCCCATAAAGAAC	GCCCAGAAGCCAGAATTGCA	V1B
YNL045W	LAP2	3	D1.2	ATTTGCCGAGCGATGCCCAT	GAGAGAGCTGCATAGACATC	ATTTGCCGAGCGATGCCCAT	GAGAGAGCTGCATAGACATC	V1B
YER003C	PMI40	3	D1.2	GACAGAGGTTCAACATTCCC	GAGCCAGGACGCTTAATACG	GACAGAGGTTCAACATTCCC	GAGCCAGGACGCTTAATACG	V1B
YBR097W	VPS15	3	D1.2	AATAAGCGTCACTCAGGGTG	CCGATGGCTTAATATGTGTG	AATAAGCGTCACTCAGGGTG	CCGATGGCTTAATATGTGTG	V1B
YDR411C	DFM1	3	D1.2	GCCCAGTTACAGGAAAGATC	ATACCAGGGCTAACAGGCTC	GCCCAGTTACAGGAAAGATC	ATACCAGGGCTAACAGGCTC	V1B
YGR071C	ENV11	3	D1.2	ATGGAAGACGCAGCTTACCC	ATTTGGAACCGCAGCTTGCC	ATGGAAGACGCAGCTTACCC	ATTTGGAACCGCAGCTTGCC	V1B
YPL213W	LEA1	3	D1.2	ATAGGATGGCCCACCTTTCG	AACTCCGGGTCATGTGGTCT	ATAGGATGGCCCACCTTTCG	AACTCCGGGTCATGTGGTCT	V1B
YDR038C	ENA5	3	D1.2	AGTGCTCTCAGTTCTCCAGT	AGTAGCGCCAGCCTAACATG	AGTGCTCTCAGTTCTCCAGT	AGTAGCGCCAGCCTAACATG	V1B
[truncated: 10,718 more rows]
