# Supplementary material for: Inhibition of transcription leads to rewiring of locus-specific chromatin proteomes
Source: Genome Res. 2020 Apr;30(4):635–46. doi: 10.1101/gr.256255.119 (PMC7197482; doi:10.1101/gr.256255.119)
Supplement: Supplemental Material [file supp_gr.256255.119_Supplemental_Table_S8.xlsx]

## Sheet: Readme
Epi-Decoder_Chrom-3xBC-HO_QC_190121_5279
Barcode Reference Table
Raw sequencing data has been submitted to the NCBI BioProject database (https://www.ncbi.nlm.nih.gov/bioproject/) under accession number PRJNA610036, and to the the NCBI BioSample database (https://www.ncbi.nlm.nih.gov/biosample/) under accession number SAMN14271072.

## Sheet: Barcodes_Chrom-3×BC
ORF	Name	BC_UP	BC_DN	lib
YGR163W	GTR2	ATGTAACACGCCCGGAATGC	TGAAGTAGACTCTCCCAATC	V1
YJL011C	RPC17	GACTAGGACCGATTGCACTT	GTGAGAGTTGCATTCTTCCT	V1
YLR052W	IES3	AGCACTATGCGAAGTAAGCC	CTGAGAGTTCGATGACCTGT	V1
YDR409W	SIZ1	TTGAGGAGCCCGTACTCTGC	TGGGATAGACCCTAACCACC	V1
YHR143W-A	RPC10	GGCCAACGTAAATCAGCTCA	CATGGATTGAAAGGTGCTCA	V1
YDR440W	DOT1	ACGCTCGTATCACTGGTTAT	ATCGTACTTGGCACTGGAGT	V1
YKL160W	ELF1	CACTATTCTCTAGGAGGGTG	TATAGCCACTCACTTGTGTG	V1
YIL063C	YRB2	ATGGAACCGTTAATCCTGCG	ATCCACTGACGAGAGAGTCG	V1
YNL068C	FKH2	GCGGCGGATATGCTATAAAT	GCTCGACTATGCCTTCAGGT	V1
YDR005C	MAF1	AGTTTATACCCACTCTGGTC	CCTAAGGTTTGCGAAAGTTC	V1
YJL184W	GON7	TAACTGGACCTAAGTGAGAG	AGACGACTAGCACGCCATAG	V1
YHR183W	GND1	CCCAGGAGTAAATCGCTAGA	CCGAATCGAGAACAGGCTTA	V1
YEL009C	GCN4	GAAGGCTGACGAAGTTTACC	TATAACGGAGCCGAAGGACT	V1
YNL059C	ARP5	GCTCGGCATAAATCTCAACA	TGTCCAGCAGCACCGGATAT	V1
YBR231C	SWC5	CATTCAGTGAGCCAGATAGG	TATGATAGCCACCGCGTCGC	V1
YDL197C	ASF2	GCTACACTGAGCATAGAGCG	ACTTAGGGAGTATCAGCATT	V1
YDR432W	NPL3	ATACTTGTACCAGGGCCAGG	AAAGTCGGGTGCATCCTTCT	V1
YLR262C-A	TMA7	CAGACAGGTTAATAAGTGCC	CAAACTGAGTGGACAGACTG	V1
YAL027W	SAW1	AGTAGCAACCCACGTTCATA	AGTACGCAAACAGATTCGCC	V1
YGL238W	CSE1	GGATGTTTCCTCAGCTCCGT	TAGCGTAACACAGTTGGGAC	V1
YER162C	RAD4	AGATCGTCAGGTCCACCGTT	CGCACCTATATTAAACCGGA	V1
YKL139W	CTK1	ATAGTGACGGAACTGTTAGC	AGGACATCTATAACTCCGTC	V1
YER063W	THO1	TATGACTTCCCATTCGGTCG	TAGTAGGTCGCAGGTCTCCT	V1
YJL047C	RTT101	GCCTGACAGACAATCTATCA	CACGCGGATCTATGATTAGT	V1
YJL081C	ARP4	TTATGACGACCAGCGATGGC	TATGATCTCTGCCAACTTGC	V1
YGL207W	SPT16	TACCGGATTACAGCTCGTGG	TCCTTTGAGGTAGAGCTAGT	V1
YPR086W	SUA7	AATCCGCGTCCAAGTGGCTA	AATCCTGGTCAACTTGTGCC	V1
YIL128W	MET18	CGCATGACGCAATATGGATA	TGAGTCCTACGCACGCTATG	V1
YMR037C	MSN2	ATAATCAGCGGGAATCAGGC	AAGCCGATGGCATGTCAGAT	V1
YNL201C	PSY2	ATATCTCGTAACGCGGCAGC	ACTACAGTGCGCGTAATGCG	V1
YOR060C	SLD7	TACATCACCGTATGTGGCAG	TTAGCACCTGTCACATCGGG	V1
YLR109W	AHP1	GTGACCACTACAGTTTATGC	GGTTGAACAGCCCTCGAATC	V1
YJL065C	DLS1	TACTGCGAGATACGTGTCTG	TAGCACTTCACATACGAGTC	V1
YNL082W	PMS1	GAGTATCTTATCCACCTCTA	GGATGATCTTACCTCACTCT	V1
YPL268W	PLC1	ACTCTGAGCGGATACCGGAT	AGGGAGGTCTCTCACCATCT	V1
YAL015C	NTG1	CACGTAATACTAAGTGAGGC	CACAGTAGGTAAGCTGTACG	V1
YGL252C	RTG2	ACACCTGAGTAGGCGCGATT	CCGGCTGCTAAATACTAACA	V1
YGL009C	LEU1	CGCGTACACTTACTATCAAG	CAGGTCAGTACACTTATTGG	V1
YBR272C	HSM3	CCAGCTACTAAAGGATGTCA	AAGCCTTCAGTGCGTCATGT	V1
YGL044C	RNA15	CATGATCGAGAATGACTCAC	TATGTTGCCGCATCTCCGAT	V1
YNL139C	THO2	ATGGCATGACGACCTTCGCT	TCACTTCCATCAGGGTGTGG	V1
YJR093C	FIP1	CACGTCACCGTATGTAGAGT	CACCAGCCGTGACTGTGTTT	V1
YMR120C	ADE17	TATCATCTGGGACAGCGTTG	CTCTAGTATGCAGGATGTTG	V1
YOR274W	MOD5	GGGCACACCCAATTTAGACA	GCGCGTCAAGTACAAAGTTA	V1
YPL008W	CHL1	CATCTCCGGTAAGGGATTAG	CACGTTTCATGGTAGAGGTT	V1
YIR033W	MGA2	TAAACACAGTGCTCAAGCGC	CGCGACATCATAGCAACTTA	V1
YDR301W	CFT1	CTCATCAGCTCATAGGAGGG	ACATCGACTAGAGCTTATGG	V1
YBR278W	DPB3	TAGACTTATGTCACACGCGG	TAACATCATCGCATGGCGGG	V1
YGL070C	RPB9	GTAATACACTTCAAGGACCC	TAAGGGTTACGAACATCGCC	V1
YGL253W	HXK2	GCGCCTCTGCAAGAAGAACA	TAGAGCGTCGCATCGGATAT	V1
YIL033C	BCY1	GCTCGCTAGATTGAGAGAAT	ATACACCGGCATAATCTGTC	V1
YMR311C	GLC8	ATCGAGCACGTAACCGTTGC	AATCAGCCGTAACGTGAGAG	V1
YCR033W	SNT1	AGAGTGCCGCAACCTCAGTA	GCGGCACTTAAACACTATCA	V1
YDR485C	VPS72	GAGACTAAGTTCGGAAATCC	GACCCTTATCCAGTCTTGTG	V1
YMR227C	TAF7	TATGATCCTCTCGACAGGCG	AATACTCCTAATGCTGGCGA	V1
YGL112C	TAF6	TCAGCTTTCACAAGGGCCGA	TAATCACGTCGAACCTGAGC	V1
YGR104C	SRB5	GGACCCGATACACGATGTTC	GGAGCTACGGGCACTCTTAT	V1
YLR180W	SAM1	AACGAGTTGTGACACTTGGT	CCGTCTCGGAAACTAGATAA	V1
YLR335W	NUP2	AGATGACACAACCCGGTGCA	AATGTGAGCGAAGTCCACCC	V1
YER111C	SWI4	AGACCGTACACATTTATGGC	AGACACCCTATGAATCTTGC	V1
YPR120C	CLB5	GCACCCATCTTCATAAGTAG	TATCAGCATCGACGGACACG	V1
YGL131C	SNT2	GATCGTTACCCACTTGCATG	GCCTATTGCATATACGACCT	V1
YOR304W	ISW2	TTCGACAGCGGGATACATCG	TACAAACCAAGAGTGTGTCG	V1
YLR358C	#REF!	GATAGATTCCCAGCTTTCGC	GCGACGATAGTAGTACATAG	V1
YDR318W	MCM21	TTAGTCACGCCACTGGCTCG	TGGAGTGTATCACCCGTCCT	V1
YPR132W	RPS23B	ATAGATACCGCAGCTCACAG	GCGTCAACTAAATTCCAGCA	V1
YGL060W	YBP2	AATTCGCACGCAGGTTGACG	AATTGTATAGCAGTCGTCGG	V1
YDR226W	ADK1	CGAGCTTACCAACTACTTGA	CAATCGCAGGTCAGATGATG	V1
YML102W	CAC2	GCATCTCAGAAATCGGCACA	CGAGTGACTAGATACGCTAT	V1
YDR071C	PAA1	GCAAGTGCTGGCAATCTAGC	AGTATAAACCTACCTAAGGC	V1
YDR363W	ESC2	TTAGCGGCGAGACCTCCTAT	TTGTGTACCCGACCCGCTGT	V1
YKL035W	UGP1	TGATCGCTAACAGCTCAGGC	GCTCCTAGAGTATGAGAGAT	V1
YPR018W	RLF2	AACAGACTTTGTAACAGGCG	ATGATTGACCCGCAGACTCC	V1
YCR066W	RAD18	CGATCCACAGTAGCTGAATC	GGAGATGACACAATCGCCCA	V1
YDR303C	RSC3	CGCCCAATGCAATTTGTAGA	GGCACGTTGTCTAACTACGG	V1
YMR044W	IOC4	GCGCAAATAAAGATGTCGTG	GATGCGCCCTCAGTTTGTCT	V1
YER159C	BUR6	AATCGGACCTGATATGGCGC	ATAGCCGTCGGATCTGTGTT	V1
YOR038C	HIR2	GAGATCATGCTATTCAAGCC	AGGCGATGATGGCATTTACT	V1
YDR448W	ADA2	TTATCCGGTAGCCATAGGCG	TTAGGTCTCAGCACTACTCG	V1
YDR308C	SRB7	CCATATTTGCGAAGGTCGGC	CATGACAGTGCTTAGAACCG	V1
YIL101C	XBP1	AGCAGACTCGAATGTTGCGC	CAAGCCGCTGTCAGATGTGT	V1
YCL011C	GBP2	TTATAGCGAGCACACTGCGC	ATCTGAGGCATAGCCAGTCG	V1
YJL115W	ASF1	TCAAGCGAATCCCATGTGAC	CCGGACATAGCATATTAACC	V1
YBR202W	MCM7	GCACGCTGACTATACTTCAA	GATATAACACATCGCGTCCA	V1
YGR254W	ENO1	GAGATGTGGATCTCACCCAT	GAGCGAGGTCTATATCTTGT	V1
YHR061C	GIC1	AGTATCTCACTACGGCTCAT	TACCTGTTCAGCAGTTGTGG	V1
YJL164C	TPK1	CCTGTAGATTGACGTGTAGT	GCCCTCGTGACAAATCGAAA	V1
YJR032W	CPR7	CCTGCGAAGGAATTGGAATA	CAGATACGGGAACACTGTAC	V1
YJL130C	URA2	AGCCATGATTTCACATTCGG	CTTATTCATAGAGGCTTGGG	V1
YDR092W	UBC13	GCCCAAGTACAATTTCGACA	GCCCAGTGTCAATTTCGTTA	V1
YOL068C	HST1	CCATAGGTTTAACGCTTGCG	CATGACGGGTGACGTTCTTT	V1
YFR028C	CDC14	ATGAGCATCCTGGTAACCCG	AACCTTACGGCAGAGTAGCA	V1
YDR361C	BCP1	TACCAGTACATTGCCTGAAG	GTTCAACCCATCGGATATAG	V1
YDR138W	HPR1	AATCTGCATGAAGGTTGAGC	CCCGTGCATCAATAGTAGTA	V1
YMR033W	ARP9	GACCACCGATAAGGCTAATC	GAACCGACTTGACTACATTG	V1
YBL052C	SAS3	CGCCTAAGACCGGATAAAGA	CACTTATTAGGAGGCAGATG	V1
YJR006W	POL31	TGCCTAAGACCGGATAAAGA	CACTTATTAGGAGGCAGATG	V1
YLR015W	BRE2	GGGATCTTCACAACTTCTCA	TTGCCATGCACAACGAGACA	V1
YJL127C	SPT10	TGGGACTCAACCAACATCGA	TATGGAACTCACCGCGTAGC	V1
YDR146C	SWI5	GCGCGTATAGTGCCTTAATT	TACGCAAATCAAGGCTAGCC	V1
YKL210W	UBA1	GGCTTATAGAGACATACACC	GCAAGAAATACAGCGGGCTC	V1
YOR033C	EXO1	ATTATACCGCCGGAATGGGC	GCCGAATACGTGCTAATTGC	V1
YAR002W	NUP60	TGTGGAACCAAAGCGCCCAA	TGATCCGGTCTAATCCGACG	V1
YER038C	KRE29	GGTATGACTATCACCCATCG	GAAATCCACTGTCACATTCG	V1
YIL021W	RPB3	ACACGACCAGGGATGGAATC	AGATCACTGTAACCGCCGAG	V1
YCR084C	TUP1	GCTACCAGACCATTTGAGGC	GACGCGCTCGTAACTCATAG	V1
YML065W	ORC1	CAGATCAGAGAAGGTGCCAC	ATATGCGGCCCATGCCTATG	V1
YOR213C	SAS5	CCAGTCACAAGATAGTGCCA	TATGACGCCATCAGCACGAA	V1
YPR065W	ROX1	CTTGAATCGCAAGGAAGCTA	CAGAAGTGAGAATTGCGCTA	V1
YMR127C	SAS2	AGCATGTGGCATAACCTTTC	CCGTTAGGCAAACATGAGCA	V1
YIL122W	POG1	GGCTCACTAACAAGGGCACA	CATACAGTCCTCAGGGCTAT	V1
YLR027C	AAT2	GCGCACGATAGATATTTAGC	CTATACCTAATAAGGGAGGC	V1
YKR048C	NAP1	AATCCTTGGTAAGAGTCGCG	ATTATTTCGCGGGCACGCCT	V1
YLR285W	NNT1	CCTTGAGCATAATCGAGATC	GAGATCGTTCCACTGCTGCT	V1
YKL108W	SLD2	AACTTGCGGACAATGCCGGA	AGAGGCATTCAACTTATCCC	V1
YGL048C	RPT6	ATAGATTCGGCCACCGGCAT	AATGATACCTCAGTACCGCT	V1
YOR001W	RRP6	CGGATATGTACTAATTGGGC	CGCATTCAGTACATTTACCG	V1
YNL072W	RNH201	GCGGCACCATAATTCTACAC	CTCTTTAACTGCCATTACGG	V1
YKR002W	PAP1	CATCACAGAGGCGGAAAGCC	CAGTCTCATTCACGGATACT	V1
YDR520C	URC2	AGCTGACCTCTATATGCCTT	CCTCATTTACACGATTTGGA	V1
YFL013C	IES1	CGGACATGATAATTTGGGAC	ATTTATGGCGACCCGCACTG	V1
YDR227W	SIR4	TCACCTACAGATGGGCGAAG	CGTATCGACAAGATGCACAG	V1
YER041W	YEN1	AACCATTAAGCAGACGTGGC	AACACTTTCCGAAGAGTTGA	V1
YKR029C	SET3	GCGCATAGTATATCAGTCTG	CATCGAGATTACCGCGTCTG	V1
YML073C	RPL6A	GTGCGAACCAACGTACTACA	GCAGGAACACCACAGGGTTA	V1
YCR086W	CSM1	AAGACATCAGGATCATGCGG	TCAGAAACCAGCAGTTCGGG	V1
YOR048C	RAT1	GGACCCTTAATAATCATGCC	CCGTAATCATAAGGACTTCC	V1
YPL178W	CBC2	GCCATCGGTGTCATGTACTT	TCCCAGGATAGCAAGGAGTA	V1
YGL094C	PAN2	CAGGTACACGCATTCGCTAG	ATGGACGATCTGGTAACACG	V1
YDR052C	DBF4	TGCAAGACGAAAGTCGCCCA	TAATCGCTACGAATGCTACC	V1
YHR167W	THP2	GGGCTATAAGTCTCTCGAAC	GTTCGACGAGGCGCTATACT	V1
YLR453C	RIF2	GTATTCCGACTGCGGCACTT	TAACGATGTCGAAGACCGGC	V1
YHR120W	MSH1	GAATGGATCTCAAGAGGTAC	GACGATCCTGAATCTAACTC	V1
YDL220C	CDC13	TTCGCTTAAACAATCGGCAA	TCTCGGTACAGAGTTTGACG	V1
YML098W	TAF13	TTATTGGCAGACGCCCATCG	GACGCACTATTTACCATTCG	V1
YJR046W	TAH11	AGTGTTACCACATCGGCAGC	CGGACGACTATAATAATCGC	V1
YNL107W	YAF9	TACCTTAGTCCACTGGGCTG	TATGTTTCTGACCGCTGCGT	V1
YER091C	MET6	AATGCTAACGCACCAGAGGC	GGGCAGCATAAACACTTCCA	V1
YBR135W	CKS1	AATTCGCTCTAAGCTGGGCG	AGTAGGATAGCCTCCCACTG	V1
YGR074W	SMD1	GGCATGACTAAAGCCACTCA	AGAGTGCTCCTCATCTACGT	V1
YPR068C	HOS1	ATGTTCGGAAGAGCTGTCTC	TATCTGGTACGAGTGCTGCT	V1
YNL330C	RPD3	AGCCTAGAGGTCTGTGAAAT	AATGAGTGGTCACCTGCCCT	V1
YNL317W	PFS2	TACTCACGCTGTGCTAATCC	GATACCTCTCGATATGCGCG	V1
YLR321C	SFH1	GCGCTCATAATAAACTCGCA	AGAGGCTCCTCATCCTATCT	V1
YML061C	PIF1	GCAAACGGGTTGTAATTCTG	AGCCACGTCTTACATTTCTG	V1
YDL131W	LYS21	AAGCACATTGTCCTCAAGTC	TGAGACGTTCTGTAACCCGG	V1
YKR008W	RSC4	GGCAGGCAGTTCATTCAAAT	GCCGAGTCTGTATCATTCGT	V1
YBR198C	TAF5	TAGACGATGCGCCATGTCAG	AATAGCAGATACGGCCTGAG	V1
YBL008W	HIR1	GGGCTACCTCTCAATTATAC	AGTAATGACCATCTCGACCA	V1
YOL058W	ARG1	CCTATACTGGAACTGACGCA	ACGACTAGATCATGGTAGTG	V1
YBR253W	SRB6	GTGCAGGCCAAATGCCACAA	AGCGTACTCTGAATGCCGTC	V1
YLR277C	YSH1	TAGACACGGTACGAATGCCC	AACGGAATTGAGTCAATCCA	V1
YBR279W	PAF1	CGAGTAAGTAGAGCTGATTC	CCTAGACGGAGATATGTTTC	V1
YPR025C	CCL1	TATAGGTCCCGATACGCCGT	ACCCTTTGAGGAGCGGTAAT	V1
YPR107C	YTH1	GATAGCTTACCATCTACGCG	TGATTCGTAAGACTGGATCG	V1
YER030W	CHZ1	TTGCCTGCATCCAGTTAGGG	CAGACGGCGTTAATACCTGG	V1
YPR175W	DPB2	CTCTCAGGAGGAAGAATGTA	CCTGGCATACAATACAGTCA	V1
YNR010W	CSE2	AGATATTGCCAACCGGCCTA	AATTCGGCTCAACATGGGCC	V1
YGL037C	PNC1	ACTCATATTGCATGGCGCTG	ATAGATCCAGCAGATGTGAG	V1
YKL216W	URA1	GCGGTCGATACATTTCTAAG	GAGCGACTCCGATTCGTACT	V1
YJR017C	ESS1	GATGAATGCGAACCCAGCAC	ATCTACGCGGACGCATAGTG	V1
YBR087W	RFC5	GAACGCACTGCAAGTATGTA	TGCAGGGCAACAAACGTCAA	V1
YGL122C	NAB2	TTACCACTGCCGAGGTGTGT	ACTAACTTTCAAGGATGGCC	V1
YOR189W	IES4	AACTGCTTCGGAGTAGTGTT	CCGGTGTGTAAAATTCTCTA	V1
YOR229W	WTM2	TTATCGAGCACAGTGTCGGC	TAAGCGATTAGAGCTATGCT	V1
YDR028C	REG1	ACATAACTTTCCAGAAGCGC	AACTCTCGTGAATCGTTGTC	V1
YGL058W	RAD6	AATATGCGGAAACCGGGTCA	ATAGTTGGACCACCGTACTC	V1
YDR182W	CDC1	ATATGCTCGGAACGTGTCGC	TATGCCAGGTGCCATTCGTT	V1
YEL044W	IES6	TCCAGAGAGAGCTTCATAAG	GGTTATTACCTCCCACTATG	V1
YOL148C	SPT20	ATTGATACAGGCCGATATGG	GCGTCAGCCACAATCATTAA	V1
YOR052C	#REF!	ATAGCGACCCAACCGGATGA	ATTGTAATACCAGTTCAGCC	V1
YGL066W	SGF73	CATATAACGCACGATCTAGC	GCTAACCATCAAGCATCGTA	V1
YDR451C	YHP1	TTACTTCGGCCAGTCGAGTG	TATAGGCTCGGCAGTTCGTA	V1
YNR052C	POP2	GCACTCACTACAGATAGATC	ACTGCCTAGCAAGCATGATA	V1
YER169W	RPH1	CCACATTGTTCAAGGACGGC	CCGACATTACTTAACAGTGC	V1
YLR058C	SHM2	GGACACTATACAGCATTCTC	CGAGTGCTTAGATGCTAGTT	V1
YER171W	RAD3	TTCTACATACCGGCATACAG	TATTCTATGCCACGGCTCGG	V1
YNL220W	ADE12	CTATTCAGGGCAACGGTGTA	TTAGGCACCACAGTACGAAC	V1
YNL218W	MGS1	ACGACCGTCTAACTATGCAG	AACCACTGCGGACATAGGAG	V1
YPR182W	SMX3	ACCAGTATGTGGAAGCTCAG	CGTAACGTATGCTAAGTGAG	V1
YDR034C	LYS14	CCCGTGAGGCTAGAGATTAT	CTATTGGATGTCACGGGATT	V1
YIR034C	LYS1	AGCATTGTCTCAGTCCGTGT	GAGCATGATACAGGATCTTC	V1
YKL059C	MPE1	CCATTATTGGAAGGTTAGGC	CCTTTCGTAGATAGGAGAGT	V1
YPL082C	MOT1	CTTCAGCAGGTATTTAAGGG	TCAGGCCAGCTCATTCATGG	V1
YAL054C	ACS1	ATTAGCAGCGCCATTACGCG	CCGCTTGATACATTTGATCG	V1
YFR037C	RSC8	AGACACCTATTTGTAACGGG	ATATACGGGCCATTCCCTGG	V1
YDR216W	ADR1	AATCGCTGCTAAGAGCCGAG	CCGGCTTATGAATAGATAGC	V1
YJL074C	SMC3	GCCGTGAACTTAACTCGATC	GCGGCATACGTTCGTCAAAT	V1
YNL136W	EAF7	GCCAGGGCTATTAACTTTAG	TAAACCTCTTTGAACGGACG	V1
YOL145C	CTR9	TGATCCCACACATATAGAGC	AAACCCGCAGGATGCAGATG	V1
YOL021C	DIS3	GTATGCTCATCATCCCGTAT	CTATCGAGGATCACGGACTG	V1
YHR031C	RRM3	GGCTACTCGTCATATTACCT	TCCCGCGAAGTAAACATTCA	V1
YDR079C-A	TFB5	ACATTCAGATGGACTGCATG	GCAGTTACCGCATAGCTGTG	V1
YAL011W	SWC3	AAGGATCTTTCAACAGCTCC	AATTAAGGAGCATGGACCTC	V1
YLL026W	HSP104	TTATCACTGGCGAGAGAGCT	GGCATACGAGAATAGCCCAC	V1
YLR376C	PSY3	AGCCCGGTCTCATCGTTGTT	CACGTTCGCCAAGTACGGTA	V1
YLR154C	RNH203	GATTTGCGAACAGCGATCCC	GGAATCATGTGTAACAGGTC	V1
YNR012W	URK1	AACACTGGTAAACGGTGCGA	AAGAGTGACGTAACCTCCTC	V1
YDR404C	RPB7	GCTACACCAACATAGGTTCA	ATATCTGCATCAGGCTGCGG	V1
YDR155C	CPR1	AAGCAGTGGGAAGTCTTATC	AATCGACGCTAACGACTGAG	V1
YPL204W	HRR25	GACGATATGATAACCTCTGC	ACTACAGAGACACTTCTAGC	V1
YBR095C	RXT2	CGAACTGAAGGCATATTTCC	TACGGTAACACAGGGTACGC	V1
YLR395C	COX8	CTAGATGACATGCTCTCAAG	AGATATGAACCATCGTCCAC	V1
YLR086W	SMC4	GAGTTATCAGCACCTCCAGC	GCAGCTCTCTCAGTGTTTAT	V1
YMR106C	YKU80	AATGAGCTGGAAGCCTCTGC	CCATGTGGAGAAGATCGTAC	V1
YAL061W	BDH2	AGCCACCAGCTAATTGGAGC	AAGATTAACGCACACTTCGC	V1
YFR050C	PRE4	TACCGATTTACAGGTGCGTG	TTACCGAGTGTATGACAGGT	V1
YKR082W	NUP133	AATATGATGCACGCGCTGCC	GCCTGCACCAAATCTTGAAA	V1
YER116C	SLX8	GATCCTAGTCCATAGCCTGA	GATCTAGTAGCCTATCGACT	V1
YDR075W	PPH3	CCACTGCTACAAGTCTATGA	TGATGCACTAAATGACCTCA	V1
YKL112W	ABF1	ATTTAGCGACGAGGATACCG	AAGTATCCCTCACCGTTGAT	V1
YDL101C	DUN1	CTATACGCAGGCATGAGACG	CCGCAGATGAAATGTGAGCA	V1
YDL139C	SCM3	AACATACGAGGCGGTGCAAT	ATGAGACGGCTAGTACGCCT	V1
YOR191W	ULS1	AGAGATCACTGACACCGCAG	GAAGGCATCGTAACTCCGAT	V1
YNL088W	TOP2	CATGGTATTACAGGTAGCTG	TCTGGACGCCGATCACTCTG	V1
YKL114C	APN1	ACGAGCTAGTTCTCAGTCTC	CCGGCACGTAAAGGAGATCA	V1
YML010W	SPT5	ATAACCACCGGGAAGTGTGA	CCGTGAGATTCAGCTTTATG	V1
YOL090W	MSH2	GCGGGCTATACATCATTATC	AGTACAGTCACCATTCAGTC	V1
YDL070W	BDF2	GGTGACTCAACATTGGGTTA	GGGTACATATCAATCTGCAC	V1
YPR187W	RPO26	AATCTCGAAGACGCCGGAAG	ATGGCGCACACCTTAGACAG	V1
YEL071W	DLD3	ACCATAGTGATGAAGTTGGC	AAGTACAGAGCCACATTTGC	V1
YDR228C	PCF11	TGCGATATAATAAGTGAGCC	ACAACGCTATCAAGTATCCA	V1
YLR035C	MLH2	TATTCGACCATGCCCAGAAG	CTACTCGTGTGAAGGTTAAG	V1
YFL014W	HSP12	CCAGCCTGTAAAGGTGTCGA	CCAACCCGGGTTAATGGATG	V1
YDR532C	KRE28	TAGTACGTCCGGCAGTTCCT	ACCATAGTTTAACGAGGCGA	V1
YGR099W	TEL2	AATAGCTGGTTAAGCCGTCG	ACTTTCTACGGAGGCGTGCT	V1
YKL110C	KTI12	CGCCAGACGTTAGTAATAAG	ATGTACCAGCCAGACACCAG	V1
YOR258W	HNT3	CTATATGAGTACGGCCTCGG	TAGTCTCATCCATCGCTGGA	V1
YMR039C	SUB1	GATAGCTCTAAACTTCCCGA	GGTACATAACCAGTCTCTAC	V1
YNL206C	RTT106	GCTAACCCGTAATTGCTATC	GACCGTAGACTGTTCTGAAT	V1
YAL021C	CCR4	AACCTACGGGCATGTTCGTG	AATAGACCTTCATCGGGCGT	V1
YNL025C	SSN8	TCAGACGGTGTCCATACTGT	AGCAGAATTAACGGCCTGTA	V1
YMR176W	ECM5	GCCGTAGTAACAAGCTCACA	GCACTCGTAGTCATGTGTAT	V1
YNL250W	RAD50	GAGAGTATGCGTTCCACCCT	TGCCCGAAGAGTAAAGTTCA	V1
YDR207C	UME6	GCACTCATTCTCAGTAATCG	TCGCAGTACGTTAAGTGTCG	V1
YOR209C	NPT1	AATCATGGCTCAGTAGGGAT	GCGATGCTCTCATTAGCCTA	V1
YOL005C	RPB11	GAAGTGGTCGTCATACTCTC	TTACTAAGTGGCGAGAAGTC	V1
YOR375C	GDH1	ATACTCACTGAAGGTCCGGC	AACATCCAGGTGCGGAACGA	V1
YDL156W	CMR1	AACTACTGTAAAGCGGCGGA	ACTAGGGACTAACTTCGCTC	V1
YPL122C	TFB2	CCGCTCTACTATAAGAAAGC	GGATAATCTACTTCAACCGC	V1
YOR341W	RPA190	TTATAGAGGCTCCCACTCGG	TACGGACTTCCAGTTATGCT	V1
YMR167W	MLH1	CAATCCAGGCTATATCGCTG	ATAGGCACGGAATCTTGCGC	V1
YMR005W	TAF4	ACTTGACCGAGTACGTCGTG	GCAGGGATTATCATACTGTG	V1
YMR061W	RNA14	ATATTCATCTAAGGCCGCCG	AAGGTTAGCTCATCGGGACT	V1
YGL163C	RAD54	ATTGTGAGGCACCGCCGAAT	AATTAGTTCTCATGCCGCCT	V1
YNL124W	NAF1	GGGCGATCCAAACATATCCA	CAGAGTCGTTTAACTGACGG	V1
YJR068W	RFC2	GCCCGGACACAGAATTATTA	GTCCCACGCTAAGAATTAGC	V1
YOR346W	REV1	TGACCCAGACCAGTTTGTGC	TTATGCGACCGAGCACTTCG	V1
YIL131C	FKH1	AGCTAAGCCCGACGTTTCAG	CATTCAGTTACAGAGGTGAG	V1
YEL032W	MCM3	CCAGTCTTCAAACGTGTTCA	CAGACGTTTACAAGCTCGTA	V1
YLR005W	SSL1	GCCCTATGATCTAATTGTGC	CTGACGCACGGATCTTTATG	V1
YLR095C	IOC2	GCGACACCGAGAGCTTATTC	CTTGTCAGAGATAGGCAAAG	V1
YPL254W	HFI1	CGCTTACTTACATACCGTAG	CCCTTGATGGGACTGTAGTT	V1
YPR168W	NUT2	TTTCTAACAGGCGTTGGAAG	ATTCAGGACCCACTGGACAG	V1
YKL028W	TFA1	ATATCTCACATGCCCGGAAG	GCAGATATAGCATTCTCCGG	V1
YHR085W	IPI1	GGGTTACACACCTATATGCC	GCGACTCCATTAACTATACG	V1
YOL104C	NDJ1	CGTAACATAGGCTCAAGGAC	GCACCAGTAGTCAACTTTCA	V1
YCR042C	TAF2	TTATCTGGCGTACCGCTCGG	ATTCCTGGGACACTTCTGGG	V1
YPR070W	MED1	TATGTACTCGCAGCAGCTCG	ATTGGAGTGCCACCATCTGC	V1
YDR156W	RPA14	GACCCGATTCCATTTACTTG	CTCGGCTAGGATAGAGAAAT	V1
YGR124W	ASN2	GCACGGACATCATCATAATC	GCCATTGAGAAACATTCCCA	V1
YDR217C	RAD9	GGCGTATCCCAGATGTCCTC	TCCGGCAACCAATGGGAAGA	V1
YDL160C	DHH1	CGGAAGTCTGGTGAATCTAG	GGATACGATCTACGCACACG	V1
YKR017C	HEL1	TAGGCTATCCTCCACGTATT	ACAGATGTAATAACCCGTCC	V1
YDL182W	LYS20	GTACTGGACTCCTAGCTCTT	TAGTACGGGATAAGGCAGTC	V1
YMR273C	ZDS1	AGCCGGTGATCGAGTTCTTT	CCCGGAACGTCAATGAGAAC	V1
YDL047W	SIT4	TTGTACGACGCAGTCTTCCC	TATGTCGGACGCCGTAGACT	V1
YML074C	FPR3	ATACTCTGCGAAGCGGTAGC	GAGCATACACCAGTCTTAGC	V1
YER120W	SCS2	AAGCTCCTGTAACTCTAGCG	ACATACTTTGCAGGTAGTGG	V1
YML121W	GTR1	TTACGCTTCACACTCGTGGG	TTGGCGGGCCCAGCTATTCT	V1
YLR216C	CPR6	GCTCCAGAGACATATTGAGA	AATTCAGCGGCACACAGGTC	V1
YHR154W	RTT107	TGGCAGCTAATCAACACCTA	TCAGTCGAGCCGATGGATCT	V1
YJR035W	RAD26	ATTTAGCCGTAATGCCGCCG	ATACGTTAGGCACCTGGACT	V1
YOR014W	RTS1	TGCATGGCCTTACAGGTCTG	GCCCATCCGCAATATGTATA	V1
YBR115C	LYS2	ATGATACTAGCATCGAGGCG	ACTAGAGCTGCCTTAATGCG	V1
YOR151C	RPB2	TATCACGTCGCATGTAGTGG	GACGATTCTACAGTCCTTGA	V1
YBR195C	MSI1	GGCAGCAGAGTTAATTCATC	AGGTCAGACAGCATTCGCTC	V1
YLR135W	SLX4	CATGGATCAACAGCCGCTTA	TGTCCACACAGGTAGAACAC	V1
YMR239C	RNT1	CCTAGAGACGTAGATATGCG	GTACCCGGTTTGAAAAGTCG	V1
YLR418C	CDC73	CCCATACATTGTTAGAAGGC	CATAGAGGTTAAGCGATACG	V1
YFL029C	CAK1	CCACACTTCTATAAGGGCAG	CACCCAGACCGATTAAGGAG	V1
YPL240C	HSP82	ATACCTTCGGCAGGATGCTG	TACAGCCATGAATCTATCGC	V1
YKR062W	TFA2	GCTCAACAGAACTGCATTCA	ATATCTTGACGAGCTGCCGG	V1
YPR179C	HDA3	GATGATATGGCATTCCAGTG	ATGGACCTCTACCGCGTATG	V1
YBR175W	SWD3	CTCCTAATGTACGCTAAGAG	AACACTCGTTGGAATGTGAG	V1
YDR098C	GRX3	AGATGTAGAGCATATACCGG	CAGACATCACGATATGGCGC	V1
YJL006C	CTK2	GATCGTACTCACCATGTATC	AGAGACGACCTAAGCCAGTC	V1
YER092W	IES5	GAGTAATCACCAGTGTGCCC	GGCCTCTACGAATATAATCC	V1
YAL038W	CDC19	CATAGGTGTAAATTCGCGGA	CGTAATAACGAATCGCTCAC	V1
YNL273W	TOF1	ATCGTTTGAAGACTTGGTCG	ACCTTTGGAGGATGGTATCT	V1
YIL084C	SDS3	ATGTCGCACACCCGATGAAG	CATAGGGTCGTACATTCCGG	V1
YPR133C	SPN1	GGCTCTAACCAACCGGAAGA	GAGGGCCTATTCCTTCCATT	V1
YOL006C	TOP1	AATAGGCGCTAAGCTGATAG	AATCAGTATGAAGCGAGCGC	V1
YDL091C	UBX3	CGCTATCATGTCATCGAATG	GAGATCCAGGTCGCTACATG	V1
YKL005C	BYE1	CACTGCGTGTTAAGGATATG	CTAGCTGATACATTGGCAGA	V1
YDR510W	SMT3	CATTAGCCAACATGCTGTGA	TCACTCGGTGCATGAGGACT	V1
YGR042W	#REF!	GATAAGCCCTAAGGCAGGTC	GGAGTTCGACCTACTGCCAT	V1
YCR020W-B	HTL1	GCGCCACAGCACTTAATATA	TCATCTGCGACACGGATTGG	V1
YER148W	SPT15	CCTCTACAGCAAGTGGAATA	CTCATGTAGTGACAGTGCTG	V1
YDR502C	SAM2	AAGGGCATCCAAGTTGTTGA	GATTATTGTCAAGCCTCGCC	V1
YMR117C	SPC24	TATGAGCCGGTACGTGTATT	AGGTACTTTCAACTGCGTCC	V1
YDR026C	NSI1	GACTATGGCGTGTCACCGTT	TAAGGACTGATAAGCCGGTC	V1
YIL061C	SNP1	GCGCTGCCATAATCCAAATA	TATACTGATGCAGACGGCTG	V1
YBL035C	POL12	ACAGCTCTTAAACGGTGGGA	AATTGAGGCTAACGCCCGTC	V1
YBR081C	SPT7	ATACCACGCCAAGAGGGTGA	AACACGACGCGAATGTAGCC	V1
YIL112W	HOS4	ATCTTCACGGGCCAGTAGTG	ATAGGCACTTCACCAGCGTG	V1
YGL202W	ARO8	ATATGCGGCTACATCCCTGG	CAAGAGACGCTAATTGCGGC	V1
YOR243C	PUS7	ACAGTATGGACAGTTCCGCG	AAAGGCCAGTGGATTCATGA	V1
YPR161C	SGV1	TTTACTCGGGCCAGGTGCAT	TATACCGTCCGAGGTGATGT	V1
YNL007C	SIS1	CCACGATACCAATTCATAGA	CTAGATAGACGACGCTACAG	V1
YPL022W	RAD1	TATAGTCCAGTCCAGGCACG	TACTTAGGCGCATCAGTTGG	V1
YNL118C	DCP2	GGGTACTTCACCATTCCTAG	CACACGGCATGGGATTAACG	V1
YPL235W	RVB2	TATATGTGGACCAGTATGCG	GAGTTACGCACCTACAGTCG	V1
YPL126W	NAN1	ACAGACTCCCTAAGATGCAG	TATCCCAGCCCATGAGGAGA	V1
YPL139C	UME1	CGAGATAAGGTGCGATCACT	ACGCAGTGAGTAGCATCCTG	V1
YHR197W	RIX1	GATGTCACCTAACTCATGTC	TCAGATGTGACAAGAGTCGA	V1
YDL126C	CDC48	CCCTGAAGTCTTGCCAATTA	ATATTGTGCAGCGCCCACTG	V1
YMR236W	TAF9	GAGACTACTGAACCTTCGGC	GACGGTACTCCATTTGTATG	V1
YBR160W	CDC28	TTCTTACACACCCAGGAGAG	TAGATAGCCAGCCACCATAG	V1
YER089C	PTC2	GGCTAACCTTCAATGACTAT	TAGAGTTCCACACAGTGACC	V1
YMR182C	RGM1	CGACCTGCTAGATTATTCCT	CACCTAGAGTTCTTGCAGTT	V1
YNL085W	MKT1	ACGCCGACATTGCATTCAAG	CGGCGGTAACGATTATTAAG	V1
YOL094C	RFC4	GTACAATAACCACTGAGGCC	AAGGTACAGCGACCATGTCC	V1
YLR134W	PDC5	CAACTAGCCGCAAGGGAGTA	CGCACCTAGATAAGATTTCC	V1
YBR049C	REB1	TAGTACGCAGCATCTGGACG	TGAGCAGGTACATCTTCCGG	V1
YKL214C	YRA2	GGGATCACTAAACTACCTCA	GCGCTGAAGAGAACGGTAAC	V1
YER142C	MAG1	TCCTCGACGCGATGGCATAT	GAGGTCATCAGACGTATATG	V1
YCL040W	GLK1	CAGAGCTGTGCAATGATCCC	GCGCCATCACAAGATTTACA	V1
YFR013W	IOC3	AAGCCAGCAGCATTCCTAAG	GCCTACCGTATAATATCCAG	V1
YPL194W	DDC1	GTCGCATCGTGCTCAACTTG	TGAGATCCGCTACATGCTCG	V1
YDR289C	RTT103	CCAGTGATCCAATTCTGTGA	GAGCATGAGGTACTATGACT	V1
YBR089C-A	NHP6B	GAACAACCAAGACGTGTGTC	GACTCCGTACTCACTAGGAT	V1
YKL074C	MUD2	AAGTATCTCGCACCGGCATG	TTCACGGAGCGCAGATCATG	V1
YDL116W	NUP84	TGGACGAGGACAACCACTCA	TAATTCCAGCGAAGTCTGCC	V1
YOR279C	RFM1	CAATAGTGGGCAAGCAGTTA	GAGCACCTGGCATTGTCCAT	V1
YFL017W-A	SMX2	CAGATCATGGAATATCACGC	CACATTTAGCAACCGCTGTA	V1
YDR469W	SDC1	GTACTCCGGTTCAGCATGTT	TAGGAGCTACCAGGACCTTC	V1
YDL076C	RXT3	ATTACCCACGGGAGACATCG	AGCCAAAGAAGACTGTGTCG	V1
YPL181W	CTI6	GAGTGCTATCCACGAGACTG	ACATCGCCAGCAGGATTGAG	V1
YER022W	SRB4	TTGTACCCACTAGACGTGCG	TTGAGTGTCCGACATACCCT	V1
YDL164C	CDC9	ACAGCTCTGCTAAGATGGAG	CCTCTACTCTAAGCTATGAG	V1
YOL135C	MED7	TCCTTGTCGGCGATGCGATT	ACATAGTGAGAACTTGGGAC	V1
YMR053C	STB2	GATACTGTCACACCGTTGCG	GAGCGCCCTATACTATCTAT	V1
YGL090W	LIF1	GCCAGATGTCAACACAGCTA	TCAGGCGCAGAACTGTAGAC	V1
YOR179C	SYC1	AGACTGACGCAAGGCACCTA	GAGTCCCTGGCATCTGATCT	V1
YEL019C	MMS21	TATTGGGAGCCAGGTTTCGT	TCGCGGACTCTACGGTATGT	V1
YPL138C	SPP1	CGTTGATAGCAAGCGAGATA	AGCGAGCAGCCATTTATCCG	V1
YJR082C	EAF6	GCGTGACAGTTTGTTCAATT	GAGGCGACTTCATTGATACT	V1
YDR419W	RAD30	CATAGATGGAAATCGGCGCA	CGATCACTTCGACTCATGTG	V1
YPR019W	MCM4	GCTCGTATTCAAGATCATCA	GTAGTTACTGCCACCCTATG	V1
YDL105W	NSE4	ACTTCTGCCACGGGTGACAT	AGATTTACGTCATCCCAGCT	V1
YJR140C	HIR3	TACGAAACTAAATCGGCTGC	TGAGAGGACTCCACGACATC	V1
YDR191W	HST4	CAGATCAGGGAACTTAACGC	CCAGCGAGTTAACGAGTTAG	V1
YHR118C	ORC6	ATCGTAGTGTCACGGCTTGT	CGCCGTGTGAAACATACTAA	V1
YOR298C-A	MBF1	CCACTCAGATCATATCCTAG	GATGATACTGAACACCAGCC	V1
YDR363W-A	SEM1	GCATCCTGCACAATGAAGCA	TAATGGACATGACGCGACAG	V1
YLR113W	HOG1	TGGAATACCCACGAACGGAC	CCATAAGACGTTGTGAAGCC	V1
YPL184C	MRN1	GACTGTCTCTCATGCCTGGT	CATCTGACACTGGTGCTAAT	V1
YPL061W	ALD6	CTATACCAAACATACGGGTC	TAAGGACGGCTAACCTCTTC	V1
YHR090C	YNG2	AGCTCACAGTACAGAGACTC	ATAGCTCGCCAATGGGCCTA	V1
YDL084W	SUB2	CTAGTGTAATCAGGCTGTCG	CGCGTATCATCATTACTTCG	V1
YHR077C	NMD2	CATATAGGATAATGGGCCAG	CCAGCTAGGCAATCATACTA	V1
YKL113C	RAD27	CTATCACGGGTCAGGAGTCT	CGATCTTGGGTCACAGCGTT	V1
YOL004W	SIN3	TATGGAACGACATCCGAGCC	AGCACACGTAGGAACTATCC	V1
YCL061C	MRC1	CGGGAAGATTTATGCAATGC	GGCCGCATTAGTTAGAAATC	V1
YPL128C	TBF1	GGTGTACCTCCAACTTACTA	GAACGTCGCGGACTTGATTT	V1
YDR176W	NGG1	TGAGCCGCTTGCACTAGAGT	GCAGTTCGCATCATACCTTG	V1
YGL173C	XRN1	TTCGACGCGAGACTCTAGTG	GATTTCCACTCATATCCGTG	V1
YJL090C	DPB11	AAATTCCGCTGCGTCAGGGT	CTCGGACGAACAACGGTGAA	V1
YDL201W	TRM8	CCGATTTGCACAATGTCTCA	ATGCAGTCGTCACGTCTCGT	V1
YAR003W	SWD1	AGGGCTCGTCGATTCGTCTT	CCATAAGGTAAATCGGTCGA	V1
YCL016C	DCC1	ATGAGGCGTCGAACTCTTCC	AACTGCGTGGAATTTCGCTC	V1
YLR117C	CLF1	TGTTAGTGCCGCGCTACCTC	AGGAAGTACGTCTCCCAAGA	V1
YPL129W	TAF14	CCGGTTGCCAAAGCGAGAAA	CGAGGAGAAGAAGTTCCCAC	V1
YBL093C	ROX3	CCTTTGAAGCAAGCAGAGGA	TGCACTAGCCAAGACACGGA	V1
YEL061C	CIN8	ATTGATGACCGACCGACACG	ACTTTCCTAGCAGTGAGCGG	V1
YDR295C	HDA2	CAAGCAGGAGTGACATCGCG	TAATGAGGTCGAATGTCTGC	V1
YAL019W	FUN30	TTTCACGCTGCCAGTGTCTG	AAGGCTGATGAATGCTGATC	V1
YPL015C	HST2	AACGGACGAGCAGTACCTAG	ATATTCCCAGCGGGCTAACG	V1
YBR057C	MUM2	TGCAGTAAGCTCAATCACAC	AGTAGGCACTCTCCTCAATG	V1
YMR275C	BUL1	CAGTTATAGCCATTGAGCCG	CATCACGTTAAAGCACGCGA	V1
YKL032C	IXR1	TTATAGCACCCATGACGGGC	CCTATTATGGGAATGTGTGC	V1
YNL112W	DBP2	AGTGGGATCTCCTCAAGCTC	GGCCTCCACGAGAAGCAATA	V1
YGR056W	RSC1	AACCCTTTGTAAGCGGTGCG	TCACGTAGCGCGATGTCTGT	V1
YGR163W	GTR2	TATAGACGGACACAGTCGCC	GAAGATAGATCACGCCGTCC	V2
YJL011C	RPC17	TAGTTTATCCGCCCGGTGCT	TCGATTCGGAGATCCTGGTT	V2
YLR052W	IES3	GAATACGAGGTCACAGTACG	AATTGTCCAGCATTGTGCCG	V2
YDR409W	SIZ1	ATCGGATTTGCACTGGCCGT	TGATGTGTCATACCCGCCTT	V2
YHR143W-A	RPC10	ATGTACGGAACCTCGATGCC	CAGGGATGAACAGTCCTTCC	V2
YDR440W	DOT1	CAGGGATGGTCATATTTGCT	CTCTCCGGGATTGCGATGTT	V2
YKL160W	ELF1	TTATGAGACCGCTGCAACCG	CCTCGTTAATGATATGTCCG	V2
YIL063C	YRB2	ACTCTCATTGGGTGTAAGGT	AGGGCTCTACTAGCTTCCTT	V2
YNL068C	FKH2	CTACTAGAGAGAGATACGCG	CCTCATATCGCATTAGATCG	V2
YDR005C	MAF1	TGTTTCACGCGGGTCCATCT	GATTCCTAGCTCGCGCTGTT	V2
YJL184W	GON7	ATATGGAGTCCCGCCAGCAT	AACATGCGATAAGGCGGCTC	V2
YHR183W	GND1	ACCTGCTTGGCATCTTGGGT	GAGCGACTGCGACTTAGCTT	V2
YEL009C	GCN4	GAGCACTCAGTACCAGTCAG	GATACATCTCCAGCTTACGC	V2
YNL059C	ARP5	ACAGCTCACCGAGTATAGTG	ACTATGATGGCAGACCCGTA	V2
YBR231C	SWC5	GGTAGGACTTCACTTCATCT	ACAACTCCTTCGATGGTGTT	V2
YDL197C	ASF2	CTGGAGACACGATAGACAGT	GCGCCATATAAATTCTCGCA	V2
YDR432W	NPL3	ATGCTGACGCAGATCCGATG	AGACCTTGCACATGCTTGCG	V2
YLR262C-A	TMA7	TTAGGGATACGCAGCCATCG	TTAAGATACCTGCCCATTCG	V2
YAL027W	SAW1	TTATGTACCATCATGCCCAG	TCGCGCATAAGACCAATCGA	V2
YGL238W	CSE1	GAGTCTCGTGCATCTGCTCT	AGCAGAGCGCACCGTATGAT	V2
YER162C	RAD4	GGCACCGTAGTCACTTCTAT	ACACCGTCTTCAGTGCTATT	V2
YKL139W	CTK1	CACCTGCGGTCGATGTTGTT	GTGTGTACCGTCCCTCAGTT	V2
YER063W	THO1	ATGAGCCCGTGACTGCGATT	GCCGAAGTTATCGCAATGTA	V2
YJL047C	RTT101	TTATGGTGCAGCGTGCCACT	CTACTGTTGAGAGCGGTATT	V2
YJL081C	ARP4	GCGGCGTTAAGACAAATTAC	GACGGCGTTCGACTCTTGTT	V2
YGL207W	SPT16	ATGTTTCCGCGACGCCGTTT	CAGGTACTGCGATTTGAGTT	V2
YPR086W	SUA7	GCATGGTGCATAATGTGTTC	GCGCACCATAATTTCTAACA	V2
YIL128W	MET18	ATTGTAGACGCGCCGAACCT	GAGGCGTTACGAGCTTTATT	V2
YMR037C	MSN2	GGAGGATACTAACCTACACC	TTACGACCAGAACGGGACAC	V2
YNL201C	PSY2	CAGACAGAGACAGGTGTACC	TGCCATAGAAGCCAAGGTGA	V2
YOR060C	SLD7	ATACAAACACGATTCGCGCT	AGTGTATCCCTCTCGACGTT	V2
YLR109W	AHP1	AACTCAGCGGAATGGATAGC	AACATGCTCCAATGCGCGTA	V2
YJL065C	DLS1	GACAGGAGGCGAATATGCCC	CACACAGTATAAGACTTGCC	V2
YNL082W	PMS1	TGAGTTACCCTACCTATCGT	AGGTTCCCTACACGCTTACT	V2
YPL268W	PLC1	GGTTAATTTACCCGAATCCC	GGAACGAGTAGCAGACATCC	V2
YAL015C	NTG1	GACAGGTAGGACATTACTCC	AGAGATACGGCACCATCGTC	V2
YGL252C	RTG2	ATGCTTGTGCAACGTGCGCC	CAAGACGCTGTTGCATTTGT	V2
YGL009C	LEU1	AGACATAGCCGAATGGAGCC	ATGAAGGTTCCGTCAACTCC	V2
YBR272C	HSM3	AATTTCGCCGCATGGTGCTG	ACATCGGTGGAATCGTGCTC	V2
YGL044C	RNA15	TTATCTTCCCGAGCGGTGCC	AACATGACTTGAGGCTGGTT	V2
YNL139C	THO2	ATGGTTACCCGATTCTCCGT	CTGAGTAGTATATGGGCCTT	V2
YJR093C	FIP1	GAGTCTTCACCAGTTGACCG	ATACATGGATCAGCAGAGCG	V2
YMR120C	ADE17	ACCGACTGGTCACGTTTGCT	GTGACCCGGCTACCTATGTT	V2
YOR274W	MOD5	ACTATCCTGGAGCTAGAGGT	CGGCTAGTGAGACTTTCCTT	V2
YPL008W	CHL1	TTTATCCCAGGCAGTACGCG	TACCGTGACACAGGTGATCG	V2
YIR033W	MGA2	GTAGAGGAGCCCTTCCATCT	TTACGCCTTCGACGGCTGTT	V2
YDR301W	CFT1	ATCCATGCTCCAGGTTGGTG	TCATCGTGCGTAATGTCGCG	V2
YBR278W	DPB3	TACGGACTTGTCAGTATGGT	GGTACTGATCCTTCACGCTT	V2
YGL070C	RPB9	ACATAGTGACCATCTCTCAG	CCGAGTGACACAGATAGAGC	V2
YGL253W	HXK2	GACGAGGGTGCATTTCACCT	AAGCTCCCTTGCCATGTGTT	V2
YIL033C	BCY1	CCACCATGATGAATTGTCAT	GCTCTCTCGAAATACACGAA	V2
YMR311C	GLC8	GCGACAATCAACTCGATGCA	TGACGCTTCGGCATCTGTCT	V2
YCR033W	SNT1	GATGCTAACCGACGATCTGC	GCATCATACGAATCCAGTAC	V2
YDR485C	VPS72	GAGACCACATCTAATTCAGC	CCCATGATCTCAATTAGGAC	V2
YMR227C	TAF7	CGACTAGGGACAGTTCTTAG	AGATCACCATCATAGCGACG	V2
YGL112C	TAF6	TCTCGAATGAGTGGCAAAGC	AGCTCAGGACGATTGTAGAT	V2
YGR104C	SRB5	CGACGACTGCTCACGATTAT	TATGAGTCTGCACGACCCTG	V2
YLR180W	SAM1	ACCTATTCCCGATTGGCGTT	CTGAGGGATCGACTGTTCTT	V2
YLR335W	NUP2	ATATCGCACGTCACTCATGG	CCCGAGTATCTGAGCTGATT	V2
YER111C	SWI4	CCACGCGGTAGATATAGTAT	AAGCCCGTTGTCCATCTATT	V2
YPR120C	CLB5	CCTTCTTAGAGATGGTTAGG	GCCCGTGGACAAACTTCAAA	V2
YGL131C	SNT2	ATCATGCGCCAAGCCGTGTA	TTATGCACCGTGACGAGGCC	V2
YOR304W	ISW2	AGTGACGCCTTCGCACATTT	GGATGGCCCTCTTCTCAGTT	V2
YLR358C	#REF!	TTAGTAGTCCCGACGGCACT	CACGGTCGTTAGATGGTATT	V2
YDR318W	MCM21	ACTCGCGTATGAGGTCGTTT	TAGTACCTCGTCCCATAGTT	V2
YPR132W	RPS23B	CAAGAGGATTGCATAGACCT	AGCCGGGACTGATCTTTATT	V2
YGL060W	YBP2	ATATTGCTCGAAGTGCCCGC	TTTATCCCACCGGCAGAATT	V2
YDR226W	ADK1	CATCATTGGTGCATGGCGCT	CTCTTAGTGAGTAGGACGTT	V2
YML102W	CAC2	GGACATCATACCAAGCCTGA	CGTGCCTACACATAAAGCTA	V2
YDR071C	PAA1	AGACCGCTACAACTGCTTGA	GCGCTAGTAAGCAATGAGTA	V2
YDR363W	ESC2	AGAGACGTTTGGCAACTCCC	GAGGAGACTACATACCATCC	V2
YKL035W	UGP1	GCCCAAATAAGACGTGAGCC	GAGGAATAGCTCCGAACTCC	V2
YPR018W	RLF2	CTACATGCAGTACAGTGGAG	CCATCTAGTTGAATCCTGAG	V2
YCR066W	RAD18	GGATTATCTACCACCTGACG	CCAAGAAATCTAAGTGCCCG	V2
YDR303C	RSC3	TACGATTGCAGAGATTGCTG	ACATGGACGACATTGTGCTC	V2
YMR044W	IOC4	AGTAATAACGGATCGGTGCT	AGGCTCCTTCGACTCTGGTT	V2
YER159C	BUR6	GACACTCTCGAACTGTAGGC	GCACGACTACGAGAGTATAG	V2
YOR038C	HIR2	TTTCTAGTACGGGCCAGCGT	AAAGCCTTGGTCATTGCCTT	V2
YDR448W	ADA2	CCTTAGAGTCGCCGGAATCT	AACGGAGCGTGATCTATGTT	V2
YDR308C	SRB7	CTCAGGATAGTCATGGAGAT	GAACTGAATGCACTCGAGGC	V2
YIL101C	XBP1	TATATTTCCCGGAGGTGAGT	GTATGATCCGTGCAGCCCTT	V2
YCL011C	GBP2	ATGCAAACAGCAGGTACGCG	GTTCCCATTCCATGTGATCG	V2
YJL115W	ASF1	CGATGTCAGATAAGGTATGC	CATATCTAGGAAGTGAGAGC	V2
YBR202W	MCM7	TGATCCTCGACATGGACTCG	ACATCATGCACAGTGGCTGC	V2
YGR254W	ENO1	CGTGGTACGATTTACGATCT	ATTGACGCCCGGACTGTGTT	V2
YHR061C	GIC1	GGAACATCTGCACAATCGCA	CCTCGCGCTAGATAGATGTG	V2
YJL164C	TPK1	CATGAGGGCAAAGTCCTGAA	TATTGGCGCTGCACCTGTCT	V2
YJR032W	CPR7	GCTCACACTAAAGGGCATCA	CTATGCTTCATCAGTCGAGT	V2
YJL130C	URA2	ACGGATCGGACATTGTTTAG	TCATATCATCCAGGCCGACG	V2
YDR092W	UBC13	ATATACGTGGAATGACTGGC	TATGTCACCGTCATCGTGCT	V2
YOL068C	HST1	ATGCTACGGCCACTAGGTTG	ACCTGAGTTAGAGGATGACT	V2
YFR028C	CDC14	GGGTCGACATAACTGACACC	GCAGACTGTTAATTCTCCTC	V2
YDR361C	BCP1	ATAACCGTCCTTCAGTCGTT	ACGCGGCTATGAGCTTTCTT	V2
YDR138W	HPR1	TACCTCAGTCGCAGAGATGG	CTGGACTGGATACTGTGATT	V2
YMR033W	ARP9	TCAGGTGAGTCATTGGCTCT	TATACGCCTGCCCATGTGTG	V2
YBL052C	SAS3	CTATCTTCGGGCAGTGGTAT	AGCTGTCAGGTCACTCTATT	V2
YJR006W	POL31	CATGCTCAGACAGTATGTGC	ATATGAGCACCAGAGAGCCC	V2
YLR015W	BRE2	AGCGACGGCTTGTCAGATTT	CCCAGCCTATTTGGTCAGTT	V2
YJL127C	SPT10	CAGACTAGAGAATCGCCGAC	GGCACTAACGCAATGTGCTA	V2
YDR146C	SWI5	CATACATGATGAGCTGAGGT	TATGATTGGCAGCCCGCACT	V2
YKL210W	UBA1	CACATCTCTGTCACGGGTTT	TGGCAACCTCTCCGATAGTT	V2
YOR033C	EXO1	GCGCTGCAATCAGAAAGGTA	GAGTCTCACCGACACTGATG	V2
YAR002W	NUP60	CTATCTACTGGCAGGAGCTG	GGACTTCCACGACGTATCTG	V2
YER038C	KRE29	GTACTGAATGGATATGCGCT	ATCTTCTGAGGTCGGACGTT	V2
YIL021W	RPB3	GCTAAGAGGATATAACGGTC	TCCTTCATGCGGGTACAGGT	V2
YCR084C	TUP1	ACGACAGTGTTGTAAAGCCC	TTACCAGGGACACAGTTGTC	V2
YML065W	ORC1	CATGGATGACGAGTCTGCAT	TGACTAGCGACATGCTGCTC	V2
YOR213C	SAS5	TTCTATCTCCGACGGTGGGT	AGGATTACGTTCACCCTTCT	V2
YPR065W	ROX1	CGTAGATGTCAATACTAGCC	GAGAGGACCTTGAACACTCC	V2
YMR127C	SAS2	AGACGATAGTTGCATGTGCT	CATACGGGCCTAGTCTGGTT	V2
YIL122W	POG1	TATAGGTTTCCATCCCGCGT	GATAGCTCCTTCAGATCCTT	V2
YLR027C	AAT2	ATGTTATCCGCCACTGCTGG	TATGCCTCACCCAGGATTGG	V2
YKR048C	NAP1	CAACGCACTGTAATCTACCG	TACTATACCGGAGCTGAGCG	V2
YLR285W	NNT1	CAATGCACCGTAATCTACCG	TACTATACCGGAGCTGAGCG	V2
YKL108W	SLD2	TCCCGTAGGGTGGATAATCT	CCGAGCGTTTAGAGTATGTT	V2
YGL048C	RPT6	AGAATCTCTAGCAAGCCCTA	CGTGAGTACCAAGATTAGGA	V2
YOR001W	RRP6	TACCGCTTACGAGGTTAGGT	ACTTGAGCGGTTGACAGCTT	V2
YNL072W	RNH201	ATAGGGCCTTGCACGCATCT	AACGTCCGATTAGCTCTGTT	V2
YKR002W	PAP1	AATCGCTTCTCAGCCGTGGT	AAGTTCACCTGATACCGCTT	V2
YDR520C	URC2	GATAGTCACCCAGACGTTGC	GCATCGACTTAATGGTCACG	V2
YFL013C	IES1	ATGATCCACCTCACTTGATG	TCAGACTTGAGCACAGCGAG	V2
YDR227W	SIR4	GCCGTGTGAACAATCCAGAA	ACTGCTATCAGAGCCGCATG	V2
YER041W	YEN1	GTGCGCGACACAACGCTGAA	AGCTACCGAGTCGATCTGAT	V2
YKR029C	SET3	GCATACATGAGACTTCGACC	AGACTGCGCCAACGTATCTA	V2
YML073C	RPL6A	CTTGACAGGAGTGATAAACC	CAGTTTAACGCATCGGGACG	V2
YCR086W	CSM1	CTATTAGAGGGCAGAATTTG	AACCGGCAGTGAGTCAGAAT	V2
YOR048C	RAT1	AGGAACCCAGTTTGACGAAG	GCCTCACCATTGATTAACAG	V2
YPL178W	CBC2	CACTGACGCTCACTGATTAT	ATAGTGATTGCACCGCCCTG	V2
YGL094C	PAN2	AAGCCATTCGTTCACAGGTT	ACGCTACGGTGTCCGAAGTT	V2
YDR052C	DBF4	TGAGGCCGTCCACTCTGTAT	CTAGGCGTAGGGATTCTATT	V2
YHR167W	THP2	CCATATCGTGAACGCTGTGC	ATGATCTGGCAATAGCGCCC	V2
YLR453C	RIF2	CAGCATGTATCAAGTACGAC	CCGCTAGAGCAAGTAATGGA	V2
YHR120W	MSH1	CACGTATCGTCATAGAGACT	GACCCGGATGCTTCATTATT	V2
YDL220C	CDC13	GAACTACCTCCAAGGGTCTA	GAACCCTCCGTATATGCTTT	V2
YML098W	TAF13	GCCCGCATGAAATGAGGACA	ATTGCTTCCAGCGTGGCACT	V2
YJR046W	TAH11	ACGGGATGCTGACTATGTTT	GAGGCGTTATTCCAGTAGTT	V2
YNL107W	YAF9	TCTCTAAGAAGACATCGGGA	GCGCGGTCAGAACTAATATA	V2
YER091C	MET6	TAGTAGACTGGAGCTTACCT	ACGCGGATGTTGTAGAACTT	V2
YBR135W	CKS1	GCATTAGTAACATGGTGTGC	ACGTCAGGTCAATCATGCCC	V2
YGR074W	SMD1	ATTAGGGCTTCCACTGCGCT	TACTATCGTAGGTGGACGTT	V2
YPR068C	HOS1	AAGCGTTGACAAGCTAGTGA	GGCCAGGAACTAACGATCTA	V2
YNL330C	RPD3	CGGCCACTAAGATATGTTGA	TTAGACAGGCAAGGCTAGTA	V2
YNL317W	PFS2	TTACCCTGCGGACTAGGTGT	AGGTTACTCCGATAGCCCGT	V2
YLR321C	SFH1	TAGAGGCAGACATAGGTCCC	AAGTGAATAGCATCCCATCC	V2
YML061C	PIF1	GGCTAATACTTCTGAACCCC	GTATTTATCACACGCTCGTC	V2
YDL131W	LYS21	AAGCTACCTGAATGAGCATC	TCTCTCAACGAAGACCATAA	V2
YKR008W	RSC4	GAGTAATCAGCATGGATGTC	GGGATTTAACCTCCACGTTC	V2
YBR198C	TAF5	CAGCGGTTGCTCACTGTTGT	CGAGAGATCGTATTACATGG	V2
YBL008W	HIR1	CATGAATCACGAGGAAGGCC	TAACTGCACAGACGTGGTCC	V2
YOL058W	ARG1	TCGGACGTTATAGATGTGCT	CCCTCTCTAGGTACGTGGTT	V2
YBR253W	SRB6	AAGGCTGATCCATACGGCGT	GGATAGTTCCGTCACTCCTT	V2
YLR277C	YSH1	GCGCGAGGAAGACATACCTA	GCCACTGACCAATAGCAGGA	V2
YBR279W	PAF1	GATCTATCGCTCGTCACGGT	TGGGTATCTCTCTGCAGCTT	V2
YPR025C	CCL1	AACCAGAGTTTCTAACCGCG	AACGACTACGGCACATATCG	V2
YPR107C	YTH1	TTGGAGTCACGTCCGCATCT	GAGCGGGTACTACTTCTGTT	V2
YER030W	CHZ1	CAGCAGTGCAAAGGTCTGAA	ATGACGGCTGCACTGTGTCT	V2
YPR175W	DPB2	CACCTGTTTCGAGGATTGGT	TACGGTCGGTCATTCCGCTT	V2
YNR010W	CSE2	GCTGAATGACCATGAAGAGC	CAGGAATGATAATTGCGGAC	V2
YGL037C	PNC1	GGTACTACTCTAGCCGATCT	CAAGCGTTAGTAGCTGTGTT	V2
YKL216W	URA1	CCTTTGATAGGATGTGCGAT	CATGACTACGCATTAGCGCG	V2
YJR017C	ESS1	TCGACGTGCATCCAGGAATG	GAATTGACGCCAAGCCACTA	V2
YBR087W	RFC5	TATGGCGTCTCAGCGTCTCT	TATGTCTCGCCAGCGTTGTG	V2
YGL122C	NAB2	CCGAGTAGCCAAGAGCATGA	TCGCTGAGGAAAGCACCACA	V2
YOR189W	IES4	CCTAGAGTCAGAGAGATTAG	GGGTATAACGGATATTCACG	V2
YOR229W	WTM2	ATAGCTGTCACACTTGCTCG	GCATCGTTTCAAGCGTCTGC	V2
YDR028C	REG1	AGTATTGCTCCAGACGCCTG	ATCTACGCGATCAGTGGCTG	V2
YGL058W	RAD6	GAATAGCAGTCAACGGCACC	GATAGATTACCAGACCTCTC	V2
YDR182W	CDC1	CGTAACATCCCATTTGGTAG	CGCAGTCTCCGATTTACGTT	V2
YEL044W	IES6	CGGCCCGTATTTGACATTAT	TAGGCGACCTGACTTCTACT	V2
YOL148C	SPT20	CCTTACGGTTAATGAGATGG	GCCCGGAGCCCAAATGTAAA	V2
YOR052C	#REF!	ATTCTGAGCGGTGCCATAGT	ATTCTGCGACGAGGCTCTTG	V2
YGL066W	SGF73	CCCGTCGGTCGATGCTATTT	CCGGGTATGTTACTAGAGTT	V2
YDR451C	YHP1	ATTAGTGACGCGGACCGACT	TGTCCACCAGTCCGATTATT	V2
YNR052C	POP2	ACCGCTGCCGGAGTTTGTTT	AGCCCTTTGGTCAGGTAGTT	V2
YER169W	RPH1	CACCTCAACAGATATTGGGA	CCAATGTACGCCAAGGTATA	V2
YLR058C	SHM2	ATTACGTGGGCCATGACCCT	CTGGAGAGTATGGCTAACTT	V2
YER171W	RAD3	CCTATGATGGAATCTTGTGC	TCAGTCCAGATTGCCGAATT	V2
YNL220W	ADE12	TTTCTATCGGGACGTGCGCT	TCCTACGGCGGTATGACGTT	V2
YNL218W	MGS1	TAGCCAGTAACAGTAGGTCC	TGGGAAGACCCTCGAAATCC	V2
YPR182W	SMX3	GTAGTAGACCCATGACACTC	AAAGCAGGTGTCAGAACGTC	V2
YDR034C	LYS14	TCAGGAGTGGAATGCACCTC	GCATGTAGACTAATCTCGTC	V2
YIR034C	LYS1	GCATCTGCATAACTAGCATC	CCTCGATAGCAATGACCATA	V2
YKL059C	MPE1	CTTCGAGCGAGAGTATTATG	ATTGTCACGCGAGTCCACTG	V2
YPL082C	MOT1	GCCCGCTTTAGTAATATACG	ATAAGCTCTGGGAATAGCCG	V2
YAL054C	ACS1	GCTCATAACCGAGTGCCAGA	ATGGGACTCCTCATCATCTG	V2
YFR037C	RSC8	ATATGCTGAACACCGAGGCC	GAGTACCCATAACTTGGTCC	V2
YDR216W	ADR1	AAACGCCTATGAGCTGTGCT	ACTGCGATGCTCGATTGGTT	V2
YJL074C	SMC3	TATGAGTCCAGACAGCTCGC	GGCTATCACCAATCATCAGA	V2
YNL136W	EAF7	TAGAGGTCTTGACACTGCGT	GGTGCGTTCATCGACTCCTT	V2
YOL145C	CTR9	TTGTAAGGCTCGCTAACCCG	CATAGGTAGCGACACTAGCG	V2
YOL021C	DIS3	CCCGGTCATTTAGGTAATCT	GAAGTTCAGGTCTCACTGTT	V2
YHR031C	RRM3	AGCCACTATTGTAAGCCACG	AGCCACTGTTTAACCTATCG	V2
YDR079C-A	TFB5	ACTTGTAGAGTAGGGCATCT	ATCGAGCGCCGAGTTCTGTT	V2
YAL011W	SWC3	TAAGCTGTGCGAATGCTGTC	CCTTGAATAGAAGCGCAGAC	V2
YLL026W	HSP104	ACGCTCTTACGATGGTTGGT	TTATTGGTGACGCCGCGCTT	V2
YLR376C	PSY3	AAGCGTTACGAAGCGTTCCC	CGTACTCTTGCATCCGTAGT	V2
YLR154C	RNH203	CATGAGTGAGAATGATCGAC	CACACGCTACCAAGTATGGA	V2
YNR012W	URK1	CCATGTAGGAAATCTTGGCA	CAGAGCTGCAAATGCTGGAA	V2
YDR404C	RPB7	AATCATCCGGCAGGTGCTTG	AGACGTTCTAGCACTCTATG	V2
YDR155C	CPR1	TATGATCTGCGACTGCGGTT	TAGGTTCCGCTCCGACAGTT	V2
YPL204W	HRR25	CCCGGATTATGATGACTTAT	GCGGAGTCTAGTTCAGTATT	V2
YBR095C	RXT2	TATACGATGACAGAGTGTGC	TAGACGTACACATGAGCCGC	V2
YLR395C	COX8	GAGCGTTACGGACCTTATTT	ATGGATCTGGTCACCGAGTT	V2
YLR086W	SMC4	CACGACTGTGAACTATCATC	GCCCATCGTGAAGAATGTTA	V2
YMR106C	YKU80	AAGACGTGCCAACTATGCTA	GCCCACATCTATACAATGGA	V2
YAL061W	BDH2	CAGAGGCTGGTACGTCGACT	CCAATCCGGTTGCACTTATT	V2
YFR050C	PRE4	GGGCCAGCAACAGATCGTCA	AGCTCATACCGCTTCATGGT	V2
YKR082W	NUP133	TGCCTACCAACCTATAGGAC	GGCCACCGTTACAACTTATA	V2
YER116C	SLX8	AGAGCGCAGTCAGATTCATG	TATCAGTCCACACGTATGCG	V2
YDR075W	PPH3	TTATTGACTGGCACGGCCCT	TTCGAGCGTCTGGCACACTT	V2
YKL112W	ABF1	TATCTTCGTAGAGGTGCGCT	TATGTGCTGCGAGCTACGTT	V2
YDL101C	DUN1	GCACCGAGTAGATAGCATCG	CACGCGATTGAATTTACTGC	V2
YDL139C	SCM3	GATTAGGAGCCACTACACTC	CCTAGCTGCATAAGTACGTC	V2
YOR191W	ULS1	TAAGCCTCGATAAGGACCTC	AAAGAATACGCATGGTCGTC	V2
YNL088W	TOP2	TTTCACATCAGCGAAGATAC	GGTAACACTATCTCAAGACC	V2
YKL114C	APN1	TATAAAGATTGGGCAACGCC	TTAGGGAAGCCATTCGCTCA	V2
YML010W	SPT5	TGGCACCACCAATGAGCAGA	AAGCTCGCATGACCGATCTG	V2
YOL090W	MSH2	GATGGCACCCTTGCATTGCT	AGCAGGCTTGTCACTTGGTT	V2
YDL070W	BDF2	TAGCGACCTTGCCTAATCGT	TAAAGTAGCGTGACCTCCTT	V2
YPR187W	RPO26	AAATAGCCAGTGCCACATCT	AACTCCGCGTGAGGACTGTT	V2
YEL071W	DLD3	TACCAGGATGAGTAAGACCG	CTGCACATTCGATTACAGCG	V2
YDR228C	PCF11	ATATCTGAGACACGCCGCGC	CGGACTCTGTAAGTCTATCG	V2
YLR035C	MLH2	GCATAGGATATAAGGCTGTC	GCCACTAGATTCAAGCAGAC	V2
YFL014W	HSP12	ATCTGAGTACGATGGCTGAT	CTATCTGCGATCAGTTTGTG	V2
YDR532C	KRE28	ATTGCACCGTGTTAGCATGT	AGTGCGTACCTATCGCGCTT	V2
YGR099W	TEL2	AATGAGCCGCAAGCCACGTA	GCTCATGGACAATAACCTCA	V2
YKL110C	KTI12	GAAGTTCATGTCACGGATCT	CGACCACTCCTGATATTGTT	V2
YOR258W	HNT3	AGCGTTTGAAGCACGATTAG	GCAGCTTTATACATTTCACG	V2
YMR039C	SUB1	TATACGGTCATCATGGTCTG	AGTCATACTCCACTGTTCTG	V2
YNL206C	RTT106	CCATCTTAGTAACGTGGACG	CACTTGAGGTTGCGGAATTT	V2
YAL021C	CCR4	TATCTGCGGCTCACTGTCGT	CGCGACGATGTATGCTAATA	V2
YNL025C	SSN8	ATTTCTCGCGTCACCGGGTT	GTAATCACTCGTTCCCAGTT	V2
YMR176W	ECM5	AAGCTCTCATCAGGAGTGTG	ACCTGATGGTACATGAGATG	V2
YNL250W	RAD50	AAGGCTCTCTCCATGCTTAT	CCGTGTCGATGATGAGTATT	V2
YDR207C	UME6	GCTTCCTAGAAAGGGACTAA	GGTTATACTTCACTACCGCT	V2
YOR209C	NPT1	ATGCTTCAGGGCCGACCTTT	AAAGCTCACTGCTCCGAGTT	V2
YOL005C	RPB11	CACGATGTCTAATCATGCTA	CTGCCAAGCAACTTAATGCA	V2
YOR375C	GDH1	TAGAACTGTGCATGTGGACT	ACTGAGCCTCTCGACTTATT	V2
YDL156W	CMR1	GCTCCCACAGTAAGTTAAGC	TTCCGTTGAACAAGGGAGAA	V2
YPL122C	TFB2	GTATCGTAAACATGCGTGGA	CCGAACAGGGTTGGAAACTA	V2
YMR005W	TAF4	AATGATTGGTCCATCTCCCT	CGGATTGACGTTTCACACTT	V2
YMR061W	RNA14	AGTTTCATCACCGGATCGCT	TTCGGCTGGCGATTACCGTT	V2
YGL163C	RAD54	GACGTGGTACCATTGCATCG	TACCATGACGCACGAGAGAG	V2
YNL124W	NAF1	GCCATAGTGAAACATCGCCA	CATCTGTCAGCATCTGTGGG	V2
YJR068W	RFC2	GCATGGAGTACAAGCTATGA	GCCTCGTCGAAATTATCACA	V2
YOR346W	REV1	GAAGAGCTAGTAACTCCTCC	TAAACCAGCGTCCGAAGGTC	V2
YIL131C	FKH1	GCGCAGAGTATAATATGCTC	TGAGTCAACATCTTCGCAAC	V2
YEL032W	MCM3	ATCGTACTGACATTGACCGC	TAACATGACTGGACAGAGCG	V2
YLR005W	SSL1	ATCATCGGGCCAGTTCGTTG	GCTACGTCATGTCACTCAAT	V2
YLR095C	IOC2	TTCGTCACGGGCAGATTGCT	AATCGAGTCTGACGTTGGTT	V2
YPL254W	HFI1	GCTGGCCGCAAATCAGGAAA	TCACCCTAGTGCTATATTGG	V2
YPR168W	NUT2	AGTCAGGTTATGGCACATCT	ACGTTAGCCTGACTACTGTT	V2
YKL028W	TFA1	CCTGACTACCAATGCAAGGA	TGTCCACGCATAAACAGGCA	V2
YHR085W	IPI1	GCCATATACTAAGACCTTGC	GATTGCTATACAGTCCCACA	V2
YOL104C	NDJ1	TACGCTTACGGACTGTCGGT	ATTCGCTGACGTAGGAGCTT	V2
YCR042C	TAF2	CACTGTGAGTAATGATGACG	ATACACATCGGGTTAAGCGG	V2
YPR070W	MED1	CGTAGGATACTGGATCATCT	ACTTCAGCCTGGCGAGTGTT	V2
YDR156W	RPA14	TTATGGCGCTCACCGCTGAT	GCACGAGTTGCATATTTGTG	V2
YGR124W	ASN2	ATTCTAGCGAGCCCGGATCT	CCGTAGCTGCGAGTATTGGT	V2
YDR217C	RAD9	AGGCATTTGTCACACTGGTG	ACAGACATTGGAAGCTATGC	V2
YDL160C	DHH1	TAGCGTCACCGACTGTCTTG	CGAGGTACGATTGACTAATT	V2
YKR017C	HEL1	CACTCCAGGTTATGTAATCG	TACATCGTAGAGACGTGTCG	V2
YDL182W	LYS20	GCTAATGCACGTTATGGAAG	GTATAGACACTGACGGACAA	V2
YMR273C	ZDS1	ACCGTCGTTGCATAGTGGTT	ACGTCTAGCTTTAGCCAGTT	V2
YDL047W	SIT4	CACCGTGGGTTAAGAGTTAT	GACCTACCTTTCGACGTATT	V2
YML074C	FPR3	ACTGAGTGGCGATGTCCTTT	TCCTACTTTGGGAGCGAGTT	V2
YER120W	SCS2	ACACGATAGGTAGAGTGACT	GACCTCTCGGCATACTTATT	V2
YML121W	GTR1	GCGGAACACTTCTTAAACAC	TCGCCCTAGAAACACGGGAA	V2
YLR216C	CPR6	TATACTGTTCGCAGGCCGCT	ACATGACTCGTTGACACGTT	V2
YHR154W	RTT107	CCACGGAGAACATATCCTGA	GTCCACATGAACGCAAGCTA	V2
YJR035W	RAD26	TATGTATGCCCAGCCATGCG	CCTATAATGCCATGTGATGC	V2
YOR014W	RTS1	GAGCTTGATGCACTTTCCCT	CCCTGGATCTTTAGACACTT	V2
YBR115C	LYS2	GGGATATAACTAAGGCTTCC	TTTAGTAGGACACCGGCCTC	V2
YOR151C	RPB2	GGACTGACACTCTCACATAG	TATAGTGAGCCACAGTCCGC	V2
YBR195C	MSI1	TAGAGCCTCAGCATTCATCG	CACTATCGAGTAATGGAGAG	V2
YLR135W	SLX4	GGGAAATATAAATCTGGCCC	AAGGAAGAGTCCCTCAATCA	V2
YMR239C	RNT1	ATGGCGATTGAACGAGCCTC	ACGTAAGCTAGAGTAAGGTC	V2
YLR418C	CDC73	TTGAGGAGACCACTTACGCC	TATACGCACAAAGAGTCTCC	V2
YFL029C	CAK1	ATGTAGTCCGGCCACTTGCT	CGGATACCTTTACCCATGTT	V2
YPL240C	HSP82	TGGCAGAGCAAATCCCGCAA	TACGCTGTGACATGAGCCTT	V2
YKR062W	TFA2	GCCCAGGTAGTACAGTTACG	ATAGTGCCCGTAAGTCTCCG	V2
YPR179C	HDA3	ACAAGCGATTTGCATCTCGT	GTCAGCGGTCGATTCTCCTT	V2
YBR175W	SWD3	AGAGATTCGCTCAACGCCCG	CAATGGTCGGTAATCACGCG	V2
YDR098C	GRX3	TGTCAGACCTTGCTACATCT	AGCTGACCCGTCGTACTGTT	V2
YJL006C	CTK2	ATCTACCTATCCGGGAGGGT	CTGCGATGACTGATGAGCTT	V2
YER092W	IES5	ACAACGGGTTCTAACTCGCG	ATGGACATGCTTTGAACTCG	V2
YAL038W	CDC19	TTACGGACTCTGACCCATCT	CGGATTGACTGATACGTGTT	V2
YNL273W	TOF1	TAGAGTATCCCACGACATGC	GCTGAGATTAAAGTCCAGGA	V2
YIL084C	SDS3	ATCATCGACCGAGGCTTGTG	ATATCTGCGCCAGTGCGATG	V2
YPR133C	SPN1	CCTCCGTAGGGATCGTATGC	GATTTCGCGCTACGTCGCTT	V2
YOL006C	TOP1	CTATCAAGGCAAGCGATCTA	GCAGAGTTGACAATACTGGA	V2
YDL091C	UBX3	TATCTGTAGGTCAGGGATCT	TTCGGCGACCTCGACTTGTT	V2
YKL005C	BYE1	CATTCATTGTGAGCATGGTG	GATAGTATTCACACCCATGC	V2
YDR510W	SMT3	TGATGTAGGACAGCCACCAC	GCCCACAGCAGAATTTAGCA	V2
YGR042W	#REF!	ATATGCGTCCCATCAGTGCG	AGATGCACTCTAACCGTCAG	V2
YCR020W-B	HTL1	ATGTACCCAGTCACACTTAG	GAGATCGCTACATTTAGACG	V2
YER148W	SPT15	TTTCACTGGAGCGAGCTTTG	TATCCTAGGGTAGTGCAGCT	V2
YDR502C	SAM2	CCCGTACTAGCATTTAATCC	GAAACAACTACAGCGCGTCG	V2
YMR117C	SPC24	ATTGCTAGACGCCCGCGAAT	ATATACTGTGGCATGGGCCT	V2
YDR026C	NSI1	GAGACAGGAGCATATTGTAC	AGCTGATAATTCAAGGCACC	V2
YIL061C	SNP1	CGCACGCTCTGCATTGATAT	CGATGTAGCTCCATTCTATG	V2
YBL035C	POL12	AGGGTGCCTCTCCTCATGTT	ATGTTGTCAGCCCGCCAGTT	V2
YBR081C	SPT7	GCCGCGTGATGACTATTTAT	TATGCTTAGGGAGCCGTATT	V2
YIL112W	HOS4	TATCTCGCTGGACGGGCTTT	AATGATTCAGTCCGCGAGTT	V2
YGL202W	ARO8	CGCTAGAGGTCATTCATACT	GGACGCTTTAGACCCTTATT	V2
YOR243C	PUS7	ACATGCCAGTAATGGTGCAG	AGATATTGACCACCATCAGT	V2
YPR161C	SGV1	TACATGCTGGCAGGTAGCCT	ACGCGGAGTTCTGGACACTT	V2
YNL007C	SIS1	CCGATTAGTTTACAGTCGCT	ACTCGTGTCATATAGCCGTT	V2
YPL022W	RAD1	ACATCTGCGAAATGCGGCCA	CCATGCTGTACCATATTGGG	V2
YNL118C	DCP2	GCAACAAATGAATGGCTTCC	GACCTCACATTGACCATAAG	V2
YPL235W	RVB2	GTGAGACATATAACCTCCGC	GATACGCTACCATTAGAGAG	V2
YPL126W	NAN1	TATCGGGCTAGGGTCTTGCT	ACGTCCTCGATTGCCATGTT	V2
YPL139C	UME1	GATGCACTGCGTTCCATGTT	ACTGAGTGTGAATCATGGTC	V2
YHR197W	RIX1	CATCGAGAGGCAGATTTACG	GGGAAGAAATTAACCGTCCG	V2
YDL126C	CDC48	ATTGATGATGCCCGCGTCGT	TTTGCGGCGATAGCGTCCTT	V2
YMR236W	TAF9	CATGCTAGAGTGGTACATCT	TAGAGTGAGCGATCCCTGTT	V2
YBR160W	CDC28	CAACGACTTCGATGACGGGT	ACTTGTTGCAGAGTGAGCTT	V2
YER089C	PTC2	ACTATATGCTAGACGAGCGG	AAGTATCTCTACACGCCGGG	V2
YMR182C	RGM1	GATCCACAAATAATCTCGCG	GTAGCATACTTCCTAACTCG	V2
YNL085W	MKT1	AGGGCTTCATTACCTCATCT	TTGATCGACTCCCGCGTGTT	V2
YOL094C	RFC4	TGATATGTGACACGCTTGTA	CTACGCTAGAGAGCTTTGCG	V2
YLR134W	PDC5	GAATGCCTTCTCACTACTGT	TCTGTACGGCTAGGTCGCTT	V2
YBR049C	REB1	AGATCCCGCGTCAGGCATAT	GCACCGTGATCCAGTATATA	V2
YKL214C	YRA2	TTCTGACGACGAGCGTACTG	TATCTCGGGCCATCTGGGAT	V2
YER142C	MAG1	TAGTGTGCTACAGCCTCTCG	GCACTCATCATCAGCAGGAG	V2
YCL040W	GLK1	ATTAGGCGACCACGAGCTTC	TTCACAGGCCAGGACACAAG	V2
YFR013W	IOC3	AGCTACAGGTTCGCTAACAT	ACGGCGATGATATAGGTCCT	V2
YPL194W	DDC1	AGTACACCCGACCAGTGAAG	GCTCACAGGATTAAGTACAG	V2
YDR289C	RTT103	CCTTCTTGAGGATGTGAGAT	ATCCATTGAATCCATGTGGC	V2
YBR089C-A	NHP6B	CCTCCGGTGCGAGTTATGTT	GAGTTTGACCTCCTCCAGTT	V2
YKL074C	MUD2	AGATGGCCGCTCCTCAGATT	GCCATAACCAGACAGGCGTA	V2
YDL116W	NUP84	ACAGTTTGGTAAGGCTCCTG	TTCAGGACCGTATTGTGCTG	V2
YOR279C	RFM1	CCCGCGTCGGCATTGTTTAC	TCGGACTACTGACTCGTATT	V2
YFL017W-A	SMX2	GCGCGTGCATCATTCCTTAT	ATTGTGCGTACACTGCCCTG	V2
YDR469W	SDC1	GGAGCCTGTAGATCCTCTTT	CGGCATCTTGTCCAGGAGTT	V2
YDL076C	RXT3	CGCATGGACAAACACTGGCA	TGACGTAGCCGATGTGCTCT	V2
YPL181W	CTI6	AGAGAGCGACGGATACTACT	CTACTTGCGGGAGAGTTATT	V2
YER022W	SRB4	GAAGAGTTATCAACCGGGAC	TGTTAAACCAACGGCCTACA	V2
YDL164C	CDC9	TGCAGAACAGCAAGTTTGGA	TCCTAACACACAGTGAACTA	V2
YOL135C	MED7	AATTTAGGGTCACGCCGCCT	GGCTCGTATAGTTGACACTT	V2
YMR053C	STB2	GGGTTGCACCTAACTTACTC	TATGGAGACCTACCCGGTTC	V2
YGL090W	LIF1	TATCTCGACGCAGTGTCAGG	ACTGACTCATAAGGGATTGC	V2
YOR179C	SYC1	ATCATTCTGGGACATGGATG	CTGAGCATTAGCATTGATCG	V2
YEL019C	MMS21	TAATGCCGACTTTACCGCGT	AATTTCCCGTCAGGGCGGAT	V2
YPL138C	SPP1	TGCTGACACCAAGGACCAGA	TTGATCGCGCTGGACATCTG	V2
YJR082C	EAF6	GAATTACCAGGAACCGAGCC	AAGGCGACGGAAGTATATCC	V2
YDR419W	RAD30	TCCTAGTACACAGCGAGTGC	ATAGCTGTCGAATTGCGTGC	V2
YPR019W	MCM4	GCCTGATCTGCAATCTATAC	CTGAGAGAGGAACATCGACC	V2
YDL105W	NSE4	GATTAGAGCCACCTAGTCGC	GACAGAAGATCCATTCGGAG	V2
YJR140C	HIR3	TTTCCAAACAAAGATGGGCC	GGAGACCATGAACCGATTCC	V2
YDR191W	HST4	TGAGTTCCTGCACCGTTGCT	GCAGTAGCTTTAGGCATGTT	V2
YHR118C	ORC6	CACTGATGGCGATGATTCGT	TACGTCTTGAGAGGGTCCTT	V2
YOR298C-A	MBF1	AGAAGGGCATTGGACCATCT	ACTAGCGCGTAGAGCCTGTT	V2
YDR363W-A	SEM1	TGACGTGGGAGCTACTCGAT	ATATCTTCGAGAGGCGCATG	V2
YLR113W	HOG1	TTACCTCTGCGATAGCGGGT	AGTAGGCTTGTGCATAGCTT	V2
YPL184C	MRN1	GACTGGTCATCATCTCATCT	ACCCTTGAGTTCGAGGTGTT	V2
YPL061W	ALD6	TATGGCAGCCTCAGCTTGTG	AGCATCGAGTGTAATTTGCA	V2
YHR090C	YNG2	ATTGTTTCCCGGACGCCTGT	CGGGTACGGATACTTCGCTT	V2
YDL084W	SUB2	CATGGATCGCAATTCACGTA	GAAGGCATCCCAAGCACTGA	V2
YHR077C	NMD2	GAGGTGCATCTCACTCCATG	CCGTAGTATGAATGACATGC	V2
YKL113C	RAD27	GAGGCTTGAACAGTATACGC	GCATCTAACACATGACGGAC	V2
YOL004W	SIN3	TTTCACGGGCGATATGCCTG	TACAGCCGGGCACTTGTGAT	V2
YCL061C	MRC1	CATAGGTGTTAAGTTCCCTG	CACTATGGGTTTAATGGCTG	V2
YPL128C	TBF1	ACGGCAGATTCATTACATCG	ATCTACGCAGGACGTTGTCG	V2
YDR176W	NGG1	TATCTGGCTACAGGGCTATG	ATTGACCTGAGACGCAGTCG	V2
YGL173C	XRN1	TATAGTGCCAAATGCGCGAA	TCACTCGTCGCACTTATGAT	V2
YJL090C	DPB11	AAGGAGCACTGGTTACACAT	AAAGGCATTGTCGCTAAGTT	V2
YDL201W	TRM8	CCGGCATTTACATTAGTTCG	CAGCGTCGTCGAGTTTGTTT	V2
YAR003W	SWD1	ACATGGTTGAAAGCGCGTCA	CATTATGGATGAGCTTCGGT	V2
YCL016C	DCC1	ACTATCCGCTGAGGGCTGTT	ACGCTTATAGTGTGGCAGTT	V2
YLR117C	CLF1	AGAGCCCGAGTCACGTAACT	CAGCTCGTGTCAGTCGTATT	V2
YPL129W	TAF14	AGCTGCACTGGATTCATAGT	GATTGCTCGCCAGTCTCTTG	V2
YBL093C	ROX3	AACCGCTACTGACTGTCTTT	TCAACCCGTGGGACTGAGTT	V2
YEL061C	CIN8	CCAATGGTGTTGAAGGTACT	CAGCGTCGGTCATAGTTATT	V2
YDR295C	HDA2	CACAGCCTGCAATTCTTGTA	CCGACTCATAAAGATCGTGA	V2
YAL019W	FUN30	TATCGAGGTGCAGATCCGCT	GATTAGGTCCTCCGCACGTT	V2
YPL015C	HST2	CCCGCCCTAATGTTAAATGA	AGAGACTTCCCAATGACCTA	V2
YBR057C	MUM2	TATTTCTTGGCACGCGGCCT	TTGGAGATCCGTCGCCACTT	V2
YMR275C	BUL1	TATGTCGCAGCCACTTCAGG	CGAGGTTCTAACATGATTGC	V2
YKL032C	IXR1	TCGTACTAGGTATCGGAGTT	AATTGCCCTGGACGGGTCTT	V2
YNL112W	DBP2	GCTCAACTCCAACGATATGA	CCTGCGCGTAAATAATCACA	V2
YGR056W	RSC1	GAGAGCCATTCAATCACTAC	AGTGACACACCATTATGACC	V2
YGR163W	GTR2	GGGCTAAGTATAATCTATGC	TGTTATACACGCCCAGATCA	V3
YJL011C	RPC17	TACTGGATCGCATCGTAGTG	TCTCAGGCTGCATTAGCGTG	V3
YLR052W	IES3	GCACGAGTTAGAACACGGAC	TGAACCACAGTGTTGAAACC	V3
YDR409W	SIZ1	TGAACGGACCTGAATCCTGC	GTTAGAGCACCGGACACATC	V3
YHR143W-A	RPC10	TAAGTCGAGATAATCGCTCC	TTGTTGCCACGCTATCCAGG	V3
YDR440W	DOT1	TACTCTTGAGCACGGGGCTG	TATGTTTCCACCTGACACTG	V3
YKL160W	ELF1	ATTATCATCCGCCAGACGGG	ACTATTCTTAGAGGAGCTGG	V3
YIL063C	YRB2	GTCCGCAGGATGAACTATAC	GCTACTTTAGAAGACTCACC	V3
YNL068C	FKH2	CAGGCGTCAGTAGTATTCAT	GCGCTAATATCACATAGCCC	V3
YDR005C	MAF1	CCGACCAGAGTTAGTAATTC	CCGAGCTGACTAACGATTTC	V3
YJL184W	GON7	CCATGTGTTTAAGCTGAGTG	ATACTGGCAGAAGTCCGCAC	V3
YHR183W	GND1	TACGAATAAACAGGTGTGCG	ATAGACTGCTACCAGCGTCG	V3
YEL009C	GCN4	AGGTCCTCCACATTTGATTC	TAGAGCGTAAGAGCTGTTTC	V3
YNL059C	ARP5	CCCGCTAATCTTGTAGAATC	CACTACTATGTGGTAAGAGG	V3
YBR231C	SWC5	TACGAACACCGTCGCAATTA	GGCGGCTAGAGAACCATAAC	V3
YDL197C	ASF2	GCGCATTAAGTCCATTGAAG	AAGCTACCAGCCCATTACAG	V3
YDR432W	NPL3	ACCCTAGCGGCTTGATGTGC	ATTATTGAGCCCGCGCTGTG	V3
YLR262C-A	TMA7	GCGGTCAGATTTCAGGCAAA	GTCACTCGTGTCCAGGATGT	V3
YAL027W	SAW1	CCATGCGATGAAGCTGTTGC	GCCTGATGCACAATAGACCA	V3
YGL238W	CSE1	TGAGGAACACGGTGCAATAC	AGATGTACGTCAATTCCACC	V3
YER162C	RAD4	GGAGTCCATCCATAGCAGTC	GAGTTTCACGCATGACTATG	V3
YKL139W	CTK1	ACACTTCCTGAACATTGGGC	AATACGAGCTAAGTGGCCAG	V3
YER063W	THO1	GCCTGATGATTAGTGACTCT	CCCGCATCAATGAAATGGCA	V3
YJL047C	RTT101	CGAAGCTCGTTTAATCGGTG	ATTTCTCAGACCCGCGTGTG	V3
YJL081C	ARP4	GCGCATAGACGAGCATAAGC	AGTCGCGCTGTCCATTTGCT	V3
YGL207W	SPT16	CGGAATCTATTTCAATGCGC	CATAGATGCTGAGCTGCTGT	V3
YPR086W	SUA7	ATCATCCGGTCATGCCGAGT	ATGGCTCCAGTTCCAGCTTG	V3
YIL128W	MET18	GAAGCACTTTCAAGCCGAGC	GATCACCAAAGAAGCGTCGC	V3
YMR037C	MSN2	CTCTAATCGGCAGTCAGGTG	AGACCCATGTTCGGCAATGC	V3
YNL201C	PSY2	AAGCGGACTGAACTTTCTGC	ACCTGTAGAGTAAGTGTCAG	V3
YOR060C	SLD7	CATCAGTCTGGATAAGCTAG	CCTCGTAATCTAGCTTAACG	V3
YLR109W	AHP1	CACTTGTAGCCAGGTATCGG	CCTTCGTTAAGATGTATGGG	V3
YJL065C	DLS1	GGAACTCTCTTCCATATGGC	CCCTAATGATACAGACTTGC	V3
YNL082W	PMS1	TGAAGAGGCACCGAACCTAC	AGCACACCGTTGAATTGACC	V3
YPL268W	PLC1	CCGAGACTTAAATGGATCGA	CTGTCGCACGAAGGAGAAAC	V3
YAL015C	NTG1	ATCAGTTGTCTAATGCGTGG	CTAAGGGCTGTTAATCTTGG	V3
YGL252C	RTG2	AGTACACTTGAACTCCATGC	CGCTATAACGTATCCGATCA	V3
YGL009C	LEU1	CCTGCGTGCAAATCTAACAA	TGTACCGGCATCACCTTTGG	V3
YBR272C	HSM3	TCCCAGGAGATAAAGCCTCA	TATTGTCGAACATGGGTGCC	V3
YGL044C	RNA15	CGAATTAACCGCAACTGCTA	CATACTTACGAAGCTGTACC	V3
YNL139C	THO2	CTCATAGTTGGTAATACGGG	CATACGTCACGACTAGCTGA	V3
YJR093C	FIP1	TACCTATTGACCAGTGGGCG	GTAGATGCTATCCCAGCTCG	V3
YMR120C	ADE17	AGCACCTGACGCATCATAGG	TACCATGCTGAAGGAGTTGC	V3
YOR274W	MOD5	GGCCTAAGAACAGACTCTCA	AGCAGTGATTCATGCCTCGT	V3
YPL008W	CHL1	TCCATCAGAAGACAGTGTGA	CTACTGGACGTGAGCTGACT	V3
YIR033W	MGA2	ATACCTGAGCCAGAGTTGCG	GATACCATAGCATTAGGTCG	V3
YDR301W	CFT1	GCCTAGCTGGCATTCTTCAT	GATCACTACACAGTATGTCC	V3
YBR278W	DPB3	ACCCAGCATATAAGGTCATC	ATAGGGACTACAGCTCGCTC	V3
YGL070C	RPB9	CCGGGAGCTTAATATACATC	CCTATCCGTACATATCGAGG	V3
YGL253W	HXK2	ACATCGGGTAAACGCCTCGA	AAACTGGTCTGAACGTCCTC	V3
YIL033C	BCY1	TACATACCACGACCTTGAAG	CAGGATAGATCAGCTTACAG	V3
YMR311C	GLC8	CTGATTCCACGAGGTATGTG	CTCACGAGTAGTCATGGGAT	V3
YCR033W	SNT1	AACTGAACATACCCGGTGAC	ACACCCGGATAATGTCTTTC	V3
YDR485C	VPS72	AATAGGCCGTCAAGTTGCCC	ATAGCGCCGTAACCGTCTAG	V3
YMR227C	TAF7	TCATGTATGGAATGCGTTGC	GTGTCAAGCACAAGGCACCA	V3
YGL112C	TAF6	CAGATCCATGAATCAGATGC	CATGCTAAGCGATATGGCAG	V3
YGR104C	SRB5	AAGATGGCCCAATGTGTTGA	TCATCATCGTGCAGAGGCTG	V3
YLR180W	SAM1	ATCCATAAGGTCGGGCAAGC	TCAGAGTCCTGAACAGCCGC	V3
YLR335W	NUP2	ACCACTTCGCTTGAATGACG	AGAACAAGACCATCGCTCGG	V3
YER111C	SWI4	TGTGAAGCACCAACACGGCA	CCTCACGATAAAGTATGGCA	V3
YPR120C	CLB5	ATTGTAGCGCCATAGCCTCG	AGAAGACGCTCTCAATCTGC	V3
YGL131C	SNT2	TTGAGATTCACCAGACCAGC	CATGAAATAACAGGTGGCGC	V3
YOR304W	ISW2	AATTTCCGCGAAGCGTGAGC	ATGGAGACCCTAGACACGTC	V3
YLR358C	#REF!	TGTCACGACCACAAAGGAGC	ATTAAGCGCACAGAGGTCGC	V3
YDR318W	MCM21	GCACTCGACTCATTTACATG	GGCGTCACATATACAAATGA	V3
YPR132W	RPS23B	ATCAGCCTGTCATGGTCCGT	CGTGCTCATATAGCTCGCGT	V3
YGL060W	YBP2	ATTGGTCACCTAGCACTCGG	TCATAGATGTCAGCACTGGG	V3
YDR226W	ADK1	CACGAGAACCACGATCTTTA	AGTACACGCGCAGAATGCAC	V3
YML102W	CAC2	TCAGCTCGGTAACTTGCACG	TCCTTACAGTGGATGGAATG	V3
YDR071C	PAA1	GGTTCTACACACCATAATGA	CACCTTTCGAGAGGACGATG	V3
YDR363W	ESC2	TATGCACTCAGACCTATTTG	GACCTACGATTGTGACGAAT	V3
YKL035W	UGP1	TACATGGCACTAAGGGTCAG	CATCCGTGAAATTTCCTGGG	V3
YPR018W	RLF2	CGCTGAGACAAAGATTTCCA	TGACCGAGTCTCACGTTTGG	V3
YCR066W	RAD18	ATAGACTAGCGCACTCAGGG	TTGCTCGCTACACTGGATGG	V3
YDR303C	RSC3	GCCATTTCTTCAATAGCTGC	ACGACGACGTTAATCACATC	V3
YMR044W	IOC4	CAAGGACCCGCAAGTGTCTA	CACAGTAATGAACCGTTGCC	V3
YER159C	BUR6	AGATTGAGACCACTAGCTCC	ATGCCAGACTCACTGTTCAT	V3
YOR038C	HIR2	ACGATGCAGGGATGCCATAT	GAGTAGCTCACTCCACATTA	V3
YDR448W	ADA2	AAACTACGTGGCTAATGGCG	ATTTGGCATCCAGTCGCTCG	V3
YDR308C	SRB7	GCCCACGAGCAATTTATTCA	ATCTAGGGGCGATATAGCTG	V3
YIL101C	XBP1	AATTCTCTGTAAGCGCGGCG	ACCTTATACCGATAGCGATA	V3
YCL011C	GBP2	GAGATGATGCTACCCAGCCG	CATCGACCAAGATATTTCGA	V3
YJL115W	ASF1	GCATCAGTTTAATGAGTGCG	GTAGCACCTTCTTAACGTCG	V3
YBR202W	MCM7	AGATGGCACTCACGTCACTG	ATATACACGCGAGAGCCAGG	V3
YGR254W	ENO1	AAAGTCACCTGCACGTTGCG	AAACTATCATTACCCGGTCG	V3
YHR061C	GIC1	TCACAGGCTTGCGCACATTC	GACCGGGTAACACGTATTTC	V3
YJL164C	TPK1	CCGGCACATTAGTCAAATAC	TGGATAGCAGACAGCACACC	V3
YJR032W	CPR7	AGCGCAGGCCAATGGTTATA	AGGAGAGTCTCATATTCGCC	V3
YJL130C	URA2	CAGGTCTAGGAATCTTTAGC	CAACGATACCGAGCCATTAG	V3
YDR092W	UBC13	CTCTGATGACGATGTAGGAT	TCATAGGTCGTGACATGGAT	V3
YOL068C	HST1	GATCTAGTTACAGGACGTGC	GCGATGGAGCGACTTTCTCT	V3
YFR028C	CDC14	GGCACACATTATTCGCAAAC	GCCGAAGCAGACTTAATCAC	V3
YDR361C	BCP1	TCACACTGCGGAATTAGCGC	AGGCTTCAGCGATTGTATGT	V3
YDR138W	HPR1	AGCACACTATGACCAGGCAG	CCTCTGTACTAATGATGCAG	V3
YMR033W	ARP9	CCTGTAGACAAATGACGGCA	CAAGACCTGACAATCGCGGA	V3
YBL052C	SAS3	ATACTACGCGCAGATAGCGG	AAGCATTGCGAATCATAGCC	V3
YJR006W	POL31	TACACACCTAGGAACTCAGC	TATGGGTGACCTAACCTCGC	V3
YLR015W	BRE2	GGCACATCGCAAGATATCGA	ATGACTCAGGCGTAGCCATG	V3
YJL127C	SPT10	AAGGCATTCGCAGCTTATAG	CGAGTTAATCTCAGCGAACG	V3
YDR146C	SWI5	CATGGGCACGAATATCATAC	CATGGGCTTAAACCTGATGA	V3
YKL210W	UBA1	CATCAGTAGTAACAGGGAGC	ACGACAGTAACATCATTCGC	V3
YOR033C	EXO1	AGGCGCTTAGTAGATCGTAT	ATCCCTATGTGACGGAGAGT	V3
YAR002W	NUP60	GCCACTTGGATAAGAGCTAG	AGCTACGCGCTTTGAACACG	V3
YER038C	KRE29	GGCCTCTCGTGCCATGTATT	TCTAAGTAGCAAGCACCCTA	V3
YIL021W	RPB3	TGGATAATACCCTTCAACGC	CTATTTAGTCGAATGGAGGC	V3
YCR084C	TUP1	TACTACTCACGATGACTCGG	CATTGGCGTACACTACTGGG	V3
YML065W	ORC1	TATTTGCTACCAGGCGCACG	TCTGCACCGCCAGTTATTGG	V3
YOR213C	SAS5	GCACCTTCATCATGTCAGTG	AATCACGCTTGGTAAGTTGG	V3
YPR065W	ROX1	CATATTCGATTAAGGGTCGG	GTCACTACTGGAGCATTGGG	V3
YMR127C	SAS2	TGTACCGACACGCTCAGAAG	TTACATAGTACACTGCGCGG	V3
YIL122W	POG1	ACATACTACTTAGGAGAGGG	TATCTACCGCCACGTATGGA	V3
YLR027C	AAT2	ATAGCGGACCACATTGCTGC	CCGTCGTATGAATCTACATC	V3
YKR048C	NAP1	TAAGAGTTCAGACCACCTGC	TGACCGCTGACATTTCGTCG	V3
YLR285W	NNT1	ATGATCTCGCCAACGGGCTA	TCAGTTCAGCGCAGTCCATG	V3
YKL108W	SLD2	TAGTACGGGTCAGTCTCTGT	AATACCTGGTCAAGAGGGCC	V3
YGL048C	RPT6	TGATACTGCCCATACTGGCG	AGGCACCTACGATATGCTCG	V3
YOR001W	RRP6	CGCACGATACACGTACTTTA	TATGGGACCCTATGCCACTG	V3
YNL072W	RNH201	ACACGGATCACATCGTAGTC	GCGTGCAGCAAACTCTACAA	V3
YKR002W	PAP1	GGTACAGACACTGCGACAAC	TGGTAGAACCGAACCCAGAC	V3
YDR520C	URC2	TGCACGAGTCTCCAGTGTTG	ATTGGTCATACAGCGCCAGG	V3
YFL013C	IES1	CTACGCTAATACCTAGTCAG	CCTACCGTCAGGATATTATG	V3
YDR227W	SIR4	GAGCCCAGTTAATCCCATTC	ACCGAGACGGACGTACTTTC	V3
YER041W	YEN1	CGATACTCATCAATGCAGAC	CATTGACGAGAATCCTAGAC	V3
YKR029C	SET3	GATGGACCTCCTAACTCTAG	TTGCCAGCATTCAGGACACG	V3
YML073C	RPL6A	GGCCACAGGATCTAAATACC	GCTTTAACATAAGGCACACA	V3
YCR086W	CSM1	TTACAGCCACGAGATCGCAG	GATCAGCGACTATCATGGCG	V3
YOR048C	RAT1	CACAGGAGGTAACACTTTGC	TGCTCATTATTCCTAAGAGG	V3
YPL178W	CBC2	GATAGTAGCCTCACGACCTG	GCGCGTAGATGACTTTAGCT	V3
YGL094C	PAN2	ACCTGTTCTAAACCAGTGGA	ATTGACCGACCAGGTTCGTC	V3
YDR052C	DBF4	AATGCTCGGGAAGGCTACTC	AGAGACTACCTACCAGCTAG	V3
YHR167W	THP2	TCCTAGCGCGTGCGATCTTT	AGACTGTACGAACTGCGACC	V3
YLR453C	RIF2	GCACTAGACGAACTGACTAC	GACCAGGGTGTGCAATTATC	V3
YHR120W	MSH1	CCGTACATGCAATCAAGCTA	GACATAGATCCAATCCGCTA	V3
YDL220C	CDC13	GAGTGATAGCCCTCCACAAC	GATGCGTACCTCTTCCATGT	V3
YML098W	TAF13	ATACGACTTCAAGGGACGCC	AGTTCATACCCACTTCGTAG	V3
YJR046W	TAH11	AGAGCTTGTCAACCTAGCGC	AGCTACGTCTCACTCTATGT	V3
YNL107W	YAF9	CATCTTGCGCGATAGGCTGT	CACCGTAGGCACATTGATTC	V3
YER091C	MET6	AGGAGGAACTTATGTCAAGC	AGATGGCCCTAATTGTCCGC	V3
YBR135W	CKS1	CCGTAGCATAAAGAGCGGCA	CAGCATTGTAAATAGGCGGA	V3
YGR074W	SMD1	CCTATGTGTAGACAGAGTAG	TGAGTACACATCACATAGCC	V3
YPR068C	HOS1	CAGGACAGGCGATCCGATAT	CGATATACGTGCAGACTATG	V3
YNL330C	RPD3	GCCGCGTAGACAATAGATCA	TCATCGCTTGCACGGTGAGT	V3
YNL317W	PFS2	TTATGACTCAGCAGCGAGCG	AAATTGCGATCAAGGCTCAC	V3
YLR321C	SFH1	AATGCACGGGCACCCTGTAT	AATCATCCCTGGAGCGGAGT	V3
YML061C	PIF1	CACAGTCATTAAGAGGCTAG	TATTCAGGCACAGACACACG	V3
YDL131W	LYS21	GATAGTAGGCTGACTCACTT	TATGGGTCAACACATCCCTA	V3
YKR008W	RSC4	ATAACCATTTCGCAGAACGC	CGCTTGACACAGAAATAGGC	V3
YBR198C	TAF5	ATACTTGGGTGCAGCTACGT	ATATTCGCGTCGAGTGAGTT	V3
YBL008W	HIR1	ATACAGTAGACAGATGTGGC	CTAAGCGCATTGAAGGTTGC	V3
YOL058W	ARG1	ATACCCTGGGAAGCAGATGC	ATTGCACAGCAGCCGGAATC	V3
YBR253W	SRB6	AGGACCACCTGAAGTTTGCC	ATAGGACACGTAATCCCATC	V3
YLR277C	YSH1	TATAGAAACGAAGCTCTGGC	TATTTCGCACGGAGCACTCG	V3
YBR279W	PAF1	CACGAATCGGAATTGACGTA	CGTGGCGATAATACGAAAGC	V3
YPR025C	CCL1	CCATCTGATTCAATATCGGC	CTATCTGGGCTCAGGATGCT	V3
YPR107C	YTH1	GGTGCCACTTACAAACAACC	TTCGGGAAGACCAGACAGAC	V3
YER030W	CHZ1	TTGGCGCATCGCTAGTCACT	CGCATGGTATCTAAGACTAG	V3
YPR175W	DPB2	TATCCTCTAGCACTGCGTGG	CGCCGCGAAGGCAAGATATA	V3
YNR010W	CSE2	GCCTAAGACAGGTGGACAAC	TTGTCACTAACACCAGAGAC	V3
YGL037C	PNC1	AAATGATGCTCAAGACTCCC	CGCGGCTACACATATTTACA	V3
YKL216W	URA1	CCCGTGAATATAAGTGAAGC	CCTGGATTTGAAGCGTATAG	V3
YJR017C	ESS1	TTCATCGCGCTCATGTGGTG	AACAGCCCGGCATTCTTGTG	V3
YBR087W	RFC5	ATGTGATTCCCACTCAGGCG	ACACGTCTGACAGTTGCATG	V3
YGL122C	NAB2	AGAACGTAGCCCAAGGTTGA	ACACGGCTTGAACGTAGGTC	V3
YOR189W	IES4	GCGCTCACAGTTATACTAAG	TATAGCCTCACATTTGCCAG	V3
YOR229W	WTM2	TGAGCCTTCTCCATAGCGTT	AAACTTCACGAACTGCTTAC	V3
YDR028C	REG1	GAGACTCGCTGCATTGCCAT	GCAGCATATACATTCAGCTC	V3
YGL058W	RAD6	ACGAGACCATAAGTTCTTCC	CGGAGAGACAGATTACACGC	V3
YDR182W	CDC1	TATATTCTGCCACAGCGGCG	GCAGCTACTATACGTCATGA	V3
YEL044W	IES6	CATCTGATAGCATTGCGGTG	CCGACTGATGAATCTAATGC	V3
YOL148C	SPT20	GCACCTCACCAATGATAGGA	CAATGTATGACAACGGCGGA	V3
YOR052C	#REF!	CTCGGATAGTGCATGATATG	TATACTGCGCGACATGCGAG	V3
YGL066W	SGF73	CTGGCATAACTCATAAGAGC	TATTAGCACCCGGAAGTCGC	V3
YDR451C	YHP1	ATGCCACGAGGATGCACTAG	TTCGTACAGAGTCAGGAACG	V3
YNR052C	POP2	CTCGAAGCGTGGTCAATAGC	CTTACAATGGGCTGCAAGGC	V3
YER169W	RPH1	GGAGCACTCACACATAGTAC	GCGCCTAGTATTAAAGTACC	V3
YLR058C	SHM2	GGAATCTCTTGAAATGCTAG	TGGAGCTGCATCTACACACG	V3
YER171W	RAD3	GGGCATCATTTACACCTCGG	ATTCTTGACCGATAGCTGGG	V3
YNL220W	ADE12	TACCTAACGACATTTGTGGC	ATGCGGAAGTACCTTGTTGC	V3
YNL218W	MGS1	CATCTAGGTCCAGGCGTCAC	AATGCCCAGTTCCACGTTGG	V3
YPR182W	SMX3	ACGCACTGACGATCATTCGG	ACGCCAGTTAGTTCAAATGG	V3
YDR034C	LYS14	CAACATAGATGCCGGAAGTG	CTCACTGATGGGTAAGTATG	V3
YIR034C	LYS1	TTCACCGAGACAAGGCGAGA	TGTTAGACACCCGTGCAAGC	V3
YKL059C	MPE1	TTGTAGTCCCCATCTCGGGC	TATATGTTGCCACCGTCGCG	V3
YPL082C	MOT1	AATAGTGTGCAACTCTGCCC	AAGCTGGTACAATCGTGTGA	V3
YAL054C	ACS1	GATCGGCATCTAGCTTGACT	GCACGCTGCATACATTTGTC	V3
YFR037C	RSC8	GCGCCGTGAATAAATCTACA	ATAGGTGCTCCATCGTCCTG	V3
YDR216W	ADR1	CCTCGTCGATCATGGTCGTG	AAGACTGGTTAATCGGCATT	V3
YJL074C	SMC3	TTTATATGGTGACAGAGCCG	CAGCTATGTAAACTGAGCGA	V3
YNL136W	EAF7	GTGCTCCACAGTAAACAACC	CGCAGTAACGGAATTTAGAC	V3
YOL145C	CTR9	GCCAAAGACAGATGCCATTC	GATGACCAGCCATTACTTTC	V3
YOL021C	DIS3	ACCGTACCCAGAGATAGTAG	AGATAGCACGTCACTACACG	V3
YHR031C	RRM3	CCAGTTAAGATAATCGGAAC	CCGGATTGATAATAGGCTAG	V3
YDR079C-A	TFB5	GGAGGCAGTACACTACCTTC	CCCATGACAGGGTGCTAAAG	V3
YAL011W	SWC3	TAACAGGCCCGCAAGGCTTA	TGGCTAACATTCACGAACAC	V3
YLL026W	HSP104	GAGTTGGGCCCATATCCCTA	GACTACGTTCTATCACTGCT	V3
YLR376C	PSY3	GGACAGCAGATCCACCTAAG	AAGCAGCGATCCTAATCCAG	V3
YLR154C	RNH203	AGACGTGTAGAAGCCCTTAC	ATAATGGCCTTTCAACCCAG	V3
YNR012W	URK1	GATCATGTGCTCTAAGACGG	GAGATTCTTCAACATCAGCC	V3
YDR404C	RPB7	TCGAGCATAGAACGCGAGAC	AAGTACATCGAAGCAGCAGC	V3
YDR155C	CPR1	CAGCGACCGAGATTATGTGC	TGTATCGACCGCCATCTGTG	V3
YPL204W	HRR25	AATTTGTGCGAAGCCGCTCC	AGATGATGCTAACTTACCTC	V3
YBR095C	RXT2	GAGGTAAGCAGATGTCATTC	GGTCCAACATCATGCCAATA	V3
YLR395C	COX8	GCTCCGTTCAAACAGATCAA	CATGTGTAGTAATCGTAGCG	V3
YLR086W	SMC4	AAGATACCGTAACATGCGGC	AGGTACTACATCCACTACAG	V3
YMR106C	YKU80	ACGTACAGTTAAGCGACTAG	ATTGATACCACGCGGAACGA	V3
YAL061W	BDH2	GCCCAGATAGAATTGCATGA	TGGATGCAGAAACGCCCACA	V3
YFR050C	PRE4	GTGCATATAAGACACCGTAC	ACTGAGGAACGAGACGTACT	V3
YKR082W	NUP133	ACCATCTTATGACAGGGCGG	TTACACGTATCAGAGTCGGG	V3
YER116C	SLX8	GCAACTCTTCTGCCAGTATT	TCGTCCATAACAGGCAACTA	V3
YDR075W	PPH3	TGACACTAGCCACATAGGGC	TTAGCGACACCATGCTGTGC	V3
YKL112W	ABF1	AGAGCAGCACCACTATTGGC	ACCCACAATAAAGGTGTTGC	V3
YDL101C	DUN1	CAATAGTTATGCAGGTTCGG	TATTCAGCTCGGGTAATGGA	V3
YDL139C	SCM3	AGATGCTTCACAATTCCCGA	CCTGCGAGAGTTTATAAATG	V3
YOR191W	ULS1	CACTTGACGCAAGGTTTATA	CAGACTTTAGAATGTCCACC	V3
YNL088W	TOP2	CCTAATGCTAGACATTGATC	CAATGGAGTCTAGCTGGCTT	V3
YKL114C	APN1	GGCCCGAGTACGAATAATAC	TGAGGAAGACCATCTGCACC	V3
YML010W	SPT5	TCCTCGGAGCTAGGGCTATT	AAGCAGTTGGAACCACGTCC	V3
YOL090W	MSH2	CGGATCGTAGCATCTCCTGC	GATGAGACAGTTGACGAATC	V3
YDL070W	BDF2	GATTCATCTACATGCTGAGG	ATGATCCCACTAAGTCTTGC	V3
YPR187W	RPO26	AGAGCTTCAACATTGCTGAC	CACACGGGTAGAAGTGAACC	V3
YEL071W	DLD3	GGAGCTATACCACTACTGTC	ATTCACGGACCAGGACGTTC	V3
YDR228C	PCF11	GGCTAAGAACTTCGTACAAT	GGGAAGATACCCTCAACGAC	V3
YLR035C	MLH2	GGGCGTCCAACAATGCACAA	GCACTATGATAATCTCCGTC	V3
YFL014W	HSP12	CCATGTAACTCAAGTCAGAC	GATAGAGCGACCATTCCAGC	V3
YDR532C	KRE28	ACAGGAGTACAACTTCTGGA	AAGGACTGTCAATCATTCCC	V3
YGR099W	TEL2	AGACACGACACACTGGCTTA	GCGGGACACATTGAACACAC	V3
YKL110C	KTI12	AGATTCCTACAAGTCCCTGA	AATACCGTGGCAATCGAGCC	V3
YOR258W	HNT3	CGACTCTAATAGCCGATAAG	CCTGTTAGTTAATGGGCATG	V3
YMR039C	SUB1	TATTGCGCGGGACCTCTGTT	AATTTCGATGAACCGGCGGC	V3
YNL206C	RTT106	CATGCTCACTAATCTGACAG	CCACGGTCGAGACTGATATG	V3
YAL021C	CCR4	TACTGCTCGATAGGTGGATT	ACACCCGTAGAATCAGTGAC	V3
YNL025C	SSN8	AATCTCTTAGAACGGGCACC	AGACTTCACTAACGGGCCAG	V3
YMR176W	ECM5	ATAGCTGAGTAATGGCCTAG	GGCACTACTCAAGCATCTTA	V3
YNL250W	RAD50	AATATGTAGCACACGCCAGC	AGAGCTTAACCACGAGCAGC	V3
YDR207C	UME6	GTCGATCTCAGGGTGATAAT	GCCTGTATAGTAGCGTATGT	V3
YOR209C	NPT1	CACAGAGCGGCAAGGACTTA	AATGCGGGAGTGCCTGACAT	V3
YOL005C	RPB11	CATAGTAGGCAATGCGGTTC	TGTTAAGAACGACGTGCCAC	V3
YOR375C	GDH1	ATTAGAGGCGCAGCACCATG	CTATGAAGGGAATGCACAGC	V3
YDL156W	CMR1	AGATGTAGACCACCGTGTCC	ACATAGCTTGAAGGGTCCTC	V3
YPL122C	TFB2	GACTGCCATAGACTGCATTC	CGGCTCAACATAGGCCAATA	V3
YOR341W	RPA190	GTCAGCCCTAGATGCACTTG	TATTGCGTGACACCTGCTCG	V3
YMR167W	MLH1	TTTACCACCATAGACAGAGC	ATATGAGAGCCACCAGTCGC	V3
YMR005W	TAF4	GCAGCCTAGCTCAGATTATG	GGATGCCACTTCATACACTG	V3
YMR061W	RNA14	CGCCTGAGCTACAAAGATGA	GTGCTCTCAATAAAGCCACA	V3
YGL163C	RAD54	AGTAAGACACCATTCTGTAC	GAGGCACTATAACCATTACC	V3
YNL124W	NAF1	AGAGCACTTTAACCACGGGC	AAACCTCCCTGAACGTGTGC	V3
YJR068W	RFC2	ATGGCGTCTCTCACGTCCGT	AGCCGTATTGTCAGATCGTT	V3
YOR346W	REV1	ATTATAGATGCAGAGGACCG	TGGTCTCCACGATCACTTGG	V3
YIL131C	FKH1	CCACTGTGTAAAGACTCGGA	CCGCGACATTAAGTCAAGAC	V3
YEL032W	MCM3	TATGGCACCACACGAAGGAC	GCCGACGACATAATCTTTAT	V3
YLR005W	SSL1	AGAGCCATTACACTAACTGC	GAAGACCCATGCACTGAATC	V3
YLR095C	IOC2	TACAGACGGACCCAGATGTC	TACTATCCACCATGCTTAGG	V3
YPL254W	HFI1	CTACAGTTGAGAACAGGGAC	AGGAGCACTATATCTCCACC	V3
YPR168W	NUT2	AATCTGGGTGAAGCATTGTC	ACAGTGGCGCAAGGCTCTTA	V3
YKL028W	TFA1	ACACTCGTACCATTGATGCG	CAGTCAGATGGATTAAGTCG	V3
YHR085W	IPI1	CCGATGAAGACAGTAGTGAC	GGCGCTTTATCAATCTAACC	V3
YOL104C	NDJ1	CATTGTAGATCAGTCTGTGG	GGCTCTTCAGCAATCCTATA	V3
YCR042C	TAF2	ACTGGACGGAGCTATATTTG	AGATCGCACTGCCGACGAAT	V3
YPR070W	MED1	AGTAGCCACCTAAGTCATTC	AGTATCCTCACAGGTCTTTC	V3
YDR156W	RPA14	TAGAGAGGATCACACCCAGC	CATATCACTAGACACGATGC	V3
YGR124W	ASN2	CTGAACAGTTAATTCCACGC	CAGTCTGAGTAATCCGTTAG	V3
YDR217C	RAD9	GGATCGCTATAATCTCCTTC	CCCATCCAGGTAACTTAAAG	V3
YDL160C	DHH1	ACATACGGTAAAGCTGTGGA	AATGAGCGTCAAGATTTCCC	V3
YKR017C	HEL1	CGCATTGTGACAGATGTTCG	TTGCATCACGCATGTGGTGC	V3
YDL182W	LYS20	TATCCGTCGGAGCGCGTTTC	AGGTTACCACTACACGAATC	V3
YMR273C	ZDS1	GATCAGCCTTTACATTCCTG	GATGGTCTTCCACCTGTGCT	V3
YDL047W	SIT4	CTGTCATAACGACGGCTAAG	ATTGAAGTACGGCTAAGCAG	V3
YML074C	FPR3	CAATGCACGGTAGAGTATCT	AATACTGCGAAAGCGCGCAA	V3
YER120W	SCS2	TATGCGCTCGGACTCCTTGT	ACCAAGGTATGGCAAGTCGC	V3
YML121W	GTR1	GAGGAGACTGTACTATCATG	ATTAGGTCGCCCAGCTACTG	V3
YLR216C	CPR6	ATTGAGCGACTGACCGCCAT	GATAGCATCCGAGACAGCTC	V3
YHR154W	RTT107	TCGAGTCCGGTCCATGAGTT	AAAGGTCGTTCAATGTTCGT	V3
YJR035W	RAD26	GCGTTACACAGATCATAAGC	AATTAACGACCAGTACGCGC	V3
YOR014W	RTS1	CATATACCGCAATGGAGCTA	ATAGGCTCCCAAGCTGCTAA	V3
YBR115C	LYS2	ACCATCAGCAGATAGACGGA	ATACGGAGCGGACACCTATG	V3
YOR151C	RPB2	AGACTATCTCTAATGACCCG	ATCACTTATCGCAGGTAGGG	V3
YBR195C	MSI1	ATGACGAGCCCATGACCTAG	GTTGAGGCCCTCACCTAACG	V3
YLR135W	SLX4	TACGCGAACCCATTGGTAGC	ACTGCACATAGGGCACAGGC	V3
YMR239C	RNT1	TCTAGTATGACAGAGGGTTC	TATGTTCTGACAGCCTCCGG	V3
YLR418C	CDC73	AATGATGTTGAATGTGCCCG	ATTTGCCGACCCGTACTTGG	V3
YFL029C	CAK1	TATTGGCGCCCAGCACGTAG	TTTGGCGCACTACCATCTGG	V3
YPL240C	HSP82	TCCGATCTTGCATGGTGGCT	CCACTGTTAGCAGATGTTGG	V3
YKR062W	TFA2	TCGCGCTATAAACGAATCCA	TCTGTAATAGGAAGGCAGCC	V3
YPR179C	HDA3	CAGATTCCATAACACGGGAC	GTGCAGACATCTACAGAACC	V3
YBR175W	SWD3	CAGTCATCGTAACCTGATAG	TACATGAAGATAACGAGCGC	V3
YDR098C	GRX3	TAGTGTCCACCATGTCTGGC	ACCTACTGAGGAGACGCATT	V3
YJL006C	CTK2	TAGACGGTCTTGCAGCCTTC	AATTTACAGGAAGGGTCAGC	V3
YER092W	IES5	TGAGGCTACCCACCTATGCG	TAAAGCGTACTTACCAGTCG	V3
YAL038W	CDC19	TTCATCTCGCCATCGGAGTG	TCGAGATCAGAACGGAGCAC	V3
YNL273W	TOF1	TGGCGAGTAATACAGACGAC	CGCCGTTACTCAATGATTAC	V3
YIL084C	SDS3	GATACCAGTCTCACCGATTC	GGATGGCTCACACTTCTTTC	V3
YPR133C	SPN1	GCCCATTTCTAATTCCGTAG	GTATCATATCCATGTCCACG	V3
YOL006C	TOP1	TTATCGACTGCCAGCGACTG	ATATAGCATCGCAGCGCAGG	V3
YDL091C	UBX3	GGCCATAACATGCAAGTGTA	GCCGTTGCCATAATAAGAAC	V3
YKL005C	BYE1	ATCCCATAGGCACTGGCATG	TATCTGTCGCCATGCCTGTA	V3
YDR510W	SMT3	CATCTAAGCTAAGGGAGTTC	CATGAGTTTGAAGTACCTGG	V3
YGR042W	#REF!	GACTCTACGATACGTCGCTG	GACGTATTGGCATAGTTGCT	V3
YCR020W-B	HTL1	ATGTCGCATCAGCCAGTAAG	ACTAATGGCCTGGAATGCAA	V3
YER148W	SPT15	AACAGCCCTGCAATGGTTTA	GAATAGGAACCACGCTGCAC	V3
YDR502C	SAM2	AGACGTAGCGAACTAGACCC	AAGGACCTCTAAGTCGATAG	V3
YMR117C	SPC24	AGATTGCATGAACCGCCAGC	CCCAAATGAAGAGTCGATGC	V3
YDR026C	NSI1	CAGATGAGTACAGAGGATTC	CATGCTGCAACATCGCGTTA	V3
YIL061C	SNP1	ACGGCGACGAGATACTCATG	AACGAGATAGTGACGTACTG	V3
YBL035C	POL12	TATTGCGCTCCAGCTCGGAT	CAGCGCGTACTAGACTGGAT	V3
YBR081C	SPT7	ACCTAGATAGCTGTAGCCAT	GCGCATGAGACATTTACATC	V3
YIL112W	HOS4	CCGAGATGGTAATTCATGTC	CATGCAACGAACCTAGTCAA	V3
YGL202W	ARO8	CATAATGTCCAAGCACGCTA	GCGCAGATATAATTCACGAC	V3
YOR243C	PUS7	TAGTACCCGGAACCTAGGGC	ACATAGGTAACAGGAGTCGC	V3
YPR161C	SGV1	TAACTGCCGCGAGTCGTCTT	ATATACGGGTAACCAGCCGC	V3
YNL007C	SIS1	ATCGCAGTGAGCATCATCGG	AAACGATACGGATTCATGGG	V3
YPL022W	RAD1	CCATTTGATACACTCTGGGC	ACGATCCATAGACACATTGC	V3
YNL118C	DCP2	TCGCGGACCAGATTACTTAG	ATGACAGGCTTTGAACGACG	V3
YPL235W	RVB2	ATATCGAGTGCGACATCCCG	GATACGCTCGCATACCTTGG	V3
YPL126W	NAN1	TGAACCATTCTCAGACATGC	CCAGCGAATGTCGATCAATC	V3
YPL139C	UME1	GACAAGGCTCCAGGTACTTG	CCCGGAGATGTTATGAAAAT	V3
YHR197W	RIX1	AGATAATGGAGATGCGCCTT	CAATGATAGCGCAGATTTGG	V3
YDL126C	CDC48	TAGTAATCGACAGTGAGGTC	TATCCTACCGCATCGTGAGG	V3
YMR236W	TAF9	CCAGTACGCCCAATGAAATA	CAGTCGGTAGAACTATGTAC	V3
YBR160W	CDC28	CGCGCCATACGCTAAATATA	AAGCGCCACTTTGCTCAATG	V3
YER089C	PTC2	CACTGTAGGTTAATCTAGGG	TCAGATTTGCTAAGGACTGG	V3
YMR182C	RGM1	TCCATACCGATAAAGTTCGA	TACCATGAGGGAAGATTAGC	V3
YNL085W	MKT1	CAGTTATTACCAGATAGGCG	CCTAAGATGTTGTAACCTCG	V3
YOL094C	RFC4	CATAGCGTGGAATCTACCTC	CCGAGGCATAAACATCTTGA	V3
YLR134W	PDC5	CTCAGTACAGCGGATCACAG	GTGGGCATACAACACCAGCA	V3
YBR049C	REB1	ACACCGTATTTAAGACTGCC	ATTCCAGGCATCCAGAGTCG	V3
YKL214C	YRA2	TGGGCAGACACAACGCTACA	ATAGGTATCGCACGCTCCTG	V3
YER142C	MAG1	TAGCTGCTGGAATGCTTGTC	CAGGACCAGTGTAATTGTTT	V3
YCL040W	GLK1	ATTTCACTCACCTACATTGG	ATCGCAACTAACGCGCTATA	V3
YFR013W	IOC3	GCGATCAGAACAGATGCCGA	AAGTAGCGATCATAACGCCG	V3
YPL194W	DDC1	CACCGTCACTAAGTAGATTC	CGCATGTTCTGAAGAGTTTC	V3
YDR289C	RTT103	GGCCAGTCTCGCATGATTTG	ACGTCAGGTGTGTAACGAAT	V3
YBR089C-A	NHP6B	TATGACCCCGCAGTGCATGC	GTATGCCCGATCATCCTGTG	V3
YKL074C	MUD2	CCTCTGATATAATCGGGTTC	CCACTCTGTTAAGTTGCTGG	V3
YDL116W	NUP84	ACACCAGGGAAGGGCTTCAC	AGCTAAGACCGAGTAACCTC	V3
YOR279C	RFM1	CATCTAGTGAAAGTCAGGCA	CGCATGTTGAAATATGGCAA	V3
YFL017W-A	SMX2	GCTCAGTACCTATATCCTTA	GAGGTAGTTGCATCTCTAGT	V3
YDR469W	SDC1	AATAGCTGCTCAAGGCCAGC	AGACGATCACCATTCGATGC	V3
YDL076C	RXT3	TGGCCGAGATATGTAGAAAC	CCTCAGGAAGGAGAAGTCAC	V3
YPL181W	CTI6	CCGATGTATGAACAGTTTCC	AATACCCGGCGAATGTACGC	V3
YER022W	SRB4	CCATAGCACCAAGATTGTGA	ATACGTCATCTCACGAGCTG	V3
YDL164C	CDC9	AGAGTCCTGCCATCTCGGAT	CGTAGCATATCATCCTGGAT	V3
YOL135C	MED7	TGTACGCCCGTGAGTTTCTT	AAGAGGTAGTAACACTCCGC	V3
YMR053C	STB2	TCCAGAGTTAGGAAGTAAGC	TGAGGATAAAGAACTCGCGC	V3
YGL090W	LIF1	TGAATGCGCGTGAAGCACTC	CCCATAATGACAAGTCTCGA	V3
YOR179C	SYC1	TATACACGGGAAGCACGAGC	AGATTCACACCATGAGTCGC	V3
YEL019C	MMS21	CATCGGCATGGAGCTTAGAT	GCCAGATACTTGAATCACTC	V3
YPL138C	SPP1	AAGACGACGTAAGCCCATGC	AGGAGACGTTGATAACTCAG	V3
YJR082C	EAF6	GGCAGACACGTCAAGCATAC	CGCCGAATTACCAATGATGA	V3
YDR419W	RAD30	AATTATCGGTGACGAGCGTC	AGTATCTGGCGATTCCGGTT	V3
YPR019W	MCM4	AGGACACGACGAATCTCGAC	CGCTCCTAAGACATTGTTAC	V3
YDL105W	NSE4	TGCTCCCGGCAAGAGAAACA	TAGCAACAACCAGTTCTGAC	V3
YJR140C	HIR3	TACACGCTCACAGGTACTAG	TACATTTGCCCATTGGCTGG	V3
YDR191W	HST4	AAGTACAGTTTAGACCAGGG	TTCCACTGGTCAGCAGATGG	V3
YHR118C	ORC6	TCCCTTCAGATAAAGAGGCA	TGCAATTATGGGCAAAGGCC	V3
YOR298C-A	MBF1	TCATTCGGTGAAGTTGCGTC	TATTACTGCCCAGGCTGAGG	V3
YDR363W-A	SEM1	TTGCATTCGGTTAAGACGGG	TAGGTATTAGCAGATCTGGA	V3
YLR113W	HOG1	TAATAGCGGCTTAACCGGCG	CCGTTATTTCTAAGACCTCG	V3
YPL184C	MRN1	CAGCTACTGGAATAGTTTGC	CACGACGCTAAATGTCTTCA	V3
YPL061W	ALD6	CGATATGCAGAATAGCGCAA	CATACCGATTCACGTTGATG	V3
YHR090C	YNG2	GTACTATCCACAGTCCTGCG	ATTATTCGCGCCACGAGTCG	V3
YDL084W	SUB2	GGCTACACGAAATCGCTACA	ATTGCATAAGCAGAGTCCTG	V3
YHR077C	NMD2	CCGAGTTATTGACATGAGTG	CAGATTGCAGAAGGACGCAC	V3
YKL113C	RAD27	ACTTGTTAGACATTGGTGCG	AGACCTCTAGCAGTACGTCG	V3
YOL004W	SIN3	GCATGTCCTAAAGCTGCCGA	CATATAGGAGCAGTACGCCG	V3
YCL061C	MRC1	TCACGCGATGCAGTCGGTAT	ATCCAGATTCGACGATATTG	V3
YPL128C	TBF1	CTAGCAAAGACAGGGTTGTA	CTAAGGGACTGCAACGGAAC	V3
YDR176W	NGG1	CCTTTATTACGATGGAGGTG	ATGACGTTTCCCACGCTGTG	V3
YGL173C	XRN1	CACGATTCAGTATCAGTTCG	ACAGATCGCTGAACTGGTGC	V3
YJL090C	DPB11	GAATCAGGTTTGGCAATCTC	GAGCCGTGTCCATCTTATCT	V3
YDL201W	TRM8	CCATGAGTCACAATGAGGCA	GCTGCACATCAATCAACGGA	V3
YAR003W	SWD1	AGAGAGGACCCACACTACTC	GCGCAGCTACAATTACTTCA	V3
YCL016C	DCC1	CGCACAGTGTTTCAAGATGC	TCACATGAGCCGAAGGATGC	V3
YLR117C	CLF1	GCGCTATGACTATTCACTCT	AATTCTGGTGCAGCCGCTCT	V3
YPL129W	TAF14	GCGCTATGACTATTCACCCT	AATTCTGGTGCAGCCGCTCT	V3
YBL093C	ROX3	ATCACATAGAGAGACGCTGC	CACAGCGACGAACGTGATAC	V3
YEL061C	CIN8	CGCGGTATTAGGACATATAG	TAAAGGCATGTTCAGCAACG	V3
YDR295C	HDA2	ATTGACTGACGCCATGACCG	TCGAGTACGAGCATTCGGCG	V3
YAL019W	FUN30	CCAGGATGATGAATACGAGC	TTAGGTACACTACACGTCGC	V3
YPL015C	HST2	AAGTAGACTGAACTCCGCGC	AGTTATACCAGCCGACATTC	V3
YBR057C	MUM2	GAGCCTTGCACCTATGCTAT	CAGGGCAGCGCAGTTTCTAT	V3
YMR275C	BUL1	AGAGGAACCCACGGCCTTTA	CATAGTAGAACAGTTGGCAC	V3
YKL032C	IXR1	TTACAGCAGCGCAGCTTAGC	TAAATCCCTTTCAAGCAGGC	V3
YNL112W	DBP2	TAGTGGCTACCAGATCACCG	TTTACCGCGAGACGCTCATG	V3
YGR056W	RSC1	ATTGTGCATCCGGGACCACT	ATACAGGTTGCACGGTAGTA	V3
YOL147C	PEX11	GGGCTAAGTATAATCTATGC	TGTTATACACGCCCAGATCA	V1
YML009C	MRPL39	TACTGGATCGCATCGTAGTG	TCTCAGGCTGCATTAGCGTG	V1
YLR193C	UPS1	GCACGAGTTAGAACACGGAC	TGAACCACAGTGTTGAAACC	V1
YIL149C	MLP2	TGAACGGACCTGAATCCTGC	GTTAGAGCACCGGACACATC	V1
YCL027C-A	#N/A	TAAGTCGAGATAATCGCTCC	TTGTTGCCACGCTATCCAGG	V1
YGL017W	ATE1	TACTCTTGAGCACGGGGCTG	TATGTTTCCACCTGACACTG	V1
YGR183C	QCR9	ATTATCATCCGCCAGACGGG	ACTATTCTTAGAGGAGCTGG	V1
YAL008W	FUN14	GTCCGCAGGATGAACTATAC	GCTACTTTAGAAGACTCACC	V1
YER001W	MNN1	CAGGCGTCAGTAGTATTCAT	GCGCTAATATCACATAGCCC	V1
YLR149C	#REF!	CCGACCAGAGTTAGTAATTC	CCGAGCTGACTAACGATTTC	V1
YNL047C	SLM2	CCATGTGTTTAAGCTGAGTG	ATACTGGCAGAAGTCCGCAC	V1
YKL197C	PEX1	TACGAATAAACAGGTGTGCG	ATAGACTGCTACCAGCGTCG	V1
YKR070W	#REF!	AGGTCCTCCACATTTGATTC	TAGAGCGTAAGAGCTGTTTC	V1
YGR106C	VOA1	CCCGCTAATCTTGTAGAATC	CACTACTATGTGGTAAGAGG	V1
YGR084C	MRP13	TACGAACACCGTCGCAATTA	GGCGGCTAGAGAACCATAAC	V1
YJR094W-A	RPL43B	GCGCATTAAGTCCATTGAAG	AAGCTACCAGCCCATTACAG	V1
YGL226C-A	OST5	ACCCTAGCGGCTTGATGTGC	ATTATTGAGCCCGCGCTGTG	V1
YOR289W	#REF!	GCGGTCAGATTTCAGGCAAA	GTCACTCGTGTCCAGGATGT	V1
YDR373W	FRQ1	CCATGCGATGAAGCTGTTGC	GCCTGATGCACAATAGACCA	V1
YGR271W	SLH1	TGAGGAACACGGTGCAATAC	AGATGTACGTCAATTCCACC	V1
YNL227C	JJJ1	GGAGTCCATCCATAGCAGTC	GAGTTTCACGCATGACTATG	V1
YGL159W	#REF!	ACACTTCCTGAACATTGGGC	AATACGAGCTAAGTGGCCAG	V1
YER124C	DSE1	GCCTGATGATTAGTGACTCT	CCCGCATCAATGAAATGGCA	V1
YLR295C	ATP14	CGAAGCTCGTTTAATCGGTG	ATTTCTCAGACCCGCGTGTG	V1
YNL142W	MEP2	GCGCATAGACGAGCATAAGC	AGTCGCGCTGTCCATTTGCT	V1
YDR262W	#REF!	CGGAATCTATTTCAATGCGC	CATAGATGCTGAGCTGCTGT	V1
YBL107C	MIC23	ATCATCCGGTCATGCCGAGT	ATGGCTCCAGTTCCAGCTTG	V1
YKL116C	PRR1	GAAGCACTTTCAAGCCGAGC	GATCACCAAAGAAGCGTCGC	V1
YDR091C	RLI1	CTCTAATCGGCAGTCAGGTG	AGACCCATGTTCGGCAATGC	V1
YGL195W	GCN1	AAGCGGACTGAACTTTCTGC	ACCTGTAGAGTAAGTGTCAG	V1
YDL207W	GLE1	CATCAGTCTGGATAAGCTAG	CCTCGTAATCTAGCTTAACG	V1
YBR200W	BEM1	CACTTGTAGCCAGGTATCGG	CCTTCGTTAAGATGTATGGG	V1
YDR032C	PST2	GGAACTCTCTTCCATATGGC	CCCTAATGATACAGACTTGC	V1
YGR020C	VMA7	TGAAGAGGCACCGAACCTAC	AGCACACCGTTGAATTGACC	V1
YHR192W	LNP1	CCGAGACTTAAATGGATCGA	CTGTCGCACGAAGGAGAAAC	V1
YKR068C	BET3	ATCAGTTGTCTAATGCGTGG	CTAAGGGCTGTTAATCTTGG	V1
YDR389W	SAC7	AGTACACTTGAACTCCATGC	CGCTATAACGTATCCGATCA	V1
YER073W	ALD5	CCTGCGTGCAAATCTAACAA	TGTACCGGCATCACCTTTGG	V1
YML125C	PGA3	TCCCAGGAGATAAAGCCTCA	TATTGTCGAACATGGGTGCC	V1
YMR313C	TGL3	CGAATTAACCGCAACTGCTA	CATACTTACGAAGCTGTACC	V1
YJR062C	NTA1	CTCATAGTTGGTAATACGGG	CATACGTCACGACTAGCTGA	V1
YML016C	PPZ1	TACCTATTGACCAGTGGGCG	GTAGATGCTATCCCAGCTCG	V1
YAL007C	ERP2	AGCACCTGACGCATCATAGG	TACCATGCTGAAGGAGTTGC	V1
YNR009W	NRM1	GGCCTAAGAACAGACTCTCA	AGCAGTGATTCATGCCTCGT	V1
YGL032C	AGA2	TCCATCAGAAGACAGTGTGA	CTACTGGACGTGAGCTGACT	V1
YGR108W	CLB1	ATACCTGAGCCAGAGTTGCG	GATACCATAGCATTAGGTCG	V1
YGR083C	GCD2	GCCTAGCTGGCATTCTTCAT	GATCACTACACAGTATGTCC	V1
YLR056W	ERG3	ACCCAGCATATAAGGTCATC	ATAGGGACTACAGCTCGCTC	V1
YKL194C	MST1	CCGGGAGCTTAATATACATC	CCTATCCGTACATATCGAGG	V1
YEL017C-A	PMP2	ACATCGGGTAAACGCCTCGA	AAACTGGTCTGAACGTCCTC	V1
YJL094C	KHA1	TACATACCACGACCTTGAAG	CAGGATAGATCAGCTTACAG	V1
YDR140W	MTQ2	CTGATTCCACGAGGTATGTG	CTCACGAGTAGTCATGGGAT	V1
YGL020C	GET1	AACTGAACATACCCGGTGAC	ACACCCGGATAATGTCTTTC	V1
YPR113W	PIS1	AATAGGCCGTCAAGTTGCCC	ATAGCGCCGTAACCGTCTAG	V1
YNL130C	CPT1	TCATGTATGGAATGCGTTGC	GTGTCAAGCACAAGGCACCA	V1
YAL029C	MYO4	CAGATCCATGAATCAGATGC	CATGCTAAGCGATATGGCAG	V1
YNR026C	SEC12	AAGATGGCCCAATGTGTTGA	TCATCATCGTGCAGAGGCTG	V1
YLR143W	DPH6	ATCCATAAGGTCGGGCAAGC	TCAGAGTCCTGAACAGCCGC	V1
YGL005C	COG7	ACCACTTCGCTTGAATGACG	AGAACAAGACCATCGCTCGG	V1
YOR105W	#REF!	TGTGAAGCACCAACACGGCA	CCTCACGATAAAGTATGGCA	V1
YML086C	ALO1	ATTGTAGCGCCATAGCCTCG	AGAAGACGCTCTCAATCTGC	V1
YGR193C	PDX1	TTGAGATTCACCAGACCAGC	CATGAAATAACAGGTGGCGC	V1
YPL239W	YAR1	AATTTCCGCGAAGCGTGAGC	ATGGAGACCCTAGACACGTC	V1
YLR099W-A	MIM2	TGTCACGACCACAAAGGAGC	ATTAAGCGCACAGAGGTCGC	V1
YDL157C	#REF!	GCACTCGACTCATTTACATG	GGCGTCACATATACAAATGA	V1
YGR032W	GSC2	ATCAGCCTGTCATGGTCCGT	CGTGCTCATATAGCTCGCGT	V1
YMR020W	FMS1	ATTGGTCACCTAGCACTCGG	TCATAGATGTCAGCACTGGG	V1
YMR019W	STB4	CACGAGAACCACGATCTTTA	AGTACACGCGCAGAATGCAC	V1
YOR152C	#REF!	TCAGCTCGGTAACTTGCACG	TCCTTACAGTGGATGGAATG	V1
YPL097W	MSY1	GGTTCTACACACCATAATGA	CACCTTTCGAGAGGACGATG	V1
YNL009W	IDP3	TATGCACTCAGACCTATTTG	GACCTACGATTGTGACGAAT	V1
YPL259C	APM1	TACATGGCACTAAGGGTCAG	CATCCGTGAAATTTCCTGGG	V1
YJL034W	KAR2	CGCTGAGACAAAGATTTCCA	TGACCGAGTCTCACGTTTGG	V1
YML004C	GLO1	ATAGACTAGCGCACTCAGGG	TTGCTCGCTACACTGGATGG	V1
YIL076W	SEC28	GCCATTTCTTCAATAGCTGC	ACGACGACGTTAATCACATC	V1
YML005W	TRM12	CAAGGACCCGCAAGTGTCTA	CACAGTAATGAACCGTTGCC	V1
YLR091W	GEP5	AGATTGAGACCACTAGCTCC	ATGCCAGACTCACTGTTCAT	V1
YNR007C	ATG3	ACGATGCAGGGATGCCATAT	GAGTAGCTCACTCCACATTA	V1
YKL191W	DPH2	AAACTACGTGGCTAATGGCG	ATTTGGCATCCAGTCGCTCG	V1
YER018C	SPC25	GCCCACGAGCAATTTATTCA	ATCTAGGGGCGATATAGCTG	V1
YDR128W	MTC5	AATTCTCTGTAAGCGCGGCG	ACCTTATACCGATAGCGATA	V1
YAR028W	#REF!	GAGATGATGCTACCCAGCCG	CATCGACCAAGATATTTCGA	V1
YKR001C	VPS1	GCATCAGTTTAATGAGTGCG	GTAGCACCTTCTTAACGTCG	V1
YOL103W	ITR2	AGATGGCACTCACGTCACTG	ATATACACGCGAGAGCCAGG	V1
YIL124W	AYR1	AAAGTCACCTGCACGTTGCG	AAACTATCATTACCCGGTCG	V1
YMR192W	GYL1	TCACAGGCTTGCGCACATTC	GACCGGGTAACACGTATTTC	V1
YCL008C	STP22	CCGGCACATTAGTCAAATAC	TGGATAGCAGACAGCACACC	V1
YNL190W	#REF!	AGCGCAGGCCAATGGTTATA	AGGAGAGTCTCATATTCGCC	V1
YMR086W	SEG1	CAGGTCTAGGAATCTTTAGC	CAACGATACCGAGCCATTAG	V1
YDR047W	HEM12	CTCTGATGACGATGTAGGAT	TCATAGGTCGTGACATGGAT	V1
YJL025W	RRN7	GATCTAGTTACAGGACGTGC	GCGATGGAGCGACTTTCTCT	V1
YKR081C	RPF2	GGCACACATTATTCGCAAAC	GCCGAAGCAGACTTAATCAC	V1
YIL048W	NEO1	TCACACTGCGGAATTAGCGC	AGGCTTCAGCGATTGTATGT	V1
YGR085C	RPL11B	AGCACACTATGACCAGGCAG	CCTCTGTACTAATGATGCAG	V1
YPR081C	GRS2	CCTGTAGACAAATGACGGCA	CAAGACCTGACAATCGCGGA	V1
YDL230W	PTP1	ATACTACGCGCAGATAGCGG	AAGCATTGCGAATCATAGCC	V1
YIL009W	FAA3	TACACACCTAGGAACTCAGC	TATGGGTGACCTAACCTCGC	V1
YLR326W	#REF!	GGCACATCGCAAGATATCGA	ATGACTCAGGCGTAGCCATG	V1
YJR016C	ILV3	AAGGCATTCGCAGCTTATAG	CGAGTTAATCTCAGCGAACG	V1
YMR134W	ERG29	CATGGGCACGAATATCATAC	CATGGGCTTAAACCTGATGA	V1
YDL010W	GRX6	CATCAGTAGTAACAGGGAGC	ACGACAGTAACATCATTCGC	V1
YOR196C	LIP5	AGGCGCTTAGTAGATCGTAT	ATCCCTATGTGACGGAGAGT	V1
YBR024W	SCO2	GCCACTTGGATAAGAGCTAG	AGCTACGCGCTTTGAACACG	V1
YBL017C	PEP1	GGCCTCTCGTGCCATGTATT	TCTAAGTAGCAAGCACCCTA	V1
YBR179C	FZO1	TGGATAATACCCTTCAACGC	CTATTTAGTCGAATGGAGGC	V1
YAL039C	CYC3	TACTACTCACGATGACTCGG	CATTGGCGTACACTACTGGG	V1
YFR002W	NIC96	TATTTGCTACCAGGCGCACG	TCTGCACCGCCAGTTATTGG	V1
YIL172C	IMA3	GCACCTTCATCATGTCAGTG	AATCACGCTTGGTAAGTTGG	V1
YMR083W	ADH3	CATATTCGATTAAGGGTCGG	GTCACTACTGGAGCATTGGG	V1
YHL017W	#REF!	TGTACCGACACGCTCAGAAG	TTACATAGTACACTGCGCGG	V1
YGL134W	PCL10	ACATACTACTTAGGAGAGGG	TATCTACCGCCACGTATGGA	V1
YDR232W	HEM1	ATAGCGGACCACATTGCTGC	CCGTCGTATGAATCTACATC	V1
YGR105W	VMA21	TAAGAGTTCAGACCACCTGC	TGACCGCTGACATTTCGTCG	V1
YJR161C	COS5	ATGATCTCGCCAACGGGCTA	TCAGTTCAGCGCAGTCCATG	V1
YFL004W	VTC2	TAGTACGGGTCAGTCTCTGT	AATACCTGGTCAAGAGGGCC	V1
YDR434W	GPI17	TGATACTGCCCATACTGGCG	AGGCACCTACGATATGCTCG	V1
YIL106W	MOB1	CGCACGATACACGTACTTTA	TATGGGACCCTATGCCACTG	V1
YJL024C	APS3	ACACGGATCACATCGTAGTC	GCGTGCAGCAAACTCTACAA	V1
YMR157C	AIM36	GGTACAGACACTGCGACAAC	TGGTAGAACCGAACCCAGAC	V1
YER151C	UBP3	TGCACGAGTCTCCAGTGTTG	ATTGGTCATACAGCGCCAGG	V1
YJL151C	SNA3	CTACGCTAATACCTAGTCAG	CCTACCGTCAGGATATTATG	V1
YML110C	COQ5	GAGCCCAGTTAATCCCATTC	ACCGAGACGGACGTACTTTC	V1
YBR161W	CSH1	CGATACTCATCAATGCAGAC	CATTGACGAGAATCCTAGAC	V1
YPL066W	RGL1	GATGGACCTCCTAACTCTAG	TTGCCAGCATTCAGGACACG	V1
YDR034W-B	#REF!	GGCCACAGGATCTAAATACC	GCTTTAACATAAGGCACACA	V1
YIL027C	EMC5	TTACAGCCACGAGATCGCAG	GATCAGCGACTATCATGGCG	V1
YIL066C	RNR3	CACAGGAGGTAACACTTTGC	TGCTCATTATTCCTAAGAGG	V1
YGL107C	RMD9	GATAGTAGCCTCACGACCTG	GCGCGTAGATGACTTTAGCT	V1
YAL026C	DRS2	ACCTGTTCTAAACCAGTGGA	ATTGACCGACCAGGTTCGTC	V1
YJR044C	VPS55	AATGCTCGGGAAGGCTACTC	AGAGACTACCTACCAGCTAG	V1
YDR175C	RSM24	TCCTAGCGCGTGCGATCTTT	AGACTGTACGAACTGCGACC	V1
YHL038C	CBP2	GCACTAGACGAACTGACTAC	GACCAGGGTGTGCAATTATC	V1
YDR384C	ATO3	CCGTACATGCAATCAAGCTA	GACATAGATCCAATCCGCTA	V1
YLR431C	ATG23	GAGTGATAGCCCTCCACAAC	GATGCGTACCTCTTCCATGT	V1
YMR089C	YTA12	ATACGACTTCAAGGGACGCC	AGTTCATACCCACTTCGTAG	V1
YHR037W	PUT2	AGAGCTTGTCAACCTAGCGC	AGCTACGTCTCACTCTATGT	V1
YPL231W	FAS2	CATCTTGCGCGATAGGCTGT	CACCGTAGGCACATTGATTC	V1
YGR191W	HIP1	AGGAGGAACTTATGTCAAGC	AGATGGCCCTAATTGTCCGC	V1
YCL014W	BUD3	CCGTAGCATAAAGAGCGGCA	CAGCATTGTAAATAGGCGGA	V1
YFR024C	#N/A	CCTATGTGTAGACAGAGTAG	TGAGTACACATCACATAGCC	V1
YGL095C	VPS45	CAGGACAGGCGATCCGATAT	CGATATACGTGCAGACTATG	V1
YIL089W	#REF!	GCCGCGTAGACAATAGATCA	TCATCGCTTGCACGGTGAGT	V1
YOR267C	HRK1	TTATGACTCAGCAGCGAGCG	AAATTGCGATCAAGGCTCAC	V1
YIL016W	SNL1	AATGCACGGGCACCCTGTAT	AATCATCCCTGGAGCGGAGT	V1
YKR046C	PET10	CACAGTCATTAAGAGGCTAG	TATTCAGGCACAGACACACG	V1
YOR241W	MET7	GATAGTAGGCTGACTCACTT	TATGGGTCAACACATCCCTA	V1
YDR391C	#REF!	ATAACCATTTCGCAGAACGC	CGCTTGACACAGAAATAGGC	V1
YBR138C	#REF!	ATACTTGGGTGCAGCTACGT	ATATTCGCGTCGAGTGAGTT	V1
YOR242C	SSP2	ATACAGTAGACAGATGTGGC	CTAAGCGCATTGAAGGTTGC	V1
YJL133W	MRS3	ATACCCTGGGAAGCAGATGC	ATTGCACAGCAGCCGGAATC	V1
YAL035W	FUN12	AGGACCACCTGAAGTTTGCC	ATAGGACACGTAATCCCATC	V1
YJR014W	TMA22	TATAGAAACGAAGCTCTGGC	TATTTCGCACGGAGCACTCG	V1
YNR051C	BRE5	CACGAATCGGAATTGACGTA	CGTGGCGATAATACGAAAGC	V1
YKR026C	GCN3	CCATCTGATTCAATATCGGC	CTATCTGGGCTCAGGATGCT	V1
YJR011C	#REF!	GGTGCCACTTACAAACAACC	TTCGGGAAGACCAGACAGAC	V1
YPL220W	RPL1A	TTGGCGCATCGCTAGTCACT	CGCATGGTATCTAAGACTAG	V1
YPR029C	APL4	TATCCTCTAGCACTGCGTGG	CGCCGCGAAGGCAAGATATA	V1
YER024W	YAT2	GCCTAAGACAGGTGGACAAC	TTGTCACTAACACCAGAGAC	V1
YCR067C	SED4	AAATGATGCTCAAGACTCCC	CGCGGCTACACATATTTACA	V1
YBR254C	TRS20	CCCGTGAATATAAGTGAAGC	CCTGGATTTGAAGCGTATAG	V1
YDL088C	ASM4	TTCATCGCGCTCATGTGGTG	AACAGCCCGGCATTCTTGTG	V1
YPR127W	#REF!	ATGTGATTCCCACTCAGGCG	ACACGTCTGACAGTTGCATG	V1
YJL144W	#REF!	AGAACGTAGCCCAAGGTTGA	ACACGGCTTGAACGTAGGTC	V1
YOR089C	VPS21	GCGCTCACAGTTATACTAAG	TATAGCCTCACATTTGCCAG	V1
YNR027W	BUD17	TGAGCCTTCTCCATAGCGTT	AAACTTCACGAACTGCTTAC	V1
YBL029C-A	#REF!	GAGACTCGCTGCATTGCCAT	GCAGCATATACATTCAGCTC	V1
YER047C	SAP1	ACGAGACCATAAGTTCTTCC	CGGAGAGACAGATTACACGC	V1
YIL138C	TPM2	TATATTCTGCCACAGCGGCG	GCAGCTACTATACGTCATGA	V1
YML020W	#REF!	CATCTGATAGCATTGCGGTG	CCGACTGATGAATCTAATGC	V1
YKL073W	LHS1	GCACCTCACCAATGATAGGA	CAATGTATGACAACGGCGGA	V1
YHR062C	RPP1	CTCGGATAGTGCATGATATG	TATACTGCGCGACATGCGAG	V1
YDR473C	PRP3	CTGGCATAACTCATAAGAGC	TATTAGCACCCGGAAGTCGC	V1
YOR252W	TMA16	ATGCCACGAGGATGCACTAG	TTCGTACAGAGTCAGGAACG	V1
YPR100W	MRPL51	CTCGAAGCGTGGTCAATAGC	CTTACAATGGGCTGCAAGGC	V1
YOL019W	#REF!	GGAGCACTCACACATAGTAC	GCGCCTAGTATTAAAGTACC	V1
YIR011C	STS1	GGAATCTCTTGAAATGCTAG	TGGAGCTGCATCTACACACG	V1
YHR122W	CIA2	GGGCATCATTTACACCTCGG	ATTCTTGACCGATAGCTGGG	V1
YNL189W	SRP1	TACCTAACGACATTTGTGGC	ATGCGGAAGTACCTTGTTGC	V1
YKL051W	SFK1	CATCTAGGTCCAGGCGTCAC	AATGCCCAGTTCCACGTTGG	V1
YML091C	RPM2	ACGCACTGACGATCATTCGG	ACGCCAGTTAGTTCAAATGG	V1
YMR200W	ROT1	CAACATAGATGCCGGAAGTG	CTCACTGATGGGTAAGTATG	V1
YCL049C	#REF!	TTCACCGAGACAAGGCGAGA	TGTTAGACACCCGTGCAAGC	V1
YOL087C	DUF1	TTGTAGTCCCCATCTCGGGC	TATATGTTGCCACCGTCGCG	V1
YDR342C	HXT7	AATAGTGTGCAACTCTGCCC	AAGCTGGTACAATCGTGTGA	V1
YLR462W	#REF!	GATCGGCATCTAGCTTGACT	GCACGCTGCATACATTTGTC	V1
YDR358W	GGA1	GCGCCGTGAATAAATCTACA	ATAGGTGCTCCATCGTCCTG	V1
YDL135C	RDI1	CCTCGTCGATCATGGTCGTG	AAGACTGGTTAATCGGCATT	V1
YBR007C	DSF2	TTTATATGGTGACAGAGCCG	CAGCTATGTAAACTGAGCGA	V1
YOR109W	INP53	GTGCTCCACAGTAAACAACC	CGCAGTAACGGAATTTAGAC	V1
YML128C	MSC1	GCCAAAGACAGATGCCATTC	GATGACCAGCCATTACTTTC	V1
YKR088C	TVP38	ACCGTACCCAGAGATAGTAG	AGATAGCACGTCACTACACG	V1
YDR405W	MRP20	CCAGTTAAGATAATCGGAAC	CCGGATTGATAATAGGCTAG	V1
YIL125W	KGD1	GGAGGCAGTACACTACCTTC	CCCATGACAGGGTGCTAAAG	V1
YIL108W	#REF!	TAACAGGCCCGCAAGGCTTA	TGGCTAACATTCACGAACAC	V1
YLR206W	ENT2	GAGTTGGGCCCATATCCCTA	GACTACGTTCTATCACTGCT	V1
YDL089W	NUR1	GGACAGCAGATCCACCTAAG	AAGCAGCGATCCTAATCCAG	V1
YPL069C	BTS1	AGACGTGTAGAAGCCCTTAC	ATAATGGCCTTTCAACCCAG	V1
YOL059W	GPD2	GATCATGTGCTCTAAGACGG	GAGATTCTTCAACATCAGCC	V1
YOR018W	ROD1	TCGAGCATAGAACGCGAGAC	AAGTACATCGAAGCAGCAGC	V1
YPR172W	#REF!	CAGCGACCGAGATTATGTGC	TGTATCGACCGCCATCTGTG	V1
YHR144C	DCD1	AATTTGTGCGAAGCCGCTCC	AGATGATGCTAACTTACCTC	V1
YOR322C	LDB19	GAGGTAAGCAGATGTCATTC	GGTCCAACATCATGCCAATA	V1
YDR393W	SHE9	GCTCCGTTCAAACAGATCAA	CATGTGTAGTAATCGTAGCG	V1
YOR165W	SEY1	AAGATACCGTAACATGCGGC	AGGTACTACATCCACTACAG	V1
YLL012W	YEH1	ACGTACAGTTAAGCGACTAG	ATTGATACCACGCGGAACGA	V1
YHR025W	THR1	GCCCAGATAGAATTGCATGA	TGGATGCAGAAACGCCCACA	V1
YBL047C	EDE1	GTGCATATAAGACACCGTAC	ACTGAGGAACGAGACGTACT	V1
YGR021W	#REF!	ACCATCTTATGACAGGGCGG	TTACACGTATCAGAGTCGGG	V1
YMR170C	ALD2	GCAACTCTTCTGCCAGTATT	TCGTCCATAACAGGCAACTA	V1
YHL018W	#REF!	TGACACTAGCCACATAGGGC	TTAGCGACACCATGCTGTGC	V1
YBL084C	CDC27	AGAGCAGCACCACTATTGGC	ACCCACAATAAAGGTGTTGC	V1
YMR177W	MMT1	CAATAGTTATGCAGGTTCGG	TATTCAGCTCGGGTAATGGA	V1
YDR027C	VPS54	AGATGCTTCACAATTCCCGA	CCTGCGAGAGTTTATAAATG	V1
YDL006W	PTC1	CACTTGACGCAAGGTTTATA	CAGACTTTAGAATGTCCACC	V1
YPL226W	NEW1	CCTAATGCTAGACATTGATC	CAATGGAGTCTAGCTGGCTT	V1
YKL179C	COY1	GGCCCGAGTACGAATAATAC	TGAGGAAGACCATCTGCACC	V1
YNL119W	NCS2	TCCTCGGAGCTAGGGCTATT	AAGCAGTTGGAACCACGTCC	V1
YHR073W	OSH3	CGGATCGTAGCATCTCCTGC	GATGAGACAGTTGACGAATC	V1
YER042W	MXR1	GATTCATCTACATGCTGAGG	ATGATCCCACTAAGTCTTGC	V1
YBR084W	MIS1	AGAGCTTCAACATTGCTGAC	CACACGGGTAGAAGTGAACC	V1
YNL304W	YPT11	GGAGCTATACCACTACTGTC	ATTCACGGACCAGGACGTTC	V1
YLR208W	SEC13	GGCTAAGAACTTCGTACAAT	GGGAAGATACCCTCAACGAC	V1
YDR229W	IVY1	GGGCGTCCAACAATGCACAA	GCACTATGATAATCTCCGTC	V1
YBR171W	SEC66	CCATGTAACTCAAGTCAGAC	GATAGAGCGACCATTCCAGC	V1
YJR129C	#REF!	ACAGGAGTACAACTTCTGGA	AAGGACTGTCAATCATTCCC	V1
YOR206W	NOC2	AGACACGACACACTGGCTTA	GCGGGACACATTGAACACAC	V1
YJL201W	ECM25	AGATTCCTACAAGTCCCTGA	AATACCGTGGCAATCGAGCC	V1
YOR155C	ISN1	CGACTCTAATAGCCGATAAG	CCTGTTAGTTAATGGGCATG	V1
YCR051W	#REF!	TATTGCGCGGGACCTCTGTT	AATTTCGATGAACCGGCGGC	V1
YJR010C-A	SPC1	CATGCTCACTAATCTGACAG	CCACGGTCGAGACTGATATG	V1
YOR286W	RDL2	TACTGCTCGATAGGTGGATT	ACACCCGTAGAATCAGTGAC	V1
YNL256W	FOL1	AATCTCTTAGAACGGGCACC	AGACTTCACTAACGGGCCAG	V1
YHR001W	OSH7	ATAGCTGAGTAATGGCCTAG	GGCACTACTCAAGCATCTTA	V1
YDR538W	PAD1	AATATGTAGCACACGCCAGC	AGAGCTTAACCACGAGCAGC	V1
YLR310C	CDC25	GTCGATCTCAGGGTGATAAT	GCCTGTATAGTAGCGTATGT	V1
YJR121W	ATP2	CACAGAGCGGCAAGGACTTA	AATGCGGGAGTGCCTGACAT	V1
YML068W	ITT1	CATAGTAGGCAATGCGGTTC	TGTTAAGAACGACGTGCCAC	V1
YEL015W	EDC3	ATTAGAGGCGCAGCACCATG	CTATGAAGGGAATGCACAGC	V1
YCL044C	MGR1	AGATGTAGACCACCGTGTCC	ACATAGCTTGAAGGGTCCTC	V1
YBL022C	PIM1	GACTGCCATAGACTGCATTC	CGGCTCAACATAGGCCAATA	V1
YLR146C	SPE4	GTCAGCCCTAGATGCACTTG	TATTGCGTGACACCTGCTCG	V1
YGR222W	PET54	TTTACCACCATAGACAGAGC	ATATGAGAGCCACCAGTCGC	V1
YOR205C	GEP3	GCAGCCTAGCTCAGATTATG	GGATGCCACTTCATACACTG	V1
YNL052W	COX5A	CGCCTGAGCTACAAAGATGA	GTGCTCTCAATAAAGCCACA	V1
YLR423C	ATG17	AGTAAGACACCATTCTGTAC	GAGGCACTATAACCATTACC	V1
YGL155W	CDC43	AGAGCACTTTAACCACGGGC	AAACCTCCCTGAACGTGTGC	V1
YDR041W	RSM10	ATGGCGTCTCTCACGTCCGT	AGCCGTATTGTCAGATCGTT	V1
YNL078W	NIS1	ATTATAGATGCAGAGGACCG	TGGTCTCCACGATCACTTGG	V1
YGL018C	JAC1	CCACTGTGTAAAGACTCGGA	CCGCGACATTAAGTCAAGAC	V1
YOL151W	GRE2	TATGGCACCACACGAAGGAC	GCCGACGACATAATCTTTAT	V1
YPL120W	VPS30	AGAGCCATTACACTAACTGC	GAAGACCCATGCACTGAATC	V1
YBR267W	REI1	TACAGACGGACCCAGATGTC	TACTATCCACCATGCTTAGG	V1
YJL179W	PFD1	CTACAGTTGAGAACAGGGAC	AGGAGCACTATATCTCCACC	V1
YJL016W	#REF!	AATCTGGGTGAAGCATTGTC	ACAGTGGCGCAAGGCTCTTA	V1
YMR004W	MVP1	ACACTCGTACCATTGATGCG	CAGTCAGATGGATTAAGTCG	V1
YOR371C	GPB1	CCGATGAAGACAGTAGTGAC	GGCGCTTTATCAATCTAACC	V1
YGR286C	BIO2	CATTGTAGATCAGTCTGTGG	GGCTCTTCAGCAATCCTATA	V1
YBR163W	EXO5	ACTGGACGGAGCTATATTTG	AGATCGCACTGCCGACGAAT	V1
YCL037C	SRO9	AGTAGCCACCTAAGTCATTC	AGTATCCTCACAGGTCTTTC	V1
YIL173W	VTH1	TAGAGAGGATCACACCCAGC	CATATCACTAGACACGATGC	V1
YCR009C	RVS161	CTGAACAGTTAATTCCACGC	CAGTCTGAGTAATCCGTTAG	V1
YDR284C	DPP1	GGATCGCTATAATCTCCTTC	CCCATCCAGGTAACTTAAAG	V1
YOR095C	RKI1	ACATACGGTAAAGCTGTGGA	AATGAGCGTCAAGATTTCCC	V1
YDR349C	YPS7	CGCATTGTGACAGATGTTCG	TTGCATCACGCATGTGGTGC	V1
YPR137W	RRP9	TATCCGTCGGAGCGCGTTTC	AGGTTACCACTACACGAATC	V1
YNL116W	DMA2	GATCAGCCTTTACATTCCTG	GATGGTCTTCCACCTGTGCT	V1
YJR072C	NPA3	CTGTCATAACGACGGCTAAG	ATTGAAGTACGGCTAAGCAG	V1
YKL190W	CNB1	CAATGCACGGTAGAGTATCT	AATACTGCGAAAGCGCGCAA	V1
YDR479C	PEX29	TATGCGCTCGGACTCCTTGT	ACCAAGGTATGGCAAGTCGC	V1
YFR033C	QCR6	GAGGAGACTGTACTATCATG	ATTAGGTCGCCCAGCTACTG	V1
YEL002C	WBP1	ATTGAGCGACTGACCGCCAT	GATAGCATCCGAGACAGCTC	V1
YOL112W	MSB4	TCGAGTCCGGTCCATGAGTT	AAAGGTCGTTCAATGTTCGT	V1
YKR007W	MEH1	GCGTTACACAGATCATAAGC	AATTAACGACCAGTACGCGC	V1
YEL060C	PRB1	CATATACCGCAATGGAGCTA	ATAGGCTCCCAAGCTGCTAA	V1
YGR089W	NNF2	ACCATCAGCAGATAGACGGA	ATACGGAGCGGACACCTATG	V1
YJR135C	MCM22	AGACTATCTCTAATGACCCG	ATCACTTATCGCAGGTAGGG	V1
YGL147C	RPL9A	ATGACGAGCCCATGACCTAG	GTTGAGGCCCTCACCTAACG	V1
YPL207W	TYW1	TACGCGAACCCATTGGTAGC	ACTGCACATAGGGCACAGGC	V1
YFR011C	AIM13	TCTAGTATGACAGAGGGTTC	TATGTTCTGACAGCCTCCGG	V1
YPL262W	FUM1	AATGATGTTGAATGTGCCCG	ATTTGCCGACCCGTACTTGG	V1
YER064C	VHR2	TATTGGCGCCCAGCACGTAG	TTTGGCGCACTACCATCTGG	V1
YKL065C	YET1	TCCGATCTTGCATGGTGGCT	CCACTGTTAGCAGATGTTGG	V1
YCR028C-A	RIM1	TCGCGCTATAAACGAATCCA	TCTGTAATAGGAAGGCAGCC	V1
YLR114C	AVL9	CAGATTCCATAACACGGGAC	GTGCAGACATCTACAGAACC	V1
YOR226C	ISU2	CAGTCATCGTAACCTGATAG	TACATGAAGATAACGAGCGC	V1
YDL092W	SRP14	TAGTGTCCACCATGTCTGGC	ACCTACTGAGGAGACGCATT	V1
YHL021C	AIM17	TAGACGGTCTTGCAGCCTTC	AATTTACAGGAAGGGTCAGC	V1
YHR169W	DBP8	TGAGGCTACCCACCTATGCG	TAAAGCGTACTTACCAGTCG	V1
YLL018C-A	COX19	TTCATCTCGCCATCGGAGTG	TCGAGATCAGAACGGAGCAC	V1
YLR203C	MSS51	TGGCGAGTAATACAGACGAC	CGCCGTTACTCAATGATTAC	V1
YER027C	GAL83	GATACCAGTCTCACCGATTC	GGATGGCTCACACTTCTTTC	V1
YBR036C	CSG2	GCCCATTTCTAATTCCGTAG	GTATCATATCCATGTCCACG	V1
YLR020C	YEH2	TTATCGACTGCCAGCGACTG	ATATAGCATCGCAGCGCAGG	V1
YMR100W	MUB1	GGCCATAACATGCAAGTGTA	GCCGTTGCCATAATAAGAAC	V1
YPL115C	BEM3	ATCCCATAGGCACTGGCATG	TATCTGTCGCCATGCCTGTA	V1
YKL124W	SSH4	CATCTAAGCTAAGGGAGTTC	CATGAGTTTGAAGTACCTGG	V1
YLR119W	SRN2	GACTCTACGATACGTCGCTG	GACGTATTGGCATAGTTGCT	V1
YJR010W	MET3	ATGTCGCATCAGCCAGTAAG	ACTAATGGCCTGGAATGCAA	V1
YOR132W	VPS17	AACAGCCCTGCAATGGTTTA	GAATAGGAACCACGCTGCAC	V1
YNL329C	PEX6	AGACGTAGCGAACTAGACCC	AAGGACCTCTAAGTCGATAG	V1
YLR384C	IKI3	AGATTGCATGAACCGCCAGC	CCCAAATGAAGAGTCGATGC	V1
YNL014W	HEF3	CAGATGAGTACAGAGGATTC	CATGCTGCAACATCGCGTTA	V1
YLR166C	SEC10	ACGGCGACGAGATACTCATG	AACGAGATAGTGACGTACTG	V1
YJL056C	ZAP1	TATTGCGCTCCAGCTCGGAT	CAGCGCGTACTAGACTGGAT	V1
YOL139C	CDC33	ACCTAGATAGCTGTAGCCAT	GCGCATGAGACATTTACATC	V1
YNL212W	VID27	CCGAGATGGTAATTCATGTC	CATGCAACGAACCTAGTCAA	V1
YBL072C	RPS8A	CATAATGTCCAAGCACGCTA	GCGCAGATATAATTCACGAC	V1
YOR022C	#REF!	TAGTACCCGGAACCTAGGGC	ACATAGGTAACAGGAGTCGC	V1
YLR406C	RPL31B	TAACTGCCGCGAGTCGTCTT	ATATACGGGTAACCAGCCGC	V1
YDR486C	VPS60	ATCGCAGTGAGCATCATCGG	AAACGATACGGATTCATGGG	V1
YOR253W	NAT5	CCATTTGATACACTCTGGGC	ACGATCCATAGACACATTGC	V1
YCR046C	IMG1	TCGCGGACCAGATTACTTAG	ATGACAGGCTTTGAACGACG	V1
YPL249C	GYP5	ATATCGAGTGCGACATCCCG	GATACGCTCGCATACCTTGG	V1
YNL101W	AVT4	TGAACCATTCTCAGACATGC	CCAGCGAATGTCGATCAATC	V1
YCR020C	PET18	GACAAGGCTCCAGGTACTTG	CCCGGAGATGTTATGAAAAT	V1
YKL008C	LAC1	AGATAATGGAGATGCGCCTT	CAATGATAGCGCAGATTTGG	V1
YLR100W	ERG27	TAGTAATCGACAGTGAGGTC	TATCCTACCGCATCGTGAGG	V1
YNR055C	HOL1	CCAGTACGCCCAATGAAATA	CAGTCGGTAGAACTATGTAC	V1
YNL153C	GIM3	CGCGCCATACGCTAAATATA	AAGCGCCACTTTGCTCAATG	V1
YDR116C	MRPL1	CACTGTAGGTTAATCTAGGG	TCAGATTTGCTAAGGACTGG	V1
YGL006W	PMC1	TCCATACCGATAAAGTTCGA	TACCATGAGGGAAGATTAGC	V1
YHR161C	YAP1801	CAGTTATTACCAGATAGGCG	CCTAAGATGTTGTAACCTCG	V1
YKR087C	OMA1	CATAGCGTGGAATCTACCTC	CCGAGGCATAAACATCTTGA	V1
YML048W	GSF2	CTCAGTACAGCGGATCACAG	GTGGGCATACAACACCAGCA	V1
YOL140W	ARG8	ACACCGTATTTAAGACTGCC	ATTCCAGGCATCCAGAGTCG	V1
YOL121C	RPS19A	TGGGCAGACACAACGCTACA	ATAGGTATCGCACGCTCCTG	V1
YML037C	#REF!	TAGCTGCTGGAATGCTTGTC	CAGGACCAGTGTAATTGTTT	V1
YML052W	SUR7	ATTTCACTCACCTACATTGG	ATCGCAACTAACGCGCTATA	V1
YGL004C	RPN14	GCGATCAGAACAGATGCCGA	AAGTAGCGATCATAACGCCG	V1
YFR016C	#REF!	CACCGTCACTAAGTAGATTC	CGCATGTTCTGAAGAGTTTC	V1
YNL224C	SQS1	GGCCAGTCTCGCATGATTTG	ACGTCAGGTGTGTAACGAAT	V1
YMR135C	GID8	TATGACCCCGCAGTGCATGC	GTATGCCCGATCATCCTGTG	V1
YOL046C	#REF!	CCTCTGATATAATCGGGTTC	CCACTCTGTTAAGTTGCTGG	V1
YGR284C	ERV29	ACACCAGGGAAGGGCTTCAC	AGCTAAGACCGAGTAACCTC	V1
YDR019C	GCV1	CATCTAGTGAAAGTCAGGCA	CGCATGTTGAAATATGGCAA	V1
YMR058W	FET3	GCTCAGTACCTATATCCTTA	GAGGTAGTTGCATCTCTAGT	V1
YBR025C	OLA1	AATAGCTGCTCAAGGCCAGC	AGACGATCACCATTCGATGC	V1
YOR047C	STD1	TGGCCGAGATATGTAGAAAC	CCTCAGGAAGGAGAAGTCAC	V1
YML072C	TCB3	CCGATGTATGAACAGTTTCC	AATACCCGGCGAATGTACGC	V1
YPR071W	#REF!	CCATAGCACCAAGATTGTGA	ATACGTCATCTCACGAGCTG	V1
YJR131W	MNS1	AGAGTCCTGCCATCTCGGAT	CGTAGCATATCATCCTGGAT	V1
YDR201W	SPC19	TGTACGCCCGTGAGTTTCTT	AAGAGGTAGTAACACTCCGC	V1
YOL055C	THI20	TCCAGAGTTAGGAAGTAAGC	TGAGGATAAAGAACTCGCGC	V1
YOL080C	REX4	TGAATGCGCGTGAAGCACTC	CCCATAATGACAAGTCTCGA	V1
YLR398C	SKI2	TATACACGGGAAGCACGAGC	AGATTCACACCATGAGTCGC	V1
YNL079C	TPM1	CATCGGCATGGAGCTTAGAT	GCCAGATACTTGAATCACTC	V1
YBR026C	ETR1	AAGACGACGTAAGCCCATGC	AGGAGACGTTGATAACTCAG	V1
YDR437W	GPI19	GGCAGACACGTCAAGCATAC	CGCCGAATTACCAATGATGA	V1
YLR410W	VIP1	AATTATCGGTGACGAGCGTC	AGTATCTGGCGATTCCGGTT	V1
YPL009C	TAE2	AGGACACGACGAATCTCGAC	CGCTCCTAAGACATTGTTAC	V1
YHL001W	RPL14B	TGCTCCCGGCAAGAGAAACA	TAGCAACAACCAGTTCTGAC	V1
YER102W	RPS8B	TACACGCTCACAGGTACTAG	TACATTTGCCCATTGGCTGG	V1
YKL120W	OAC1	AAGTACAGTTTAGACCAGGG	TTCCACTGGTCAGCAGATGG	V1
YGR023W	MTL1	TCCCTTCAGATAAAGAGGCA	TGCAATTATGGGCAAAGGCC	V1
YBR106W	PHO88	TCATTCGGTGAAGTTGCGTC	TATTACTGCCCAGGCTGAGG	V1
YLR072W	#REF!	TTGCATTCGGTTAAGACGGG	TAGGTATTAGCAGATCTGGA	V1
YOL062C	APM4	TAATAGCGGCTTAACCGGCG	CCGTTATTTCTAAGACCTCG	V1
YDR268W	MSW1	CAGCTACTGGAATAGTTTGC	CACGACGCTAAATGTCTTCA	V1
YOR088W	#N/A	CGATATGCAGAATAGCGCAA	CATACCGATTCACGTTGATG	V1
YDR316W	OMS1	GTACTATCCACAGTCCTGCG	ATTATTCGCGCCACGAGTCG	V1
YLR098C	CHA4	GGCTACACGAAATCGCTACA	ATTGCATAAGCAGAGTCCTG	V1
YPR190C	RPC82	CCGAGTTATTGACATGAGTG	CAGATTGCAGAAGGACGCAC	V1
YOR236W	DFR1	ACTTGTTAGACATTGGTGCG	AGACCTCTAGCAGTACGTCG	V1
YER118C	SHO1	GCATGTCCTAAAGCTGCCGA	CATATAGGAGCAGTACGCCG	V1
YKL212W	SAC1	TCACGCGATGCAGTCGGTAT	ATCCAGATTCGACGATATTG	V1
YJR063W	RPA12	CTAGCAAAGACAGGGTTGTA	CTAAGGGACTGCAACGGAAC	V1
YJL063C	MRPL8	CCTTTATTACGATGGAGGTG	ATGACGTTTCCCACGCTGTG	V1
YLR283W	#REF!	CACGATTCAGTATCAGTTCG	ACAGATCGCTGAACTGGTGC	V1
YLR312W-A	MRPL15	GAATCAGGTTTGGCAATCTC	GAGCCGTGTCCATCTTATCT	V1
YDL019C	OSH2	CCATGAGTCACAATGAGGCA	GCTGCACATCAATCAACGGA	V1
YLR168C	UPS2	AGAGAGGACCCACACTACTC	GCGCAGCTACAATTACTTCA	V1
YML012W	ERV25	CGCACAGTGTTTCAAGATGC	TCACATGAGCCGAAGGATGC	V1
YGR038W	ORM1	GCGCTATGACTATTCACTCT	AATTCTGGTGCAGCCGCTCT	V1
YOL072W	THP1	GCGCTATGACTATTCACCCT	AATTCTGGTGCAGCCGCTCT	V1
YPR013C	CMR3	ATCACATAGAGAGACGCTGC	CACAGCGACGAACGTGATAC	V1
YJR057W	CDC8	CGCGGTATTAGGACATATAG	TAAAGGCATGTTCAGCAACG	V1
YKL027W	TCD2	ATTGACTGACGCCATGACCG	TCGAGTACGAGCATTCGGCG	V1
YEL050C	RML2	CCAGGATGATGAATACGAGC	TTAGGTACACTACACGTCGC	V1
YNR017W	TIM23	AAGTAGACTGAACTCCGCGC	AGTTATACCAGCCGACATTC	V1
YMR237W	BCH1	GAGCCTTGCACCTATGCTAT	CAGGGCAGCGCAGTTTCTAT	V1
YHL034C	SBP1	AGAGGAACCCACGGCCTTTA	CATAGTAGAACAGTTGGCAC	V1
YKR020W	VPS51	TTACAGCAGCGCAGCTTAGC	TAAATCCCTTTCAAGCAGGC	V1
YKR035W-A	DID2	TAGTGGCTACCAGATCACCG	TTTACCGCGAGACGCTCATG	V1
YIR021W	MRS1	ATTGTGCATCCGGGACCACT	ATACAGGTTGCACGGTAGTA	V1
YOL147C	PEX11	ATGTAACACGCCCGGAATGC	TGAAGTAGACTCTCCCAATC	V2
YML009C	MRPL39	GACTAGGACCGATTGCACTT	GTGAGAGTTGCATTCTTCCT	V2
YLR193C	UPS1	AGCACTATGCGAAGTAAGCC	CTGAGAGTTCGATGACCTGT	V2
YIL149C	MLP2	TTGAGGAGCCCGTACTCTGC	TGGGATAGACCCTAACCACC	V2
YCL027C-A	#N/A	GGCCAACGTAAATCAGCTCA	CATGGATTGAAAGGTGCTCA	V2
YGL017W	ATE1	ACGCTCGTATCACTGGTTAT	ATCGTACTTGGCACTGGAGT	V2
YGR183C	QCR9	CACTATTCTCTAGGAGGGTG	TATAGCCACTCACTTGTGTG	V2
YAL008W	FUN14	ATGGAACCGTTAATCCTGCG	ATCCACTGACGAGAGAGTCG	V2
YER001W	MNN1	GCGGCGGATATGCTATAAAT	GCTCGACTATGCCTTCAGGT	V2
YLR149C	#REF!	AGTTTATACCCACTCTGGTC	CCTAAGGTTTGCGAAAGTTC	V2
YNL047C	SLM2	TAACTGGACCTAAGTGAGAG	AGACGACTAGCACGCCATAG	V2
YKL197C	PEX1	CCCAGGAGTAAATCGCTAGA	CCGAATCGAGAACAGGCTTA	V2
YKR070W	#REF!	GAAGGCTGACGAAGTTTACC	TATAACGGAGCCGAAGGACT	V2
YGR106C	VOA1	GCTCGGCATAAATCTCAACA	TGTCCAGCAGCACCGGATAT	V2
YGR084C	MRP13	CATTCAGTGAGCCAGATAGG	TATGATAGCCACCGCGTCGC	V2
YJR094W-A	RPL43B	GCTACACTGAGCATAGAGCG	ACTTAGGGAGTATCAGCATT	V2
YGL226C-A	OST5	ATACTTGTACCAGGGCCAGG	AAAGTCGGGTGCATCCTTCT	V2
YOR289W	#REF!	CAGACAGGTTAATAAGTGCC	CAAACTGAGTGGACAGACTG	V2
YDR373W	FRQ1	AGTAGCAACCCACGTTCATA	AGTACGCAAACAGATTCGCC	V2
YGR271W	SLH1	GGATGTTTCCTCAGCTCCGT	TAGCGTAACACAGTTGGGAC	V2
YNL227C	JJJ1	AGATCGTCAGGTCCACCGTT	CGCACCTATATTAAACCGGA	V2
YGL159W	#REF!	ATAGTGACGGAACTGTTAGC	AGGACATCTATAACTCCGTC	V2
YER124C	DSE1	TATGACTTCCCATTCGGTCG	TAGTAGGTCGCAGGTCTCCT	V2
YLR295C	ATP14	GCCTGACAGACAATCTATCA	CACGCGGATCTATGATTAGT	V2
YNL142W	MEP2	TTATGACGACCAGCGATGGC	TATGATCTCTGCCAACTTGC	V2
YDR262W	#REF!	TACCGGATTACAGCTCGTGG	TCCTTTGAGGTAGAGCTAGT	V2
YBL107C	MIC23	AATCCGCGTCCAAGTGGCTA	AATCCTGGTCAACTTGTGCC	V2
YKL116C	PRR1	CGCATGACGCAATATGGATA	TGAGTCCTACGCACGCTATG	V2
YDR091C	RLI1	ATAATCAGCGGGAATCAGGC	AAGCCGATGGCATGTCAGAT	V2
YGL195W	GCN1	ATATCTCGTAACGCGGCAGC	ACTACAGTGCGCGTAATGCG	V2
YDL207W	GLE1	TACATCACCGTATGTGGCAG	TTAGCACCTGTCACATCGGG	V2
YBR200W	BEM1	GTGACCACTACAGTTTATGC	GGTTGAACAGCCCTCGAATC	V2
YDR032C	PST2	TACTGCGAGATACGTGTCTG	TAGCACTTCACATACGAGTC	V2
YGR020C	VMA7	GAGTATCTTATCCACCTCTA	GGATGATCTTACCTCACTCT	V2
YHR192W	LNP1	ACTCTGAGCGGATACCGGAT	AGGGAGGTCTCTCACCATCT	V2
YKR068C	BET3	CACGTAATACTAAGTGAGGC	CACAGTAGGTAAGCTGTACG	V2
YDR389W	SAC7	ACACCTGAGTAGGCGCGATT	CCGGCTGCTAAATACTAACA	V2
YER073W	ALD5	CGCGTACACTTACTATCAAG	CAGGTCAGTACACTTATTGG	V2
YML125C	PGA3	CCAGCTACTAAAGGATGTCA	AAGCCTTCAGTGCGTCATGT	V2
YMR313C	TGL3	CATGATCGAGAATGACTCAC	TATGTTGCCGCATCTCCGAT	V2
YJR062C	NTA1	ATGGCATGACGACCTTCGCT	TCACTTCCATCAGGGTGTGG	V2
YML016C	PPZ1	CACGTCACCGTATGTAGAGT	CACCAGCCGTGACTGTGTTT	V2
YAL007C	ERP2	TATCATCTGGGACAGCGTTG	CTCTAGTATGCAGGATGTTG	V2
YNR009W	NRM1	GGGCACACCCAATTTAGACA	GCGCGTCAAGTACAAAGTTA	V2
YGL032C	AGA2	CATCTCCGGTAAGGGATTAG	CACGTTTCATGGTAGAGGTT	V2
YGR108W	CLB1	TAAACACAGTGCTCAAGCGC	CGCGACATCATAGCAACTTA	V2
YGR083C	GCD2	CTCATCAGCTCATAGGAGGG	ACATCGACTAGAGCTTATGG	V2
YLR056W	ERG3	TAGACTTATGTCACACGCGG	TAACATCATCGCATGGCGGG	V2
YKL194C	MST1	GTAATACACTTCAAGGACCC	TAAGGGTTACGAACATCGCC	V2
YEL017C-A	PMP2	GCGCCTCTGCAAGAAGAACA	TAGAGCGTCGCATCGGATAT	V2
YJL094C	KHA1	GCTCGCTAGATTGAGAGAAT	ATACACCGGCATAATCTGTC	V2
YDR140W	MTQ2	ATCGAGCACGTAACCGTTGC	AATCAGCCGTAACGTGAGAG	V2
YGL020C	GET1	AGAGTGCCGCAACCTCAGTA	GCGGCACTTAAACACTATCA	V2
YPR113W	PIS1	GAGACTAAGTTCGGAAATCC	GACCCTTATCCAGTCTTGTG	V2
YNL130C	CPT1	TATGATCCTCTCGACAGGCG	AATACTCCTAATGCTGGCGA	V2
YAL029C	MYO4	TCAGCTTTCACAAGGGCCGA	TAATCACGTCGAACCTGAGC	V2
YNR026C	SEC12	GGACCCGATACACGATGTTC	GGAGCTACGGGCACTCTTAT	V2
YLR143W	DPH6	AACGAGTTGTGACACTTGGT	CCGTCTCGGAAACTAGATAA	V2
YGL005C	COG7	AGATGACACAACCCGGTGCA	AATGTGAGCGAAGTCCACCC	V2
YOR105W	#REF!	AGACCGTACACATTTATGGC	AGACACCCTATGAATCTTGC	V2
YML086C	ALO1	GCACCCATCTTCATAAGTAG	TATCAGCATCGACGGACACG	V2
YGR193C	PDX1	GATCGTTACCCACTTGCATG	GCCTATTGCATATACGACCT	V2
YPL239W	YAR1	TTCGACAGCGGGATACATCG	TACAAACCAAGAGTGTGTCG	V2
YLR099W-A	MIM2	GATAGATTCCCAGCTTTCGC	GCGACGATAGTAGTACATAG	V2
YDL157C	#REF!	TTAGTCACGCCACTGGCTCG	TGGAGTGTATCACCCGTCCT	V2
YGR032W	GSC2	ATAGATACCGCAGCTCACAG	GCGTCAACTAAATTCCAGCA	V2
YMR020W	FMS1	AATTCGCACGCAGGTTGACG	AATTGTATAGCAGTCGTCGG	V2
YMR019W	STB4	CGAGCTTACCAACTACTTGA	CAATCGCAGGTCAGATGATG	V2
YOR152C	#REF!	GCATCTCAGAAATCGGCACA	CGAGTGACTAGATACGCTAT	V2
YPL097W	MSY1	GCAAGTGCTGGCAATCTAGC	AGTATAAACCTACCTAAGGC	V2
YNL009W	IDP3	TTAGCGGCGAGACCTCCTAT	TTGTGTACCCGACCCGCTGT	V2
YPL259C	APM1	TGATCGCTAACAGCTCAGGC	GCTCCTAGAGTATGAGAGAT	V2
YJL034W	KAR2	AACAGACTTTGTAACAGGCG	ATGATTGACCCGCAGACTCC	V2
YML004C	GLO1	CGATCCACAGTAGCTGAATC	GGAGATGACACAATCGCCCA	V2
YIL076W	SEC28	CGCCCAATGCAATTTGTAGA	GGCACGTTGTCTAACTACGG	V2
YML005W	TRM12	GCGCAAATAAAGATGTCGTG	GATGCGCCCTCAGTTTGTCT	V2
YLR091W	GEP5	AATCGGACCTGATATGGCGC	ATAGCCGTCGGATCTGTGTT	V2
YNR007C	ATG3	GAGATCATGCTATTCAAGCC	AGGCGATGATGGCATTTACT	V2
YKL191W	DPH2	TTATCCGGTAGCCATAGGCG	TTAGGTCTCAGCACTACTCG	V2
YER018C	SPC25	CCATATTTGCGAAGGTCGGC	CATGACAGTGCTTAGAACCG	V2
YDR128W	MTC5	AGCAGACTCGAATGTTGCGC	CAAGCCGCTGTCAGATGTGT	V2
YAR028W	#REF!	TTATAGCGAGCACACTGCGC	ATCTGAGGCATAGCCAGTCG	V2
YKR001C	VPS1	TCAAGCGAATCCCATGTGAC	CCGGACATAGCATATTAACC	V2
YOL103W	ITR2	GCACGCTGACTATACTTCAA	GATATAACACATCGCGTCCA	V2
YIL124W	AYR1	GAGATGTGGATCTCACCCAT	GAGCGAGGTCTATATCTTGT	V2
YMR192W	GYL1	AGTATCTCACTACGGCTCAT	TACCTGTTCAGCAGTTGTGG	V2
YCL008C	STP22	CCTGTAGATTGACGTGTAGT	GCCCTCGTGACAAATCGAAA	V2
YNL190W	#REF!	CCTGCGAAGGAATTGGAATA	CAGATACGGGAACACTGTAC	V2
YMR086W	SEG1	AGCCATGATTTCACATTCGG	CTTATTCATAGAGGCTTGGG	V2
YDR047W	HEM12	GCCCAAGTACAATTTCGACA	GCCCAGTGTCAATTTCGTTA	V2
YJL025W	RRN7	CCATAGGTTTAACGCTTGCG	CATGACGGGTGACGTTCTTT	V2
YKR081C	RPF2	ATGAGCATCCTGGTAACCCG	AACCTTACGGCAGAGTAGCA	V2
YIL048W	NEO1	TACCAGTACATTGCCTGAAG	GTTCAACCCATCGGATATAG	V2
YGR085C	RPL11B	AATCTGCATGAAGGTTGAGC	CCCGTGCATCAATAGTAGTA	V2
YPR081C	GRS2	GACCACCGATAAGGCTAATC	GAACCGACTTGACTACATTG	V2
YDL230W	PTP1	CGCCTAAGACCGGATAAAGA	CACTTATTAGGAGGCAGATG	V2
YIL009W	FAA3	TGCCTAAGACCGGATAAAGA	CACTTATTAGGAGGCAGATG	V2
YLR326W	#REF!	GGGATCTTCACAACTTCTCA	TTGCCATGCACAACGAGACA	V2
YJR016C	ILV3	TGGGACTCAACCAACATCGA	TATGGAACTCACCGCGTAGC	V2
YMR134W	ERG29	GCGCGTATAGTGCCTTAATT	TACGCAAATCAAGGCTAGCC	V2
YDL010W	GRX6	GGCTTATAGAGACATACACC	GCAAGAAATACAGCGGGCTC	V2
YOR196C	LIP5	ATTATACCGCCGGAATGGGC	GCCGAATACGTGCTAATTGC	V2
YBR024W	SCO2	TGTGGAACCAAAGCGCCCAA	TGATCCGGTCTAATCCGACG	V2
YBL017C	PEP1	GGTATGACTATCACCCATCG	GAAATCCACTGTCACATTCG	V2
YBR179C	FZO1	ACACGACCAGGGATGGAATC	AGATCACTGTAACCGCCGAG	V2
YAL039C	CYC3	GCTACCAGACCATTTGAGGC	GACGCGCTCGTAACTCATAG	V2
YFR002W	NIC96	CAGATCAGAGAAGGTGCCAC	ATATGCGGCCCATGCCTATG	V2
YIL172C	IMA3	CCAGTCACAAGATAGTGCCA	TATGACGCCATCAGCACGAA	V2
YMR083W	ADH3	CTTGAATCGCAAGGAAGCTA	CAGAAGTGAGAATTGCGCTA	V2
YHL017W	#REF!	AGCATGTGGCATAACCTTTC	CCGTTAGGCAAACATGAGCA	V2
YGL134W	PCL10	GGCTCACTAACAAGGGCACA	CATACAGTCCTCAGGGCTAT	V2
YDR232W	HEM1	GCGCACGATAGATATTTAGC	CTATACCTAATAAGGGAGGC	V2
YGR105W	VMA21	AATCCTTGGTAAGAGTCGCG	ATTATTTCGCGGGCACGCCT	V2
YJR161C	COS5	CCTTGAGCATAATCGAGATC	GAGATCGTTCCACTGCTGCT	V2
YFL004W	VTC2	AACTTGCGGACAATGCCGGA	AGAGGCATTCAACTTATCCC	V2
YDR434W	GPI17	ATAGATTCGGCCACCGGCAT	AATGATACCTCAGTACCGCT	V2
YIL106W	MOB1	CGGATATGTACTAATTGGGC	CGCATTCAGTACATTTACCG	V2
YJL024C	APS3	GCGGCACCATAATTCTACAC	CTCTTTAACTGCCATTACGG	V2
YMR157C	AIM36	CATCACAGAGGCGGAAAGCC	CAGTCTCATTCACGGATACT	V2
YER151C	UBP3	AGCTGACCTCTATATGCCTT	CCTCATTTACACGATTTGGA	V2
YJL151C	SNA3	CGGACATGATAATTTGGGAC	ATTTATGGCGACCCGCACTG	V2
YML110C	COQ5	TCACCTACAGATGGGCGAAG	CGTATCGACAAGATGCACAG	V2
YBR161W	CSH1	AACCATTAAGCAGACGTGGC	AACACTTTCCGAAGAGTTGA	V2
YPL066W	RGL1	GCGCATAGTATATCAGTCTG	CATCGAGATTACCGCGTCTG	V2
YDR034W-B	#REF!	GTGCGAACCAACGTACTACA	GCAGGAACACCACAGGGTTA	V2
YIL027C	EMC5	AAGACATCAGGATCATGCGG	TCAGAAACCAGCAGTTCGGG	V2
YIL066C	RNR3	GGACCCTTAATAATCATGCC	CCGTAATCATAAGGACTTCC	V2
YGL107C	RMD9	GCCATCGGTGTCATGTACTT	TCCCAGGATAGCAAGGAGTA	V2
YAL026C	DRS2	CAGGTACACGCATTCGCTAG	ATGGACGATCTGGTAACACG	V2
YJR044C	VPS55	TGCAAGACGAAAGTCGCCCA	TAATCGCTACGAATGCTACC	V2
YDR175C	RSM24	GGGCTATAAGTCTCTCGAAC	GTTCGACGAGGCGCTATACT	V2
YHL038C	CBP2	GTATTCCGACTGCGGCACTT	TAACGATGTCGAAGACCGGC	V2
YDR384C	ATO3	GAATGGATCTCAAGAGGTAC	GACGATCCTGAATCTAACTC	V2
YLR431C	ATG23	TTCGCTTAAACAATCGGCAA	TCTCGGTACAGAGTTTGACG	V2
YMR089C	YTA12	TTATTGGCAGACGCCCATCG	GACGCACTATTTACCATTCG	V2
YHR037W	PUT2	AGTGTTACCACATCGGCAGC	CGGACGACTATAATAATCGC	V2
YPL231W	FAS2	TACCTTAGTCCACTGGGCTG	TATGTTTCTGACCGCTGCGT	V2
YGR191W	HIP1	AATGCTAACGCACCAGAGGC	GGGCAGCATAAACACTTCCA	V2
YCL014W	BUD3	AATTCGCTCTAAGCTGGGCG	AGTAGGATAGCCTCCCACTG	V2
YFR024C	#N/A	GGCATGACTAAAGCCACTCA	AGAGTGCTCCTCATCTACGT	V2
YGL095C	VPS45	ATGTTCGGAAGAGCTGTCTC	TATCTGGTACGAGTGCTGCT	V2
YIL089W	#REF!	AGCCTAGAGGTCTGTGAAAT	AATGAGTGGTCACCTGCCCT	V2
YOR267C	HRK1	TACTCACGCTGTGCTAATCC	GATACCTCTCGATATGCGCG	V2
YIL016W	SNL1	GCGCTCATAATAAACTCGCA	AGAGGCTCCTCATCCTATCT	V2
YKR046C	PET10	GCAAACGGGTTGTAATTCTG	AGCCACGTCTTACATTTCTG	V2
YOR241W	MET7	AAGCACATTGTCCTCAAGTC	TGAGACGTTCTGTAACCCGG	V2
YDR391C	#REF!	GGCAGGCAGTTCATTCAAAT	GCCGAGTCTGTATCATTCGT	V2
YBR138C	#REF!	TAGACGATGCGCCATGTCAG	AATAGCAGATACGGCCTGAG	V2
YOR242C	SSP2	GGGCTACCTCTCAATTATAC	AGTAATGACCATCTCGACCA	V2
YJL133W	MRS3	CCTATACTGGAACTGACGCA	ACGACTAGATCATGGTAGTG	V2
YAL035W	FUN12	GTGCAGGCCAAATGCCACAA	AGCGTACTCTGAATGCCGTC	V2
YJR014W	TMA22	TAGACACGGTACGAATGCCC	AACGGAATTGAGTCAATCCA	V2
YNR051C	BRE5	CGAGTAAGTAGAGCTGATTC	CCTAGACGGAGATATGTTTC	V2
YKR026C	GCN3	TATAGGTCCCGATACGCCGT	ACCCTTTGAGGAGCGGTAAT	V2
YJR011C	#REF!	GATAGCTTACCATCTACGCG	TGATTCGTAAGACTGGATCG	V2
YPL220W	RPL1A	TTGCCTGCATCCAGTTAGGG	CAGACGGCGTTAATACCTGG	V2
YPR029C	APL4	CTCTCAGGAGGAAGAATGTA	CCTGGCATACAATACAGTCA	V2
YER024W	YAT2	AGATATTGCCAACCGGCCTA	AATTCGGCTCAACATGGGCC	V2
YCR067C	SED4	ACTCATATTGCATGGCGCTG	ATAGATCCAGCAGATGTGAG	V2
YBR254C	TRS20	GCGGTCGATACATTTCTAAG	GAGCGACTCCGATTCGTACT	V2
YDL088C	ASM4	GATGAATGCGAACCCAGCAC	ATCTACGCGGACGCATAGTG	V2
YPR127W	#REF!	GAACGCACTGCAAGTATGTA	TGCAGGGCAACAAACGTCAA	V2
YJL144W	#REF!	TTACCACTGCCGAGGTGTGT	ACTAACTTTCAAGGATGGCC	V2
YOR089C	VPS21	AACTGCTTCGGAGTAGTGTT	CCGGTGTGTAAAATTCTCTA	V2
YNR027W	BUD17	TTATCGAGCACAGTGTCGGC	TAAGCGATTAGAGCTATGCT	V2
YBL029C-A	#REF!	ACATAACTTTCCAGAAGCGC	AACTCTCGTGAATCGTTGTC	V2
YER047C	SAP1	AATATGCGGAAACCGGGTCA	ATAGTTGGACCACCGTACTC	V2
YIL138C	TPM2	ATATGCTCGGAACGTGTCGC	TATGCCAGGTGCCATTCGTT	V2
YML020W	#REF!	TCCAGAGAGAGCTTCATAAG	GGTTATTACCTCCCACTATG	V2
YKL073W	LHS1	ATTGATACAGGCCGATATGG	GCGTCAGCCACAATCATTAA	V2
YHR062C	RPP1	ATAGCGACCCAACCGGATGA	ATTGTAATACCAGTTCAGCC	V2
YDR473C	PRP3	CATATAACGCACGATCTAGC	GCTAACCATCAAGCATCGTA	V2
YOR252W	TMA16	TTACTTCGGCCAGTCGAGTG	TATAGGCTCGGCAGTTCGTA	V2
YPR100W	MRPL51	GCACTCACTACAGATAGATC	ACTGCCTAGCAAGCATGATA	V2
YOL019W	#REF!	CCACATTGTTCAAGGACGGC	CCGACATTACTTAACAGTGC	V2
YIR011C	STS1	GGACACTATACAGCATTCTC	CGAGTGCTTAGATGCTAGTT	V2
YHR122W	CIA2	TTCTACATACCGGCATACAG	TATTCTATGCCACGGCTCGG	V2
YNL189W	SRP1	CTATTCAGGGCAACGGTGTA	TTAGGCACCACAGTACGAAC	V2
YKL051W	SFK1	ACGACCGTCTAACTATGCAG	AACCACTGCGGACATAGGAG	V2
YML091C	RPM2	ACCAGTATGTGGAAGCTCAG	CGTAACGTATGCTAAGTGAG	V2
YMR200W	ROT1	CCCGTGAGGCTAGAGATTAT	CTATTGGATGTCACGGGATT	V2
YCL049C	#REF!	AGCATTGTCTCAGTCCGTGT	GAGCATGATACAGGATCTTC	V2
YOL087C	DUF1	CCATTATTGGAAGGTTAGGC	CCTTTCGTAGATAGGAGAGT	V2
YDR342C	HXT7	CTTCAGCAGGTATTTAAGGG	TCAGGCCAGCTCATTCATGG	V2
YLR462W	#REF!	ATTAGCAGCGCCATTACGCG	CCGCTTGATACATTTGATCG	V2
YDR358W	GGA1	AGACACCTATTTGTAACGGG	ATATACGGGCCATTCCCTGG	V2
YDL135C	RDI1	AATCGCTGCTAAGAGCCGAG	CCGGCTTATGAATAGATAGC	V2
YBR007C	DSF2	GCCGTGAACTTAACTCGATC	GCGGCATACGTTCGTCAAAT	V2
YOR109W	INP53	GCCAGGGCTATTAACTTTAG	TAAACCTCTTTGAACGGACG	V2
YML128C	MSC1	TGATCCCACACATATAGAGC	AAACCCGCAGGATGCAGATG	V2
YKR088C	TVP38	GTATGCTCATCATCCCGTAT	CTATCGAGGATCACGGACTG	V2
YDR405W	MRP20	GGCTACTCGTCATATTACCT	TCCCGCGAAGTAAACATTCA	V2
YIL125W	KGD1	ACATTCAGATGGACTGCATG	GCAGTTACCGCATAGCTGTG	V2
YIL108W	#REF!	AAGGATCTTTCAACAGCTCC	AATTAAGGAGCATGGACCTC	V2
YLR206W	ENT2	TTATCACTGGCGAGAGAGCT	GGCATACGAGAATAGCCCAC	V2
YDL089W	NUR1	AGCCCGGTCTCATCGTTGTT	CACGTTCGCCAAGTACGGTA	V2
YPL069C	BTS1	GATTTGCGAACAGCGATCCC	GGAATCATGTGTAACAGGTC	V2
YOL059W	GPD2	AACACTGGTAAACGGTGCGA	AAGAGTGACGTAACCTCCTC	V2
YOR018W	ROD1	GCTACACCAACATAGGTTCA	ATATCTGCATCAGGCTGCGG	V2
YPR172W	#REF!	AAGCAGTGGGAAGTCTTATC	AATCGACGCTAACGACTGAG	V2
YHR144C	DCD1	GACGATATGATAACCTCTGC	ACTACAGAGACACTTCTAGC	V2
YOR322C	LDB19	CGAACTGAAGGCATATTTCC	TACGGTAACACAGGGTACGC	V2
YDR393W	SHE9	CTAGATGACATGCTCTCAAG	AGATATGAACCATCGTCCAC	V2
YOR165W	SEY1	GAGTTATCAGCACCTCCAGC	GCAGCTCTCTCAGTGTTTAT	V2
YLL012W	YEH1	AATGAGCTGGAAGCCTCTGC	CCATGTGGAGAAGATCGTAC	V2
YHR025W	THR1	AGCCACCAGCTAATTGGAGC	AAGATTAACGCACACTTCGC	V2
YBL047C	EDE1	TACCGATTTACAGGTGCGTG	TTACCGAGTGTATGACAGGT	V2
YGR021W	#REF!	AATATGATGCACGCGCTGCC	GCCTGCACCAAATCTTGAAA	V2
YMR170C	ALD2	GATCCTAGTCCATAGCCTGA	GATCTAGTAGCCTATCGACT	V2
YHL018W	#REF!	CCACTGCTACAAGTCTATGA	TGATGCACTAAATGACCTCA	V2
YBL084C	CDC27	ATTTAGCGACGAGGATACCG	AAGTATCCCTCACCGTTGAT	V2
YMR177W	MMT1	CTATACGCAGGCATGAGACG	CCGCAGATGAAATGTGAGCA	V2
YDR027C	VPS54	AACATACGAGGCGGTGCAAT	ATGAGACGGCTAGTACGCCT	V2
YDL006W	PTC1	AGAGATCACTGACACCGCAG	GAAGGCATCGTAACTCCGAT	V2
YPL226W	NEW1	CATGGTATTACAGGTAGCTG	TCTGGACGCCGATCACTCTG	V2
YKL179C	COY1	ACGAGCTAGTTCTCAGTCTC	CCGGCACGTAAAGGAGATCA	V2
YNL119W	NCS2	ATAACCACCGGGAAGTGTGA	CCGTGAGATTCAGCTTTATG	V2
YHR073W	OSH3	GCGGGCTATACATCATTATC	AGTACAGTCACCATTCAGTC	V2
YER042W	MXR1	GGTGACTCAACATTGGGTTA	GGGTACATATCAATCTGCAC	V2
YBR084W	MIS1	AATCTCGAAGACGCCGGAAG	ATGGCGCACACCTTAGACAG	V2
YNL304W	YPT11	ACCATAGTGATGAAGTTGGC	AAGTACAGAGCCACATTTGC	V2
YLR208W	SEC13	TGCGATATAATAAGTGAGCC	ACAACGCTATCAAGTATCCA	V2
YDR229W	IVY1	TATTCGACCATGCCCAGAAG	CTACTCGTGTGAAGGTTAAG	V2
YBR171W	SEC66	CCAGCCTGTAAAGGTGTCGA	CCAACCCGGGTTAATGGATG	V2
YJR129C	#REF!	TAGTACGTCCGGCAGTTCCT	ACCATAGTTTAACGAGGCGA	V2
YOR206W	NOC2	AATAGCTGGTTAAGCCGTCG	ACTTTCTACGGAGGCGTGCT	V2
YJL201W	ECM25	CGCCAGACGTTAGTAATAAG	ATGTACCAGCCAGACACCAG	V2
YOR155C	ISN1	CTATATGAGTACGGCCTCGG	TAGTCTCATCCATCGCTGGA	V2
YCR051W	#REF!	GATAGCTCTAAACTTCCCGA	GGTACATAACCAGTCTCTAC	V2
YJR010C-A	SPC1	GCTAACCCGTAATTGCTATC	GACCGTAGACTGTTCTGAAT	V2
YOR286W	RDL2	AACCTACGGGCATGTTCGTG	AATAGACCTTCATCGGGCGT	V2
YNL256W	FOL1	TCAGACGGTGTCCATACTGT	AGCAGAATTAACGGCCTGTA	V2
YHR001W	OSH7	GCCGTAGTAACAAGCTCACA	GCACTCGTAGTCATGTGTAT	V2
YDR538W	PAD1	GAGAGTATGCGTTCCACCCT	TGCCCGAAGAGTAAAGTTCA	V2
YLR310C	CDC25	GCACTCATTCTCAGTAATCG	TCGCAGTACGTTAAGTGTCG	V2
YJR121W	ATP2	AATCATGGCTCAGTAGGGAT	GCGATGCTCTCATTAGCCTA	V2
YML068W	ITT1	GAAGTGGTCGTCATACTCTC	TTACTAAGTGGCGAGAAGTC	V2
YEL015W	EDC3	ATACTCACTGAAGGTCCGGC	AACATCCAGGTGCGGAACGA	V2
YCL044C	MGR1	AACTACTGTAAAGCGGCGGA	ACTAGGGACTAACTTCGCTC	V2
YBL022C	PIM1	CCGCTCTACTATAAGAAAGC	GGATAATCTACTTCAACCGC	V2
YLR146C	SPE4	TTATAGAGGCTCCCACTCGG	TACGGACTTCCAGTTATGCT	V2
YGR222W	PET54	CAATCCAGGCTATATCGCTG	ATAGGCACGGAATCTTGCGC	V2
YOR205C	GEP3	ACTTGACCGAGTACGTCGTG	GCAGGGATTATCATACTGTG	V2
YNL052W	COX5A	ATATTCATCTAAGGCCGCCG	AAGGTTAGCTCATCGGGACT	V2
YLR423C	ATG17	ATTGTGAGGCACCGCCGAAT	AATTAGTTCTCATGCCGCCT	V2
YGL155W	CDC43	GGGCGATCCAAACATATCCA	CAGAGTCGTTTAACTGACGG	V2
YDR041W	RSM10	GCCCGGACACAGAATTATTA	GTCCCACGCTAAGAATTAGC	V2
YNL078W	NIS1	TGACCCAGACCAGTTTGTGC	TTATGCGACCGAGCACTTCG	V2
YGL018C	JAC1	AGCTAAGCCCGACGTTTCAG	CATTCAGTTACAGAGGTGAG	V2
YOL151W	GRE2	CCAGTCTTCAAACGTGTTCA	CAGACGTTTACAAGCTCGTA	V2
YPL120W	VPS30	GCCCTATGATCTAATTGTGC	CTGACGCACGGATCTTTATG	V2
YBR267W	REI1	GCGACACCGAGAGCTTATTC	CTTGTCAGAGATAGGCAAAG	V2
YJL179W	PFD1	CGCTTACTTACATACCGTAG	CCCTTGATGGGACTGTAGTT	V2
YJL016W	#REF!	TTTCTAACAGGCGTTGGAAG	ATTCAGGACCCACTGGACAG	V2
YMR004W	MVP1	ATATCTCACATGCCCGGAAG	GCAGATATAGCATTCTCCGG	V2
YOR371C	GPB1	GGGTTACACACCTATATGCC	GCGACTCCATTAACTATACG	V2
YGR286C	BIO2	CGTAACATAGGCTCAAGGAC	GCACCAGTAGTCAACTTTCA	V2
YBR163W	EXO5	TTATCTGGCGTACCGCTCGG	ATTCCTGGGACACTTCTGGG	V2
YCL037C	SRO9	TATGTACTCGCAGCAGCTCG	ATTGGAGTGCCACCATCTGC	V2
YIL173W	VTH1	GACCCGATTCCATTTACTTG	CTCGGCTAGGATAGAGAAAT	V2
YCR009C	RVS161	GCACGGACATCATCATAATC	GCCATTGAGAAACATTCCCA	V2
YDR284C	DPP1	GGCGTATCCCAGATGTCCTC	TCCGGCAACCAATGGGAAGA	V2
YOR095C	RKI1	CGGAAGTCTGGTGAATCTAG	GGATACGATCTACGCACACG	V2
YDR349C	YPS7	TAGGCTATCCTCCACGTATT	ACAGATGTAATAACCCGTCC	V2
YPR137W	RRP9	GTACTGGACTCCTAGCTCTT	TAGTACGGGATAAGGCAGTC	V2
YNL116W	DMA2	AGCCGGTGATCGAGTTCTTT	CCCGGAACGTCAATGAGAAC	V2
YJR072C	NPA3	TTGTACGACGCAGTCTTCCC	TATGTCGGACGCCGTAGACT	V2
YKL190W	CNB1	ATACTCTGCGAAGCGGTAGC	GAGCATACACCAGTCTTAGC	V2
YDR479C	PEX29	AAGCTCCTGTAACTCTAGCG	ACATACTTTGCAGGTAGTGG	V2
YFR033C	QCR6	TTACGCTTCACACTCGTGGG	TTGGCGGGCCCAGCTATTCT	V2
YEL002C	WBP1	GCTCCAGAGACATATTGAGA	AATTCAGCGGCACACAGGTC	V2
YOL112W	MSB4	TGGCAGCTAATCAACACCTA	TCAGTCGAGCCGATGGATCT	V2
YKR007W	MEH1	ATTTAGCCGTAATGCCGCCG	ATACGTTAGGCACCTGGACT	V2
YEL060C	PRB1	TGCATGGCCTTACAGGTCTG	GCCCATCCGCAATATGTATA	V2
YGR089W	NNF2	ATGATACTAGCATCGAGGCG	ACTAGAGCTGCCTTAATGCG	V2
YJR135C	MCM22	TATCACGTCGCATGTAGTGG	GACGATTCTACAGTCCTTGA	V2
YGL147C	RPL9A	GGCAGCAGAGTTAATTCATC	AGGTCAGACAGCATTCGCTC	V2
YPL207W	TYW1	CATGGATCAACAGCCGCTTA	TGTCCACACAGGTAGAACAC	V2
YFR011C	AIM13	CCTAGAGACGTAGATATGCG	GTACCCGGTTTGAAAAGTCG	V2
YPL262W	FUM1	CCCATACATTGTTAGAAGGC	CATAGAGGTTAAGCGATACG	V2
YER064C	VHR2	CCACACTTCTATAAGGGCAG	CACCCAGACCGATTAAGGAG	V2
YKL065C	YET1	ATACCTTCGGCAGGATGCTG	TACAGCCATGAATCTATCGC	V2
YCR028C-A	RIM1	GCTCAACAGAACTGCATTCA	ATATCTTGACGAGCTGCCGG	V2
YLR114C	AVL9	GATGATATGGCATTCCAGTG	ATGGACCTCTACCGCGTATG	V2
YOR226C	ISU2	CTCCTAATGTACGCTAAGAG	AACACTCGTTGGAATGTGAG	V2
YDL092W	SRP14	AGATGTAGAGCATATACCGG	CAGACATCACGATATGGCGC	V2
YHL021C	AIM17	GATCGTACTCACCATGTATC	AGAGACGACCTAAGCCAGTC	V2
YHR169W	DBP8	GAGTAATCACCAGTGTGCCC	GGCCTCTACGAATATAATCC	V2
YLL018C-A	COX19	CATAGGTGTAAATTCGCGGA	CGTAATAACGAATCGCTCAC	V2
YLR203C	MSS51	ATCGTTTGAAGACTTGGTCG	ACCTTTGGAGGATGGTATCT	V2
YER027C	GAL83	ATGTCGCACACCCGATGAAG	CATAGGGTCGTACATTCCGG	V2
YBR036C	CSG2	GGCTCTAACCAACCGGAAGA	GAGGGCCTATTCCTTCCATT	V2
YLR020C	YEH2	AATAGGCGCTAAGCTGATAG	AATCAGTATGAAGCGAGCGC	V2
YMR100W	MUB1	CGCTATCATGTCATCGAATG	GAGATCCAGGTCGCTACATG	V2
YPL115C	BEM3	CACTGCGTGTTAAGGATATG	CTAGCTGATACATTGGCAGA	V2
YKL124W	SSH4	CATTAGCCAACATGCTGTGA	TCACTCGGTGCATGAGGACT	V2
YLR119W	SRN2	GATAAGCCCTAAGGCAGGTC	GGAGTTCGACCTACTGCCAT	V2
YJR010W	MET3	GCGCCACAGCACTTAATATA	TCATCTGCGACACGGATTGG	V2
YOR132W	VPS17	CCTCTACAGCAAGTGGAATA	CTCATGTAGTGACAGTGCTG	V2
YNL329C	PEX6	AAGGGCATCCAAGTTGTTGA	GATTATTGTCAAGCCTCGCC	V2
YLR384C	IKI3	TATGAGCCGGTACGTGTATT	AGGTACTTTCAACTGCGTCC	V2
YNL014W	HEF3	GACTATGGCGTGTCACCGTT	TAAGGACTGATAAGCCGGTC	V2
YLR166C	SEC10	GCGCTGCCATAATCCAAATA	TATACTGATGCAGACGGCTG	V2
YJL056C	ZAP1	ACAGCTCTTAAACGGTGGGA	AATTGAGGCTAACGCCCGTC	V2
YOL139C	CDC33	ATACCACGCCAAGAGGGTGA	AACACGACGCGAATGTAGCC	V2
YNL212W	VID27	ATCTTCACGGGCCAGTAGTG	ATAGGCACTTCACCAGCGTG	V2
YBL072C	RPS8A	ATATGCGGCTACATCCCTGG	CAAGAGACGCTAATTGCGGC	V2
YOR022C	#REF!	ACAGTATGGACAGTTCCGCG	AAAGGCCAGTGGATTCATGA	V2
YLR406C	RPL31B	TTTACTCGGGCCAGGTGCAT	TATACCGTCCGAGGTGATGT	V2
YDR486C	VPS60	CCACGATACCAATTCATAGA	CTAGATAGACGACGCTACAG	V2
YOR253W	NAT5	TATAGTCCAGTCCAGGCACG	TACTTAGGCGCATCAGTTGG	V2
YCR046C	IMG1	GGGTACTTCACCATTCCTAG	CACACGGCATGGGATTAACG	V2
YPL249C	GYP5	TATATGTGGACCAGTATGCG	GAGTTACGCACCTACAGTCG	V2
YNL101W	AVT4	ACAGACTCCCTAAGATGCAG	TATCCCAGCCCATGAGGAGA	V2
YCR020C	PET18	CGAGATAAGGTGCGATCACT	ACGCAGTGAGTAGCATCCTG	V2
YKL008C	LAC1	GATGTCACCTAACTCATGTC	TCAGATGTGACAAGAGTCGA	V2
YLR100W	ERG27	CCCTGAAGTCTTGCCAATTA	ATATTGTGCAGCGCCCACTG	V2
YNR055C	HOL1	GAGACTACTGAACCTTCGGC	GACGGTACTCCATTTGTATG	V2
YNL153C	GIM3	TTCTTACACACCCAGGAGAG	TAGATAGCCAGCCACCATAG	V2
YDR116C	MRPL1	GGCTAACCTTCAATGACTAT	TAGAGTTCCACACAGTGACC	V2
YGL006W	PMC1	CGACCTGCTAGATTATTCCT	CACCTAGAGTTCTTGCAGTT	V2
YHR161C	YAP1801	ACGCCGACATTGCATTCAAG	CGGCGGTAACGATTATTAAG	V2
YKR087C	OMA1	GTACAATAACCACTGAGGCC	AAGGTACAGCGACCATGTCC	V2
YML048W	GSF2	CAACTAGCCGCAAGGGAGTA	CGCACCTAGATAAGATTTCC	V2
YOL140W	ARG8	TAGTACGCAGCATCTGGACG	TGAGCAGGTACATCTTCCGG	V2
YOL121C	RPS19A	GGGATCACTAAACTACCTCA	GCGCTGAAGAGAACGGTAAC	V2
YML037C	#REF!	TCCTCGACGCGATGGCATAT	GAGGTCATCAGACGTATATG	V2
YML052W	SUR7	CAGAGCTGTGCAATGATCCC	GCGCCATCACAAGATTTACA	V2
YGL004C	RPN14	AAGCCAGCAGCATTCCTAAG	GCCTACCGTATAATATCCAG	V2
YFR016C	#REF!	GTCGCATCGTGCTCAACTTG	TGAGATCCGCTACATGCTCG	V2
YNL224C	SQS1	CCAGTGATCCAATTCTGTGA	GAGCATGAGGTACTATGACT	V2
YMR135C	GID8	GAACAACCAAGACGTGTGTC	GACTCCGTACTCACTAGGAT	V2
YOL046C	#REF!	AAGTATCTCGCACCGGCATG	TTCACGGAGCGCAGATCATG	V2
YGR284C	ERV29	TGGACGAGGACAACCACTCA	TAATTCCAGCGAAGTCTGCC	V2
YDR019C	GCV1	CAATAGTGGGCAAGCAGTTA	GAGCACCTGGCATTGTCCAT	V2
YMR058W	FET3	CAGATCATGGAATATCACGC	CACATTTAGCAACCGCTGTA	V2
YBR025C	OLA1	GTACTCCGGTTCAGCATGTT	TAGGAGCTACCAGGACCTTC	V2
YOR047C	STD1	ATTACCCACGGGAGACATCG	AGCCAAAGAAGACTGTGTCG	V2
YML072C	TCB3	GAGTGCTATCCACGAGACTG	ACATCGCCAGCAGGATTGAG	V2
YPR071W	#REF!	TTGTACCCACTAGACGTGCG	TTGAGTGTCCGACATACCCT	V2
YJR131W	MNS1	ACAGCTCTGCTAAGATGGAG	CCTCTACTCTAAGCTATGAG	V2
YDR201W	SPC19	TCCTTGTCGGCGATGCGATT	ACATAGTGAGAACTTGGGAC	V2
YOL055C	THI20	GATACTGTCACACCGTTGCG	GAGCGCCCTATACTATCTAT	V2
YOL080C	REX4	GCCAGATGTCAACACAGCTA	TCAGGCGCAGAACTGTAGAC	V2
YLR398C	SKI2	AGACTGACGCAAGGCACCTA	GAGTCCCTGGCATCTGATCT	V2
YNL079C	TPM1	TATTGGGAGCCAGGTTTCGT	TCGCGGACTCTACGGTATGT	V2
YBR026C	ETR1	CGTTGATAGCAAGCGAGATA	AGCGAGCAGCCATTTATCCG	V2
YDR437W	GPI19	GCGTGACAGTTTGTTCAATT	GAGGCGACTTCATTGATACT	V2
YLR410W	VIP1	CATAGATGGAAATCGGCGCA	CGATCACTTCGACTCATGTG	V2
YPL009C	TAE2	GCTCGTATTCAAGATCATCA	GTAGTTACTGCCACCCTATG	V2
YHL001W	RPL14B	ACTTCTGCCACGGGTGACAT	AGATTTACGTCATCCCAGCT	V2
YER102W	RPS8B	TACGAAACTAAATCGGCTGC	TGAGAGGACTCCACGACATC	V2
YKL120W	OAC1	CAGATCAGGGAACTTAACGC	CCAGCGAGTTAACGAGTTAG	V2
YGR023W	MTL1	ATCGTAGTGTCACGGCTTGT	CGCCGTGTGAAACATACTAA	V2
YBR106W	PHO88	CCACTCAGATCATATCCTAG	GATGATACTGAACACCAGCC	V2
YLR072W	#REF!	GCATCCTGCACAATGAAGCA	TAATGGACATGACGCGACAG	V2
YOL062C	APM4	TGGAATACCCACGAACGGAC	CCATAAGACGTTGTGAAGCC	V2
YDR268W	MSW1	GACTGTCTCTCATGCCTGGT	CATCTGACACTGGTGCTAAT	V2
YOR088W	#N/A	CTATACCAAACATACGGGTC	TAAGGACGGCTAACCTCTTC	V2
YDR316W	OMS1	AGCTCACAGTACAGAGACTC	ATAGCTCGCCAATGGGCCTA	V2
YLR098C	CHA4	CTAGTGTAATCAGGCTGTCG	CGCGTATCATCATTACTTCG	V2
YPR190C	RPC82	CATATAGGATAATGGGCCAG	CCAGCTAGGCAATCATACTA	V2
YOR236W	DFR1	CTATCACGGGTCAGGAGTCT	CGATCTTGGGTCACAGCGTT	V2
YER118C	SHO1	TATGGAACGACATCCGAGCC	AGCACACGTAGGAACTATCC	V2
YKL212W	SAC1	CGGGAAGATTTATGCAATGC	GGCCGCATTAGTTAGAAATC	V2
YJR063W	RPA12	GGTGTACCTCCAACTTACTA	GAACGTCGCGGACTTGATTT	V2
YJL063C	MRPL8	TGAGCCGCTTGCACTAGAGT	GCAGTTCGCATCATACCTTG	V2
YLR283W	#REF!	TTCGACGCGAGACTCTAGTG	GATTTCCACTCATATCCGTG	V2
YLR312W-A	MRPL15	AAATTCCGCTGCGTCAGGGT	CTCGGACGAACAACGGTGAA	V2
YDL019C	OSH2	CCGATTTGCACAATGTCTCA	ATGCAGTCGTCACGTCTCGT	V2
YLR168C	UPS2	AGGGCTCGTCGATTCGTCTT	CCATAAGGTAAATCGGTCGA	V2
YML012W	ERV25	ATGAGGCGTCGAACTCTTCC	AACTGCGTGGAATTTCGCTC	V2
YGR038W	ORM1	TGTTAGTGCCGCGCTACCTC	AGGAAGTACGTCTCCCAAGA	V2
YOL072W	THP1	CCGGTTGCCAAAGCGAGAAA	CGAGGAGAAGAAGTTCCCAC	V2
YPR013C	CMR3	CCTTTGAAGCAAGCAGAGGA	TGCACTAGCCAAGACACGGA	V2
YJR057W	CDC8	ATTGATGACCGACCGACACG	ACTTTCCTAGCAGTGAGCGG	V2
YKL027W	TCD2	CAAGCAGGAGTGACATCGCG	TAATGAGGTCGAATGTCTGC	V2
YEL050C	RML2	TTTCACGCTGCCAGTGTCTG	AAGGCTGATGAATGCTGATC	V2
YNR017W	TIM23	AACGGACGAGCAGTACCTAG	ATATTCCCAGCGGGCTAACG	V2
YMR237W	BCH1	TGCAGTAAGCTCAATCACAC	AGTAGGCACTCTCCTCAATG	V2
YHL034C	SBP1	CAGTTATAGCCATTGAGCCG	CATCACGTTAAAGCACGCGA	V2
YKR020W	VPS51	TTATAGCACCCATGACGGGC	CCTATTATGGGAATGTGTGC	V2
YKR035W-A	DID2	AGTGGGATCTCCTCAAGCTC	GGCCTCCACGAGAAGCAATA	V2
YIR021W	MRS1	AACCCTTTGTAAGCGGTGCG	TCACGTAGCGCGATGTCTGT	V2
YOL147C	PEX11	TATAGACGGACACAGTCGCC	GAAGATAGATCACGCCGTCC	V3
YML009C	MRPL39	TAGTTTATCCGCCCGGTGCT	TCGATTCGGAGATCCTGGTT	V3
YLR193C	UPS1	GAATACGAGGTCACAGTACG	AATTGTCCAGCATTGTGCCG	V3
YIL149C	MLP2	ATCGGATTTGCACTGGCCGT	TGATGTGTCATACCCGCCTT	V3
YCL027C-A	#N/A	ATGTACGGAACCTCGATGCC	CAGGGATGAACAGTCCTTCC	V3
YGL017W	ATE1	CAGGGATGGTCATATTTGCT	CTCTCCGGGATTGCGATGTT	V3
YGR183C	QCR9	TTATGAGACCGCTGCAACCG	CCTCGTTAATGATATGTCCG	V3
YAL008W	FUN14	ACTCTCATTGGGTGTAAGGT	AGGGCTCTACTAGCTTCCTT	V3
YER001W	MNN1	CTACTAGAGAGAGATACGCG	CCTCATATCGCATTAGATCG	V3
YLR149C	#REF!	TGTTTCACGCGGGTCCATCT	GATTCCTAGCTCGCGCTGTT	V3
YNL047C	SLM2	ATATGGAGTCCCGCCAGCAT	AACATGCGATAAGGCGGCTC	V3
YKL197C	PEX1	ACCTGCTTGGCATCTTGGGT	GAGCGACTGCGACTTAGCTT	V3
YKR070W	#REF!	GAGCACTCAGTACCAGTCAG	GATACATCTCCAGCTTACGC	V3
YGR106C	VOA1	ACAGCTCACCGAGTATAGTG	ACTATGATGGCAGACCCGTA	V3
YGR084C	MRP13	GGTAGGACTTCACTTCATCT	ACAACTCCTTCGATGGTGTT	V3
YJR094W-A	RPL43B	CTGGAGACACGATAGACAGT	GCGCCATATAAATTCTCGCA	V3
YGL226C-A	OST5	ATGCTGACGCAGATCCGATG	AGACCTTGCACATGCTTGCG	V3
YOR289W	#REF!	TTAGGGATACGCAGCCATCG	TTAAGATACCTGCCCATTCG	V3
YDR373W	FRQ1	TTATGTACCATCATGCCCAG	TCGCGCATAAGACCAATCGA	V3
YGR271W	SLH1	GAGTCTCGTGCATCTGCTCT	AGCAGAGCGCACCGTATGAT	V3
YNL227C	JJJ1	GGCACCGTAGTCACTTCTAT	ACACCGTCTTCAGTGCTATT	V3
YGL159W	#REF!	CACCTGCGGTCGATGTTGTT	GTGTGTACCGTCCCTCAGTT	V3
YER124C	DSE1	ATGAGCCCGTGACTGCGATT	GCCGAAGTTATCGCAATGTA	V3
YLR295C	ATP14	TTATGGTGCAGCGTGCCACT	CTACTGTTGAGAGCGGTATT	V3
YNL142W	MEP2	GCGGCGTTAAGACAAATTAC	GACGGCGTTCGACTCTTGTT	V3
YDR262W	#REF!	ATGTTTCCGCGACGCCGTTT	CAGGTACTGCGATTTGAGTT	V3
YBL107C	MIC23	GCATGGTGCATAATGTGTTC	GCGCACCATAATTTCTAACA	V3
YKL116C	PRR1	ATTGTAGACGCGCCGAACCT	GAGGCGTTACGAGCTTTATT	V3
YDR091C	RLI1	GGAGGATACTAACCTACACC	TTACGACCAGAACGGGACAC	V3
YGL195W	GCN1	CAGACAGAGACAGGTGTACC	TGCCATAGAAGCCAAGGTGA	V3
YDL207W	GLE1	ATACAAACACGATTCGCGCT	AGTGTATCCCTCTCGACGTT	V3
YBR200W	BEM1	AACTCAGCGGAATGGATAGC	AACATGCTCCAATGCGCGTA	V3
YDR032C	PST2	GACAGGAGGCGAATATGCCC	CACACAGTATAAGACTTGCC	V3
YGR020C	VMA7	TGAGTTACCCTACCTATCGT	AGGTTCCCTACACGCTTACT	V3
YHR192W	LNP1	GGTTAATTTACCCGAATCCC	GGAACGAGTAGCAGACATCC	V3
YKR068C	BET3	GACAGGTAGGACATTACTCC	AGAGATACGGCACCATCGTC	V3
YDR389W	SAC7	ATGCTTGTGCAACGTGCGCC	CAAGACGCTGTTGCATTTGT	V3
YER073W	ALD5	AGACATAGCCGAATGGAGCC	ATGAAGGTTCCGTCAACTCC	V3
YML125C	PGA3	AATTTCGCCGCATGGTGCTG	ACATCGGTGGAATCGTGCTC	V3
YMR313C	TGL3	TTATCTTCCCGAGCGGTGCC	AACATGACTTGAGGCTGGTT	V3
YJR062C	NTA1	ATGGTTACCCGATTCTCCGT	CTGAGTAGTATATGGGCCTT	V3
YML016C	PPZ1	GAGTCTTCACCAGTTGACCG	ATACATGGATCAGCAGAGCG	V3
YAL007C	ERP2	ACCGACTGGTCACGTTTGCT	GTGACCCGGCTACCTATGTT	V3
YNR009W	NRM1	ACTATCCTGGAGCTAGAGGT	CGGCTAGTGAGACTTTCCTT	V3
YGL032C	AGA2	TTTATCCCAGGCAGTACGCG	TACCGTGACACAGGTGATCG	V3
YGR108W	CLB1	GTAGAGGAGCCCTTCCATCT	TTACGCCTTCGACGGCTGTT	V3
YGR083C	GCD2	ATCCATGCTCCAGGTTGGTG	TCATCGTGCGTAATGTCGCG	V3
YLR056W	ERG3	TACGGACTTGTCAGTATGGT	GGTACTGATCCTTCACGCTT	V3
YKL194C	MST1	ACATAGTGACCATCTCTCAG	CCGAGTGACACAGATAGAGC	V3
YEL017C-A	PMP2	GACGAGGGTGCATTTCACCT	AAGCTCCCTTGCCATGTGTT	V3
YJL094C	KHA1	CCACCATGATGAATTGTCAT	GCTCTCTCGAAATACACGAA	V3
YDR140W	MTQ2	GCGACAATCAACTCGATGCA	TGACGCTTCGGCATCTGTCT	V3
YGL020C	GET1	GATGCTAACCGACGATCTGC	GCATCATACGAATCCAGTAC	V3
YPR113W	PIS1	GAGACCACATCTAATTCAGC	CCCATGATCTCAATTAGGAC	V3
YNL130C	CPT1	CGACTAGGGACAGTTCTTAG	AGATCACCATCATAGCGACG	V3
YAL029C	MYO4	TCTCGAATGAGTGGCAAAGC	AGCTCAGGACGATTGTAGAT	V3
YNR026C	SEC12	CGACGACTGCTCACGATTAT	TATGAGTCTGCACGACCCTG	V3
YLR143W	DPH6	ACCTATTCCCGATTGGCGTT	CTGAGGGATCGACTGTTCTT	V3
YGL005C	COG7	ATATCGCACGTCACTCATGG	CCCGAGTATCTGAGCTGATT	V3
YOR105W	#REF!	CCACGCGGTAGATATAGTAT	AAGCCCGTTGTCCATCTATT	V3
YML086C	ALO1	CCTTCTTAGAGATGGTTAGG	GCCCGTGGACAAACTTCAAA	V3
YGR193C	PDX1	ATCATGCGCCAAGCCGTGTA	TTATGCACCGTGACGAGGCC	V3
YPL239W	YAR1	AGTGACGCCTTCGCACATTT	GGATGGCCCTCTTCTCAGTT	V3
YLR099W-A	MIM2	TTAGTAGTCCCGACGGCACT	CACGGTCGTTAGATGGTATT	V3
YDL157C	#REF!	ACTCGCGTATGAGGTCGTTT	TAGTACCTCGTCCCATAGTT	V3
YGR032W	GSC2	CAAGAGGATTGCATAGACCT	AGCCGGGACTGATCTTTATT	V3
YMR020W	FMS1	ATATTGCTCGAAGTGCCCGC	TTTATCCCACCGGCAGAATT	V3
YMR019W	STB4	CATCATTGGTGCATGGCGCT	CTCTTAGTGAGTAGGACGTT	V3
YOR152C	#REF!	GGACATCATACCAAGCCTGA	CGTGCCTACACATAAAGCTA	V3
YPL097W	MSY1	AGACCGCTACAACTGCTTGA	GCGCTAGTAAGCAATGAGTA	V3
YNL009W	IDP3	AGAGACGTTTGGCAACTCCC	GAGGAGACTACATACCATCC	V3
YPL259C	APM1	GCCCAAATAAGACGTGAGCC	GAGGAATAGCTCCGAACTCC	V3
YJL034W	KAR2	CTACATGCAGTACAGTGGAG	CCATCTAGTTGAATCCTGAG	V3
YML004C	GLO1	GGATTATCTACCACCTGACG	CCAAGAAATCTAAGTGCCCG	V3
YIL076W	SEC28	TACGATTGCAGAGATTGCTG	ACATGGACGACATTGTGCTC	V3
YML005W	TRM12	AGTAATAACGGATCGGTGCT	AGGCTCCTTCGACTCTGGTT	V3
YLR091W	GEP5	GACACTCTCGAACTGTAGGC	GCACGACTACGAGAGTATAG	V3
YNR007C	ATG3	TTTCTAGTACGGGCCAGCGT	AAAGCCTTGGTCATTGCCTT	V3
YKL191W	DPH2	CCTTAGAGTCGCCGGAATCT	AACGGAGCGTGATCTATGTT	V3
YER018C	SPC25	CTCAGGATAGTCATGGAGAT	GAACTGAATGCACTCGAGGC	V3
YDR128W	MTC5	TATATTTCCCGGAGGTGAGT	GTATGATCCGTGCAGCCCTT	V3
[truncated: 301 more rows]
