# Supplementary material for: Inhibition of transcription leads to rewiring of locus-specific chromatin proteomes
Source: Genome Res. 2020 Apr;30(4):635–46. doi: 10.1101/gr.256255.119 (PMC7197482; doi:10.1101/gr.256255.119)
Supplement: Supplemental Material [file supp_gr.256255.119_Supplemental_Table_S9.xlsx]

## Sheet: Readme
Epi-Decoder-HO_171107_4666
Index Reference Table
Raw sequencing data has been submitted to the NCBI BioProject database (https://www.ncbi.nlm.nih.gov/bioproject/) under accession number PRJNA610036, and to the the NCBI BioSample database (https://www.ncbi.nlm.nih.gov/biosample/) under accession number SAMN14271070

## Sheet: EpiDecoder2.0-HO_171107_4666
index nr	Index Sequence	Library Pool	Pool Label	Description	Pool
1	ATCACG	EpiDecoder2.0-HO-V1A	V1A	IP-Tap1	D1.1
2	CGATGT	EpiDecoder2.0-HO-V1B	V1B	IP-Tap2	D1.2
3	TTAGGC	EpiDecoder2.0-HO-V2A	V2A	IP-Tap3	D2.1
4	TGACCA	EpiDecoder2.0-HO-V2B	V2B	IP-Tap4	D2.2
5	ACAGTG	EpiDecoder2.0-HO-V3A	V3A	IP-Tap5	D3.1
6	GCCAAT	EpiDecoder2.0-HO-V3B	V3B	IP-Tap6	D3.2
13	AGTCAA	EpiDecoder2.0-HO-V1A	V1A	IN-Tap1	D1.1
14	AGTTCC	EpiDecoder2.0-HO-V1B	V1B	IN-Tap2	D1.2
15	ATGTCA	EpiDecoder2.0-HO-V2A	V2A	IN-Tap3	D2.1
16	CCGTCC	EpiDecoder2.0-HO-V2B	V2B	IN-Tap4	D2.2
17	GTAGAG	EpiDecoder2.0-HO-V3A	V3A	IN-Tap5	D3.1
18	GTCCGC	EpiDecoder2.0-HO-V3B	V3B	IN-Tap6	D3.2
