# Supplementary material for: Inhibition of transcription leads to rewiring of locus-specific chromatin proteomes
Source: Genome Res. 2020 Apr;30(4):635–46. doi: 10.1101/gr.256255.119 (PMC7197482; doi:10.1101/gr.256255.119)
Supplement: Supplemental Material [file supp_gr.256255.119_Supplemental_Table_S10.xlsx]

## Sheet: Readme
Epi-Decoder_Chrom-3xBC-HO_TXNi_180309_4852
Index Reference Table
Raw sequencing data has been submitted to the NCBI BioProject database (https://www.ncbi.nlm.nih.gov/bioproject/) under accession number PRJNA610036, and to the the NCBI BioSample database (https://www.ncbi.nlm.nih.gov/biosample/) under accession number SAMN14271071

## Sheet: Chrom-3xBC-HO-180309_4852
index nr	Index sequence	sample description	description
3	TTAGGC	DMSO, 75min (AU vehicle)	IP-Tap3
8	ACTTGA	Azauracil 2mg/mL, 5 min	IP-Tap8
9	GATCAG	Azauracil 2mg/mL, 12 min	IP-Tap9
10	TAGCTT	Azauracil 2mg/mL, 30 min	IP-Tap10
11	GGCTAC	Azauracil 2mg/mL, 75 min	IP-Tap11
12	CTTGTA	Phenantroline 100ug.mL, 5 min	IP-Tap12
13	AGTCAA	Phenantroline 100ug.mL, 12 min	IP-Tap13
14	AGTTCC	Phenantroline 100ug.mL, 30 min	IP-Tap14
15	ATGTCA	Phenantroline 100ug.mL, 75 min	IP-Tap15
16	CCGTCC	Azauracil 2mg/mL, 5 min_replicate	IP-Tap16
17	GTAGAG	Azauracil 2mg/mL, 12 min_replicate	IP-Tap17
18	GTCCGC	Azauracil 2mg/mL, 30 min_replicate	IP-Tap18
19	GTGAAA	Azauracil 2mg/mL, 75 min_replicate	IP-Tap19
20	GTGGCC	DMSO, 75min_Replicate (AU vehicle)	IP-Tap20
21	GTTTCG	EtOH, 75 min, (PH vehicle)	IP-Tap21
24	GGTAGC	DMSO, 75min, (AU vehicle)	IN-Tap3
29	CAACTA	Azauracil 2mg/mL, 5 min	IN-Tap8
30	CACCGG	Azauracil 2mg/mL, 12 min	IN-Tap9
31	CACGAT	Azauracil 2mg/mL, 30 min	IN-Tap10
32	CACTCA	Azauracil 2mg/mL, 75 min	IN-Tap11
33	CAGGCG	Phenantroline 100ug.mL, 5 min	IN-Tap12
34	CATGGC	Phenantroline 100ug.mL, 12 min	IN-Tap13
35	CATTTT	Phenantroline 100ug.mL, 30 min	IN-Tap14
36	CCAACA	Phenantroline 100ug.mL, 75 min	IN-Tap15
37	CGGAAT	Azauracil 2mg/mL, 5 min_repeat	IN-Tap16
38	CTAGCT	Azauracil 2mg/mL, 12 min_repeat	IN-Tap17
39	CTATAC	Azauracil 2mg/mL, 30 min_repeat	IN-Tap18
40	CTCAGA	Azauracil 2mg/mL, 75 min_repeat	IN-Tap19
41	AATTGT	DMSO, 75min, (AU vehicle)	IN-Tap20
42	TGGAGC	EtOH, 75 min, (PH vehicle)	IN-Tap21
