# Supplementary material for: Inhibition of transcription leads to rewiring of locus-specific chromatin proteomes
Source: Genome Res. 2020 Apr;30(4):635–46. doi: 10.1101/gr.256255.119 (PMC7197482; doi:10.1101/gr.256255.119)
Supplement: Supplemental Material [file supp_gr.256255.119_Supplemental_Table_S11.xlsx]

## Sheet: Readme
Epi-Decoder_Chrom-3xBC-HO_QC_190121_5279
Index Reference Table
Raw sequencing data has been submitted to the NCBI BioProject database (https://www.ncbi.nlm.nih.gov/bioproject/) under accession number PRJNA610036, and to the the NCBI BioSample database (https://www.ncbi.nlm.nih.gov/biosample/) under accession number SAMN14271072.

## Sheet: Chrom-3xBC-HO_190121_5279
Index nr	Index sequence	Sample description	description
1	ATCACG	Log cells 1	TAP-IP-1
2	CGATGT	Q cells 1	TAP-IP-2
3	TTAGGC	NQ cells 1	TAP-IP-3
4	TGACCA	Log 2 cells 2	TAP-IP-4
5	ACAGTG	Q cells 2	TAP-IP-5
6	GCCAAT	NQ cells 2	TAP-IP-6
7	CAGATC	Log cells 3	TAP-IP-7
8	ACTTGA	Q cells 3	TAP-IP-8
9	GATCAG	Log cells 1	input-1
10	TAGCTT	Q cells 1	input-2
11	GGCTAC	NQ cells 1	input-3
12	CTTGTA	Log 2 cells 2	input-4
13	AGTCAA	Q cells 2	input-5
14	AGTTCC	NQ cells 2	input-6
15	ATGTCA	Log cells 3	input-7
16	CCGTCC	Q cells 3	input-8
